# Supplementary material for: Transcription factor MITF and remodeller BRG1 define chromatin organisation at regulatory elements in melanoma cells
Source: eLife. 2015 Mar 24;4:e06857. doi: 10.7554/eLife.06857 (PMC4407272; doi:10.7554/eLife.06857)
Supplement: Supplementary file 1. — Related to Figure 1. Mass spectrometry identification of MITF partners. Excel table showing the data from the mass spectrometry analysis. Page 1 shows a summary of the number of peptides and proteins identified in the two experiments in the soluble nuclear and chromatin associated fractions. Page 2 lists the proteins identified uniquely in the F-H-MITF immunoprecipitates from the soluble nuclear fraction along with the number of peptides for each protein. Page 3 lists the proteins identified uniquely in the F-H-MITF immunoprecipitates from the chromatin-associated fraction along with the number of peptides for each protein. DOI: http://dx.doi.org/10.7554/eLife.06857.019 [file elife06857s001.xls]

## Sheet: Summary of mass-spec data
Immunoprecipitation	Total number of peptides	Total number of proteins.
Soluble nuclear fraction F-H-MITF	782	183
Soluble nuclear fraction F-H-MITF	1650	287
Soluble nuclear fraction native 501Mel	63	30
Soluble nuclear fraction native 501Mel	39	12
Chromatin-associated fraction F-H-MITF	1300	313
Chromatin-associatedfraction F-H-MITF	903	70
Chromatin-associated fraction native 501Mel	414	107
Chromatin-associated fraction native 501Mel	70	26

## Sheet: MITF partners SNF
MITF partners	Peptides
AATF	3
ABCF2	1
ACSL1	7
ACSL5	1
ACTA1	1
ADAR	2
AKAP8	18
AKAP8L	23
ANAPC7	9
ANKRD44	1
AP1B1	2
AP3D1	1
API5	4
ARCN1	2
ARHGEF2	21
ARMC8	1
ATM	2
ATP5A1	2
BAG2	3
BAT1	8
BRWD2	4
BTAF1	1
C14orf21	1
C3orf17	2
CAPZA1	1
CAPZB	1
CBX4	1
CCT3	2
CHD2	1
CHD4	7
CHD7	2
CHD8	2
CLNS1A	1
COPA	36
COPB1	18
COPB2	17
COPG	15
COPG2	2
CPSF1	2
CSE1L	13
CTAG1A	1
CTNNB1	12
DDB1	16
DDX1	1
DDX17	10
DDX20	8
DDX21	7
DDX39	9
DDX3X	10
DDX5	18
DHX15	4
DHX9	29
DNAJA1	2
DNAJC10	1
DNM2	2
DYNC1H1	1
EEF1A1	6
EEF1A2	11
EEF2	1
EFTUD2	19
EIF2B4	1
EIF3A	3
EIF3CL	4
EIF3D	6
EIF3L	1
EIF4A1	9
EPS8	1
EWSR1	2
EXOSC10	3
FARP2	1
FLII	3
FMR1	1
FNBP1L	4
FUBP3	1
FXR1	2
GCN1L1	25
GEMIN4	11
GIGYF2	2
GNB2L1	1
GNL2	3
GNL3	9
GSN	6
GTF3C1	25
GTF3C2	1
GTF3C3	13
GTF3C4	2
GTPBP4	1
HADHA	2
HERC2	114
HERC2P2	1
HNRNPA3	1
HNRNPF	13
HNRNPH1	5
HNRNPK	12
HNRNPL	5
HNRNPM	63
HNRNPR	2
HNRNPU	18
HNRNPUL1	1
HNRPLL	1
HSP90AA1	4
HSP90AA2	4
HSP90AB1	6
HSP90B1	1
HSPA1L	12
HSPA4	21
HSPA5	11
HSPA7	4
HSPA9	3
HSPD1	1
HSPH1	18
ILF2	1
INTS7	1
INTS8	1
IPI:IPI00069693.4	1
IPI:IPI00911039.1	2
IPO5	1
IQGAP1	45
JAK1	1
KHDRBS1	3
KIAA0776	5
KIAA1967	18
KPNA1	6
KPNA2	21
KPNA4	5
KPNB1	42
LAS1L	7
LRPPRC	4
MAEA	1
MAP1B	3
MAP7D1	4
MAPK1	2
MARS	1
MATR3	21
MCM3	7
MCM5	12
MCM7	15
MDN1	6
MITF	29
MKI67	6
MSH2	8
MSH6	11
MTOR	1
MYBBP1A	3
MYO1A	1
MYO1B	9
MYO9B	5
NCL	5
NDN	6
NES	2
NEURL4	27
NOC2L	1
NOC4L	3
NOL11	1
NOP14	6
NOP56	2
NOP58	1
NPM1	17
NSUN2	2
NUMA1	18
NUP153	26
NUP155	1
NUP50	19
PARP1	1
PBRM1	3
PCBP1	6
PCBP2	3
PDCD11	5
PDS5A	2
PELP1	3
PES1	1
PHC3	1
PHGDH	1
PLEKHA5	4
PLK1	14
PML	2
POLR1A	1
POLR2B	1
POP1	2
PPP2R1A	1
PRKAA1	1
PRKDC	58
PRPF31	3
PRPF6	13
PRPF8	38
PRPH	4
PSMC2	1
PSMC3	2
PSMD1	3
PSMD2	7
PSMD3	1
PTBP1	5
RAB38	1
RANBP10	2
RANBP2	1
RANBP6	1
RANBP9	3
RANGAP1	3
RBM14	9
RBM15	1
RBM39	6
RFC1	6
RFC2	6
RFC4	6
RFC5	3
RICTOR	2
RIOK1	2
RPL11	1
RPL13P12	2
RPL14	1
RPL18	4
RPL29P30	1
RPL3	1
RPL38	1
RPL4	4
RPL6	1
RPL7	1
RPL8	2
RPLP0	5
RPLP2	1
RPRD2	1
RPS2	2
RPS25	2
RPS26P54	1
RPS4X	5
RPS8	1
RPS9	3
RPSAP12	2
RRP12	4
RSL1D1	1
RUVBL1	15
RUVBL2	11
SAMD4B	1
SEC16A	1
SENP5	2
SF3A1	1
SF3A3	1
SF3B1	7
SF3B2	1
SFPQ	1
SFRS14	4
SKIV2L2	11
SLFN5	2
SLTM	2
SMARCA4	7
SMARCA5	2
SMARCC2	4
SMC1A	6
SMC3	5
SMN2	4
SNRNP200	31
SPEN	1
SRBD1	2
SRP68	3
SRP72	1
SSBP1	1
SSSCA1	2
STAG2	1
STRBP	1
SYMPK	1
SYNCRIP	1
TCERG1	1
TCP1	2
TEX10	4
TFE3	20
TFEB	13
TFEC	9
TH1L	1
TMOD3	2
TMPO	8
TNPO1	7
TNPO3	1
TOP1	5
TOP2A	6
TOP2B	9
TRIM28	25
TRIM32	1
TRIM54	1
TRIP12	1
TRIP13	1
TRMT2A	1
TTF2	1
TUBA1A	2
TUBA4A	35
TUBA4B	1
TUBB1	9
TUBB2A	4
TUBB2C	38
TUBB3	4
TUBB4	5
TUBGCP3	1
TUFM	3
UBC	3
UBR4	1
UBR5	38
USO1	2
USP11	24
USP15	1
USP4	1
USP7	13
USP9X	3
VARS	1
VPS18	1
VPS35	1
WDR18	2
WDR26	8
WDR77	5
XPO1	16
XPO5	5
XRCC5	13
XRCC6	7
XRN2	5
YWHAE	2
ZC3H11A	4
ZCCHC8	8
ZNF148	1
ZNF281	1
ZNF644	3

## Sheet: MITF partners CAF
MITF partners	Peptides
AATF	1
ABCF2	4
ACSL4	2
ACTA1	1
ACTL6A	3
ACTN1	1
ADAR	1
ADNP	2
AHCTF1	3
AKAP8	2
AKAP8L	14
ALDH1B1	4
ANXA1	1
ARID5B	2
ATAD2	3
ATP1A1	3
ATP1A2	1
ATP1B3	1
ATP2A2	1
ATP5C1	5
ATP5O	3
BAG2	8
BAZ1B	1
BCAP31	2
BNC2	6
BPTF	18
BRCA2	14
C1QBP	1
C22orf30	3
CASC5	1
CBX1	1
CBX3	2
CCT3	1
CCT6A	1
CEBPB	1
CENPB	3
CHAF1B	1
CHD4	16
CHD6	5
CHD7	2
CIRH1A	1
CLPX	7
CLTC	3
CLTCL1	2
COPA	3
CTAG1A	1
CTNNB1	20
CTSB	3
CUX1	2
DAP3	2
DBN1	1
DDB1	11
DDOST	4
DDX17	4
DDX21	10
DDX23	4
DDX27	1
DDX39	6
DHX15	5
DNAJA1	2
DNAJA2	1
DNAJB11	1
DNAJB6	3
EFTUD2	17
EHMT2	7
EIF3A	1
EIF3D	3
EIF3L	1
EIF3M	1
EIF4A1	8
EP400	1
ERAL1	2
FASTKD2	2
FASTKD5	1
FBLL1	1
FUSIP1	1
GATAD2B	1
GNAL	1
GNB2L1	4
GNL2	1
GNL3	16
GSG2	2
GTF3C1	7
GTF3C4	3
GTF3C5	1
GTPBP4	8
HADHB	8
HDAC1	3
HDAC2	4
HEATR1	3
HNRNPF	17
HNRNPL	1
HNRNPM	28
HNRNPUL2	7
HSP90AB1	9
HSP90AB2P	1
HSPA1A	12
HSPA1L	10
HSPB1	3
HSPH1	2
HYOU1	1
IDH3A	11
IDH3B	1
IGF2BP2	1
IGF2BP3	1
ILF3	1
INTS12	2
IPI:IPI00062599.3	2
IPI:IPI00069693.4	2
IPI:IPI00176696.2	1
IPI:IPI00911039.1	1
KDM1	2
KHDRBS1	4
KIAA0020	1
KIAA1967	8
KIF18B	2
KIF20A	1
KIF23	3
KPNA2	13
KPNA4	3
KPNB1	17
LAS1L	12
LGALS3BP	3
LIG3	1
LMNB1	13
LRRC59	1
MAGEC1	1
MAP7D1	5
MATR3	9
MCM3	5
MCM5	4
MCM7	4
MDN1	2
MITF	15
MRE11A	1
MRPL23	1
MRPS27	1
MSH6	4
MTA1	3
MTA2	6
MYL6	1
MYO1B	2
MYO9B	3
NAT10	6
NCOR1	1
NDUFS1	1
NDUFS3	1
NFYC	1
NOC4L	1
NOL9	3
NOP14	1
NOP2	3
NOP56	16
NOP58	8
NUMA1	7
ORC1L	3
PARP1	1
PBRM1	2
PCBP1	2
PCBP2	4
PELP1	3
PES1	2
PHB	2
PHB2	3
PLEKHA5	1
PLEKHO2	1
PLK1	4
PML	2
POLR2A	1
POLR2B	4
PRAME	3
PRKDC	22
PRPF19	2
PRPF6	12
PSMC2	3
PSMC3	3
PSMC5	1
PSMD1	1
PSMD11	1
PSMD12	1
PTBP1	1
PTCD1	1
PTPLAD1	1
RAB10	1
RAB32	3
RAB38	1
RAB7A	4
RAD51	1
RALY	22
RALYL	2
RANBP2	1
RAP1B	1
RBBP4	7
RBM39	2
RBMXL2	1
RCN2	4
REV3L	1
RFC1	9
RFC2	6
RFC4	8
RFC5	7
RFX1	3
RG9MTD1	7
RPL11	3
RPL12	2
RPL13	3
RPL13A	1
RPL13P12	3
RPL14	1
RPL15	3
RPL18A	2
RPL19	2
RPL21P19	2
RPL23	4
RPL24	5
RPL27A	1
RPL29P30	1
RPL3	7
RPL31	2
RPL35	1
RPL38	1
RPL4	11
RPL6	3
RPL7	4
RPL7A	2
RPL7AP27	1
RPL8	3
RPL9	1
RPLP0	5
RPLP1	2
RPN1	11
RPN2	6
RPS11	2
RPS13	2
RPS14	4
RPS15A	3
RPS16	8
RPS17	1
RPS18	4
RPS19	2
RPS2	8
RPS20	2
RPS23	2
RPS24	1
RPS25	3
RPS26P54	1
RPS27	1
RPS3	12
RPS3A	5
RPS4X	8
RPS6	4
RPS7	1
RPS8	5
RPS9	9
RRS1	1
RSL1D1	3
RUNX3	3
RUVBL1	20
RUVBL2	20
SATB1	1
SEC22B	1
SETX	2
SGOL2	1
SLC25A13	2
SLC25A3	3
SLC25A6	1
SLFN5	3
SMARCA1	9
SMARCA4	19
SMARCA5	13
SMARCC2	3
SMARCD2	2
SMC1A	5
SMC3	5
SND1	1
SNRNP200	28
SON	4
SOX10	1
SPEN	1
SSRP1	3
SSX2B	1
STT3A	2
STX7	1
SUPT16H	1
SYNCRIP	4
TARDBP	3
TBL3	1
TCERG1	1
TCF7	1
TCF7L2	2
TEX10	3
TFAM	3
TFE3	8
TFEB	3
TFEC	8
TIMELESS	1
TIMM50	1
TMEM109	2
TMEM33	2
TOP2A	1
TOP2B	1
TRIM24	1
TRIM27	1
TRIM28	18
TRIM33	8
TRIM63	1
TRRAP	11
TUBA1A	2
TUBA4A	33
TUBA4B	2
TUBB	15
TUBB1	10
TUBB2A	6
TUBB2C	38
TUBB3	3
TUBB4	5
UBC	4
USP11	3
UTP14A	1
VDAC1	4
VDAC2	7
VDAC3	1
VTN	1
WDR3	2
WDR36	1
WDR43	2
XRCC5	25
XRCC6	31
ZBTB20	2
ZBTB38	2
ZC3H11A	6
ZEB2	6
ZMYND8	1
ZNF281	7
ZNF609	3
ZNF644	6
ZNF687	4
