# Supplementary material for: Transcription factor MITF and remodeller BRG1 define chromatin organisation at regulatory elements in melanoma cells
Source: eLife. 2015 Mar 24;4:e06857. doi: 10.7554/eLife.06857 (PMC4407272; doi:10.7554/eLife.06857)
Supplement: Supplementary file 2. — Related to Figure 2. Excel spread sheet of genes specifically and commonly regulated by BRG1 and MITF knockdown in 501Mel and Hermes 3A cells along with the appropriate gene ontology, see Figures S3B–D. DOI: http://dx.doi.org/10.7554/eLife.06857.020 [file elife06857s002.xlsx]

## Sheet: 501M_shBRG1_Down-List
Ensembl gene id	Gene name	Description	Average log2 change (shBRG1/shControl)	Adjusted p-value
ENSG00000004799	PDK4	pyruvate dehydrogenase kinase, isozyme 4	-1.80311	0
ENSG00000018236	CNTN1	contactin 1	-3.20543	2.27514e-239
ENSG00000019549	SNAI2	snail homolog 2 (Drosophila)	-2.58691	0
ENSG00000026508	CD44	CD44 molecule (Indian blood group)	-2.61046	2.98954e-18
ENSG00000033627	ATP6V0A1	ATPase, H+ transporting, lysosomal V0 subunit a1	-1.16254	6.06317e-217
ENSG00000035862	TIMP2	TIMP metallopeptidase inhibitor 2	-1.58137	3.69553e-147
ENSG00000044524	EPHA3	EPH receptor A3	-1.56017	9.68591e-39
ENSG00000047644	WWC3	WWC family member 3	-1.3244	3.89534e-36
ENSG00000049860	HEXB	hexosaminidase B (beta polypeptide)	-2.05544	0
ENSG00000054793	ATP9A	ATPase, class II, type 9A	-1.52044	1.89102e-186
ENSG00000054983	GALC	galactosylceramidase	-1.55114	1.38377e-09
ENSG00000055163	CYFIP2	cytoplasmic FMR1 interacting protein 2	-1.20786	7.66982e-77
ENSG00000057704	TMCC3	transmembrane and coiled-coil domain family 3	-3.08247	0
ENSG00000058453	CROCC	ciliary rootlet coiled-coil, rootletin	-1.97327	0
ENSG00000058668	ATP2B4	ATPase, Ca++ transporting, plasma membrane 4	-1.0469	1.20407e-56
ENSG00000065361	ERBB3	v-erb-b2 erythroblastic leukemia viral oncogene homolog 3 (avian)	-1.23154	4.01964e-18
ENSG00000067840	PDZD4	PDZ domain containing 4	-2.89065	0
ENSG00000070159	PTPN3	protein tyrosine phosphatase, non-receptor type 3	-1.24545	2.24963e-05
ENSG00000075340	ADD2	adducin 2 (beta)	-2.57437	0
ENSG00000075651	PLD1	phospholipase D1, phosphatidylcholine-specific	-3.03041	0
ENSG00000076864	RAP1GAP	RAP1 GTPase activating protein	-1.34167	1.68392e-36
ENSG00000077942	FBLN1	fibulin 1	-1.95804	5.13103e-82
ENSG00000078098	FAP	fibroblast activation protein, alpha	-1.54996	9.82824e-18
ENSG00000079385	CEACAM1	carcinoembryonic antigen-related cell adhesion molecule 1 (biliary glycoprotein)	-3.60523	3.31141e-258
ENSG00000079931	MOXD1	monooxygenase, DBH-like 1	-2.69824	0
ENSG00000080166	DCT	dopachrome tautomerase (dopachrome delta-isomerase, tyrosine-related protein 2)	-5.00238	3.17584e-190
ENSG00000081059	TCF7	transcription factor 7 (T-cell specific, HMG-box)	-1.42276	5.18076e-78
ENSG00000086991	NOX4	NADPH oxidase 4	-4.61881	0
ENSG00000088882	CPXM1	carboxypeptidase X (M14 family), member 1	-4.88801	0
ENSG00000089041	P2RX7	purinergic receptor P2X, ligand-gated ion channel, 7	-2.77447	8.33722e-106
ENSG00000092621	PHGDH	phosphoglycerate dehydrogenase	-1.47957	1.10103e-71
ENSG00000096696	DSP	desmoplakin	-1.79566	7.78063e-30
ENSG00000100097	LGALS1	lectin, galactoside-binding, soluble, 1	-1.39971	1.16538e-44
ENSG00000100234	TIMP3	TIMP metallopeptidase inhibitor 3	-1.35619	1.61594e-43
ENSG00000101000	PROCR	protein C receptor, endothelial	-3.02358	2.42375e-102
ENSG00000101197	BIRC7	baculoviral IAP repeat containing 7	-2.88293	0
ENSG00000101974	ATP11C	ATPase, class VI, type 11C	-1.35542	3.07443e-16
ENSG00000103175	WFDC1	WAP four-disulfide core domain 1	-1.33996	1.91319e-07
ENSG00000103381	CPPED1	calcineurin-like phosphoesterase domain containing 1	-1.42464	1.67479e-139
ENSG00000103544	C16orf62	chromosome 16 open reading frame 62	-1.1302	7.26302e-92
ENSG00000103994	ZFP106	zinc finger protein 106 homolog (mouse)	-1.75751	3.85649e-298
ENSG00000104044	OCA2	oculocutaneous albinism II	-4.01373	0
ENSG00000104093	DMXL2	Dmx-like 2	-1.64865	3.20122e-83
ENSG00000104332	SFRP1	secreted frizzled-related protein 1	-4.39033	7.68739e-35
ENSG00000104490	NCALD	neurocalcin delta	-3.24825	0
ENSG00000104518	GSDMD	gasdermin D	-1.07618	1.83872e-15
ENSG00000105559	PLEKHA4	pleckstrin homology domain containing, family A (phosphoinositide binding specific) member 4	-1.20881	1.84667e-121
ENSG00000105767	CADM4	cell adhesion molecule 4	-2.52501	0
ENSG00000106624	AEBP1	AE binding protein 1	-3.83487	0
ENSG00000106772	PRUNE2	prune homolog 2 (Drosophila)	-3.08978	3.04352e-201
ENSG00000107165	TYRP1	tyrosinase-related protein 1	-4.04758	0
ENSG00000107518	ATRNL1	attractin-like 1	-2.53199	2.46507e-274
ENSG00000108387	SEPT4	septin 4	-2.14279	0
ENSG00000108828	VAT1	vesicle amine transport protein 1 homolog (T. californica)	-1.58128	0
ENSG00000109819	PPARGC1A	peroxisome proliferator-activated receptor gamma, coactivator 1 alpha	-3.3961	7.21111e-203
ENSG00000109846	CRYAB	crystallin, alpha B	-2.68473	7.80361e-99
ENSG00000110092	CCND1	cyclin D1	-1.84597	0
ENSG00000111275	ALDH2	aldehyde dehydrogenase 2 family (mitochondrial)	-2.79297	0
ENSG00000111335	OAS2	2'-5'-oligoadenylate synthetase 2, 69/71kDa	-1.68268	8.26385e-11
ENSG00000112414	GPR126	G protein-coupled receptor 126	-1.55477	1.34558e-50
ENSG00000115159	GPD2	glycerol-3-phosphate dehydrogenase 2 (mitochondrial)	-1.29968	5.03092e-64
ENSG00000115415	STAT1	signal transducer and activator of transcription 1, 91kDa	-1.64872	1.19979e-123
ENSG00000115457	IGFBP2	insulin-like growth factor binding protein 2, 36kDa	-2.05574	7.37291e-300
ENSG00000115561	CHMP3	charged multivesicular body protein 3	-1.03025	1.64956e-81
ENSG00000115902	SLC1A4	solute carrier family 1 (glutamate/neutral amino acid transporter), member 4	-3.88332	0
ENSG00000115935	WIPF1	WAS/WASL interacting protein family, member 1	-1.69432	3.63046e-76
ENSG00000116679	IVNS1ABP	influenza virus NS1A binding protein	-1.23567	4.9739e-232
ENSG00000118503	TNFAIP3	tumor necrosis factor, alpha-induced protein 3	-1.41815	0
ENSG00000119508	NR4A3	nuclear receptor subfamily 4, group A, member 3	-1.56802	2.60036e-180
ENSG00000119655	NPC2	Niemann-Pick disease, type C2	-1.44885	0
ENSG00000122133	PAEP	progestagen-associated endometrial protein	-7.10936	0
ENSG00000122729	ACO1	aconitase 1, soluble	-1.6464	0
ENSG00000123560	PLP1	proteolipid protein 1	-2.32649	6.71199e-114
ENSG00000124608	AARS2	alanyl-tRNA synthetase 2, mitochondrial (putative)	-1.16775	0
ENSG00000126217	MCF2L	MCF.2 cell line derived transforming sequence-like	-1.39107	2.21814e-67
ENSG00000126709	IFI6	interferon, alpha-inducible protein 6	-1.43111	3.21627e-51
ENSG00000128487	SPECC1	sperm antigen with calponin homology and coiled-coil domains 1	-1.2493	1.87302e-110
ENSG00000128564	VGF	VGF nerve growth factor inducible	-2.01827	1.60442e-277
ENSG00000128596	CCDC136	coiled-coil domain containing 136	-2.40319	1.72857e-183
ENSG00000128928	IVD	isovaleryl-CoA dehydrogenase	-1.16949	5.57631e-217
ENSG00000129657	SEC14L1	SEC14-like 1 (S. cerevisiae)	-1.07877	1.17971e-150
ENSG00000130303	BST2	bone marrow stromal cell antigen 2	-2.39446	5.21034e-14
ENSG00000130396	MLLT4	myeloid/lymphoid or mixed-lineage leukemia (trithorax homolog, Drosophila); translocated to, 4	-1.94581	5.53644e-203
ENSG00000130558	OLFM1	olfactomedin 1	-1.02487	3.84371e-06
ENSG00000131634	TMEM204	transmembrane protein 204	-1.84315	2.27227e-243
ENSG00000132185	FCRLA	Fc receptor-like A	-2.53973	2.22905e-182
ENSG00000132386	SERPINF1	serpin peptidase inhibitor, clade F (alpha-2 antiplasmin, pigment epithelium derived factor), member 1	-4.50013	0
ENSG00000132688	NES	nestin	-2.29086	1.16841e-153
ENSG00000132692	BCAN	brevican	-3.20944	0
ENSG00000133195	SLC39A11	solute carrier family 39 (metal ion transporter), member 11	-2.04495	0
ENSG00000134121	CHL1	cell adhesion molecule with homology to L1CAM (close homolog of L1)	-3.38701	0
ENSG00000134574	DDB2	damage-specific DNA binding protein 2, 48kDa	-1.16378	3.68034e-34
ENSG00000134802	SLC43A3	solute carrier family 43, member 3	-1.68804	8.50604e-31
ENSG00000135914	HTR2B	5-hydroxytryptamine (serotonin) receptor 2B, G protein-coupled	-1.70771	1.18902e-12
ENSG00000136732	GYPC	glycophorin C (Gerbich blood group)	-1.10438	4.30839e-42
ENSG00000136859	ANGPTL2	angiopoietin-like 2	-2.36324	2.85911e-54
ENSG00000137571	SLCO5A1	solute carrier organic anion transporter family, member 5A1	-2.61084	2.75349e-298
ENSG00000137962	ARHGAP29	Rho GTPase activating protein 29	-1.37176	2.13555e-74
ENSG00000138613	APH1B	anterior pharynx defective 1 homolog B (C. elegans)	-1.8987	3.3324e-97
ENSG00000138639	ARHGAP24	Rho GTPase activating protein 24	-1.3316	3.28068e-21
ENSG00000138758	SEPT11	septin 11	-1.91543	3.2676e-229
ENSG00000140443	IGF1R	insulin-like growth factor 1 receptor	-1.58237	0
ENSG00000141424	SLC39A6	solute carrier family 39 (zinc transporter), member 6	-2.79303	0
ENSG00000142089	IFITM3	interferon induced transmembrane protein 3	-1.41991	2.29622e-60
ENSG00000142156	COL6A1	collagen, type VI, alpha 1	-2.47419	9.51717e-199
ENSG00000143153	ATP1B1	ATPase, Na+/K+ transporting, beta 1 polypeptide	-1.9449	0
ENSG00000143653	SCCPDH	saccharopine dehydrogenase (putative)	-1.31661	3.70075e-12
ENSG00000143772	ITPKB	inositol-trisphosphate 3-kinase B	-2.74742	0
ENSG00000143847	PPFIA4	protein tyrosine phosphatase, receptor type, f polypeptide (PTPRF), interacting protein (liprin), alpha 4	-2.0034	0
ENSG00000144645	OSBPL10	oxysterol binding protein-like 10	-5.68967	0
ENSG00000144668	ITGA9	integrin, alpha 9	-2.63935	3.34902e-101
ENSG00000145040	UCN2	urocortin 2	-3.78886	5.11147e-92
ENSG00000146966	DENND2A	DENN/MADD domain containing 2A	-2.40204	2.63265e-251
ENSG00000147439	BIN3	bridging integrator 3	-1.03977	2.85554e-119
ENSG00000147650	LRP12	low density lipoprotein receptor-related protein 12	-1.03958	5.93868e-122
ENSG00000148175	STOM	stomatin	-1.26051	2.5909e-173
ENSG00000148925	BTBD10	BTB (POZ) domain containing 10	-1.23798	5.05534e-142
ENSG00000149557	FEZ1	fasciculation and elongation protein zeta 1 (zygin I)	-1.29867	4.12928e-29
ENSG00000149927	DOC2A	double C2-like domains, alpha	-3.30563	0
ENSG00000150625	GPM6A	glycoprotein M6A	-1.18046	1.89296e-87
ENSG00000151692	RNF144A	ring finger protein 144A	-2.08645	7.86943e-292
ENSG00000152078	TMEM56	transmembrane protein 56	-1.77851	1.8461e-93
ENSG00000152207	CYSLTR2	cysteinyl leukotriene receptor 2	-3.63213	8.33686e-08
ENSG00000154127	UBASH3B	ubiquitin associated and SH3 domain containing B	-2.23992	3.13998e-211
ENSG00000154589	LY96	lymphocyte antigen 96	-3.39696	1.36985e-50
ENSG00000154856	APCDD1	adenomatosis polyposis coli down-regulated 1	-2.467	0
ENSG00000156535	CD109	CD109 molecule	-1.81449	1.28911e-82
ENSG00000157601	MX1	myxovirus (influenza virus) resistance 1, interferon-inducible protein p78 (mouse)	-1.64277	3.17887e-45
ENSG00000157827	FMNL2	formin-like 2	-1.342	2.99143e-96
ENSG00000158106	RHPN1	rhophilin, Rho GTPase binding protein 1	-2.54398	5.28764e-251
ENSG00000160781	PAQR6	progestin and adipoQ receptor family member VI	-2.01348	2.68857e-223
ENSG00000161896	IP6K3	inositol hexakisphosphate kinase 3	-2.9235	1.28205e-12
ENSG00000162745	OLFML2B	olfactomedin-like 2B	-2.06172	2.01004e-08
ENSG00000162777	DENND2D	DENN/MADD domain containing 2D	-4.12892	0
ENSG00000163171	CDC42EP3	CDC42 effector protein (Rho GTPase binding) 3	-1.57559	2.02772e-72
ENSG00000163430	FSTL1	follistatin-like 1	-4.3917	0
ENSG00000163513	TGFBR2	transforming growth factor, beta receptor II (70/80kDa)	-1.46941	2.13466e-130
ENSG00000163599	CTLA4	cytotoxic T-lymphocyte-associated protein 4	-3.9777	0
ENSG00000163820	FYCO1	FYVE and coiled-coil domain containing 1	-1.73533	1.98783e-157
ENSG00000164120	HPGD	hydroxyprostaglandin dehydrogenase 15-(NAD)	-3.01575	1.20169e-238
ENSG00000164175	SLC45A2	solute carrier family 45, member 2	-2.4158	7.35758e-261
ENSG00000164684	ZNF704	zinc finger protein 704	-1.41188	5.41009e-153
ENSG00000165716	FAM69B	family with sequence similarity 69, member B	-3.04775	0
ENSG00000166033	HTRA1	HtrA serine peptidase 1	-3.96076	2.30095e-25
ENSG00000166340	TPP1	tripeptidyl peptidase I	-1.04192	0
ENSG00000166473	PKD1L2	polycystic kidney disease 1-like 2	-2.43172	1.23802e-278
ENSG00000167106	FAM102A	family with sequence similarity 102, member A	-1.10812	2.84439e-118
ENSG00000168297	PXK	PX domain containing serine/threonine kinase	-1.4236	1.62093e-119
ENSG00000168394	TAP1	transporter 1, ATP-binding cassette, sub-family B (MDR/TAP)	-1.25508	2.10528e-173
ENSG00000168710	AHCYL1	adenosylhomocysteinase-like 1	-1.78113	0
ENSG00000168778	TCTN2	tectonic family member 2	-1.38588	8.7888e-146
ENSG00000169242	EFNA1	ephrin-A1	-2.77343	2.94832e-176
ENSG00000169562	GJB1	gap junction protein, beta 1, 32kDa	-1.25462	1.31901e-70
ENSG00000170004	CHD3	chromodomain helicase DNA binding protein 3	-1.29756	0
ENSG00000170275	CRTAP	cartilage associated protein	-1.53264	0
ENSG00000170500	LONRF2	LON peptidase N-terminal domain and ring finger 2	-2.12901	2.73124e-128
ENSG00000171219	CDC42BPG	CDC42 binding protein kinase gamma (DMPK-like)	-1.95557	4.11446e-225
ENSG00000172183	ISG20	interferon stimulated exonuclease gene 20kDa	-2.69219	0
ENSG00000173210	ABLIM3	actin binding LIM protein family, member 3	-1.00888	1.69451e-16
ENSG00000173546	CSPG4	chondroitin sulfate proteoglycan 4	-1.89875	1.60936e-18
ENSG00000174233	ADCY6	adenylate cyclase 6	-1.48236	4.37658e-251
ENSG00000175198	PCCA	propionyl CoA carboxylase, alpha polypeptide	-3.04147	0
ENSG00000175899	A2M	alpha-2-macroglobulin	-2.50627	1.4561e-144
ENSG00000176490	DIRAS1	DIRAS family, GTP-binding RAS-like 1	-1.56283	4.55437e-53
ENSG00000176658	MYO1D	myosin ID	-1.07259	9.82982e-28
ENSG00000178685	PARP10	poly (ADP-ribose) polymerase family, member 10	-1.66357	6.24005e-104
ENSG00000178878	APOLD1	apolipoprotein L domain containing 1	-1.82165	2.76092e-258
ENSG00000182240	BACE2	beta-site APP-cleaving enzyme 2	-2.06878	4.42356e-17
ENSG00000182871	COL18A1	collagen, type XVIII, alpha 1	-2.73546	6.46252e-247
ENSG00000183615	FAM167B	family with sequence similarity 167, member B	-2.35469	5.71878e-39
ENSG00000184304	PRKD1	protein kinase D1	-2.15472	4.94105e-79
ENSG00000184381	PLA2G6	phospholipase A2, group VI (cytosolic, calcium-independent)	-1.04693	7.3017e-164
ENSG00000184719	RNLS	renalase, FAD-dependent amine oxidase	-1.4125	3.81747e-258
ENSG00000185565	LSAMP	limbic system-associated membrane protein	-1.64413	9.64491e-123
ENSG00000185621	LMLN	leishmanolysin-like (metallopeptidase M8 family)	-1.56846	4.30134e-133
ENSG00000185745	IFIT1	interferon-induced protein with tetratricopeptide repeats 1	-1.62876	5.02472e-59
ENSG00000186480	INSIG1	insulin induced gene 1	-2.14069	0
ENSG00000189058	APOD	apolipoprotein D	-5.99472	0
ENSG00000196730	DAPK1	death-associated protein kinase 1	-2.57236	1.0351e-07
ENSG00000197702	PARVA	parvin, alpha	-1.43374	1.39414e-103
ENSG00000198203	SULT1C2	sulfotransferase family, cytosolic, 1C, member 2	-3.96386	0
ENSG00000198910	L1CAM	L1 cell adhesion molecule	-3.44269	1.17449e-22
ENSG00000205336	GPR56	G protein-coupled receptor 56	-2.67119	0
ENSG00000213853	EMP2	epithelial membrane protein 2	-1.63543	1.76659e-60
ENSG00000221978	CCNL2	cyclin L2	-1.07703	3.67104e-273
ENSG00000236384	LINC00479	long intergenic non-protein coding RNA 479	-4.92096	0
ENSG00000244509	APOBEC3C	apolipoprotein B mRNA editing enzyme, catalytic polypeptide-like 3C	-2.33035	3.50068e-11
ENSG00000253490	AC145110.1		-3.8943	1.52252e-295
ENSG00000255346	NOX5	NADPH oxidase, EF-hand calcium binding domain 5	-7.16921	6.15991e-289
ENSG00000258791	LINC00520	long intergenic non-protein coding RNA 520	-1.75412	6.31851e-261
ENSG00000266554	RP11-527H14.2		-1.05	1.45967e-26
ENSG00000108771	DHX58	DEXH (Asp-Glu-X-His) box polypeptide 58	-1.14552	4.8884e-10
ENSG00000143416	SELENBP1	selenium binding protein 1	-2.50983	3.88227e-69
ENSG00000112561	TFEB	transcription factor EB	-2.95753	2.54234e-281
ENSG00000224397	RP11-290F20.3		-5.78366	6.75218e-105
ENSG00000140678	ITGAX	integrin, alpha X (complement component 3 receptor 4 subunit)	-5.61046	0
ENSG00000177409	SAMD9L	sterile alpha motif domain containing 9-like	-1.92548	3.24235e-19
ENSG00000147852	VLDLR	very low density lipoprotein receptor	-1.07005	5.17178e-43
ENSG00000163093	BBS5	Bardet-Biedl syndrome 5	-1.06339	5.5055e-140
ENSG00000185201	IFITM2	interferon induced transmembrane protein 2	-1.93706	7.85672e-14
ENSG00000197496	SLC2A10	solute carrier family 2 (facilitated glucose transporter), member 10	-1.46327	2.71273e-97
ENSG00000118762	PKD2	polycystic kidney disease 2 (autosomal dominant)	-2.1943	0
ENSG00000103365	GGA2	golgi-associated, gamma adaptin ear containing, ARF binding protein 2	-1.26943	0
ENSG00000185008	ROBO2	roundabout, axon guidance receptor, homolog 2 (Drosophila)	-2.11328	0
ENSG00000160712	IL6R	interleukin 6 receptor	-2.167	0
ENSG00000106078	COBL	cordon-bleu homolog (mouse)	-1.73705	7.13879e-169
ENSG00000082212	ME2	malic enzyme 2, NAD(+)-dependent, mitochondrial	-1.36384	1.24776e-121
ENSG00000164778	EN2	engrailed homeobox 2	-2.56511	0
ENSG00000118276	B4GALT6	UDP-Gal:betaGlcNAc beta 1,4- galactosyltransferase, polypeptide 6	-2.15058	4.35891e-82
ENSG00000111229	ARPC3	actin related protein 2/3 complex, subunit 3, 21kDa	-1.11476	2.57113e-133
ENSG00000112186	CAP2	CAP, adenylate cyclase-associated protein, 2 (yeast)	-1.66024	0
ENSG00000129946	SHC2	SHC (Src homology 2 domain containing) transforming protein 2	-1.19285	2.04882e-05
ENSG00000116106	EPHA4	EPH receptor A4	-1.97762	3.25608e-78
ENSG00000125844	RRBP1	ribosome binding protein 1 homolog 180kDa (dog)	-1.24726	5.84051e-100
ENSG00000170703	TTLL6	tubulin tyrosine ligase-like family, member 6	-1.33265	9.81335e-05
ENSG00000168763	CNNM3	cyclin M3	-1.13011	1.49249e-279
ENSG00000184500	PROS1	protein S (alpha)	-1.69622	1.16113e-149
ENSG00000156804	FBXO32	F-box protein 32	-1.75573	5.29296e-234
ENSG00000117479	SLC19A2	solute carrier family 19 (thiamine transporter), member 2	-1.16871	4.60778e-138
ENSG00000137942	FNBP1L	formin binding protein 1-like	-1.11852	1.81634e-76
ENSG00000130429	ARPC1B	actin related protein 2/3 complex, subunit 1B, 41kDa	-1.48553	3.22177e-98
ENSG00000138646	HERC5	HECT and RLD domain containing E3 ubiquitin protein ligase 5	-1.36305	5.65759e-82
ENSG00000144837	PLA1A	phospholipase A1 member A	-2.057	0.00321902
ENSG00000143344	RGL1	ral guanine nucleotide dissociation stimulator-like 1	-3.43198	0
ENSG00000137337	MDC1	mediator of DNA-damage checkpoint 1	-1.00786	1.24261e-99
ENSG00000105612	DNASE2	deoxyribonuclease II, lysosomal	-1.88856	0
ENSG00000092421	SEMA6A	sema domain, transmembrane domain (TM), and cytoplasmic domain, (semaphorin) 6A	-3.11526	0
ENSG00000197106	SLC6A17	solute carrier family 6, member 17	-1.60484	0
ENSG00000179855	GIPC3	GIPC PDZ domain containing family, member 3	-2.66522	1.14032e-12
ENSG00000013563	DNASE1L1	deoxyribonuclease I-like 1	-1.39674	4.78223e-32
ENSG00000135677	GNS	glucosamine (N-acetyl)-6-sulfatase	-1.83745	0
ENSG00000196781	TLE1	transducin-like enhancer of split 1 (E(sp1) homolog, Drosophila)	-1.0387	4.4e-143
ENSG00000234745	HLA-B	major histocompatibility complex, class I, B	-1.18934	6.24885e-46
ENSG00000130956	HABP4	hyaluronan binding protein 4	-1.15656	3.03314e-118
ENSG00000099960	SLC7A4	solute carrier family 7 (orphan transporter), member 4	-1.36993	1.16622e-29
ENSG00000070214	SLC44A1	solute carrier family 44, member 1	-2.74115	0
ENSG00000154917	RAB6B	RAB6B, member RAS oncogene family	-1.31867	1.4953e-62
ENSG00000107104	KANK1	KN motif and ankyrin repeat domains 1	-1.46713	1.41496e-80
ENSG00000172578	KLHL6	kelch-like 6 (Drosophila)	-2.17845	1.39226e-285
ENSG00000065833	ME1	malic enzyme 1, NADP(+)-dependent, cytosolic	-1.28079	9.92285e-21
ENSG00000115648	MLPH	melanophilin	-2.15072	2.77993e-281
ENSG00000135090	TAOK3	TAO kinase 3	-2.12485	0
ENSG00000131473	ACLY	ATP citrate lyase	-1.07288	5.84569e-246
ENSG00000078295	ADCY2	adenylate cyclase 2 (brain)	-2.23552	6.98372e-217
ENSG00000156587	UBE2L6	ubiquitin-conjugating enzyme E2L 6	-2.65711	2.20334e-117
ENSG00000115474	KCNJ13	potassium inwardly-rectifying channel, subfamily J, member 13	-1.97018	1.77181e-06
ENSG00000187957	DNER	delta/notch-like EGF repeat containing	-5.09456	0
ENSG00000204186	ZDBF2	zinc finger, DBF-type containing 2	-1.92581	0
ENSG00000172572	PDE3A	phosphodiesterase 3A, cGMP-inhibited	-1.74271	1.14968e-138
ENSG00000197043	ANXA6	annexin A6	-2.34698	0
ENSG00000110693	SOX6	SRY (sex determining region Y)-box 6	-2.10182	1.28539e-90
ENSG00000229400	RP11-3L21.2		-3.20913	8.85259e-07
ENSG00000118508	RAB32	RAB32, member RAS oncogene family	-1.96338	2.98187e-142
ENSG00000131016	AKAP12	A kinase (PRKA) anchor protein 12	-1.51269	7.47834e-98
ENSG00000171608	PIK3CD	phosphatidylinositol-4,5-bisphosphate 3-kinase, catalytic subunit delta	-1.18296	3.82537e-106
ENSG00000166851	PLK1	polo-like kinase 1	-1.36344	7.83064e-132
ENSG00000126785	RHOJ	ras homolog family member J	-2.36523	1.46145e-280
ENSG00000143819	EPHX1	epoxide hydrolase 1, microsomal (xenobiotic)	-1.2605	9.21118e-64
ENSG00000117984	CTSD	cathepsin D	-1.77634	2.22527e-123
ENSG00000225968	ELFN1	extracellular leucine-rich repeat and fibronectin type III domain containing 1	-1.02795	0.0306672
ENSG00000110080	ST3GAL4	ST3 beta-galactoside alpha-2,3-sialyltransferase 4	-2.45506	0
ENSG00000249115	HAUS5	HAUS augmin-like complex, subunit 5	-1.30826	9.08073e-54
ENSG00000167280	ENGASE	endo-beta-N-acetylglucosaminidase	-1.4684	2.4557e-241
ENSG00000234323	RP11-308N19.1		-1.83862	1.1819e-15
ENSG00000106976	DNM1	dynamin 1	-3.62824	0
ENSG00000131873	CHSY1	chondroitin sulfate synthase 1	-1.70851	0
ENSG00000184588	PDE4B	phosphodiesterase 4B, cAMP-specific	-1.03362	1.60562e-94
ENSG00000136888	ATP6V1G1	ATPase, H+ transporting, lysosomal 13kDa, V1 subunit G1	-2.0602	0
ENSG00000166501	PRKCB	protein kinase C, beta	-4.3408	0
ENSG00000198722	UNC13B	unc-13 homolog B (C. elegans)	-1.11629	5.6137e-84
ENSG00000101224	CDC25B	cell division cycle 25 homolog B (S. pombe)	-1.75779	9.42764e-204
ENSG00000139173	TMEM117	transmembrane protein 117	-1.87369	1.66009e-147
ENSG00000110090	CPT1A	carnitine palmitoyltransferase 1A (liver)	-1.01757	1.48509e-54
ENSG00000101104	PABPC1L	poly(A) binding protein, cytoplasmic 1-like	-1.10459	2.98744e-49
ENSG00000168010	ATG16L2	autophagy related 16-like 2 (S. cerevisiae)	-3.24145	0
ENSG00000116016	EPAS1	endothelial PAS domain protein 1	-1.89847	0
ENSG00000114487	MORC1	MORC family CW-type zinc finger 1	-3.78417	0
ENSG00000006468	ETV1	ets variant 1	-1.73164	6.5023e-217
ENSG00000143669	LYST	lysosomal trafficking regulator	-1.5109	3.35272e-132
ENSG00000180818	HOXC10	homeobox C10	-1.65665	0.000309884
ENSG00000091490	SEL1L3	sel-1 suppressor of lin-12-like 3 (C. elegans)	-3.13879	0
ENSG00000145495	MARCH6	membrane-associated ring finger (C3HC4) 6, E3 ubiquitin protein ligase	-1.12702	2.97467e-164
ENSG00000124508	BTN2A2	butyrophilin, subfamily 2, member A2	-1.64249	0
ENSG00000081087	OSTM1	osteopetrosis associated transmembrane protein 1	-2.4212	0
ENSG00000125354	SEPT6	septin 6	-1.52357	3.48338e-281
ENSG00000158747	NBL1	neuroblastoma, suppression of tumorigenicity 1	-1.72262	2.47612e-116
ENSG00000204525	HLA-C	major histocompatibility complex, class I, C	-1.19475	6.62768e-70
ENSG00000173786	CNP	2',3'-cyclic nucleotide 3' phosphodiesterase	-1.1658	8.91348e-190
ENSG00000148429	USP6NL	USP6 N-terminal like	-1.53362	1.38373e-61
ENSG00000261827	RP11-340F14.5		-2.96854	4.22822e-32
ENSG00000179388	EGR3	early growth response 3	-1.77809	1.53399e-32
ENSG00000262877	RP11-1055B8.4		-1.67397	1.32164e-134
ENSG00000197971	MBP	myelin basic protein	-1.91271	5.02185e-84
ENSG00000228594	C1orf233	chromosome 1 open reading frame 233	-1.2137	2.37254e-21
ENSG00000197535	MYO5A	myosin VA (heavy chain 12, myoxin)	-1.34225	2.17967e-39
ENSG00000075151	EIF4G3	eukaryotic translation initiation factor 4 gamma, 3	-1.4654	1.67063e-201
ENSG00000070731	ST6GALNAC2	ST6 (alpha-N-acetyl-neuraminyl-2,3-beta-galactosyl-1,3)-N-acetylgalactosaminide alpha-2,6-sialyltransferase 2	-2.81558	1.04242e-214
ENSG00000205517	RGL3	ral guanine nucleotide dissociation stimulator-like 3	-2.90943	1.40772e-12
ENSG00000214922	HLA-F-AS1	HLA-F antisense RNA 1	-2.72091	0
ENSG00000189067	LITAF	lipopolysaccharide-induced TNF factor	-1.03226	1.74309e-223
ENSG00000137869	CYP19A1	cytochrome P450, family 19, subfamily A, polypeptide 1	-1.49782	3.97865e-23
ENSG00000140470	ADAMTS17	ADAM metallopeptidase with thrombospondin type 1 motif, 17	-1.13037	2.06671e-76
ENSG00000104324	CPQ	carboxypeptidase Q	-3.16827	5.56791e-201
ENSG00000140379	BCL2A1	BCL2-related protein A1	-4.10688	0
ENSG00000172340	SUCLG2	succinate-CoA ligase, GDP-forming, beta subunit	-2.595	0
ENSG00000133935	C14orf1	chromosome 14 open reading frame 1	-1.48507	3.29242e-105
ENSG00000239508	PLCH1-AS1	PLCH1 antisense RNA 1	-3.74518	3.74556e-174
ENSG00000215252	GOLGA8B	golgin A8 family, member B	-1.01807	2.53947e-54
ENSG00000189057	FAM111B	family with sequence similarity 111, member B	-1.86463	5.94165e-62
ENSG00000120215	MLANA	melan-A	-3.10638	0
ENSG00000162341	TPCN2	two pore segment channel 2	-2.84671	0
ENSG00000139641	ESYT1	extended synaptotagmin-like protein 1	-1.20192	0
ENSG00000128245	YWHAH	tyrosine 3-monooxygenase/tryptophan 5-monooxygenase activation protein, eta polypeptide	-1.66198	0
ENSG00000122966	CIT	citron (rho-interacting, serine/threonine kinase 21)	-1.78553	1.21383e-218
ENSG00000137752	CASP1	caspase 1, apoptosis-related cysteine peptidase	-3.14885	2.47225e-08
ENSG00000151348	EXT2	exostosin 2	-1.41753	0
ENSG00000099953	MMP11	matrix metallopeptidase 11 (stromelysin 3)	-1.81233	1.04743e-14
ENSG00000137841	PLCB2	phospholipase C, beta 2	-4.76056	2.72804e-270
ENSG00000120049	KCNIP2	Kv channel interacting protein 2	-1.92465	3.71065e-191
ENSG00000261658	RP11-102F4.3		-2.39264	1.18415e-242
ENSG00000204128	C2orf72	chromosome 2 open reading frame 72	-3.20022	0
ENSG00000134222	PSRC1	proline/serine-rich coiled-coil 1	-1.36949	4.57432e-210
ENSG00000136868	SLC31A1	solute carrier family 31 (copper transporters), member 1	-1.50343	2.41951e-141
ENSG00000162599	NFIA	nuclear factor I/A	-1.18941	3.70205e-94
ENSG00000250378	RP11-119J18.1		-1.91048	1.37102e-14
ENSG00000141012	GALNS	galactosamine (N-acetyl)-6-sulfate sulfatase	-1.14759	2.98557e-119
ENSG00000163162	RNF149	ring finger protein 149	-1.34267	0
ENSG00000131730	CKMT2	creatine kinase, mitochondrial 2 (sarcomeric)	-1.96567	7.76069e-125
ENSG00000101384	JAG1	jagged 1	-1.20301	1.28418e-113
ENSG00000135931	ARMC9	armadillo repeat containing 9	-1.52558	4.49819e-125
ENSG00000152778	IFIT5	interferon-induced protein with tetratricopeptide repeats 5	-1.20171	2.2706e-46
ENSG00000197746	PSAP	prosaposin	-1.17703	1.14167e-185
ENSG00000242498	C15orf38	chromosome 15 open reading frame 38	-1.56046	6.04219e-06
ENSG00000162733	DDR2	discoidin domain receptor tyrosine kinase 2	-2.30006	2.57586e-73
ENSG00000130203	APOE	apolipoprotein E	-3.44941	0
ENSG00000168824	NSG1	Neuron-specific protein family member 1	-4.66275	0
ENSG00000103811	CTSH	cathepsin H	-1.65208	7.53138e-218
ENSG00000205476	CCDC85C	coiled-coil domain containing 85C	-1.46443	8.45835e-39
ENSG00000166979	FAM176C	family with sequence similarity 176, member C	-1.00799	2.00737e-25
ENSG00000100077	ADRBK2	adrenergic, beta, receptor kinase 2	-4.38116	0
ENSG00000137628	DDX60	DEAD (Asp-Glu-Ala-Asp) box polypeptide 60	-1.05723	1.03141e-09
ENSG00000178209	PLEC	plectin	-1.05087	3.71529e-295
ENSG00000154319	FAM167A	family with sequence similarity 167, member A	-3.66289	0
ENSG00000148180	GSN	gelsolin	-1.82383	0
ENSG00000108797	CNTNAP1	contactin associated protein 1	-1.40956	3.49493e-12
ENSG00000074181	NOTCH3	notch 3	-3.08897	3.37112e-243
ENSG00000187164	KIAA1598	KIAA1598	-2.98707	0
ENSG00000148834	GSTO1	glutathione S-transferase omega 1	-1.98621	0
ENSG00000213366	GSTM2	glutathione S-transferase mu 2 (muscle)	-1.45281	9.64195e-55
ENSG00000113368	LMNB1	lamin B1	-1.68161	1.41403e-77
ENSG00000134160	TRPM1	transient receptor potential cation channel, subfamily M, member 1	-3.37371	0
ENSG00000076706	MCAM	melanoma cell adhesion molecule	-2.88844	0
ENSG00000147862	NFIB	nuclear factor I/B	-1.50668	6.61439e-78
ENSG00000204264	PSMB8	proteasome (prosome, macropain) subunit, beta type, 8 (large multifunctional peptidase 7)	-1.41078	2.17221e-111
ENSG00000256043	CTSO	cathepsin O	-1.36058	1.37804e-46
ENSG00000135900	MRPL44	mitochondrial ribosomal protein L44	-1.22508	1.60857e-155
ENSG00000119514	GALNT12	UDP-N-acetyl-alpha-D-galactosamine:polypeptide N-acetylgalactosaminyltransferase 12 (GalNAc-T12)	-2.89103	7.20136e-59
ENSG00000075218	GTSE1	G-2 and S-phase expressed 1	-1.90891	1.12283e-267
ENSG00000213160	KLHL23	kelch-like 23 (Drosophila)	-1.51199	8.14715e-64
ENSG00000090316	MAEA	macrophage erythroblast attacher	-1.34932	1.99911e-182
ENSG00000141338	ABCA8	ATP-binding cassette, sub-family A (ABC1), member 8	-1.1389	8.02004e-23
ENSG00000141376	BCAS3	breast carcinoma amplified sequence 3	-1.69911	9.47768e-149
ENSG00000134138	MEIS2	Meis homeobox 2	-2.33193	8.17237e-149
ENSG00000254813	RP11-252C15.1		-2.37379	4.34427e-205
ENSG00000169084	DHRSX	dehydrogenase/reductase (SDR family) X-linked	-3.94558	2.10635e-157
ENSG00000178202	KDELC2	KDEL (Lys-Asp-Glu-Leu) containing 2	-1.33185	4.32405e-33
ENSG00000196743	GM2A	GM2 ganglioside activator	-1.06351	7.96088e-48
ENSG00000087258	GNAO1	guanine nucleotide binding protein (G protein), alpha activating activity polypeptide O	-2.36485	5.14421e-138
ENSG00000153208	MERTK	c-mer proto-oncogene tyrosine kinase	-1.76021	1.10098e-136
ENSG00000005108	THSD7A	thrombospondin, type I, domain containing 7A	-2.11864	3.20786e-20
ENSG00000121152	NCAPH	non-SMC condensin I complex, subunit H	-1.58521	3.73449e-132
ENSG00000167889	MGAT5B	mannosyl (alpha-1,6-)-glycoprotein beta-1,6-N-acetyl-glucosaminyltransferase, isozyme B	-3.07633	0
ENSG00000140939	NOL3	nucleolar protein 3 (apoptosis repressor with CARD domain)	-2.40517	3.09826e-291
ENSG00000163590	PPM1L	protein phosphatase, Mg2+/Mn2+ dependent, 1L	-1.07034	1.01253e-17
ENSG00000196116	TDRD7	tudor domain containing 7	-2.38287	2.09473e-187
ENSG00000215246	RP11-43F13.3		-1.97843	1.48756e-91
ENSG00000038382	TRIO	trio Rho guanine nucleotide exchange factor	-1.11038	6.95873e-233
ENSG00000170579	DLGAP1	discs, large (Drosophila) homolog-associated protein 1	-1.5892	5.30781e-93
ENSG00000117308	GALE	UDP-galactose-4-epimerase	-1.11423	1.31493e-116
ENSG00000114948	ADAM23	ADAM metallopeptidase domain 23	-1.77207	3.131e-131
ENSG00000176049	JAKMIP2	janus kinase and microtubule interacting protein 2	-2.7456	1.51232e-62
ENSG00000160746	ANO10	anoctamin 10	-1.25278	3.97428e-118
ENSG00000164104	HMGB2	high mobility group box 2	-1.03705	1.50246e-108
ENSG00000167740	CYB5D2	cytochrome b5 domain containing 2	-1.63805	2.78022e-70
ENSG00000237649	KIFC1	kinesin family member C1	-1.05125	3.261e-108
ENSG00000204103	MAFB	v-maf musculoaponeurotic fibrosarcoma oncogene homolog B (avian)	-1.92729	1.94467e-65
ENSG00000136478	TEX2	testis expressed 2	-1.11586	1.74075e-66
ENSG00000169174	PCSK9	proprotein convertase subtilisin/kexin type 9	-3.60333	0
ENSG00000110811	LEPREL2	leprecan-like 2	-1.03478	8.23219e-59
ENSG00000139178	C1RL	complement component 1, r subcomponent-like	-2.08149	4.35894e-14
ENSG00000136205	TNS3	tensin 3	-2.43383	1.60944e-175
ENSG00000253846	PCDHGA10	protocadherin gamma subfamily A, 10	-1.15415	1.64216e-05
ENSG00000183150	GPR19	G protein-coupled receptor 19	-1.15395	1.72345e-37
ENSG00000114859	CLCN2	chloride channel, voltage-sensitive 2	-1.33936	2.16872e-72
ENSG00000168843	FSTL5	follistatin-like 5	-1.72546	1.96977e-37
ENSG00000149289	ZC3H12C	zinc finger CCCH-type containing 12C	-1.55775	2.07953e-50
ENSG00000169814	BTD	biotinidase	-1.07468	2.22736e-41
ENSG00000123240	OPTN	optineurin	-1.26558	3.3021e-121
ENSG00000253522	hsa-mir-146a	hsa-mir-146a	-1.74097	0
ENSG00000165105	RASEF	RAS and EF-hand domain containing	-1.94538	1.03998e-113
ENSG00000082196	C1QTNF3	C1q and tumor necrosis factor related protein 3	-1.56361	1.70925e-94
ENSG00000174705	SH3PXD2B	SH3 and PX domains 2B	-1.8509	0
ENSG00000152217	SETBP1	SET binding protein 1	-2.004	0
ENSG00000265992	ESRG	embryonic stem cell related (non-protein coding)	-1.50819	2.90027e-38
ENSG00000157388	CACNA1D	calcium channel, voltage-dependent, L type, alpha 1D subunit	-3.00173	3.14528e-47
ENSG00000155252	PI4K2A	phosphatidylinositol 4-kinase type 2 alpha	-1.27777	0
ENSG00000186063	AIDA	axin interactor, dorsalization associated	-1.97807	7.1626e-286
ENSG00000101680	LAMA1	laminin, alpha 1	-1.74801	3.26314e-205
ENSG00000101004	NINL	ninein-like	-2.27427	2.18279e-13
ENSG00000138623	SEMA7A	semaphorin 7A, GPI membrane anchor (John Milton Hagen blood group)	-1.77052	7.66898e-146
ENSG00000166833	NAV2	neuron navigator 2	-1.45216	4.54806e-79
ENSG00000141429	GALNT1	UDP-N-acetyl-alpha-D-galactosamine:polypeptide N-acetylgalactosaminyltransferase 1 (GalNAc-T1)	-1.98383	0
ENSG00000071242	RPS6KA2	ribosomal protein S6 kinase, 90kDa, polypeptide 2	-1.5789	2.90208e-66
ENSG00000115339	GALNT3	UDP-N-acetyl-alpha-D-galactosamine:polypeptide N-acetylgalactosaminyltransferase 3 (GalNAc-T3)	-2.2597	1.3578e-52
ENSG00000011258	MBTD1	mbt domain containing 1	-1.03163	7.22036e-128
ENSG00000127863	TNFRSF19	tumor necrosis factor receptor superfamily, member 19	-3.96351	0
ENSG00000182901	RGS7	regulator of G-protein signaling 7	-3.85629	9.84341e-186
ENSG00000099219	ERMP1	endoplasmic reticulum metallopeptidase 1	-2.49356	3.70163e-225
ENSG00000100982	PCIF1	PDX1 C-terminal inhibiting factor 1	-2.46667	2.36388e-283
ENSG00000087077	TRIP6	thyroid hormone receptor interactor 6	-1.30729	1.21674e-71
ENSG00000198715	C1orf85	chromosome 1 open reading frame 85	-2.46022	0
ENSG00000054690	PLEKHH1	pleckstrin homology domain containing, family H (with MyTH4 domain) member 1	-1.32224	4.53851e-59
ENSG00000144218	AFF3	AF4/FMR2 family, member 3	-1.01818	1.33543e-23
ENSG00000158022	TRIM63	tripartite motif containing 63, E3 ubiquitin protein ligase	-3.38984	0
ENSG00000072121	ZFYVE26	zinc finger, FYVE domain containing 26	-1.40577	0
ENSG00000166436	TRIM66	tripartite motif containing 66	-1.90864	1.84038e-242
ENSG00000157538	DSCR3	Down syndrome critical region gene 3	-1.62223	0
ENSG00000205786	AC002511.4	Uncharacterized protein; cDNA FLJ46220 fis, clone TESTI4013774	-3.08422	4.03291e-117
ENSG00000031081	ARHGAP31	Rho GTPase activating protein 31	-2.49462	0
ENSG00000035403	VCL	vinculin	-1.52436	1.80603e-219
ENSG00000135862	LAMC1	laminin, gamma 1 (formerly LAMB2)	-1.60127	4.55139e-175
ENSG00000105613	MAST1	microtubule associated serine/threonine kinase 1	-2.25457	6.11664e-223
ENSG00000167011	NAT16	N-acetyltransferase 16 (GCN5-related, putative)	-4.29585	0
ENSG00000188522	FAM83G	family with sequence similarity 83, member G	-2.48107	1.3784e-31
ENSG00000086159	AQP6	aquaporin 6, kidney specific	-2.36851	4.94192e-170
ENSG00000143149	ALDH9A1	aldehyde dehydrogenase 9 family, member A1	-1.42651	1.14341e-88
ENSG00000137441	FGFBP2	fibroblast growth factor binding protein 2	-3.57718	5.06223e-163
ENSG00000167123	CERCAM	cerebral endothelial cell adhesion molecule	-1.58806	1.24029e-84
ENSG00000185070	FLRT2	fibronectin leucine rich transmembrane protein 2	-1.2777	1.68194e-140
ENSG00000170266	GLB1	galactosidase, beta 1	-1.08548	5.58521e-196
ENSG00000205444	RP4-529N6.1		-1.32272	7.3726e-69
ENSG00000167393	PPP2R3B	protein phosphatase 2, regulatory subunit B'', beta	-1.35864	1.19333e-184
ENSG00000105928	DFNA5	deafness, autosomal dominant 5	-1.28721	7.5054e-171
ENSG00000171621	SPSB1	splA/ryanodine receptor domain and SOCS box containing 1	-1.37443	1.78043e-152
ENSG00000122756	CNTFR	ciliary neurotrophic factor receptor	-4.723	7.15601e-221
ENSG00000187688	TRPV2	transient receptor potential cation channel, subfamily V, member 2	-1.68339	0
ENSG00000122574	WIPF3	WAS/WASL interacting protein family, member 3	-2.6744	1.87402e-28
ENSG00000214279	RP11-108K14.4	Putative scavenger receptor cysteine-rich domain-containing protein LOC619207	-3.79094	0
ENSG00000122778	KIAA1549	KIAA1549	-1.21758	1.95189e-121
ENSG00000047634	SCML1	sex comb on midleg-like 1 (Drosophila)	-1.58441	9.0451e-240
ENSG00000103647	CORO2B	coronin, actin binding protein, 2B	-2.11453	2.28598e-171
ENSG00000066056	TIE1	tyrosine kinase with immunoglobulin-like and EGF-like domains 1	-4.7531	9.55471e-237
ENSG00000126243	LRFN3	leucine rich repeat and fibronectin type III domain containing 3	-1.22719	4.22989e-15
ENSG00000179399	GPC5	glypican 5	-3.03018	8.46332e-251
ENSG00000136881	BAAT	bile acid CoA: amino acid N-acyltransferase (glycine N-choloyltransferase)	-1.17308	1.08721e-64
ENSG00000112902	SEMA5A	sema domain, seven thrombospondin repeats (type 1 and type 1-like), transmembrane domain (TM) and short cytoplasmic domain, (semaphorin) 5A	-5.50138	0
ENSG00000171611	PTCRA	pre T-cell antigen receptor alpha	-2.32185	1.61008e-24
ENSG00000184117	NIPSNAP1	nipsnap homolog 1 (C. elegans)	-1.70155	4.46985e-205
ENSG00000159348	CYB5R1	cytochrome b5 reductase 1	-1.22329	5.81391e-121
ENSG00000061337	LZTS1	leucine zipper, putative tumor suppressor 1	-1.38339	1.54019e-64
ENSG00000077498	TYR	tyrosinase (oculocutaneous albinism IA)	-4.05124	0
ENSG00000178814	OPLAH	5-oxoprolinase (ATP-hydrolysing)	-3.25112	0
ENSG00000105514	RAB3D	RAB3D, member RAS oncogene family	-2.11754	1.84149e-126
ENSG00000183876	ARSI	arylsulfatase family, member I	-3.30643	2.4982e-11
ENSG00000017797	RALBP1	ralA binding protein 1	-1.48792	0
ENSG00000088543	C3orf18	chromosome 3 open reading frame 18	-1.75861	5.2264e-102
ENSG00000196557	CACNA1H	calcium channel, voltage-dependent, T type, alpha 1H subunit	-3.17145	0
ENSG00000072042	RDH11	retinol dehydrogenase 11 (all-trans/9-cis/11-cis)	-1.08813	1.85224e-106
ENSG00000145284	SCD5	stearoyl-CoA desaturase 5	-1.63333	3.37923e-136
ENSG00000141527	CARD14	caspase recruitment domain family, member 14	-1.73433	8.04243e-48
ENSG00000115085	ZAP70	zeta-chain (TCR) associated protein kinase 70kDa	-1.9469	5.10102e-119
ENSG00000079616	KIF22	kinesin family member 22	-1.35017	9.34577e-96
ENSG00000143952	VPS54	vacuolar protein sorting 54 homolog (S. cerevisiae)	-1.01524	3.90422e-103
ENSG00000169231	THBS3	thrombospondin 3	-1.79461	0
ENSG00000100033	PRODH	proline dehydrogenase (oxidase) 1	-1.94143	1.83907e-234
ENSG00000104517	UBR5	ubiquitin protein ligase E3 component n-recognin 5	-1.13063	9.55554e-94
ENSG00000072840	EVC	Ellis van Creveld syndrome	-1.29514	4.66131e-32
ENSG00000196549	MME	membrane metallo-endopeptidase	-3.60479	0
ENSG00000102786	INTS6	integrator complex subunit 6	-1.11086	4.27335e-132
ENSG00000139531	SUOX	sulfite oxidase	-2.57998	0
ENSG00000168765	GSTM4	glutathione S-transferase mu 4	-2.66638	0
ENSG00000048991	R3HDM1	R3H domain containing 1	-1.66049	1.9378e-81
ENSG00000024526	DEPDC1	DEP domain containing 1	-1.83298	0
ENSG00000133121	STARD13	StAR-related lipid transfer (START) domain containing 13	-1.69197	4.27563e-284
ENSG00000006118	TMEM132A	transmembrane protein 132A	-1.54095	1.0645e-201
ENSG00000157657	ZNF618	zinc finger protein 618	-1.1553	5.3306e-55
ENSG00000095794	CREM	cAMP responsive element modulator	-1.05799	2.97237e-151
ENSG00000110917	MLEC	malectin	-1.4267	6.18979e-141
ENSG00000136574	GATA4	GATA binding protein 4	-1.72394	1.24906e-124
ENSG00000117676	RPS6KA1	ribosomal protein S6 kinase, 90kDa, polypeptide 1	-1.16923	2.89528e-84
ENSG00000073060	SCARB1	scavenger receptor class B, member 1	-1.43504	9.41594e-234
ENSG00000165312	OTUD1	OTU domain containing 1	-1.21706	3.49475e-121
ENSG00000141639	MAPK4	mitogen-activated protein kinase 4	-1.0921	5.62063e-42
ENSG00000170085	C5orf25	chromosome 5 open reading frame 25	-1.12787	3.82767e-15
ENSG00000171488	LRRC8C	leucine rich repeat containing 8 family, member C	-1.61031	1.69386e-125
ENSG00000091409	ITGA6	integrin, alpha 6	-1.12142	1.16093e-87
ENSG00000013583	HEBP1	heme binding protein 1	-1.701	3.10787e-73
ENSG00000150760	DOCK1	dedicator of cytokinesis 1	-2.01959	0
ENSG00000131711	MAP1B	microtubule-associated protein 1B	-2.42096	2.38554e-183
ENSG00000142173	COL6A2	collagen, type VI, alpha 2	-1.80757	8.35431e-54
ENSG00000185567	AHNAK2	AHNAK nucleoprotein 2	-3.80214	7.35848e-86
ENSG00000231811	RP3-527G5.1		-3.61515	9.24766e-118
ENSG00000023892	DEF6	differentially expressed in FDCP 6 homolog (mouse)	-2.06753	7.94567e-259
ENSG00000108039	XPNPEP1	X-prolyl aminopeptidase (aminopeptidase P) 1, soluble	-1.50035	3.26344e-131
ENSG00000133030	MPRIP	myosin phosphatase Rho interacting protein	-1.04022	9.19818e-76
ENSG00000122691	TWIST1	twist homolog 1 (Drosophila)	-1.12508	3.64908e-120
ENSG00000188643	S100A16	S100 calcium binding protein A16	-1.33734	2.90802e-61
ENSG00000196576	PLXNB2	plexin B2	-1.65761	4.28711e-160
ENSG00000137693	YAP1	Yes-associated protein 1	-1.29379	4.54353e-148
ENSG00000188002	RP11-43F13.1		-1.46322	4.87279e-82
ENSG00000157227	MMP14	matrix metallopeptidase 14 (membrane-inserted)	-1.38025	1.69184e-230
ENSG00000186897	C1QL4	complement component 1, q subcomponent-like 4	-1.37044	2.57368e-71
ENSG00000120725	SIL1	SIL1 homolog, endoplasmic reticulum chaperone (S. cerevisiae)	-1.22699	1.29375e-109
ENSG00000179218	CALR	calreticulin	-1.15677	2.04909e-84
ENSG00000163531	NFASC	neurofascin	-1.08705	4.745e-39
ENSG00000053108	FSTL4	follistatin-like 4	-2.81402	2.04486e-155
ENSG00000115194	SLC30A3	solute carrier family 30 (zinc transporter), member 3	-1.2147	1.00088e-46
ENSG00000235903	CPB2-AS1	CPB2 antisense RNA 1	-1.44595	2.62877e-37
ENSG00000116983	HPCAL4	hippocalcin like 4	-2.91444	1.59533e-197
ENSG00000158467	AHCYL2	adenosylhomocysteinase-like 2	-1.36488	1.02182e-117
ENSG00000204228	HSD17B8	hydroxysteroid (17-beta) dehydrogenase 8	-2.13681	1.28884e-152
ENSG00000089057	SLC23A2	solute carrier family 23 (nucleobase transporters), member 2	-1.32481	3.62452e-83
ENSG00000174021	GNG5	guanine nucleotide binding protein (G protein), gamma 5	-1.48129	2.49266e-230
ENSG00000113810	SMC4	structural maintenance of chromosomes 4	-1.95499	1.74384e-301
ENSG00000204060	FOXO6	forkhead box O6	-2.58634	1.18862e-238
ENSG00000077232	DNAJC10	DnaJ (Hsp40) homolog, subfamily C, member 10	-1.05496	2.338e-100
ENSG00000101198	NKAIN4	Na+/K+ transporting ATPase interacting 4	-2.24907	3.6091e-200
ENSG00000130529	TRPM4	transient receptor potential cation channel, subfamily M, member 4	-1.62998	2.51698e-79
ENSG00000107281	NPDC1	neural proliferation, differentiation and control, 1	-2.10182	8.89665e-57
ENSG00000204365	C10orf126	chromosome 10 open reading frame 126	-3.16207	1.01032e-262
ENSG00000131067	GGT7	gamma-glutamyltransferase 7	-1.7365	0
ENSG00000183621	ZNF438	zinc finger protein 438	-1.2227	3.4202e-62
ENSG00000166165	CKB	creatine kinase, brain	-2.41199	6.14267e-105
ENSG00000167895	TMC8	transmembrane channel-like 8	-1.1339	6.45832e-47
ENSG00000134508	CABLES1	Cdk5 and Abl enzyme substrate 1	-1.40924	1.32693e-43
ENSG00000164050	PLXNB1	plexin B1	-1.20172	6.04022e-149
ENSG00000124772	CPNE5	copine V	-1.8802	3.34573e-125
ENSG00000102003	SYP	synaptophysin	-1.9854	6.09167e-65
ENSG00000228203	RNF144A-AS1	RNF144A antisense RNA 1	-2.57433	1.85523e-218
ENSG00000187837	HIST1H1C	histone cluster 1, H1c	-2.51803	1.65104e-152
ENSG00000120256	LRP11	low density lipoprotein receptor-related protein 11	-2.90379	8.0112e-126
ENSG00000161996	WDR90	WD repeat domain 90	-1.0875	2.13231e-43
ENSG00000004399	PLXND1	plexin D1	-2.1935	4.18243e-129
ENSG00000077063	CTTNBP2	cortactin binding protein 2	-1.63217	1.90156e-28
ENSG00000152932	RAB3C	RAB3C, member RAS oncogene family	-1.18671	6.89993e-68
ENSG00000178104	PDE4DIP	phosphodiesterase 4D interacting protein	-1.16158	1.29541e-72
ENSG00000116833	NR5A2	nuclear receptor subfamily 5, group A, member 2	-3.12143	1.30659e-182
ENSG00000125827	TMX4	thioredoxin-related transmembrane protein 4	-2.75557	0
ENSG00000135097	MSI1	musashi homolog 1 (Drosophila)	-1.16727	3.54397e-117
ENSG00000011028	MRC2	mannose receptor, C type 2	-1.19976	0.00322671
ENSG00000203446	AC004988.1		-1.20631	6.18286e-105
ENSG00000144749	LRIG1	leucine-rich repeats and immunoglobulin-like domains 1	-1.00287	4.91805e-54
ENSG00000114626	ABTB1	ankyrin repeat and BTB (POZ) domain containing 1	-1.94536	1.69794e-150
ENSG00000114374	USP9Y	ubiquitin specific peptidase 9, Y-linked	-1.44465	3.41281e-114
ENSG00000143228	NUF2	NUF2, NDC80 kinetochore complex component, homolog (S. cerevisiae)	-2.14832	0
ENSG00000173805	HAP1	huntingtin-associated protein 1	-1.56896	1.45099e-68
ENSG00000005448	WDR54	WD repeat domain 54	-1.25317	1.16547e-129
ENSG00000186642	PDE2A	phosphodiesterase 2A, cGMP-stimulated	-1.66567	7.53556e-72
ENSG00000119321	FKBP15	FK506 binding protein 15, 133kDa	-1.32281	4.24044e-260
ENSG00000183688	FAM101B	family with sequence similarity 101, member B	-2.12255	4.03704e-193
ENSG00000184254	ALDH1A3	aldehyde dehydrogenase 1 family, member A3	-3.48651	6.28819e-17
ENSG00000196083	IL1RAP	interleukin 1 receptor accessory protein	-2.38215	0
ENSG00000072041	SLC6A15	solute carrier family 6 (neutral amino acid transporter), member 15	-2.97149	6.5191e-240
ENSG00000139974	SLC38A6	solute carrier family 38, member 6	-1.62742	7.57843e-133
ENSG00000084754	HADHA	hydroxyacyl-CoA dehydrogenase/3-ketoacyl-CoA thiolase/enoyl-CoA hydratase (trifunctional protein), alpha subunit	-2.04288	2.39897e-222
ENSG00000050130	JKAMP	JNK1/MAPK8-associated membrane protein	-1.27295	5.66173e-181
ENSG00000171729	TMEM51	transmembrane protein 51	-1.09362	1.47649e-70
ENSG00000064225	ST3GAL6	ST3 beta-galactoside alpha-2,3-sialyltransferase 6	-2.21429	1.95611e-145
ENSG00000118785	SPP1	secreted phosphoprotein 1	-1.02341	1.11577e-78
ENSG00000102048	ASB9	ankyrin repeat and SOCS box containing 9	-1.1987	3.81095e-59
ENSG00000068650	ATP11A	ATPase, class VI, type 11A	-1.03341	1.16022e-48
ENSG00000196502	SULT1A1	sulfotransferase family, cytosolic, 1A, phenol-preferring, member 1	-2.43327	2.15302e-20
ENSG00000163359	COL6A3	collagen, type VI, alpha 3	-4.16653	2.79919e-194
ENSG00000188467	SLC24A5	solute carrier family 24, member 5	-2.82554	2.65019e-144
ENSG00000173171	MTX1	metaxin 1	-1.44307	6.94136e-197
ENSG00000166793	YPEL4	yippee-like 4 (Drosophila)	-1.55862	8.48936e-150
ENSG00000183421	RIPK4	receptor-interacting serine-threonine kinase 4	-2.30726	0
ENSG00000050555	LAMC3	laminin, gamma 3	-1.89641	2.21737e-148
ENSG00000197892	KIF13B	kinesin family member 13B	-1.82596	3.17093e-233
ENSG00000152931	PART1	prostate androgen-regulated transcript 1 (non-protein coding)	-1.02724	1.73836e-14
ENSG00000187231	SESTD1	SEC14 and spectrin domains 1	-2.48701	6.69792e-206
ENSG00000068394	GPKOW	G patch domain and KOW motifs	-1.15737	3.74236e-120
ENSG00000174004	LRRC33	leucine rich repeat containing 33	-1.88602	1.79204e-44
ENSG00000011523	CEP68	centrosomal protein 68kDa	-1.66326	3.21284e-236
ENSG00000117899	MESDC2	mesoderm development candidate 2	-2.36704	0
ENSG00000215262	KCNU1	potassium channel, subfamily U, member 1	-2.58982	1.76243e-104
ENSG00000130208	APOC1	apolipoprotein C-I	-1.8061	4.14786e-85
ENSG00000122877	EGR2	early growth response 2	-1.50352	5.62616e-41
ENSG00000105011	ASF1B	ASF1 anti-silencing function 1 homolog B (S. cerevisiae)	-1.05569	1.4726e-40
ENSG00000122642	FKBP9	FK506 binding protein 9, 63 kDa	-1.56709	2.36025e-137
ENSG00000185989	RASA3	RAS p21 protein activator 3	-2.89643	0
ENSG00000153446	C16orf89	chromosome 16 open reading frame 89	-5.78356	3.02111e-150
ENSG00000134369	NAV1	neuron navigator 1	-2.50346	2.15537e-240
ENSG00000132323	ILKAP	integrin-linked kinase-associated serine/threonine phosphatase	-1.00588	5.47251e-121
ENSG00000133131	MORC4	MORC family CW-type zinc finger 4	-2.47686	5.99664e-122
ENSG00000166831	RBPMS2	RNA binding protein with multiple splicing 2	-3.08752	8.41044e-189
ENSG00000091136	LAMB1	laminin, beta 1	-1.2812	7.49721e-42
ENSG00000198223	CSF2RA	colony stimulating factor 2 receptor, alpha, low-affinity (granulocyte-macrophage)	-2.20477	4.31217e-273
ENSG00000007516	BAIAP3	BAI1-associated protein 3	-2.77852	3.59985e-82
ENSG00000136247	ZDHHC4	zinc finger, DHHC-type containing 4	-1.03422	8.55165e-116
ENSG00000164659	KIAA1324L	KIAA1324-like	-1.72415	1.99897e-139
ENSG00000205302	SNX2	sorting nexin 2	-1.04683	2.2035e-204
ENSG00000165671	NSD1	nuclear receptor binding SET domain protein 1	-1.22714	1.36885e-102
ENSG00000153071	DAB2	disabled homolog 2, mitogen-responsive phosphoprotein (Drosophila)	-1.3004	3.63976e-156
ENSG00000108001	EBF3	early B-cell factor 3	-2.14765	1.07223e-146
ENSG00000143801	PSEN2	presenilin 2 (Alzheimer disease 4)	-1.27601	8.97992e-135
ENSG00000143341	HMCN1	hemicentin 1	-2.64542	2.85502e-94
ENSG00000119729	RHOQ	ras homolog family member Q	-1.20778	1.44042e-69
ENSG00000117399	CDC20	cell division cycle 20 homolog (S. cerevisiae)	-1.05913	7.91209e-66
ENSG00000251364	CTD-2516F10.2		-1.515	1.00478e-32
ENSG00000090539	CHRD	chordin	-2.11161	5.27339e-90
ENSG00000134287	ARF3	ADP-ribosylation factor 3	-1.38752	1.75032e-187
ENSG00000180229	HERC2P3	hect domain and RLD 2 pseudogene 3	-1.32063	4.31105e-62
ENSG00000166278	C2	complement component 2	-2.18436	1.8484e-69
ENSG00000122367	LDB3	LIM domain binding 3	-4.21248	2.95467e-158
ENSG00000053524	MCF2L2	MCF.2 cell line derived transforming sequence-like 2	-1.58569	7.07852e-45
ENSG00000143514	TP53BP2	tumor protein p53 binding protein, 2	-1.08366	2.93909e-176
ENSG00000169129	AFAP1L2	actin filament associated protein 1-like 2	-1.46901	3.4442e-11
ENSG00000083067	TRPM3	transient receptor potential cation channel, subfamily M, member 3	-1.68555	2.16298e-47
ENSG00000013364	MVP	major vault protein	-1.85545	3.51104e-67
ENSG00000102038	SMARCA1	SWI/SNF related, matrix associated, actin dependent regulator of chromatin, subfamily a, member 1	-2.26373	5.94765e-130
ENSG00000084444	KIAA1467	KIAA1467	-1.17513	5.58068e-121
ENSG00000167670	CHAF1A	chromatin assembly factor 1, subunit A (p150)	-1.25105	4.97262e-168
ENSG00000186951	PPARA	peroxisome proliferator-activated receptor alpha	-1.02569	2.55886e-18
ENSG00000168280	KIF5C	kinesin family member 5C	-1.13647	1.30551e-28
ENSG00000139668	WDFY2	WD repeat and FYVE domain containing 2	-1.7912	2.51315e-205
ENSG00000174669	SLC29A2	solute carrier family 29 (nucleoside transporters), member 2	-1.08675	7.35947e-19
ENSG00000148288	GBGT1	globoside alpha-1,3-N-acetylgalactosaminyltransferase 1	-3.28809	5.3743e-12
ENSG00000135525	MAP7	microtubule-associated protein 7	-2.35712	5.68286e-104
ENSG00000230487	AC093734.11		-1.15892	5.05634e-18
ENSG00000112290	WASF1	WAS protein family, member 1	-1.99295	2.37576e-250
ENSG00000099399	MAGEB2	melanoma antigen family B, 2	-1.70305	0
ENSG00000217801	RP11-465B22.3		-1.7604	2.23637e-36
ENSG00000189362	TMEM194B	transmembrane protein 194B	-1.49137	2.91568e-122
ENSG00000012211	PRICKLE3	prickle homolog 3 (Drosophila)	-1.85217	1.65988e-136
ENSG00000084731	KIF3C	kinesin family member 3C	-1.01434	6.0897e-145
ENSG00000021826	CPS1	carbamoyl-phosphate synthase 1, mitochondrial	-3.15672	3.28614e-59
ENSG00000175643	RMI2	RMI2, RecQ mediated genome instability 2, homolog (S. cerevisiae)	-1.13239	3.75173e-31
ENSG00000104833	TUBB4A	tubulin, beta 4A class IVa	-1.9247	1.38963e-141
ENSG00000130294	KIF1A	kinesin family member 1A	-2.47054	1.4952e-75
ENSG00000087586	AURKA	aurora kinase A	-1.89323	0
ENSG00000181381	DDX60L	DEAD (Asp-Glu-Ala-Asp) box polypeptide 60-like	-1.45564	6.11363e-93
ENSG00000076716	GPC4	glypican 4	-1.54801	2.32134e-12
ENSG00000068024	HDAC4	histone deacetylase 4	-1.88119	1.9595e-109
ENSG00000124181	PLCG1	phospholipase C, gamma 1	-1.67985	0
ENSG00000120278	PLEKHG1	pleckstrin homology domain containing, family G (with RhoGef domain) member 1	-1.34857	2.3038e-46
ENSG00000134363	FST	follistatin	-1.01684	1.25028e-81
ENSG00000080298	RFX3	regulatory factor X, 3 (influences HLA class II expression)	-1.53843	7.65003e-96
ENSG00000114541	FRMD4B	FERM domain containing 4B	-3.32479	9.82633e-288
ENSG00000103051	COG4	component of oligomeric golgi complex 4	-1.31749	0
ENSG00000105699	LSR	lipolysis stimulated lipoprotein receptor	-1.2052	7.16183e-42
ENSG00000123453	SARDH	sarcosine dehydrogenase	-1.26524	0.0184061
ENSG00000146676	PURB	purine-rich element binding protein B	-1.42413	1.13071e-203
ENSG00000158458	NRG2	neuregulin 2	-1.79486	1.65713e-150
ENSG00000088280	ASAP3	ArfGAP with SH3 domain, ankyrin repeat and PH domain 3	-2.00368	9.62127e-171
ENSG00000167995	BEST1	bestrophin 1	-3.91461	1.39665e-260
ENSG00000105419	MEIS3	Meis homeobox 3	-1.36686	1.90248e-26
ENSG00000198691	ABCA4	ATP-binding cassette, sub-family A (ABC1), member 4	-1.99761	6.12113e-95
ENSG00000069974	RAB27A	RAB27A, member RAS oncogene family	-2.48934	2.67037e-193
ENSG00000173801	JUP	junction plakoglobin	-1.00795	1.76557e-79
ENSG00000232401	LINC00112	long intergenic non-protein coding RNA 112	-5.16509	0
ENSG00000014216	CAPN1	calpain 1, (mu/I) large subunit	-1.38328	1.07593e-74
ENSG00000158470	B4GALT5	UDP-Gal:betaGlcNAc beta 1,4- galactosyltransferase, polypeptide 5	-1.45883	2.63379e-174
ENSG00000131697	NPHP4	nephronophthisis 4	-1.58238	3.33914e-154
ENSG00000092020	PPP2R3C	protein phosphatase 2, regulatory subunit B'', gamma	-1.45844	8.00933e-189
ENSG00000163395	IGFN1	immunoglobulin-like and fibronectin type III domain containing 1	-4.05439	1.21213e-120
ENSG00000250571	GLI4	GLI family zinc finger 4	-1.18123	1.14159e-33
ENSG00000171310	CHST11	carbohydrate (chondroitin 4) sulfotransferase 11	-1.53271	1.54685e-233
ENSG00000135404	CD63	CD63 molecule	-2.28326	0
ENSG00000149218	ENDOD1	endonuclease domain containing 1	-1.64395	1.05987e-158
ENSG00000112655	PTK7	PTK7 protein tyrosine kinase 7	-2.05259	0
ENSG00000003989	SLC7A2	solute carrier family 7 (cationic amino acid transporter, y+ system), member 2	-1.70616	1.25318e-73
ENSG00000167191	GPRC5B	G protein-coupled receptor, family C, group 5, member B	-2.9308	0
ENSG00000129244	ATP1B2	ATPase, Na+/K+ transporting, beta 2 polypeptide	-2.5739	7.53835e-82
ENSG00000092969	TGFB2	transforming growth factor, beta 2	-1.9152	5.37531e-86
ENSG00000101098	RIMS4	regulating synaptic membrane exocytosis 4	-1.09463	3.24236e-21
ENSG00000131370	SH3BP5	SH3-domain binding protein 5 (BTK-associated)	-1.77853	1.19922e-84
ENSG00000203837	PNLIPRP3	pancreatic lipase-related protein 3	-3.92953	8.77838e-148
ENSG00000138777	PPA2	pyrophosphatase (inorganic) 2	-1.41523	7.26034e-92
ENSG00000130813	C19orf66	chromosome 19 open reading frame 66	-1.11187	7.56481e-63
ENSG00000155099	TMEM55A	transmembrane protein 55A	-2.09117	2.63538e-190
ENSG00000178028	DMAP1	DNA methyltransferase 1 associated protein 1	-1.20279	2.69308e-71
ENSG00000124217	MOCS3	molybdenum cofactor synthesis 3	-1.14293	3.65264e-87
ENSG00000167107	ACSF2	acyl-CoA synthetase family member 2	-2.74527	0
ENSG00000121207	LRAT	lecithin retinol acyltransferase (phosphatidylcholine--retinol O-acyltransferase)	-1.92769	3.26959e-69
ENSG00000129493	HEATR5A	HEAT repeat containing 5A	-1.4246	7.83778e-172
ENSG00000090097	PCBP4	poly(rC) binding protein 4	-2.33402	5.12502e-212
ENSG00000073578	SDHA	succinate dehydrogenase complex, subunit A, flavoprotein (Fp)	-1.22268	0
ENSG00000167074	TEF	thyrotrophic embryonic factor	-1.96291	6.51677e-249
ENSG00000257588	RP11-469H8.6		-3.17546	2.76249e-125
ENSG00000102189	EEA1	early endosome antigen 1	-1.06444	3.77808e-39
ENSG00000102054	RBBP7	retinoblastoma binding protein 7	-1.24197	1.55971e-164
ENSG00000127586	CHTF18	CTF18, chromosome transmission fidelity factor 18 homolog (S. cerevisiae)	-1.07244	9.34889e-51
ENSG00000073849	ST6GAL1	ST6 beta-galactosamide alpha-2,6-sialyltranferase 1	-2.56747	2.04646e-98
ENSG00000156970	BUB1B	budding uninhibited by benzimidazoles 1 homolog beta (yeast)	-1.17959	1.07668e-244
ENSG00000205269	TMEM170B	transmembrane protein 170B	-1.77394	1.96978e-164
ENSG00000170604	IRF2BP1	interferon regulatory factor 2 binding protein 1	-1.73604	2.26073e-89
ENSG00000151552	QDPR	quinoid dihydropteridine reductase	-1.02344	4.17e-38
ENSG00000149084	HSD17B12	hydroxysteroid (17-beta) dehydrogenase 12	-1.79556	5.62941e-115
ENSG00000132182	NUP210	nucleoporin 210kDa	-2.6306	0
ENSG00000134184	GSTM1	glutathione S-transferase mu 1	-3.06846	6.07827e-14
ENSG00000182256	GABRG3	gamma-aminobutyric acid (GABA) A receptor, gamma 3	-1.03961	1.55529e-08
ENSG00000143786	CNIH3	cornichon homolog 3 (Drosophila)	-1.82907	2.76469e-112
ENSG00000129173	E2F8	E2F transcription factor 8	-2.16394	2.77029e-94
ENSG00000198814	GK	glycerol kinase	-2.88707	0
ENSG00000137265	IRF4	interferon regulatory factor 4	-3.42725	3.93426e-137
ENSG00000148488	ST8SIA6	ST8 alpha-N-acetyl-neuraminide alpha-2,8-sialyltransferase 6	-1.45951	6.10701e-13
ENSG00000198108	CHSY3	chondroitin sulfate synthase 3	-3.32579	3.06332e-129
ENSG00000177614	PGBD5	piggyBac transposable element derived 5	-2.93648	1.8657e-60
ENSG00000119537	KDSR	3-ketodihydrosphingosine reductase	-1.17068	3.66844e-107
ENSG00000101558	VAPA	VAMP (vesicle-associated membrane protein)-associated protein A, 33kDa	-1.65795	0
ENSG00000177807	KCNJ10	potassium inwardly-rectifying channel, subfamily J, member 10	-3.1377	7.59833e-164
ENSG00000143776	CDC42BPA	CDC42 binding protein kinase alpha (DMPK-like)	-1.38394	8.26483e-89
ENSG00000169919	GUSB	glucuronidase, beta	-2.03899	0
ENSG00000073921	PICALM	phosphatidylinositol binding clathrin assembly protein	-1.26286	1.41541e-246
ENSG00000095383	TBC1D2	TBC1 domain family, member 2	-1.61056	5.81338e-166
ENSG00000049245	VAMP3	vesicle-associated membrane protein 3 (cellubrevin)	-1.84043	0
ENSG00000137135	ARHGEF39	Rho guanine nucleotide exchange factor (GEF) 39	-1.65485	2.22324e-96
ENSG00000065320	NTN1	netrin 1	-1.48605	2.78298e-88
ENSG00000184640	SEPT9	septin 9	-1.10953	2.43089e-276
ENSG00000221963	APOL6	apolipoprotein L, 6	-1.58835	7.05954e-23
ENSG00000250991	MICE	MHC class I polypeptide-related sequence E (pseudogene)	-2.86008	6.31705e-141
ENSG00000132383	RPA1	replication protein A1, 70kDa	-1.14049	5.05089e-155
ENSG00000086232	EIF2AK1	eukaryotic translation initiation factor 2-alpha kinase 1	-1.20653	6.86972e-295
ENSG00000110900	TSPAN11	tetraspanin 11	-1.53415	0.00661924
ENSG00000138375	SMARCAL1	SWI/SNF related, matrix associated, actin dependent regulator of chromatin, subfamily a-like 1	-1.11506	4.01478e-99
ENSG00000249937	RP11-454P21.1		-3.30595	6.41021e-275
ENSG00000198612	COPS8	COP9 constitutive photomorphogenic homolog subunit 8 (Arabidopsis)	-1.82366	0
ENSG00000163644	PPM1K	protein phosphatase, Mg2+/Mn2+ dependent, 1K	-1.22893	4.15789e-50
ENSG00000148700	ADD3	adducin 3 (gamma)	-1.93902	2.61932e-81
ENSG00000127022	CANX	calnexin	-1.52199	8.68307e-188
ENSG00000101190	TCFL5	transcription factor-like 5 (basic helix-loop-helix)	-1.24571	1.3897e-47
ENSG00000181264	TMEM136	transmembrane protein 136	-1.08775	1.93533e-113
ENSG00000100207	TCF20	transcription factor 20 (AR1)	-1.00394	1.8777e-96
ENSG00000163521	GLB1L	galactosidase, beta 1-like	-2.00079	1.47289e-226
ENSG00000137575	SDCBP	syndecan binding protein (syntenin)	-2.3402	0
ENSG00000147509	RGS20	regulator of G-protein signaling 20	-1.71827	2.265e-208
ENSG00000168496	FEN1	flap structure-specific endonuclease 1	-1.22236	8.60344e-80
ENSG00000100116	GCAT	glycine C-acetyltransferase	-1.12731	9.01143e-55
ENSG00000124920	C11orf9	chromosome 11 open reading frame 9	-1.66702	1.64777e-128
ENSG00000198420	FAM115A	family with sequence similarity 115, member A	-2.79218	0
ENSG00000144847	IGSF11	immunoglobulin superfamily, member 11	-2.52269	2.77053e-183
ENSG00000163535	SGOL2	shugoshin-like 2 (S. pombe)	-1.44856	1.15531e-64
ENSG00000117298	ECE1	endothelin converting enzyme 1	-2.48048	0
ENSG00000099194	SCD	stearoyl-CoA desaturase (delta-9-desaturase)	-3.77901	0
ENSG00000107242	PIP5K1B	phosphatidylinositol-4-phosphate 5-kinase, type I, beta	-1.55459	4.05017e-30
ENSG00000138346	DNA2	DNA replication helicase 2 homolog (yeast)	-1.02009	1.70665e-65
ENSG00000148660	CAMK2G	calcium/calmodulin-dependent protein kinase II gamma	-1.35342	1.97663e-175
ENSG00000169855	ROBO1	roundabout, axon guidance receptor, homolog 1 (Drosophila)	-1.06837	9.40602e-50
ENSG00000243244	STON1	stonin 1	-2.43858	4.39631e-207
ENSG00000094755	GABRP	gamma-aminobutyric acid (GABA) A receptor, pi	-1.77998	6.80156e-30
ENSG00000188313	PLSCR1	phospholipid scramblase 1	-1.33497	5.86109e-158
ENSG00000197081	IGF2R	insulin-like growth factor 2 receptor	-1.15223	1.57547e-99
ENSG00000243279	PRAF2	PRA1 domain family, member 2	-1.45608	2.96272e-149
ENSG00000111961	SASH1	SAM and SH3 domain containing 1	-1.15137	2.01262e-69
ENSG00000125089	SH3TC1	SH3 domain and tetratricopeptide repeats 1	-2.93232	0
ENSG00000128394	APOBEC3F	apolipoprotein B mRNA editing enzyme, catalytic polypeptide-like 3F	-1.43542	1.22653e-06
ENSG00000168118	RAB4A	RAB4A, member RAS oncogene family	-1.11244	5.7483e-44
ENSG00000175455	CCDC14	coiled-coil domain containing 14	-1.09622	1.69523e-95
ENSG00000125484	GTF3C4	general transcription factor IIIC, polypeptide 4, 90kDa	-1.11171	0
ENSG00000001617	SEMA3F	sema domain, immunoglobulin domain (Ig), short basic domain, secreted, (semaphorin) 3F	-3.23339	6.2178e-111
ENSG00000119632	IFI27L2	interferon, alpha-inducible protein 27-like 2	-1.13959	1.80483e-55
ENSG00000179403	VWA1	von Willebrand factor A domain containing 1	-2.32397	5.2128e-248
ENSG00000197142	ACSL5	acyl-CoA synthetase long-chain family member 5	-2.49664	3.55809e-87
ENSG00000088325	TPX2	TPX2, microtubule-associated, homolog (Xenopus laevis)	-1.67542	2.97212e-215
ENSG00000102125	TAZ	tafazzin	-1.67788	0
ENSG00000134324	LPIN1	lipin 1	-1.91946	9.01149e-305
ENSG00000090266	NDUFB2	NADH dehydrogenase (ubiquinone) 1 beta subcomplex, 2, 8kDa	-1.58576	2.74738e-249
ENSG00000122862	SRGN	serglycin	-2.06163	5.14466e-06
ENSG00000158555	GDPD5	glycerophosphodiester phosphodiesterase domain containing 5	-1.95414	3.56497e-181
ENSG00000169908	TM4SF1	transmembrane 4 L six family member 1	-3.29818	2.40669e-72
ENSG00000128709	HOXD9	homeobox D9	-1.4752	0.00219641
ENSG00000142920	ADC	arginine decarboxylase	-1.00876	2.50541e-108
ENSG00000196663	TECPR2	tectonin beta-propeller repeat containing 2	-1.06295	8.134e-76
ENSG00000175274	TP53I11	tumor protein p53 inducible protein 11	-4.05463	2.54555e-22
ENSG00000158669	AGPAT6	1-acylglycerol-3-phosphate O-acyltransferase 6 (lysophosphatidic acid acyltransferase, zeta)	-1.09673	8.05174e-151
ENSG00000236824	BCYRN1	brain cytoplasmic RNA 1	-1.14291	1.99979e-33
ENSG00000242110	AMACR	alpha-methylacyl-CoA racemase	-1.01218	1.80076e-25
ENSG00000134278	SPIRE1	spire homolog 1 (Drosophila)	-1.31372	2.58622e-50
ENSG00000125746	EML2	echinoderm microtubule associated protein like 2	-1.13709	3.35734e-79
ENSG00000005513	SOX8	SRY (sex determining region Y)-box 8	-3.62481	2.32119e-145
ENSG00000099889	ARVCF	armadillo repeat gene deleted in velocardiofacial syndrome	-1.31931	1.15072e-59
ENSG00000157077	ZFYVE9	zinc finger, FYVE domain containing 9	-1.20997	2.52631e-59
ENSG00000160678	S100A1	S100 calcium binding protein A1	-3.35689	0
ENSG00000206190	ATP10A	ATPase, class V, type 10A	-3.90222	0
ENSG00000188517	COL25A1	collagen, type XXV, alpha 1	-1.9603	2.16547e-39
ENSG00000218336	ODZ3	odz, odd Oz/ten-m homolog 3 (Drosophila)	-1.07884	2.81476e-65
ENSG00000143061	IGSF3	immunoglobulin superfamily, member 3	-3.56224	0
ENSG00000120162	MOB3B	MOB kinase activator 3B	-1.10349	1.96082e-22
ENSG00000179044	EXOC3L1	exocyst complex component 3-like 1	-7.33442	1.37792e-114
ENSG00000139915	MDGA2	MAM domain containing glycosylphosphatidylinositol anchor 2	-1.07463	4.45973e-21
ENSG00000135596	MICAL1	microtubule associated monoxygenase, calponin and LIM domain containing 1	-2.17599	0
ENSG00000105929	ATP6V0A4	ATPase, H+ transporting, lysosomal V0 subunit a4	-2.90744	5.56984e-114
ENSG00000085999	RAD54L	RAD54-like (S. cerevisiae)	-1.00485	5.97883e-32
ENSG00000184897	H1FX	H1 histone family, member X	-1.07966	1.74392e-59
ENSG00000115756	HPCAL1	hippocalcin-like 1	-1.68179	6.46146e-265
ENSG00000203999	RP11-290F20.1		-1.00659	7.53124e-28
ENSG00000113494	PRLR	prolactin receptor	-3.37179	1.07828e-78
ENSG00000179295	PTPN11	protein tyrosine phosphatase, non-receptor type 11	-1.94102	5.53944e-273
ENSG00000232053	AC009784.3		-1.00901	2.07698e-19
ENSG00000160049	DFFA	DNA fragmentation factor, 45kDa, alpha polypeptide	-1.13266	3.12385e-194
ENSG00000183048	SLC25A10	solute carrier family 25 (mitochondrial carrier; dicarboxylate transporter), member 10	-1.84472	1.18425e-66
ENSG00000198589	LRBA	LPS-responsive vesicle trafficking, beach and anchor containing	-1.21027	3.8812e-56
ENSG00000105854	PON2	paraoxonase 2	-1.0358	3.40269e-84
ENSG00000169241	SLC50A1	solute carrier family 50 (sugar transporter), member 1	-1.19707	1.83302e-116
ENSG00000149260	CAPN5	calpain 5	-2.17159	3.53612e-272
ENSG00000145217	SLC26A1	solute carrier family 26 (sulfate transporter), member 1	-3.11918	3.7664e-192
ENSG00000169567	HINT1	histidine triad nucleotide binding protein 1	-2.13055	1.28001e-267
ENSG00000127946	HIP1	huntingtin interacting protein 1	-1.40765	3.38739e-62
ENSG00000164733	CTSB	cathepsin B	-1.8464	4.61616e-193
ENSG00000117643	MAN1C1	mannosidase, alpha, class 1C, member 1	-2.64287	3.27062e-108
ENSG00000102109	PCSK1N	proprotein convertase subtilisin/kexin type 1 inhibitor	-1.32461	3.30421e-118
ENSG00000169393	ELSPBP1	epididymal sperm binding protein 1	-1.78625	0.0303927
ENSG00000130584	ZBTB46	zinc finger and BTB domain containing 46	-1.05261	1.00549e-25
ENSG00000116852	KIF21B	kinesin family member 21B	-1.74856	3.37095e-66
ENSG00000205464	ATP6AP1L	ATPase, H+ transporting, lysosomal accessory protein 1-like	-1.99763	7.58463e-70
ENSG00000155097	ATP6V1C1	ATPase, H+ transporting, lysosomal 42kDa, V1 subunit C1	-2.03597	0
ENSG00000138593	SECISBP2L	SECIS binding protein 2-like	-1.02127	6.09147e-40
ENSG00000104812	GYS1	glycogen synthase 1 (muscle)	-1.20551	5.65397e-206
ENSG00000261195	CTD-2380F24.1		-2.2306	5.68068e-21
ENSG00000136827	TOR1A	torsin family 1, member A (torsin A)	-1.24338	2.00072e-159
ENSG00000136842	TMOD1	tropomodulin 1	-2.08905	1.40905e-57
ENSG00000166961	MS4A15	membrane-spanning 4-domains, subfamily A, member 15	-1.17478	9.25885e-93
ENSG00000160200	CBS	cystathionine-beta-synthase	-1.78967	1.2417e-88
ENSG00000076356	PLXNA2	plexin A2	-2.50447	7.67986e-217
ENSG00000087008	ACOX3	acyl-CoA oxidase 3, pristanoyl	-1.13265	2.38909e-86
ENSG00000132405	TBC1D14	TBC1 domain family, member 14	-1.57872	0
ENSG00000160194	NDUFV3	NADH dehydrogenase (ubiquinone) flavoprotein 3, 10kDa	-1.21907	8.83348e-105
ENSG00000249328	RP11-26J3.1		-2.19809	4.10547e-60
ENSG00000172497	ACOT12	acyl-CoA thioesterase 12	-1.31814	4.99951e-28
ENSG00000204681	GABBR1	gamma-aminobutyric acid (GABA) B receptor, 1	-1.98752	0
ENSG00000164190	NIPBL	Nipped-B homolog (Drosophila)	-1.09047	3.37602e-172
ENSG00000124785	NRN1	neuritin 1	-1.91201	8.29814e-288
ENSG00000154646	TMPRSS15	transmembrane protease, serine 15	-1.31806	6.32746e-37
ENSG00000137501	SYTL2	synaptotagmin-like 2	-1.47702	0
ENSG00000142892	PIGK	phosphatidylinositol glycan anchor biosynthesis, class K	-1.47667	5.57342e-162
ENSG00000018510	AGPS	alkylglycerone phosphate synthase	-1.09141	1.14827e-65
ENSG00000171703	TCEA2	transcription elongation factor A (SII), 2	-1.0119	6.98371e-29
ENSG00000161542	PRPSAP1	phosphoribosyl pyrophosphate synthetase-associated protein 1	-1.3143	9.05185e-255
ENSG00000100504	PYGL	phosphorylase, glycogen, liver	-1.92476	3.09487e-285
ENSG00000141258	SGSM2	small G protein signaling modulator 2	-1.76415	6.60997e-262
ENSG00000167535	CACNB3	calcium channel, voltage-dependent, beta 3 subunit	-1.22721	2.67363e-77
ENSG00000123983	ACSL3	acyl-CoA synthetase long-chain family member 3	-2.23258	8.31459e-186
ENSG00000129757	CDKN1C	cyclin-dependent kinase inhibitor 1C (p57, Kip2)	-4.20117	1.16345e-269
ENSG00000074416	MGLL	monoglyceride lipase	-1.48337	2.02582e-12
ENSG00000185269	NOTUM	notum pectinacetylesterase homolog (Drosophila)	-1.52779	1.85665e-45
ENSG00000258484	SPESP1	sperm equatorial segment protein 1	-2.66938	7.41168e-191
ENSG00000106771	TMEM245	transmembrane protein 245	-1.50214	1.19655e-93
ENSG00000173085	COQ2	coenzyme Q2 homolog, prenyltransferase (yeast)	-1.32275	4.79936e-37
ENSG00000052802	MSMO1	methylsterol monooxygenase 1	-1.4613	2.03123e-153
ENSG00000172869	DMXL1	Dmx-like 1	-1.3947	4.28928e-81
ENSG00000167964	RAB26	RAB26, member RAS oncogene family	-3.09904	8.92252e-59
ENSG00000244486	SCARF2	scavenger receptor class F, member 2	-1.00584	1.32191e-72
ENSG00000091947	TMEM101	transmembrane protein 101	-1.58	1.908e-104
ENSG00000167291	TBC1D16	TBC1 domain family, member 16	-1.02679	2.79445e-47
ENSG00000182796	TMEM198B	transmembrane protein 198B, pseudogene	-1.50093	8.94215e-101
ENSG00000197748	WDR96	WD repeat domain 96	-1.31854	8.7007e-37
ENSG00000172830	SSH3	slingshot homolog 3 (Drosophila)	-2.20971	1.33475e-124
ENSG00000185104	FAF1	Fas (TNFRSF6) associated factor 1	-1.31559	2.68727e-177
ENSG00000245526	LINC00461	long intergenic non-protein coding RNA 461	-1.41765	2.82699e-63
ENSG00000104412	EMC2	ER membrane protein complex subunit 2	-1.48564	1.49641e-157
ENSG00000198963	RORB	RAR-related orphan receptor B	-3.52301	4.67681e-147
ENSG00000166881	TMEM194A	transmembrane protein 194A	-1.04822	6.49863e-134
ENSG00000106780	MEGF9	multiple EGF-like-domains 9	-1.06446	8.66871e-113
ENSG00000172197	MBOAT1	membrane bound O-acyltransferase domain containing 1	-1.55056	1.08776e-101
ENSG00000145536	ADAMTS16	ADAM metallopeptidase with thrombospondin type 1 motif, 16	-1.75609	1.85458e-30
ENSG00000138592	USP8	ubiquitin specific peptidase 8	-1.26808	5.95614e-255
ENSG00000108849	PPY	pancreatic polypeptide	-1.33909	4.50557e-38
ENSG00000013810	TACC3	transforming, acidic coiled-coil containing protein 3	-1.02423	2.08703e-54
ENSG00000115919	KYNU	kynureninase	-1.36106	0.00447997
ENSG00000128917	DLL4	delta-like 4 (Drosophila)	-1.08627	9.34655e-26
ENSG00000114270	COL7A1	collagen, type VII, alpha 1	-1.13433	3.82156e-18
ENSG00000079459	FDFT1	farnesyl-diphosphate farnesyltransferase 1	-1.72502	1.02795e-158
ENSG00000114279	FGF12	fibroblast growth factor 12	-4.1288	2.61621e-298
ENSG00000197415	VEPH1	ventricular zone expressed PH domain homolog 1 (zebrafish)	-2.78845	3.40691e-88
ENSG00000185885	IFITM1	interferon induced transmembrane protein 1	-1.4528	0.0333618
ENSG00000100344	PNPLA3	patatin-like phospholipase domain containing 3	-1.97888	2.80802e-152
ENSG00000226026	RP11-57H12.3		-1.48393	1.21527e-39
ENSG00000167004	PDIA3	protein disulfide isomerase family A, member 3	-2.90521	0
ENSG00000169891	REPS2	RALBP1 associated Eps domain containing 2	-1.91801	2.98467e-154
ENSG00000139567	ACVRL1	activin A receptor type II-like 1	-1.99473	0.000792403
ENSG00000147475	ERLIN2	ER lipid raft associated 2	-1.78121	0
ENSG00000140280	LYSMD2	LysM, putative peptidoglycan-binding, domain containing 2	-1.84571	7.64995e-62
ENSG00000106012	IQCE	IQ motif containing E	-1.8933	0
ENSG00000141576	RNF157	ring finger protein 157	-2.62827	2.22164e-260
ENSG00000198648	STK39	serine threonine kinase 39	-1.65407	1.32879e-69
ENSG00000147130	ZMYM3	zinc finger, MYM-type 3	-1.15378	3.75261e-148
ENSG00000119977	TCTN3	tectonic family member 3	-1.46068	7.91341e-183
ENSG00000154080	CHST9	carbohydrate (N-acetylgalactosamine 4-0) sulfotransferase 9	-2.65157	2.17647e-234
ENSG00000260267	RP11-452L6.5		-2.11079	5.43789e-65
ENSG00000181856	SLC2A4	solute carrier family 2 (facilitated glucose transporter), member 4	-2.54018	5.31046e-63
ENSG00000100150	DEPDC5	DEP domain containing 5	-1.06179	6.68118e-85
ENSG00000179029	TMEM107	transmembrane protein 107	-1.21391	3.8726e-91
ENSG00000127990	SGCE	sarcoglycan, epsilon	-1.02307	2.05053e-68
ENSG00000119927	GPAM	glycerol-3-phosphate acyltransferase, mitochondrial	-1.69653	6.08215e-99
ENSG00000157064	NMNAT2	nicotinamide nucleotide adenylyltransferase 2	-2.39721	1.97648e-60
ENSG00000051341	POLQ	polymerase (DNA directed), theta	-1.56123	6.56144e-64
ENSG00000211456	SACM1L	SAC1 suppressor of actin mutations 1-like (yeast)	-1.03978	2.21051e-97
ENSG00000158008	EXTL1	exostoses (multiple)-like 1	-2.87151	2.64451e-68
ENSG00000258616	RP11-369C8.1		-1.61921	5.85333e-26
ENSG00000104892	KLC3	kinesin light chain 3	-1.39819	4.68591e-26
ENSG00000104177	MYEF2	myelin expression factor 2	-1.67289	1.5638e-78
ENSG00000155970	EFHA2	EF-hand domain family, member A2	-1.30303	3.90294e-53
ENSG00000159788	RGS12	regulator of G-protein signaling 12	-1.96379	2.44293e-93
ENSG00000187773	FAM69C	family with sequence similarity 69, member C	-3.33198	9.6787e-28
ENSG00000104870	FCGRT	Fc fragment of IgG, receptor, transporter, alpha	-1.93916	1.96014e-18
ENSG00000137509	PRCP	prolylcarboxypeptidase (angiotensinase C)	-1.1587	2.15963e-245
ENSG00000235172	CTB-114C7.3		-1.88315	2.11356e-67
ENSG00000065882	TBC1D1	TBC1 (tre-2/USP6, BUB2, cdc16) domain family, member 1	-1.10495	1.23789e-65
ENSG00000125772	GPCPD1	glycerophosphocholine phosphodiesterase GDE1 homolog (S. cerevisiae)	-1.18421	2.76636e-35
ENSG00000101752	MIB1	mindbomb E3 ubiquitin protein ligase 1	-1.68141	3.29966e-170
ENSG00000092529	CAPN3	calpain 3, (p94)	-1.92757	1.55626e-81
ENSG00000101440	ASIP	agouti signaling protein	-2.39864	1.95809e-66
ENSG00000181378	CCDC108	coiled-coil domain containing 108	-2.11528	8.42852e-57
ENSG00000138101	DTNB	dystrobrevin, beta	-1.54234	9.08324e-108
ENSG00000126856	PRDM7	PR domain containing 7	-3.7727	0
ENSG00000132718	SYT11	synaptotagmin XI	-1.23647	5.16142e-193
ENSG00000139505	MTMR6	myotubularin related protein 6	-1.55884	1.33672e-165
ENSG00000005339	CREBBP	CREB binding protein	-1.00742	2.54007e-214
ENSG00000148730	EIF4EBP2	eukaryotic translation initiation factor 4E binding protein 2	-2.1629	0
ENSG00000181350	FAM211A	family with sequence similarity 211, member A	-2.19719	2.53205e-40
ENSG00000139163	ETNK1	ethanolamine kinase 1	-1.2156	3.89425e-108
ENSG00000234420	ZNF37BP	zinc finger protein 37B, pseudogene	-1.02263	3.56195e-75
ENSG00000008118	CAMK1G	calcium/calmodulin-dependent protein kinase IG	-1.95851	1.83973e-48
ENSG00000177697	CD151	CD151 molecule (Raph blood group)	-1.47164	1.23425e-84
ENSG00000177432	NAP1L5	nucleosome assembly protein 1-like 5	-1.74822	0
ENSG00000085063	CD59	CD59 molecule, complement regulatory protein	-2.01536	0
ENSG00000183248	AC010336.1	Protein FLJ22184	-2.14636	1.68959e-65
ENSG00000080511	RDH8	retinol dehydrogenase 8 (all-trans)	-1.84267	3.75963e-99
ENSG00000165102	HGSNAT	heparan-alpha-glucosaminide N-acetyltransferase	-1.53552	5.0318e-219
ENSG00000203386	AC009499.1		-1.02917	7.29812e-18
ENSG00000172037	LAMB2	laminin, beta 2 (laminin S)	-2.18072	0
ENSG00000093009	CDC45	cell division cycle 45 homolog (S. cerevisiae)	-1.08304	7.16687e-40
ENSG00000102878	HSF4	heat shock transcription factor 4	-2.48798	0
ENSG00000169604	ANTXR1	anthrax toxin receptor 1	-2.68912	0
ENSG00000159231	CBR3	carbonyl reductase 3	-2.64726	3.84819e-179
ENSG00000107140	TESK1	testis-specific kinase 1	-1.06054	2.49535e-34
ENSG00000082074	FYB	FYN binding protein	-1.30719	3.57271e-08
ENSG00000082146	STRADB	STE20-related kinase adaptor beta	-2.5241	2.18872e-183
ENSG00000130021	HDHD1	haloacid dehalogenase-like hydrolase domain containing 1	-1.45918	7.69491e-247
ENSG00000110880	CORO1C	coronin, actin binding protein, 1C	-1.78475	0
ENSG00000171119	NRTN	neurturin	-1.04419	2.16615e-15
ENSG00000258376	RP4-647C14.2		-1.29234	1.87682e-08
ENSG00000100297	MCM5	minichromosome maintenance complex component 5	-1.8114	4.93443e-103
ENSG00000214456	PLIN5	perilipin 5	-2.06211	6.46667e-46
ENSG00000125249	RAP2A	RAP2A, member of RAS oncogene family	-1.02989	1.16566e-36
ENSG00000072571	HMMR	hyaluronan-mediated motility receptor (RHAMM)	-3.16194	0
ENSG00000042493	CAPG	capping protein (actin filament), gelsolin-like	-2.60205	9.09219e-73
ENSG00000066084	DIP2B	DIP2 disco-interacting protein 2 homolog B (Drosophila)	-1.22337	2.82398e-60
ENSG00000116641	DOCK7	dedicator of cytokinesis 7	-1.47395	8.80069e-98
ENSG00000167536	DHRS13	dehydrogenase/reductase (SDR family) member 13	-1.07027	3.50133e-40
ENSG00000173926	MARCH3	membrane-associated ring finger (C3HC4) 3, E3 ubiquitin protein ligase	-1.39706	3.52643e-35
ENSG00000171604	CXXC5	CXXC finger protein 5	-1.78821	5.3982e-240
ENSG00000174083	PIK3R6	phosphoinositide-3-kinase, regulatory subunit 6	-2.93923	3.68345e-90
ENSG00000181192	DHTKD1	dehydrogenase E1 and transketolase domain containing 1	-2.27128	6.27357e-305
ENSG00000161798	AQP5	aquaporin 5	-2.54039	5.834e-54
ENSG00000058335	RASGRF1	Ras protein-specific guanine nucleotide-releasing factor 1	-1.63196	1.46886e-36
ENSG00000169372	CRADD	CASP2 and RIPK1 domain containing adaptor with death domain	-1.68694	8.31825e-46
ENSG00000119333	WDR34	WD repeat domain 34	-1.49737	6.71176e-56
ENSG00000129951	hsa-mir-3187	hsa-mir-3187	-2.80084	1.51503e-82
ENSG00000105426	PTPRS	protein tyrosine phosphatase, receptor type, S	-1.16736	3.89781e-235
ENSG00000161544	CYGB	cytoglobin	-4.2521	0
ENSG00000108733	PEX12	peroxisomal biogenesis factor 12	-1.78845	2.88969e-58
ENSG00000250039	RP11-17E2.2		-2.6171	8.68385e-85
ENSG00000198597	ZNF536	zinc finger protein 536	-1.71234	2.79294e-61
ENSG00000141448	GATA6	GATA binding protein 6	-1.13277	3.72987e-28
ENSG00000039319	ZFYVE16	zinc finger, FYVE domain containing 16	-3.37402	0
ENSG00000162736	NCSTN	nicastrin	-1.00578	3.90761e-169
ENSG00000131732	ZCCHC9	zinc finger, CCHC domain containing 9	-1.27651	7.71607e-106
ENSG00000093010	COMT	catechol-O-methyltransferase	-1.09972	5.91252e-78
ENSG00000170881	RNF139	ring finger protein 139	-1.54627	1.16376e-277
ENSG00000165868	HSPA12A	heat shock 70kDa protein 12A	-2.01571	1.17154e-153
ENSG00000196358	NTNG2	netrin G2	-1.34058	4.3378e-07
ENSG00000133872	TMEM66	transmembrane protein 66	-1.26708	0
ENSG00000198873	GRK5	G protein-coupled receptor kinase 5	-1.4126	2.1509e-67
ENSG00000148450	MSRB2	methionine sulfoxide reductase B2	-2.4384	0
ENSG00000198901	PRC1	protein regulator of cytokinesis 1	-1.82645	0
ENSG00000172456	FGGY	FGGY carbohydrate kinase domain containing	-1.07797	4.65489e-17
ENSG00000188157	AGRN	agrin	-1.79275	6.84447e-214
ENSG00000254995	STX16-NPEPL1	STX16-NPEPL1 readthrough (non-protein coding)	-3.10391	1.15246e-155
ENSG00000122068	FYTTD1	forty-two-three domain containing 1	-1.97921	0
ENSG00000137807	KIF23	kinesin family member 23	-1.06258	6.84775e-76
ENSG00000168724	DNAJC21	DnaJ (Hsp40) homolog, subfamily C, member 21	-1.05674	8.44681e-103
ENSG00000197694	SPTAN1	spectrin, alpha, non-erythrocytic 1	-1.25113	2.04396e-249
ENSG00000168952	STXBP6	syntaxin binding protein 6 (amisyn)	-1.0095	1.00557e-11
ENSG00000151117	TMEM86A	transmembrane protein 86A	-2.02572	8.87554e-150
ENSG00000198089	SFI1	Sfi1 homolog, spindle assembly associated (yeast)	-1.21329	1.43416e-80
ENSG00000035687	ADSS	adenylosuccinate synthase	-2.18521	3.7357e-185
ENSG00000124019	FAM124B	family with sequence similarity 124B	-1.24167	3.28974e-31
ENSG00000246430	RP11-16M8.2		-1.45181	0.00296033
ENSG00000075785	RAB7A	RAB7A, member RAS oncogene family	-1.26781	5.88023e-263
ENSG00000165424	ZCCHC24	zinc finger, CCHC domain containing 24	-1.90364	1.34376e-128
ENSG00000197380	DACT3	dapper, antagonist of beta-catenin, homolog 3 (Xenopus laevis)	-1.86826	1.78205e-65
ENSG00000010295	IFFO1	intermediate filament family orphan 1	-1.42535	1.62182e-83
ENSG00000181577	C6orf223	chromosome 6 open reading frame 223	-5.91357	2.99508e-131
ENSG00000176715	ACSF3	acyl-CoA synthetase family member 3	-1.63126	5.22087e-111
ENSG00000118596	SLC16A7	solute carrier family 16, member 7 (monocarboxylic acid transporter 2)	-1.36633	1.13052e-12
ENSG00000177414	UBE2U	ubiquitin-conjugating enzyme E2U (putative)	-2.88238	2.12342e-188
ENSG00000179241	LDLRAD3	low density lipoprotein receptor class A domain containing 3	-1.84766	1.19791e-176
ENSG00000259845	HERC2P10	hect domain and RLD 2 pseudogene 10	-1.35215	1.33438e-25
ENSG00000185986	SDHAP3	succinate dehydrogenase complex, subunit A, flavoprotein pseudogene 3	-1.16581	2.87304e-32
ENSG00000156103	MMP16	matrix metallopeptidase 16 (membrane-inserted)	-1.00082	8.58432e-20
ENSG00000163009	C2orf48	chromosome 2 open reading frame 48	-1.58436	4.62746e-29
ENSG00000159214	CCDC24	coiled-coil domain containing 24	-2.47116	9.52464e-93
ENSG00000057252	SOAT1	sterol O-acyltransferase 1	-1.35224	5.42368e-124
ENSG00000206341	HLA-H	major histocompatibility complex, class I, H (pseudogene)	-1.74856	2.1294e-50
ENSG00000180776	ZDHHC20	zinc finger, DHHC-type containing 20	-1.01622	6.86746e-11
ENSG00000173706	HEG1	HEG homolog 1 (zebrafish)	-1.72364	1.39423e-153
ENSG00000104450	SPAG1	sperm associated antigen 1	-1.33733	1.95081e-40
ENSG00000159164	SV2A	synaptic vesicle glycoprotein 2A	-3.73824	0
ENSG00000114054	PCCB	propionyl CoA carboxylase, beta polypeptide	-1.18665	1.43751e-53
ENSG00000072310	SREBF1	sterol regulatory element binding transcription factor 1	-1.91882	0
ENSG00000064393	HIPK2	homeodomain interacting protein kinase 2	-2.12859	5.35849e-72
ENSG00000163945	UVSSA	UV-stimulated scaffold protein A	-1.00556	1.47796e-103
ENSG00000173531	MST1	macrophage stimulating 1 (hepatocyte growth factor-like)	-2.6647	1.58746e-269
ENSG00000138336	TET1	tet methylcytosine dioxygenase 1	-1.83987	4.5874e-114
ENSG00000159674	SPON2	spondin 2, extracellular matrix protein	-2.28419	8.61338e-43
ENSG00000136231	IGF2BP3	insulin-like growth factor 2 mRNA binding protein 3	-1.60344	1.59776e-149
ENSG00000157483	MYO1E	myosin IE	-1.01087	5.10162e-92
ENSG00000135929	CYP27A1	cytochrome P450, family 27, subfamily A, polypeptide 1	-1.57376	9.98755e-164
ENSG00000182379	NXPH4	neurexophilin 4	-1.77821	5.02911e-37
ENSG00000160055	TMEM234	transmembrane protein 234	-1.74515	5.89277e-245
ENSG00000197594	ENPP1	ectonucleotide pyrophosphatase/phosphodiesterase 1	-2.51208	1.02845e-258
ENSG00000139613	SMARCC2	SWI/SNF related, matrix associated, actin dependent regulator of chromatin, subfamily c, member 2	-1.1996	2.83632e-128
ENSG00000071054	MAP4K4	mitogen-activated protein kinase kinase kinase kinase 4	-1.7303	0
ENSG00000168243	GNG4	guanine nucleotide binding protein (G protein), gamma 4	-1.46485	9.46101e-20
ENSG00000087510	TFAP2C	transcription factor AP-2 gamma (activating enhancer binding protein 2 gamma)	-1.28627	1.80608e-25
ENSG00000129538	RNASE1	ribonuclease, RNase A family, 1 (pancreatic)	-6.50167	1.0326e-99
ENSG00000171467	ZNF318	zinc finger protein 318	-1.66487	0
ENSG00000174945	AMZ1	archaelysin family metallopeptidase 1	-1.65024	4.4082e-44
ENSG00000112699	GMDS	GDP-mannose 4,6-dehydratase	-1.19021	6.20399e-57
ENSG00000161653	NAGS	N-acetylglutamate synthase	-3.59483	1.89887e-145
ENSG00000151176	PLBD2	phospholipase B domain containing 2	-2.3071	1.60507e-192
ENSG00000167202	TBC1D2B	TBC1 domain family, member 2B	-1.78447	3.89192e-233
ENSG00000074317	SNCB	synuclein, beta	-2.77753	4.08639e-87
ENSG00000067057	PFKP	phosphofructokinase, platelet	-3.31815	0
ENSG00000175567	UCP2	uncoupling protein 2 (mitochondrial, proton carrier)	-2.53216	2.83547e-81
ENSG00000067842	ATP2B3	ATPase, Ca++ transporting, plasma membrane 3	-4.44467	3.93883e-153
ENSG00000108960	MMD	monocyte to macrophage differentiation-associated	-1.94116	1.3636e-251
ENSG00000172292	CERS6	ceramide synthase 6	-1.51302	7.54325e-64
ENSG00000177508	IRX3	iroquois homeobox 3	-1.33103	1.86922e-69
ENSG00000198054	DSCR8	Down syndrome critical region gene 8	-1.09404	1.98723e-74
ENSG00000225106	RP11-429E11.2		-1.59556	2.07816e-76
ENSG00000160298	C21orf58	chromosome 21 open reading frame 58	-1.10362	1.1171e-30
ENSG00000120008	WDR11	WD repeat domain 11	-1.07845	6.83223e-104
ENSG00000174348	PODN	podocan	-3.60201	2.36613e-75
ENSG00000123124	WWP1	WW domain containing E3 ubiquitin protein ligase 1	-1.69061	5.53563e-278
ENSG00000123384	LRP1	low density lipoprotein receptor-related protein 1	-3.28089	0
ENSG00000160307	S100B	S100 calcium binding protein B	-2.3268	6.62088e-125
ENSG00000112679	DUSP22	dual specificity phosphatase 22	-1.32917	1.08143e-117
ENSG00000159958	TNFRSF13C	tumor necrosis factor receptor superfamily, member 13C	-2.42332	1.54918e-43
ENSG00000206560	ANKRD28	ankyrin repeat domain 28	-1.68706	0
ENSG00000144455	SUMF1	sulfatase modifying factor 1	-1.95202	3.08723e-172
ENSG00000104979	C19orf53	chromosome 19 open reading frame 53	-1.11531	2.78883e-76
ENSG00000095713	CRTAC1	cartilage acidic protein 1	-1.88708	3.31423e-40
ENSG00000145555	MYO10	myosin X	-1.14901	4.83817e-73
ENSG00000114127	XRN1	5'-3' exoribonuclease 1	-1.10139	1.68173e-105
ENSG00000163689	C3orf67	chromosome 3 open reading frame 67	-1.12912	3.70669e-44
ENSG00000123374	CDK2	cyclin-dependent kinase 2	-2.86716	0
ENSG00000089820	ARHGAP4	Rho GTPase activating protein 4	-2.05374	4.5622e-75
ENSG00000152223	EPG5	ectopic P-granules autophagy protein 5 homolog (C. elegans)	-1.12302	7.33787e-86
ENSG00000144681	STAC	SH3 and cysteine rich domain	-1.44756	0.00016181
ENSG00000198056	PRIM1	primase, DNA, polypeptide 1 (49kDa)	-1.90467	3.14526e-107
ENSG00000223414	LINC00473	long intergenic non-protein coding RNA 473	-2.66568	4.46523e-300
ENSG00000066739	ATG2B	autophagy related 2B	-1.50779	8.9475e-188
ENSG00000100302	RASD2	RASD family, member 2	-1.44595	1.76995e-80
ENSG00000149474	CSRP2BP	CSRP2 binding protein	-1.08891	3.69099e-51
ENSG00000232411	AC009495.3		-1.51933	1.51933e-09
ENSG00000178038	ALS2CL	ALS2 C-terminal like	-1.08048	2.73534e-14
ENSG00000135519	KCNH3	potassium voltage-gated channel, subfamily H (eag-related), member 3	-1.7394	5.88654e-34
ENSG00000073969	NSF	N-ethylmaleimide-sensitive factor	-1.78919	5.36325e-291
ENSG00000244476	ERVFRD-1	endogenous retrovirus group FRD, member 1	-2.45	3.16184e-70
ENSG00000184445	KNTC1	kinetochore associated 1	-1.28948	1.08563e-60
ENSG00000005471	ABCB4	ATP-binding cassette, sub-family B (MDR/TAP), member 4	-1.56099	4.40772e-23
ENSG00000149485	FADS1	fatty acid desaturase 1	-2.06934	2.24781e-230
ENSG00000171241	SHCBP1	SHC SH2-domain binding protein 1	-1.55312	9.83678e-276
ENSG00000164985	PSIP1	PC4 and SFRS1 interacting protein 1	-1.33816	4.79012e-112
ENSG00000135919	SERPINE2	serpin peptidase inhibitor, clade E (nexin, plasminogen activator inhibitor type 1), member 2	-1.28598	1.15596e-138
ENSG00000136379	FAM108C1	family with sequence similarity 108, member C1	-1.0675	2.18116e-23
ENSG00000088340	FER1L4	fer-1-like 4 (C. elegans) pseudogene	-2.62221	1.87109e-34
ENSG00000157470	FAM81A	family with sequence similarity 81, member A	-1.29843	3.7754e-32
ENSG00000239474	KBTBD10	kelch repeat and BTB (POZ) domain containing 10	-1.08047	6.79211e-09
ENSG00000104388	RAB2A	RAB2A, member RAS oncogene family	-1.0735	5.07116e-118
ENSG00000136237	RAPGEF5	Rap guanine nucleotide exchange factor (GEF) 5	-1.63917	4.88077e-26
ENSG00000105255	FSD1	fibronectin type III and SPRY domain containing 1	-1.94559	7.25177e-113
ENSG00000167550	RHEBL1	Ras homolog enriched in brain like 1	-1.26583	2.03292e-35
ENSG00000197768	C9orf173	chromosome 9 open reading frame 173	-2.30978	1.08959e-53
ENSG00000184384	MAML2	mastermind-like 2 (Drosophila)	-1.4412	7.64239e-78
ENSG00000048707	VPS13D	vacuolar protein sorting 13 homolog D (S. cerevisiae)	-1.44293	8.41912e-70
ENSG00000170915	PAQR8	progestin and adipoQ receptor family member VIII	-2.87922	0
ENSG00000135047	CTSL1	cathepsin L1	-2.81318	0
ENSG00000105290	APLP1	amyloid beta (A4) precursor-like protein 1	-1.38373	3.59283e-16
ENSG00000134376	CRB1	crumbs homolog 1 (Drosophila)	-4.06361	1.8942e-127
ENSG00000130158	DOCK6	dedicator of cytokinesis 6	-1.06616	3.2103e-82
ENSG00000127663	KDM4B	lysine (K)-specific demethylase 4B	-1.55881	1.04673e-268
ENSG00000170153	RNF150	ring finger protein 150	-1.5511	4.59e-20
ENSG00000175471	MCTP1	multiple C2 domains, transmembrane 1	-1.45877	8.4095e-104
ENSG00000049323	LTBP1	latent transforming growth factor beta binding protein 1	-1.16554	5.77661e-53
ENSG00000078900	TP73	tumor protein p73	-1.65502	1.32921e-21
ENSG00000091640	SPAG7	sperm associated antigen 7	-1.83751	6.1796e-216
ENSG00000187650	VMAC	vimentin-type intermediate filament associated coiled-coil protein	-1.03158	2.10121e-29
ENSG00000115841	FAM82A1	family with sequence similarity 82, member A1	-1.67552	8.95717e-144
ENSG00000118777	ABCG2	ATP-binding cassette, sub-family G (WHITE), member 2	-2.35863	4.60038e-05
ENSG00000119684	MLH3	mutL homolog 3 (E. coli)	-2.23327	8.20166e-83
ENSG00000122507	BBS9	Bardet-Biedl syndrome 9	-2.45562	3.15908e-159
ENSG00000160766	GBAP1	glucosidase, beta, acid pseudogene 1	-2.05075	7.00926e-268
ENSG00000107789	MINPP1	multiple inositol-polyphosphate phosphatase 1	-1.78327	0
ENSG00000115041	KCNIP3	Kv channel interacting protein 3, calsenilin	-1.72894	2.78272e-64
ENSG00000154310	TNIK	TRAF2 and NCK interacting kinase	-2.11116	2.95177e-179
ENSG00000010017	RANBP9	RAN binding protein 9	-1.46732	6.49351e-119
ENSG00000112039	FANCE	Fanconi anemia, complementation group E	-1.13225	8.76312e-66
ENSG00000151116	UEVLD	UEV and lactate/malate dehyrogenase domains	-1.01971	8.20714e-38
ENSG00000020181	GPR124	G protein-coupled receptor 124	-1.54051	1.73269e-175
ENSG00000142494	SLC47A1	solute carrier family 47, member 1	-1.75324	1.93659e-54
ENSG00000112367	FIG4	FIG4 homolog, SAC1 lipid phosphatase domain containing (S. cerevisiae)	-1.24988	2.06558e-80
ENSG00000236017	ASMTL-AS1	ASMTL antisense RNA 1	-2.17828	2.56972e-132
ENSG00000124126	PREX1	phosphatidylinositol-3,4,5-trisphosphate-dependent Rac exchange factor 1	-1.20476	4.41968e-27
ENSG00000172733	PURG	purine-rich element binding protein G	-2.38741	1.02724e-43
ENSG00000145214	DGKQ	diacylglycerol kinase, theta 110kDa	-1.13716	1.37844e-64
ENSG00000251396	RP11-163N6.2		-1.1288	3.02044e-14
ENSG00000182957	SPATA13	spermatogenesis associated 13	-1.30385	1.31564e-76
ENSG00000124299	PEPD	peptidase D	-1.21562	2.74069e-67
ENSG00000234409	AC006547.14	uncharacterized protein LOC388849	-1.93279	1.26758e-33
ENSG00000167315	ACAA2	acetyl-CoA acyltransferase 2	-1.81394	3.43482e-106
ENSG00000133619	KRBA1	KRAB-A domain containing 1	-1.11439	1.42572e-82
ENSG00000130962	PRRG1	proline rich Gla (G-carboxyglutamic acid) 1	-1.66112	3.3563e-119
ENSG00000237499	RP11-356I2.4		-1.26951	5.35854e-21
ENSG00000125820	NKX2-2	NK2 homeobox 2	-1.39599	0.00430934
ENSG00000081760	AACS	acetoacetyl-CoA synthetase	-2.37147	0
ENSG00000169302	STK32A	serine/threonine kinase 32A	-2.12401	5.33645e-84
ENSG00000198542	ITGBL1	integrin, beta-like 1 (with EGF-like repeat domains)	-1.4948	1.16216e-16
ENSG00000125775	SDCBP2	syndecan binding protein (syntenin) 2	-1.07881	6.00821e-15
ENSG00000186301	MST1P2	macrophage stimulating 1 (hepatocyte growth factor-like) pseudogene 2	-2.28652	1.04213e-86
ENSG00000169992	NLGN2	neuroligin 2	-3.14032	0
ENSG00000054654	SYNE2	spectrin repeat containing, nuclear envelope 2	-1.08778	3.05577e-36
ENSG00000204248	COL11A2	collagen, type XI, alpha 2	-1.1079	7.37473e-20
ENSG00000102265	TIMP1	TIMP metallopeptidase inhibitor 1	-2.52313	6.97102e-99
ENSG00000127415	IDUA	iduronidase, alpha-L-	-2.01338	3.14062e-73
ENSG00000185418	TARSL2	threonyl-tRNA synthetase-like 2	-1.60756	3.6859e-169
ENSG00000128973	CLN6	ceroid-lipofuscinosis, neuronal 6, late infantile, variant	-1.8119	3.68193e-117
ENSG00000047249	ATP6V1H	ATPase, H+ transporting, lysosomal 50/57kDa, V1 subunit H	-2.24981	0
ENSG00000118257	NRP2	neuropilin 2	-2.85899	0
ENSG00000148344	PTGES	prostaglandin E synthase	-1.3997	7.64049e-06
ENSG00000163412	EIF4E3	eukaryotic translation initiation factor 4E family member 3	-1.40861	1.80847e-11
ENSG00000214575	CPEB1	cytoplasmic polyadenylation element binding protein 1	-1.91482	4.44406e-158
ENSG00000260841	CTC-205M6.5		-1.44706	5.27639e-43
ENSG00000130821	SLC6A8	solute carrier family 6 (neurotransmitter transporter, creatine), member 8	-1.04027	8.78007e-157
ENSG00000169760	NLGN1	neuroligin 1	-2.69215	6.32212e-129
ENSG00000237339	RP11-98L5.2		-3.66461	1.28568e-77
ENSG00000138463	DIRC2	disrupted in renal carcinoma 2	-1.42222	6.09851e-241
ENSG00000044090	CUL7	cullin 7	-1.24651	1.35067e-187
ENSG00000125246	CLYBL	citrate lyase beta like	-1.66939	5.57362e-42
ENSG00000135298	BAI3	brain-specific angiogenesis inhibitor 3	-1.3681	1.849e-35
ENSG00000090060	PAPOLA	poly(A) polymerase alpha	-1.11916	4.46569e-136
ENSG00000131096	PYY	peptide YY	-3.48467	9.50638e-68
ENSG00000262319	CTC-457L16.2		-2.50374	3.46066e-49
ENSG00000128052	KDR	kinase insert domain receptor (a type III receptor tyrosine kinase)	-1.66519	1.75705e-08
ENSG00000116882	HAO2	hydroxyacid oxidase 2 (long chain)	-2.65479	4.87661e-119
ENSG00000117054	ACADM	acyl-CoA dehydrogenase, C-4 to C-12 straight chain	-1.4156	8.89223e-199
ENSG00000131100	ATP6V1E1	ATPase, H+ transporting, lysosomal 31kDa, V1 subunit E1	-1.21124	0
ENSG00000205309	NT5M	5',3'-nucleotidase, mitochondrial	-2.1703	5.1429e-70
ENSG00000186998	EMID1	EMI domain containing 1	-3.10146	1.02074e-57
ENSG00000159713	TPPP3	tubulin polymerization-promoting protein family member 3	-1.09327	4.35049e-24
ENSG00000170961	HAS2	hyaluronan synthase 2	-1.49724	3.24978e-32
ENSG00000071859	FAM50A	family with sequence similarity 50, member A	-1.10783	1.30204e-157
ENSG00000167617	CDC42EP5	CDC42 effector protein (Rho GTPase binding) 5	-3.43963	1.9051e-15
ENSG00000198400	NTRK1	neurotrophic tyrosine kinase, receptor, type 1	-3.31998	1.61827e-63
ENSG00000162607	USP1	ubiquitin specific peptidase 1	-1.77897	7.71852e-116
ENSG00000226091	RP11-90D4.2		-2.26569	3.114e-73
ENSG00000141577	AZI1	5-azacytidine induced 1	-1.48825	1.26218e-145
ENSG00000116754	SRSF11	serine/arginine-rich splicing factor 11	-1.14339	3.11616e-250
ENSG00000143578	CREB3L4	cAMP responsive element binding protein 3-like 4	-1.15483	9.42291e-82
ENSG00000110844	PRPF40B	PRP40 pre-mRNA processing factor 40 homolog B (S. cerevisiae)	-1.40479	7.18185e-89
ENSG00000119943	PYROXD2	pyridine nucleotide-disulphide oxidoreductase domain 2	-1.23582	5.99208e-90
ENSG00000244038	DDOST	dolichyl-diphosphooligosaccharide--protein glycosyltransferase	-1.37341	0
ENSG00000160191	PDE9A	phosphodiesterase 9A	-2.40314	1.02206e-100
ENSG00000012174	MBTPS2	membrane-bound transcription factor peptidase, site 2	-1.66694	2.03334e-104
ENSG00000172638	EFEMP2	EGF containing fibulin-like extracellular matrix protein 2	-3.23411	8.70757e-109
ENSG00000178752	FAM132B	family with sequence similarity 132, member B	-1.82314	9.89878e-27
ENSG00000185499	MUC1	mucin 1, cell surface associated	-1.34191	2.44036e-21
ENSG00000174628	IQCK	IQ motif containing K	-2.55911	5.49857e-205
ENSG00000151148	UBE3B	ubiquitin protein ligase E3B	-1.66559	2.45227e-188
ENSG00000163683	C4orf34	chromosome 4 open reading frame 34	-1.78655	1.63436e-147
ENSG00000260611	RP11-352B15.2		-2.32269	1.64037e-53
ENSG00000104205	SGK3	serum/glucocorticoid regulated kinase family, member 3	-2.32096	0
ENSG00000156966	B3GNT7	UDP-GlcNAc:betaGal beta-1,3-N-acetylglucosaminyltransferase 7	-1.14035	3.81928e-14
ENSG00000142197	DOPEY2	dopey family member 2	-1.1074	2.93513e-62
ENSG00000165795	NDRG2	NDRG family member 2	-1.947	1.36749e-246
ENSG00000135205	CCDC146	coiled-coil domain containing 146	-1.12077	9.53698e-52
ENSG00000180035	ZNF48	zinc finger protein 48	-1.70589	3.74145e-99
ENSG00000164398	ACSL6	acyl-CoA synthetase long-chain family member 6	-2.65872	1.23456e-51
ENSG00000067955	CBFB	core-binding factor, beta subunit	-1.46166	3.46702e-124
ENSG00000049769	PPP1R3F	protein phosphatase 1, regulatory subunit 3F	-1.98136	7.69407e-157
ENSG00000248445	CTB-118N6.3		-2.44664	7.39988e-34
ENSG00000100968	NFATC4	nuclear factor of activated T-cells, cytoplasmic, calcineurin-dependent 4	-1.07566	1.39497e-33
ENSG00000141002	TCF25	transcription factor 25 (basic helix-loop-helix)	-1.18367	3.58624e-206
ENSG00000135905	DOCK10	dedicator of cytokinesis 10	-1.93316	9.06523e-72
ENSG00000110628	SLC22A18	solute carrier family 22, member 18	-3.30377	0
ENSG00000173757	STAT5B	signal transducer and activator of transcription 5B	-1.16028	9.75869e-69
ENSG00000133026	MYH10	myosin, heavy chain 10, non-muscle	-1.93299	2.21931e-201
ENSG00000143466	IKBKE	inhibitor of kappa light polypeptide gene enhancer in B-cells, kinase epsilon	-2.1468	1.33681e-130
ENSG00000164961	KIAA0196	KIAA0196	-1.46934	4.77087e-204
ENSG00000151491	EPS8	epidermal growth factor receptor pathway substrate 8	-1.92615	0
ENSG00000170369	CST2	cystatin SA	-3.571	1.78823e-58
ENSG00000128710	HOXD10	homeobox D10	-1.64517	0.0329316
ENSG00000107263	RAPGEF1	Rap guanine nucleotide exchange factor (GEF) 1	-1.09048	1.71837e-53
ENSG00000007264	MATK	megakaryocyte-associated tyrosine kinase	-1.22555	0.000963701
ENSG00000231389	HLA-DPA1	major histocompatibility complex, class II, DP alpha 1	-4.01467	4.95739e-87
ENSG00000086717	PPEF1	protein phosphatase, EF-hand calcium binding domain 1	-1.63256	1.41761e-17
ENSG00000136573	BLK	B lymphoid tyrosine kinase	-1.26648	4.60632e-19
ENSG00000154114	TBCEL	tubulin folding cofactor E-like	-1.20254	4.43366e-93
ENSG00000212766	LINC00277	long intergenic non-protein coding RNA 277	-2.69352	1.11002e-60
ENSG00000072694	FCGR2B	Fc fragment of IgG, low affinity IIb, receptor (CD32)	-2.9738	1.24146e-73
ENSG00000165282	PIGO	phosphatidylinositol glycan anchor biosynthesis, class O	-1.24823	1.68009e-217
ENSG00000187017	ESPN	espin	-4.61281	2.11886e-48
ENSG00000138031	ADCY3	adenylate cyclase 3	-1.41763	1.27368e-180
ENSG00000145050	MANF	mesencephalic astrocyte-derived neurotrophic factor	-1.28311	4.31436e-111
ENSG00000075399	C16orf7	chromosome 16 open reading frame 7	-1.58863	7.21568e-69
ENSG00000103355	PRSS33	protease, serine, 33	-5.94014	6.65041e-74
ENSG00000171492	LRRC8D	leucine rich repeat containing 8 family, member D	-1.23002	4.09081e-57
ENSG00000205041	CTC-425O23.2		-1.86697	6.23002e-41
ENSG00000120318	ARAP3	ArfGAP with RhoGAP domain, ankyrin repeat and PH domain 3	-2.27114	1.1035e-07
ENSG00000215105	TTC3P1	tetratricopeptide repeat domain 3 pseudogene 1	-3.60379	3.17192e-80
ENSG00000085382	HACE1	HECT domain and ankyrin repeat containing E3 ubiquitin protein ligase 1	-1.34504	7.7967e-117
ENSG00000182685	C16orf79	chromosome 16 open reading frame 79	-1.07545	1.34005e-21
ENSG00000185650	ZFP36L1	zinc finger protein 36, C3H type-like 1	-1.16248	3.90993e-205
ENSG00000102445	KIAA0226L	KIAA0226-like	-1.77831	9.35054e-50
ENSG00000137486	ARRB1	arrestin, beta 1	-2.03588	2.36762e-197
ENSG00000214826	DDX12P	DEAD/H (Asp-Glu-Ala-Asp/His) box polypeptide 12, pseudogene	-1.04052	1.87488e-55
ENSG00000112394	SLC16A10	solute carrier family 16, member 10 (aromatic amino acid transporter)	-2.50737	1.52432e-133
ENSG00000260822	GS1-358P8.4		-1.81086	4.31793e-92
ENSG00000116984	MTR	5-methyltetrahydrofolate-homocysteine methyltransferase	-1.59389	2.54052e-122
ENSG00000135409	AMHR2	anti-Mullerian hormone receptor, type II	-5.30502	1.21669e-64
ENSG00000250510	GPR162	G protein-coupled receptor 162	-2.89019	1.81165e-45
ENSG00000236013	RP3-332B22.1		-1.22069	5.24847e-15
ENSG00000227766	HCG4P5	HLA complex group 4 pseudogene 5	-1.84532	5.2774e-34
ENSG00000164877	MICALL2	MICAL-like 2	-1.14557	4.92776e-22
ENSG00000090520	DNAJB11	DnaJ (Hsp40) homolog, subfamily B, member 11	-1.4698	4.06915e-283
ENSG00000205777	GAGE1	G antigen 1	-1.63258	4.14245e-48
ENSG00000077092	RARB	retinoic acid receptor, beta	-2.92307	4.4659e-62
ENSG00000188269	OR7A5	olfactory receptor, family 7, subfamily A, member 5	-1.89041	3.01406e-24
ENSG00000198467	TPM2	tropomyosin 2 (beta)	-1.1338	2.04512e-22
ENSG00000064042	LIMCH1	LIM and calponin homology domains 1	-2.6723	1.12839e-202
ENSG00000167971	CASKIN1	CASK interacting protein 1	-3.49455	3.00277e-108
ENSG00000137815	RTF1	Rtf1, Paf1/RNA polymerase II complex component, homolog (S. cerevisiae)	-2.05676	0
ENSG00000071553	ATP6AP1	ATPase, H+ transporting, lysosomal accessory protein 1	-2.75595	0
ENSG00000069020	MAST4	microtubule associated serine/threonine kinase family member 4	-1.55152	7.32922e-60
ENSG00000018408	WWTR1	WW domain containing transcription regulator 1	-1.41164	2.97852e-206
ENSG00000236609	ZNF853	zinc finger protein 853	-1.35282	8.64902e-06
ENSG00000257923	CUX1	cut-like homeobox 1	-1.07654	5.85296e-101
ENSG00000140479	PCSK6	proprotein convertase subtilisin/kexin type 6	-1.12937	1.82055e-43
ENSG00000172889	EGFL7	EGF-like-domain, multiple 7	-2.42061	1.26548e-123
ENSG00000162148	PPP1R32	protein phosphatase 1, regulatory subunit 32	-1.14258	9.95127e-13
ENSG00000164611	PTTG1	pituitary tumor-transforming 1	-1.5082	0
ENSG00000004766	CCDC132	coiled-coil domain containing 132	-1.71991	4.84026e-155
ENSG00000169499	PLEKHA2	pleckstrin homology domain containing, family A (phosphoinositide binding specific) member 2	-1.46828	1.35734e-51
ENSG00000103249	CLCN7	chloride channel, voltage-sensitive 7	-1.03111	5.74092e-96
ENSG00000112992	NNT	nicotinamide nucleotide transhydrogenase	-1.96732	3.65901e-125
ENSG00000099330	OCEL1	occludin/ELL domain containing 1	-1.48461	2.04811e-112
ENSG00000253414	RP11-150O12.6		-2.50687	2.05042e-73
ENSG00000151693	ASAP2	ArfGAP with SH3 domain, ankyrin repeat and PH domain 2	-1.96725	1.38017e-183
ENSG00000023171	GRAMD1B	GRAM domain containing 1B	-1.82214	0.00326533
ENSG00000167363	FN3K	fructosamine 3 kinase	-2.71586	3.26437e-288
ENSG00000196911	KPNA5	karyopherin alpha 5 (importin alpha 6)	-1.09963	6.75495e-73
ENSG00000152128	TMEM163	transmembrane protein 163	-1.84874	1.24804e-45
ENSG00000228109	MFI2-AS1	MFI2 antisense RNA 1	-1.04324	1.14008e-27
ENSG00000152127	MGAT5	mannosyl (alpha-1,6-)-glycoprotein beta-1,6-N-acetyl-glucosaminyltransferase	-1.74231	2.00468e-153
ENSG00000145979	TBC1D7	TBC1 domain family, member 7	-2.33268	0
ENSG00000169756	LIMS1	LIM and senescent cell antigen-like domains 1	-1.60852	1.03029e-135
ENSG00000247011	RP11-700H6.1		-4.30892	3.7046e-54
ENSG00000176244	ACBD7	acyl-CoA binding domain containing 7	-1.06386	6.34389e-14
ENSG00000058056	USP13	ubiquitin specific peptidase 13 (isopeptidase T-3)	-1.52775	5.21803e-110
ENSG00000173068	BNC2	basonuclin 2	-2.00654	1.22832e-117
ENSG00000141510	TP53	tumor protein p53	-1.21879	1.34013e-78
ENSG00000183762	KREMEN1	kringle containing transmembrane protein 1	-1.62945	1.49434e-65
ENSG00000159459	UBR1	ubiquitin protein ligase E3 component n-recognin 1	-1.22834	2.31221e-48
ENSG00000000003	TSPAN6	tetraspanin 6	-2.65968	0
ENSG00000258839	MC1R	melanocortin 1 receptor (alpha melanocyte stimulating hormone receptor)	-1.33442	1.73089e-108
ENSG00000141349	G6PC3	glucose 6 phosphatase, catalytic, 3	-1.59014	0
ENSG00000115461	IGFBP5	insulin-like growth factor binding protein 5	-2.61112	1.93715e-66
ENSG00000135124	P2RX4	purinergic receptor P2X, ligand-gated ion channel, 4	-1.27298	3.68889e-150
ENSG00000105976	MET	met proto-oncogene (hepatocyte growth factor receptor)	-1.88549	1.66669e-77
ENSG00000158402	CDC25C	cell division cycle 25 homolog C (S. pombe)	-1.41697	3.26817e-85
ENSG00000182473	EXOC7	exocyst complex component 7	-1.01702	1.80701e-93
ENSG00000169371	SNUPN	snurportin 1	-1.14391	1.47152e-19
ENSG00000139168	ZCRB1	zinc finger CCHC-type and RNA binding motif 1	-1.68279	1.05315e-173
ENSG00000132613	MTSS1L	metastasis suppressor 1-like	-1.41658	2.89514e-223
ENSG00000159228	CBR1	carbonyl reductase 1	-1.31006	3.40601e-191
ENSG00000119915	ELOVL3	ELOVL fatty acid elongase 3	-1.01688	1.78381e-13
ENSG00000129038	LOXL1	lysyl oxidase-like 1	-3.68318	3.25727e-14
ENSG00000176834	VSIG10	V-set and immunoglobulin domain containing 10	-1.24222	1.52829e-54
ENSG00000163840	DTX3L	deltex 3-like (Drosophila)	-1.1115	4.81417e-165
ENSG00000127561	SYNGR3	synaptogyrin 3	-2.27343	6.72416e-87
ENSG00000069493	CLEC2D	C-type lectin domain family 2, member D	-1.98345	1.83136e-57
ENSG00000175087	PDIK1L	PDLIM1 interacting kinase 1 like	-1.14918	4.58584e-98
ENSG00000124831	LRRFIP1	leucine rich repeat (in FLII) interacting protein 1	-1.13278	2.8423e-81
ENSG00000091157	WDR7	WD repeat domain 7	-1.17334	2.54368e-83
ENSG00000181045	SLC26A11	solute carrier family 26, member 11	-1.41724	1.32013e-152
ENSG00000102575	ACP5	acid phosphatase 5, tartrate resistant	-2.82372	0
ENSG00000115652	UXS1	UDP-glucuronate decarboxylase 1	-1.56567	1.35565e-215
ENSG00000260834	RP11-256I9.2		-1.64573	8.15719e-27
ENSG00000122483	CCDC18	coiled-coil domain containing 18	-1.07525	1.04528e-53
ENSG00000144035	NAT8	N-acetyltransferase 8 (GCN5-related, putative)	-2.94813	1.87092e-45
ENSG00000267339	CTD-2081K17.1		-2.15576	0.00503789
ENSG00000254815	RP11-496I9.1		-1.45118	1.32804e-15
ENSG00000127527	EPS15L1	epidermal growth factor receptor pathway substrate 15-like 1	-1.16571	1.91326e-92
ENSG00000141933	TPGS1	tubulin polyglutamylase complex subunit 1	-1.32529	1.44525e-32
ENSG00000111145	ELK3	ELK3, ETS-domain protein (SRF accessory protein 2)	-1.15805	4.7076e-114
ENSG00000168056	LTBP3	latent transforming growth factor beta binding protein 3	-1.90418	2.17491e-290
ENSG00000136156	ITM2B	integral membrane protein 2B	-2.18019	0
ENSG00000091844	RGS17	regulator of G-protein signaling 17	-1.25363	4.77974e-29
ENSG00000169679	BUB1	budding uninhibited by benzimidazoles 1 homolog (yeast)	-1.85602	0
ENSG00000155754	ALS2CR11	amyotrophic lateral sclerosis 2 (juvenile) chromosome region, candidate 11	-1.04999	0.00812576
ENSG00000010671	BTK	Bruton agammaglobulinemia tyrosine kinase	-4.12956	5.19284e-144
ENSG00000147576	ADHFE1	alcohol dehydrogenase, iron containing, 1	-1.91813	3.42699e-114
ENSG00000182218	HHIPL1	HHIP-like 1	-1.68275	4.68742e-09
ENSG00000185924	RTN4RL1	reticulon 4 receptor-like 1	-1.82776	2.05846e-69
ENSG00000104635	SLC39A14	solute carrier family 39 (zinc transporter), member 14	-1.05511	1.0847e-36
ENSG00000171791	BCL2	B-cell CLL/lymphoma 2	-1.92608	0
ENSG00000155749	ALS2CR12	amyotrophic lateral sclerosis 2 (juvenile) chromosome region, candidate 12	-1.74804	3.04812e-54
ENSG00000014824	SLC30A9	solute carrier family 30 (zinc transporter), member 9	-2.10552	0
ENSG00000206077	ZDHHC11B	zinc finger, DHHC-type containing 11B	-1.93722	0
ENSG00000153956	CACNA2D1	calcium channel, voltage-dependent, alpha 2/delta subunit 1	-1.04482	3.67127e-28
ENSG00000104953	TLE6	transducin-like enhancer of split 6 (E(sp1) homolog, Drosophila)	-1.16662	2.74156e-46
ENSG00000166575	TMEM135	transmembrane protein 135	-1.77938	2.31055e-125
ENSG00000140522	RLBP1	retinaldehyde binding protein 1	-1.03866	5.1767e-10
ENSG00000164506	STXBP5	syntaxin binding protein 5 (tomosyn)	-1.76519	1.34879e-105
ENSG00000226574	SPANXA2-OT1	SPANXA2 overlapping transcript 1 (non-protein coding)	-1.75361	8.12279e-17
ENSG00000041515	MYO16	myosin XVI	-2.29828	1.37239e-144
ENSG00000140400	MAN2C1	mannosidase, alpha, class 2C, member 1	-1.26117	0
ENSG00000103479	RBL2	retinoblastoma-like 2 (p130)	-1.02639	2.31783e-30
ENSG00000001630	CYP51A1	cytochrome P450, family 51, subfamily A, polypeptide 1	-1.40922	6.22716e-34
ENSG00000172500	FIBP	fibroblast growth factor (acidic) intracellular binding protein	-1.19433	2.6426e-33
ENSG00000129103	SUMF2	sulfatase modifying factor 2	-1.02044	6.49586e-146
ENSG00000254122	PCDHGB7	protocadherin gamma subfamily B, 7	-1.82208	2.77766e-19
ENSG00000106333	PCOLCE	procollagen C-endopeptidase enhancer	-2.07997	1.2098e-75
ENSG00000179091	CYC1	cytochrome c-1	-1.10442	4.59879e-107
ENSG00000186522	SEPT10	septin 10	-1.72934	5.66394e-225
ENSG00000235192	AC009495.2		-2.06399	3.33151e-06
ENSG00000135439	AGAP2	ArfGAP with GTPase domain, ankyrin repeat and PH domain 2	-3.32106	7.55035e-40
ENSG00000129534	MIS18BP1	MIS18 binding protein 1	-1.32301	1.97109e-132
ENSG00000164434	FABP7	fatty acid binding protein 7, brain	-1.21345	2.43629e-11
ENSG00000119630	PGF	placental growth factor	-3.13983	9.80868e-109
ENSG00000134215	VAV3	vav 3 guanine nucleotide exchange factor	-1.2449	9.39249e-07
ENSG00000145335	SNCA	synuclein, alpha (non A4 component of amyloid precursor)	-1.60729	0
ENSG00000130150	MOSPD2	motile sperm domain containing 2	-1.10358	1.67782e-103
ENSG00000160469	BRSK1	BR serine/threonine kinase 1	-3.25038	1.70949e-208
ENSG00000215817	ZC3H11B	zinc finger CCCH-type containing 11B pseudogene	-1.52724	2.36129e-05
ENSG00000175029	CTBP2	C-terminal binding protein 2	-1.55408	2.62704e-292
ENSG00000116991	SIPA1L2	signal-induced proliferation-associated 1 like 2	-1.16853	5.13026e-73
ENSG00000168077	SCARA3	scavenger receptor class A, member 3	-1.58356	0.000544402
ENSG00000185019	UBOX5	U-box domain containing 5	-1.03135	3.96424e-30
ENSG00000019485	PRDM11	PR domain containing 11	-1.62061	0.000598377
ENSG00000109339	MAPK10	mitogen-activated protein kinase 10	-3.90893	6.88185e-48
ENSG00000185278	ZBTB37	zinc finger and BTB domain containing 37	-1.6787	1.60608e-19
ENSG00000115993	TRAK2	trafficking protein, kinesin binding 2	-2.43528	3.69175e-250
ENSG00000170819	BFSP2	beaded filament structural protein 2, phakinin	-1.15663	1.53338e-17
ENSG00000010318	PHF7	PHD finger protein 7	-1.50728	2.88679e-86
ENSG00000254389	RHPN1-AS1	RHPN1 antisense RNA 1	-1.22517	1.73201e-20
ENSG00000213585	VDAC1	voltage-dependent anion channel 1	-1.32189	2.59931e-205
ENSG00000178175	ZNF366	zinc finger protein 366	-1.67128	2.51426e-17
ENSG00000177595	PIDD	p53-induced death domain protein	-1.03338	7.05159e-22
ENSG00000173821	RNF213	ring finger protein 213	-1.44521	1.10224e-79
ENSG00000198870	C9orf96	chromosome 9 open reading frame 96	-1.24749	3.3409e-51
ENSG00000121753	BAI2	brain-specific angiogenesis inhibitor 2	-3.41745	0
ENSG00000163354	DCST2	DC-STAMP domain containing 2	-2.07772	1.53235e-27
ENSG00000187091	PLCD1	phospholipase C, delta 1	-1.27401	4.26131e-39
ENSG00000167220	HDHD2	haloacid dehalogenase-like hydrolase domain containing 2	-1.12651	2.20894e-106
ENSG00000017373	SRCIN1	SRC kinase signaling inhibitor 1	-2.0074	1.12288e-55
ENSG00000166839	ANKDD1A	ankyrin repeat and death domain containing 1A	-1.27053	1.28831e-38
ENSG00000231758	AC092652.1		-5.23675	6.27816e-52
ENSG00000198363	ASPH	aspartate beta-hydroxylase	-1.15468	3.41579e-133
ENSG00000138400	MDH1B	malate dehydrogenase 1B, NAD (soluble)	-2.3685	3.04843e-85
ENSG00000186871	ERCC6L	excision repair cross-complementing rodent repair deficiency, complementation group 6-like	-1.18494	4.86475e-42
ENSG00000099864	PALM	paralemmin	-1.1179	8.82164e-35
ENSG00000122694	GLIPR2	GLI pathogenesis-related 2	-1.45488	1.00084e-31
ENSG00000162545	CAMK2N1	calcium/calmodulin-dependent protein kinase II inhibitor 1	-1.60916	4.88623e-72
ENSG00000152380	FAM151B	family with sequence similarity 151, member B	-3.5972	2.86899e-66
ENSG00000167580	AQP2	aquaporin 2 (collecting duct)	-3.74262	6.7976e-56
ENSG00000140795	MYLK3	myosin light chain kinase 3	-2.71359	1.44099e-32
ENSG00000213626	LBH	limb bud and heart development homolog (mouse)	-1.53648	0.0142787
ENSG00000111911	HINT3	histidine triad nucleotide binding protein 3	-2.05829	9.52974e-94
ENSG00000112584	FAM120B	family with sequence similarity 120B	-1.24697	1.61896e-265
ENSG00000166451	CENPN	centromere protein N	-1.36005	1.12589e-172
ENSG00000128578	FAM40B	family with sequence similarity 40, member B	-1.11061	8.18937e-34
ENSG00000115282	TTC31	tetratricopeptide repeat domain 31	-1.20025	1.87107e-125
ENSG00000259803	RP11-46C24.8		-5.63635	7.90391e-47
ENSG00000117122	MFAP2	microfibrillar-associated protein 2	-2.33179	2.59567e-32
ENSG00000110436	SLC1A2	solute carrier family 1 (glial high affinity glutamate transporter), member 2	-1.96516	5.487e-38
ENSG00000179930	ZNF648	zinc finger protein 648	-1.22421	2.45965e-07
ENSG00000140015	KCNH5	potassium voltage-gated channel, subfamily H (eag-related), member 5	-2.55312	9.59852e-44
ENSG00000119698	PPP4R4	protein phosphatase 4, regulatory subunit 4	-1.6596	2.23002e-22
ENSG00000207985	MIR663A	microRNA 663a	-1.05318	6.26148e-07
ENSG00000130177	CDC16	cell division cycle 16 homolog (S. cerevisiae)	-1.24232	3.4403e-212
ENSG00000237989	AP001046.5		-1.36714	2.06977e-29
ENSG00000132313	MRPL35	mitochondrial ribosomal protein L35	-1.66755	4.77106e-165
ENSG00000220412	RP11-95M15.2		-1.13067	1.59199e-11
ENSG00000060656	PTPRU	protein tyrosine phosphatase, receptor type, U	-1.84202	2.80657e-88
ENSG00000141179	PCTP	phosphatidylcholine transfer protein	-1.86582	4.17087e-209
ENSG00000166794	PPIB	peptidylprolyl isomerase B (cyclophilin B)	-1.29375	9.03109e-152
ENSG00000203797	DDO	D-aspartate oxidase	-3.64323	1.22094e-40
ENSG00000163932	PRKCD	protein kinase C, delta	-1.15663	2.32319e-160
ENSG00000163527	STT3B	STT3, subunit of the oligosaccharyltransferase complex, homolog B (S. cerevisiae)	-1.48518	1.00827e-231
ENSG00000076382	SPAG5	sperm associated antigen 5	-1.199	1.73625e-159
ENSG00000010803	SCMH1	sex comb on midleg homolog 1 (Drosophila)	-1.66145	1.32174e-107
ENSG00000131747	TOP2A	topoisomerase (DNA) II alpha 170kDa	-1.7795	8.57985e-122
ENSG00000160323	ADAMTS13	ADAM metallopeptidase with thrombospondin type 1 motif, 13	-3.19636	8.6968e-277
ENSG00000092051	JPH4	junctophilin 4	-2.55384	2.95969e-52
ENSG00000127507	EMR2	egf-like module containing, mucin-like, hormone receptor-like 2	-1.57721	6.71607e-05
ENSG00000172828	CES3	carboxylesterase 3	-1.07688	2.14373e-12
ENSG00000146409	SLC18B1	solute carrier family 18, subfamily B, member 1	-1.15381	3.40169e-140
ENSG00000102924	CBLN1	cerebellin 1 precursor	-1.78709	2.4763e-20
ENSG00000131969	ABHD12B	abhydrolase domain containing 12B	-1.55307	3.63155e-19
ENSG00000170348	TMED10	transmembrane emp24-like trafficking protein 10 (yeast)	-2.1947	0
ENSG00000189001	SBSN	suprabasin	-3.0264	1.97908e-34
ENSG00000145832	SLC25A48	solute carrier family 25, member 48	-3.70519	5.07703e-46
ENSG00000188338	SLC38A3	solute carrier family 38, member 3	-4.29336	2.51309e-44
ENSG00000187642	C1orf170	chromosome 1 open reading frame 170	-2.98683	1.53097e-38
ENSG00000182890	GLUD2	glutamate dehydrogenase 2	-1.11626	1.57492e-10
ENSG00000113140	SPARC	secreted protein, acidic, cysteine-rich (osteonectin)	-1.37816	2.53243e-104
ENSG00000187240	DYNC2H1	dynein, cytoplasmic 2, heavy chain 1	-1.55372	1.28784e-124
ENSG00000134755	DSC2	desmocollin 2	-1.28991	1.54025e-28
ENSG00000248905	FMN1	formin 1	-2.08964	5.70723e-176
ENSG00000005022	SLC25A5	solute carrier family 25 (mitochondrial carrier; adenine nucleotide translocator), member 5	-1.17325	4.24638e-55
ENSG00000158887	MPZ	myelin protein zero	-1.65609	5.50088e-49
ENSG00000197102	DYNC1H1	dynein, cytoplasmic 1, heavy chain 1	-1.67228	1.13029e-141
ENSG00000198162	MAN1A2	mannosidase, alpha, class 1A, member 2	-2.27527	0
ENSG00000100605	ITPK1	inositol-tetrakisphosphate 1-kinase	-1.50115	4.34423e-130
ENSG00000111752	PHC1	polyhomeotic homolog 1 (Drosophila)	-1.2741	2.22767e-87
ENSG00000135424	ITGA7	integrin, alpha 7	-4.38768	0
ENSG00000103254	FAM173A	family with sequence similarity 173, member A	-1.03714	2.15691e-70
ENSG00000170606	HSPA4	heat shock 70kDa protein 4	-1.39213	0
ENSG00000173918	C1QTNF1	C1q and tumor necrosis factor related protein 1	-1.05216	9.92544e-09
ENSG00000126561	STAT5A	signal transducer and activator of transcription 5A	-1.22863	2.87065e-66
ENSG00000196118	C16orf93	chromosome 16 open reading frame 93	-1.42731	5.97473e-23
ENSG00000231007	CDC20P1	cell division cycle 20 homolog (S. cerevisiae) pseudogene 1	-1.28063	7.17193e-16
ENSG00000185614	FAM212A	family with sequence similarity 212, member A	-3.0257	2.65792e-52
ENSG00000127530	OR7C1	olfactory receptor, family 7, subfamily C, member 1	-3.81892	8.57071e-50
ENSG00000169018	FEM1B	fem-1 homolog b (C. elegans)	-1.58	7.45671e-124
ENSG00000112139	MDGA1	MAM domain containing glycosylphosphatidylinositol anchor 1	-2.7938	2.34559e-172
ENSG00000157456	CCNB2	cyclin B2	-1.48107	1.30835e-234
ENSG00000132130	LHX1	LIM homeobox 1	-1.54316	3.7651e-19
ENSG00000255302	EID1	EP300 interacting inhibitor of differentiation 1	-2.38137	8.15321e-300
ENSG00000104147	OIP5	Opa interacting protein 5	-1.31255	7.84897e-60
ENSG00000188677	PARVB	parvin, beta	-2.59952	0
ENSG00000143603	KCNN3	potassium intermediate/small conductance calcium-activated channel, subfamily N, member 3	-3.80575	2.39194e-41
ENSG00000122735	DNAI1	dynein, axonemal, intermediate chain 1	-1.92968	4.52881e-29
ENSG00000141959	PFKL	phosphofructokinase, liver	-1.24979	4.30907e-152
ENSG00000172264	MACROD2	MACRO domain containing 2	-1.08816	2.66036e-24
ENSG00000229771	RP4-644L1.2		-3.7857	4.37957e-47
ENSG00000176890	TYMS	thymidylate synthetase	-1.60542	4.3405e-68
ENSG00000260880	RP11-346C20.2		-1.56606	6.55112e-13
ENSG00000108298	RPL19	ribosomal protein L19	-1.62455	6.18574e-219
ENSG00000011426	ANLN	anillin, actin binding protein	-1.80832	8.05487e-160
ENSG00000130775	THEMIS2	thymocyte selection associated family member 2	-3.29065	6.26062e-126
ENSG00000177098	SCN4B	sodium channel, voltage-gated, type IV, beta subunit	-3.28501	1.25695e-09
ENSG00000258657	RP11-104E19.1		-1.78473	1.00557e-11
ENSG00000263053	RP11-1055B8.6		-1.76923	3.98786e-63
ENSG00000140451	PIF1	PIF1 5'-to-3' DNA helicase homolog (S. cerevisiae)	-1.69557	7.57946e-72
ENSG00000123095	BHLHE41	basic helix-loop-helix family, member e41	-3.05689	1.08371e-208
ENSG00000110427	KIAA1549L	KIAA1549-like	-1.48294	6.31215e-122
ENSG00000225353	RP11-292F9.1		-4.28002	1.59135e-60
ENSG00000142731	PLK4	polo-like kinase 4	-1.46964	7.80332e-135
ENSG00000204876	AC021218.2	Uncharacterized protein	-2.51062	2.9786e-55
ENSG00000134852	CLOCK	clock homolog (mouse)	-1.38569	1.02346e-112
ENSG00000142102	ATHL1	ATH1, acid trehalase-like 1 (yeast)	-4.07108	0
ENSG00000137203	TFAP2A	transcription factor AP-2 alpha (activating enhancer binding protein 2 alpha)	-1.17788	1.78341e-165
ENSG00000139679	LPAR6	lysophosphatidic acid receptor 6	-1.36328	4.00639e-45
ENSG00000157193	LRP8	low density lipoprotein receptor-related protein 8, apolipoprotein e receptor	-2.66166	0
ENSG00000235609	AF127936.7		-1.25275	0.0020178
ENSG00000136040	PLXNC1	plexin C1	-3.52382	0
ENSG00000185760	KCNQ5	potassium voltage-gated channel, KQT-like subfamily, member 5	-2.42036	0
ENSG00000173894	CBX2	chromobox homolog 2	-1.1294	2.32615e-73
ENSG00000139971	C14orf37	chromosome 14 open reading frame 37	-3.14721	8.82381e-198
ENSG00000140386	SCAPER	S-phase cyclin A-associated protein in the ER	-1.26051	1.25907e-66
ENSG00000230055	CISD3	CDGSH iron sulfur domain 3	-1.22789	7.6599e-48
ENSG00000102910	LONP2	lon peptidase 2, peroxisomal	-1.45549	1.62467e-67
ENSG00000106789	CORO2A	coronin, actin binding protein, 2A	-1.90796	5.23196e-54
ENSG00000260776	RP11-114H24.2		-1.87554	6.70582e-29
ENSG00000178950	GAK	cyclin G associated kinase	-1.26328	1.22995e-67
ENSG00000228288	KDM5B-AS1	KDM5B antisense RNA 1	-1.73719	1.64623e-47
ENSG00000137103	TMEM8B	transmembrane protein 8B	-1.29416	3.22335e-53
ENSG00000131409	LRRC4B	leucine rich repeat containing 4B	-1.30182	2.75583e-10
ENSG00000135587	SMPD2	sphingomyelin phosphodiesterase 2, neutral membrane (neutral sphingomyelinase)	-1.36748	6.16224e-52
ENSG00000151240	DIP2C	DIP2 disco-interacting protein 2 homolog C (Drosophila)	-2.40047	0
ENSG00000187905	AC002472.13	Leucine-rich repeat-containing protein LOC400891	-1.49323	5.27217e-12
ENSG00000146918	NCAPG2	non-SMC condensin II complex, subunit G2	-1.75412	0
ENSG00000173207	CKS1B	CDC28 protein kinase regulatory subunit 1B	-1.31904	7.85424e-59
ENSG00000231367	AC016995.3		-1.33876	3.49101e-11
ENSG00000178445	GLDC	glycine dehydrogenase (decarboxylating)	-1.50718	0.00134579
ENSG00000266602	RP11-476K15.1		-1.71819	6.94008e-24
ENSG00000114316	USP4	ubiquitin specific peptidase 4 (proto-oncogene)	-1.19092	1.37345e-263
ENSG00000135299	ANKRD6	ankyrin repeat domain 6	-1.16617	2.61144e-76
ENSG00000187742	SECISBP2	SECIS binding protein 2	-1.16128	3.30263e-71
ENSG00000184661	CDCA2	cell division cycle associated 2	-1.34379	7.60108e-108
ENSG00000136457	CHAD	chondroadherin	-2.07098	9.18896e-42
ENSG00000040633	PHF23	PHD finger protein 23	-1.1554	6.85808e-129
ENSG00000178722	C5orf64	chromosome 5 open reading frame 64	-3.14994	2.18119e-36
ENSG00000142694	FAM176B	family with sequence similarity 176, member B	-1.39327	5.3122e-63
ENSG00000241316	RP11-81N13.1		-1.23577	3.89414e-11
ENSG00000187098	MITF	microphthalmia-associated transcription factor	-1.57108	7.21882e-60
ENSG00000134954	ETS1	v-ets erythroblastosis virus E26 oncogene homolog 1 (avian)	-1.1335	1.42079e-105
ENSG00000169224	GCSAML	germinal center-associated, signaling and motility-like	-4.49678	8.44067e-48
ENSG00000257277	RP11-434H14.1		-4.26046	2.97957e-38
ENSG00000142233	NTN5	netrin 5	-1.0171	3.13743e-13
ENSG00000071073	MGAT4A	mannosyl (alpha-1,3-)-glycoprotein beta-1,4-N-acetylglucosaminyltransferase, isozyme A	-2.04561	2.98004e-68
ENSG00000184113	CLDN5	claudin 5	-1.05618	3.73628e-11
ENSG00000130475	FCHO1	FCH domain only 1	-1.39841	2.19032e-27
ENSG00000137558	PI15	peptidase inhibitor 15	-1.18399	1.12729e-18
ENSG00000118298	CA14	carbonic anhydrase XIV	-1.6748	1.6503e-72
ENSG00000162894	FAIM3	Fas apoptotic inhibitory molecule 3	-2.60135	7.14444e-74
ENSG00000104055	TGM5	transglutaminase 5	-4.95672	1.81591e-52
ENSG00000161835	GRASP	GRP1 (general receptor for phosphoinositides 1)-associated scaffold protein	-1.4526	1.89016e-77
ENSG00000249465	RBMXP4	RNA binding motif protein, X-linked pseudogene 4	-1.853	1.78434e-28
ENSG00000160284	C21orf56	chromosome 21 open reading frame 56	-2.05734	6.64406e-08
ENSG00000261780	CTD-2354A18.1		-1.6245	5.473e-17
ENSG00000138801	PAPSS1	3'-phosphoadenosine 5'-phosphosulfate synthase 1	-1.53259	6.7159e-202
ENSG00000185100	ADSSL1	adenylosuccinate synthase like 1	-2.66724	9.38726e-105
ENSG00000124177	CHD6	chromodomain helicase DNA binding protein 6	-1.61787	6.59507e-101
ENSG00000267414	RP11-456K23.1		-1.60603	9.88589e-23
ENSG00000127948	POR	P450 (cytochrome) oxidoreductase	-1.03913	3.31124e-51
ENSG00000121621	KIF18A	kinesin family member 18A	-1.11839	5.6585e-86
ENSG00000148218	ALAD	aminolevulinate dehydratase	-1.041	1.10692e-217
ENSG00000111674	ENO2	enolase 2 (gamma, neuronal)	-1.74832	1.87179e-256
ENSG00000142082	SIRT3	sirtuin 3	-1.24741	6.24497e-77
ENSG00000142192	APP	amyloid beta (A4) precursor protein	-1.61089	7.16127e-196
ENSG00000105696	TMEM59L	transmembrane protein 59-like	-2.852	2.8956e-52
ENSG00000130755	GMFG	glia maturation factor, gamma	-2.58566	1.04137e-32
ENSG00000136143	SUCLA2	succinate-CoA ligase, ADP-forming, beta subunit	-1.39151	3.79886e-173
ENSG00000069424	KCNAB2	potassium voltage-gated channel, shaker-related subfamily, beta member 2	-3.65481	0
ENSG00000169683	LRRC45	leucine rich repeat containing 45	-1.94976	0
ENSG00000206417	H1FX-AS1	H1FX antisense RNA 1	-2.56163	1.3165e-32
ENSG00000141556	TBCD	tubulin folding cofactor D	-2.11071	0
ENSG00000183508	FAM46C	family with sequence similarity 46, member C	-1.61033	5.23443e-85
ENSG00000170832	USP32	ubiquitin specific peptidase 32	-1.64859	1.57464e-143
ENSG00000237864	LINC00322	long intergenic non-protein coding RNA 322	-2.06615	3.02564e-19
ENSG00000218510	LINC00339	long intergenic non-protein coding RNA 339	-1.66465	6.78525e-62
ENSG00000156381	ANKRD9	ankyrin repeat domain 9	-2.02571	2.55001e-200
ENSG00000148832	PAOX	polyamine oxidase (exo-N4-amino)	-2.19395	0.000120782
ENSG00000203814	HIST2H2BF	histone cluster 2, H2bf	-1.34154	1.5525e-07
ENSG00000169762	TAPT1	transmembrane anterior posterior transformation 1	-2.03611	2.62178e-280
ENSG00000198053	SIRPA	signal-regulatory protein alpha	-1.06036	3.41524e-60
ENSG00000130528	HRC	histidine rich calcium binding protein	-3.93223	8.74198e-31
ENSG00000197150	ABCB8	ATP-binding cassette, sub-family B (MDR/TAP), member 8	-1.14064	3.66783e-68
ENSG00000255119	RP11-655M14.12		-2.38337	8.6304e-29
ENSG00000237940	AC093642.3		-1.81388	2.77517e-20
ENSG00000230910	RP3-525N10.2		-1.13256	2.70725e-12
ENSG00000246339	EXTL3-AS1	EXTL3 antisense RNA 1	-1.17279	3.09295e-16
ENSG00000205702	CYP2D7P1	cytochrome P450, family 2, subfamily D, polypeptide 7 pseudogene 1	-1.70142	3.64754e-27
ENSG00000115828	QPCT	glutaminyl-peptide cyclotransferase	-2.11006	7.19048e-208
ENSG00000244607	CCDC13	coiled-coil domain containing 13	-1.05021	1.33497e-06
ENSG00000204632	HLA-G	major histocompatibility complex, class I, G	-2.33321	1.25757e-264
ENSG00000163808	KIF15	kinesin family member 15	-1.58027	6.7628e-129
ENSG00000163016	ALMS1P	Alstrom syndrome 1 pseudogene	-2.57268	5.20394e-50
ENSG00000140009	ESR2	estrogen receptor 2 (ER beta)	-1.16363	4.33031e-33
ENSG00000165914	TTC7B	tetratricopeptide repeat domain 7B	-1.12409	6.48749e-54
ENSG00000124839	RAB17	RAB17, member RAS oncogene family	-1.61191	1.93458e-168
ENSG00000115317	HTRA2	HtrA serine peptidase 2	-1.26105	2.42896e-104
ENSG00000101997	CCDC22	coiled-coil domain containing 22	-1.07554	2.95593e-43
ENSG00000248746	ACTN3	actinin, alpha 3	-1.44223	1.35488e-15
ENSG00000137809	ITGA11	integrin, alpha 11	-3.5477	2.26396e-31
ENSG00000145882	PCYOX1L	prenylcysteine oxidase 1 like	-2.09672	1.67586e-166
ENSG00000236673	RP11-69I8.2		-1.10729	1.76271e-08
ENSG00000176894	PXMP2	peroxisomal membrane protein 2, 22kDa	-1.29175	3.33139e-34
ENSG00000135916	ITM2C	integral membrane protein 2C	-1.51642	2.62864e-228
ENSG00000188385	JAKMIP3	Janus kinase and microtubule interacting protein 3	-1.81547	0.000865999
ENSG00000204791	CTD-3065J16.6		-3.12953	1.3753e-33
ENSG00000023902	PLEKHO1	pleckstrin homology domain containing, family O member 1	-1.63453	2.42896e-104
ENSG00000154359	LONRF1	LON peptidase N-terminal domain and ring finger 1	-2.31985	0
ENSG00000197462	AC005276.1		-1.62515	8.09598e-13
ENSG00000152240	HAUS1	HAUS augmin-like complex, subunit 1	-1.45192	9.58258e-40
ENSG00000259781	RP11-673C5.1		-1.46872	0.00749186
ENSG00000140259	MFAP1	microfibrillar-associated protein 1	-1.06158	1.41443e-75
ENSG00000146285	SCML4	sex comb on midleg-like 4 (Drosophila)	-2.30313	2.29021e-33
ENSG00000249274	RP11-319J24.3		-1.48433	2.3545e-26
ENSG00000264063	MIR3687	microRNA 3687	-1.02348	7.16318e-06
ENSG00000205593	FAM116B	family with sequence similarity 116, member B	-2.78396	1.06661e-99
ENSG00000205832	C16orf96	chromosome 16 open reading frame 96	-1.17051	2.59082e-09
ENSG00000124818	OPN5	opsin 5	-3.19585	3.72576e-32
ENSG00000141965	FEM1A	fem-1 homolog a (C. elegans)	-1.06328	3.37287e-43
ENSG00000154025	SLC5A10	solute carrier family 5 (sodium/glucose cotransporter), member 10	-4.35353	1.66947e-71
ENSG00000174684	B3GNT1	UDP-GlcNAc:betaGal beta-1,3-N-acetylglucosaminyltransferase 1	-2.4214	0
ENSG00000100714	MTHFD1	methylenetetrahydrofolate dehydrogenase (NADP+ dependent) 1, methenyltetrahydrofolate cyclohydrolase, formyltetrahydrofolate synthetase	-1.16503	4.35892e-44
ENSG00000167701	GPT	glutamic-pyruvate transaminase (alanine aminotransferase)	-1.80198	7.64301e-51
ENSG00000114346	ECT2	epithelial cell transforming sequence 2 oncogene	-2.66167	5.34163e-274
ENSG00000069702	TGFBR3	transforming growth factor, beta receptor III	-2.0157	2.77974e-126
ENSG00000097007	ABL1	c-abl oncogene 1, non-receptor tyrosine kinase	-1.17381	7.24298e-104
ENSG00000107317	PTGDS	prostaglandin D2 synthase 21kDa (brain)	-6.32019	4.57266e-30
ENSG00000221968	FADS3	fatty acid desaturase 3	-2.22927	3.68907e-231
ENSG00000182504	CEP97	centrosomal protein 97kDa	-1.05572	1.19621e-66
ENSG00000119227	PIGZ	phosphatidylinositol glycan anchor biosynthesis, class Z	-3.4643	6.48737e-179
ENSG00000180672	AC007362.1		-4.2758	0
ENSG00000079246	XRCC5	X-ray repair complementing defective repair in Chinese hamster cells 5 (double-strand-break rejoining)	-1.02846	7.23006e-100
ENSG00000145819	ARHGAP26	Rho GTPase activating protein 26	-1.23004	1.7593e-99
ENSG00000007968	E2F2	E2F transcription factor 2	-1.12945	2.35246e-29
ENSG00000227242	RP11-325P15.3		-2.18258	2.06032e-23
ENSG00000155592	ZKSCAN2	zinc finger with KRAB and SCAN domains 2	-1.66609	7.16208e-79
ENSG00000142534	RPS11	ribosomal protein S11	-1.43845	7.52734e-129
ENSG00000028203	VEZT	vezatin, adherens junctions transmembrane protein	-1.60435	5.09125e-180
ENSG00000185133	INPP5J	inositol polyphosphate-5-phosphatase J	-1.73053	1.21163e-24
ENSG00000223501	VPS52	vacuolar protein sorting 52 homolog (S. cerevisiae)	-1.13414	5.98803e-138
ENSG00000197006	METTL9	methyltransferase like 9	-1.43763	8.70757e-109
ENSG00000100726	TELO2	TEL2, telomere maintenance 2, homolog (S. cerevisiae)	-1.6965	1.06067e-71
ENSG00000137507	LRRC32	leucine rich repeat containing 32	-4.84702	6.73828e-32
ENSG00000188649	CC2D2B	coiled-coil and C2 domain containing 2B	-3.63559	1.05669e-33
ENSG00000067900	ROCK1	Rho-associated, coiled-coil containing protein kinase 1	-1.61217	1.07797e-154
ENSG00000104763	ASAH1	N-acylsphingosine amidohydrolase (acid ceramidase) 1	-2.23929	0
ENSG00000214140	PRCD	progressive rod-cone degeneration	-2.03883	1.4582e-84
ENSG00000155903	RASA2	RAS p21 protein activator 2	-1.36527	2.54351e-221
ENSG00000236544	AC008060.8		-2.97992	3.18006e-31
ENSG00000125788	DEFB126	defensin, beta 126	-2.30347	0.000905593
ENSG00000198892	SHISA4	shisa homolog 4 (Xenopus laevis)	-1.48836	1.01339e-44
ENSG00000155367	PPM1J	protein phosphatase, Mg2+/Mn2+ dependent, 1J	-1.80848	5.54436e-21
ENSG00000184922	FMNL1	formin-like 1	-2.08858	5.24075e-42
ENSG00000118193	KIF14	kinesin family member 14	-2.03534	0
ENSG00000026297	RNASET2	ribonuclease T2	-1.18881	3.34162e-98
ENSG00000175283	DOLK	dolichol kinase	-1.37574	1.36124e-205
ENSG00000064886	CHI3L2	chitinase 3-like 2	-2.04594	7.71435e-25
ENSG00000088812	ATRN	attractin	-1.32451	1.88144e-152
ENSG00000171227	TMEM37	transmembrane protein 37	-3.18419	3.79048e-25
ENSG00000189171	S100A13	S100 calcium binding protein A13	-1.38232	5.47128e-70
ENSG00000205456	AC133485.1	TP53-target gene 3 protein-like	-1.9776	1.28872e-42
ENSG00000117859	OSBPL9	oxysterol binding protein-like 9	-1.38768	1.65033e-143
ENSG00000092931	MFSD11	major facilitator superfamily domain containing 11	-1.05145	3.93367e-83
ENSG00000109927	TECTA	tectorin alpha	-1.55551	4.13373e-11
ENSG00000087245	MMP2	matrix metallopeptidase 2 (gelatinase A, 72kDa gelatinase, 72kDa type IV collagenase)	-3.11727	1.28074e-126
ENSG00000137449	CPEB2	cytoplasmic polyadenylation element binding protein 2	-1.38172	2.98983e-147
ENSG00000233388	RP4-569D19.5		-1.26003	7.05211e-11
ENSG00000228889	UBAC2-AS1	UBAC2 antisense RNA 1	-1.26733	4.83343e-30
ENSG00000072501	SMC1A	structural maintenance of chromosomes 1A	-1.17554	2.99087e-52
ENSG00000236081	AC074389.9		-1.20521	2.56065e-10
ENSG00000141084	RANBP10	RAN binding protein 10	-1.2217	3.68749e-114
ENSG00000164330	EBF1	early B-cell factor 1	-1.90795	1.54026e-21
ENSG00000102385	DRP2	dystrophin related protein 2	-1.30491	3.44792e-13
ENSG00000056998	GYG2	glycogenin 2	-2.09291	1.54527e-235
ENSG00000173950	XXYLT1	xyloside xylosyltransferase 1	-1.20953	1.05009e-133
ENSG00000100697	DICER1	dicer 1, ribonuclease type III	-1.47054	9.22593e-67
ENSG00000168078	PBK	PDZ binding kinase	-1.91489	0
ENSG00000175463	TBC1D10C	TBC1 domain family, member 10C	-2.57395	1.75346e-29
ENSG00000184368	MAP7D2	MAP7 domain containing 2	-1.01474	6.08856e-09
ENSG00000099365	STX1B	syntaxin 1B	-1.18049	2.17361e-15
ENSG00000172531	PPP1CA	protein phosphatase 1, catalytic subunit, alpha isozyme	-1.26738	7.13324e-128
ENSG00000109610	SOD3	superoxide dismutase 3, extracellular	-3.78325	1.78732e-34
ENSG00000065243	PKN2	protein kinase N2	-1.13897	5.48227e-83
ENSG00000153774	CFDP1	craniofacial development protein 1	-1.07421	1.74905e-165
ENSG00000198743	SLC5A3	solute carrier family 5 (sodium/myo-inositol cotransporter), member 3	-1.79479	4.14694e-157
ENSG00000068784	SRBD1	S1 RNA binding domain 1	-1.26921	6.45635e-86
ENSG00000138413	IDH1	isocitrate dehydrogenase 1 (NADP+), soluble	-1.53928	2.10673e-102
ENSG00000266208	CTD-2267D19.3		-1.83942	0.0284861
ENSG00000155974	GRIP1	glutamate receptor interacting protein 1	-1.34185	4.6866e-07
ENSG00000214063	TSPAN4	tetraspanin 4	-1.12027	2.42367e-92
ENSG00000229195	AC009495.4		-2.19938	8.3911e-15
ENSG00000113504	SLC12A7	solute carrier family 12 (potassium/chloride transporters), member 7	-1.11673	1.75556e-40
ENSG00000104888	SLC17A7	solute carrier family 17 (sodium-dependent inorganic phosphate cotransporter), member 7	-2.45108	1.83992e-65
ENSG00000007237	GAS7	growth arrest-specific 7	-2.87787	0
ENSG00000216490	IFI30	interferon, gamma-inducible protein 30	-3.01004	2.22209e-164
ENSG00000033100	CHPF2	chondroitin polymerizing factor 2	-1.5196	1.33837e-58
ENSG00000051382	PIK3CB	phosphatidylinositol-4,5-bisphosphate 3-kinase, catalytic subunit beta	-2.08483	7.48178e-182
ENSG00000181284	TMEM102	transmembrane protein 102	-1.04808	2.48808e-17
ENSG00000143398	PIP5K1A	phosphatidylinositol-4-phosphate 5-kinase, type I, alpha	-1.0911	0
ENSG00000260456	C16orf95	Uncharacterized protein C16orf95	-2.18761	1.50454e-30
ENSG00000126353	CCR7	chemokine (C-C motif) receptor 7	-3.3103	1.39271e-34
ENSG00000128284	APOL3	apolipoprotein L, 3	-3.26291	1.81055e-30
ENSG00000196642	RABL6	RAB, member RAS oncogene family-like 6	-1.70601	3.20892e-115
ENSG00000162591	MEGF6	multiple EGF-like-domains 6	-1.22629	9.72754e-13
ENSG00000109805	NCAPG	non-SMC condensin I complex, subunit G	-1.20579	1.48154e-54
ENSG00000047346	FAM214A	family with sequence similarity 214, member A	-1.0474	5.68845e-104
ENSG00000198954	KIAA1279	KIAA1279	-1.01169	1.36505e-123
ENSG00000196482	ESRRG	estrogen-related receptor gamma	-1.43649	3.97136e-21
ENSG00000183458	RP11-958N24.1		-1.36841	1.28611e-45
ENSG00000101265	RASSF2	Ras association (RalGDS/AF-6) domain family member 2	-1.9866	1.22953e-185
ENSG00000142875	PRKACB	protein kinase, cAMP-dependent, catalytic, beta	-1.85591	2.08433e-172
ENSG00000012223	LTF	lactotransferrin	-1.14055	2.60968e-07
ENSG00000118322	ATP10B	ATPase, class V, type 10B	-1.46463	1.05765e-19
ENSG00000167513	CDT1	chromatin licensing and DNA replication factor 1	-1.15844	7.06927e-22
ENSG00000168827	GFM1	G elongation factor, mitochondrial 1	-1.72459	1.18958e-240
ENSG00000090554	FLT3LG	fms-related tyrosine kinase 3 ligand	-1.50717	1.46603e-17
ENSG00000139044	B4GALNT3	beta-1,4-N-acetyl-galactosaminyl transferase 3	-1.78025	3.98385e-11
ENSG00000090565	RAB11FIP3	RAB11 family interacting protein 3 (class II)	-1.03927	4.25626e-108
ENSG00000099957	P2RX6	purinergic receptor P2X, ligand-gated ion channel, 6	-2.97076	1.40525e-120
ENSG00000145476	CYP4V2	cytochrome P450, family 4, subfamily V, polypeptide 2	-1.1657	1.82033e-71
ENSG00000127483	HP1BP3	heterochromatin protein 1, binding protein 3	-1.53346	0
ENSG00000196666	FAM180B	family with sequence similarity 180, member B	-1.85779	9.79023e-32
ENSG00000111886	GABRR2	gamma-aminobutyric acid (GABA) A receptor, rho 2	-1.00692	6.17164e-05
ENSG00000021762	OSBPL5	oxysterol binding protein-like 5	-1.0964	1.09449e-46
ENSG00000162434	JAK1	Janus kinase 1	-1.44704	0
ENSG00000176533	GNG7	guanine nucleotide binding protein (G protein), gamma 7	-1.32202	1.52319e-75
ENSG00000005893	LAMP2	lysosomal-associated membrane protein 2	-1.29871	4.03174e-122
ENSG00000196396	PTPN1	protein tyrosine phosphatase, non-receptor type 1	-2.14664	0
ENSG00000170962	PDGFD	platelet derived growth factor D	-1.93355	5.91533e-61
ENSG00000241697	TMEFF1	transmembrane protein with EGF-like and two follistatin-like domains 1	-3.07635	1.31517e-47
ENSG00000232119	MCTS1	malignant T cell amplified sequence 1	-1.05134	2.90872e-22
ENSG00000074696	PTPLAD1	protein tyrosine phosphatase-like A domain containing 1	-1.01878	3.0705e-54
ENSG00000134982	APC	adenomatous polyposis coli	-1.42499	1.19583e-119
ENSG00000117650	NEK2	NIMA (never in mitosis gene a)-related kinase 2	-1.2626	5.06637e-153
ENSG00000182973	CNOT10	CCR4-NOT transcription complex, subunit 10	-1.06129	4.96324e-153
ENSG00000063015	SEZ6	seizure related 6 homolog (mouse)	-1.56271	3.61892e-15
ENSG00000092010	PSME1	proteasome (prosome, macropain) activator subunit 1 (PA28 alpha)	-1.68554	3.94184e-272
ENSG00000164989	CCDC171	coiled-coil domain containing 171	-2.425	4.80181e-102
ENSG00000185129	PURA	purine-rich element binding protein A	-1.02109	1.69989e-112
ENSG00000164402	SEPT8	septin 8	-1.70969	8.22637e-141
ENSG00000136943	CTSL2	cathepsin L2	-1.14244	2.28555e-56
ENSG00000065060	UHRF1BP1	UHRF1 binding protein 1	-1.28243	2.39457e-40
ENSG00000111783	RFX4	regulatory factor X, 4 (influences HLA class II expression)	-2.92228	3.88631e-28
ENSG00000103047	TMCO7	transmembrane and coiled-coil domains 7	-1.38775	9.16235e-69
ENSG00000137491	SLCO2B1	solute carrier organic anion transporter family, member 2B1	-3.07165	8.43067e-29
ENSG00000123106	CCDC91	coiled-coil domain containing 91	-1.82934	6.84047e-85
ENSG00000177054	ZDHHC13	zinc finger, DHHC-type containing 13	-1.82171	1.3098e-158
ENSG00000234502	FYTTD1P1	forty-two-three domain containing 1 pseudogene 1	-1.08473	3.13695e-06
ENSG00000174080	CTSF	cathepsin F	-3.30021	0
ENSG00000102904	TSNAXIP1	translin-associated factor X interacting protein 1	-1.50668	4.58738e-36
ENSG00000126870	WDR60	WD repeat domain 60	-1.048	1.81166e-107
ENSG00000197355	UAP1L1	UDP-N-acteylglucosamine pyrophosphorylase 1-like 1	-1.60143	2.1448e-94
ENSG00000138380	ALS2CR8	amyotrophic lateral sclerosis 2 (juvenile) chromosome region, candidate 8	-1.87232	8.13665e-38
ENSG00000067992	PDK3	pyruvate dehydrogenase kinase, isozyme 3	-2.7067	0
ENSG00000163939	PBRM1	polybromo 1	-2.36646	6.30991e-268
ENSG00000142606	MMEL1	membrane metallo-endopeptidase-like 1	-5.68918	2.30372e-26
ENSG00000075826	SEC31B	SEC31 homolog B (S. cerevisiae)	-1.9135	6.98738e-103
ENSG00000126259	KIRREL2	kin of IRRE like 2 (Drosophila)	-2.26043	0.000275187
ENSG00000146122	DAAM2	dishevelled associated activator of morphogenesis 2	-1.37657	4.13617e-156
ENSG00000205634	RP11-191L9.6		-1.58589	5.50534e-14
ENSG00000171282	BAHCC1	BAH domain and coiled-coil containing 1	-2.6293	0
ENSG00000013523	ANGEL1	angel homolog 1 (Drosophila)	-1.14833	2.84371e-197
ENSG00000145386	CCNA2	cyclin A2	-1.08591	1.92593e-55
ENSG00000134909	ARHGAP32	Rho GTPase activating protein 32	-1.12595	8.07012e-75
ENSG00000261594	TPBGL	trophoblast glycoprotein-like	-1.83476	9.5739e-15
ENSG00000062038	CDH3	cadherin 3, type 1, P-cadherin (placental)	-1.80668	3.91648e-124
ENSG00000152402	GUCY1A2	guanylate cyclase 1, soluble, alpha 2	-1.92554	2.88476e-47
ENSG00000101846	STS	steroid sulfatase (microsomal), isozyme S	-1.01904	8.60299e-30
ENSG00000182580	EPHB3	EPH receptor B3	-1.89828	1.01772e-25
ENSG00000171723	GPHN	gephyrin	-1.45001	3.13214e-86
ENSG00000117090	SLAMF1	signaling lymphocytic activation molecule family member 1	-4.06229	1.56085e-31
ENSG00000132429	POPDC3	popeye domain containing 3	-1.05206	1.15695e-34
ENSG00000145348	TBCK	TBC1 domain containing kinase	-1.17838	8.13044e-110
ENSG00000164976	KIAA1161	KIAA1161	-1.83786	3.16732e-104
ENSG00000006715	VPS41	vacuolar protein sorting 41 homolog (S. cerevisiae)	-1.19784	3.77842e-182
ENSG00000138160	KIF11	kinesin family member 11	-1.59127	1.61315e-87
ENSG00000168310	IRF2	interferon regulatory factor 2	-1.24911	7.62703e-112
ENSG00000234011	RP3-461P17.10		-1.70031	1.27269e-20
ENSG00000136099	PCDH8	protocadherin 8	-1.34251	2.82735e-11
ENSG00000173486	FKBP2	FK506 binding protein 2, 13kDa	-1.34741	5.45642e-126
ENSG00000169629	RGPD8	RANBP2-like and GRIP domain containing 8	-2.33894	7.64898e-31
ENSG00000143369	ECM1	extracellular matrix protein 1	-3.87382	0
ENSG00000196776	CD47	CD47 molecule	-1.09519	8.94443e-69
ENSG00000184557	SOCS3	suppressor of cytokine signaling 3	-1.1593	8.94027e-30
ENSG00000184343	SRPK3	SRSF protein kinase 3	-1.16943	2.07821e-20
ENSG00000239235	AC008280.5		-1.12114	3.22333e-24
ENSG00000231527	RP11-374M1.2		-3.29789	4.21564e-29
ENSG00000116678	LEPR	leptin receptor	-1.44662	4.28155e-29
ENSG00000185010	F8	coagulation factor VIII, procoagulant component	-1.21695	5.73901e-05
ENSG00000123201	GUCY1B2	guanylate cyclase 1, soluble, beta 2 (pseudogene)	-1.82608	1.89053e-17
ENSG00000078804	TP53INP2	tumor protein p53 inducible nuclear protein 2	-1.8228	1.74606e-298
ENSG00000038002	AGA	aspartylglucosaminidase	-2.05766	3.69534e-152
ENSG00000226869	LHFPL3-AS1	LHFPL3 antisense RNA 1	-3.3357	1.86239e-148
ENSG00000105639	JAK3	Janus kinase 3	-1.78451	2.80105e-25
ENSG00000251584	RP11-440I14.3		-1.50508	1.26814e-14
ENSG00000101773	RBBP8	retinoblastoma binding protein 8	-1.09052	9.46839e-22
ENSG00000139946	PELI2	pellino E3 ubiquitin protein ligase family member 2	-1.13174	3.6606e-25
ENSG00000243317	C7orf73	chromosome 7 open reading frame 73	-1.12119	1.72458e-123
ENSG00000121064	SCPEP1	serine carboxypeptidase 1	-2.28561	0
ENSG00000130822	PNCK	pregnancy up-regulated non-ubiquitously expressed CaM kinase	-3.02157	2.51097e-42
ENSG00000198718	FAM179B	family with sequence similarity 179, member B	-1.6577	2.66332e-150
ENSG00000254350	RP11-542A14.1		-3.07444	7.64049e-30
ENSG00000131941	RHPN2	rhophilin, Rho GTPase binding protein 2	-1.81752	8.2455e-177
ENSG00000063601	MTMR1	myotubularin related protein 1	-1.01027	5.52784e-40
ENSG00000179083	FAM133A	family with sequence similarity 133, member A	-1.36819	1.89506e-13
ENSG00000149506	ZP1	zona pellucida glycoprotein 1 (sperm receptor)	-2.76261	5.36739e-26
ENSG00000171714	ANO5	anoctamin 5	-1.80693	1.02347e-63
ENSG00000107864	CPEB3	cytoplasmic polyadenylation element binding protein 3	-1.07238	1.75568e-28
ENSG00000228246	AC006028.9		-1.12572	7.75457e-17
ENSG00000250914	RP11-1084J3.1		-2.04881	1.41312e-18
ENSG00000116586	LAMTOR2	late endosomal/lysosomal adaptor, MAPK and MTOR activator 2	-1.09798	8.7663e-46
ENSG00000101350	KIF3B	kinesin family member 3B	-1.39742	2.0544e-292
ENSG00000250784	RP11-540D14.6		-1.05631	3.55897e-10
ENSG00000223949	RP11-24J23.2		-2.47848	2.4444e-47
ENSG00000169856	ONECUT1	one cut homeobox 1	-1.11513	1.33197e-12
ENSG00000010319	SEMA3G	sema domain, immunoglobulin domain (Ig), short basic domain, secreted, (semaphorin) 3G	-2.96054	1.2901e-25
ENSG00000086504	MRPL28	mitochondrial ribosomal protein L28	-1.53631	8.16485e-180
ENSG00000115163	CENPA	centromere protein A	-1.11495	1.83544e-30
ENSG00000084207	GSTP1	glutathione S-transferase pi 1	-1.06215	1.17388e-58
ENSG00000138030	KHK	ketohexokinase (fructokinase)	-1.5361	1.07938e-57
ENSG00000023516	AKAP11	A kinase (PRKA) anchor protein 11	-1.57161	2.918e-143
ENSG00000197724	PHF2	PHD finger protein 2	-1.38953	1.80599e-87
ENSG00000151287	TEX30	testis expressed 30	-1.06894	3.35068e-133
ENSG00000225485	ARHGAP23	Rho GTPase activating protein 23	-1.41858	1.58942e-49
ENSG00000103599	IQCH	IQ motif containing H	-1.53737	1.90671e-20
ENSG00000166189	HPS6	Hermansky-Pudlak syndrome 6	-1.22186	1.33247e-144
ENSG00000184986	TMEM121	transmembrane protein 121	-2.46523	2.40196e-53
ENSG00000231064	RP11-263K19.4		-1.44679	5.24706e-15
ENSG00000015413	DPEP1	dipeptidase 1 (renal)	-3.56675	7.56414e-29
ENSG00000231441	RP11-472M19.2		-1.60189	2.63224e-10
ENSG00000120437	ACAT2	acetyl-CoA acetyltransferase 2	-1.46677	3.77963e-136
ENSG00000119397	CNTRL	centriolin	-1.83192	1.44633e-153
ENSG00000176410	DNAJC30	DnaJ (Hsp40) homolog, subfamily C, member 30	-1.36496	1.81844e-38
ENSG00000103507	BCKDK	branched chain ketoacid dehydrogenase kinase	-1.13466	2.07513e-112
ENSG00000116199	FAM20B	family with sequence similarity 20, member B	-1.37268	1.258e-103
ENSG00000108784	NAGLU	N-acetylglucosaminidase, alpha	-2.35187	6.89876e-290
ENSG00000168067	MAP4K2	mitogen-activated protein kinase kinase kinase kinase 2	-1.32387	4.58791e-108
ENSG00000172270	BSG	basigin (Ok blood group)	-1.08464	6.24673e-89
ENSG00000203879	GDI1	GDP dissociation inhibitor 1	-1.05934	7.71881e-250
ENSG00000266236	RP13-991F5.4		-1.58333	6.05084e-12
ENSG00000105711	SCN1B	sodium channel, voltage-gated, type I, beta subunit	-2.52588	8.87471e-44
ENSG00000124155	PIGT	phosphatidylinositol glycan anchor biosynthesis, class T	-1.1377	7.97108e-116
ENSG00000029993	HMGB3	high mobility group box 3	-1.65055	1.43317e-82
ENSG00000205036	C16orf85	chromosome 16 open reading frame 85	-1.55946	1.45253e-28
ENSG00000224825	RP11-171A24.3		-2.21233	1.59695e-27
ENSG00000101182	PSMA7	proteasome (prosome, macropain) subunit, alpha type, 7	-1.05214	2.3394e-167
ENSG00000237686	RP5-1120P11.1		-1.23893	1.85478e-07
ENSG00000141542	RAB40B	RAB40B, member RAS oncogene family	-1.24313	2.31713e-71
ENSG00000088881	EBF4	early B-cell factor 4	-2.87671	2.38864e-21
ENSG00000167112	TRUB2	TruB pseudouridine (psi) synthase homolog 2 (E. coli)	-1.13855	2.76553e-97
ENSG00000112033	PPARD	peroxisome proliferator-activated receptor delta	-1.14865	3.18573e-99
ENSG00000095970	TREM2	triggering receptor expressed on myeloid cells 2	-4.71421	3.80478e-26
ENSG00000144596	GRIP2	glutamate receptor interacting protein 2	-4.21677	4.22165e-25
ENSG00000139832	RAB20	RAB20, member RAS oncogene family	-2.04786	6.39499e-231
ENSG00000160050	CCDC28B	coiled-coil domain containing 28B	-1.12785	1.32077e-50
ENSG00000263154	RP11-1055B8.2		-1.65938	1.57796e-13
ENSG00000171885	AQP4	aquaporin 4	-3.22697	5.14652e-29
ENSG00000163449	TMEM169	transmembrane protein 169	-1.56805	3.21902e-12
ENSG00000241014	RP11-244H3.1		-1.77554	1.31037e-30
ENSG00000105220	GPI	glucose-6-phosphate isomerase	-1.1735	1.65532e-147
ENSG00000136982	DSCC1	defective in sister chromatid cohesion 1 homolog (S. cerevisiae)	-1.54775	6.77577e-49
ENSG00000171357	LURAP1	leucine rich adaptor protein 1	-1.85794	9.80191e-60
ENSG00000087076	HSD17B14	hydroxysteroid (17-beta) dehydrogenase 14	-1.68161	3.50586e-159
ENSG00000095002	MSH2	mutS homolog 2, colon cancer, nonpolyposis type 1 (E. coli)	-1.13405	1.29933e-54
ENSG00000174586	ZNF497	zinc finger protein 497	-1.03804	1.01364e-30
ENSG00000184524	CEND1	cell cycle exit and neuronal differentiation 1	-3.18122	4.23464e-37
ENSG00000168970	JMJD7-PLA2G4B	JMJD7-PLA2G4B readthrough	-1.21626	1.65576e-43
ENSG00000179163	FUCA1	fucosidase, alpha-L- 1, tissue	-1.43951	7.5703e-52
ENSG00000104889	RNASEH2A	ribonuclease H2, subunit A	-1.06447	4.1074e-121
ENSG00000170276	HSPB2	Heat shock protein beta-2	-2.93025	6.07565e-05
ENSG00000149311	ATM	ataxia telangiectasia mutated	-1.33938	9.67798e-44
ENSG00000005020	SKAP2	src kinase associated phosphoprotein 2	-1.65175	3.71619e-157
ENSG00000236714	AC005592.1		-1.69804	7.03361e-13
ENSG00000100526	CDKN3	cyclin-dependent kinase inhibitor 3	-1.31685	1.15902e-51
ENSG00000179314	WSCD1	WSC domain containing 1	-1.38756	8.90337e-15
ENSG00000171914	TLN2	talin 2	-2.23684	5.37444e-94
ENSG00000245694	CRNDE	colorectal neoplasia differentially expressed (non-protein coding)	-1.00066	6.07364e-19
ENSG00000165821	SALL2	sal-like 2 (Drosophila)	-3.30063	1.3184e-241
ENSG00000171368	TPPP	tubulin polymerization promoting protein	-2.07822	0
ENSG00000169220	RGS14	regulator of G-protein signaling 14	-1.32799	2.59243e-60
ENSG00000151233	GXYLT1	glucoside xylosyltransferase 1	-1.36705	1.44007e-120
ENSG00000166181	API5	apoptosis inhibitor 5	-1.03358	2.19782e-141
ENSG00000175147	C1orf126	chromosome 1 open reading frame 126	-1.44933	3.85608e-11
ENSG00000105679	GAPDHS	glyceraldehyde-3-phosphate dehydrogenase, spermatogenic	-3.79966	5.0681e-33
ENSG00000228158	TLE1P1	transducin-like enhancer of split 1 pseudogene 1	-1.43489	6.56297e-11
ENSG00000255774	AP000439.3		-1.83572	1.63718e-10
ENSG00000184831	APOO	apolipoprotein O	-1.44889	2.43116e-111
ENSG00000105875	WDR91	WD repeat domain 91	-2.11213	0
ENSG00000151503	NCAPD3	non-SMC condensin II complex, subunit D3	-1.39666	5.89612e-93
ENSG00000164076	CAMKV	CaM kinase-like vesicle-associated	-1.47488	9.09558e-11
ENSG00000006576	PHTF2	putative homeodomain transcription factor 2	-1.13545	1.26039e-72
ENSG00000228789	HCG22	HLA complex group 22 (non-protein coding)	-1.84544	1.38683e-11
ENSG00000183337	BCOR	BCL6 corepressor	-2.91506	7.29546e-220
ENSG00000226792	LINC00371	long intergenic non-protein coding RNA 371	-1.03086	1.80814e-05
ENSG00000197930	ERO1L	ERO1-like (S. cerevisiae)	-1.21911	7.19376e-125
ENSG00000095370	SH2D3C	SH2 domain containing 3C	-3.15379	8.87309e-28
ENSG00000151623	NR3C2	nuclear receptor subfamily 3, group C, member 2	-1.02244	1.18524e-08
ENSG00000068489	PRR11	proline rich 11	-1.89205	2.05767e-152
ENSG00000256594	RP11-705C15.2		-1.23844	1.50475e-34
ENSG00000185640	KRT79	keratin 79	-5.00131	4.79729e-35
ENSG00000176771	NCKAP5	NCK-associated protein 5	-2.00344	2.97707e-25
ENSG00000197959	DNM3	dynamin 3	-1.1825	7.23441e-45
ENSG00000247556	OIP5-AS1	OIP5 antisense RNA 1	-1.64259	9.88526e-149
ENSG00000100146	SOX10	SRY (sex determining region Y)-box 10	-2.4635	0
ENSG00000174456	C12orf76	chromosome 12 open reading frame 76	-1.11483	1.49144e-57
ENSG00000163629	PTPN13	protein tyrosine phosphatase, non-receptor type 13 (APO-1/CD95 (Fas)-associated phosphatase)	-1.54726	1.42423e-78
ENSG00000136275	C7orf69	chromosome 7 open reading frame 69	-1.46477	2.1727e-10
ENSG00000228157	AC007952.5	Uncharacterized protein ENSP00000382042	-2.12175	3.08618e-12
ENSG00000121879	PIK3CA	phosphatidylinositol-4,5-bisphosphate 3-kinase, catalytic subunit alpha	-1.31932	3.32879e-207
ENSG00000255518	RP11-148O21.4		-1.22343	1.13663e-07
ENSG00000153339	TRAPPC8	trafficking protein particle complex 8	-1.41784	1.0823e-181
ENSG00000042445	RETSAT	retinol saturase (all-trans-retinol 13,14-reductase)	-1.78588	1.39164e-104
ENSG00000171450	CDK5R2	cyclin-dependent kinase 5, regulatory subunit 2 (p39)	-2.36667	2.17549e-19
ENSG00000072163	LIMS2	LIM and senescent cell antigen-like domains 2	-1.9374	5.05566e-13
ENSG00000130720	FIBCD1	fibrinogen C domain containing 1	-1.17148	8.61544e-11
ENSG00000136738	STAM	signal transducing adaptor molecule (SH3 domain and ITAM motif) 1	-2.27756	0
ENSG00000126777	KTN1	kinectin 1 (kinesin receptor)	-2.43084	0
ENSG00000196782	MAML3	mastermind-like 3 (Drosophila)	-1.07282	5.62958e-34
ENSG00000249106	RP11-806K15.1		-2.92864	8.02003e-24
ENSG00000111790	FGFR1OP2	FGFR1 oncogene partner 2	-1.0896	3.52656e-59
ENSG00000070018	LRP6	low density lipoprotein receptor-related protein 6	-1.31402	1.36867e-276
ENSG00000146828	SLC12A9	solute carrier family 12 (potassium/chloride transporters), member 9	-1.29557	6.7555e-110
ENSG00000205188	AC002511.1		-2.86183	6.4148e-19
ENSG00000105642	KCNN1	potassium intermediate/small conductance calcium-activated channel, subfamily N, member 1	-2.34288	1.97382e-87
ENSG00000125124	BBS2	Bardet-Biedl syndrome 2	-1.00882	8.56754e-33
ENSG00000255354	RP11-148O21.2		-1.18127	1.82624e-06
ENSG00000176402	GJC3	gap junction protein, gamma 3, 30.2kDa	-2.22783	7.72198e-15
ENSG00000253301	RP11-513O17.2		-1.55853	4.82541e-08
ENSG00000116005	PCYOX1	prenylcysteine oxidase 1	-1.56658	3.76645e-79
ENSG00000090889	KIF4A	kinesin family member 4A	-1.48704	1.18008e-264
ENSG00000065054	SLC9A3R2	solute carrier family 9, subfamily A (NHE3, cation proton antiporter 3), member 3 regulator 2	-1.08304	4.41101e-25
ENSG00000146729	GBAS	glioblastoma amplified sequence	-1.99531	0
ENSG00000099797	TECR	trans-2,3-enoyl-CoA reductase	-2.09359	2.14433e-301
ENSG00000181085	MAPK15	mitogen-activated protein kinase 15	-2.90033	2.31756e-24
ENSG00000153283	CD96	CD96 molecule	-1.37189	5.26009e-05
ENSG00000119203	CPSF3	cleavage and polyadenylation specific factor 3, 73kDa	-1.27724	1.49595e-251
ENSG00000233077	RP11-290F20.2		-1.20282	1.63339e-07
ENSG00000223731	GS1-184P14.1		-2.99238	6.89106e-22
ENSG00000147526	TACC1	transforming, acidic coiled-coil containing protein 1	-2.40498	0
ENSG00000145354	CISD2	CDGSH iron sulfur domain 2	-1.46886	7.70241e-102
ENSG00000246982	RP1-179N16.6		-1.09317	1.63765e-07
ENSG00000164849	GPR146	G protein-coupled receptor 146	-1.15134	3.05637e-16
ENSG00000261269	RP11-389C8.2		-1.82432	9.17322e-12
ENSG00000163568	AIM2	absent in melanoma 2	-1.67323	0.0068587
ENSG00000205838	TTC23L	tetratricopeptide repeat domain 23-like	-1.01412	1.72271e-09
ENSG00000142677	IL22RA1	interleukin 22 receptor, alpha 1	-3.95029	8.63332e-21
ENSG00000100385	IL2RB	interleukin 2 receptor, beta	-1.92665	9.86072e-17
ENSG00000198832	RP3-412A9.11	selenoprotein M precursor	-1.6069	1.88914e-41
ENSG00000129353	SLC44A2	solute carrier family 44, member 2	-2.39214	0
ENSG00000168528	SERINC2	serine incorporator 2	-1.60279	4.07574e-24
ENSG00000106031	HOXA13	homeobox A13	-2.33206	5.23651e-96
ENSG00000165806	CASP7	caspase 7, apoptosis-related cysteine peptidase	-1.59652	0
ENSG00000103540	CCP110	centriolar coiled coil protein 110kDa	-1.36803	6.29181e-62
ENSG00000105643	ARRDC2	arrestin domain containing 2	-2.01996	7.2943e-260
ENSG00000139445	FOXN4	forkhead box N4	-1.26296	1.85675e-07
ENSG00000167371	PRRT2	proline-rich transmembrane protein 2	-2.01885	6.27407e-20
ENSG00000255148	RP4-791M13.4		-3.0426	8.53539e-17
ENSG00000152154	TMEM178A	transmembrane protein 178A	-1.9475	3.33651e-16
ENSG00000232445	RP11-132A1.4		-1.03437	0.0467427
ENSG00000102181	CD99L2	CD99 molecule-like 2	-2.79296	0
ENSG00000267432	RP11-559N14.5		-1.80118	1.1939e-13
ENSG00000196132	MYT1	myelin transcription factor 1	-2.34689	1.57952e-14
ENSG00000214646	RP11-114H24.4		-2.3486	7.99817e-13
ENSG00000261628	RP11-540B6.3		-1.51119	2.17772e-08
ENSG00000214253	FIS1	fission 1 (mitochondrial outer membrane) homolog (S. cerevisiae)	-1.09554	2.09884e-115
ENSG00000128253	RFPL2	ret finger protein-like 2	-2.10288	6.78814e-15
ENSG00000125434	SLC25A35	solute carrier family 25, member 35	-2.22411	3.62952e-106
ENSG00000147601	TERF1	telomeric repeat binding factor (NIMA-interacting) 1	-1.12309	1.39192e-65
ENSG00000169692	AGPAT2	1-acylglycerol-3-phosphate O-acyltransferase 2 (lysophosphatidic acid acyltransferase, beta)	-2.09262	1.2527e-265
ENSG00000254774	RP11-148O21.3		-1.03333	1.26402e-05
ENSG00000090686	USP48	ubiquitin specific peptidase 48	-1.33918	7.97571e-260
ENSG00000169621	APLF	aprataxin and PNKP like factor	-1.35466	3.0718e-10
ENSG00000267420	RP11-527L4.6		-2.01045	9.4063e-09
ENSG00000162729	IGSF8	immunoglobulin superfamily, member 8	-2.7983	0
ENSG00000131374	TBC1D5	TBC1 domain family, member 5	-1.14049	2.73495e-37
ENSG00000231050	RP1-140A9.1		-1.48179	3.63407e-08
ENSG00000052126	PLEKHA5	pleckstrin homology domain containing, family A member 5	-1.94147	0
ENSG00000125388	GRK4	G protein-coupled receptor kinase 4	-1.23789	9.27296e-59
ENSG00000262050	RP11-74E22.3		-1.3023	7.23364e-06
ENSG00000198121	LPAR1	lysophosphatidic acid receptor 1	-3.23066	2.46417e-17
ENSG00000223356	RP11-66D17.5		-1.49997	9.97505e-10
ENSG00000197180	BX936347.1		-1.29846	5.00303e-18
ENSG00000065717	TLE2	transducin-like enhancer of split 2 (E(sp1) homolog, Drosophila)	-3.30048	1.72289e-68
ENSG00000198755	RPL10A	ribosomal protein L10a	-1.54084	9.55304e-133
ENSG00000124615	MOCS1	molybdenum cofactor synthesis 1	-2.53063	0
ENSG00000127481	UBR4	ubiquitin protein ligase E3 component n-recognin 4	-1.1495	1.73414e-72
ENSG00000167969	ECI1	enoyl-CoA delta isomerase 1	-1.19448	4.93192e-51
ENSG00000160695	VPS11	vacuolar protein sorting 11 homolog (S. cerevisiae)	-1.15697	2.24494e-111
ENSG00000224330	AC005019.3		-2.03008	1.49466e-11
ENSG00000165672	PRDX3	peroxiredoxin 3	-1.20475	2.6465e-122
ENSG00000130201	EXOC3L2	exocyst complex component 3-like 2	-2.71344	8.41072e-19
ENSG00000185522	C11orf35	chromosome 11 open reading frame 35	-1.72558	1.42871e-61
ENSG00000110871	COQ5	coenzyme Q5 homolog, methyltransferase (S. cerevisiae)	-1.75707	0
ENSG00000223829	AC004870.4		-1.65626	1.82683e-09
ENSG00000160219	GAB3	GRB2-associated binding protein 3	-1.73048	1.67732e-10
ENSG00000232973	CYP1B1-AS1	CYP1B1 antisense RNA 1	-1.29754	8.58275e-07
ENSG00000130270	ATP8B3	ATPase, aminophospholipid transporter, class I, type 8B, member 3	-2.02131	3.88934e-26
ENSG00000100342	APOL1	apolipoprotein L, 1	-1.25541	7.53493e-08
ENSG00000224596	RP11-202P11.1		-1.75971	3.29057e-25
ENSG00000111642	CHD4	chromodomain helicase DNA binding protein 4	-1.51343	0
ENSG00000116661	FBXO2	F-box protein 2	-1.18629	6.30902e-13
ENSG00000083799	CYLD	cylindromatosis (turban tumor syndrome)	-1.41102	7.82197e-123
ENSG00000177181	RIMKLA	ribosomal modification protein rimK-like family member A	-1.69188	6.8108e-08
ENSG00000198836	OPA1	optic atrophy 1 (autosomal dominant)	-1.38173	1.30864e-114
ENSG00000144619	CNTN4	contactin 4	-1.16394	6.04318e-05
ENSG00000099998	GGT5	gamma-glutamyltransferase 5	-4.46829	8.41887e-20
ENSG00000184925	LCN12	lipocalin 12	-2.21455	5.13835e-17
ENSG00000006607	FARP2	FERM, RhoGEF and pleckstrin domain protein 2	-1.67308	1.66685e-70
ENSG00000165512	ZNF22	zinc finger protein 22	-1.80731	0.0159963
ENSG00000206561	COLQ	collagen-like tail subunit (single strand of homotrimer) of asymmetric acetylcholinesterase	-1.3778	2.55637e-25
ENSG00000151725	MLF1IP	MLF1 interacting protein	-1.637	5.6117e-98
ENSG00000163884	KLF15	Kruppel-like factor 15	-1.65761	5.64212e-73
ENSG00000177602	GSG2	germ cell associated 2 (haspin)	-1.24224	5.55356e-27
ENSG00000250596	RP11-440I14.2		-1.31576	3.10509e-07
ENSG00000253161	RP11-150O12.1		-1.43391	5.10961e-09
ENSG00000139192	TAPBPL	TAP binding protein-like	-1.03702	6.95671e-08
ENSG00000187416	LHFPL3	lipoma HMGIC fusion partner-like 3	-3.12562	4.3315e-52
ENSG00000196535	MYO18A	myosin XVIIIA	-1.16518	4.04518e-111
ENSG00000235821	IFITM4P	interferon induced transmembrane protein 4 pseudogene	-1.67308	3.97033e-11
ENSG00000089685	BIRC5	baculoviral IAP repeat containing 5	-1.34335	4.90653e-48
ENSG00000108654	DDX5	DEAD (Asp-Glu-Ala-Asp) box helicase 5	-1.23389	0
ENSG00000186583	SPATC1	spermatogenesis and centriole associated 1	-1.40756	4.29579e-07
ENSG00000164403	SHROOM1	shroom family member 1	-1.02396	2.41105e-12
ENSG00000207631	MIR641	microRNA 641	-2.09128	4.65263e-13
ENSG00000255367	RP13-726E6.2		-2.20941	4.19009e-27
ENSG00000082805	ERC1	ELKS/RAB6-interacting/CAST family member 1	-1.17049	5.53727e-34
ENSG00000152642	GPD1L	glycerol-3-phosphate dehydrogenase 1-like	-1.65184	6.68732e-42
ENSG00000152270	PDE3B	phosphodiesterase 3B, cGMP-inhibited	-2.08179	3.81176e-74
ENSG00000090534	THPO	thrombopoietin	-1.73183	9.83634e-10
ENSG00000226416	MRPL23-AS1	MRPL23 antisense RNA 1	-3.40463	1.79391e-20
ENSG00000229828	RP11-94I2.1		-2.22523	2.2571e-08
ENSG00000182612	TSPAN10	tetraspanin 10	-3.25897	0
ENSG00000159761	C16orf86	chromosome 16 open reading frame 86	-1.8166	5.41584e-53
ENSG00000008382	MPND	MPN domain containing	-1.1076	1.98492e-16
ENSG00000134955	SLC37A2	solute carrier family 37 (glycerol-3-phosphate transporter), member 2	-1.90612	7.7128e-98
ENSG00000008513	ST3GAL1	ST3 beta-galactoside alpha-2,3-sialyltransferase 1	-2.34968	7.18732e-250
ENSG00000173281	PPP1R3B	protein phosphatase 1, regulatory subunit 3B	-1.55094	1.07965e-115
ENSG00000263004	RP11-166P13.3		-1.34823	9.65632e-15
[truncated: 2,090 more rows]

## Sheet: 501M_shBRG1_Up-List
Ensembl gene id	Gene name	Description	Average log2 change (shBRG1/shControl)	Adjusted p-value
ENSG00000006756	ARSD	arylsulfatase D	1.21924	4.13447e-09
ENSG00000063978	RNF4	ring finger protein 4	1.29553	0
ENSG00000071967	CYBRD1	cytochrome b reductase 1	1.10919	1.18141e-45
ENSG00000072110	ACTN1	actinin, alpha 1	2.14726	0
ENSG00000092068	SLC7A8	solute carrier family 7 (amino acid transporter light chain, L system), member 8	1.24814	1.04826e-169
ENSG00000104725	NEFL	neurofilament, light polypeptide	2.02354	1.4647e-54
ENSG00000106665	CLIP2	CAP-GLY domain containing linker protein 2	1.14203	8.27208e-87
ENSG00000107130	NCS1	neuronal calcium sensor 1	1.03009	1.17501e-67
ENSG00000107521	HPS1	Hermansky-Pudlak syndrome 1	1.20917	1.22458e-98
ENSG00000107984	DKK1	dickkopf 1 homolog (Xenopus laevis)	5.18684	2.03124e-245
ENSG00000110492	MDK	midkine (neurite growth-promoting factor 2)	2.16345	1.13737e-50
ENSG00000114019	AMOTL2	angiomotin like 2	2.98079	1.14631e-270
ENSG00000115129	TP53I3	tumor protein p53 inducible protein 3	1.59851	1.11201e-18
ENSG00000115295	CLIP4	CAP-GLY domain containing linker protein family, member 4	1.00221	5.69572e-08
ENSG00000115310	RTN4	reticulon 4	1.09138	3.54704e-210
ENSG00000115738	ID2	inhibitor of DNA binding 2, dominant negative helix-loop-helix protein	3.22162	0
ENSG00000115963	RND3	Rho family GTPase 3	3.31274	0
ENSG00000116096	SPR	sepiapterin reductase (7,8-dihydrobiopterin:NADP+ oxidoreductase)	2.14052	5.48408e-209
ENSG00000116977	LGALS8	lectin, galactoside-binding, soluble, 8	2.90049	2.84662e-180
ENSG00000118680	MYL12B	myosin, light chain 12B, regulatory	1.1358	1.20743e-187
ENSG00000119899	SLC17A5	solute carrier family 17 (anion/sugar transporter), member 5	1.25791	1.18955e-238
ENSG00000126803	HSPA2	heat shock 70kDa protein 2	1.50257	8.42856e-54
ENSG00000135046	ANXA1	annexin A1	6.86737	0
ENSG00000144824	PHLDB2	pleckstrin homology-like domain, family B, member 2	1.00957	3.31971e-160
ENSG00000149257	SERPINH1	serpin peptidase inhibitor, clade H (heat shock protein 47), member 1, (collagen binding protein 1)	1.31335	6.90781e-77
ENSG00000150938	CRIM1	cysteine rich transmembrane BMP regulator 1 (chordin-like)	3.75685	8.13331e-127
ENSG00000154734	ADAMTS1	ADAM metallopeptidase with thrombospondin type 1 motif, 1	1.21512	5.14242e-45
ENSG00000159216	RUNX1	runt-related transcription factor 1	2.2836	1.96509e-154
ENSG00000162734	PEA15	phosphoprotein enriched in astrocytes 15	1.09633	2.54659e-124
ENSG00000163191	S100A11	S100 calcium binding protein A11	2.2641	0
ENSG00000165025	SYK	spleen tyrosine kinase	1.38441	3.84033e-75
ENSG00000169136	ATF5	activating transcription factor 5	1.33287	4.30895e-56
ENSG00000169247	SH3TC2	SH3 domain and tetratricopeptide repeats 2	1.6602	3.13489e-66
ENSG00000170017	ALCAM	activated leukocyte cell adhesion molecule	1.43655	4.89807e-30
ENSG00000175592	FOSL1	FOS-like antigen 1	2.21162	2.66568e-47
ENSG00000176749	CDK5R1	cyclin-dependent kinase 5, regulatory subunit 1 (p35)	1.56657	9.13947e-213
ENSG00000179820	MYADM	myeloid-associated differentiation marker	2.56495	3.73386e-226
ENSG00000184351	KRTAP19-1	keratin associated protein 19-1	1.50126	3.65335e-66
ENSG00000187498	COL4A1	collagen, type IV, alpha 1	1.20286	0.00599036
ENSG00000198960	ARMCX6	armadillo repeat containing, X-linked 6	1.00128	7.53115e-90
ENSG00000204262	COL5A2	collagen, type V, alpha 2	2.29656	4.98574e-32
ENSG00000204580	DDR1	discoidin domain receptor tyrosine kinase 1	3.02272	3.29222e-92
ENSG00000254986	DPP3	dipeptidyl-peptidase 3	1.1964	3.28201e-93
ENSG00000136111	TBC1D4	TBC1 domain family, member 4	1.04936	1.6432e-49
ENSG00000253159	PCDHGA12	protocadherin gamma subfamily A, 12	2.71245	1.97211e-36
ENSG00000235162	C12orf75	chromosome 12 open reading frame 75	1.38504	3.78098e-12
ENSG00000136153	LMO7	LIM domain 7	1.85531	5.61965e-23
ENSG00000166073	GPR176	G protein-coupled receptor 176	1.6047	3.56067e-82
ENSG00000116717	GADD45A	growth arrest and DNA-damage-inducible, alpha	2.27746	0
ENSG00000150687	PRSS23	protease, serine, 23	3.34685	1.24323e-118
ENSG00000138675	FGF5	fibroblast growth factor 5	1.16865	1.50114e-05
ENSG00000060718	COL11A1	collagen, type XI, alpha 1	1.56441	0.000742965
ENSG00000105270	CLIP3	CAP-GLY domain containing linker protein 3	1.53238	2.93969e-07
ENSG00000163637	PRICKLE2	prickle homolog 2 (Drosophila)	1.14587	4.71844e-12
ENSG00000141934	PPAP2C	phosphatidic acid phosphatase type 2C	1.16984	4.08447e-20
ENSG00000105647	PIK3R2	phosphoinositide-3-kinase, regulatory subunit 2 (beta)	1.91445	0
ENSG00000124225	PMEPA1	prostate transmembrane protein, androgen induced 1	3.00046	5.08479e-36
ENSG00000172661	FAM21C	family with sequence similarity 21, member C	2.05547	4.25056e-41
ENSG00000146067	FAM193B	family with sequence similarity 193, member B	2.00836	1.00827e-17
ENSG00000133687	TMTC1	transmembrane and tetratricopeptide repeat containing 1	1.8096	4.50548e-11
ENSG00000134330	IAH1	isoamyl acetate-hydrolyzing esterase 1 homolog (S. cerevisiae)	2.39841	4.51004e-43
ENSG00000173705	SUSD5	sushi domain containing 5	1.5338	1.10599e-05
ENSG00000163110	PDLIM5	PDZ and LIM domain 5	1.31375	3.73906e-198
ENSG00000159899	NPR2	natriuretic peptide receptor B/guanylate cyclase B (atrionatriuretic peptide receptor B)	2.06111	3.22655e-14
ENSG00000120833	SOCS2	suppressor of cytokine signaling 2	2.16514	2.19659e-94
ENSG00000158109	TPRG1L	tumor protein p63 regulated 1-like	1.83559	0
ENSG00000125962	ARMCX5	armadillo repeat containing, X-linked 5	2.06712	8.74773e-21
ENSG00000107796	ACTA2	actin, alpha 2, smooth muscle, aorta	1.70417	1.41136e-13
ENSG00000105281	SLC1A5	solute carrier family 1 (neutral amino acid transporter), member 5	1.16735	6.7804e-58
ENSG00000100243	CYB5R3	cytochrome b5 reductase 3	1.66601	4.23508e-171
ENSG00000034152	MAP2K3	mitogen-activated protein kinase kinase 3	2.15126	1.4968e-132
ENSG00000133083	DCLK1	doublecortin-like kinase 1	4.04963	1.24918e-235
ENSG00000163297	ANTXR2	anthrax toxin receptor 2	1.6411	4.29557e-20
ENSG00000114405	C3orf14	chromosome 3 open reading frame 14	1.891	1.21425e-109
ENSG00000165406	MARCH8	membrane-associated ring finger (C3HC4) 8, E3 ubiquitin protein ligase	4.82295	1.18882e-172
ENSG00000006327	TNFRSF12A	tumor necrosis factor receptor superfamily, member 12A	3.60027	0
ENSG00000198431	TXNRD1	thioredoxin reductase 1	1.03231	3.79722e-57
ENSG00000116117	PARD3B	par-3 partitioning defective 3 homolog B (C. elegans)	1.26982	1.15519e-31
ENSG00000074590	NUAK1	NUAK family, SNF1-like kinase, 1	2.65049	1.71126e-85
ENSG00000173917	HOXB2	homeobox B2	1.83363	1.04398e-46
ENSG00000196878	LAMB3	laminin, beta 3	1.59072	1.99858e-35
ENSG00000159200	RCAN1	regulator of calcineurin 1	1.06414	1.27492e-119
ENSG00000119383	PPP2R4	protein phosphatase 2A activator, regulatory subunit 4	1.21677	2.15815e-269
ENSG00000255737	RP11-571M6.6	HCG2014417, isoform CRA_a; Uncharacterized protein; cDNA FLJ59598	1.51557	2.82861e-17
ENSG00000120694	HSPH1	heat shock 105kDa/110kDa protein 1	1.05611	0
ENSG00000100196	KDELR3	KDEL (Lys-Asp-Glu-Leu) endoplasmic reticulum protein retention receptor 3	1.84737	1.9149e-94
ENSG00000182986	ZNF320	zinc finger protein 320	1.65655	3.13171e-98
ENSG00000204516	MICB	MHC class I polypeptide-related sequence B	1.09668	2.00782e-06
ENSG00000140564	FURIN	furin (paired basic amino acid cleaving enzyme)	2.24256	0
ENSG00000120087	HOXB7	homeobox B7	1.68651	7.5838e-36
ENSG00000078902	TOLLIP	toll interacting protein	1.07207	3.89335e-79
ENSG00000214022	REPIN1	replication initiator 1	1.58484	3.06197e-122
ENSG00000151327	FAM177A1	family with sequence similarity 177, member A1	1.17819	8.76516e-85
ENSG00000240184	PCDHGC3	protocadherin gamma subfamily C, 3	1.27305	0.0432808
ENSG00000023572	GLRX2	glutaredoxin 2	1.0394	2.27371e-45
ENSG00000102409	BEX4	brain expressed, X-linked 4	1.88743	4.92024e-06
ENSG00000159840	ZYX	zyxin	3.51066	4.64752e-267
ENSG00000140807	NKD1	naked cuticle homolog 1 (Drosophila)	1.71738	2.69109e-170
ENSG00000006007	GDE1	glycerophosphodiester phosphodiesterase 1	1.1465	2.7076e-98
ENSG00000197747	S100A10	S100 calcium binding protein A10	1.62859	1.10039e-68
ENSG00000166741	NNMT	nicotinamide N-methyltransferase	2.71413	8.87931e-24
ENSG00000253873	PCDHGA11	protocadherin gamma subfamily A, 11	1.13393	4.11136e-05
ENSG00000168994	PXDC1	PX domain containing 1	2.41407	1.42504e-110
ENSG00000105568	PPP2R1A	protein phosphatase 2, regulatory subunit A, alpha	1.39465	2.02856e-230
ENSG00000105063	PPP6R1	protein phosphatase 6, regulatory subunit 1	1.42116	0
ENSG00000150551	LYPD1	LY6/PLAUR domain containing 1	2.73609	1.14313e-06
ENSG00000136158	SPRY2	sprouty homolog 2 (Drosophila)	1.28191	4.09019e-135
ENSG00000140465	CYP1A1	cytochrome P450, family 1, subfamily A, polypeptide 1	1.70301	1.65522e-64
ENSG00000100292	HMOX1	heme oxygenase (decycling) 1	2.0362	7.97404e-80
ENSG00000126947	ARMCX1	armadillo repeat containing, X-linked 1	3.92804	1.2592e-25
ENSG00000132530	XAF1	XIAP associated factor 1	1.11281	0.00500563
ENSG00000147676	MAL2	mal, T-cell differentiation protein 2 (gene/pseudogene)	3.49699	2.14848e-39
ENSG00000163739	CXCL1	chemokine (C-X-C motif) ligand 1 (melanoma growth stimulating activity, alpha)	3.94702	8.25803e-14
ENSG00000179152	TCAIM	T cell activation inhibitor, mitochondrial	1.29626	1.2971e-74
ENSG00000204387	C6orf48	chromosome 6 open reading frame 48	1.34385	4.82861e-246
ENSG00000107438	PDLIM1	PDZ and LIM domain 1	1.9203	5.99968e-219
ENSG00000112294	ALDH5A1	aldehyde dehydrogenase 5 family, member A1	1.24174	0.000302511
ENSG00000131080	EDA2R	ectodysplasin A2 receptor	2.29404	1.45246e-10
ENSG00000137834	SMAD6	SMAD family member 6	1.16491	1.52724e-32
ENSG00000124496	TRERF1	transcriptional regulating factor 1	1.15806	1.01656e-06
ENSG00000104695	PPP2CB	protein phosphatase 2, catalytic subunit, beta isozyme	1.16613	0
ENSG00000115107	STEAP3	STEAP family member 3, metalloreductase	1.23592	5.71471e-09
ENSG00000131408	NR1H2	nuclear receptor subfamily 1, group H, member 2	2.10936	9.45363e-137
ENSG00000145623	OSMR	oncostatin M receptor	1.18119	0.000400256
ENSG00000160877	NACC1	nucleus accumbens associated 1, BEN and BTB (POZ) domain containing	1.2097	3.6861e-153
ENSG00000169439	SDC2	syndecan 2	1.33017	2.12816e-21
ENSG00000123643	SLC36A1	solute carrier family 36 (proton/amino acid symporter), member 1	1.92041	0
ENSG00000170873	MTSS1	metastasis suppressor 1	1.04275	1.77673e-18
ENSG00000008394	MGST1	microsomal glutathione S-transferase 1	1.32114	0.00887512
ENSG00000171766	GATM	glycine amidinotransferase (L-arginine:glycine amidinotransferase)	1.08705	1.32429e-11
ENSG00000131668	BARX1	BARX homeobox 1	1.93007	1.56078e-09
ENSG00000130881	LRP3	low density lipoprotein receptor-related protein 3	1.40202	1.16557e-23
ENSG00000111224	PARP11	poly (ADP-ribose) polymerase family, member 11	1.68298	1.70398e-19
ENSG00000081985	IL12RB2	interleukin 12 receptor, beta 2	1.91951	9.74152e-10
ENSG00000110400	PVRL1	poliovirus receptor-related 1 (herpesvirus entry mediator C)	1.1754	6.29228e-09
ENSG00000242516	RP11-413E6.8		1.81617	5.86756e-15
ENSG00000107021	TBC1D13	TBC1 domain family, member 13	1.34655	2.1815e-234
ENSG00000133138	TBC1D8B	TBC1 domain family, member 8B (with GRAM domain)	1.07917	2.37027e-29
ENSG00000083720	OXCT1	3-oxoacid CoA transferase 1	1.51419	0.0183298
ENSG00000149357	LAMTOR1	late endosomal/lysosomal adaptor, MAPK and MTOR activator 1	1.40269	5.32551e-62
ENSG00000112419	PHACTR2	phosphatase and actin regulator 2	1.47308	1.30142e-05
ENSG00000106538	RARRES2	retinoic acid receptor responder (tazarotene induced) 2	1.37462	7.71773e-11
ENSG00000113645	WWC1	WW and C2 domain containing 1	1.3143	2.14236e-283
ENSG00000166582	CENPV	centromere protein V	1.28627	1.54823e-16
ENSG00000139579	NABP2	nucleic acid binding protein 2	1.13025	3.89893e-88
ENSG00000105499	PLA2G4C	phospholipase A2, group IVC (cytosolic, calcium-independent)	2.22601	3.58956e-84
ENSG00000166401	SERPINB8	serpin peptidase inhibitor, clade B (ovalbumin), member 8	1.91131	4.88298e-99
ENSG00000144366	GULP1	GULP, engulfment adaptor PTB domain containing 1	1.11918	0.00687547
ENSG00000178913	TAF7	TAF7 RNA polymerase II, TATA box binding protein (TBP)-associated factor, 55kDa	1.39766	4.05555e-203
ENSG00000088256	GNA11	guanine nucleotide binding protein (G protein), alpha 11 (Gq class)	1.24395	3.12067e-221
ENSG00000182165	TP53TG1	TP53 target 1 (non-protein coding)	1.34576	4.89475e-18
ENSG00000109917	ZNF259	zinc finger protein 259	1.91971	0
ENSG00000205485	AC004980.7		1.31274	7.85142e-37
ENSG00000117318	ID3	inhibitor of DNA binding 3, dominant negative helix-loop-helix protein	3.53319	0
ENSG00000003096	KLHL13	kelch-like 13 (Drosophila)	1.46473	2.12334e-05
ENSG00000179455	MKRN3	makorin ring finger protein 3	1.77159	1.7646e-239
ENSG00000242086	AC069513.3		1.00612	1.60457e-65
ENSG00000156299	TIAM1	T-cell lymphoma invasion and metastasis 1	1.21135	7.6037e-05
ENSG00000064666	CNN2	calponin 2	1.3756	1.89692e-281
ENSG00000182253	SYNM	synemin, intermediate filament protein	2.18154	1.21759e-08
ENSG00000155265	GOLGA7B	golgin A7 family, member B	1.93317	1.22395e-80
ENSG00000137193	PIM1	pim-1 oncogene	1.79266	4.57656e-111
ENSG00000135636	DYSF	dysferlin, limb girdle muscular dystrophy 2B (autosomal recessive)	1.24269	2.9465e-21
ENSG00000234912	LINC00338	long intergenic non-protein coding RNA 338	2.24581	0
ENSG00000108375	RNF43	ring finger protein 43	2.38318	0
ENSG00000182195	LDOC1	leucine zipper, down-regulated in cancer 1	2.48251	1.46129e-89
ENSG00000182749	PAQR7	progestin and adipoQ receptor family member VII	2.43208	5.62335e-52
ENSG00000187994	RINL	Ras and Rab interactor-like	1.51366	1.75171e-07
ENSG00000197019	SERTAD1	SERTA domain containing 1	1.5077	7.47661e-49
ENSG00000145246	ATP10D	ATPase, class V, type 10D	1.02246	4.4642e-39
ENSG00000165410	CFL2	cofilin 2 (muscle)	1.28557	8.15363e-112
ENSG00000198131	ZNF544	zinc finger protein 544	1.06026	1.64365e-70
ENSG00000234456	MAGI2-AS3	MAGI2 antisense RNA 3	1.2496	0.0341383
ENSG00000158480	SPATA2	spermatogenesis associated 2	1.3784	1.32501e-96
ENSG00000251339	RP11-506N2.1		1.75108	1.08427e-11
ENSG00000107862	GBF1	golgi brefeldin A resistant guanine nucleotide exchange factor 1	1.36626	1.35483e-274
ENSG00000105700	KXD1	KxDL motif containing 1	1.01328	5.6434e-79
ENSG00000168374	ARF4	ADP-ribosylation factor 4	1.82662	0
ENSG00000104899	AMH	anti-Mullerian hormone	2.42649	3.82653e-133
ENSG00000198908	BHLHB9	basic helix-loop-helix domain containing, class B, 9	2.08338	5.88344e-11
ENSG00000109063	MYH3	myosin, heavy chain 3, skeletal muscle, embryonic	1.2611	8.87883e-90
ENSG00000174943	KCTD13	potassium channel tetramerisation domain containing 13	1.26188	5.09717e-201
ENSG00000103111	MON1B	MON1 homolog B (yeast)	1.20086	5.96709e-216
ENSG00000175556	LONRF3	LON peptidase N-terminal domain and ring finger 3	2.08948	3.52009e-05
ENSG00000127329	PTPRB	protein tyrosine phosphatase, receptor type, B	2.15136	2.49365e-57
ENSG00000090530	LEPREL1	leprecan-like 1	1.4733	8.26508e-21
ENSG00000144583	MARCH4	membrane-associated ring finger (C3HC4) 4, E3 ubiquitin protein ligase	3.69472	4.36513e-32
ENSG00000172123	SLFN12	schlafen family member 12	3.87798	4.15987e-21
ENSG00000138411	HECW2	HECT, C2 and WW domain containing E3 ubiquitin protein ligase 2	2.31693	4.7243e-22
ENSG00000173598	NUDT4	nudix (nucleoside diphosphate linked moiety X)-type motif 4	1.68159	1.73758e-90
ENSG00000203326	ZNF525	zinc finger protein 525	1.59807	2.65887e-59
ENSG00000169429	IL8	interleukin 8	1.78639	8.32388e-51
ENSG00000181982	CCDC149	coiled-coil domain containing 149	1.80854	0.000459143
ENSG00000167306	MYO5B	myosin VB	2.37529	1.53914e-13
ENSG00000186111	PIP5K1C	phosphatidylinositol-4-phosphate 5-kinase, type I, gamma	1.13864	3.61859e-48
ENSG00000165802	NELF	nasal embryonic LHRH factor	2.00195	0
ENSG00000118960	HS1BP3	HCLS1 binding protein 3	1.70881	3.95785e-131
ENSG00000178695	KCTD12	potassium channel tetramerisation domain containing 12	1.5274	4.80836e-18
ENSG00000146592	CREB5	cAMP responsive element binding protein 5	1.7776	0
ENSG00000166228	PCBD1	pterin-4 alpha-carbinolamine dehydratase/dimerization cofactor of hepatocyte nuclear factor 1 alpha	1.28029	5.44361e-56
ENSG00000253276	CCDC71L	coiled-coil domain containing 71-like	1.13842	1.24653e-32
ENSG00000213965	NUDT19	nudix (nucleoside diphosphate linked moiety X)-type motif 19	1.73747	4.07691e-57
ENSG00000105520	LPPR2	Lipid phosphate phosphatase-related protein type 2	1.41811	8.08863e-93
ENSG00000120686	UFM1	ubiquitin-fold modifier 1	1.96414	0
ENSG00000185112	FAM43A	family with sequence similarity 43, member A	2.42352	5.63202e-05
ENSG00000151892	GFRA1	GDNF family receptor alpha 1	2.49503	4.82387e-12
ENSG00000197905	TEAD4	TEA domain family member 4	1.05022	1.50883e-43
ENSG00000169851	PCDH7	protocadherin 7	3.11388	1.03829e-27
ENSG00000150990	DHX37	DEAH (Asp-Glu-Ala-His) box polypeptide 37	1.25463	5.11728e-112
ENSG00000250337	RP11-46C20.1		2.25547	6.21139e-14
ENSG00000109320	NFKB1	nuclear factor of kappa light polypeptide gene enhancer in B-cells 1	1.15403	4.6431e-158
ENSG00000189190	ZNF600	zinc finger protein 600	2.14885	6.78947e-50
ENSG00000183439	TRIM61	tripartite motif containing 61	1.42242	1.68138e-06
ENSG00000116128	BCL9	B-cell CLL/lymphoma 9	1.43439	6.29703e-99
ENSG00000158301	GPRASP2	G protein-coupled receptor associated sorting protein 2	2.09867	2.78392e-06
ENSG00000234072	AC074117.10		1.13793	6.9731e-107
ENSG00000223960	AC009948.5		1.95039	2.64152e-35
ENSG00000139233	LLPH	LLP homolog, long-term synaptic facilitation (Aplysia)	1.01957	3.91203e-93
ENSG00000182511	FES	feline sarcoma oncogene	3.25296	1.6309e-53
ENSG00000176641	RNF152	ring finger protein 152	1.45877	6.41271e-38
ENSG00000020577	SAMD4A	sterile alpha motif domain containing 4A	1.44889	2.73275e-157
ENSG00000158079	PTPDC1	protein tyrosine phosphatase domain containing 1	1.03753	2.77808e-60
ENSG00000246705	H2AFJ	H2A histone family, member J	1.65746	0.0396342
ENSG00000225648	SBDSP1	Shwachman-Bodian-Diamond syndrome pseudogene 1	1.52571	6.68656e-202
ENSG00000167383	ZNF229	zinc finger protein 229	1.25986	2.63945e-153
ENSG00000044446	PHKA2	phosphorylase kinase, alpha 2 (liver)	1.86799	0
ENSG00000213523	SRA1	steroid receptor RNA activator 1	1.12639	7.4556e-70
ENSG00000090615	GOLGA3	golgin A3	1.1013	0
ENSG00000224287	MSL3P1	male-specific lethal 3 homolog (Drosophila) pseudogene 1	1.18893	2.45609e-107
ENSG00000076067	RBMS2	RNA binding motif, single stranded interacting protein 2	1.86136	2.52039e-153
ENSG00000167555	ZNF528	zinc finger protein 528	1.7996	1.0877e-182
ENSG00000198879	SFMBT2	Scm-like with four mbt domains 2	1.54274	0.000162823
ENSG00000108511	HOXB6	homeobox B6	2.23228	1.12012e-42
ENSG00000163347	CLDN1	claudin 1	5.40956	5.03638e-24
ENSG00000080845	DLGAP4	discs, large (Drosophila) homolog-associated protein 4	1.00045	8.07865e-63
ENSG00000155090	KLF10	Kruppel-like factor 10	2.49737	1.15302e-204
ENSG00000251381	CTC-497E21.4		1.14185	1.43512e-125
ENSG00000144481	TRPM8	transient receptor potential cation channel, subfamily M, member 8	1.79605	1.42076e-12
ENSG00000171067	C11orf24	chromosome 11 open reading frame 24	1.61551	1.55318e-277
ENSG00000163364	AC017048.3		1.33521	4.09822e-24
ENSG00000164933	SLC25A32	solute carrier family 25 (mitochondrial folate carrier) , member 32	1.04735	5.3458e-91
ENSG00000144369	FAM171B	family with sequence similarity 171, member B	1.58754	1.20311e-288
ENSG00000108176	DNAJC12	DnaJ (Hsp40) homolog, subfamily C, member 12	1.68201	3.30966e-58
ENSG00000261364	RP11-59E19.4		1.15312	2.6148e-43
ENSG00000151468	CCDC3	coiled-coil domain containing 3	2.59193	1.43333e-05
ENSG00000117228	GBP1	guanylate binding protein 1, interferon-inducible	3.35714	5.79821e-72
ENSG00000204673	AKT1S1	AKT1 substrate 1 (proline-rich)	2.46196	0
ENSG00000182319	PRAGMIN	Tyrosine-protein kinase SgK223	2.82488	0
ENSG00000130522	JUND	jun D proto-oncogene	2.05274	0
ENSG00000125971	DYNLRB1	dynein, light chain, roadblock-type 1	2.88226	0
ENSG00000119487	MAPKAP1	mitogen-activated protein kinase associated protein 1	1.09413	2.01369e-60
ENSG00000173114	LRRN3	leucine rich repeat neuronal 3	1.55577	6.59772e-109
ENSG00000164442	CITED2	Cbp/p300-interacting transactivator, with Glu/Asp-rich carboxy-terminal domain, 2	1.85623	6.3235e-132
ENSG00000109079	TNFAIP1	tumor necrosis factor, alpha-induced protein 1 (endothelial)	1.45338	0
ENSG00000248663	CTC-504A5.1		2.44416	0.000117558
ENSG00000261188	CTA-445C9.14		1.64726	1.45071e-166
ENSG00000168685	IL7R	interleukin 7 receptor	1.47088	4.67076e-06
ENSG00000106477	CEP41	centrosomal protein 41kDa	1.02852	1.83759e-63
ENSG00000113749	HRH2	histamine receptor H2	2.63297	3.31505e-06
ENSG00000145817	YIPF5	Yip1 domain family, member 5	1.38686	0
ENSG00000121236	TRIM6	tripartite motif containing 6	2.37952	2.10748e-14
ENSG00000116649	SRM	spermidine synthase	1.60981	1.01455e-75
ENSG00000163794	UCN	urocortin	1.04774	1.4255e-29
ENSG00000176697	BDNF	brain-derived neurotrophic factor	2.26686	8.4747e-07
ENSG00000085276	MECOM	MDS1 and EVI1 complex locus	1.83533	3.43658e-46
ENSG00000255433	AP000479.1		2.07762	0.00812544
ENSG00000233218	SNX18P16	sorting nexin 18 pseudogene 16	1.08643	1.42791e-10
ENSG00000143333	RGS16	regulator of G-protein signaling 16	2.27515	3.4673e-18
ENSG00000145934	ODZ2	odz, odd Oz/ten-m homolog 2 (Drosophila)	1.62219	1.57418e-08
ENSG00000171004	HS6ST2	heparan sulfate 6-O-sulfotransferase 2	3.22624	9.72394e-14
ENSG00000170558	CDH2	cadherin 2, type 1, N-cadherin (neuronal)	2.24231	2.96927e-05
ENSG00000136933	RABEPK	Rab9 effector protein with kelch motifs	1.78629	2.68666e-201
ENSG00000146648	EGFR	epidermal growth factor receptor	1.45936	0.000280242
ENSG00000144868	TMEM108	transmembrane protein 108	3.63356	2.30558e-20
ENSG00000099860	GADD45B	growth arrest and DNA-damage-inducible, beta	2.05208	3.96122e-91
ENSG00000128342	LIF	leukemia inhibitory factor	2.10063	8.93602e-26
ENSG00000198681	MAGEA1	melanoma antigen family A, 1 (directs expression of antigen MZ2-E)	1.11296	2.57487e-153
ENSG00000135363	LMO2	LIM domain only 2 (rhombotin-like 1)	2.29775	5.40232e-13
ENSG00000092607	TBX15	T-box 15	1.25611	0.02192
ENSG00000137959	IFI44L	interferon-induced protein 44-like	3.96644	7.69559e-09
ENSG00000175395	ZNF25	zinc finger protein 25	1.7776	1.55855e-56
ENSG00000152953	STK32B	serine/threonine kinase 32B	1.69296	0.0344265
ENSG00000184545	DUSP8	dual specificity phosphatase 8	3.33323	0
ENSG00000073605	GSDMB	gasdermin B	1.39746	1.77286e-77
ENSG00000106366	SERPINE1	serpin peptidase inhibitor, clade E (nexin, plasminogen activator inhibitor type 1), member 1	3.83531	1.99818e-161
ENSG00000133169	BEX1	brain expressed, X-linked 1	3.4943	1.40709e-08
ENSG00000183837	PNMA3	paraneoplastic Ma antigen 3	2.42271	5.16e-12
ENSG00000221990	C5orf55	chromosome 5 open reading frame 55	1.03172	4.7835e-130
ENSG00000182912	C21orf90	chromosome 21 open reading frame 90	1.08259	2.39861e-54
ENSG00000157514	TSC22D3	TSC22 domain family, member 3	1.44408	2.42271e-19
ENSG00000087074	PPP1R15A	protein phosphatase 1, regulatory subunit 15A	1.3074	6.89759e-61
ENSG00000166669	ATF7IP2	activating transcription factor 7 interacting protein 2	3.0011	3.29977e-08
ENSG00000178033	FAM26E	family with sequence similarity 26, member E	2.03084	1.32962e-05
ENSG00000101751	POLI	polymerase (DNA directed) iota	2.66193	0.000102869
ENSG00000196074	SYCP2	synaptonemal complex protein 2	1.83758	2.76159e-06
ENSG00000170989	S1PR1	sphingosine-1-phosphate receptor 1	4.41223	2.87905e-120
ENSG00000233621	RP11-422J8.1		1.83251	7.92584e-35
ENSG00000172965	AC068491.1		1.61139	3.06158e-139
ENSG00000153904	DDAH1	dimethylarginine dimethylaminohydrolase 1	2.51816	0
ENSG00000233593	RP4-665J23.1		1.47464	2.57044e-138
ENSG00000238121	LINC00426	long intergenic non-protein coding RNA 426	1.35497	2.23338e-69
ENSG00000177606	JUN	jun proto-oncogene	2.09349	2.65428e-87
ENSG00000145147	SLIT2	slit homolog 2 (Drosophila)	2.43849	6.65008e-42
ENSG00000132507	EIF5A	eukaryotic translation initiation factor 5A	1.04251	1.86163e-76
ENSG00000023608	SNAPC1	small nuclear RNA activating complex, polypeptide 1, 43kDa	1.30199	2.11931e-89
ENSG00000120314	WDR55	WD repeat domain 55	1.03831	1.07211e-217
ENSG00000146242	TPBG	trophoblast glycoprotein	1.8353	1.70048e-16
ENSG00000101460	MAP1LC3A	microtubule-associated protein 1 light chain 3 alpha	2.31676	1.30113e-05
ENSG00000166925	TSC22D4	TSC22 domain family, member 4	1.23599	8.81007e-59
ENSG00000125968	ID1	inhibitor of DNA binding 1, dominant negative helix-loop-helix protein	2.7381	1.54401e-205
ENSG00000146054	TRIM7	tripartite motif containing 7	1.37948	7.58287e-10
ENSG00000113070	HBEGF	heparin-binding EGF-like growth factor	1.4346	2.37124e-79
ENSG00000196159	FAT4	FAT tumor suppressor homolog 4 (Drosophila)	1.06244	1.06434e-23
ENSG00000117289	TXNIP	thioredoxin interacting protein	2.36316	3.40846e-44
ENSG00000242125	SNHG3	small nucleolar RNA host gene 3 (non-protein coding)	1.80528	5.3095e-222
ENSG00000131480	AOC2	amine oxidase, copper containing 2 (retina-specific)	2.60618	0
ENSG00000172465	TCEAL1	transcription elongation factor A (SII)-like 1	1.05651	1.45482e-27
ENSG00000090975	PITPNM2	phosphatidylinositol transfer protein, membrane-associated 2	1.32537	5.78338e-79
ENSG00000171860	C3AR1	complement component 3a receptor 1	2.61225	2.09512e-07
ENSG00000249119	MTND6P4	MT-ND6 pseudogene 4	1.04412	7.9393e-18
ENSG00000203805	PPAPDC1A	phosphatidic acid phosphatase type 2 domain containing 1A	4.89042	1.77875e-16
ENSG00000150961	SEC24D	SEC24 family, member D (S. cerevisiae)	1.03729	4.52335e-128
ENSG00000254184	TYW1B	tRNA-yW synthesizing protein 1 homolog B (S. cerevisiae)	1.06559	8.74793e-05
ENSG00000198538	ZNF28	zinc finger protein 28	1.97511	5.53733e-115
ENSG00000186472	PCLO	piccolo (presynaptic cytomatrix protein)	1.7846	7.77427e-152
ENSG00000106278	PTPRZ1	protein tyrosine phosphatase, receptor-type, Z polypeptide 1	1.02587	3.98912e-24
ENSG00000113083	LOX	lysyl oxidase	1.7938	3.19358e-14
ENSG00000175220	ARHGAP1	Rho GTPase activating protein 1	1.32843	2.16568e-169
ENSG00000170396	ZNF804A	zinc finger protein 804A	1.67942	2.46994e-11
ENSG00000196569	LAMA2	laminin, alpha 2	2.33645	6.98379e-16
ENSG00000137955	RABGGTB	Rab geranylgeranyltransferase, beta subunit	1.24306	0
ENSG00000142149	HUNK	hormonally up-regulated Neu-associated kinase	1.7102	3.45694e-09
ENSG00000145247	OCIAD2	OCIA domain containing 2	1.43635	0.0346949
ENSG00000160209	PDXK	pyridoxal (pyridoxine, vitamin B6) kinase	1.10383	2.38317e-205
ENSG00000171044	XKR6	XK, Kell blood group complex subunit-related family, member 6	2.53347	7.60196e-31
ENSG00000179431	FJX1	four jointed box 1 (Drosophila)	2.42094	1.47889e-207
ENSG00000198482	ZNF808	zinc finger protein 808	1.25822	1.52662e-23
ENSG00000177425	PAWR	PRKC, apoptosis, WT1, regulator	1.25432	7.44409e-40
ENSG00000088826	SMOX	spermine oxidase	1.01915	1.9899e-25
ENSG00000185920	PTCH1	patched 1	1.52697	2.07795e-68
ENSG00000105750	ZNF85	zinc finger protein 85	2.15156	5.87942e-21
ENSG00000013588	GPRC5A	G protein-coupled receptor, family C, group 5, member A	1.5925	1.96501e-10
ENSG00000231925	TAPBP	TAP binding protein (tapasin)	1.12348	1.83291e-186
ENSG00000198807	PAX9	paired box 9	1.12081	0.00680552
ENSG00000243444	PALM2	paralemmin 2	4.01813	2.73559e-48
ENSG00000132376	INPP5K	inositol polyphosphate-5-phosphatase K	1.40324	2.35097e-111
ENSG00000143195	ILDR2	immunoglobulin-like domain containing receptor 2	3.34093	2.33663e-14
ENSG00000021355	SERPINB1	serpin peptidase inhibitor, clade B (ovalbumin), member 1	1.20176	0.0097485
ENSG00000198246	SLC29A3	solute carrier family 29 (nucleoside transporters), member 3	1.09207	2.93385e-24
ENSG00000131653	TRAF7	TNF receptor-associated factor 7, E3 ubiquitin protein ligase	1.05537	5.74919e-69
ENSG00000156239	N6AMT1	N-6 adenine-specific DNA methyltransferase 1 (putative)	1.7898	2.64329e-110
ENSG00000187672	ERC2	ELKS/RAB6-interacting/CAST family member 2	3.61532	1.83846e-32
ENSG00000164099	PRSS12	protease, serine, 12 (neurotrypsin, motopsin)	2.67117	0.000214578
ENSG00000100906	NFKBIA	nuclear factor of kappa light polypeptide gene enhancer in B-cells inhibitor, alpha	1.96275	2.74195e-132
ENSG00000179598	PLD6	phospholipase D family, member 6	1.05718	3.06054e-34
ENSG00000138674	SEC31A	SEC31 homolog A (S. cerevisiae)	1.05132	1.70063e-99
ENSG00000111711	GOLT1B	golgi transport 1B	1.68882	3.39323e-159
ENSG00000124380	SNRNP27	small nuclear ribonucleoprotein 27kDa (U4/U6.U5)	1.41126	1.36977e-146
ENSG00000250067	YJEFN3	YjeF N-terminal domain containing 3	1.88732	4.12505e-146
ENSG00000175221	MED16	mediator complex subunit 16	1.06259	7.61581e-37
ENSG00000152076	CCDC74B	coiled-coil domain containing 74B	1.56441	6.40919e-10
ENSG00000172671	ZFAND4	zinc finger, AN1-type domain 4	2.96725	2.30353e-08
ENSG00000163132	MSX1	msh homeobox 1	2.06476	2.81184e-149
ENSG00000136603	SKIL	SKI-like oncogene	1.42171	2.45521e-68
ENSG00000162819	BROX	BRO1 domain and CAAX motif containing	1.23101	1.18939e-161
ENSG00000123728	RAP2C	RAP2C, member of RAS oncogene family	1.17825	5.23881e-66
ENSG00000203727	SAMD5	sterile alpha motif domain containing 5	2.93391	2.06806e-103
ENSG00000255135	RP11-111M22.3		1.92691	7.27068e-143
ENSG00000120549	KIAA1217	KIAA1217	1.51198	1.1947e-55
ENSG00000133106	EPSTI1	epithelial stromal interaction 1 (breast)	1.61862	0.0450131
ENSG00000179750	APOBEC3B	apolipoprotein B mRNA editing enzyme, catalytic polypeptide-like 3B	1.37203	1.97927e-58
ENSG00000176142	TMEM39A	transmembrane protein 39A	1.01551	6.72233e-136
ENSG00000104885	DOT1L	DOT1-like, histone H3 methyltransferase (S. cerevisiae)	1.29598	8.72013e-97
ENSG00000152620	NADKD1	NAD kinase domain containing 1	1.13084	7.72657e-72
ENSG00000114529	C3orf52	chromosome 3 open reading frame 52	1.99471	0.0132548
ENSG00000198185	ZNF334	zinc finger protein 334	2.46433	3.84069e-237
ENSG00000147614	ATP6V0D2	ATPase, H+ transporting, lysosomal 38kDa, V0 subunit d2	1.41309	0.000467312
ENSG00000125378	BMP4	bone morphogenetic protein 4	1.43758	1.77808e-10
ENSG00000176597	B3GNT5	UDP-GlcNAc:betaGal beta-1,3-N-acetylglucosaminyltransferase 5	1.00274	8.83246e-07
ENSG00000260556	CTD-2382E5.3		1.65026	1.35742e-07
ENSG00000128335	APOL2	apolipoprotein L, 2	1.39008	6.60777e-177
ENSG00000267321	RP11-1094M14.11		2.1697	0
ENSG00000147592	LACTB2	lactamase, beta 2	1.05444	2.14207e-56
ENSG00000184635	ZNF93	zinc finger protein 93	3.8317	1.66235e-22
ENSG00000260708	CTA-29F11.1		2.31378	4.53763e-194
ENSG00000105810	CDK6	cyclin-dependent kinase 6	1.98491	1.50904e-107
ENSG00000237187	RP11-65F13.2		2.74884	2.4961e-52
ENSG00000256771	ZNF253	zinc finger protein 253	2.0754	1.30959e-06
ENSG00000162413	KLHL21	kelch-like 21 (Drosophila)	1.08904	1.46754e-82
ENSG00000162337	LRP5	low density lipoprotein receptor-related protein 5	1.16003	1.55761e-33
ENSG00000105058	FAM32A	family with sequence similarity 32, member A	1.27229	0
ENSG00000165617	DACT1	dapper, antagonist of beta-catenin, homolog 1 (Xenopus laevis)	1.02741	1.31954e-33
ENSG00000167118	URM1	ubiquitin related modifier 1	1.27902	1.77334e-73
ENSG00000123610	TNFAIP6	tumor necrosis factor, alpha-induced protein 6	1.50803	4.49087e-06
ENSG00000259943	RP1-39G22.7		1.04224	9.86338e-52
ENSG00000128683	GAD1	glutamate decarboxylase 1 (brain, 67kDa)	1.53949	4.17279e-06
ENSG00000186501	TMEM222	transmembrane protein 222	1.06522	8.83775e-64
ENSG00000169976	SF3B5	splicing factor 3b, subunit 5, 10kDa	1.17503	3.29785e-70
ENSG00000115594	IL1R1	interleukin 1 receptor, type I	1.55523	0.000804705
ENSG00000168096	ANKS3	ankyrin repeat and sterile alpha motif domain containing 3	1.16093	1.73418e-51
ENSG00000169330	KIAA1024	KIAA1024	1.22274	8.6739e-22
ENSG00000183454	GRIN2A	glutamate receptor, ionotropic, N-methyl D-aspartate 2A	2.18515	7.84259e-05
ENSG00000137877	SPTBN5	spectrin, beta, non-erythrocytic 5	1.04592	1.36883e-11
ENSG00000261115	TMEM178B	transmembrane protein 178B	2.40761	1.20081e-10
ENSG00000171757	LRRC34	leucine rich repeat containing 34	1.31261	3.00168e-07
ENSG00000168811	IL12A	interleukin 12A (natural killer cell stimulatory factor 1, cytotoxic lymphocyte maturation factor 1, p35)	2.89917	7.95882e-10
ENSG00000102349	KLF8	Kruppel-like factor 8	1.06208	0.00886216
ENSG00000255717	SNHG1	small nucleolar RNA host gene 1 (non-protein coding)	1.6837	4.07438e-275
ENSG00000186806	VSIG10L	V-set and immunoglobulin domain containing 10 like	1.12122	1.03094e-05
ENSG00000140931	CMTM3	CKLF-like MARVEL transmembrane domain containing 3	2.33441	0
ENSG00000164176	EDIL3	EGF-like repeats and discoidin I-like domains 3	3.31799	1.0941e-122
ENSG00000151952	TMEM132D	transmembrane protein 132D	2.2121	0.0021717
ENSG00000076770	MBNL3	muscleblind-like splicing regulator 3	1.94429	0.00715423
ENSG00000117152	RGS4	regulator of G-protein signaling 4	1.26161	0.000955472
ENSG00000138867	C22orf13	chromosome 22 open reading frame 13	1.07464	7.98403e-71
ENSG00000267106	CTD-3116E22.4	uncharacterized protein LOC284385	1.1118	1.418e-24
ENSG00000188511	C22orf34	chromosome 22 open reading frame 34	1.52535	1.08726e-83
ENSG00000198093	ZNF649	zinc finger protein 649	1.38437	2.31254e-39
ENSG00000174695	TMEM167A	transmembrane protein 167A	1.14664	0
ENSG00000100522	GNPNAT1	glucosamine-phosphate N-acetyltransferase 1	1.17125	3.78465e-135
ENSG00000168621	GDNF	glial cell derived neurotrophic factor	1.55267	0.044452
ENSG00000198346	ZNF813	zinc finger protein 813	1.07739	5.88141e-18
ENSG00000072506	HSD17B10	hydroxysteroid (17-beta) dehydrogenase 10	1.663	6.69948e-189
ENSG00000136098	NEK3	NIMA (never in mitosis gene a)-related kinase 3	1.16261	0.00752664
ENSG00000157168	NRG1	neuregulin 1	2.0829	0.000730987
ENSG00000106245	BUD31	BUD31 homolog (S. cerevisiae)	1.58315	3.28008e-170
ENSG00000196182	STK40	serine/threonine kinase 40	2.19522	0
ENSG00000112852	PCDHB2	protocadherin beta 2	2.00139	0.00231197
ENSG00000131471	AOC3	amine oxidase, copper containing 3 (vascular adhesion protein 1)	3.47751	4.72611e-214
ENSG00000261786	RP4-555D20.2		1.68532	0.048403
ENSG00000237836	PHKA2-AS1	PHKA2 antisense RNA 1	2.81737	0
ENSG00000248461	CTD-2207A17.1		1.69323	1.39907e-09
ENSG00000063245	EPN1	epsin 1	1.01751	2.05448e-39
ENSG00000160117	ANKLE1	ankyrin repeat and LEM domain containing 1	1.41667	1.04968e-35
ENSG00000155380	SLC16A1	solute carrier family 16, member 1 (monocarboxylic acid transporter 1)	1.02857	3.48973e-72
ENSG00000233922	AL133493.2		1.18169	6.28626e-36
ENSG00000198205	ZXDA	zinc finger, X-linked, duplicated A	1.70216	0.0174589
ENSG00000240849	TMEM189	transmembrane protein 189	1.36971	2.45969e-142
ENSG00000124260	MAGEA10	melanoma antigen family A, 10	4.39191	0
ENSG00000184903	IMMP2L	IMP2 inner mitochondrial membrane peptidase-like (S. cerevisiae)	1.21792	5.24523e-36
ENSG00000185862	EVI2B	ecotropic viral integration site 2B	1.15381	0.0154942
ENSG00000197857	ZNF44	zinc finger protein 44	3.79461	7.08873e-62
ENSG00000117682	DHDDS	dehydrodolichyl diphosphate synthase	1.01618	1.77524e-104
ENSG00000166049	PASD1	PAS domain containing 1	1.86913	1.93747e-155
ENSG00000129595	EPB41L4A	erythrocyte membrane protein band 4.1 like 4A	1.96621	1.64343e-14
ENSG00000260942	RP11-27M15.1		2.50325	1.88849e-171
ENSG00000124702	KLHDC3	kelch domain containing 3	1.90267	0
ENSG00000064300	NGFR	nerve growth factor receptor	1.9878	9.40031e-34
ENSG00000225768	RP11-127O4.3		1.46846	3.90893e-07
ENSG00000153714	LURAP1L	leucine rich adaptor protein 1-like	2.04689	6.47537e-224
ENSG00000130165	ELOF1	elongation factor 1 homolog (S. cerevisiae)	1.43707	1.0773e-55
ENSG00000149091	DGKZ	diacylglycerol kinase, zeta	1.05217	3.69867e-36
ENSG00000182307	C8orf33	chromosome 8 open reading frame 33	1.14431	7.78865e-86
ENSG00000204514	ZNF814	zinc finger protein 814	1.31937	1.41568e-67
ENSG00000120055	C10orf95	chromosome 10 open reading frame 95	1.40529	3.2055e-66
ENSG00000080493	SLC4A4	solute carrier family 4, sodium bicarbonate cotransporter, member 4	1.79224	4.88453e-07
ENSG00000256683	ZNF350	zinc finger protein 350	1.21137	3.52372e-37
ENSG00000167562	ZNF701	zinc finger protein 701	1.73525	2.17594e-65
ENSG00000246985	SOCS2-AS1	SOCS2 antisense RNA 1	1.14172	3.66178e-10
ENSG00000177106	EPS8L2	EPS8-like 2	1.6999	2.50086e-66
ENSG00000197375	SLC22A5	solute carrier family 22 (organic cation/carnitine transporter), member 5	2.59428	1.86412e-122
ENSG00000243943	ZNF512	zinc finger protein 512	1.37276	2.18366e-140
ENSG00000131652	THOC6	THO complex 6 homolog (Drosophila)	1.87072	2.61867e-85
ENSG00000267100	ILF3-AS1	ILF3 antisense RNA 1 (head to head)	1.85485	3.30988e-282
ENSG00000120149	MSX2	msh homeobox 2	3.35947	7.6168e-08
ENSG00000120093	HOXB3	homeobox B3	1.23334	2.78652e-19
ENSG00000005801	ZNF195	zinc finger protein 195	1.23289	1.13418e-86
ENSG00000234284	ZNF879	zinc finger protein 879	3.87184	4.57578e-82
ENSG00000188242	CTD-2228K2.5	Uncharacterized protein	1.20404	4.16964e-77
ENSG00000169740	ZNF32	zinc finger protein 32	2.095	3.7678e-126
ENSG00000171174	RBKS	ribokinase	2.93235	1.70758e-114
ENSG00000196263	ZNF471	zinc finger protein 471	1.74341	3.99813e-43
ENSG00000104825	NFKBIB	nuclear factor of kappa light polypeptide gene enhancer in B-cells inhibitor, beta	1.34353	7.34749e-140
ENSG00000025772	TOMM34	translocase of outer mitochondrial membrane 34	1.32437	3.7656e-258
ENSG00000158427	TMSB15B	thymosin beta 15B	1.20309	1.82894e-06
ENSG00000204604	ZNF468	zinc finger protein 468	2.36949	1.72489e-152
ENSG00000126003	PLAGL2	pleiomorphic adenoma gene-like 2	1.16842	4.53387e-214
ENSG00000130635	COL5A1	collagen, type V, alpha 1	3.53841	0
ENSG00000185904	RP11-178A10.1		1.18812	7.82694e-31
ENSG00000104047	DTWD1	DTW domain containing 1	1.58945	6.09021e-84
ENSG00000126562	WNK4	WNK lysine deficient protein kinase 4	4.38393	0
ENSG00000165171	WBSCR27	Williams Beuren syndrome chromosome region 27	1.16195	2.27402e-07
ENSG00000232677	LINC00665	long intergenic non-protein coding RNA 665	4.21223	0
ENSG00000186432	KPNA4	karyopherin alpha 4 (importin alpha 3)	1.12942	0
ENSG00000240429	LRRFIP1P1	leucine rich repeat (in FLII) interacting protein 1 pseudogene 1	1.03147	0.0122646
ENSG00000255310	AF131215.2		2.61709	2.75794e-42
ENSG00000012171	SEMA3B	sema domain, immunoglobulin domain (Ig), short basic domain, secreted, (semaphorin) 3B	1.1766	7.44798e-24
ENSG00000181924	CHCHD8	coiled-coil-helix-coiled-coil-helix domain containing 8	1.02508	1.53032e-59
ENSG00000261296	RP11-299H22.6		1.03053	4.09789e-20
ENSG00000197168	NEK5	NIMA (never in mitosis gene a)-related kinase 5	1.00727	0.000592885
ENSG00000168795	ZBTB5	zinc finger and BTB domain containing 5	1.18077	3.59463e-91
ENSG00000134297	PLEKHA8P1	pleckstrin homology domain containing, family A member 8 pseudogene 1	3.10049	1.94956e-112
ENSG00000122641	INHBA	inhibin, beta A	1.04482	6.19902e-12
ENSG00000105676	ARMC6	armadillo repeat containing 6	1.12719	1.23126e-34
ENSG00000197863	ZNF790	zinc finger protein 790	1.00382	1.93108e-07
ENSG00000236404	RP11-125B21.2		1.09011	7.16668e-05
ENSG00000133134	BEX2	brain expressed X-linked 2	4.67873	5.7907e-21
ENSG00000165271	NOL6	nucleolar protein family 6 (RNA-associated)	1.3987	5.99948e-128
ENSG00000162944	RFTN2	raftlin family member 2	1.11862	5.79413e-11
ENSG00000140285	FGF7	fibroblast growth factor 7	1.23619	8.07018e-10
ENSG00000185652	NTF3	neurotrophin 3	1.67273	0.0498522
ENSG00000158220	ESYT3	extended synaptotagmin-like protein 3	2.01156	1.03703e-10
ENSG00000168283	BMI1	BMI1 polycomb ring finger oncogene	1.57254	0
ENSG00000232527	RP11-14N7.2		1.89536	1.41013e-45
ENSG00000124171	PARD6B	par-6 partitioning defective 6 homolog beta (C. elegans)	1.7057	6.18545e-79
ENSG00000176769	TCERG1L	transcription elongation regulator 1-like	2.06392	0.00298423
ENSG00000257898	RP11-496I2.3		1.11122	1.72965e-24
ENSG00000107175	CREB3	cAMP responsive element binding protein 3	1.05154	5.21913e-85
ENSG00000114942	EEF1B2	eukaryotic translation elongation factor 1 beta 2	1.02063	2.43161e-62
ENSG00000006652	IFRD1	interferon-related developmental regulator 1	1.44567	3.06223e-147
ENSG00000189299	FOXR2	forkhead box R2	2.50886	1.70307e-265
ENSG00000136167	LCP1	lymphocyte cytosolic protein 1 (L-plastin)	1.91938	1.71237e-112
ENSG00000261355	RP11-698N11.4		1.00909	1.48202e-15
ENSG00000122390	NAA60	N(alpha)-acetyltransferase 60, NatF catalytic subunit	1.14654	2.02275e-84
ENSG00000120805	ARL1	ADP-ribosylation factor-like 1	1.12965	8.32468e-99
ENSG00000081665	ZNF506	zinc finger protein 506	2.86021	1.3691e-146
ENSG00000134058	CDK7	cyclin-dependent kinase 7	1.42085	2.90945e-161
ENSG00000244879	GABPB1-AS1	GABPB1 antisense RNA 1	1.0054	3.45313e-52
ENSG00000109171	SLAIN2	SLAIN motif family, member 2	1.15628	2.69109e-159
ENSG00000162892	IL24	interleukin 24	2.48018	1.30038e-30
ENSG00000196313	POM121	POM121 transmembrane nucleoporin	1.16794	1.27011e-204
ENSG00000198932	GPRASP1	G protein-coupled receptor associated sorting protein 1	1.68456	0.0020719
ENSG00000166002	C11orf75	chromosome 11 open reading frame 75	2.26786	1.37593e-54
ENSG00000205808	PPAPDC2	phosphatidic acid phosphatase type 2 domain containing 2	1.14158	3.406e-69
ENSG00000166578	IQCD	IQ motif containing D	2.31772	5.40364e-106
ENSG00000102053	ZC3H12B	zinc finger CCCH-type containing 12B	1.68872	1.28941e-42
ENSG00000240225	ZNF542	zinc finger protein 542	3.08239	0
ENSG00000223547	ZNF844	zinc finger protein 844	1.53973	1.19478e-49
ENSG00000171658	RP11-443P15.2		1.55742	1.00312e-25
ENSG00000247092	SNHG10	small nucleolar RNA host gene 10 (non-protein coding)	2.95046	0
ENSG00000135074	ADAM19	ADAM metallopeptidase domain 19	3.48601	2.59488e-122
ENSG00000120068	HOXB8	homeobox B8	2.17086	4.07059e-121
ENSG00000198934	MAGEE1	melanoma antigen family E, 1	1.23301	2.4294e-22
ENSG00000251003	RP11-152P17.2		1.38434	2.90743e-43
ENSG00000182742	HOXB4	homeobox B4	1.10394	1.02982e-19
ENSG00000205628	GS1-179L18.1		1.00745	1.78747e-20
ENSG00000147535	PPAPDC1B	phosphatidic acid phosphatase type 2 domain containing 1B	1.90177	0
ENSG00000170516	COX7B2	cytochrome c oxidase subunit VIIb2	1.61008	4.22822e-61
ENSG00000163040	CCDC74A	coiled-coil domain containing 74A	1.03604	2.32869e-05
ENSG00000196295	AC005154.6		1.80022	0
ENSG00000218725	RP11-174C7.2		4.21471	8.12968e-15
ENSG00000265519	CTD-3157E16.1		1.13429	0.0221538
ENSG00000059573	ALDH18A1	aldehyde dehydrogenase 18 family, member A1	2.09119	4.44132e-204
ENSG00000139174	PRICKLE1	prickle homolog 1 (Drosophila)	2.1205	8.23451e-18
ENSG00000048162	NOP16	NOP16 nucleolar protein homolog (yeast)	1.10564	7.67198e-68
ENSG00000119559	C19orf25	chromosome 19 open reading frame 25	1.43959	7.02005e-75
ENSG00000111913	FAM65B	family with sequence similarity 65, member B	2.9465	1.16253e-08
ENSG00000103723	AP3B2	adaptor-related protein complex 3, beta 2 subunit	1.61845	1.10158e-05
ENSG00000175048	ZDHHC14	zinc finger, DHHC-type containing 14	1.63558	1.19861e-86
ENSG00000161847	RAVER1	ribonucleoprotein, PTB-binding 1	1.25237	1.90889e-78
ENSG00000102554	KLF5	Kruppel-like factor 5 (intestinal)	1.28604	1.1545e-167
ENSG00000006194	ZNF263	zinc finger protein 263	1.30328	9.40402e-193
ENSG00000158050	DUSP2	dual specificity phosphatase 2	2.52331	0.00136863
ENSG00000260260	RP11-304L19.5		3.44735	0
ENSG00000197937	ZNF347	zinc finger protein 347	2.17454	1.48999e-17
ENSG00000234773	CTD-2666L21.1		2.3145	0.000578574
ENSG00000132388	UBE2G1	ubiquitin-conjugating enzyme E2G 1	1.05695	4.63184e-130
ENSG00000116337	AMPD2	adenosine monophosphate deaminase 2	1.09862	2.1514e-51
ENSG00000146021	KLHL3	kelch-like 3 (Drosophila)	1.35116	2.76288e-35
ENSG00000161179	YDJC	YdjC homolog (bacterial)	1.3082	1.18323e-36
ENSG00000188868	ZNF563	zinc finger protein 563	3.18897	7.93155e-14
ENSG00000250988	RP11-752G15.6		2.18683	3.27737e-125
ENSG00000261526	CTB-31O20.2		1.52791	5.9376e-49
ENSG00000229689	AC009237.1		1.04695	6.14738e-05
ENSG00000187815	ZNF642	zinc finger protein 642	2.23745	4.10473e-37
ENSG00000139329	LUM	lumican	1.94293	2.64447e-35
ENSG00000230002	ALMS1-IT1	ALMS1 intronic transcript 1 (non-protein coding)	1.3239	1.42331e-39
ENSG00000069696	DRD4	dopamine receptor D4	1.53274	1.70773e-27
ENSG00000235989	MORC2-AS1	MORC2 antisense RNA 1	1.73899	2.43928e-65
ENSG00000120784	ZFP30	zinc finger protein 30 homolog (mouse)	3.12929	2.27635e-268
ENSG00000167333	TRIM68	tripartite motif containing 68	1.00143	8.99184e-77
ENSG00000126752	SSX1	synovial sarcoma, X breakpoint 1	1.66211	3.60116e-63
ENSG00000109738	GLRB	glycine receptor, beta	1.68886	2.78956e-12
ENSG00000169131	ZNF354A	zinc finger protein 354A	1.51047	5.59698e-48
ENSG00000063322	MED29	mediator complex subunit 29	1.05201	1.09195e-273
ENSG00000160336	ZNF761	zinc finger protein 761	1.17671	8.01353e-30
ENSG00000137460	FHDC1	FH2 domain containing 1	1.24191	1.86068e-15
ENSG00000204839	C8orf73	chromosome 8 open reading frame 73	1.71595	1.92735e-20
ENSG00000221944	TIGD1	tigger transposable element derived 1	1.9543	1.14468e-214
ENSG00000213931	HBE1	hemoglobin, epsilon 1	1.73495	2.36371e-36
ENSG00000147883	CDKN2B	cyclin-dependent kinase inhibitor 2B (p15, inhibits CDK4)	3.25688	0
ENSG00000196867	ZFP28	zinc finger protein 28 homolog (mouse)	1.00755	3.07077e-21
ENSG00000258038	CTD-2384A14.1		1.84739	3.13214e-58
ENSG00000245522	RP11-540A21.2		1.11194	1.84803e-19
ENSG00000115380	EFEMP1	EGF containing fibulin-like extracellular matrix protein 1	1.70182	0.0411483
ENSG00000214970	CTC-297N7.7		2.09809	4.92145e-34
ENSG00000137496	IL18BP	interleukin 18 binding protein	2.67618	0
ENSG00000109083	IFT20	intraflagellar transport 20 homolog (Chlamydomonas)	1.13974	7.21905e-154
ENSG00000267279	RP11-879F14.2		2.94678	0.000101217
ENSG00000070831	CDC42	cell division cycle 42 (GTP binding protein, 25kDa)	1.68836	0
ENSG00000160688	FLAD1	FAD1 flavin adenine dinucleotide synthetase homolog (S. cerevisiae)	1.1945	5.01565e-61
ENSG00000127989	MTERF	mitochondrial transcription termination factor	1.56345	1.46544e-158
ENSG00000100285	NEFH	neurofilament, heavy polypeptide	1.99677	6.56783e-08
ENSG00000187824	TMEM220	transmembrane protein 220	1.71394	0.000230339
ENSG00000223749	AC004383.4		2.43087	5.41939e-132
ENSG00000169933	FRMPD4	FERM and PDZ domain containing 4	1.68169	0.0353468
ENSG00000167766	ZNF83	zinc finger protein 83	1.04912	1.14256e-110
ENSG00000138759	FRAS1	Fraser syndrome 1	1.36827	1.84788e-15
ENSG00000188641	DPYD	dihydropyrimidine dehydrogenase	2.40607	9.96321e-05
ENSG00000204524	ZNF805	zinc finger protein 805	1.02293	2.65718e-76
ENSG00000113838	TBCCD1	TBCC domain containing 1	1.38059	1.09383e-79
ENSG00000196418	ZNF124	zinc finger protein 124	2.77669	4.68411e-81
ENSG00000162722	TRIM58	tripartite motif containing 58	3.28239	1.55655e-56
ENSG00000142627	EPHA2	EPH receptor A2	1.04594	1.25082e-34
ENSG00000229178	AC069513.4		2.17485	3.65584e-91
ENSG00000260231	RP4-659J6.2		1.68611	1.38349e-106
ENSG00000128645	HOXD1	homeobox D1	1.12024	4.47706e-17
ENSG00000085563	ABCB1	ATP-binding cassette, sub-family B (MDR/TAP), member 1	1.14223	1.78397e-40
ENSG00000267102	RP11-686D22.7		3.12468	3.17932e-05
ENSG00000130054	FAM155B	family with sequence similarity 155, member B	2.08749	5.33086e-64
ENSG00000144452	ABCA12	ATP-binding cassette, sub-family A (ABC1), member 12	1.8787	0.0251591
ENSG00000135632	SMYD5	SMYD family member 5	1.50916	6.10979e-118
ENSG00000228649	AC005682.5		2.64784	4.08838e-214
ENSG00000196421	LINC00176	long intergenic non-protein coding RNA 176	1.59198	3.06447e-66
ENSG00000197044	ZNF441	zinc finger protein 441	1.52088	6.3567e-34
ENSG00000169905	TOR1AIP2	torsin A interacting protein 2	1.00728	0
ENSG00000259869	AL022344.7		1.21005	9.30161e-13
ENSG00000198000	NOL8	nucleolar protein 8	1.07563	1.20472e-227
ENSG00000256073	C21orf119	chromosome 21 open reading frame 119	1.28059	1.02638e-57
ENSG00000163293	NIPAL1	NIPA-like domain containing 1	1.99961	2.32277e-07
ENSG00000167355	AC104389.28		2.43215	2.49679e-72
ENSG00000196812	ZSCAN16	zinc finger and SCAN domain containing 16	1.0433	6.26393e-35
ENSG00000219481	NBPF1	neuroblastoma breakpoint family, member 1	1.295	1.57526e-161
ENSG00000255375	RP1-65P5.5		2.28043	6.21843e-57
ENSG00000089818	NECAP1	NECAP endocytosis associated 1	1.70752	2.76218e-153
ENSG00000240244	GAPDHP33	glyceraldehyde 3 phosphate dehydrogenase pseudogene 33	1.03897	2.19146e-06
ENSG00000143878	RHOB	ras homolog family member B	1.89481	0
ENSG00000143816	WNT9A	wingless-type MMTV integration site family, member 9A	2.25969	2.42105e-12
ENSG00000266795	RP11-744K17.9		1.96266	5.29398e-81
ENSG00000162461	SLC25A34	solute carrier family 25, member 34	2.42194	1.95198e-110
ENSG00000136244	IL6	interleukin 6 (interferon, beta 2)	4.67876	4.53457e-21
ENSG00000225345	SNX18P3	sorting nexin 18 pseudogene 3	1.12874	0.0147638
ENSG00000187678	SPRY4	sprouty homolog 4 (Drosophila)	1.22026	2.90932e-57
ENSG00000255042	RP11-347H15.5		1.12841	1.57597e-22
ENSG00000050820	BCAR1	breast cancer anti-estrogen resistance 1	1.18303	1.62454e-33
ENSG00000106868	SUSD1	sushi domain containing 1	1.12168	6.64812e-07
ENSG00000168256	NKIRAS2	NFKB inhibitor interacting Ras-like 2	1.43986	7.69849e-229
ENSG00000168288	MMADHC	methylmalonic aciduria (cobalamin deficiency) cblD type, with homocystinuria	1.0698	0
ENSG00000251192	ZNF674	zinc finger protein 674	1.33095	3.32373e-15
ENSG00000151388	ADAMTS12	ADAM metallopeptidase with thrombospondin type 1 motif, 12	1.6971	4.10356e-05
ENSG00000006788	MYH13	myosin, heavy chain 13, skeletal muscle	1.9581	2.46438e-60
ENSG00000177599	ZNF491	zinc finger protein 491	2.57916	0.00100151
ENSG00000115290	GRB14	growth factor receptor-bound protein 14	2.95728	1.11092e-06
ENSG00000091831	ESR1	estrogen receptor 1	4.61061	1.13009e-61
ENSG00000198113	TOR4A	torsin family 4, member A	1.30387	4.81816e-24
ENSG00000197982	C1orf122	chromosome 1 open reading frame 122	1.30074	1.46106e-205
ENSG00000140043	PTGR2	prostaglandin reductase 2	1.18026	7.51017e-49
ENSG00000171522	PTGER4	prostaglandin E receptor 4 (subtype EP4)	3.32161	9.20708e-79
ENSG00000166352	C11orf74	chromosome 11 open reading frame 74	1.44859	1.75428e-99
ENSG00000250420	AACSP1	acetoacetyl-CoA synthetase pseudogene 1	2.00927	1.79288e-72
ENSG00000125864	BFSP1	beaded filament structural protein 1, filensin	1.04153	7.20491e-33
ENSG00000189212	DPY19L2P1	dpy-19-like 2 pseudogene 1 (C. elegans)	1.14025	0.00138464
ENSG00000007129	CEACAM21	carcinoembryonic antigen-related cell adhesion molecule 21	1.82258	3.00168e-07
ENSG00000231365	RP11-418J17.1		1.22828	8.9081e-101
ENSG00000162975	KCNF1	potassium voltage-gated channel, subfamily F, member 1	2.98223	1.96884e-05
ENSG00000242759	RP11-280F2.2		1.07193	8.45989e-27
ENSG00000142675	CNKSR1	connector enhancer of kinase suppressor of Ras 1	3.98874	8.99882e-161
ENSG00000253305	PCDHGB6	protocadherin gamma subfamily B, 6	1.55469	8.49785e-10
ENSG00000140006	WDR89	WD repeat domain 89	1.12759	2.43007e-51
ENSG00000155366	RHOC	ras homolog family member C	1.08402	3.40543e-43
ENSG00000198523	PLN	phospholamban	1.52277	0.0429188
ENSG00000060982	BCAT1	branched chain amino-acid transaminase 1, cytosolic	2.40664	2.74659e-06
ENSG00000198324	FAM109A	family with sequence similarity 109, member A	1.40593	1.73282e-44
ENSG00000160439	RDH13	retinol dehydrogenase 13 (all-trans/9-cis)	1.00951	1.13919e-72
ENSG00000197467	COL13A1	collagen, type XIII, alpha 1	2.49169	6.94905e-122
ENSG00000088766	CRLS1	cardiolipin synthase 1	1.03549	2.44324e-239
ENSG00000026559	KCNG1	potassium voltage-gated channel, subfamily G, member 1	2.91895	1.20633e-14
ENSG00000152242	C18orf25	chromosome 18 open reading frame 25	1.03579	2.98492e-70
ENSG00000260518	RP11-293B20.1		1.21955	3.69206e-16
ENSG00000263412	RP5-890E16.2		1.75781	6.86189e-33
ENSG00000266865	RP11-848P1.9		1.75616	0.0170911
ENSG00000152022	LIX1L	Lix1 homolog (mouse)-like	1.19064	5.22309e-92
ENSG00000137727	ARHGAP20	Rho GTPase activating protein 20	1.41852	7.20129e-07
ENSG00000164002	DEM1	defects in morphology 1 homolog (S. cerevisiae)	1.62714	1.46555e-56
ENSG00000117971	CHRNB4	cholinergic receptor, nicotinic, beta 4 (neuronal)	1.52256	0.000287977
ENSG00000170627	GTSF1	gametocyte specific factor 1	1.55833	5.46513e-25
ENSG00000233101	HOXB-AS3	HOXB cluster antisense RNA 3	1.49674	1.66897e-09
ENSG00000134986	NREP	neuronal regeneration related protein homolog (rat)	1.34535	2.032e-69
ENSG00000163874	ZC3H12A	zinc finger CCCH-type containing 12A	1.05824	9.11751e-22
ENSG00000058262	SEC61A1	Sec61 alpha 1 subunit (S. cerevisiae)	1.2201	1.43035e-44
ENSG00000248632	RP11-366M4.11		1.55861	4.1276e-08
ENSG00000158715	SLC45A3	solute carrier family 45, member 3	1.37334	2.69958e-37
ENSG00000171466	ZNF562	zinc finger protein 562	1.42118	2.81588e-63
ENSG00000189129	PLAC9	placenta-specific 9	1.7422	0.000173609
ENSG00000116922	C1orf109	chromosome 1 open reading frame 109	1.01618	8.20739e-205
ENSG00000169551	CXorf48	chromosome X open reading frame 48	2.13423	1.12331e-75
ENSG00000135917	SLC19A3	solute carrier family 19, member 3	2.13256	1.23156e-05
ENSG00000110025	SNX15	sorting nexin 15	2.75203	5.62172e-197
ENSG00000123870	ZNF137P	zinc finger protein 137, pseudogene	2.90089	2.26922e-17
ENSG00000149054	ZNF215	zinc finger protein 215	1.57734	1.06086e-31
ENSG00000156232	WHAMM	WAS protein homolog associated with actin, golgi membranes and microtubules	1.26711	3.42632e-99
ENSG00000221886	C5orf54	chromosome 5 open reading frame 54	1.01919	2.10802e-48
ENSG00000136856	SLC2A8	solute carrier family 2 (facilitated glucose transporter), member 8	1.76526	5.12175e-70
ENSG00000263235	RP11-461A8.4		1.3486	5.8052e-24
ENSG00000267745	RP11-686D22.8		3.13986	2.42243e-05
ENSG00000135835	KIAA1614	KIAA1614	1.64639	1.13318e-86
ENSG00000180611	MB21D2	Mab-21 domain containing 2	1.61721	4.65577e-215
ENSG00000130943	PKDREJ	polycystic kidney disease (polycystin) and REJ homolog (sperm receptor for egg jelly homolog, sea urchin)	1.66444	1.75834e-23
ENSG00000106571	GLI3	GLI family zinc finger 3	1.8921	2.60991e-259
ENSG00000174130	TLR6	toll-like receptor 6	2.35398	1.74895e-93
ENSG00000121578	B4GALT4	UDP-Gal:betaGlcNAc beta 1,4- galactosyltransferase, polypeptide 4	1.02077	2.64388e-127
ENSG00000168273	C3orf78	chromosome 3 open reading frame 78	1.73863	4.83476e-148
ENSG00000174206	C12orf66	chromosome 12 open reading frame 66	1.22575	2.61004e-41
ENSG00000254004	ZNF260	zinc finger protein 260	1.44498	6.90359e-64
ENSG00000041982	TNC	tenascin C	2.86658	1.16022e-118
ENSG00000232956	SNHG15	small nucleolar RNA host gene 15 (non-protein coding)	1.07173	8.80792e-31
ENSG00000106123	EPHB6	EPH receptor B6	1.18716	0.0167047
ENSG00000084628	NKAIN1	Na+/K+ transporting ATPase interacting 1	3.33827	5.08668e-21
ENSG00000198088	NUP62CL	nucleoporin 62kDa C-terminal like	2.59038	4.47601e-06
ENSG00000250588	IQCJ-SCHIP1	IQCJ-SCHIP1 readthrough	3.96304	3.0115e-16
ENSG00000150630	VEGFC	vascular endothelial growth factor C	2.19514	6.40232e-48
ENSG00000260924	AC004463.6		2.43273	1.16562e-115
ENSG00000125046	C3orf32	chromosome 3 open reading frame 32	1.13308	0.0423824
ENSG00000172031	EPHX4	epoxide hydrolase 4	1.68935	3.52798e-07
ENSG00000174151	CYB561D1	cytochrome b-561 domain containing 1	1.05458	3.62155e-86
ENSG00000088356	PDRG1	p53 and DNA-damage regulated 1	1.13967	3.01151e-101
ENSG00000125848	FLRT3	fibronectin leucine rich transmembrane protein 3	1.06467	0.0023738
ENSG00000177519	RPRM	reprimo, TP53 dependent G2 arrest mediator candidate	4.00034	6.63694e-09
ENSG00000183386	FHL3	four and a half LIM domains 3	1.41759	1.633e-108
ENSG00000188167	TMPPE	transmembrane protein with metallophosphoesterase domain	1.15524	7.053e-31
ENSG00000112599	GUCA1B	guanylate cyclase activator 1B (retina)	1.50231	1.86397e-22
ENSG00000162695	SLC30A7	solute carrier family 30 (zinc transporter), member 7	1.09206	1.15096e-188
ENSG00000228696	ARL17B	ADP-ribosylation factor-like 17B	1.48517	1.93942e-46
ENSG00000165138	ANKS6	ankyrin repeat and sterile alpha motif domain containing 6	1.01812	9.96306e-26
ENSG00000167600	CYP2S1	cytochrome P450, family 2, subfamily S, polypeptide 1	2.41108	0.000335722
ENSG00000196428	TSC22D2	TSC22 domain family, member 2	2.18799	0
ENSG00000213988	ZNF90	zinc finger protein 90	2.44669	2.38237e-11
ENSG00000235999	RP11-403I13.8		1.86639	1.70127e-18
ENSG00000197461	PDGFA	platelet-derived growth factor alpha polypeptide	2.40303	1.99892e-16
ENSG00000170166	HOXD4	homeobox D4	1.02226	4.34358e-37
ENSG00000108433	GOSR2	golgi SNAP receptor complex member 2	1.8944	5.03282e-121
ENSG00000132570	PCBD2	pterin-4 alpha-carbinolamine dehydratase/dimerization cofactor of hepatocyte nuclear factor 1 alpha (TCF1) 2	1.44212	4.42907e-25
ENSG00000181894	ZNF329	zinc finger protein 329	1.49454	1.49775e-76
ENSG00000187775	DNAH17	dynein, axonemal, heavy chain 17	2.23541	4.44351e-67
ENSG00000224616	RP11-305E17.6		1.31448	1.72926e-17
ENSG00000213865	C8orf44	chromosome 8 open reading frame 44	1.22576	3.1478e-31
ENSG00000245213	RP11-10K16.1		1.55806	0.000681475
ENSG00000163738	MTHFD2L	methylenetetrahydrofolate dehydrogenase (NADP+ dependent) 2-like	1.7176	6.99991e-221
ENSG00000172059	KLF11	Kruppel-like factor 11	1.75157	6.06448e-48
ENSG00000182141	ZNF708	zinc finger protein 708	1.2299	2.677e-32
ENSG00000197013	ZNF429	zinc finger protein 429	1.24985	3.06204e-05
ENSG00000260329	RP11-412D9.4		1.1514	5.6373e-16
ENSG00000087589	CASS4	Cas scaffolding protein family member 4	1.89327	4.02132e-42
ENSG00000197915	HRNR	hornerin	2.30412	0.00134073
ENSG00000188295	ZNF669	zinc finger protein 669	2.13322	2.3793e-49
ENSG00000147257	GPC3	glypican 3	1.5608	4.15832e-08
ENSG00000107821	KAZALD1	Kazal-type serine peptidase inhibitor domain 1	1.64603	2.38828e-44
ENSG00000182310	LINC00085	long intergenic non-protein coding RNA 85	1.21008	9.6778e-17
ENSG00000110104	CCDC86	coiled-coil domain containing 86	1.28216	6.04916e-74
ENSG00000251350	RP11-328N19.1		1.56455	1.09132e-24
ENSG00000130332	LSM7	LSM7 homolog, U6 small nuclear RNA associated (S. cerevisiae)	1.35733	3.98032e-70
ENSG00000154153	FAM134B	family with sequence similarity 134, member B	1.43341	1.4769e-82
ENSG00000149050	ZNF214	zinc finger protein 214	1.58733	4.84073e-08
ENSG00000141150	RASL10B	RAS-like, family 10, member B	1.84648	2.43927e-102
ENSG00000167968	DNASE1L2	deoxyribonuclease I-like 2	1.21674	5.09534e-16
ENSG00000267427	CTC-503J8.6		1.08374	6.57008e-92
ENSG00000148935	GAS2	growth arrest-specific 2	1.96063	1.40348e-10
ENSG00000233110	RP11-301L8.2		1.1325	1.6199e-08
ENSG00000165323	FAT3	FAT tumor suppressor homolog 3 (Drosophila)	1.70594	0.000972692
ENSG00000120075	HOXB5	homeobox B5	1.7955	0.000144924
ENSG00000114767	RRP9	ribosomal RNA processing 9, small subunit (SSU) processome component, homolog (yeast)	1.02984	5.63674e-34
ENSG00000174498	IGDCC3	immunoglobulin superfamily, DCC subclass, member 3	1.35036	1.08556e-14
ENSG00000148798	INA	internexin neuronal intermediate filament protein, alpha	3.72756	7.09015e-16
ENSG00000256087	ZNF432	zinc finger protein 432	1.36061	1.33975e-63
ENSG00000261211	RP1-80N2.3		1.59869	3.43151e-28
ENSG00000187531	SIRT7	sirtuin 7	1.17774	3.89884e-26
ENSG00000123612	ACVR1C	activin A receptor, type IC	1.14334	0.00351039
ENSG00000155897	ADCY8	adenylate cyclase 8 (brain)	1.49381	0.022004
ENSG00000172071	EIF2AK3	eukaryotic translation initiation factor 2-alpha kinase 3	1.69371	0
ENSG00000234771	RP11-395P17.3		1.43488	1.34662e-87
ENSG00000146707	POMZP3	POM121 and ZP3 fusion	1.55765	1.85085e-15
ENSG00000260641	RP11-1299A16.3		1.3282	1.35831e-18
ENSG00000072756	TRNT1	tRNA nucleotidyl transferase, CCA-adding, 1	1.14563	9.44591e-158
ENSG00000141682	PMAIP1	phorbol-12-myristate-13-acetate-induced protein 1	1.9427	1.66734e-65
ENSG00000130600	H19	H19, imprinted maternally expressed transcript (non-protein coding)	1.09284	9.87139e-11
ENSG00000241472	RP11-204J18.3		1.8739	9.30425e-45
ENSG00000160321	ZNF208	zinc finger protein 208	3.24448	7.49165e-118
ENSG00000163032	VSNL1	visinin-like 1	1.18981	0.0224924
ENSG00000154736	ADAMTS5	ADAM metallopeptidase with thrombospondin type 1 motif, 5	1.71923	0.000461979
ENSG00000253214	RP11-1149M10.2		1.42595	2.94136e-18
ENSG00000197608	ZNF841	zinc finger protein 841	2.45472	1.5718e-299
ENSG00000230453	ANKRD18B	ankyrin repeat domain 18B	1.5009	0.00787175
ENSG00000155849	ELMO1	engulfment and cell motility 1	1.38837	4.94079e-05
ENSG00000266918	RP11-798G7.8		1.50826	1.74804e-32
ENSG00000197134	ZNF257	zinc finger protein 257	1.91124	2.17876e-38
ENSG00000235590	GNAS-AS1	GNAS antisense RNA 1	1.1028	1.63454e-11
ENSG00000253669	KB-1732A1.1		4.18564	8.15654e-26
ENSG00000225032	RP11-228B15.4		1.10126	2.58327e-27
ENSG00000267265	CTC-550B14.7		2.52504	5.68352e-128
ENSG00000226141	AF277315.13		1.04975	6.62002e-05
ENSG00000266885	RP11-744K17.2		1.1559	2.179e-08
ENSG00000232274	BX571672.2		2.00382	3.37995e-79
ENSG00000177932	ZNF354C	zinc finger protein 354C	2.27572	1.98179e-86
ENSG00000186628	FSD2	fibronectin type III and SPRY domain containing 2	2.58405	2.32309e-88
ENSG00000259891	CTA-204B4.2		1.9404	1.55196e-91
ENSG00000140398	NEIL1	nei endonuclease VIII-like 1 (E. coli)	1.22249	7.33481e-56
ENSG00000138744	NAAA	N-acylethanolamine acid amidase	1.26626	5.77798e-26
ENSG00000249196	RP11-669N7.2		3.77836	5.03006e-155
ENSG00000118523	CTGF	connective tissue growth factor	3.96652	0
ENSG00000250829	RP11-11N5.1		1.02504	1.37676e-09
ENSG00000224032	EPB41L4A-AS1	EPB41L4A antisense RNA 1	1.50963	3.77968e-54
ENSG00000236255	AC009404.2		1.54099	1.72106e-50
ENSG00000234753	RP11-328M4.2		1.55896	1.15362e-16
ENSG00000014257	ACPP	acid phosphatase, prostate	2.27927	0.00271378
ENSG00000198393	ZNF26	zinc finger protein 26	1.24407	1.21395e-122
ENSG00000159307	SCUBE1	signal peptide, CUB domain, EGF-like 1	1.088	6.84571e-09
ENSG00000234741	GAS5	growth arrest-specific 5 (non-protein coding)	1.40814	6.87331e-147
ENSG00000239335	RP11-745O10.2		1.98752	2.48184e-40
ENSG00000227124	ZNF717	zinc finger protein 717	1.06866	3.06728e-43
ENSG00000162849	KIF26B	kinesin family member 26B	1.08434	7.39928e-05
ENSG00000113369	ARRDC3	arrestin domain containing 3	1.26691	3.65459e-152
ENSG00000175322	ZNF519	zinc finger protein 519	1.0007	2.76096e-26
ENSG00000258754	CTD-3049M7.1		1.65669	1.60719e-37
ENSG00000250899	RP11-253E3.3		1.96244	9.28277e-88
ENSG00000106948	AKNA	AT-hook transcription factor	1.16127	2.72375e-25
ENSG00000243422	RP11-413E6.1		1.62352	8.22888e-05
ENSG00000183049	CAMK1D	calcium/calmodulin-dependent protein kinase ID	1.15641	0.000500705
ENSG00000162772	ATF3	activating transcription factor 3	1.06113	2.62261e-25
ENSG00000257815	RP11-611E13.2		1.78806	6.71887e-36
ENSG00000163807	KIAA1143	KIAA1143	1.10635	4.58512e-21
ENSG00000167625	ZNF526	zinc finger protein 526	1.43889	1.7015e-74
ENSG00000188707	C7orf29	chromosome 7 open reading frame 29	1.86914	3.43793e-64
ENSG00000138111	TMEM180	transmembrane protein 180	1.25656	1.44179e-22
ENSG00000118526	TCF21	transcription factor 21	1.96472	3.34775e-38
ENSG00000243742	RPLP0P2	ribosomal protein, large, P0 pseudogene 2	2.47739	4.55595e-89
ENSG00000223461	AC004471.9		1.32058	4.38938e-17
ENSG00000118514	ALDH8A1	aldehyde dehydrogenase 8 family, member A1	1.12032	6.64847e-09
ENSG00000149150	SLC43A1	solute carrier family 43, member 1	1.09993	6.42553e-47
ENSG00000068323	TFE3	transcription factor binding to IGHM enhancer 3	1.62355	2.02213e-236
ENSG00000099834	CDHR5	cadherin-related family member 5	1.12131	1.9625e-07
ENSG00000230844	ZNF674-AS1	ZNF674 antisense RNA 1	2.83741	5.15667e-282
ENSG00000089169	RPH3A	rabphilin 3A homolog (mouse)	3.08812	1.51055e-06
ENSG00000175787	ZNF169	zinc finger protein 169	1.06246	1.29618e-26
ENSG00000121579	NAA50	N(alpha)-acetyltransferase 50, NatE catalytic subunit	1.21108	9.10167e-182
ENSG00000142556	ZNF614	zinc finger protein 614	1.08763	6.14937e-35
ENSG00000077522	ACTN2	actinin, alpha 2	1.01195	0.000142363
ENSG00000255153	CTD-2245O6.1		1.14207	1.29883e-11
ENSG00000189046	ALKBH2	alkB, alkylation repair homolog 2 (E. coli)	1.2471	2.65115e-42
ENSG00000164022	AIMP1	aminoacyl tRNA synthetase complex-interacting multifunctional protein 1	1.09523	7.81255e-104
ENSG00000196172	ZNF681	zinc finger protein 681	1.97641	3.02093e-26
ENSG00000259726	RP11-671M22.5		1.74223	0.00495188
ENSG00000197124	ZNF682	zinc finger protein 682	2.58488	1.61354e-10
ENSG00000235111	RP1-29C18.8		3.53626	5.5153e-142
ENSG00000132359	RAP1GAP2	RAP1 GTPase activating protein 2	2.28333	2.53046e-149
ENSG00000188396	TCTEX1D4	Tctex1 domain containing 4	1.17152	4.92934e-25
ENSG00000135213	POM121C	POM121 transmembrane nucleoporin C	1.44099	4.08428e-203
ENSG00000258708	RP11-537P22.1	HCG1804255; Uncharacterized protein	3.05391	1.85916e-08
ENSG00000225880	LINC00115	long intergenic non-protein coding RNA 115	1.37624	1.18896e-41
ENSG00000180257	ZNF816	zinc finger protein 816	1.98108	1.32348e-59
ENSG00000214706	IFRD2	interferon-related developmental regulator 2	1.47373	1.83921e-86
ENSG00000137221	TJAP1	tight junction associated protein 1 (peripheral)	1.04758	1.78158e-74
ENSG00000235919	ASH1L-AS1	ASH1L antisense RNA 1	2.01874	9.79548e-59
ENSG00000172260	NEGR1	neuronal growth regulator 1	3.73615	1.16234e-29
ENSG00000196214	ZNF766	zinc finger protein 766	1.65797	1.69977e-73
ENSG00000104237	RP1	retinitis pigmentosa 1 (autosomal dominant)	1.50395	0.0350868
ENSG00000143367	TUFT1	tuftelin 1	1.53091	7.07101e-114
ENSG00000163545	NUAK2	NUAK family, SNF1-like kinase, 2	3.44058	3.34716e-220
ENSG00000175894	TSPEAR	thrombospondin-type laminin G domain and EAR repeats	1.75987	3.45949e-23
ENSG00000123685	BATF3	basic leucine zipper transcription factor, ATF-like 3	1.25641	5.58855e-07
ENSG00000099282	TSPAN15	tetraspanin 15	1.16219	6.43515e-20
ENSG00000070182	SPTB	spectrin, beta, erythrocytic	1.75707	5.41739e-138
ENSG00000163877	SNIP1	Smad nuclear interacting protein 1	1.01314	1.97666e-139
ENSG00000161912	ADCY10P1	adenylate cyclase 10 (soluble) pseudogene 1	2.13926	4.55963e-164
ENSG00000041353	RAB27B	RAB27B, member RAS oncogene family	4.39642	1.12006e-12
ENSG00000002919	SNX11	sorting nexin 11	1.10175	2.15966e-146
ENSG00000234028	AC062029.1		1.92719	2.93583e-66
ENSG00000162814	SPATA17	spermatogenesis associated 17	1.53917	2.1348e-29
ENSG00000238260	RP11-46F15.2		1.80119	8.5409e-26
ENSG00000092820	EZR	ezrin	1.10906	1.77833e-150
ENSG00000139988	RDH12	retinol dehydrogenase 12 (all-trans/9-cis/11-cis)	1.20025	0.0320921
ENSG00000112936	C7	complement component 7	1.65198	0.0350143
ENSG00000186446	ZNF501	zinc finger protein 501	2.8411	1.61282e-64
ENSG00000168505	GBX2	gastrulation brain homeobox 2	1.88913	1.12863e-26
ENSG00000187720	THSD4	thrombospondin, type I, domain containing 4	1.12576	0.0392299
ENSG00000182308	DCAF4L1	DDB1 and CUL4 associated factor 4-like 1	1.47618	6.86314e-13
ENSG00000213967	ZNF726	zinc finger protein 726	1.31028	4.40302e-14
ENSG00000149591	TAGLN	transgelin	2.02704	3.46181e-89
ENSG00000262251	RP11-199F11.2		2.52146	7.5644e-67
ENSG00000018869	ZNF582	zinc finger protein 582	2.97809	3.08537e-64
ENSG00000196357	ZNF565	zinc finger protein 565	1.42968	1.72964e-22
ENSG00000240859	AC093627.10		1.73172	0.041842
ENSG00000236671	RP11-573I11.2		3.17232	1.94506e-12
ENSG00000170260	ZNF212	zinc finger protein 212	1.02901	1.17457e-45
ENSG00000260757	RP11-120K18.2		1.71601	1.44442e-23
ENSG00000134548	C12orf39	chromosome 12 open reading frame 39	1.3654	0.0193891
ENSG00000126603	GLIS2	GLIS family zinc finger 2	1.23581	3.148e-36
ENSG00000173120	KDM2A	lysine (K)-specific demethylase 2A	1.11795	5.34301e-239
ENSG00000205670	FAM165B	family with sequence similarity 165, member B	1.44316	6.80962e-125
ENSG00000258521	RP11-638I2.9		1.57473	0.00207882
ENSG00000228340	RP5-1043L13.1		1.28554	1.52351e-10
ENSG00000138172	CALHM2	calcium homeostasis modulator 2	2.53611	1.47161e-122
ENSG00000131781	FMO5	flavin containing monooxygenase 5	1.04962	2.5045e-09
ENSG00000198517	MAFK	v-maf musculoaponeurotic fibrosarcoma oncogene homolog K (avian)	1.44634	2.15866e-55
ENSG00000167565	SERTAD3	SERTA domain containing 3	1.07003	6.89086e-32
ENSG00000185015	CA13	carbonic anhydrase XIII	1.33535	6.158e-06
ENSG00000134070	IRAK2	interleukin-1 receptor-associated kinase 2	1.54881	6.30125e-05
ENSG00000182168	UNC5C	unc-5 homolog C (C. elegans)	3.15584	2.5203e-22
ENSG00000138161	CUZD1	CUB and zona pellucida-like domains 1	1.45042	1.93159e-15
ENSG00000228966	AB019438.63		1.04857	1.47805e-05
ENSG00000173334	TRIB1	tribbles homolog 1 (Drosophila)	1.1272	2.43342e-66
ENSG00000253771	TPTE2P1	transmembrane phosphoinositide 3-phosphatase and tensin homolog 2 pseudogene 1	1.0952	0.00295292
ENSG00000254615	RP11-395G23.3		2.37319	2.8239e-59
ENSG00000248433	AL583842.7		2.22209	9.42413e-09
ENSG00000105971	CAV2	caveolin 2	1.05032	3.25747e-92
ENSG00000230992	FAM201B	family with sequence similarity 201, member B	1.76152	2.8408e-24
ENSG00000105278	ZFR2	zinc finger RNA binding protein 2	3.32067	9.06985e-19
ENSG00000205085	FAM71F2	family with sequence similarity 71, member F2	1.91207	5.29176e-23
ENSG00000210077	J01415.3		1.1527	1.27448e-17
ENSG00000100311	PDGFB	platelet-derived growth factor beta polypeptide	4.53107	7.00532e-183
ENSG00000197632	SERPINB2	serpin peptidase inhibitor, clade B (ovalbumin), member 2	4.43564	2.76078e-210
ENSG00000260896	RP11-314O13.1		3.02704	4.12589e-87
ENSG00000166704	ZNF606	zinc finger protein 606	1.00738	2.46845e-29
ENSG00000161021	MAML1	mastermind-like 1 (Drosophila)	1.02169	1.03371e-122
ENSG00000258472	RP11-192H23.4	Uncharacterized protein	1.79791	4.64087e-111
ENSG00000170417	TMEM182	transmembrane protein 182	1.45716	1.53712e-81
ENSG00000171483	SSX6	synovial sarcoma, X breakpoint 6 (pseudogene)	1.69405	1.28324e-14
ENSG00000116990	MYCL1	v-myc myelocytomatosis viral oncogene homolog 1, lung carcinoma derived (avian)	1.28325	4.82031e-42
ENSG00000260432	RP11-297M9.2		1.94746	0.0194828
ENSG00000203706	SERTAD4-AS1	SERTAD4 antisense RNA 1	1.87948	5.32502e-26
ENSG00000261505	LA16c-358B7.3		1.86497	1.53913e-103
ENSG00000116455	WDR77	WD repeat domain 77	1.34816	1.45389e-133
ENSG00000197961	ZNF121	zinc finger protein 121	1.49206	4.77476e-96
ENSG00000159588	CCDC17	coiled-coil domain containing 17	1.98288	2.38156e-59
ENSG00000251164	HULC	highly up-regulated in liver cancer (non-protein coding)	2.17247	3.37935e-28
ENSG00000258405	ZNF578	zinc finger protein 578	3.65028	1.94956e-30
ENSG00000163291	PAQR3	progestin and adipoQ receptor family member III	1.07686	3.26602e-57
ENSG00000182352	C17orf77	chromosome 17 open reading frame 77	1.03279	2.83862e-08
ENSG00000243701	RP11-446H18.3		4.30881	0
ENSG00000267254	CTD-2162K18.5		4.24023	1.03717e-160
ENSG00000130766	SESN2	sestrin 2	1.10885	2.6186e-13
ENSG00000242622	RP11-18H7.1		2.54284	1.28298e-123
ENSG00000162390	ACOT11	acyl-CoA thioesterase 11	1.35565	9.80448e-25
ENSG00000052749	RRP12	ribosomal RNA processing 12 homolog (S. cerevisiae)	1.24597	1.04007e-68
ENSG00000226180	AC010536.2	Uncharacterized protein; cDNA FLJ45526 fis, clone BRTHA2027227	1.04173	6.7535e-14
ENSG00000240747	KRBOX1	KRAB box domain containing 1	3.46605	9.66538e-100
ENSG00000240449	RP4-584D14.5		1.77244	2.75829e-07
ENSG00000133985	TTC9	tetratricopeptide repeat domain 9	2.59185	6.42274e-07
ENSG00000249641	HOXC-AS5	HOXC cluster antisense RNA 5	1.56631	0.0210031
ENSG00000107249	GLIS3	GLIS family zinc finger 3	1.69846	0.000705495
ENSG00000204344	STK19	serine/threonine kinase 19	1.07739	2.92516e-36
ENSG00000228175	GEMIN8P4	gem (nuclear organelle) associated protein 8 pseudogene 4	1.48603	5.12396e-33
ENSG00000163734	CXCL3	chemokine (C-X-C motif) ligand 3	2.76332	1.42702e-24
ENSG00000159479	MED8	mediator complex subunit 8	1.05433	3.38465e-130
ENSG00000253671	RP11-806O11.1		2.48882	6.36552e-35
ENSG00000197599	CCDC154	coiled-coil domain containing 154	1.87683	4.55854e-60
ENSG00000149196	C11orf73	chromosome 11 open reading frame 73	1.02205	1.41984e-89
ENSG00000232019	AC074183.4		1.28515	1.96933e-14
ENSG00000178537	SLC25A20	solute carrier family 25 (carnitine/acylcarnitine translocase), member 20	1.29555	8.41137e-50
ENSG00000241714	RP11-76P2.2		1.14803	9.1144e-13
ENSG00000106089	STX1A	syntaxin 1A (brain)	1.2556	4.59305e-48
ENSG00000100403	ZC3H7B	zinc finger CCCH-type containing 7B	1.20429	1.47672e-43
ENSG00000172575	RASGRP1	RAS guanyl releasing protein 1 (calcium and DAG-regulated)	2.39249	2.73611e-51
ENSG00000167985	SDHAF2	succinate dehydrogenase complex assembly factor 2	1.4299	1.84147e-108
ENSG00000151917	BEND6	BEN domain containing 6	1.66833	4.41066e-06
ENSG00000258102	RP11-809C9.2		1.91623	3.85361e-22
ENSG00000260978	RP11-73C9.1		1.82122	2.15279e-15
ENSG00000210049	J01415.2		1.99946	2.74157e-71
ENSG00000235560	AC002310.12		1.48633	2.98009e-29
ENSG00000085415	SEH1L	SEH1-like (S. cerevisiae)	1.23609	3.88315e-165
ENSG00000213077	FAM106A	family with sequence similarity 106, member A	1.9302	7.38791e-08
ENSG00000215417	MIR17HG	miR-17-92 cluster host gene (non-protein coding)	1.79612	1.61373e-58
ENSG00000171234	UGT2B7	UDP glucuronosyltransferase 2 family, polypeptide B7	1.10881	1.5833e-07
ENSG00000198028	ZNF560	zinc finger protein 560	3.9843	3.54463e-159
ENSG00000172969	FRG2C	FSHD region gene 2 family, member C	1.87049	2.97907e-28
ENSG00000238243	OR2W3	olfactory receptor, family 2, subfamily W, member 3	3.1341	2.32245e-05
ENSG00000103449	SALL1	sal-like 1 (Drosophila)	1.64045	0.0314371
ENSG00000106025	TSPAN12	tetraspanin 12	2.20954	1.15918e-56
ENSG00000197054	ZNF763	zinc finger protein 763	2.74192	0.000366154
ENSG00000105771	SMG9	smg-9 homolog, nonsense mediated mRNA decay factor (C. elegans)	1.18408	1.14606e-53
ENSG00000014914	MTMR11	myotubularin related protein 11	3.17619	6.12599e-110
ENSG00000119737	GPR75	G protein-coupled receptor 75	1.04898	8.40818e-09
ENSG00000143127	ITGA10	integrin, alpha 10	2.49191	4.54627e-30
ENSG00000238151	MLLT10P1	myeloid/lymphoid or mixed-lineage leukemia (trithorax homolog, Drosophila); translocated to, 10 pseudogene 1	1.51991	1.5622e-13
ENSG00000196843	ARID5A	AT rich interactive domain 5A (MRF1-like)	1.07148	1.30764e-14
ENSG00000141837	CACNA1A	calcium channel, voltage-dependent, P/Q type, alpha 1A subunit	1.1509	2.06795e-14
ENSG00000124613	ZNF391	zinc finger protein 391	1.24989	1.56821e-23
ENSG00000232022	RP5-1109J22.1		1.67041	0.00440995
ENSG00000123119	NECAB1	N-terminal EF-hand calcium binding protein 1	1.53237	4.02122e-27
ENSG00000124713	GNMT	glycine N-methyltransferase	1.35526	2.19214e-20
ENSG00000104043	ATP8B4	ATPase, class I, type 8B, member 4	1.34555	4.71305e-06
ENSG00000261360	CTD-2165H16.4		2.0213	6.73055e-34
ENSG00000078487	ZCWPW1	zinc finger, CW type with PWWP domain 1	2.06929	1.91079e-22
ENSG00000153574	RPIA	ribose 5-phosphate isomerase A	1.92527	0
ENSG00000183323	CCDC125	coiled-coil domain containing 125	1.87383	1.13609e-110
ENSG00000168826	ZBTB49	zinc finger and BTB domain containing 49	1.03924	6.68583e-31
ENSG00000232775	AP000525.10		2.56132	1.76689e-41
ENSG00000197083	ZNF300P1	zinc finger protein 300 pseudogene 1	3.68785	8.68721e-97
ENSG00000170927	PKHD1	polycystic kidney and hepatic disease 1 (autosomal recessive)	1.0689	7.19162e-08
ENSG00000142065	ZFP14	zinc finger protein 14 homolog (mouse)	1.42537	3.0155e-23
ENSG00000257636	RP11-1103G16.1		2.03379	2.23895e-20
ENSG00000149596	JPH2	junctophilin 2	3.43652	2.28399e-13
ENSG00000226088	RP11-180O5.2		2.22427	2.20532e-27
ENSG00000164756	SLC30A8	solute carrier family 30 (zinc transporter), member 8	1.37963	1.91656e-12
ENSG00000135605	TEC	tec protein tyrosine kinase	1.82714	1.95778e-31
ENSG00000233207	RP11-216M21.7		1.28898	8.75433e-10
ENSG00000197647	ZNF433	zinc finger protein 433	1.99841	2.22359e-59
ENSG00000267547	RP11-686D22.4		1.77855	0.0356955
ENSG00000189229	AC069277.2		1.08145	2.94006e-06
ENSG00000250959	GLUD1P3	glutamate dehydrogenase 1 pseudogene 3	1.14238	2.38086e-23
ENSG00000171124	FUT3	fucosyltransferase 3 (galactoside 3(4)-L-fucosyltransferase, Lewis blood group)	1.06117	2.60953e-06
ENSG00000141985	SH3GL1	SH3-domain GRB2-like 1	2.13277	3.03972e-212
ENSG00000080573	COL5A3	collagen, type V, alpha 3	1.16094	3.04611e-14
ENSG00000163376	KBTBD8	kelch repeat and BTB (POZ) domain containing 8	1.90291	7.37302e-100
ENSG00000076984	MAP2K7	mitogen-activated protein kinase kinase 7	1.03478	5.29947e-99
ENSG00000205277	MUC12	mucin 12, cell surface associated	3.44438	3.97319e-08
ENSG00000161509	GRIN2C	glutamate receptor, ionotropic, N-methyl D-aspartate 2C	2.16202	4.59979e-69
ENSG00000169403	PTAFR	platelet-activating factor receptor	1.75152	4.44085e-21
ENSG00000173041	ZNF680	zinc finger protein 680	1.20274	2.02669e-29
ENSG00000135407	AVIL	advillin	1.77551	6.05332e-17
ENSG00000263072	RP11-473M20.14		1.0497	1.38928e-46
ENSG00000165583	SSX5	synovial sarcoma, X breakpoint 5	3.87276	2.10497e-11
ENSG00000238261	BX004987.5		1.37134	4.16002e-51
ENSG00000231742	RP11-112L6.4		2.29302	2.30037e-41
ENSG00000116741	RGS2	regulator of G-protein signaling 2, 24kDa	1.24781	7.53452e-55
ENSG00000010030	ETV7	ets variant 7	2.61777	0.000216509
ENSG00000135898	GPR55	G protein-coupled receptor 55	1.53821	6.04158e-17
ENSG00000186174	BCL9L	B-cell CLL/lymphoma 9-like	1.69729	1.37312e-37
ENSG00000066032	CTNNA2	catenin (cadherin-associated protein), alpha 2	1.52433	3.03762e-25
ENSG00000170049	KCNAB3	potassium voltage-gated channel, shaker-related subfamily, beta member 3	3.16904	3.05672e-277
ENSG00000244291	C7orf13	chromosome 7 open reading frame 13	3.63804	1.63786e-48
ENSG00000120729	MYOT	myotilin	1.05687	5.67825e-07
ENSG00000196466	ZNF799	zinc finger protein 799	3.71489	1.76672e-125
ENSG00000125266	EFNB2	ephrin-B2	1.1096	8.16453e-16
ENSG00000081479	LRP2	low density lipoprotein receptor-related protein 2	1.62152	7.99257e-11
ENSG00000256229	ZNF486	zinc finger protein 486	1.54839	0.00056964
ENSG00000170689	HOXB9	homeobox B9	1.64613	1.09482e-79
ENSG00000247400	DNAJC3-AS1	DNAJC3 antisense RNA 1	2.99483	8.53982e-208
ENSG00000225434	RP11-63P12.6		1.51658	1.98693e-14
ENSG00000205930	C21orf49	chromosome 21 open reading frame 49	2.0728	2.74782e-29
ENSG00000132881	RSG1	REM2 and RAB-like small GTPase 1	1.10772	1.16392e-20
ENSG00000234883	MIR155HG	MIR155 host gene (non-protein coding)	2.34271	0.000353237
ENSG00000170161	RP11-262H14.4		1.17797	0.00366479
ENSG00000198342	ZNF442	zinc finger protein 442	5.06491	2.70942e-32
ENSG00000258733	CTD-2341M24.1		2.27379	1.64519e-18
ENSG00000179523	RP11-151N17.2		1.24066	2.42267e-47
ENSG00000260236	RP11-708J19.1		1.25794	1.63034e-17
ENSG00000237356	AL163953.3		1.55794	0.00728057
ENSG00000249087	C1orf213	chromosome 1 open reading frame 213	1.3624	8.35846e-34
ENSG00000260209	RP11-680F20.10		1.13828	2.84232e-05
ENSG00000120211	INSL4	insulin-like 4 (placenta)	2.82564	7.42689e-05
ENSG00000163138	PACRGL	PARK2 co-regulated-like	1.02809	6.47568e-33
ENSG00000233006	AC034220.3		2.97064	1.13726e-52
ENSG00000180422	LINC00304	long intergenic non-protein coding RNA 304	1.12547	7.84078e-09
ENSG00000232769	AL138968.1	Uncharacterized protein	1.66907	2.1341e-09
ENSG00000163661	PTX3	pentraxin 3, long	1.54417	1.45192e-20
ENSG00000109065	NAT9	N-acetyltransferase 9 (GCN5-related, putative)	1.63363	4.20561e-114
ENSG00000255237	RP13-317D12.3		1.08876	1.46427e-06
ENSG00000178301	AQP11	aquaporin 11	1.2958	7.65479e-24
ENSG00000100558	PLEK2	pleckstrin 2	1.66277	0.000366472
ENSG00000182583	VCX	variable charge, X-linked	3.46182	1.03229e-71
ENSG00000143429	AC027612.6		2.26669	7.55971e-187
ENSG00000176593	CTD-2368P22.1	HCG1811579; Uncharacterized protein	2.18689	2.40435e-154
ENSG00000224358	RP11-466F5.8		2.31574	4.73322e-45
ENSG00000234665	RP11-262H14.3		1.9527	0.0190977
ENSG00000265683	RP11-173M1.5		1.12043	9.07016e-07
ENSG00000249459	ZNF286B	zinc finger protein 286B	1.13949	1.1107e-06
ENSG00000260751	CTD-2196E14.6		2.02831	3.44838e-74
ENSG00000196110	ZNF699	zinc finger protein 699	1.60524	8.65552e-44
ENSG00000242866	STRC	stereocilin	2.07335	3.52562e-33
ENSG00000180353	HCLS1	hematopoietic cell-specific Lyn substrate 1	1.29186	1.66015e-09
ENSG00000231663	RP5-827C21.4		1.45862	1.47056e-18
ENSG00000228106	RP11-452F19.3		1.47631	3.5648e-47
ENSG00000198225	FKBP1C	FK506 binding protein 1C	1.06378	2.52105e-05
ENSG00000121413	ZSCAN18	zinc finger and SCAN domain containing 18	1.14901	1.0649e-18
ENSG00000224689	ZNF812	zinc finger protein 812	4.31008	1.04789e-116
ENSG00000100314	CABP7	calcium binding protein 7	1.31336	2.68417e-11
ENSG00000167772	ANGPTL4	angiopoietin-like 4	1.74634	0.00373807
ENSG00000176386	CDC26	cell division cycle 26 homolog (S. cerevisiae)	1.24084	4.96719e-38
ENSG00000205181	LINC00654	long intergenic non-protein coding RNA 654	1.18667	0.000118306
ENSG00000154928	EPHB1	EPH receptor B1	2.20448	0.000220303
ENSG00000101096	NFATC2	nuclear factor of activated T-cells, cytoplasmic, calcineurin-dependent 2	2.42618	4.04359e-23
ENSG00000267648	RP11-686D22.3		1.93216	0.0206416
ENSG00000186204	CYP4F12	cytochrome P450, family 4, subfamily F, polypeptide 12	2.00192	5.55907e-18
ENSG00000207650	MIR570	microRNA 570	1.29832	6.16942e-13
ENSG00000226251	RP11-15I11.3		1.66849	0.000391636
ENSG00000232233	RP11-573D15.2		1.50752	1.11654e-27
ENSG00000260339	HEXA-AS1	HEXA antisense RNA 1	1.16625	6.13781e-05
ENSG00000171224	C10orf35	chromosome 10 open reading frame 35	1.88002	3.72646e-63
ENSG00000231982	RP11-573D15.1		1.02559	9.75477e-08
ENSG00000248429	RP11-597D13.9		1.89786	7.45621e-18
ENSG00000067715	SYT1	synaptotagmin I	2.03087	3.53809e-05
ENSG00000165449	SLC16A9	solute carrier family 16, member 9 (monocarboxylic acid transporter 9)	4.22363	3.50542e-10
ENSG00000205090	TMEM240	transmembrane protein 240	1.29864	1.24024e-14
ENSG00000253569	VENTXP5	VENT homeobox pseudogene 5	1.57964	6.74166e-08
ENSG00000203772	SPRN	shadow of prion protein homolog (zebrafish)	1.61279	1.71754e-85
ENSG00000102804	TSC22D1	TSC22 domain family, member 1	1.0011	3.09453e-145
ENSG00000188833	ENTPD8	ectonucleoside triphosphate diphosphohydrolase 8	1.1008	6.78821e-09
ENSG00000265399	RP13-270P17.2		1.4709	4.76934e-23
ENSG00000091106	NLRC4	NLR family, CARD domain containing 4	2.68956	3.66254e-61
ENSG00000236163	RP11-501I18.2		1.3504	1.97612e-17
ENSG00000220201	ZGLP1	zinc finger, GATA-like protein 1	1.87003	1.67156e-22
ENSG00000189056	RELN	reelin	2.38165	1.19953e-05
ENSG00000261254	RP4-714D9.5		1.74671	2.24629e-29
ENSG00000200087	SNORA73B	small nucleolar RNA, H/ACA box 73B	2.66159	3.24641e-64
ENSG00000166492	FAM86GP	family with sequence similarity 86, member G, pseudogene	1.56563	7.10653e-16
ENSG00000229130	RP11-76P2.3		1.45437	1.02409e-17
ENSG00000226711	FAM66C	family with sequence similarity 66, member C	1.6534	0.000598066
ENSG00000236015	AC011290.5		1.19584	4.21244e-19
ENSG00000118946	PCDH17	protocadherin 17	1.90221	2.52098e-24
ENSG00000236499	AC007663.1	Em:AC006547.7 protein; HCG2001938; Uncharacterized protein	2.42029	2.98845e-51
ENSG00000258992	TSPY1	testis specific protein, Y-linked 1	2.74236	7.20816e-31
ENSG00000100276	RASL10A	RAS-like, family 10, member A	1.98867	8.15884e-23
ENSG00000115423	DNAH6	dynein, axonemal, heavy chain 6	2.80839	7.40565e-66
ENSG00000204147	ASAH2B	N-acylsphingosine amidohydrolase (non-lysosomal ceramidase) 2B	1.60356	3.48063e-22
ENSG00000197769	MAP1LC3C	microtubule-associated protein 1 light chain 3 gamma	3.15809	1.90177e-08
ENSG00000138382	METTL5	methyltransferase like 5	1.44658	1.62911e-51
ENSG00000213225	AC018804.7		1.75819	1.37314e-25
ENSG00000239467	AC007405.6		1.40435	4.07578e-24
ENSG00000108821	COL1A1	collagen, type I, alpha 1	2.14522	1.4613e-32
ENSG00000249550	RP11-438N16.1		3.60319	3.14555e-148
ENSG00000148204	CRB2	crumbs homolog 2 (Drosophila)	3.26128	1.23918e-49
ENSG00000138795	LEF1	lymphoid enhancer-binding factor 1	1.37694	1.147e-103
ENSG00000260394	LA16c-313D11.9		1.21879	2.1228e-13
ENSG00000184735	DDX53	DEAD (Asp-Glu-Ala-Asp) box polypeptide 53	2.91688	2.34124e-42
ENSG00000128000	ZNF780B	zinc finger protein 780B	2.12005	0
ENSG00000236719	RP11-522D2.1		3.1733	9.50167e-305
ENSG00000143110	C1orf162	chromosome 1 open reading frame 162	1.49429	5.0835e-18
ENSG00000188211	NCR3LG1	natural killer cell cytotoxicity receptor 3 ligand 1	1.28103	3.82345e-20
ENSG00000115009	CCL20	chemokine (C-C motif) ligand 20	2.32845	4.43351e-25
ENSG00000188629	ZNF177	zinc finger protein 177	4.98865	9.18817e-227
ENSG00000130311	DDA1	DET1 and DDB1 associated 1	2.09232	1.06677e-281
ENSG00000178809	TRIM73	tripartite motif containing 73	1.22899	1.49643e-28
ENSG00000153989	NUS1	nuclear undecaprenyl pyrophosphate synthase 1 homolog (S. cerevisiae)	1.02488	5.29603e-108
ENSG00000160124	CCDC58	coiled-coil domain containing 58	1.16019	4.73449e-138
ENSG00000227693	GSTM3P1	glutathione S-transferase mu 3 pseudogene 1	1.24107	2.8522e-19
ENSG00000240280	TCAM1P	testicular cell adhesion molecule 1 homolog (mouse), pseudogene	1.62103	2.76218e-16
ENSG00000115252	PDE1A	phosphodiesterase 1A, calmodulin-dependent	2.06752	0.0120617
ENSG00000105722	ERF	Ets2 repressor factor	1.0725	7.14141e-75
ENSG00000213799	ZNF845	zinc finger protein 845	1.0151	4.57726e-38
ENSG00000179071	CCDC89	coiled-coil domain containing 89	1.09853	4.81979e-05
ENSG00000197372	ZNF675	zinc finger protein 675	1.37395	1.50102e-40
ENSG00000147082	CCNB3	cyclin B3	1.94307	1.99654e-11
ENSG00000254427	RP11-430H10.1		2.91207	4.18615e-46
ENSG00000205704	LINC00634	long intergenic non-protein coding RNA 634	1.13038	9.07552e-07
ENSG00000237440	ZNF737	zinc finger protein 737	1.79368	9.85536e-26
ENSG00000198796	ALPK2	alpha-kinase 2	1.62891	4.12746e-10
ENSG00000147166	ITGB1BP2	integrin beta 1 binding protein (melusin) 2	1.78437	1.8629e-29
ENSG00000262333	RP5-1037N22.3		1.48921	1.79434e-23
ENSG00000223346	RP11-348I14.4		1.86972	1.14075e-36
ENSG00000258673	RP4-773N10.6		1.2043	2.08659e-05
ENSG00000203288	RP11-98D18.9		1.37545	6.65382e-10
ENSG00000198518	HIST1H4E	histone cluster 1, H4e	1.16991	2.00582e-10
ENSG00000111341	MGP	matrix Gla protein	1.1228	4.55661e-05
ENSG00000171160	MORN4	MORN repeat containing 4	1.04014	1.12565e-55
ENSG00000173175	ADCY5	adenylate cyclase 5	1.5755	1.15598e-23
ENSG00000128242	GAL3ST1	galactose-3-O-sulfotransferase 1	1.32785	0.00224376
ENSG00000188888	GPR179	G protein-coupled receptor 179	2.35996	4.18462e-24
ENSG00000128536	CDHR3	cadherin-related family member 3	2.48542	0
ENSG00000228033	AC010967.2		2.82597	6.7743e-05
ENSG00000188383	AC018892.9		1.8688	8.14737e-21
ENSG00000124334	IL9R	interleukin 9 receptor	1.12998	1.05955e-08
ENSG00000259715	CTD-3110H11.1		1.0437	7.53302e-09
ENSG00000128805	ARHGAP22	Rho GTPase activating protein 22	1.4574	3.76946e-18
ENSG00000266172	RP11-1109M24.11		1.78733	1.17476e-09
ENSG00000135245	HILPDA	hypoxia inducible lipid droplet-associated	1.22236	3.06704e-98
ENSG00000237849	NFYAP1	nuclear transcription factor Y, alpha pseudogene 1	1.63107	2.12628e-08
ENSG00000246090	RP11-696N14.1		2.00385	1.09552e-17
ENSG00000235092	AC011747.7		2.22659	2.29089e-08
ENSG00000122026	RPL21	ribosomal protein L21	1.18869	6.57682e-52
ENSG00000259826	RP11-467D6.1		1.35308	4.54358e-14
ENSG00000257596	RP11-968A15.2		2.28246	5.90431e-32
ENSG00000236453	AC003092.1		1.97234	1.18717e-08
ENSG00000180479	ZNF571	zinc finger protein 571	2.49454	2.00533e-70
ENSG00000206573	RP11-58B17.1		2.00675	0
ENSG00000237527	AF241725.6		2.99699	6.93496e-05
ENSG00000236829	Z97634.5		1.12016	1.36866e-10
ENSG00000078967	UBE2D4	ubiquitin-conjugating enzyme E2D 4 (putative)	1.90975	1.7472e-168
ENSG00000137699	TRIM29	tripartite motif containing 29	2.07151	0.00524212
ENSG00000259712	CTD-2184D3.5		1.09856	8.31207e-05
ENSG00000230006	ANKRD36BP2	ankyrin repeat domain 36B pseudogene 2	1.00139	4.56493e-09
ENSG00000179859	AC025335.1		2.3028	1.74117e-71
ENSG00000117148	ACTL8	actin-like 8	4.03801	3.95402e-77
ENSG00000162645	GBP2	guanylate binding protein 2, interferon-inducible	3.13411	3.57475e-54
ENSG00000227821	AL392086.1		1.30362	3.74031e-05
ENSG00000153666	GOLGA8IP	golgin A8 family, member I, pseudogene	1.43268	9.59525e-27
ENSG00000174171	RP11-23P13.6		2.21981	1.65224e-05
ENSG00000232216	IGHV3-43	immunoglobulin heavy variable 3-43	1.21811	3.13539e-05
ENSG00000261094	RP11-355O1.11		1.92216	4.07417e-65
ENSG00000236943	AL592284.1		1.59263	1.13797e-08
ENSG00000237059	AC083863.7		1.03266	3.72854e-07
ENSG00000114757	PEX5L	peroxisomal biogenesis factor 5-like	1.04568	6.63973e-06
ENSG00000149781	FERMT3	fermitin family member 3	1.71911	1.74441e-19
ENSG00000166126	AMN	amnionless homolog (mouse)	3.09789	1.4858e-43
ENSG00000140284	SLC27A2	solute carrier family 27 (fatty acid transporter), member 2	4.21575	1.24981e-11
ENSG00000231464	AC024937.4		1.45263	8.04417e-09
ENSG00000213023	SYT3	synaptotagmin III	2.52403	0.00132328
ENSG00000226329	AC005682.6		3.24647	4.89045e-108
ENSG00000244184	RP11-314A20.2		1.68313	3.76726e-14
ENSG00000043591	ADRB1	adrenoceptor beta 1	1.29411	0.000564968
ENSG00000119715	ESRRB	estrogen-related receptor beta	1.29916	0.000110474
ENSG00000113578	FGF1	fibroblast growth factor 1 (acidic)	2.53239	1.3358e-32
ENSG00000267352	SH3GL1P3	SH3-domain GRB2-like 1 pseudogene 3	1.69348	2.53135e-18
ENSG00000240682	ISY1	ISY1 splicing factor homolog (S. cerevisiae)	1.15279	1.92898e-106
ENSG00000121931	LRIF1	ligand dependent nuclear receptor interacting factor 1	1.40574	6.86299e-188
ENSG00000226913	BSN-AS2	BSN antisense RNA 2	1.09085	1.8044e-07
ENSG00000100490	CDKL1	cyclin-dependent kinase-like 1 (CDC2-related kinase)	1.08671	1.97357e-08
ENSG00000164251	F2RL1	coagulation factor II (thrombin) receptor-like 1	1.23535	4.46722e-06
ENSG00000187726	DNAJB13	DnaJ (Hsp40) homolog, subfamily B, member 13	1.07457	2.15866e-05
ENSG00000101298	SNPH	syntaphilin	2.0061	1.68539e-268
ENSG00000198033	TUBA3C	tubulin, alpha 3c	5.25154	6.01567e-115
ENSG00000240291	RP11-499P20.2		1.8724	3.5899e-33
ENSG00000221923	ZNF880	zinc finger protein 880	2.0867	9.31509e-129
ENSG00000119900	OGFRL1	opioid growth factor receptor-like 1	1.77087	3.98982e-100
ENSG00000258927	RP11-1070N10.5		4.7083	1.27448e-100
ENSG00000105509	HAS1	hyaluronan synthase 1	1.52047	4.7964e-05
ENSG00000140675	SLC5A2	solute carrier family 5 (sodium/glucose cotransporter), member 2	3.51133	1.71001e-83
ENSG00000198883	PNMA5	paraneoplastic Ma antigen family member 5	1.07207	0.000770695
ENSG00000246089	RP11-115C21.2		1.18492	3.8362e-27
ENSG00000103942	HOMER2	homer homolog 2 (Drosophila)	1.27145	4.57268e-22
ENSG00000233237	LINC00472	long intergenic non-protein coding RNA 472	2.48825	4.1048e-84
ENSG00000234610	LINC00624	long intergenic non-protein coding RNA 624	2.1273	1.34797e-17
ENSG00000188158	NHS	Nance-Horan syndrome (congenital cataracts and dental anomalies)	2.21391	1.06114e-06
ENSG00000170412	GPRC5C	G protein-coupled receptor, family C, group 5, member C	1.09751	0.000627787
ENSG00000073282	TP63	tumor protein p63	2.29224	9.08038e-06
ENSG00000235272	FAM103A2P	family with sequence similarity 103, member A2 pseudogene	1.07068	4.96306e-05
ENSG00000227706	AL713998.1	Uncharacterized protein	3.79102	3.74535e-44
ENSG00000101203	COL20A1	collagen, type XX, alpha 1	4.21098	6.65403e-265
ENSG00000248498	ASNSP1	asparagine synthetase pseudogene 1	1.5516	4.46266e-06
ENSG00000230454	U73166.2		1.47271	4.88883e-18
ENSG00000144648	CCBP2	chemokine binding protein 2	1.85169	7.71299e-27
ENSG00000110660	SLC35F2	solute carrier family 35, member F2	1.45299	7.17267e-80
ENSG00000261485	PAN3-AS1	PAN3 antisense RNA 1	1.6621	1.05057e-30
ENSG00000261286	RP11-517C16.2		1.04097	3.92373e-05
ENSG00000184363	PKP3	plakophilin 3	1.70813	0.0200427
ENSG00000140993	TIGD7	tigger transposable element derived 7	2.30498	1.02413e-81
ENSG00000233337	RP11-552M11.2		1.18192	9.57453e-08
ENSG00000215386	LINC00478	long intergenic non-protein coding RNA 478	2.04791	8.08402e-21
ENSG00000229970	AC007128.1		1.08947	0.0012566
ENSG00000232109	AL022344.2		1.88862	1.07022e-11
ENSG00000164951	PDP1	pyruvate dehyrogenase phosphatase catalytic subunit 1	2.37694	0
ENSG00000232485	AC098820.3		1.63106	1.76643e-29
ENSG00000239389	PCDHA13	protocadherin alpha 13	2.86758	0.000163719
ENSG00000205611	RP4-610C12.4		1.12041	0.000105223
ENSG00000224892	RPS4XP16	ribosomal protein S4X pseudogene 16	1.18105	3.22341e-08
ENSG00000150275	PCDH15	protocadherin-related 15	1.82078	2.08237e-09
ENSG00000260464	RP4-561L24.3		1.16693	5.44335e-12
ENSG00000229816	DDX50P1	DEAD/H (Asp-Glu-Ala-Asp/His) box polypeptide 50 pseudogene 1	1.82525	1.46943e-25
ENSG00000245680	ZNF585B	zinc finger protein 585B	1.80763	1.7884e-39
ENSG00000129646	QRICH2	glutamine rich 2	1.16535	2.37017e-15
ENSG00000259888	CTD-2540M10.1		1.96065	2.53076e-13
ENSG00000168000	BSCL2	Berardinelli-Seip congenital lipodystrophy 2 (seipin)	1.06172	3.7631e-32
ENSG00000081052	COL4A4	collagen, type IV, alpha 4	2.74599	0.000132018
ENSG00000138653	NDST4	N-deacetylase/N-sulfotransferase (heparan glucosaminyl) 4	1.02797	0.00122546
ENSG00000205129	C4orf47	chromosome 4 open reading frame 47	1.16226	6.08132e-14
ENSG00000237115	RP1-131F15.2		1.99607	8.14737e-23
ENSG00000226332	RP11-157P1.4		1.10269	2.42267e-10
ENSG00000261490	RP11-448G15.3		2.39084	1.2718e-86
ENSG00000143727	ACP1	acid phosphatase 1, soluble	1.00388	0
ENSG00000163806	SPDYA	speedy homolog A (Xenopus laevis)	1.15821	2.32493e-08
ENSG00000102271	KLHL4	kelch-like 4 (Drosophila)	1.67579	0.0109813
ENSG00000172901	LVRN	Aminopeptidase Q	1.82575	3.6376e-10
ENSG00000226423	AC093642.4		1.45282	4.81606e-09
ENSG00000259349	RP11-15E18.1		1.81181	2.5134e-14
ENSG00000267519	CTD-3252C9.4		3.11012	3.19389e-132
ENSG00000175854	SWI5	SWI5 recombination repair homolog (yeast)	1.38216	1.18928e-128
ENSG00000088727	KIF9	kinesin family member 9	1.98081	3.42948e-150
ENSG00000092871	RFFL	ring finger and FYVE-like domain containing E3 ubiquitin protein ligase	1.31986	3.16464e-49
ENSG00000173157	ADAMTS20	ADAM metallopeptidase with thrombospondin type 1 motif, 20	1.29302	0.00121131
ENSG00000166762	CATSPER2	cation channel, sperm associated 2	1.5147	3.15235e-48
ENSG00000197038	RBMY1A3P	RNA binding motif protein, Y-linked, family 1, member A3 pseudogene	1.28925	0.000348315
ENSG00000214293	RSBN1L-AS1	RSBN1L antisense RNA 1	1.29714	4.57076e-81
ENSG00000126231	PROZ	protein Z, vitamin K-dependent plasma glycoprotein	1.00114	1.00639e-06
ENSG00000132669	RIN2	Ras and Rab interactor 2	1.91204	1.87278e-55
ENSG00000224046	AC005076.5		1.46252	4.12031e-18
ENSG00000130540	SULT4A1	sulfotransferase family 4A, member 1	2.04032	5.41082e-14
ENSG00000130176	CNN1	calponin 1, basic, smooth muscle	4.95091	1.1438e-117
ENSG00000267041	ZNF850	zinc finger protein 850	2.46573	3.3057e-85
ENSG00000267270	AC139100.2		1.00516	8.5355e-09
ENSG00000250038	RP11-180C1.1	Uncharacterized protein	2.80399	2.40382e-26
ENSG00000187260	WDR86	WD repeat domain 86	1.65781	4.26128e-09
ENSG00000143498	TAF1A	TATA box binding protein (TBP)-associated factor, RNA polymerase I, A, 48kDa	1.14789	4.23538e-61
ENSG00000105132	ZNF550	zinc finger protein 550	2.25284	4.90612e-69
ENSG00000084636	COL16A1	collagen, type XVI, alpha 1	1.47813	2.07421e-60
ENSG00000237424	FOXD2-AS1	FOXD2 antisense RNA 1	1.61594	4.45703e-75
ENSG00000121769	FABP3	fatty acid binding protein 3, muscle and heart (mammary-derived growth inhibitor)	1.28615	8.37701e-08
ENSG00000241563	CORT	cortistatin	1.49416	2.2205e-05
ENSG00000171448	ZBTB26	zinc finger and BTB domain containing 26	1.26981	4.64913e-110
ENSG00000165643	SOHLH1	spermatogenesis and oogenesis specific basic helix-loop-helix 1	1.86767	2.28489e-10
ENSG00000138395	CDK15	cyclin-dependent kinase 15	1.3517	1.63921e-27
ENSG00000233554	RP11-326F20.5		1.88755	0.00410278
ENSG00000148677	ANKRD1	ankyrin repeat domain 1 (cardiac muscle)	7.11764	0
ENSG00000197841	ZNF181	zinc finger protein 181	1.09213	2.77133e-30
ENSG00000250579	CTD-2297D10.2		1.28244	0.000425815
ENSG00000161570	CCL5	chemokine (C-C motif) ligand 5	3.14944	4.79464e-22
ENSG00000260585	RP13-192B19.2		1.58065	3.44152e-07
ENSG00000166250	CLMP	CXADR-like membrane protein	2.70012	4.88049e-34
ENSG00000228223	HCG11	HLA complex group 11 (non-protein coding)	1.36858	1.8427e-105
ENSG00000167767	KRT80	keratin 80	3.97092	2.64111e-28
ENSG00000171970	ZNF57	zinc finger protein 57	1.15181	7.52506e-30
ENSG00000261055	RP11-195M16.3		1.13696	0.000559467
ENSG00000182472	CAPN12	calpain 12	1.01812	0.0219915
ENSG00000135346	CGA	glycoprotein hormones, alpha polypeptide	1.97628	6.15045e-16
ENSG00000080854	IGSF9B	immunoglobulin superfamily, member 9B	2.22215	3.03548e-37
ENSG00000246548	RP11-7F17.5		1.07071	1.83646e-05
ENSG00000224418	STK24-AS1	STK24 antisense RNA 1	1.27188	3.47705e-06
ENSG00000237863	RP6-24A23.3		2.50678	0.00149447
ENSG00000243754	RP11-125K10.4		1.90189	3.1178e-16
ENSG00000214212	C19orf38	chromosome 19 open reading frame 38	1.6777	9.8355e-11
ENSG00000197181	PIWIL2	piwi-like 2 (Drosophila)	1.20366	5.1483e-08
ENSG00000105821	DNAJC2	DnaJ (Hsp40) homolog, subfamily C, member 2	1.34449	2.77247e-110
ENSG00000232151	RP11-277L2.2		1.89249	4.70232e-13
ENSG00000001561	ENPP4	ectonucleotide pyrophosphatase/phosphodiesterase 4 (putative)	2.25552	6.40655e-49
ENSG00000073536	NLE1	notchless homolog 1 (Drosophila)	1.49517	3.02188e-28
ENSG00000130544	ZNF557	zinc finger protein 557	1.048	2.45638e-37
ENSG00000253944	RP11-156K13.1		1.34101	0.00170684
ENSG00000139626	ITGB7	integrin, beta 7	2.17583	1.183e-32
ENSG00000265843	RP11-671C19.1		4.82755	4.91769e-78
ENSG00000229127	AC007038.7		1.31432	1.14982e-13
ENSG00000165899	OTOGL	otogelin-like	1.13941	0.000506874
ENSG00000102890	ELMO3	engulfment and cell motility 3	1.22744	1.68317e-20
ENSG00000246174	RP11-705O3.1		1.52595	1.5041e-75
ENSG00000176293	ZNF135	zinc finger protein 135	2.99418	1.66926e-57
ENSG00000241218	RP11-446H18.1		2.24894	1.32161e-18
ENSG00000187634	SAMD11	sterile alpha motif domain containing 11	3.43461	8.05081e-22
ENSG00000215354	FAM90A24P	family with sequence similarity 90, member A24, pseudogene	3.15053	4.29525e-23
ENSG00000132510	KDM6B	lysine (K)-specific demethylase 6B	1.64579	4.25662e-73
ENSG00000260495	RP11-55K13.1		1.56623	3.34806e-14
ENSG00000240476	CTD-2021J15.2		3.60083	4.10016e-237
ENSG00000072818	ACAP1	ArfGAP with coiled-coil, ankyrin repeat and PH domains 1	1.91888	1.45929e-29
ENSG00000136014	USP44	ubiquitin specific peptidase 44	1.69706	0.000309884
ENSG00000127528	KLF2	Kruppel-like factor 2 (lung)	1.56589	5.57139e-56
ENSG00000188738	FSIP2	fibrous sheath interacting protein 2	1.48062	2.89589e-39
ENSG00000248932	RP11-319G6.1		1.98018	3.50552e-33
ENSG00000241104	CEACAMP10	carcinoembryonic antigen-related cell adhesion molecule pseudogene 10	1.21366	1.44857e-09
ENSG00000188001	TPRG1	tumor protein p63 regulated 1	2.39556	2.55379e-22
ENSG00000256417	RP11-1038A11.3		1.37843	4.06594e-05
ENSG00000227896	RP11-77P6.2		1.27582	7.39954e-11
ENSG00000058091	CDK14	cyclin-dependent kinase 14	1.29545	5.11094e-19
ENSG00000183067	IGSF5	immunoglobulin superfamily, member 5	5.68426	4.38066e-27
ENSG00000139547	RDH16	retinol dehydrogenase 16 (all-trans)	1.57071	7.3582e-14
ENSG00000226852	RP1-212P9.2		1.68532	0.048403
ENSG00000235381	RP11-477D19.2		1.02173	1.25179e-12
ENSG00000106483	SFRP4	secreted frizzled-related protein 4	2.32569	0.00383951
ENSG00000205642	VCX3B	variable charge, X-linked 3B	2.35651	6.93301e-16
ENSG00000224660	AC087590.3		2.02718	4.73782e-212
ENSG00000109534	GAR1	GAR1 ribonucleoprotein homolog (yeast)	1.84476	0
ENSG00000226067	FAM91A2	family with sequence similarity 91, member A2	1.88178	6.26492e-12
ENSG00000165388	ZNF488	zinc finger protein 488	2.48532	0.000423734
ENSG00000166510	CCDC68	coiled-coil domain containing 68	2.01684	0.0148833
ENSG00000186312	CA5BP1	carbonic anhydrase VB pseudogene 1	1.67838	8.71592e-143
ENSG00000251532	CTD-2245E15.3		1.133	0.00170505
ENSG00000267640	CTD-2554C21.2		1.60936	2.33182e-05
ENSG00000111907	TPD52L1	tumor protein D52-like 1	1.12703	1.19718e-05
ENSG00000267283	AC005306.3		1.55433	3.18012e-20
ENSG00000227053	RP11-395B7.4		2.73832	4.40481e-05
ENSG00000144649	FAM198A	family with sequence similarity 198, member A	1.78472	5.38838e-11
ENSG00000198846	TOX	thymocyte selection-associated high mobility group box	3.12922	3.46717e-08
ENSG00000154721	JAM2	junctional adhesion molecule 2	2.05284	8.3315e-29
ENSG00000181007	ZFP82	zinc finger protein 82 homolog (mouse)	2.21587	2.13135e-69
ENSG00000170954	ZNF415	zinc finger protein 415	1.60205	0.0119994
ENSG00000251630	RP11-241F15.9		1.69669	0.0223961
ENSG00000223759	RP11-353N4.4		1.81229	9.12288e-05
ENSG00000171772	SYCE1	synaptonemal complex central element protein 1	2.67676	3.10895e-21
ENSG00000168495	POLR3D	polymerase (RNA) III (DNA directed) polypeptide D, 44kDa	1.51476	4.13176e-280
ENSG00000259424	RP11-35O15.1		1.75606	1.80988e-08
ENSG00000249645	RP11-552M14.1		2.05093	0.000187409
ENSG00000198339	HIST1H4I	histone cluster 1, H4i	1.41162	2.73731e-10
ENSG00000047365	ARAP2	ArfGAP with RhoGAP domain, ankyrin repeat and PH domain 2	1.10487	3.43506e-40
ENSG00000176746	MAGEB6	melanoma antigen family B, 6	5.92657	1.55617e-132
ENSG00000112658	SRF	serum response factor (c-fos serum response element-binding transcription factor)	1.2071	2.88981e-75
ENSG00000164669	INTS4L1	integrator complex subunit 4-like 1	1.61611	0.000951819
ENSG00000198912	C1orf174	chromosome 1 open reading frame 174	1.39454	1.62503e-74
ENSG00000166257	SCN3B	sodium channel, voltage-gated, type III, beta subunit	2.42086	1.49414e-09
ENSG00000232656	IDI2-AS1	IDI2 antisense RNA 1	1.14032	3.52097e-05
ENSG00000104059	FAM189A1	family with sequence similarity 189, member A1	1.5903	7.5123e-05
ENSG00000196152	ZNF79	zinc finger protein 79	2.03694	1.33208e-98
ENSG00000215845	TSTD1	thiosulfate sulfurtransferase (rhodanese)-like domain containing 1	2.09884	4.77091e-14
ENSG00000259081	RP11-488C13.6		1.55984	5.04076e-07
ENSG00000186020	ZNF529	zinc finger protein 529	2.11735	1.35014e-232
ENSG00000147394	ZNF185	zinc finger protein 185 (LIM domain)	1.5652	8.79849e-56
ENSG00000164850	GPER	G protein-coupled estrogen receptor 1	2.59192	1.42043e-30
ENSG00000181798	LINC00471	long intergenic non-protein coding RNA 471	1.53657	2.67632e-11
ENSG00000235621	LINC00494	long intergenic non-protein coding RNA 494	1.32727	9.3638e-05
ENSG00000171790	SLFNL1	schlafen-like 1	1.32468	1.09429e-17
ENSG00000233122	CTAGE7P	CTAGE family, member 7, pseudogene	1.72097	7.5799e-19
ENSG00000183840	GPR39	G protein-coupled receptor 39	4.27834	1.7039e-10
ENSG00000100453	GZMB	granzyme B (granzyme 2, cytotoxic T-lymphocyte-associated serine esterase 1)	1.21881	1.05582e-05
ENSG00000106080	FKBP14	FK506 binding protein 14, 22 kDa	1.34588	2.9224e-111
ENSG00000263884	RP11-705O1.8		1.51165	2.06691e-09
ENSG00000166707	ZCCHC18	zinc finger, CCHC domain containing 18	1.43391	4.453e-09
ENSG00000231704	AC004895.4		2.23698	2.03732e-13
ENSG00000248515	RP11-608O21.1		1.5967	1.93892e-06
ENSG00000241270	RP11-466F5.6		1.29012	0.0011901
ENSG00000125398	SOX9	SRY (sex determining region Y)-box 9	3.84792	4.72245e-14
ENSG00000187187	ZNF546	zinc finger protein 546	1.49725	5.3754e-28
ENSG00000261668	RP11-50D9.3		1.48626	0.00802205
ENSG00000229728	RP11-314N13.3		1.88553	2.70886e-17
ENSG00000173567	GPR113	G protein-coupled receptor 113	1.38743	5.29425e-09
ENSG00000134815	DHX34	DEAH (Asp-Glu-Ala-His) box polypeptide 34	1.26009	8.74784e-56
ENSG00000261351	CTD-3185P2.1		1.12512	3.16701e-10
ENSG00000225096	XXbac-BPG55C20.7		1.62802	2.03096e-06
ENSG00000159885	ZNF222	zinc finger protein 222	1.52012	8.1024e-37
ENSG00000254876	RP11-23J9.5		1.92731	1.6475e-08
ENSG00000167977	KCTD5	potassium channel tetramerisation domain containing 5	1.4671	3.19195e-193
ENSG00000203815	AL358813.2	Uncharacterized protein	2.17628	1.31084e-11
ENSG00000198798	MAGEB3	melanoma antigen family B, 3	2.37897	1.4025e-14
ENSG00000248690	HAS2-AS1	HAS2 antisense RNA 1	1.12893	3.93564e-05
ENSG00000078795	PKD2L2	polycystic kidney disease 2-like 2	1.04216	3.53787e-05
ENSG00000209482	SNORD83A	small nucleolar RNA, C/D box 83A	1.27526	4.26406e-12
ENSG00000234911	TEX21P	testis expressed 21, pseudogene	1.56076	1.18565e-05
ENSG00000133454	MYO18B	myosin XVIIIB	3.11534	6.32015e-27
ENSG00000260025	RP11-490M8.1		1.8526	0.0273915
ENSG00000213185	FAM24B	family with sequence similarity 24, member B	1.24859	2.46528e-07
ENSG00000260249	RP11-401P9.5		3.56265	5.8903e-42
ENSG00000180481	GLIPR1L2	GLI pathogenesis-related 1 like 2	1.2831	0.00660952
ENSG00000235961	PNMA6C	paraneoplastic Ma antigen family member 6C	2.10882	0.000252698
ENSG00000232995	RP11-267N12.3		1.37072	2.06486e-50
ENSG00000132297	HHLA1	HERV-H LTR-associating 1	1.17704	2.13624e-11
ENSG00000248794	CTD-2248H3.1		2.19596	3.4857e-09
ENSG00000164761	TNFRSF11B	tumor necrosis factor receptor superfamily, member 11b	4.04071	2.54669e-38
ENSG00000198440	ZNF583	zinc finger protein 583	1.90554	5.30156e-49
ENSG00000250072	CTC-529P8.1		4.20064	3.35557e-38
ENSG00000246859	STARD4-AS1	STARD4 antisense RNA 1	1.2201	4.41161e-09
ENSG00000236947	RP11-98G7.1		1.04982	0.000183793
ENSG00000196597	ZNF782	zinc finger protein 782	1.56013	2.60825e-45
ENSG00000151014	CCRN4L	CCR4 carbon catabolite repression 4-like (S. cerevisiae)	1.61049	1.58067e-190
ENSG00000232336	BX571672.3		2.00987	1.89219e-17
ENSG00000170324	FRMPD2	FERM and PDZ domain containing 2	2.96453	2.2137e-05
ENSG00000122644	ARL4A	ADP-ribosylation factor-like 4A	1.38957	3.44977e-171
ENSG00000239649	MYADML	myeloid-associated differentiation marker-like (pseudogene)	2.73479	3.75957e-20
ENSG00000250848	CTD-2083E4.5		2.41854	2.8619e-33
ENSG00000187984	ANKRD19P	ankyrin repeat domain 19, pseudogene	1.67038	8.9247e-17
ENSG00000238142	RP11-108M9.4		1.45942	0.000556576
ENSG00000134516	DOCK2	dedicator of cytokinesis 2	3.29929	9.29845e-09
ENSG00000124731	TREM1	triggering receptor expressed on myeloid cells 1	2.45983	3.66955e-13
ENSG00000062282	DGAT2	diacylglycerol O-acyltransferase 2	1.85071	2.86948e-20
ENSG00000073754	CD5L	CD5 molecule-like	1.8707	5.08941e-10
ENSG00000237436	RP11-312B8.1		1.70654	1.13181e-18
ENSG00000236424	TSPY10	testis specific protein, Y-linked 10	3.0694	5.35433e-26
ENSG00000118094	TREH	trehalase (brush-border membrane glycoprotein)	1.89954	4.44591e-11
ENSG00000254208	RP11-219B4.3		1.44817	1.27368e-05
ENSG00000145198	VWA5B2	von Willebrand factor A domain containing 5B2	1.97245	6.64585e-18
ENSG00000263126	CTC-479C5.10		1.60185	1.11702e-23
ENSG00000099338	CATSPERG	catsper channel auxiliary subunit gamma	1.34363	2.90186e-23
ENSG00000267183	AC010525.6		1.49161	2.29283e-12
ENSG00000136531	SCN2A	sodium channel, voltage-gated, type II, alpha subunit	2.14632	4.18529e-19
ENSG00000149633	KIAA1755	KIAA1755	3.7992	1.30822e-11
ENSG00000101605	MYOM1	myomesin 1, 185kDa	2.46004	2.56833e-50
ENSG00000258065	RP11-30H9.1		1.16276	0.00275835
ENSG00000197020	ZNF100	zinc finger protein 100	1.04212	8.2872e-30
ENSG00000251050	RP11-168A11.4		2.45883	1.84277e-25
ENSG00000196646	ZNF136	zinc finger protein 136	1.21483	5.64441e-54
ENSG00000167523	C16orf55	chromosome 16 open reading frame 55	1.10395	3.06033e-37
ENSG00000231273	RP11-343D24.2		1.22141	0.00121564
ENSG00000259994	RP11-305E6.4		1.20073	2.23505e-12
ENSG00000242474	AC093627.9		3.59281	9.5931e-12
ENSG00000046774	MAGEC2	melanoma antigen family C, 2	3.91485	1.077e-171
ENSG00000249307	RP11-438E5.1		1.17469	1.26465e-13
ENSG00000133665	DYDC2	DPY30 domain containing 2	2.46698	5.44624e-27
ENSG00000164934	DCAF13	DDB1 and CUL4 associated factor 13	1.10709	1.74818e-304
ENSG00000256143	Z95704.5		1.96229	2.01608e-22
ENSG00000074527	NTN4	netrin 4	2.04997	3.2351e-12
ENSG00000260257	RP5-1085F17.3		1.30389	1.4164e-10
ENSG00000241170	RP11-147I3.1		1.4645	4.66071e-05
ENSG00000181514	RP3-474G15.1		1.54744	2.30667e-05
ENSG00000166166	TRMT61A	tRNA methyltransferase 61 homolog A (S. cerevisiae)	1.62912	3.61808e-71
ENSG00000227201	CNN2P1	calponin 2 pseudogene 1	1.13809	0.00427907
ENSG00000116194	ANGPTL1	angiopoietin-like 1	1.3098	7.46886e-06
ENSG00000139908	TSSK4	testis-specific serine kinase 4	1.15295	7.90986e-15
ENSG00000182885	GPR97	G protein-coupled receptor 97	2.06639	3.56382e-09
ENSG00000151655	ITIH2	inter-alpha-trypsin inhibitor heavy chain 2	1.42185	1.17652e-05
ENSG00000086288	NME8	NME/NM23 family member 8	1.01104	0.0231048
ENSG00000169752	NRG4	neuregulin 4	2.1173	1.71918e-94
ENSG00000177191	B3GNT8	UDP-GlcNAc:betaGal beta-1,3-N-acetylglucosaminyltransferase 8	1.94685	4.2175e-07
ENSG00000178229	ZNF543	zinc finger protein 543	1.27422	1.61801e-55
ENSG00000242781	RP11-47P18.2		1.61439	0.00014928
ENSG00000265728	RP11-883A18.3		1.2072	0.00150096
ENSG00000232075	MRPL35P2	mitochondrial ribosomal protein L35 pseudogene 2	1.57967	1.14524e-10
ENSG00000228897	CTD-2021A8.2		1.33275	0.0197068
ENSG00000229543	RP11-90J7.2		1.30921	0.000786027
ENSG00000239670	RP4-803A2.2		1.61546	1.99848e-13
ENSG00000187714	SLC18A3	solute carrier family 18 (vesicular acetylcholine), member 3	2.4569	3.08833e-12
ENSG00000245685	AF146191.4		2.15124	1.30197e-17
ENSG00000239501	RP11-101P17.6		3.5303	9.88974e-08
ENSG00000198734	F5	coagulation factor V (proaccelerin, labile factor)	2.26011	1.60407e-11
ENSG00000141028	CDRT15P1	CMT1A duplicated region transcript 15 pseudogene 1	1.54565	2.60189e-07
ENSG00000259942	RP11-292F22.7		1.30839	0.000495922
ENSG00000249614	RP11-703G6.1		1.08595	2.92547e-29
ENSG00000266640	MIR4754	microRNA 4754	2.596	0.000970211
ENSG00000246130	RP11-875O11.2		1.59395	0.0154942
ENSG00000126550	HTN1	histatin 1	4.13033	6.63397e-192
ENSG00000204556	CTD-2514C3.1		1.78745	0.000241691
ENSG00000145649	GZMA	granzyme A (granzyme 1, cytotoxic T-lymphocyte-associated serine esterase 3)	1.37885	0.000734193
ENSG00000237595	RP11-112L6.3		2.04656	2.20498e-21
ENSG00000170925	TEX13B	testis expressed 13B	2.97747	1.09614e-21
ENSG00000152268	SPON1	spondin 1, extracellular matrix protein	1.18918	1.546e-05
ENSG00000172955	ADH6	alcohol dehydrogenase 6 (class V)	1.60783	2.64125e-06
ENSG00000008128	CDK11A	cyclin-dependent kinase 11A	1.03736	4.57327e-30
ENSG00000186977	KRTAP19-5	keratin associated protein 19-5	3.21162	8.76418e-24
ENSG00000125637	PSD4	pleckstrin and Sec7 domain containing 4	1.14961	0.0150961
ENSG00000100024	UPB1	ureidopropionase, beta	2.45597	1.00308e-27
ENSG00000163762	TM4SF18	transmembrane 4 L six family member 18	1.44454	4.1256e-27
ENSG00000234350	AC007405.4		1.18845	3.55144e-08
ENSG00000156858	PRR14	proline rich 14	1.29991	5.90289e-52
ENSG00000243678	NME1-NME2	NME1-NME2 readthrough	1.17265	9.72186e-17
ENSG00000230255	RP11-423O2.1		1.43279	0.000894702
ENSG00000225446	RP4-665J23.2		2.25285	7.92312e-12
ENSG00000174837	EMR1	egf-like module containing, mucin-like, hormone receptor-like 1	1.48027	4.68366e-06
ENSG00000248367	CTB-129O4.1		2.10768	2.94709e-10
ENSG00000231966	RP11-12M5.4		1.94762	1.53095e-07
ENSG00000182050	MGAT4C	mannosyl (alpha-1,3-)-glycoprotein beta-1,4-N-acetylglucosaminyltransferase, isozyme C (putative)	2.49498	2.0234e-13
ENSG00000215915	ATAD3C	ATPase family, AAA domain containing 3C	1.91754	1.83509e-24
ENSG00000233080	CTA-714B7.5		1.24731	2.00439e-07
ENSG00000227543	SPAG5-AS1	SPAG5 antisense RNA 1	1.37337	1.09899e-26
ENSG00000185038	HEATR7B1	HEAT repeat containing 7B1	2.64469	2.47814e-28
ENSG00000204396	VWA7	von Willebrand factor A domain containing 7	3.34126	6.78248e-52
ENSG00000242180	OR51B5	olfactory receptor, family 51, subfamily B, member 5	3.20052	2.28622e-24
ENSG00000171385	KCND3	potassium voltage-gated channel, Shal-related subfamily, member 3	2.06028	1.84723e-47
ENSG00000138670	RASGEF1B	RasGEF domain family, member 1B	1.13378	5.33825e-06
ENSG00000267413	RP11-636O21.1		1.10069	0.00168745
ENSG00000124743	KLHL31	kelch-like 31 (Drosophila)	3.96986	1.38696e-66
ENSG00000264175	MIR3189	microRNA 3189	3.08118	3.27588e-22
ENSG00000248890	HHIP-AS1	HHIP antisense RNA 1	2.45021	1.84037e-05
ENSG00000124159	MATN4	matrilin 4	2.22643	2.98824e-22
ENSG00000241155	ARHGAP31-AS1	ARHGAP31 antisense RNA 1	1.98186	1.21445e-09
ENSG00000236234	AC091132.1		2.16574	0.00797271
ENSG00000263826	RP11-573D15.9		1.28972	1.94752e-41
ENSG00000259692	RP11-499F3.2		1.32254	0.00552462
ENSG00000181097	RP11-429J17.2		1.35004	8.40734e-24
ENSG00000204788	CR769776.4		1.07864	0.0148454
ENSG00000056558	TRAF1	TNF receptor-associated factor 1	3.77453	9.65341e-81
ENSG00000226887	ERVMER34-1	endogenous retrovirus group MER34, member 1	1.07928	0.0140027
ENSG00000183206	POTEC	POTE ankyrin domain family, member C	1.06719	3.55366e-06
ENSG00000198046	ZNF667	zinc finger protein 667	2.29814	5.24325e-76
ENSG00000259495	RP11-210M15.2	Uncharacterized protein	2.077	1.4655e-09
ENSG00000169245	CXCL10	chemokine (C-X-C motif) ligand 10	2.9295	3.84212e-05
ENSG00000229278	RP11-483F11.7		1.20263	0.0173701
ENSG00000095203	EPB41L4B	erythrocyte membrane protein band 4.1 like 4B	4.11701	6.4882e-17
ENSG00000148482	SLC39A12	solute carrier family 39 (zinc transporter), member 12	2.30421	0.0041659
ENSG00000163898	LIPH	lipase, member H	3.87583	3.35995e-73
ENSG00000167635	ZNF146	zinc finger protein 146	1.00161	2.0222e-106
ENSG00000144285	SCN1A	sodium channel, voltage-gated, type I, alpha subunit	2.07648	1.67542e-07
ENSG00000231532	AC022311.1		2.35991	5.32052e-11
ENSG00000235370	CSPG4P5	chondroitin sulfate proteoglycan 4 pseudogene 5	1.83464	2.04043e-06
ENSG00000159708	LRRC36	leucine rich repeat containing 36	2.68318	1.27624e-27
ENSG00000230736	RP1-149A16.3		1.2283	0.000767468
ENSG00000249337	SNX18P25	sorting nexin 18 pseudogene 25	1.10969	0.0114565
ENSG00000225218	AP001628.6		2.63767	1.07597e-21
ENSG00000164236	ANKRD33B	ankyrin repeat domain 33B	1.09627	1.06647e-09
ENSG00000151224	MAT1A	methionine adenosyltransferase I, alpha	2.99041	1.00871e-96
ENSG00000072401	UBE2D1	ubiquitin-conjugating enzyme E2D 1	1.17823	4.33788e-153
ENSG00000245711	CTD-2320O4.2		1.8186	7.59154e-13
ENSG00000180626	ZNF594	zinc finger protein 594	1.59098	3.84386e-48
ENSG00000143450	OAZ3	ornithine decarboxylase antizyme 3	1.43585	6.22735e-18
ENSG00000228160	RP13-57D9.3		2.96677	1.26443e-20
ENSG00000130226	DPP6	dipeptidyl-peptidase 6	1.41764	0.0476492
ENSG00000251292	RP11-380P13.2		1.28034	1.00019e-09
ENSG00000239523	MYLK-AS1	MYLK antisense RNA 1	2.78189	3.62098e-65
ENSG00000250295	RP11-434I12.2		1.39956	0.000226889
ENSG00000246792	RP11-68L18.1		2.21272	1.52341e-17
ENSG00000156009	MAGEA8	melanoma antigen family A, 8	3.5871	1.57379e-28
ENSG00000134339	SAA2	serum amyloid A2	1.60084	5.48576e-07
ENSG00000177504	VCX2	variable charge, X-linked 2	4.72773	3.37984e-55
ENSG00000236432	AC097662.2		2.52656	3.24187e-21
ENSG00000083814	ZNF671	zinc finger protein 671	1.18125	6.34458e-41
ENSG00000267470	CTD-3064H18.6		3.074	2.26427e-98
ENSG00000267010	RP11-108P20.1		2.76038	6.11575e-75
ENSG00000103089	FA2H	fatty acid 2-hydroxylase	3.25982	4.52286e-27
ENSG00000125872	LRRN4	leucine rich repeat neuronal 4	1.38465	0.00117374
ENSG00000215018	COL28A1	collagen, type XXVIII, alpha 1	1.35536	1.41978e-12
ENSG00000223685	LINC00571	long intergenic non-protein coding RNA 571	4.65111	7.57883e-14
ENSG00000184886	PIGW	phosphatidylinositol glycan anchor biosynthesis, class W	1.16645	1.4231e-45
ENSG00000181666	HKR1	HKR1, GLI-Kruppel zinc finger family member	1.40344	2.22034e-276
ENSG00000256223	ZNF10	zinc finger protein 10	1.49434	1.56904e-41
ENSG00000196427	NBPF4	neuroblastoma breakpoint family, member 4	3.52866	3.59154e-44
ENSG00000249592	RP11-440L14.1		1.22092	6.40847e-21
ENSG00000237972	TUBG1P	tubulin, gamma 1 pseudogene	1.76544	2.58288e-05
ENSG00000165805	C12orf50	chromosome 12 open reading frame 50	1.16108	1.37523e-08
ENSG00000186710	CCDC42B	coiled-coil domain containing 42B	1.02404	0.000148741
ENSG00000196581	AJAP1	adherens junctions associated protein 1	2.78472	2.66917e-14
ENSG00000173020	ADRBK1	adrenergic, beta, receptor kinase 1	1.04889	9.31891e-57
ENSG00000110347	MMP12	matrix metallopeptidase 12 (macrophage elastase)	3.76213	3.7455e-10
ENSG00000263198	RP11-517A5.4		1.92812	7.54486e-15
ENSG00000184838	PRR16	proline rich 16	1.72541	1.52334e-43
ENSG00000267191	RP11-15A1.2		2.78577	4.17026e-18
ENSG00000131379	C3orf20	chromosome 3 open reading frame 20	3.47472	2.15508e-25
ENSG00000131746	TNS4	tensin 4	2.42072	3.95457e-11
ENSG00000168876	ANKRD49	ankyrin repeat domain 49	1.27224	1.17598e-103
ENSG00000173338	KCNK7	potassium channel, subfamily K, member 7	2.6164	9.23698e-30
ENSG00000235530	AC087294.2		1.47498	5.62185e-07
ENSG00000267149	CTC-550B14.6		4.00198	6.48998e-37
ENSG00000253626	EIF5AL1	eukaryotic translation initiation factor 5A-like 1	1.31455	0.000618208
ENSG00000183850	ZNF730	zinc finger protein 730	2.70919	6.28828e-05
ENSG00000140749	IGSF6	immunoglobulin superfamily, member 6	1.01158	7.02713e-06
ENSG00000232303	RP11-205M20.7		1.67575	1.55021e-15
ENSG00000239636	RP4-728D4.2		1.4189	6.51564e-06
ENSG00000261136	RP11-37C7.3		2.10558	1.28493e-23
ENSG00000248323	RP11-213H15.3		2.69996	4.33563e-32
ENSG00000168334	XIRP1	xin actin-binding repeat containing 1	2.53212	8.26798e-52
ENSG00000261924	CTD-2561B21.5		1.80009	5.57623e-16
ENSG00000145908	ZNF300	zinc finger protein 300	3.24218	0
ENSG00000261512	RP11-46D6.1		1.10715	3.50254e-05
ENSG00000175768	TOMM5	translocase of outer mitochondrial membrane 5 homolog (yeast)	1.26931	2.73155e-41
ENSG00000029534	ANK1	ankyrin 1, erythrocytic	3.10601	3.11388e-05
ENSG00000151687	ANKAR	ankyrin and armadillo repeat containing	1.61246	1.88849e-25
ENSG00000165272	AQP3	aquaporin 3 (Gill blood group)	4.11589	5.04673e-41
ENSG00000253882	RP11-61L23.2		1.82304	2.09257e-10
ENSG00000164266	SPINK1	serine peptidase inhibitor, Kazal type 1	2.52121	3.34913e-08
ENSG00000251574	RP11-6N13.1		1.4277	2.48951e-05
ENSG00000162616	DNAJB4	DnaJ (Hsp40) homolog, subfamily B, member 4	1.01605	5.27524e-71
ENSG00000236318	AC019117.1		1.9733	1.2546e-06
ENSG00000167604	NFKBID	nuclear factor of kappa light polypeptide gene enhancer in B-cells inhibitor, delta	1.39943	5.06873e-17
ENSG00000125740	FOSB	FBJ murine osteosarcoma viral oncogene homolog B	1.77754	1.00336e-41
ENSG00000247324	RP11-510M2.2		2.03247	9.6322e-12
ENSG00000229758	DYNLT3P2	dynein, light chain, Tctex-type 3 pseudogene 2	1.88569	0.0203115
ENSG00000155719	OTOA	otoancorin	2.59626	9.35254e-26
ENSG00000251209	RP11-82I10.1	Uncharacterized protein	1.11897	9.54929e-08
ENSG00000147996	CBWD5	COBW domain containing 5	1.07386	4.22313e-11
ENSG00000158486	DNAH3	dynein, axonemal, heavy chain 3	1.83409	9.42515e-10
ENSG00000212724	KRTAP2-3	keratin associated protein 2-3	7.7895	2.07575e-279
ENSG00000229092	IGHV3-47	immunoglobulin heavy variable 3-47 (pseudogene)	1.21441	0.0131077
ENSG00000249409	RP11-501E14.1		1.11506	2.05214e-16
ENSG00000145864	GABRB2	gamma-aminobutyric acid (GABA) A receptor, beta 2	3.71819	3.539e-14
ENSG00000127084	FGD3	FYVE, RhoGEF and PH domain containing 3	1.06502	0.00652263
ENSG00000164796	CSMD3	CUB and Sushi multiple domains 3	2.31823	7.86726e-08
ENSG00000234134	RP11-383C5.5		1.26481	5.0111e-05
ENSG00000247363	RP11-637A17.2		2.05139	1.24088e-13
ENSG00000236066	RP11-389O22.1		1.7417	5.78879e-06
ENSG00000143858	SYT2	synaptotagmin II	2.37122	1.1774e-32
ENSG00000235586	AC011247.3		1.13404	0.000127381
ENSG00000255314	RP11-702F3.3		1.30259	0.00098105
ENSG00000241570	RP11-372E1.6		1.29469	5.17492e-10
ENSG00000166670	MMP10	matrix metallopeptidase 10 (stromelysin 2)	2.72095	4.9461e-13
ENSG00000224420	C19orf76	chromosome 19 open reading frame 76	2.69852	8.94262e-66
ENSG00000255010	RP11-113K21.3		1.41383	0.00291047
ENSG00000266313	RP11-173M1.4		1.62409	7.84924e-06
ENSG00000074935	TUBE1	tubulin, epsilon 1	1.10378	3.79746e-53
ENSG00000259640	RP6-33F8.1		2.60741	1.16671e-05
ENSG00000086730	LAT2	linker for activation of T cells family, member 2	1.05039	1.49433e-10
ENSG00000070031	SCT	secretin	1.23836	0.000739186
ENSG00000169059	VCX3A	variable charge, X-linked 3A	5.55565	1.26387e-68
ENSG00000173988	LRRC63	leucine rich repeat containing 63	2.27996	1.73497e-12
ENSG00000226979	LTA	lymphotoxin alpha (TNF superfamily, member 1)	2.30226	4.71034e-10
ENSG00000189419	RP11-168G16.1		1.07859	5.17759e-07
ENSG00000145075	CCDC39	coiled-coil domain containing 39	1.14336	8.54707e-34
ENSG00000239608	RUVBL1-AS1	RUVBL1 antisense RNA 1	1.05454	0.0347883
ENSG00000185958	FAM186A	family with sequence similarity 186, member A	1.26168	8.23245e-07
ENSG00000261280	CTD-3105H18.13		4.23567	3.11628e-10
ENSG00000251429	RP11-597D13.7		3.61428	7.17994e-27
ENSG00000183018	SPNS2	spinster homolog 2 (Drosophila)	2.98457	5.39883e-70
ENSG00000198300	PEG3	paternally expressed 3	6.64568	7.94501e-110
ENSG00000258115	RP11-89M22.3		1.19251	0.0209951
ENSG00000253106	RP11-158K1.3		1.03715	1.76301e-13
ENSG00000223922	ASS1P2	argininosuccinate synthetase 1 pseudogene 2	1.78752	1.21889e-10
ENSG00000260949	KB-1836B5.1		2.12446	1.2262e-12
ENSG00000172201	ID4	inhibitor of DNA binding 4, dominant negative helix-loop-helix protein	1.85573	9.29156e-54
ENSG00000267672	CTD-2293H3.1		1.85955	5.25218e-06
ENSG00000260981	RP11-315A16.1		1.14503	0.000260392
ENSG00000226468	AC018641.7		2.82983	2.36392e-14
ENSG00000243629	RP11-6F2.4		2.26705	8.07375e-09
ENSG00000178636	RP11-455G16.1	Uncharacterized protein	2.08099	2.72552e-24
ENSG00000173947	C1orf88	chromosome 1 open reading frame 88	1.82755	5.37684e-05
ENSG00000232021	LEF1-AS1	LEF1 antisense RNA 1	2.44834	1.36624e-47
ENSG00000235072	AC012074.2		1.1618	0.0240435
ENSG00000211962	IGHV1-46	immunoglobulin heavy variable 1-46	1.94552	1.75494e-06
ENSG00000101247	NDUFAF5	NADH dehydrogenase (ubiquinone) complex I, assembly factor 5	1.03776	1.9078e-87
ENSG00000136383	ALPK3	alpha-kinase 3	1.0108	1.34051e-05
ENSG00000156886	ITGAD	integrin, alpha D	1.08417	0.000161156
ENSG00000004848	ARX	aristaless related homeobox	2.27044	0.00511203
ENSG00000200879	SNORD14E	small nucleolar RNA, C/D box 14E	5.96102	3.01997e-44
ENSG00000168757	TSPY2	testis specific protein, Y-linked 2	3.34852	1.24607e-20
ENSG00000230606	AC159540.1		1.2184	6.46872e-22
ENSG00000258168	RP11-588H23.3		2.38242	3.74869e-20
ENSG00000144642	RBMS3	RNA binding motif, single stranded interacting protein 3	1.41379	4.41434e-20
ENSG00000267018	AC010525.7		1.9493	1.52973e-24
ENSG00000226396	RP5-1056L3.3		3.17464	4.92558e-49
ENSG00000251141	RP11-53O19.1		2.43325	5.49157e-43
ENSG00000260645	RP11-250B2.5		1.40348	0.000201428
ENSG00000179673	RPRML	reprimo-like	1.28867	0.00539141
ENSG00000236751	RP1-30G7.2		4.00168	5.71764e-34
ENSG00000260000	RP3-467N11.1		2.84738	6.70539e-96
ENSG00000256546	AC156455.1		1.15036	1.54019e-09
ENSG00000227155	RP11-165F24.3		2.18023	0.00759028
ENSG00000205853	RFPL3-AS1	RFPL3 antisense RNA 1	1.99477	1.32912e-13
ENSG00000196268	ZNF493	zinc finger protein 493	1.98297	5.01951e-63
ENSG00000170160	CCDC144A	coiled-coil domain containing 144A	1.09787	3.72216e-06
ENSG00000196503	ARL9	ADP-ribosylation factor-like 9	1.53009	0.000298009
ENSG00000120742	SERP1	stress-associated endoplasmic reticulum protein 1	1.5015	1.44811e-214
ENSG00000172062	SMN1	survival of motor neuron 1, telomeric	1.0494	1.92759e-26
ENSG00000253117	OC90	otoconin 90	1.60549	0.000253013
ENSG00000011132	APBA3	amyloid beta (A4) precursor protein-binding, family A, member 3	1.33682	2.34291e-42
ENSG00000228794	RP11-206L10.11		1.27344	1.26119e-138
ENSG00000188199	FAM22B	family with sequence similarity 22, member B	1.06465	0.00798982
ENSG00000189127	ANKRD34B	ankyrin repeat domain 34B	2.57778	3.53618e-08
ENSG00000176988	FMR1NB	fragile X mental retardation 1 neighbor	2.87446	1.89224e-11
ENSG00000189350	FAM179A	family with sequence similarity 179, member A	2.08508	5.18091e-18
ENSG00000201784	SNORD14A	small nucleolar RNA, C/D box 14A	1.5826	4.21861e-13
ENSG00000254401	RP11-179A10.1		2.16584	1.38373e-07
ENSG00000168661	ZNF30	zinc finger protein 30	1.53243	1.76842e-39
ENSG00000250390	RP11-338H14.1		1.16518	0.00125997
ENSG00000137860	SLC28A2	solute carrier family 28 (sodium-coupled nucleoside transporter), member 2	1.34103	1.1556e-05
ENSG00000058085	LAMC2	laminin, gamma 2	1.61389	4.39334e-09
ENSG00000157211	CDCP2	CUB domain containing protein 2	1.48275	0.00038656
ENSG00000071994	PDCD2	programmed cell death 2	1.01083	3.26043e-81
ENSG00000198695	MT-ND6	mitochondrially encoded NADH dehydrogenase 6	1.05905	1.92302e-18
ENSG00000085274	MYNN	myoneurin	1.24247	8.4834e-210
ENSG00000125650	PSPN	persephin	1.95492	2.60698e-09
ENSG00000206530	WDR52	WD repeat domain 52	1.57144	5.87558e-198
ENSG00000146090	RASGEF1C	RasGEF domain family, member 1C	3.12936	1.31908e-11
ENSG00000255384	RP11-770J1.4		1.10069	0.00892765
ENSG00000260651	AF213884.2		1.41947	0.00216313
ENSG00000260196	RP1-239B22.5		2.21776	2.40421e-69
ENSG00000188573	FBLL1	fibrillarin-like 1	1.78818	2.40661e-21
ENSG00000249650	RP11-310P5.1		1.79074	0.000808535
ENSG00000184348	HIST1H2AK	histone cluster 1, H2ak	1.16332	4.11477e-05
ENSG00000222640	U2	U2 spliceosomal RNA	1.48452	0.000995289
ENSG00000224738	AC099850.1		1.00593	1.04275e-07
ENSG00000189266	PNRC2	proline-rich nuclear receptor coactivator 2	1.15341	0
ENSG00000138100	TRIM54	tripartite motif containing 54	1.37245	8.98655e-05
ENSG00000016082	ISL1	ISL LIM homeobox 1	1.76751	1.39562e-08
ENSG00000258451	RP11-903H12.3		2.57916	0.00100151
ENSG00000226698	RP1-50O24.6		1.1397	6.52988e-18
ENSG00000181392	SYNE4	spectrin repeat containing, nuclear envelope family member 4	1.68649	1.30997e-08
ENSG00000225194	LINC00092	long intergenic non-protein coding RNA 92	1.09007	0.0242142
ENSG00000229558	SACS-AS1	SACS antisense RNA 1	1.16238	0.00062613
ENSG00000166349	RAG1	recombination activating gene 1	1.25346	1.31311e-14
ENSG00000135437	RDH5	retinol dehydrogenase 5 (11-cis/9-cis)	1.27047	5.93034e-08
ENSG00000232811	RP11-96K19.2		1.58295	4.08002e-07
ENSG00000019505	SYT13	synaptotagmin XIII	1.0438	0.0198491
ENSG00000151789	ZNF385D	zinc finger protein 385D	2.20136	0.00686157
ENSG00000205111	CDKL4	cyclin-dependent kinase-like 4	2.38317	0.00287354
ENSG00000135119	RNFT2	ring finger protein, transmembrane 2	1.16071	3.10695e-39
ENSG00000182389	CACNB4	calcium channel, voltage-dependent, beta 4 subunit	1.34554	1.30456e-11
ENSG00000229621	AC018742.1		4.01032	3.61098e-40
ENSG00000257135	RP11-320M2.1		1.54389	6.06881e-06
ENSG00000189042	ZNF567	zinc finger protein 567	1.37767	4.27398e-66
ENSG00000256895	AF127577.1		2.01727	0.0108352
ENSG00000251432	RP11-420A23.1		1.46064	1.39618e-31
ENSG00000261220	RP11-629O1.2		1.51078	1.08163e-26
ENSG00000250616	RP11-455F5.3		1.15414	2.00164e-05
ENSG00000213981	AC007277.3		1.44573	0.000936629
ENSG00000243069	ARHGEF26-AS1	ARHGEF26 antisense RNA 1	1.03443	4.38332e-09
ENSG00000242791	RP11-651P23.5		1.88695	3.79684e-05
ENSG00000078018	MAP2	microtubule-associated protein 2	1.82083	8.05068e-109
ENSG00000187848	P2RX2	purinergic receptor P2X, ligand-gated ion channel, 2	1.14404	0.000766315
ENSG00000241278	RP11-379B18.4		1.87993	0.000560385
ENSG00000229666	MAST4-AS1	MAST4 antisense RNA 1	2.19051	6.08308e-10
ENSG00000125787	GNRH2	gonadotropin-releasing hormone 2	1.83173	9.39587e-17
ENSG00000228708	AL109763.1		3.164	1.49339e-13
ENSG00000230163	RP5-997D16.2		2.09503	4.34912e-34
ENSG00000260938	RP4-593C16.3		1.34667	0.000161595
ENSG00000130948	HSD17B3	hydroxysteroid (17-beta) dehydrogenase 3	2.96627	1.23471e-15
ENSG00000152454	ZNF256	zinc finger protein 256	1.46351	4.6829e-72
ENSG00000105202	FBL	fibrillarin	1.3295	8.54134e-69
ENSG00000132911	NMUR2	neuromedin U receptor 2	2.10026	0.0107324
ENSG00000163915	C3orf65	chromosome 3 open reading frame 65	2.98267	8.19494e-14
ENSG00000183668	PSG9	pregnancy specific beta-1-glycoprotein 9	2.35403	2.51095e-08
ENSG00000211959	IGHV4-39	immunoglobulin heavy variable 4-39	1.89811	0.000138772
ENSG00000260604	RP1-140K8.5		2.65935	3.84335e-10
ENSG00000151967	SCHIP1	schwannomin interacting protein 1	3.47721	2.28479e-12
ENSG00000237943	RP11-5N23.2		2.4234	0.00120352
ENSG00000233061	TTLL7-IT1	TTLL7 intronic transcript 1 (non-protein coding)	1.20436	0.000250181
ENSG00000246225	RP11-17A1.3		1.60888	0.0105831
ENSG00000196593	ANKRD20A19P	ankyrin repeat domain 20 family, member A19, pseudogene	1.57796	2.49142e-05
ENSG00000189045	ANKDD1B	ankyrin repeat and death domain containing 1B	1.51723	0.00984093
ENSG00000175573	C11orf68	chromosome 11 open reading frame 68	1.32212	4.93291e-45
ENSG00000258457	RP11-298I3.4		1.69955	2.95821e-09
ENSG00000174279	EVX2	even-skipped homeobox 2	1.20861	0.00220715
ENSG00000174564	IL20RB	interleukin 20 receptor beta	2.42177	4.11684e-38
ENSG00000178381	ZFAND2A	zinc finger, AN1-type domain 2A	2.15393	7.65507e-276
ENSG00000182676	PPP1R27	protein phosphatase 1, regulatory subunit 27	2.77216	9.60205e-21
ENSG00000224903	AC005534.8		2.33247	1.37105e-12
ENSG00000249910	TRIM51CP	tripartite motif-containing 51C, pseudogene	2.39922	0.00149914
ENSG00000170421	KRT8	keratin 8	1.81525	5.38029e-14
ENSG00000262012	RP11-461A8.2		1.28947	5.95891e-05
ENSG00000265298	RP13-104F24.3		1.1272	2.87994e-26
ENSG00000178093	TSSK6	testis-specific serine kinase 6	1.02432	9.96943e-16
ENSG00000204653	ASPDH	aspartate dehydrogenase domain containing	1.50742	0.0365651
ENSG00000130413	STK33	serine/threonine kinase 33	1.26843	3.68264e-09
ENSG00000241015	TPM3P9	tropomyosin 3 pseudogene 9	2.03108	1.58514e-139
ENSG00000196511	TPK1	thiamin pyrophosphokinase 1	1.35838	2.55131e-26
ENSG00000167703	SLC43A2	solute carrier family 43, member 2	2.08475	2.20012e-63
ENSG00000164920	OSR2	odd-skipped related 2 (Drosophila)	1.83108	5.43845e-56
ENSG00000243024	RPS11P6	ribosomal protein S11 pseudogene 6	1.59454	0.000779278
ENSG00000246145	RP11-346I3.4		2.18004	9.55602e-26
ENSG00000249437	NAIP	NLR family, apoptosis inhibitory protein	1.64163	6.78984e-40
ENSG00000189164	ZNF527	zinc finger protein 527	1.3791	4.12738e-47
ENSG00000145431	PDGFC	platelet derived growth factor C	2.1835	7.23678e-178
ENSG00000177238	TRIM72	tripartite motif containing 72	1.2041	0.0133192
ENSG00000062524	LTK	leukocyte receptor tyrosine kinase	1.87548	4.5057e-17
ENSG00000183778	B3GALT5	UDP-Gal:betaGlcNAc beta 1,3-galactosyltransferase, polypeptide 5	2.46984	0.000422915
ENSG00000215504	AP000974.1	CDNA FLJ26432 fis, clone KDN01418; Uncharacterized protein	1.11842	6.32339e-13
ENSG00000111725	PRKAB1	protein kinase, AMP-activated, beta 1 non-catalytic subunit	1.2516	7.67155e-119
ENSG00000231407	RP11-576I22.2		1.37237	6.02982e-08
ENSG00000257497	RP11-585P4.5		2.24386	5.63171e-18
ENSG00000138347	MYPN	myopalladin	1.45379	1.33975e-05
ENSG00000117425	PTCH2	patched 2	2.97818	2.42601e-71
ENSG00000207110	U1	U1 spliceosomal RNA	2.10865	0.00713628
ENSG00000208317	SNORD78	small nucleolar RNA, C/D box 78	1.15171	3.55493e-13
ENSG00000261103	RP11-298D21.3		2.77757	1.3428e-07
ENSG00000263731	RP11-498C9.15		1.16193	1.91194e-07
ENSG00000253633	KB-1980E6.3	Uncharacterized protein	1.30326	0.00397863
ENSG00000248734	CTD-2260A17.1		1.32087	0.00130531
ENSG00000189334	S100A14	S100 calcium binding protein A14	1.39697	4.94339e-05
ENSG00000185792	NLRP9	NLR family, pyrin domain containing 9	2.3594	6.4711e-30
ENSG00000224975	INE1	inactivation escape 1 (non-protein coding)	1.07183	3.96171e-14
ENSG00000197780	TAF13	TAF13 RNA polymerase II, TATA box binding protein (TBP)-associated factor, 18kDa	1.15574	5.99023e-302
ENSG00000244128	RP11-85M11.2		2.53494	9.65312e-09
ENSG00000242569	BX004987.3		1.52103	1.93725e-17
ENSG00000264324	RP11-287D1.3		1.60875	0.00109933
ENSG00000213398	LCAT	lecithin-cholesterol acyltransferase	1.36063	6.44298e-32
ENSG00000118004	COLEC11	collectin sub-family member 11	4.06492	2.4557e-36
ENSG00000228623	ZNF883	zinc finger protein 883	2.62051	5.62482e-62
ENSG00000137876	RSL24D1	ribosomal L24 domain containing 1	1.20876	4.53533e-64
ENSG00000169047	IRS1	insulin receptor substrate 1	1.54227	2.07943e-143
ENSG00000236055	RP11-423O2.2		1.49291	0.000585409
ENSG00000125514	LINC00029	long intergenic non-protein coding RNA 29	1.17709	0.0365418
ENSG00000260306	RP11-645C24.5		1.2716	0.000734643
ENSG00000235782	RP3-333A15.1		4.64117	1.45738e-59
ENSG00000263551	RP11-78F17.1		1.00793	0.00417404
ENSG00000251598	RP11-789C2.1		1.80373	0.000122962
ENSG00000253661	ZFHX4-AS1	ZFHX4 antisense RNA 1	2.55699	2.55575e-08
ENSG00000049249	TNFRSF9	tumor necrosis factor receptor superfamily, member 9	3.12539	2.35361e-15
ENSG00000186777	ZNF732	zinc finger protein 732	2.72776	1.76922e-11
ENSG00000166396	SERPINB7	serpin peptidase inhibitor, clade B (ovalbumin), member 7	3.19916	1.57708e-16
ENSG00000259929	CTA-481E9.4		2.00471	1.16699e-08
ENSG00000231205	ZNF826P	zinc finger protein 826, pseudogene	2.71972	3.98389e-15
ENSG00000122254	HS3ST2	heparan sulfate (glucosamine) 3-O-sulfotransferase 2	1.54101	1.41061e-05
ENSG00000185338	SOCS1	suppressor of cytokine signaling 1	1.60491	1.05705e-10
ENSG00000163814	CDCP1	CUB domain containing protein 1	2.0496	1.25585e-25
ENSG00000160111	CPAMD8	C3 and PZP-like, alpha-2-macroglobulin domain containing 8	1.44296	5.8274e-05
ENSG00000262172	CTD-2529O21.1		1.85713	8.19461e-09
ENSG00000261268	RP11-308D13.3		1.58155	0.00130625
ENSG00000255052	FAM66D	family with sequence similarity 66, member D	2.74346	0.000361968
ENSG00000081041	CXCL2	chemokine (C-X-C motif) ligand 2	2.27435	1.50924e-25
ENSG00000130479	MAP1S	microtubule-associated protein 1S	1.01179	1.97888e-43
ENSG00000227568	SNX18P26	sorting nexin 18 pseudogene 26	1.41306	0.0242519
ENSG00000208028	MIR616	microRNA 616	2.51878	1.57799e-23
ENSG00000083750	RRAGB	Ras-related GTP binding B	1.30828	5.61212e-55
ENSG00000204540	PSORS1C1	psoriasis susceptibility 1 candidate 1	1.72257	9.0895e-13
ENSG00000243155	RP11-46A10.5		2.04781	8.48937e-61
ENSG00000151322	NPAS3	neuronal PAS domain protein 3	1.01789	0.00314209
ENSG00000174236	REP15	RAB15 effector protein	1.44914	0.0452945
ENSG00000200913	SNORD46	small nucleolar RNA, C/D box 46	1.31507	4.90317e-07
ENSG00000250016	SNX18P23	sorting nexin 18 pseudogene 23	2.45404	0.000989134
ENSG00000134240	HMGCS2	3-hydroxy-3-methylglutaryl-CoA synthase 2 (mitochondrial)	1.46857	0.0165556
ENSG00000250769	RP11-241F15.3		1.60788	2.73645e-07
ENSG00000251323	RP11-452H21.4		1.90175	7.412e-23
ENSG00000265749	RP11-849F2.5		1.26355	7.35932e-11
ENSG00000225985	RP11-214F16.3		1.5122	0.00222934
ENSG00000265500	SENP3-EIF4A1		1.34692	1.72878e-08
ENSG00000133794	ARNTL	aryl hydrocarbon receptor nuclear translocator-like	1.32299	5.02717e-135
ENSG00000254459	RP11-91P24.7		2.14333	2.30232e-08
ENSG00000231702	RP11-54O7.10		1.89579	0.00746372
ENSG00000175213	ZNF408	zinc finger protein 408	1.19865	3.95217e-38
ENSG00000228290	RP11-132M7.3		1.16458	0.0356751
ENSG00000266446	RP11-149I2.4		1.83844	1.33592e-07
ENSG00000253559	OSGEPL1-AS1	OSGEPL1 antisense RNA 1	1.62503	5.45695e-09
ENSG00000196859	KRT39	keratin 39	3.73925	9.8534e-08
ENSG00000130055	GDPD2	glycerophosphodiester phosphodiesterase domain containing 2	2.04031	7.68404e-05
ENSG00000234772	RP11-428O18.4		2.45721	2.86515e-10
ENSG00000223511	RP13-297E16.4		4.92177	1.70793e-16
ENSG00000231294	AC006994.2		1.06383	0.0272618
ENSG00000122035	RASL11A	RAS-like, family 11, member A	1.77053	5.81995e-20
ENSG00000167524	SGK494	uncharacterized serine/threonine-protein kinase SgK494	2.53229	1.37477e-69
ENSG00000229401	RP1-290I10.7		1.20175	1.31832e-07
ENSG00000171487	NLRP5	NLR family, pyrin domain containing 5	3.53913	1.53768e-19
ENSG00000228601	RPL39P	ribosomal protein L39 pseudogene	1.50125	0.00314668
ENSG00000234654	BX571672.8		2.1468	6.49313e-06
ENSG00000234231	AC093616.4		1.09333	2.17537e-07
ENSG00000240106	Metazoa_SRP	Metazoan signal recognition particle RNA	1.15016	0.00516523
ENSG00000251441	RTEL1P1	regulator of telomere elongation helicase 1 pseudogene 1	3.28924	5.64801e-22
ENSG00000171804	WDR87	WD repeat domain 87	5.51334	6.65484e-54
ENSG00000226167	AP4B1-AS1	AP4B1 antisense RNA 1	1.81393	1.36437e-25
ENSG00000182983	ZNF662	zinc finger protein 662	4.18471	4.31235e-64
ENSG00000178297	TMPRSS9	transmembrane protease, serine 9	1.27166	2.44001e-10
ENSG00000161381	PLXDC1	plexin domain containing 1	1.54067	8.31719e-08
ENSG00000231242	RP11-87H9.3		1.3729	8.95434e-09
ENSG00000165494	PCF11	PCF11, cleavage and polyadenylation factor subunit, homolog (S. cerevisiae)	1.11164	9.14556e-67
ENSG00000266490	CTD-2349P21.9		1.20369	2.26154e-09
ENSG00000260114	CTD-2574D22.4		1.8372	5.28625e-119
ENSG00000164619	BMPER	BMP binding endothelial regulator	1.43628	0.00499106
ENSG00000244336	RP11-479G22.3		1.84954	1.56516e-10
ENSG00000225187	AC073283.7		3.17968	1.46225e-14
ENSG00000230177	RP5-1112D6.4		1.65907	4.18793e-08
ENSG00000246366	RP11-382J12.1	Uncharacterized protein	1.64934	7.2824e-16
ENSG00000211961	IGHV1-45	immunoglobulin heavy variable 1-45	1.7088	0.000477581
ENSG00000231646	AC008174.3		2.12868	4.65115e-06
ENSG00000105877	DNAH11	dynein, axonemal, heavy chain 11	2.66354	7.17634e-27
ENSG00000149582	TMEM25	transmembrane protein 25	2.0557	8.09347e-11
ENSG00000249618	RP11-422J15.1		1.70882	0.0399029
ENSG00000234424	RP11-213G2.1		4.32353	5.55739e-33
ENSG00000252827	7SK	7SK RNA	1.05261	0.0104816
ENSG00000226250	RP11-442J17.2		1.26932	0.03156
ENSG00000118557	PMFBP1	polyamine modulated factor 1 binding protein 1	1.02265	2.67892e-06
ENSG00000267317	CTB-25B13.12		1.79622	1.18854e-66
ENSG00000235958	UBOX5-AS1	UBOX5 antisense RNA 1	1.7714	3.16393e-07
ENSG00000260572	RP11-16N11.2		3.0027	2.50982e-51
ENSG00000237457	RP11-547I7.2		1.83041	0.000136966
ENSG00000249637	CTC-329D1.2		1.27216	3.20662e-08
ENSG00000225588	AC096669.1		1.06253	0.000757244
ENSG00000168263	KCNV2	potassium channel, subfamily V, member 2	1.10024	3.30109e-05
ENSG00000152467	ZSCAN1	zinc finger and SCAN domain containing 1	4.90428	1.02529e-41
ENSG00000258476	RP11-76E17.3		1.40914	0.00922218
ENSG00000215241	RP11-266K4.9		1.05274	3.00687e-07
ENSG00000262691	CTC-277H1.7		1.22773	1.24049e-15
ENSG00000174844	DNAH12	dynein, axonemal, heavy chain 12	1.99954	5.50541e-08
ENSG00000218823	PAPOLB	poly(A) polymerase beta (testis specific)	2.49928	1.06589e-08
ENSG00000161583	TBC1D3G	TBC1 domain family, member 3G	1.14742	0.000784228
ENSG00000213590	RP11-229P13.2		1.12937	5.42728e-06
ENSG00000225526	MKRN2-AS1	MKRN2 antisense RNA 1	1.50998	2.24596e-08
ENSG00000236138	RP11-413E6.7		1.99905	3.06184e-08
ENSG00000118420	UBE3D	ubiquitin protein ligase E3D	1.10798	1.82418e-48
ENSG00000254509	RP11-677M14.6		1.1074	0.01321
ENSG00000254869	RP11-91I20.2		1.47534	0.00611503
ENSG00000204682	C10orf114	chromosome 10 open reading frame 114	2.22652	2.91974e-47
ENSG00000229463	LYST-IT2	LYST intronic transcript 2 (non-protein coding)	1.45618	0.0403669
ENSG00000236078	AC095067.1		1.14969	1.12155e-06
ENSG00000248884	CTC-537E7.3		1.17734	0.0481183
ENSG00000125998	FAM83C	family with sequence similarity 83, member C	2.31442	9.17016e-07
ENSG00000212939	RP1-29C18.10		2.05341	1.78067e-08
ENSG00000051180	RAD51	RAD51 homolog (S. cerevisiae)	1.086	6.83399e-25
ENSG00000174255	ZNF80	zinc finger protein 80	1.47982	0.00161343
ENSG00000196081	ZNF724P	zinc finger protein 724, pseudogene	1.80217	8.7756e-21
ENSG00000249359	RP11-374A4.1		1.81258	3.66126e-05
ENSG00000251135	AC008565.1		2.16213	0.00168224
ENSG00000260740	AC026471.6		3.60725	1.98174e-18
ENSG00000115956	PLEK	pleckstrin	2.81896	1.35087e-10
ENSG00000260430	RP11-626G11.4		1.39792	0.0354177
ENSG00000236683	HMGA1P1	high mobility group AT-hook 1 pseudogene 1	1.03507	0.0360988
ENSG00000203276	AL353898.2		2.00193	1.29977e-24
ENSG00000106236	NPTX2	neuronal pentraxin II	1.3643	0.000759788
ENSG00000249462	MLLT10P2	myeloid/lymphoid or mixed-lineage leukemia (trithorax homolog, Drosophila); translocated to, 10 pseudogene 2	2.00302	9.41316e-05
ENSG00000213385	RP11-577H5.1		2.44667	1.48359e-31
ENSG00000231194	FARP1-AS1	FARP1 antisense RNA 1	1.54721	0.000628941
ENSG00000229481	CTD-2554C21.3		3.11151	7.83883e-14
ENSG00000173991	TCAP	titin-cap (telethonin)	3.12571	3.45522e-82
ENSG00000224086	LL22NC03-86G7.1		1.39906	1.5229e-14
ENSG00000204428	LY6G5C	lymphocyte antigen 6 complex, locus G5C	1.57314	1.6549e-05
ENSG00000174194	AGAP8	ArfGAP with GTPase domain, ankyrin repeat and PH domain 8	1.15367	4.81761e-09
ENSG00000069764	PLA2G10	phospholipase A2, group X	1.35931	0.0025646
ENSG00000261050	RP11-145F16.2		1.24291	1.64883e-13
ENSG00000255966	RP5-940J5.3		2.37958	3.73647e-15
ENSG00000212607	SNORA45	small nucleolar RNA, H/ACA box 45	2.09742	1.50148e-18
ENSG00000260396	AC012065.7		1.25425	1.11695e-05
ENSG00000168748	CA7	carbonic anhydrase VII	3.14367	1.7553e-08
ENSG00000176236	C10orf111	chromosome 10 open reading frame 111	1.78109	1.17747e-10
ENSG00000168398	BDKRB2	bradykinin receptor B2	1.41945	0.0358831
ENSG00000204118	NAP1L6	nucleosome assembly protein 1-like 6	1.94309	8.63673e-08
ENSG00000139364	TMEM132B	transmembrane protein 132B	2.43135	5.42732e-22
ENSG00000228043	AC097721.2		1.53006	6.55371e-14
ENSG00000259315	RP11-752G15.9		1.26018	2.94006e-06
ENSG00000229320	KRT8P12	keratin 8 pseudogene 12	2.56536	0
ENSG00000102981	PARD6A	par-6 partitioning defective 6 homolog alpha (C. elegans)	1.01193	6.37175e-11
ENSG00000158553	POM121L2	POM121 transmembrane nucleoporin-like 2	1.53434	0.0251144
ENSG00000258803	RP11-624J12.1		4.28675	3.97472e-33
ENSG00000204136	GGTA1P	glycoprotein, alpha-galactosyltransferase 1 pseudogene	1.1832	0.0189839
ENSG00000251136	RP11-37B2.1		1.11769	3.99831e-13
ENSG00000255538	OR10V2P	olfactory receptor, family 10, subfamily V, member 2 pseudogene	2.22484	2.96797e-09
ENSG00000092295	TGM1	transglutaminase 1 (K polypeptide epidermal type I, protein-glutamine-gamma-glutamyltransferase)	3.79245	6.00114e-73
ENSG00000261597	RP11-353B9.1		1.76332	2.42469e-07
ENSG00000237522	NONOP2	non-POU domain containing, octamer-binding pseudogene 2	1.1196	9.04609e-08
ENSG00000230325	RP11-385F5.4		2.18886	1.28163e-05
ENSG00000258454	RP11-361H10.3		1.43878	0.000299778
ENSG00000123496	IL13RA2	interleukin 13 receptor, alpha 2	1.3561	0.000235707
ENSG00000224888	RP5-1142A6.2		1.40374	4.28984e-11
ENSG00000184786	TCTE3	t-complex-associated-testis-expressed 3	1.92843	9.51731e-19
ENSG00000235790	RP11-73M7.6		1.16486	9.63943e-05
ENSG00000156006	NAT2	N-acetyltransferase 2 (arylamine N-acetyltransferase)	2.14268	0.00181698
ENSG00000248643	RBM14-RBM4	RBM14-RBM4 readthrough	1.03081	1.67468e-08
ENSG00000182632	CCNYL2	cyclin Y-like 2	2.45327	3.6926e-44
ENSG00000197016	ZNF470	zinc finger protein 470	1.42516	1.39246e-59
ENSG00000228022	HCG20	HLA complex group 20 (non-protein coding)	1.167	2.83577e-09
ENSG00000240877	Metazoa_SRP	Metazoan signal recognition particle RNA	2.07815	1.15967e-08
ENSG00000142684	ZNF593	zinc finger protein 593	1.89049	6.15884e-34
ENSG00000257800	RP11-287D1.1		2.04655	1.65386e-08
ENSG00000137142	IGFBPL1	insulin-like growth factor binding protein-like 1	1.96507	0.00168696
ENSG00000107105	ELAVL2	ELAV (embryonic lethal, abnormal vision, Drosophila)-like 2 (Hu antigen B)	1.4762	3.79715e-05
ENSG00000244061	RP11-389C8.1		2.59261	5.4166e-09
ENSG00000166246	C16orf71	chromosome 16 open reading frame 71	1.54137	4.20087e-15
ENSG00000261204	AC004449.6		2.00824	8.45905e-09
ENSG00000237416	RP11-465K1.2		1.70113	0.00178415
ENSG00000214108	CTD-2206G10.1		1.66966	0.00090038
ENSG00000234636	MED14-AS1	MED14 antisense RNA 1	1.53134	2.68882e-21
ENSG00000004948	CALCR	calcitonin receptor	2.02298	3.51297e-05
ENSG00000264451	RP11-433M22.2		2.23822	6.55346e-18
ENSG00000176261	ZBTB8OS	zinc finger and BTB domain containing 8 opposite strand	1.18018	2.03317e-167
ENSG00000253227	RP11-383J24.1		1.19196	0.000500013
ENSG00000261366	RP13-44L19.2		1.54674	4.73052e-14
ENSG00000162188	GNG3	guanine nucleotide binding protein (G protein), gamma 3	2.6513	4.12242e-30
ENSG00000261584	RP11-457M11.5		1.49788	2.66537e-12
ENSG00000090382	LYZ	lysozyme	3.2255	3.77797e-28
ENSG00000228636	RP5-1051H14.2		3.06826	3.51479e-12
ENSG00000232891	RP11-136K14.1		1.19816	0.0443457
ENSG00000235669	AC004593.3		1.5851	0.00376704
ENSG00000137709	POU2F3	POU class 2 homeobox 3	1.6198	0.000392079
ENSG00000259746	CTD-3065B20.1		2.01	8.74298e-06
ENSG00000230786	AL161645.1	Uncharacterized protein	2.38292	2.96538e-21
ENSG00000230537	RP11-305L7.1		1.04903	0.0197941
ENSG00000170373	CST1	cystatin SN	2.06045	7.31932e-06
ENSG00000142347	MYO1F	myosin IF	2.00146	2.69342e-14
ENSG00000053372	MRTO4	mRNA turnover 4 homolog (S. cerevisiae)	1.13839	4.92454e-223
ENSG00000229375	USP24P1	ubiquitin specific peptidase 24 pseudogene 1	1.21871	0.0398607
ENSG00000249226	SUCLG2P4	succinate-CoA ligase, GDP-forming, beta subunit pseudogene 4	1.55521	0.00324236
ENSG00000117215	PLA2G2D	phospholipase A2, group IID	4.21578	2.20424e-32
ENSG00000249236	CTD-2227I18.1		2.92016	5.27089e-18
ENSG00000228527	RP11-179B15.5		2.02947	0.000222807
ENSG00000260898	ADPGK-AS1	ADPGK antisense RNA 1	1.27103	0.0282088
ENSG00000235167	RP11-425M5.5		1.77116	2.22467e-10
[truncated: 3,428 more rows]

## Sheet: 501M_shMITF_Down-List
Ensembl gene id	Gene name	Description	Average log2 change (shMITF/shControl)	Adjusted p-value
ENSG00000003989	SLC7A2	solute carrier family 7 (cationic amino acid transporter, y+ system), member 2	-1.4043	2.37217e-10
ENSG00000004660	CAMKK1	calcium/calmodulin-dependent protein kinase kinase 1, alpha	-1.47401	0.000440061
ENSG00000004846	ABCB5	ATP-binding cassette, sub-family B (MDR/TAP), member 5	-2.16273	7.39108e-25
ENSG00000005513	SOX8	SRY (sex determining region Y)-box 8	-1.29778	1.67622e-06
ENSG00000005810	MYCBP2	MYC binding protein 2, E3 ubiquitin protein ligase	-1.16657	3.45336e-09
ENSG00000006607	FARP2	FERM, RhoGEF and pleckstrin domain protein 2	-1.33178	2.31379e-12
ENSG00000007237	GAS7	growth arrest-specific 7	-1.49518	8.65476e-09
ENSG00000008118	CAMK1G	calcium/calmodulin-dependent protein kinase IG	-1.90287	2.68064e-05
ENSG00000008405	CRY1	cryptochrome 1 (photolyase-like)	-1.05764	0.000254556
ENSG00000009844	VTA1	Vps20-associated 1 homolog (S. cerevisiae)	-1.07252	1.26681e-08
ENSG00000010818	HIVEP2	human immunodeficiency virus type I enhancer binding protein 2	-1.04295	7.13303e-07
ENSG00000011114	BTBD7	BTB (POZ) domain containing 7	-1.00313	9.09698e-06
ENSG00000011426	ANLN	anillin, actin binding protein	-1.26098	1.17136e-11
ENSG00000012211	PRICKLE3	prickle homolog 3 (Drosophila)	-1.13708	6.67727e-08
ENSG00000015413	DPEP1	dipeptidase 1 (renal)	-2.44386	2.10411e-05
ENSG00000017427	IGF1	insulin-like growth factor 1 (somatomedin C)	-1.5487	0.00310262
ENSG00000019505	SYT13	synaptotagmin XIII	-1.55455	0.0395947
ENSG00000019549	SNAI2	snail homolog 2 (Drosophila)	-1.22083	0.010074
ENSG00000023697	DERA	deoxyribose-phosphate aldolase (putative)	-1.20298	3.98712e-10
ENSG00000031081	ARHGAP31	Rho GTPase activating protein 31	-1.07836	4.36907e-07
ENSG00000033327	GAB2	GRB2-associated binding protein 2	-1.19814	1.43725e-09
ENSG00000039319	ZFYVE16	zinc finger, FYVE domain containing 16	-1.32148	6.37818e-08
ENSG00000047621	C12orf4	chromosome 12 open reading frame 4	-1.0733	1.5338e-07
ENSG00000049246	PER3	period homolog 3 (Drosophila)	-2.2091	3.98464e-20
ENSG00000050555	LAMC3	laminin, gamma 3	-1.59394	3.04696e-12
ENSG00000051341	POLQ	polymerase (DNA directed), theta	-1.16329	1.74234e-08
ENSG00000053108	FSTL4	follistatin-like 4	-1.48696	0.00336146
ENSG00000053254	FOXN3	forkhead box N3	-1.3219	8.68852e-08
ENSG00000053501	USE1	unconventional SNARE in the ER 1 homolog (S. cerevisiae)	-1.1076	9.56313e-09
ENSG00000057704	TMCC3	transmembrane and coiled-coil domain family 3	-3.06086	2.78916e-15
ENSG00000059377	TBXAS1	thromboxane A synthase 1 (platelet)	-1.13513	0.00070706
ENSG00000064393	HIPK2	homeodomain interacting protein kinase 2	-1.88598	2.09373e-18
ENSG00000065060	UHRF1BP1	UHRF1 binding protein 1	-1.04316	9.2228e-08
ENSG00000065328	MCM10	minichromosome maintenance complex component 10	-1.0819	2.15253e-08
ENSG00000065361	ERBB3	v-erb-b2 erythroblastic leukemia viral oncogene homolog 3 (avian)	-1.17148	0.000781268
ENSG00000065413	ANKRD44	ankyrin repeat domain 44	-1.00692	1.5139e-06
ENSG00000065534	MYLK	myosin light chain kinase	-1.1047	7.64261e-06
ENSG00000066279	ASPM	asp (abnormal spindle) homolog, microcephaly associated (Drosophila)	-1.04477	5.07021e-06
ENSG00000067842	ATP2B3	ATPase, Ca++ transporting, plasma membrane 3	-1.58189	0.0294706
ENSG00000069020	MAST4	microtubule associated serine/threonine kinase family member 4	-1.25575	0.00218671
ENSG00000069275	NUCKS1	nuclear casein kinase and cyclin-dependent kinase substrate 1	-1.24297	7.02106e-11
ENSG00000069424	KCNAB2	potassium voltage-gated channel, shaker-related subfamily, beta member 2	-1.55084	3.84799e-11
ENSG00000069974	RAB27A	RAB27A, member RAS oncogene family	-1.30312	1.72778e-11
ENSG00000070159	PTPN3	protein tyrosine phosphatase, non-receptor type 3	-1.39352	7.69537e-05
ENSG00000072571	HMMR	hyaluronan-mediated motility receptor (RHAMM)	-1.34657	1.88877e-12
ENSG00000072694	FCGR2B	Fc fragment of IgG, low affinity IIb, receptor (CD32)	-1.8474	4.34303e-06
ENSG00000073849	ST6GAL1	ST6 beta-galactosamide alpha-2,6-sialyltranferase 1	-1.41174	3.42138e-08
ENSG00000074317	SNCB	synuclein, beta	-2.34033	2.70093e-15
ENSG00000075340	ADD2	adducin 2 (beta)	-1.21272	4.77704e-08
ENSG00000075673	ATP12A	ATPase, H+/K+ transporting, nongastric, alpha polypeptide	-1.85388	0.00592634
ENSG00000076003	MCM6	minichromosome maintenance complex component 6	-1.5165	3.07368e-16
ENSG00000076356	PLXNA2	plexin A2	-1.2457	5.85263e-07
ENSG00000076716	GPC4	glypican 4	-1.27827	8.29233e-05
ENSG00000077238	IL4R	interleukin 4 receptor	-1.3028	0.000278858
ENSG00000078177	N4BP2	NEDD4 binding protein 2	-1.19606	3.00354e-08
ENSG00000078237	C12orf5	chromosome 12 open reading frame 5	-1.35363	2.19821e-09
ENSG00000079308	TNS1	tensin 1	-2.94087	3.62827e-14
ENSG00000079385	CEACAM1	carcinoembryonic antigen-related cell adhesion molecule 1 (biliary glycoprotein)	-1.16314	0.00569274
ENSG00000080166	DCT	dopachrome tautomerase (dopachrome delta-isomerase, tyrosine-related protein 2)	-2.71291	8.80372e-33
ENSG00000080511	RDH8	retinol dehydrogenase 8 (all-trans)	-2.67834	6.4324e-09
ENSG00000080644	CHRNA3	cholinergic receptor, nicotinic, alpha 3 (neuronal)	-1.06039	0.0307143
ENSG00000082213	C5orf22	chromosome 5 open reading frame 22	-1.33954	4.44784e-07
ENSG00000082293	COL19A1	collagen, type XIX, alpha 1	-1.14247	0.00505243
ENSG00000083544	TDRD3	tudor domain containing 3	-1.9675	1.70907e-24
ENSG00000085449	WDFY1	WD repeat and FYVE domain containing 1	-1.07653	5.56229e-09
ENSG00000085831	TTC39A	tetratricopeptide repeat domain 39A	-1.26699	4.80569e-09
ENSG00000085840	ORC1	origin recognition complex, subunit 1	-1.05967	3.64983e-06
ENSG00000086159	AQP6	aquaporin 6, kidney specific	-3.33159	6.42094e-27
ENSG00000086717	PPEF1	protein phosphatase, EF-hand calcium binding domain 1	-1.66506	6.87548e-10
ENSG00000087495	PHACTR3	phosphatase and actin regulator 3	-1.494	0.0494538
ENSG00000087586	AURKA	aurora kinase A	-1.14164	5.69325e-07
ENSG00000088756	ARHGAP28	Rho GTPase activating protein 28	-1.35698	1.907e-06
ENSG00000089041	P2RX7	purinergic receptor P2X, ligand-gated ion channel, 7	-1.00489	0.00227848
ENSG00000089101	C20orf26	chromosome 20 open reading frame 26	-3.49423	5.09639e-46
ENSG00000089356	FXYD3	FXYD domain containing ion transport regulator 3	-1.26821	0.0127851
ENSG00000090889	KIF4A	kinesin family member 4A	-1.2442	1.41558e-11
ENSG00000091490	SEL1L3	sel-1 suppressor of lin-12-like 3 (C. elegans)	-1.0751	1.93988e-06
ENSG00000091844	RGS17	regulator of G-protein signaling 17	-1.63297	6.16007e-07
ENSG00000092421	SEMA6A	sema domain, transmembrane domain (TM), and cytoplasmic domain, (semaphorin) 6A	-1.1357	0.000137785
ENSG00000092529	CAPN3	calpain 3, (p94)	-1.5642	1.04718e-13
ENSG00000092853	CLSPN	claspin	-1.34116	2.91004e-12
ENSG00000092969	TGFB2	transforming growth factor, beta 2	-4.06418	1.13372e-22
ENSG00000094755	GABRP	gamma-aminobutyric acid (GABA) A receptor, pi	-1.40881	8.04395e-08
ENSG00000100077	ADRBK2	adrenergic, beta, receptor kinase 2	-2.262	2.48081e-29
ENSG00000100092	SH3BP1	SH3-domain binding protein 1	-1.31517	4.0112e-10
ENSG00000100097	LGALS1	lectin, galactoside-binding, soluble, 1	-1.3967	0.000221645
ENSG00000100104	SRRD	SRR1 domain containing	-1.27185	1.31299e-10
ENSG00000100191	SLC5A4	solute carrier family 5 (low affinity glucose cotransporter), member 4	-3.59943	1.3491e-25
ENSG00000100479	POLE2	polymerase (DNA directed), epsilon 2, accessory subunit	-1.13817	3.2898e-06
ENSG00000100505	TRIM9	tripartite motif containing 9	-1.32702	4.07183e-07
ENSG00000100592	DAAM1	dishevelled associated activator of morphogenesis 1	-1.2257	1.59687e-10
ENSG00000100604	CHGA	chromogranin A (parathyroid secretory protein 1)	-1.48401	0.0443297
ENSG00000100629	CEP128	centrosomal protein 128kDa	-1.52811	7.29635e-12
ENSG00000100784	RPS6KA5	ribosomal protein S6 kinase, 90kDa, polypeptide 5	-1.07006	0.00585519
ENSG00000100867	DHRS2	dehydrogenase/reductase (SDR family) member 2	-1.38544	0.000710735
ENSG00000101000	PROCR	protein C receptor, endothelial	-1.58388	9.72843e-07
ENSG00000101040	ZMYND8	zinc finger, MYND-type containing 8	-1.04977	3.17032e-07
ENSG00000101197	BIRC7	baculoviral IAP repeat containing 7	-1.56645	6.74428e-17
ENSG00000101198	NKAIN4	Na+/K+ transporting ATPase interacting 4	-1.72544	1.57354e-07
ENSG00000101384	JAG1	jagged 1	-1.00304	1.40364e-06
ENSG00000101440	ASIP	agouti signaling protein	-2.15103	0.000197802
ENSG00000101447	FAM83D	family with sequence similarity 83, member D	-1.40967	2.18896e-12
ENSG00000102003	SYP	synaptophysin	-1.46645	4.49242e-12
ENSG00000102466	FGF14	fibroblast growth factor 14	-1.74624	0.00997811
ENSG00000102753	KPNA3	karyopherin alpha 3 (importin alpha 4)	-1.12608	2.1418e-08
ENSG00000102934	PLLP	plasmolipin	-2.17098	1.09339e-05
ENSG00000103253	HAGHL	hydroxyacylglutathione hydrolase-like	-1.21781	7.95214e-06
ENSG00000103355	PRSS33	protease, serine, 33	-1.81037	0.00613931
ENSG00000104093	DMXL2	Dmx-like 2	-1.01112	1.25976e-06
ENSG00000104112	SCG3	secretogranin III	-1.45654	0.00790387
ENSG00000104765	BNIP3L	BCL2/adenovirus E1B 19kDa interacting protein 3-like	-1.35919	1.40499e-11
ENSG00000105186	ANKRD27	ankyrin repeat domain 27 (VPS9 domain)	-1.02622	1.14589e-05
ENSG00000105409	ATP1A3	ATPase, Na+/K+ transporting, alpha 3 polypeptide	-1.49425	0.0199574
ENSG00000105679	GAPDHS	glyceraldehyde-3-phosphate dehydrogenase, spermatogenic	-2.0431	6.64515e-05
ENSG00000105976	MET	met proto-oncogene (hepatocyte growth factor receptor)	-1.27405	2.93865e-10
ENSG00000107317	PTGDS	prostaglandin D2 synthase 21kDa (brain)	-1.88641	0.00728039
ENSG00000107338	SHB	Src homology 2 domain containing adaptor protein B	-1.58186	2.53402e-07
ENSG00000107614	TRDMT1	tRNA aspartic acid methyltransferase 1	-1.09635	4.92777e-05
ENSG00000107719	PALD1	phosphatase domain containing, paladin 1	-1.0453	0.000326193
ENSG00000108424	KPNB1	karyopherin (importin) beta 1	-1.28534	2.79472e-10
ENSG00000108849	PPY	pancreatic polypeptide	-2.24377	9.4298e-09
ENSG00000109819	PPARGC1A	peroxisome proliferator-activated receptor gamma, coactivator 1 alpha	-1.67611	1.07205e-15
ENSG00000109956	B3GAT1	beta-1,3-glucuronyltransferase 1 (glucuronosyltransferase P)	-1.68725	8.37324e-10
ENSG00000110092	CCND1	cyclin D1	-1.1557	2.55337e-06
ENSG00000110693	SOX6	SRY (sex determining region Y)-box 6	-1.16905	0.000186779
ENSG00000111077	TENC1	tensin like C1 domain containing phosphatase (tensin 2)	-1.00849	0.000138135
ENSG00000111247	RAD51AP1	RAD51 associated protein 1	-1.0187	2.29495e-06
ENSG00000111674	ENO2	enolase 2 (gamma, neuronal)	-1.37133	6.18525e-07
ENSG00000111799	COL12A1	collagen, type XII, alpha 1	-1.72575	0.00954078
ENSG00000111846	GCNT2	glucosaminyl (N-acetyl) transferase 2, I-branching enzyme (I blood group)	-1.16092	0.000709076
ENSG00000112139	MDGA1	MAM domain containing glycosylphosphatidylinositol anchor 1	-1.53593	5.44322e-10
ENSG00000112183	RBM24	RNA binding motif protein 24	-1.59746	0.0027358
ENSG00000112280	COL9A1	collagen, type IX, alpha 1	-1.70089	8.65476e-09
ENSG00000112561	TFEB	transcription factor EB	-2.49175	1.14091e-32
ENSG00000112964	GHR	growth hormone receptor	-2.05832	2.40252e-14
ENSG00000112984	KIF20A	kinesin family member 20A	-1.27223	6.51842e-12
ENSG00000113263	ITK	IL2-inducible T-cell kinase	-1.79208	5.0983e-05
ENSG00000113494	PRLR	prolactin receptor	-1.89592	0.0002032
ENSG00000114315	HES1	hairy and enhancer of split 1, (Drosophila)	-1.74682	8.47115e-08
ENSG00000114455	HHLA2	HERV-H LTR-associating 2	-1.04032	0.0153717
ENSG00000114487	MORC1	MORC family CW-type zinc finger 1	-1.87138	1.21787e-10
ENSG00000114541	FRMD4B	FERM domain containing 4B	-1.82021	1.08986e-19
ENSG00000115159	GPD2	glycerol-3-phosphate dehydrogenase 2 (mitochondrial)	-1.25754	5.37403e-07
ENSG00000115339	GALNT3	UDP-N-acetyl-alpha-D-galactosamine:polypeptide N-acetylgalactosaminyltransferase 3 (GalNAc-T3)	-1.54115	0.000288828
ENSG00000115896	PLCL1	phospholipase C-like 1	-1.45932	0.037577
ENSG00000116704	SLC35D1	solute carrier family 35 (UDP-glucuronic acid/UDP-N-acetylgalactosamine dual transporter), member D1	-1.09597	1.39413e-07
ENSG00000116833	NR5A2	nuclear receptor subfamily 5, group A, member 2	-1.43557	0.000917728
ENSG00000116983	HPCAL4	hippocalcin like 4	-2.06056	7.38695e-11
ENSG00000116991	SIPA1L2	signal-induced proliferation-associated 1 like 2	-1.09392	2.7336e-07
ENSG00000117114	LPHN2	latrophilin 2	-1.09165	0.0124225
ENSG00000117122	MFAP2	microfibrillar-associated protein 2	-1.76583	0.000200348
ENSG00000117148	ACTL8	actin-like 8	-1.30252	0.0423159
ENSG00000117155	SSX2IP	synovial sarcoma, X breakpoint 2 interacting protein	-1.75194	3.52945e-19
ENSG00000117724	CENPF	centromere protein F, 350/400kDa (mitosin)	-1.05134	9.19857e-09
ENSG00000117834	SLC5A9	solute carrier family 5 (sodium/glucose cotransporter), member 9	-1.58603	0.00597596
ENSG00000117862	TXNDC12	thioredoxin domain containing 12 (endoplasmic reticulum)	-1.13438	4.96479e-06
ENSG00000118113	MMP8	matrix metallopeptidase 8 (neutrophil collagenase)	-1.7574	0.0011683
ENSG00000118246	FASTKD2	FAST kinase domains 2	-1.07233	1.61288e-05
ENSG00000118513	MYB	v-myb myeloblastosis viral oncogene homolog (avian)	-1.01182	0.00249015
ENSG00000119048	UBE2B	ubiquitin-conjugating enzyme E2B	-1.04525	1.13313e-07
ENSG00000119121	TRPM6	transient receptor potential cation channel, subfamily M, member 6	-1.45362	0.0034943
ENSG00000119314	PTBP3	polypyrimidine tract binding protein 3	-1.43447	3.30257e-07
ENSG00000119326	CTNNAL1	catenin (cadherin-associated protein), alpha-like 1	-1.06615	3.5299e-08
ENSG00000119514	GALNT12	UDP-N-acetyl-alpha-D-galactosamine:polypeptide N-acetylgalactosaminyltransferase 12 (GalNAc-T12)	-1.45243	0.00351905
ENSG00000120049	KCNIP2	Kv channel interacting protein 2	-1.33135	4.30006e-06
ENSG00000120217	CD274	CD274 molecule	-1.03156	0.032334
ENSG00000120539	MASTL	microtubule associated serine/threonine kinase-like	-1.53732	1.51288e-14
ENSG00000120738	EGR1	early growth response 1	-1.66694	3.59707e-05
ENSG00000121152	NCAPH	non-SMC condensin I complex, subunit H	-1.01498	1.59508e-06
ENSG00000121207	LRAT	lecithin retinol acyltransferase (phosphatidylcholine--retinol O-acyltransferase)	-1.55091	0.00115838
ENSG00000121390	PSPC1	paraspeckle component 1	-1.00373	4.28301e-06
ENSG00000121743	GJA3	gap junction protein, alpha 3, 46kDa	-1.11558	0.00285355
ENSG00000122133	PAEP	progestagen-associated endometrial protein	-2.40488	4.61108e-09
ENSG00000122367	LDB3	LIM domain binding 3	-2.64296	2.90655e-45
ENSG00000122547	EEPD1	endonuclease/exonuclease/phosphatase family domain containing 1	-1.42132	4.80275e-06
ENSG00000122756	CNTFR	ciliary neurotrophic factor receptor	-1.23698	0.00289138
ENSG00000122877	EGR2	early growth response 2	-1.78491	7.02294e-09
ENSG00000122966	CIT	citron (rho-interacting, serine/threonine kinase 21)	-1.75178	3.06612e-17
ENSG00000123095	BHLHE41	basic helix-loop-helix family, member e41	-1.22046	3.5252e-11
ENSG00000123364	HOXC13	homeobox C13	-1.20604	0.000434869
ENSG00000123374	CDK2	cyclin-dependent kinase 2	-1.01897	3.05792e-08
ENSG00000123485	HJURP	Holliday junction recognition protein	-1.28898	2.18155e-06
ENSG00000123560	PLP1	proteolipid protein 1	-1.11008	0.000334065
ENSG00000123983	ACSL3	acyl-CoA synthetase long-chain family member 3	-1.11642	2.63856e-08
ENSG00000124120	TTPAL	tocopherol (alpha) transfer protein-like	-1.15279	8.99244e-09
ENSG00000124496	TRERF1	transcriptional regulating factor 1	-2.04771	6.34851e-06
ENSG00000124818	OPN5	opsin 5	-2.45976	1.72317e-14
ENSG00000124900	TRIM51	tripartite motif-containing 51	-1.32795	0.000596021
ENSG00000125355	FAM70A	family with sequence similarity 70, member A	-1.34758	0.00334234
ENSG00000125414	MYH2	myosin, heavy chain 2, skeletal muscle, adult	-1.16363	0.0124057
ENSG00000125827	TMX4	thioredoxin-related transmembrane protein 4	-1.03231	0.000686441
ENSG00000126856	PRDM7	PR domain containing 7	-4.55315	6.65419e-107
ENSG00000126882	FAM78A	family with sequence similarity 78, member A	-1.05722	1.36512e-06
ENSG00000127311	HELB	helicase (DNA) B	-1.15594	0.00228923
ENSG00000128253	RFPL2	ret finger protein-like 2	-1.16449	0.0335585
ENSG00000128564	VGF	VGF nerve growth factor inducible	-2.16516	7.16513e-07
ENSG00000128918	ALDH1A2	aldehyde dehydrogenase 1 family, member A2	-1.45812	0.0197447
ENSG00000128923	FAM63B	family with sequence similarity 63, member B	-1.56939	8.88681e-09
ENSG00000129173	E2F8	E2F transcription factor 8	-1.65297	1.34805e-09
ENSG00000129990	SYT5	synaptotagmin V	-1.3987	0.000233346
ENSG00000130038	EFCAB4B	EF-hand calcium binding domain 4B	-1.25558	2.87437e-05
ENSG00000130203	APOE	apolipoprotein E	-1.04743	0.00329101
ENSG00000130208	APOC1	apolipoprotein C-I	-2.25452	9.82837e-24
ENSG00000131409	LRRC4B	leucine rich repeat containing 4B	-1.80092	9.98952e-06
ENSG00000131969	ABHD12B	abhydrolase domain containing 12B	-1.43038	3.17006e-06
ENSG00000132326	PER2	period homolog 2 (Drosophila)	-1.15508	0.00272582
ENSG00000132383	RPA1	replication protein A1, 70kDa	-1.05275	1.24404e-07
ENSG00000132436	FIGNL1	fidgetin-like 1	-1.00729	1.6495e-07
ENSG00000132639	SNAP25	synaptosomal-associated protein, 25kDa	-1.2661	0.00471104
ENSG00000132692	BCAN	brevican	-1.8596	3.59333e-21
ENSG00000132773	TOE1	target of EGR1, member 1 (nuclear)	-1.03111	7.13976e-05
ENSG00000133026	MYH10	myosin, heavy chain 10, non-muscle	-1.1281	4.45537e-10
ENSG00000133195	SLC39A11	solute carrier family 39 (metal ion transporter), member 11	-1.3146	2.40958e-09
ENSG00000133636	NTS	neurotensin	-2.39401	1.20842e-07
ENSG00000133657	ATP13A3	ATPase type 13A3	-1.03751	7.78314e-07
ENSG00000133789	SWAP70	SWAP switching B-cell complex 70kDa subunit	-1.17794	1.10248e-09
ENSG00000133863	TEX15	testis expressed 15	-1.7791	1.97875e-09
ENSG00000133874	RNF122	ring finger protein 122	-1.00097	0.0135981
ENSG00000134138	MEIS2	Meis homeobox 2	-1.21196	8.25944e-10
ENSG00000134160	TRPM1	transient receptor potential cation channel, subfamily M, member 1	-1.49567	7.31887e-17
ENSG00000134333	LDHA	lactate dehydrogenase A	-1.05611	1.76167e-06
ENSG00000134369	NAV1	neuron navigator 1	-1.80507	6.23043e-17
ENSG00000134531	EMP1	epithelial membrane protein 1	-1.63394	7.29329e-13
ENSG00000134802	SLC43A3	solute carrier family 43, member 3	-1.48995	1.4223e-09
ENSG00000134954	ETS1	v-ets erythroblastosis virus E26 oncogene homolog 1 (avian)	-1.35874	6.87798e-06
ENSG00000134955	SLC37A2	solute carrier family 37 (glycerol-3-phosphate transporter), member 2	-1.29596	3.1798e-07
ENSG00000134982	APC	adenomatous polyposis coli	-1.2682	3.5178e-08
ENSG00000135090	TAOK3	TAO kinase 3	-1.00843	2.70257e-07
ENSG00000135409	AMHR2	anti-Mullerian hormone receptor, type II	-1.7142	0.0174359
ENSG00000135424	ITGA7	integrin, alpha 7	-1.43312	1.06616e-05
ENSG00000135905	DOCK10	dedicator of cytokinesis 10	-1.09354	2.1037e-08
ENSG00000135913	USP37	ubiquitin specific peptidase 37	-1.10963	8.98626e-08
ENSG00000135973	GPR45	G protein-coupled receptor 45	-1.16864	0.0402991
ENSG00000136141	LRCH1	leucine-rich repeats and calponin homology (CH) domain containing 1	-1.16623	2.06785e-07
ENSG00000136205	TNS3	tensin 3	-1.25973	0.000233736
ENSG00000136237	RAPGEF5	Rap guanine nucleotide exchange factor (GEF) 5	-1.9703	1.38357e-14
ENSG00000136275	C7orf69	chromosome 7 open reading frame 69	-1.73693	0.0150938
ENSG00000136574	GATA4	GATA binding protein 4	-1.45855	5.33801e-12
ENSG00000136732	GYPC	glycophorin C (Gerbich blood group)	-1.25061	2.28619e-06
ENSG00000136943	CTSL2	cathepsin L2	-1.16136	1.95136e-06
ENSG00000137135	ARHGEF39	Rho guanine nucleotide exchange factor (GEF) 39	-1.04145	0.000230643
ENSG00000137558	PI15	peptidase inhibitor 15	-1.50158	8.13724e-12
ENSG00000137770	CTDSPL2	CTD (carboxy-terminal domain, RNA polymerase II, polypeptide A) small phosphatase like 2	-1.44568	9.61489e-11
ENSG00000137812	CASC5	cancer susceptibility candidate 5	-1.35445	4.67087e-10
ENSG00000137814	HAUS2	HAUS augmin-like complex, subunit 2	-1.02907	9.043e-07
ENSG00000137841	PLCB2	phospholipase C, beta 2	-2.43502	3.94284e-14
ENSG00000137869	CYP19A1	cytochrome P450, family 19, subfamily A, polypeptide 1	-1.63073	8.29387e-10
ENSG00000138101	DTNB	dystrobrevin, beta	-1.08797	1.98377e-05
ENSG00000138376	BARD1	BRCA1 associated RING domain 1	-1.22769	3.36775e-07
ENSG00000138623	SEMA7A	semaphorin 7A, GPI membrane anchor (John Milton Hagen blood group)	-1.37457	1.12444e-09
ENSG00000138750	NUP54	nucleoporin 54kDa	-1.38105	3.08644e-11
ENSG00000139436	GIT2	G protein-coupled receptor kinase interacting ArfGAP 2	-1.20168	6.98233e-09
ENSG00000139496	NUPL1	nucleoporin like 1	-1.6791	2.31237e-21
ENSG00000139618	BRCA2	breast cancer 2, early onset	-1.13586	8.91285e-07
ENSG00000139826	ABHD13	abhydrolase domain containing 13	-1.23749	2.4513e-09
ENSG00000140379	BCL2A1	BCL2-related protein A1	-1.14541	2.13965e-05
ENSG00000140511	HAPLN3	hyaluronan and proteoglycan link protein 3	-1.09466	0.00966352
ENSG00000140678	ITGAX	integrin, alpha X (complement component 3 receptor 4 subunit)	-2.17457	6.04152e-05
ENSG00000140795	MYLK3	myosin light chain kinase 3	-1.20967	7.23011e-06
ENSG00000141384	TAF4B	TAF4b RNA polymerase II, TATA box binding protein (TBP)-associated factor, 105kDa	-1.01179	0.000917765
ENSG00000141446	ESCO1	establishment of cohesion 1 homolog 1 (S. cerevisiae)	-1.0604	5.13676e-07
ENSG00000141449	GREB1L	growth regulation by estrogen in breast cancer-like	-1.00068	0.0365818
ENSG00000141540	TTYH2	tweety homolog 2 (Drosophila)	-1.126	3.87153e-05
ENSG00000142173	COL6A2	collagen, type VI, alpha 2	-1.15025	0.00134298
ENSG00000143171	RXRG	retinoid X receptor, gamma	-1.63402	2.19135e-09
ENSG00000143226	FCGR2A	Fc fragment of IgG, low affinity IIa, receptor (CD32)	-1.63405	3.56325e-06
ENSG00000143369	ECM1	extracellular matrix protein 1	-2.64584	6.01234e-47
ENSG00000143416	SELENBP1	selenium binding protein 1	-1.77387	1.5408e-14
ENSG00000143627	PKLR	pyruvate kinase, liver and RBC	-1.1705	0.000686834
ENSG00000143641	GALNT2	UDP-N-acetyl-alpha-D-galactosamine:polypeptide N-acetylgalactosaminyltransferase 2 (GalNAc-T2)	-1.07613	1.09012e-08
ENSG00000143786	CNIH3	cornichon homolog 3 (Drosophila)	-1.24793	0.0034378
ENSG00000143815	LBR	lamin B receptor	-1.31545	1.97638e-12
ENSG00000143847	PPFIA4	protein tyrosine phosphatase, receptor type, f polypeptide (PTPRF), interacting protein (liprin), alpha 4	-1.54976	2.30373e-06
ENSG00000143924	EML4	echinoderm microtubule associated protein like 4	-1.20364	3.14963e-10
ENSG00000144136	SLC20A1	solute carrier family 20 (phosphate transporter), member 1	-1.05357	6.4413e-08
ENSG00000144645	OSBPL10	oxysterol binding protein-like 10	-2.34914	4.52946e-25
ENSG00000144681	STAC	SH3 and cysteine rich domain	-2.32906	0.000256676
ENSG00000144802	NFKBIZ	nuclear factor of kappa light polypeptide gene enhancer in B-cells inhibitor, zeta	-1.07292	2.28285e-07
ENSG00000145040	UCN2	urocortin 2	-2.75355	1.17656e-11
ENSG00000145107	TM4SF19	transmembrane 4 L six family member 19	-1.80651	1.1093e-20
ENSG00000145832	SLC25A48	solute carrier family 25, member 48	-1.68452	0.000590062
ENSG00000145911	N4BP3	NEDD4 binding protein 3	-1.51655	0.0114175
ENSG00000146094	DOK3	docking protein 3	-1.41963	7.75099e-10
ENSG00000146476	C6orf211	chromosome 6 open reading frame 211	-1.00221	8.40876e-06
ENSG00000147509	RGS20	regulator of G-protein signaling 20	-1.02008	2.70257e-07
ENSG00000147586	MRPS28	mitochondrial ribosomal protein S28	-1.28667	1.14805e-09
ENSG00000147862	NFIB	nuclear factor I/B	-1.0118	0.0162022
ENSG00000148175	STOM	stomatin	-1.13611	5.76843e-09
ENSG00000148288	GBGT1	globoside alpha-1,3-N-acetylgalactosaminyltransferase 1	-1.70737	1.13003e-06
ENSG00000148773	MKI67	antigen identified by monoclonal antibody Ki-67	-1.03064	5.5282e-07
ENSG00000148925	BTBD10	BTB (POZ) domain containing 10	-1.31139	5.97568e-13
ENSG00000149485	FADS1	fatty acid desaturase 1	-1.16998	2.23907e-10
ENSG00000149503	INCENP	inner centromere protein antigens 135/155kDa	-1.01985	8.42662e-05
ENSG00000150086	GRIN2B	glutamate receptor, ionotropic, N-methyl D-aspartate 2B	-1.51815	0.0468458
ENSG00000150656	CNDP1	carnosine dipeptidase 1 (metallopeptidase M20 family)	-1.35246	1.66206e-06
ENSG00000150893	FREM2	FRAS1 related extracellular matrix protein 2	-1.20648	0.000422315
ENSG00000151025	GPR158	G protein-coupled receptor 158	-1.14722	1.26236e-08
ENSG00000151287	TEX30	testis expressed 30	-1.17238	3.91173e-09
ENSG00000151303	AGAP11	ankyrin repeat and GTPase domain Arf GTPase activating protein 11	-1.14025	0.00689822
ENSG00000151725	MLF1IP	MLF1 interacting protein	-1.13911	1.27044e-08
ENSG00000152078	TMEM56	transmembrane protein 56	-1.10166	4.75475e-07
ENSG00000152270	PDE3B	phosphodiesterase 3B, cGMP-inhibited	-1.30338	4.04615e-10
ENSG00000152580	IGSF10	immunoglobulin superfamily, member 10	-1.13317	0.00358608
ENSG00000152582	SPEF2	sperm flagellar 2	-1.2389	0.00120687
ENSG00000153207	AHCTF1	AT hook containing transcription factor 1	-1.08948	5.88383e-06
ENSG00000153253	SCN3A	sodium channel, voltage-gated, type III, alpha subunit	-1.42387	0.0378281
ENSG00000153317	ASAP1	ArfGAP with SH3 domain, ankyrin repeat and PH domain 1	-1.0891	1.5284e-08
ENSG00000153561	RMND5A	required for meiotic nuclear division 5 homolog A (S. cerevisiae)	-1.35944	8.07338e-14
ENSG00000153922	CHD1	chromodomain helicase DNA binding protein 1	-1.26383	5.28726e-07
ENSG00000154025	SLC5A10	solute carrier family 5 (sodium/glucose cotransporter), member 10	-2.23807	1.26493e-05
ENSG00000154258	ABCA9	ATP-binding cassette, sub-family A (ABC1), member 9	-1.58322	0.00408596
ENSG00000154608	CEP170P1	centrosomal protein 170kDa pseudogene 1	-2.45526	1.56555e-09
ENSG00000155158	TTC39B	tetratricopeptide repeat domain 39B	-1.16472	3.93376e-05
ENSG00000155846	PPARGC1B	peroxisome proliferator-activated receptor gamma, coactivator 1 beta	-1.14489	2.56564e-07
ENSG00000156011	PSD3	pleckstrin and Sec7 domain containing 3	-1.14229	5.71566e-07
ENSG00000156017	C9orf41	chromosome 9 open reading frame 41	-1.08045	1.34329e-06
ENSG00000156299	TIAM1	T-cell lymphoma invasion and metastasis 1	-1.25932	0.0463726
ENSG00000157045	NTAN1	N-terminal asparagine amidase	-1.21313	2.85499e-06
ENSG00000157388	CACNA1D	calcium channel, voltage-dependent, L type, alpha 1D subunit	-1.87386	3.71028e-06
ENSG00000157483	MYO1E	myosin IE	-1.3101	9.15482e-13
ENSG00000158022	TRIM63	tripartite motif containing 63, E3 ubiquitin protein ligase	-1.79146	4.54361e-09
ENSG00000158555	GDPD5	glycerophosphodiester phosphodiesterase domain containing 5	-1.47859	3.34023e-15
ENSG00000158683	PKD1L1	polycystic kidney disease 1 like 1	-2.42549	1.51288e-14
ENSG00000158859	ADAMTS4	ADAM metallopeptidase with thrombospondin type 1 motif, 4	-1.30817	0.00729926
ENSG00000158887	MPZ	myelin protein zero	-1.12216	0.0473857
ENSG00000159111	MRPL10	mitochondrial ribosomal protein L10	-1.04663	2.57006e-07
ENSG00000159231	CBR3	carbonyl reductase 3	-1.17277	7.16861e-07
ENSG00000159399	HK2	hexokinase 2	-1.25583	1.42882e-08
ENSG00000159403	C1R	complement component 1, r subcomponent	-1.26661	0.00142443
ENSG00000159685	CHCHD6	coiled-coil-helix-coiled-coil-helix domain containing 6	-1.28779	2.24698e-08
ENSG00000160678	S100A1	S100 calcium binding protein A1	-1.00234	6.28644e-05
ENSG00000160716	CHRNB2	cholinergic receptor, nicotinic, beta 2 (neuronal)	-1.21417	0.00233716
ENSG00000161544	CYGB	cytoglobin	-1.27359	1.93992e-06
ENSG00000161798	AQP5	aquaporin 5	-3.31854	3.87568e-16
ENSG00000162004	CCDC78	coiled-coil domain containing 78	-1.29957	0.000146094
ENSG00000162174	ASRGL1	asparaginase like 1	-1.1176	4.25733e-07
ENSG00000162341	TPCN2	two pore segment channel 2	-1.17022	0.000944098
ENSG00000162702	ZNF281	zinc finger protein 281	-1.00853	9.03983e-07
ENSG00000162777	DENND2D	DENN/MADD domain containing 2D	-1.77502	4.47939e-20
ENSG00000163009	C2orf48	chromosome 2 open reading frame 48	-1.33846	0.0268671
ENSG00000163113	OTUD7B	OTU domain containing 7B	-1.46204	2.7336e-07
ENSG00000163216	SPRR2D	small proline-rich protein 2D	-1.81157	0.000195706
ENSG00000163430	FSTL1	follistatin-like 1	-1.13209	2.15724e-06
ENSG00000163565	IFI16	interferon, gamma-inducible protein 16	-1.39857	4.86688e-15
ENSG00000163568	AIM2	absent in melanoma 2	-2.00297	0.00357004
ENSG00000163811	WDR43	WD repeat domain 43	-1.00593	3.14226e-05
ENSG00000163939	PBRM1	polybromo 1	-1.4512	9.61036e-14
ENSG00000164032	H2AFZ	H2A histone family, member Z	-1.19166	4.62095e-07
ENSG00000164045	CDC25A	cell division cycle 25 homolog A (S. pombe)	-1.9472	3.85622e-18
ENSG00000164109	MAD2L1	MAD2 mitotic arrest deficient-like 1 (yeast)	-1.00531	3.54013e-07
ENSG00000164151	KIAA0947	KIAA0947	-1.41005	1.969e-11
ENSG00000164163	ABCE1	ATP-binding cassette, sub-family E (OABP), member 1	-1.08728	2.65663e-08
ENSG00000164265	SCGB3A2	secretoglobin, family 3A, member 2	-1.31085	0.00272144
ENSG00000164742	ADCY1	adenylate cyclase 1 (brain)	-1.76542	3.23975e-14
ENSG00000164949	GEM	GTP binding protein overexpressed in skeletal muscle	-1.6821	1.18185e-05
ENSG00000164989	CCDC171	coiled-coil domain containing 171	-1.34269	2.55945e-05
ENSG00000165097	KDM1B	lysine (K)-specific demethylase 1B	-1.01258	8.62511e-05
ENSG00000165572	KBTBD6	kelch repeat and BTB (POZ) domain containing 6	-1.19831	3.39948e-05
ENSG00000165732	DDX21	DEAD (Asp-Glu-Ala-Asp) box helicase 21	-1.06666	1.88052e-06
ENSG00000165868	HSPA12A	heat shock 70kDa protein 12A	-1.26236	8.0591e-11
ENSG00000166086	JAM3	junctional adhesion molecule 3	-1.37158	8.68852e-08
ENSG00000166387	PPFIBP2	PTPRF interacting protein, binding protein 2 (liprin beta 2)	-1.20968	4.0828e-06
ENSG00000166394	CYB5R2	cytochrome b5 reductase 2	-1.03367	0.00277321
ENSG00000166575	TMEM135	transmembrane protein 135	-1.09706	2.67608e-06
ENSG00000166793	YPEL4	yippee-like 4 (Drosophila)	-1.45578	0.000762871
ENSG00000166831	RBPMS2	RNA binding protein with multiple splicing 2	-1.0414	0.000228049
ENSG00000166897	ELFN2	extracellular leucine-rich repeat and fibronectin type III domain containing 2	-1.5392	0.0331051
ENSG00000167355	AC104389.28		-1.10906	0.00161916
ENSG00000167550	RHEBL1	Ras homolog enriched in brain like 1	-1.14844	0.000304357
ENSG00000167580	AQP2	aquaporin 2 (collecting duct)	-2.41295	9.07913e-05
ENSG00000168490	PHYHIP	phytanoyl-CoA 2-hydroxylase interacting protein	-1.08793	0.0153846
ENSG00000168496	FEN1	flap structure-specific endonuclease 1	-1.0452	1.85763e-07
ENSG00000168505	GBX2	gastrulation brain homeobox 2	-1.06167	0.0304831
ENSG00000168993	CPLX1	complexin 1	-1.38305	0.0048989
ENSG00000169174	PCSK9	proprotein convertase subtilisin/kexin type 9	-4.5804	8.70437e-46
ENSG00000169224	GCSAML	germinal center-associated, signaling and motility-like	-2.3234	7.88174e-06
ENSG00000169607	CKAP2L	cytoskeleton associated protein 2-like	-1.04621	5.67874e-06
ENSG00000169856	ONECUT1	one cut homeobox 1	-1.06879	0.00681755
ENSG00000169860	P2RY1	purinergic receptor P2Y, G-protein coupled, 1	-1.72627	6.06256e-08
ENSG00000170044	ZPLD1	zona pellucida-like domain containing 1	-2.17091	0.000497205
ENSG00000170312	CDK1	cyclin-dependent kinase 1	-1.36153	3.38165e-14
ENSG00000170439	METTL7B	methyltransferase like 7B	-1.07958	0.00471288
ENSG00000170627	GTSF1	gametocyte specific factor 1	-1.17895	1.84488e-05
ENSG00000170677	SOCS6	suppressor of cytokine signaling 6	-1.32443	1.48577e-07
ENSG00000170681	MURC	muscle-related coiled-coil protein	-1.21635	0.00609792
ENSG00000170802	FOXN2	forkhead box N2	-1.25651	9.83767e-05
ENSG00000170961	HAS2	hyaluronan synthase 2	-2.0373	2.32568e-11
ENSG00000171126	KCNG3	potassium voltage-gated channel, subfamily G, member 3	-1.56361	8.17029e-06
ENSG00000171314	PGAM1	phosphoglycerate mutase 1 (brain)	-1.25806	2.78454e-12
ENSG00000171517	LPAR3	lysophosphatidic acid receptor 3	-1.48921	0.00534625
ENSG00000171848	RRM2	ribonucleotide reductase M2	-1.05211	2.15253e-08
ENSG00000172183	ISG20	interferon stimulated exonuclease gene 20kDa	-1.8057	1.51741e-08
ENSG00000172318	B3GALT1	UDP-Gal:betaGlcNAc beta 1,3-galactosyltransferase, polypeptide 1	-1.24146	0.0163436
ENSG00000172578	KLHL6	kelch-like 6 (Drosophila)	-1.68557	7.26213e-17
ENSG00000173281	PPP1R3B	protein phosphatase 1, regulatory subunit 3B	-1.18299	0.0010455
ENSG00000173546	CSPG4	chondroitin sulfate proteoglycan 4	-1.60628	0.00386595
ENSG00000173706	HEG1	HEG homolog 1 (zebrafish)	-1.05276	1.14215e-05
ENSG00000174348	PODN	podocan	-2.84524	7.28102e-10
ENSG00000174705	SH3PXD2B	SH3 and PX domains 2B	-1.34388	2.30069e-09
ENSG00000175274	TP53I11	tumor protein p53 inducible protein 11	-2.6327	3.41658e-07
ENSG00000175305	CCNE2	cyclin E2	-1.06973	4.34303e-06
ENSG00000175445	LPL	lipoprotein lipase	-1.58153	1.06924e-07
ENSG00000175567	UCP2	uncoupling protein 2 (mitochondrial, proton carrier)	-1.30384	3.40457e-08
ENSG00000175895	PLEKHF2	pleckstrin homology domain containing, family F (with FYVE domain) member 2	-1.15403	1.60306e-05
ENSG00000176049	JAKMIP2	janus kinase and microtubule interacting protein 2	-1.22292	0.00754478
ENSG00000176208	ATAD5	ATPase family, AAA domain containing 5	-1.06965	7.03656e-05
ENSG00000176998	HCG4	HLA complex group 4 (non-protein coding)	-1.19651	9.27076e-07
ENSG00000177173	NAP1L4P1	nucleosome assembly protein 1-like 4 pseudogene 1	-1.39897	0.000483293
ENSG00000177359	RP11-551L14.1		-2.08634	1.76322e-09
ENSG00000177363	LRRN4CL	LRRN4 C-terminal like	-1.8456	2.91696e-06
ENSG00000177432	NAP1L5	nucleosome assembly protein 1-like 5	-1.42089	1.14006e-11
ENSG00000177602	GSG2	germ cell associated 2 (haspin)	-1.24539	2.54851e-05
ENSG00000177614	PGBD5	piggyBac transposable element derived 5	-1.36445	3.90742e-05
ENSG00000177628	GBA	glucosidase, beta, acid	-1.1524	1.3434e-08
ENSG00000177842	ZNF620	zinc finger protein 620	-1.75499	4.84431e-13
ENSG00000178233	TMEM151B	transmembrane protein 151B	-1.31652	0.0105212
ENSG00000178385	PLEKHM3	pleckstrin homology domain containing, family M, member 3	-1.03414	0.00235689
ENSG00000178722	C5orf64	chromosome 5 open reading frame 64	-2.17193	2.55587e-09
ENSG00000178752	FAM132B	family with sequence similarity 132, member B	-1.5103	0.000407907
ENSG00000178878	APOLD1	apolipoprotein L domain containing 1	-1.05328	1.73075e-08
ENSG00000179331	RAB39A	RAB39A, member RAS oncogene family	-1.42249	0.00473302
ENSG00000179361	ARID3B	AT rich interactive domain 3B (BRIGHT-like)	-1.17414	0.000132074
ENSG00000179388	EGR3	early growth response 3	-1.83934	3.51155e-05
ENSG00000179399	GPC5	glypican 5	-2.02298	1.5281e-15
ENSG00000179750	APOBEC3B	apolipoprotein B mRNA editing enzyme, catalytic polypeptide-like 3B	-1.1652	0.000122788
ENSG00000181163	NPM1	nucleophosmin (nucleolar phosphoprotein B23, numatrin)	-1.01115	2.14782e-05
ENSG00000181418	DDN	dendrin	-1.3367	0.0104996
ENSG00000181544	FANCB	Fanconi anemia, complementation group B	-1.19327	4.05195e-07
ENSG00000181827	RFX7	regulatory factor X, 7	-1.16147	4.63489e-09
ENSG00000182326	C1S	complement component 1, s subcomponent	-2.08889	8.20472e-07
ENSG00000182352	C17orf77	chromosome 17 open reading frame 77	-1.12017	0.00210596
ENSG00000182389	CACNB4	calcium channel, voltage-dependent, beta 4 subunit	-1.03606	0.0356198
ENSG00000182504	CEP97	centrosomal protein 97kDa	-1.00244	0.000177061
ENSG00000182768	NGRN	neugrin, neurite outgrowth associated	-1.08656	1.05131e-07
ENSG00000182901	RGS7	regulator of G-protein signaling 7	-1.26436	1.25575e-05
ENSG00000183251	OR51B4	olfactory receptor, family 51, subfamily B, member 4	-1.12224	0.0172326
ENSG00000183337	BCOR	BCL6 corepressor	-1.76159	1.39895e-10
ENSG00000183508	FAM46C	family with sequence similarity 46, member C	-1.14711	0.000265714
ENSG00000183621	ZNF438	zinc finger protein 438	-1.89454	3.63129e-16
ENSG00000183696	UPP1	uridine phosphorylase 1	-1.5874	5.84301e-13
ENSG00000183873	SCN5A	sodium channel, voltage-gated, type V, alpha subunit	-1.06161	0.0386909
ENSG00000184224	C11orf72	chromosome 11 open reading frame 72	-1.2519	1.15169e-09
ENSG00000184640	SEPT9	septin 9	-1.55064	5.61005e-13
ENSG00000184937	WT1	Wilms tumor 1	-1.45919	0.0127005
ENSG00000185442	FAM174B	family with sequence similarity 174, member B	-1.69945	4.08859e-19
ENSG00000185614	FAM212A	family with sequence similarity 212, member A	-1.32828	7.96628e-05
ENSG00000185737	NRG3	neuregulin 3	-1.3454	9.45641e-07
ENSG00000185947	ZNF267	zinc finger protein 267	-1.38423	4.58161e-06
ENSG00000185989	RASA3	RAS p21 protein activator 3	-1.04695	1.00814e-06
ENSG00000186106	ANKRD46	ankyrin repeat domain 46	-1.88635	5.29726e-19
ENSG00000186230	ZNF749	zinc finger protein 749	-1.18754	0.00394853
ENSG00000186297	GABRA5	gamma-aminobutyric acid (GABA) A receptor, alpha 5	-1.30847	2.69806e-06
ENSG00000186314	PRELID2	PRELI domain containing 2	-1.33708	1.35788e-07
ENSG00000186472	PCLO	piccolo (presynaptic cytomatrix protein)	-1.57547	3.40473e-10
ENSG00000186603	HPDL	4-hydroxyphenylpyruvate dioxygenase-like	-1.92139	7.47363e-11
ENSG00000186676	RP11-319G5.1		-1.33478	0.00188764
ENSG00000186871	ERCC6L	excision repair cross-complementing rodent repair deficiency, complementation group 6-like	-1.03772	1.46144e-06
ENSG00000187098	MITF	microphthalmia-associated transcription factor	-1.0628	4.62523e-09
ENSG00000187164	KIAA1598	KIAA1598	-1.03537	0.000495105
ENSG00000187607	ZNF286A	zinc finger protein 286A	-1.03179	0.000595876
ENSG00000187642	C1orf170	chromosome 1 open reading frame 170	-2.69851	8.75034e-19
ENSG00000187772	LIN28B	lin-28 homolog B (C. elegans)	-1.32935	1.73623e-10
ENSG00000187957	DNER	delta/notch-like EGF repeat containing	-1.41559	2.72898e-07
ENSG00000188313	PLSCR1	phospholipid scramblase 1	-1.0686	3.63308e-08
ENSG00000188522	FAM83G	family with sequence similarity 83, member G	-1.82212	0.00635573
ENSG00000188643	S100A16	S100 calcium binding protein A16	-1.08616	1.01009e-05
ENSG00000189362	TMEM194B	transmembrane protein 194B	-1.41641	4.56421e-12
ENSG00000196083	IL1RAP	interleukin 1 receptor accessory protein	-1.01307	5.44923e-06
ENSG00000196242	OR2C3	olfactory receptor, family 2, subfamily C, member 3	-1.52902	0.0435079
ENSG00000196557	CACNA1H	calcium channel, voltage-dependent, T type, alpha 1H subunit	-1.51778	2.85499e-06
ENSG00000196636	ACN9	ACN9 homolog (S. cerevisiae)	-1.22887	3.9264e-05
ENSG00000196739	COL27A1	collagen, type XXVII, alpha 1	-1.34655	0.00889162
ENSG00000197147	LRRC8B	leucine rich repeat containing 8 family, member B	-1.59118	5.32865e-17
ENSG00000197299	BLM	Bloom syndrome, RecQ helicase-like	-1.17488	1.1665e-09
ENSG00000197312	DDI2	DNA-damage inducible 1 homolog 2 (S. cerevisiae)	-1.51987	2.76633e-11
ENSG00000197462	AC005276.1		-1.12331	0.00394853
ENSG00000197599	CCDC154	coiled-coil domain containing 154	-1.08652	0.0108109
ENSG00000198168	SVIP	small VCP/p97-interacting protein	-1.52915	3.88791e-10
ENSG00000198203	SULT1C2	sulfotransferase family, cytosolic, 1C, member 2	-1.66358	2.1893e-05
ENSG00000198265	HELZ	helicase with zinc finger	-1.05059	7.04109e-08
ENSG00000198542	ITGBL1	integrin, beta-like 1 (with EGF-like repeat domains)	-2.18676	8.81799e-07
ENSG00000198814	GK	glycerol kinase	-1.24238	1.31121e-07
ENSG00000198963	RORB	RAR-related orphan receptor B	-1.65243	1.82597e-06
ENSG00000203306	AP001007.1		-1.04997	0.00271732
ENSG00000203386	AC009499.1		-1.14922	3.05914e-06
ENSG00000203446	AC004988.1		-2.16974	7.50899e-15
ENSG00000203837	PNLIPRP3	pancreatic lipase-related protein 3	-3.15716	3.59333e-21
ENSG00000203999	RP11-290F20.1		-1.35164	0.000150943
ENSG00000204899	MZT1	mitotic spindle organizing protein 1	-1.02999	1.57869e-07
ENSG00000205208	C4orf46	chromosome 4 open reading frame 46	-1.18113	7.41244e-07
ENSG00000206190	ATP10A	ATPase, class V, type 10A	-1.20905	6.4324e-09
ENSG00000211750	TRBV24-1	T cell receptor beta variable 24-1	-1.80267	0.00626901
ENSG00000212232	SNORD17	small nucleolar RNA, C/D box 17	-1.15515	0.00811751
ENSG00000212766	LINC00277	long intergenic non-protein coding RNA 277	-1.70543	0.00138416
ENSG00000213085	CCDC19	coiled-coil domain containing 19	-1.9382	0.00138443
ENSG00000213123	TCTEX1D2	Tctex1 domain containing 2	-1.72643	2.83312e-05
ENSG00000213390	ARHGAP19	Rho GTPase activating protein 19	-1.08372	1.9424e-05
ENSG00000214076	CPSF1P1	cleavage and polyadenylation specific factor 1, 160kDa pseudogene 1	-1.48116	0.0202285
ENSG00000214110	LDHAP4	lactate dehydrogenase A pseudogene 4	-1.07035	0.000938571
ENSG00000214146	RP11-699L21.1		-1.61585	0.0273951
ENSG00000214530	STARD10	StAR-related lipid transfer (START) domain containing 10	-1.52605	5.8138e-10
ENSG00000214776	RP11-726G1.1		-1.86881	4.94888e-14
ENSG00000214796	RP11-480I12.5		-1.18551	0.00060302
ENSG00000214922	HLA-F-AS1	HLA-F antisense RNA 1	-1.51915	7.64588e-07
ENSG00000214944	ARHGEF28	Rho guanine nucleotide exchange factor (GEF) 28	-2.14689	1.33109e-06
ENSG00000215146	RP11-313J2.1		-1.40739	0.0138898
ENSG00000215246	RP11-43F13.3		-1.32078	7.61412e-06
ENSG00000215262	KCNU1	potassium channel, subfamily U, member 1	-1.01659	0.00851016
ENSG00000215817	ZC3H11B	zinc finger CCCH-type containing 11B pseudogene	-1.95853	7.22769e-05
ENSG00000221288	MIR663B	microRNA 663b	-2.09848	0.00107867
ENSG00000223949	RP11-24J23.2		-1.61797	0.00489048
ENSG00000224141	AL109763.2		-1.5054	0.00101565
ENSG00000224330	AC005019.3		-1.45111	0.0178603
ENSG00000224397	RP11-290F20.3		-2.55557	7.44087e-14
ENSG00000224825	RP11-171A24.3		-1.52173	0.0057743
ENSG00000225106	RP11-429E11.2		-2.49126	2.55112e-17
ENSG00000225328	AC019100.3		-2.5942	7.44718e-07
ENSG00000225764	LEPREL1-AS1	LEPREL1 antisense RNA 1	-1.1884	0.000111975
ENSG00000226539	AC012512.1		-1.80928	3.82951e-06
ENSG00000226869	LHFPL3-AS1	LHFPL3 antisense RNA 1	-1.47983	2.43074e-15
ENSG00000227242	RP11-325P15.3		-2.02693	9.95508e-08
ENSG00000228495	RP3-523C21.1		-1.31519	0.00479661
ENSG00000228789	HCG22	HLA complex group 22 (non-protein coding)	-2.76481	7.26694e-13
ENSG00000229195	AC009495.4		-1.93045	1.01118e-05
ENSG00000229607	RP5-1125N11.1		-1.84089	0.00108976
ENSG00000229729	RP11-159G9.5	Uncharacterized protein	-1.08809	2.46843e-05
ENSG00000229771	RP4-644L1.2		-2.69824	7.41244e-07
ENSG00000229828	RP11-94I2.1		-1.50374	0.010919
ENSG00000231221	AC023672.2		-1.77012	0.013609
ENSG00000231367	AC016995.3		-1.67208	0.00055967
ENSG00000231389	HLA-DPA1	major histocompatibility complex, class II, DP alpha 1	-1.28052	0.0288474
ENSG00000231607	DLEU2	deleted in lymphocytic leukemia 2 (non-protein coding)	-1.01281	0.00292552
ENSG00000231811	RP3-527G5.1		-2.92551	8.42788e-39
ENSG00000232053	AC009784.3		-2.00947	1.72317e-14
ENSG00000232411	AC009495.3		-1.61561	0.000566525
ENSG00000233080	CTA-714B7.5		-1.22271	0.0394519
ENSG00000233388	RP4-569D19.5		-2.18829	5.32064e-09
ENSG00000233539	AC011294.3	Uncharacterized protein	-1.03167	0.00572326
ENSG00000233610	LINC00462	long intergenic non-protein coding RNA 462	-1.94592	0.00176008
ENSG00000234011	RP3-461P17.10		-1.47303	0.00927064
ENSG00000235160	AC009878.2		-3.4664	5.45147e-11
ENSG00000235172	CTB-114C7.3		-1.9379	0.00131017
ENSG00000235192	AC009495.2		-1.71955	0.0011275
ENSG00000235847	LDHAP7	lactate dehydrogenase A pseudogene 7	-1.02845	0.00192576
ENSG00000235897	TM4SF19-AS1	TM4SF19 antisense RNA 1	-1.58685	1.24404e-07
ENSG00000236013	RP3-332B22.1		-1.85136	3.80091e-06
ENSG00000236081	AC074389.9		-1.11775	0.0127601
ENSG00000236537	RP11-732M18.3		-1.11471	0.0336014
ENSG00000236673	RP11-69I8.2		-1.48648	3.66067e-05
ENSG00000237685	RP11-360O19.4		-1.4817	0.0244796
ENSG00000237864	LINC00322	long intergenic non-protein coding RNA 322	-2.08396	1.01184e-05
ENSG00000237989	AP001046.5		-1.34074	0.00151978
ENSG00000239508	PLCH1-AS1	PLCH1 antisense RNA 1	-2.45314	3.79784e-11
ENSG00000241224	RP11-59E19.1		-1.68735	0.00144374
ENSG00000241732	RP11-38P22.2		-1.72137	2.93092e-05
ENSG00000243244	STON1	stonin 1	-1.51893	8.96425e-06
ENSG00000244509	APOBEC3C	apolipoprotein B mRNA editing enzyme, catalytic polypeptide-like 3C	-1.24577	0.0113736
ENSG00000246922	UBAP1L	ubiquitin associated protein 1-like	-2.05086	2.17249e-13
ENSG00000247011	RP11-700H6.1		-1.73217	0.00734974
ENSG00000248375	RP11-177B4.1		-1.33421	0.0254974
ENSG00000248964	RP11-94H18.1		-2.33617	2.14135e-14
ENSG00000248996	RP11-1334A24.6		-1.34038	0.0060529
ENSG00000249328	RP11-26J3.1		-1.9454	0.00261519
ENSG00000250039	RP11-17E2.2		-1.36198	0.000451706
ENSG00000250328	CTC-210G5.1		-1.33739	0.00120939
ENSG00000250378	RP11-119J18.1		-1.34254	0.0201738
ENSG00000250748	RP11-230G5.2		-1.72062	0.000933816
ENSG00000251191	LINC00589	long intergenic non-protein coding RNA 589	-2.60107	2.30804e-17
ENSG00000251364	CTD-2516F10.2		-2.51262	4.38113e-16
ENSG00000253207	RP11-67H2.1	Uncharacterized protein	-1.94129	0.000173157
ENSG00000253490	AC145110.1		-1.92992	2.01915e-12
ENSG00000254350	RP11-542A14.1		-2.42646	1.23621e-15
ENSG00000254416	RP11-347E10.1		-1.06128	0.0308403
ENSG00000254539	RP4-791M13.3		-1.67395	0.000137785
ENSG00000254645	RP11-396O20.2		-1.75581	5.37217e-05
ENSG00000255119	RP11-655M14.12		-1.58463	0.00585519
ENSG00000255148	RP4-791M13.4		-1.51097	0.0189498
ENSG00000255346	NOX5	NADPH oxidase, EF-hand calcium binding domain 5	-1.94158	0.00340058
ENSG00000255545	RP11-627G23.1		-1.77131	0.00192584
ENSG00000255571	CTD-2335A18.1		-1.05535	0.0216732
ENSG00000256546	AC156455.1		-1.37885	0.000210838
ENSG00000256579	AC135776.1		-1.07381	0.035492
ENSG00000256673	RP11-599J14.2		-1.87409	3.29511e-13
ENSG00000257588	RP11-469H8.6		-3.39753	3.7719e-19
ENSG00000258484	SPESP1	sperm equatorial segment protein 1	-1.33283	1.51741e-08
ENSG00000258676	RP11-386M24.3		-1.25014	0.0432043
ENSG00000258791	LINC00520	long intergenic non-protein coding RNA 520	-1.87861	7.65181e-25
ENSG00000259720	RP11-348B17.1		-1.39851	0.00809382
ENSG00000259828	RP11-63E9.1		-1.22396	0.0287125
ENSG00000260316	LA16c-306A4.2		-1.51505	0.00972177
ENSG00000260423	RP13-735L24.1		-2.00937	1.91333e-09
ENSG00000260834	RP11-256I9.2		-1.3885	2.83585e-05
ENSG00000260880	RP11-346C20.2		-1.51232	1.37076e-05
ENSG00000261036	RP11-574H6.1		-2.32632	7.64473e-05
ENSG00000261645	RP11-660M18.2		-1.87957	0.00328085
ENSG00000261780	CTD-2354A18.1		-1.60062	4.67809e-10
ENSG00000262222	RP11-876N24.4		-2.0131	4.18796e-08
ENSG00000263154	RP11-1055B8.2		-1.51852	0.00173658
ENSG00000265992	ESRG	embryonic stem cell related (non-protein coding)	-1.61871	2.33861e-11
ENSG00000267041	ZNF850	zinc finger protein 850	-1.32049	8.18427e-08
ENSG00000267696	CTB-151G24.1		-1.09746	3.35542e-05

## Sheet: 501M_shMITF_Down-Ontology
Category	Term	Count	%	PValue	Genes	List Total	Pop Hits	Pop Total	Fold Enrichment	Bonferroni	Benjamini	FDR
GOTERM_BP_FAT	GO:0051301~cell division	22	4.554865424430641	2.927070109042563E-5	CDK1, NOX5, HAUS2, CENPF, AHCTF1, BRCA2, ANLN, CDC25A, CDK2, TGFB2, CCNE2, FAM83D, NCAPH, CCND1, MAD2L1, INCENP, CIT, ASPM, MYH10, APC, SEPT9, ERCC6L	352	295	13528	2.8661016949152542	0.06516210595356664	0.06516210595356664	0.05113961058244021
GOTERM_BP_FAT	GO:0006260~DNA replication	17	3.5196687370600417	3.595093129919771E-5	CLSPN, BLM, CENPF, IGF1, BRCA2, MCM10, CDC25A, CDK2, MCM6, RPA1, CCNE2, POLE2, HELB, RRM2, POLQ, FEN1, NFIB	352	190	13528	3.4386363636363635	0.07942843129740718	0.040535790817295414	0.06280736006764043
GOTERM_BP_FAT	GO:0006259~DNA metabolic process	30	6.211180124223603	5.59603491768518E-5	CLSPN, BLM, MCM10, ISG20, RPA1, CCNE2, POLE2, TRDMT1, POLQ, CRY1, FEN1, FANCB, ESCO1, RAD51AP1, SWAP70, BIRC7, CENPF, IGF1, BRCA2, PPFIBP2, UBE2B, CDK2, EEPD1, CDC25A, MCM6, TXNDC12, HELB, RRM2, NFIB, BARD1	352	506	13528	2.278566295364714	0.12087161009804137	0.042032515670912374	0.09774830405091528
GOTERM_BP_FAT	GO:0000279~M phase	22	4.554865424430641	1.4020620142709322E-4	CDK1, MKI67, HAUS2, CENPF, BRCA2, AURKA, ANLN, CDC25A, CDK2, EML4, RPA1, FAM83D, PRDM7, NCAPH, TEX15, MAD2L1, INCENP, PBRM1, CIT, ASPM, APC, ERCC6L	352	329	13528	2.569908814589666	0.2758649015273875	0.07752437481104957	0.2447342216123194
GOTERM_BP_FAT	GO:0007067~mitosis	17	3.5196687370600417	2.034657957278122E-4	CDK1, HAUS2, CENPF, AURKA, ANLN, CDC25A, CDK2, EML4, FAM83D, NCAPH, MAD2L1, INCENP, PBRM1, CIT, ASPM, APC, ERCC6L	352	220	13528	2.9697314049586776	0.37401315201268903	0.08943062065029883	0.354970819217848
GOTERM_BP_FAT	GO:0000280~nuclear division	17	3.5196687370600417	2.034657957278122E-4	CDK1, HAUS2, CENPF, AURKA, ANLN, CDC25A, CDK2, EML4, FAM83D, NCAPH, MAD2L1, INCENP, PBRM1, CIT, ASPM, APC, ERCC6L	352	220	13528	2.9697314049586776	0.37401315201268903	0.08943062065029883	0.354970819217848
GOTERM_BP_FAT	GO:0022403~cell cycle phase	25	5.175983436853002	2.0613439493833883E-4	BLM, HAUS2, AURKA, ANLN, RPA1, FAM83D, NCAPH, INCENP, PBRM1, ASPM, APC, ERCC6L, CDK1, MKI67, BRCA2, CENPF, FOXN3, CDK2, CDC25A, EML4, PRDM7, CCND1, TEX15, MAD2L1, CIT	352	414	13528	2.320761967501098	0.37784765679084853	0.0760479000604326	0.35961861271003315
GOTERM_BP_FAT	GO:0000087~M phase of mitotic cell cycle	17	3.5196687370600417	2.4950902400611743E-4	CDK1, HAUS2, CENPF, AURKA, ANLN, CDC25A, CDK2, EML4, FAM83D, NCAPH, MAD2L1, INCENP, PBRM1, CIT, ASPM, APC, ERCC6L	352	224	13528	2.9167004870129865	0.43698073919378333	0.07878613756688413	0.4351338328339005
GOTERM_BP_FAT	GO:0007049~cell cycle	38	7.867494824016563	2.5251186383710425E-4	CLSPN, BLM, HAUS2, E2F8, AURKA, ANLN, TGFB2, FAM83D, CCNE2, RPA1, NCAPH, HJURP, INCENP, NPM1, PBRM1, ASPM, ERCC6L, APC, ESCO1, CDK1, MKI67, CENPF, BRCA2, GAS7, GSG2, CDC25A, CDK2, FOXN3, MCM6, EML4, PRDM7, CCND1, MAD2L1, TEX15, CIT, BARD1, MYH10, SEPT9	352	776	13528	1.8819704779756328	0.4408601807662027	0.07009185279261221	0.44035977883829514
GOTERM_BP_FAT	GO:0048168~regulation of neuronal synaptic plasticity	7	1.4492753623188406	2.947787398584142E-4	SYP, EGR1, EGR2, GRIN2B, APOE, BCAN, VGF	352	36	13528	7.472853535353535	0.49271418389938404	0.07263585168072118	0.513890852749499
GOTERM_BP_FAT	GO:0048285~organelle fission	17	3.5196687370600417	3.201484999801982E-4	CDK1, HAUS2, CENPF, AURKA, ANLN, CDC25A, CDK2, EML4, FAM83D, NCAPH, MAD2L1, INCENP, PBRM1, CIT, ASPM, APC, ERCC6L	352	229	13528	2.8530170702659787	0.5215003712520818	0.07105893781749706	0.5580016662320775
GOTERM_BP_FAT	GO:0022402~cell cycle process	30	6.211180124223603	3.699384997876847E-4	BLM, HAUS2, AURKA, ANLN, TGFB2, FAM83D, RPA1, NCAPH, INCENP, NPM1, PBRM1, ASPM, APC, ERCC6L, CDK1, MKI67, CENPF, BRCA2, GAS7, CDC25A, CDK2, FOXN3, EML4, PRDM7, CCND1, TEX15, MAD2L1, CIT, BARD1, MYH10	352	565	13528	2.0406275140788415	0.5733349436368808	0.07451037969674557	0.6445187474821812
GOTERM_BP_FAT	GO:0007517~muscle organ development	16	3.3126293995859215	4.0733177337192605E-4	EGR3, ERBB3, MET, RXRG, CENPF, IGF1, CACNB4, SOX6, CAPN3, TGFB2, MURC, COL19A1, DNER, ITGA7, CACNA1H, MYH10	352	211	13528	2.914261094355881	0.6085387579888764	0.07517960750191022	0.709448118429723
GOTERM_BP_FAT	GO:0048511~rhythmic process	12	2.484472049689441	4.979134030320211E-4	SRRD, EGR3, EGR2, GRIN2B, PTGDS, ERBB3, PER2, CHRNB2, PER3, CRY1, VGF, TGFB2	352	128	13528	3.602982954545454	0.6822473731377166	0.08441395364653492	0.8665675261753214
GOTERM_BP_FAT	GO:0000910~cytokinesis	7	1.4492753623188406	6.102078575191521E-4	NOX5, INCENP, AHCTF1, BRCA2, ANLN, MYH10, APC	352	41	13528	6.561529933481153	0.7546641624244981	0.09549390128543855	1.0610237544549372
GOTERM_BP_FAT	GO:0006261~DNA-dependent DNA replication	8	1.6563146997929608	7.187128057421943E-4	RPA1, CCNE2, BLM, POLE2, HELB, BRCA2, FEN1, MCM6	352	58	13528	5.300940438871473	0.8089216471491099	0.10446870760775084	1.2485761751531155
GOTERM_BP_FAT	GO:0006974~response to DNA damage stimulus	22	4.554865424430641	7.468821517414764E-4	ESCO1, CLSPN, CDK1, RAD51AP1, BLM, BRCA2, ATAD5, IFI16, UBE2B, FOXN3, EEPD1, RPA1, TXNDC12, CCND1, POLE2, HIPK2, POLQ, CRY1, FEN1, FANCB, BARD1, APC	352	373	13528	2.266756032171582	0.8209276023757268	0.10192151855647247	1.2972124758580228
GOTERM_BP_FAT	GO:0033554~cellular response to stress	29	6.004140786749482	8.277259311079337E-4	CLSPN, BLM, AQP2, RPA1, STAC, POLE2, PCSK9, POLQ, CRY1, FEN1, FANCB, APC, ESCO1, CDK1, RAD51AP1, FADS1, TAOK3, BIRC7, BRCA2, ATAD5, IFI16, UBE2B, FOXN3, EEPD1, DHRS2, TXNDC12, CCND1, HIPK2, BARD1	352	566	13528	1.9691214262769032	0.8513579353461396	0.10607217701436034	1.436669406670621
GOTERM_BP_FAT	GO:0006811~ion transport	36	7.453416149068323	8.363450814239666E-4	FXYD3, SLC5A4, SLC39A11, SLC20A1, KCNAB2, SCN3A, AQP6, CACNB4, KCNIP2, ATP12A, TPCN2, KCNU1, COL9A1, ATP2B3, GRIN2B, TTYH2, KCNG3, SCN5A, CHRNA3, GABRP, TRPM6, NOX5, GABRA5, ATP1A3, ATP13A3, CDK2, TRPM1, P2RX7, UCP2, CACNA1H, SLC5A9, PLLP, CHRNB2, SLC5A10, CACNA1D, ADD2	352	768	13528	1.8014914772727273	0.8542805265292954	0.1014779171189023	1.4515266281469485
GOTERM_BP_FAT	GO:0007242~intracellular signaling cascade	52	10.766045548654244	8.449812771322528E-4	ADCY1, PLEKHM3, NRG3, LPAR3, AURKA, TENC1, STAC, TIAM1, APOE, RAPGEF5, PLCB2, S100A1, RAB27A, GHR, CDK1, SOCS6, GEM, IFI16, PCLO, PPARGC1A, FOXN3, PPARGC1B, FARP2, ARHGAP31, TNS3, CCND1, DOK3, HIPK2, BLM, ERBB3, EFCAB4B, PLCL1, ALDH1A2, P2RY1, RASA3, FEN1, RHEBL1, ITK, TAOK3, MET, BIRC7, BRCA2, IGF1, GSG2, RPS6KA5, TXNDC12, P2RX7, PRLR, CNIH3, RGS7, CIT, ASIP	352	1256	13528	1.5911262304574407	0.8571512883930906	0.09734912657447192	1.466411113864341
GOTERM_BP_FAT	GO:0009894~regulation of catabolic process	10	2.070393374741201	8.568621812660401E-4	GAPDHS, PTPN3, APOE, PGAM1, APOC1, PCSK9, PDE3B, IGF1, BARD1, APC	352	96	13528	4.003314393939394	0.8610084728214161	0.09395573377339295	1.4868843919716213
GOTERM_BP_FAT	GO:0007623~circadian rhythm	7	1.4492753623188406	0.0011402033322184852	EGR3, PTGDS, ERBB3, PER2, CHRNB2, PER3, CRY1	352	46	13528	5.848320158102767	0.9276504164838029	0.11755543979837957	1.9739536879688435
GOTERM_BP_FAT	GO:0007613~memory	6	1.2422360248447204	0.0031871153856454387	ADCY1, GRIN2B, ATP1A3, NTAN1, CHRNB2, SNAP25	352	39	13528	5.9125874125874125	0.9993564147342661	0.2839610606529792	5.425783697106024
GOTERM_BP_FAT	GO:0000278~mitotic cell cycle	20	4.140786749482402	0.0037068765280564475	CDK1, BLM, HAUS2, CENPF, AURKA, ANLN, FOXN3, CDK2, CDC25A, EML4, FAM83D, NCAPH, CCND1, MAD2L1, INCENP, PBRM1, CIT, ASPM, APC, ERCC6L	352	370	13528	2.0773955773955772	0.9998062776822342	0.3104384637489357	6.283863126951372
GOTERM_BP_FAT	GO:0045944~positive regulation of transcription from RNA polymerase II promoter	20	4.140786749482402	0.0037695301645035996	EGR1, EGR2, MITF, TFEB, RXRG, IGF1, SOX6, PPARGC1A, SOX8, WT1, PPARGC1B, HES1, MURC, PRDM7, MEIS2, ETS1, HIPK2, GATA4, NR5A2, NFIB	352	371	13528	2.071796128399902	0.9998323873048848	0.30388746448623594	6.386801563173017
GOTERM_BP_FAT	GO:0030902~hindbrain development	7	1.4492753623188406	0.004501200561000727	HES1, ALDH1A2, EGR2, PLXNA2, GBX2, MYH10, NFIB	352	60	13528	4.483712121212121	0.9999691123489404	0.339927871179189	7.581054261114895
GOTERM_BP_FAT	GO:0042770~DNA damage response, signal transduction	8	1.6563146997929608	0.004677087083093761	CDK1, TXNDC12, CCND1, BLM, HIPK2, BRCA2, IFI16, FOXN3	352	80	13528	3.8431818181818183	0.9999794348269049	0.33970826621902916	7.8659919235464
GOTERM_BP_FAT	GO:0031329~regulation of cellular catabolic process	7	1.4492753623188406	0.004885779045349745	GAPDHS, PTPN3, APOE, PGAM1, APOC1, PCSK9, IGF1	352	61	13528	4.410208643815201	0.9999873091401078	0.34136043336909694	8.203000327400023
GOTERM_BP_FAT	GO:0030001~metal ion transport	23	4.761904761904762	0.004976217700759565	TRPM6, SLC5A4, SLC39A11, SCN3A, SLC20A1, KCNAB2, ATP1A3, CACNB4, ATP12A, KCNIP2, CDK2, TPCN2, KCNU1, ATP2B3, P2RX7, GRIN2B, CACNA1H, SLC5A9, CHRNB2, KCNG3, CACNA1D, SLC5A10, SCN5A	352	465	13528	1.9009286412512219	0.9999897049768898	0.3364409948524849	8.348684894265745
GOTERM_BP_FAT	GO:0010627~regulation of protein kinase cascade	15	3.1055900621118013	0.005594645787837933	SLC20A1, ERBB3, LGALS1, TAOK3, BIRC7, LPAR3, IGF1, ECM1, TGFB2, P2RX7, GRIN2B, HIPK2, OTUD7B, APC, GHR	352	249	13528	2.315169769989047	0.9999975392291676	0.3593974530174714	9.339063694409377
GOTERM_BP_FAT	GO:0030879~mammary gland development	7	1.4492753623188406	0.005726577586278352	NRG3, PRLR, ERBB3, MET, HK2, IGF1, BRCA2	352	63	13528	4.27020202020202	0.9999981868989029	0.35640291656242584	9.549035337342938
GOTERM_BP_FAT	GO:0048167~regulation of synaptic plasticity	7	1.4492753623188406	0.006184446498491777	SYP, EGR1, EGR2, GRIN2B, APOE, BCAN, VGF	352	64	13528	4.203480113636363	0.9999993720472564	0.36913980215678543	10.274190291448647
GOTERM_BP_FAT	GO:0051642~centrosome localization	3	0.6211180124223602	0.006373563372225699	SEMA6A, PLXNA2, ASPM	352	5	13528	23.059090909090905	0.9999995948055598	0.3686946297884952	10.572103818791213
GOTERM_BP_FAT	GO:0006006~glucose metabolic process	11	2.2774327122153206	0.006593210576313341	GPD2, GAPDHS, LDHA, PPP1R3B, ONECUT1, PKLR, PGAM1, HK2, ENO2, PPARGC1A, ACN9	352	153	13528	2.763071895424837	0.9999997564214174	0.3696305983121406	10.916940846992784
GOTERM_BP_FAT	GO:0042063~gliogenesis	7	1.4492753623188406	0.006668391210564622	PLP1, EGR2, ERBB3, DNER, IGF1, C1S, TGFB2	352	65	13528	4.1388111888111885	0.9999997953669109	0.36428275021340006	11.034683078147811
GOTERM_BP_FAT	GO:0007423~sensory organ development	14	2.898550724637681	0.006869138488097257	ERBB3, MITF, RORB, JAG1, WT1, TGFB2, HES1, ALDH1A2, MEIS2, GRIN2B, HOXC13, GBX2, MYH10, APC	352	229	13528	2.349543469630806	0.9999998714974135	0.36450554176212235	11.348359794514806
GOTERM_BP_FAT	GO:0030534~adult behavior	8	1.6563146997929608	0.0069370418281508184	MET, HIPK2, ATP1A3, NTAN1, CHRNB2, CACNB4, ASIP, CHRNA3	352	86	13528	3.5750528541226214	0.9999998902122456	0.3592596814055212	11.454225634554637
GOTERM_BP_FAT	GO:0006096~glycolysis	6	1.2422360248447204	0.007175153460280098	GAPDHS, LDHA, PKLR, PGAM1, HK2, ENO2	352	47	13528	4.906189555125724	0.9999999367863125	0.36110818000448597	11.824516561759758
GOTERM_BP_FAT	GO:0043193~positive regulation of gene-specific transcription	8	1.6563146997929608	0.007380898837231465	HES1, ETS1, GATA4, TFEB, IGF1, RORB, NR5A2, PPARGC1A	352	87	13528	3.5339602925809825	0.9999999607707493	0.36159688071910023	12.14329803247275
GOTERM_BP_FAT	GO:0007009~plasma membrane organization	4	0.8281573498964804	0.007544287571034131	PLSCR1, P2RX7, MYH2, MYH10	352	16	13528	9.607954545454545	0.9999999731444138	0.3604526805527768	12.39567783553598
GOTERM_BP_FAT	GO:0007611~learning or memory	9	1.8633540372670807	0.00826434472234329	EGR1, ADCY1, EGR2, GRIN2B, GABRA5, ATP1A3, NTAN1, CHRNB2, SNAP25	352	111	13528	3.1160933660933665	0.9999999949484463	0.3797230762258761	13.499798838191335
GOTERM_BP_FAT	GO:0001508~regulation of action potential	7	1.4492753623188406	0.00828483667205516	P2RX7, PLP1, MPZ, EGR2, GRIN2B, PLLP, CHRNB2	352	68	13528	3.956216577540107	0.9999999951831037	0.37318314536482267	13.531027944614637
GOTERM_BP_FAT	GO:0048732~gland development	10	2.070393374741201	0.008595997762996719	HES1, ALDH1A2, NRG3, PRLR, ERBB3, MET, HK2, IGF1, BRCA2, TGFB2	352	135	13528	2.8468013468013464	0.9999999976609621	0.37698157995268544	14.003923781646188
GOTERM_BP_FAT	GO:0000075~cell cycle checkpoint	8	1.6563146997929608	0.009368623938465381	CCNE2, CDK1, CCND1, MAD2L1, BLM, CENPF, FOXN3, APC	352	91	13528	3.3786213786213786	0.9999999996113074	0.39583768220144155	15.167622448860897
GOTERM_BP_FAT	GO:0006812~cation transport	25	5.175983436853002	0.009686449673205597	SLC5A4, KCNAB2, SCN3A, SLC20A1, SLC39A11, CACNB4, ATP12A, KCNIP2, TPCN2, KCNU1, ATP2B3, GRIN2B, KCNG3, SCN5A, TRPM6, ATP1A3, ATP13A3, CDK2, P2RX7, UCP2, SLC5A9, CACNA1H, CHRNB2, CACNA1D, SLC5A10	352	553	13528	1.7374239684366268	0.999999999814303	0.39905258140701816	15.641995710778179
GOTERM_BP_FAT	GO:0051640~organelle localization	8	1.6563146997929608	0.009921383779734465	SEMA6A, PLXNA2, NPM1, CENPF, ASIP, ASPM, MYH10, RAB27A	352	92	13528	3.341897233201581	0.9999999998924514	0.3995454913840023	15.991039681109399
GOTERM_BP_FAT	GO:0008283~cell proliferation	21	4.3478260869565215	0.010104735506189583	NOX5, MKI67, E2F8, MET, CENPF, IGF1, BRCA2, IFI16, CDC25A, TGFB2, ISG20, GPC4, SHB, P2RX7, UCN2, CD274, GBX2, BHLHE41, EMP1, ASPM, MYH10	352	436	13528	1.8510738115095913	0.9999999999297824	0.39845162063997974	16.26250073766694
GOTERM_BP_FAT	GO:0019226~transmission of nerve impulse	18	3.7267080745341614	0.01011653271116466	EGR3, PLP1, CPLX1, EGR2, MPZ, SYT5, GABRA5, LPAR3, CACNB4, KCNIP2, PCLO, P2RX7, GRIN2B, APOE, PLLP, CHRNB2, SNAP25, CHRNA3	352	350	13528	1.9764935064935067	0.9999999999316826	0.39226614748030275	16.279938720157528
GOTERM_BP_FAT	GO:0007268~synaptic transmission	16	3.3126293995859215	0.01124007081559357	EGR3, PLP1, CPLX1, MPZ, SYT5, GABRA5, LPAR3, CACNB4, KCNIP2, PCLO, P2RX7, GRIN2B, APOE, CHRNB2, SNAP25, CHRNA3	352	298	13528	2.063453325198292	0.9999999999949979	0.41847857641932396	17.925092213118866
GOTERM_BP_FAT	GO:0046903~secretion	16	3.3126293995859215	0.011816827076861987	PPY, CPLX1, NOX5, AQP5, USE1, CACNB4, AQP6, VGF, PCLO, AQP2, P2RX7, CHRNB2, SNAP25, CHRNA3, MYH10, RAB27A	352	300	13528	2.04969696969697	0.9999999999986944	0.42790821548666014	18.757728388481866
GOTERM_BP_FAT	GO:0010001~glial cell differentiation	6	1.2422360248447204	0.011837985634092262	PLP1, EGR2, ERBB3, DNER, IGF1, C1S	352	53	13528	4.350771869639794	0.9999999999987572	0.4220526594087366	18.788122052730237
GOTERM_BP_FAT	GO:0010740~positive regulation of protein kinase cascade	11	2.2774327122153206	0.011845287445863835	P2RX7, SLC20A1, ERBB3, LGALS1, HIPK2, TAOK3, LPAR3, IGF1, ECM1, GHR, TGFB2	352	167	13528	2.531437125748503	0.9999999999987781	0.4160007687110253	18.79860840887132
GOTERM_BP_FAT	GO:0021545~cranial nerve development	4	0.8281573498964804	0.01232621028672633	HES1, EGR2, ERBB3, CHRNB2	352	19	13528	8.090909090909092	0.9999999999996015	0.4225092039714513	19.486472506767406
GOTERM_BP_FAT	GO:0000725~recombinational repair	4	0.8281573498964804	0.01232621028672633	RPA1, RAD51AP1, BLM, BRCA2	352	19	13528	8.090909090909092	0.9999999999996015	0.4225092039714513	19.486472506767406
GOTERM_BP_FAT	GO:0000724~double-strand break repair via homologous recombination	4	0.8281573498964804	0.01232621028672633	RPA1, RAD51AP1, BLM, BRCA2	352	19	13528	8.090909090909092	0.9999999999996015	0.4225092039714513	19.486472506767406
GOTERM_BP_FAT	GO:0051726~regulation of cell cycle	17	3.5196687370600417	0.01279425732597783	CDK1, BLM, CENPF, IGF1, BRCA2, ANLN, FOXN3, CDC25A, CDK2, MYCBP2, TGFB2, CCNE2, CCND1, MAD2L1, ETS1, NPM1, APC	352	331	13528	1.9738396045042572	0.9999999999998662	0.4283857046004722	20.150642555327302
GOTERM_BP_FAT	GO:0009968~negative regulation of signal transduction	13	2.691511387163561	0.012827492597331106	ONECUT1, ERBB3, TAOK3, SOCS6, PDE3B, RGS17, CCND1, P2RX7, RGS20, HIPK2, OTUD7B, RGS7, APC	352	221	13528	2.2606951871657754	0.9999999999998762	0.42326291777411107	20.197607255043692
GOTERM_BP_FAT	GO:0000085~G2 phase of mitotic cell cycle	3	0.6211180124223602	0.012931373484166502	BLM, CENPF, FOXN3	352	7	13528	16.470779220779217	0.9999999999999029	0.4200229185045481	20.344233288065382
GOTERM_BP_FAT	GO:0051319~G2 phase	3	0.6211180124223602	0.012931373484166502	BLM, CENPF, FOXN3	352	7	13528	16.470779220779217	0.9999999999999029	0.4200229185045481	20.344233288065382
GOTERM_BP_FAT	GO:0045893~positive regulation of transcription, DNA-dependent	22	4.554865424430641	0.012977862603311855	EGR1, EGR2, MITF, TFEB, RXRG, IGF1, RORB, SOX6, PPARGC1A, TRERF1, SOX8, WT1, PPARGC1B, HES1, MURC, PRDM7, MEIS2, ETS1, HIPK2, GATA4, NR5A2, NFIB	352	477	13528	1.7725366876310271	0.9999999999999128	0.4154861663022027	20.409769556381786
GOTERM_BP_FAT	GO:0002520~immune system development	15	3.1055900621118013	0.013129352291356484	EGR1, ONECUT1, BLM, SWAP70, MYO1E, BRCA2, IFI16, JAG1, CACNB4, SOX6, TGFB2, RPA1, DHRS2, ADD2, APC	352	276	13528	2.088685770750988	0.9999999999999387	0.41360003960497294	20.62297384640217
GOTERM_BP_FAT	GO:0042692~muscle cell differentiation	9	1.8633540372670807	0.013504422348700633	DNER, LGALS1, CACNA1H, IGF1, CACNB4, JAG1, SOX6, CAPN3, MYH10	352	121	13528	2.8585649887302784	0.9999999999999745	0.4170406800501515	21.1485272195875
GOTERM_BP_FAT	GO:0051254~positive regulation of RNA metabolic process	22	4.554865424430641	0.014204854175390347	EGR1, EGR2, MITF, TFEB, RXRG, IGF1, RORB, SOX6, PPARGC1A, TRERF1, SOX8, WT1, PPARGC1B, HES1, MURC, PRDM7, MEIS2, ETS1, HIPK2, GATA4, NR5A2, NFIB	352	481	13528	1.7577962577962578	0.999999999999995	0.42776419759960516	22.121210053216966
GOTERM_BP_FAT	GO:0010604~positive regulation of macromolecule metabolic process	34	7.039337474120083	0.01493325175578618	BLM, MITF, TFEB, RORB, SOX6, SOX8, WT1, TGFB2, MEIS2, APOE, GATA4, PCSK9, GHR, APC, EGR1, CDK1, EGR2, RXRG, IGF1, TRERF1, PPARGC1A, PPARGC1B, CDK2, HES1, GAPDHS, PRDM7, MURC, P2RX7, CCND1, ETS1, HIPK2, NR5A2, NFIB, BARD1	352	857	13528	1.524716240585552	0.9999999999999991	0.43856545643412836	23.12072337285467
GOTERM_BP_FAT	GO:0032868~response to insulin stimulus	8	1.6563146997929608	0.015231674200381096	EGR2, ERBB3, FADS1, PCSK9, PDE3B, VGF, UBE2B, GHR	352	100	13528	3.0745454545454547	0.9999999999999996	0.4396709286359519	23.526718330173235
GOTERM_BP_FAT	GO:0021700~developmental maturation	8	1.6563146997929608	0.01601435281404654	SYP, HES1, PLP1, BRCA2, KCNIP2, SOX8, FARP2, TGFB2	352	101	13528	3.044104410441044	0.9999999999999999	0.45086442401223903	24.581948155896637
GOTERM_BP_FAT	GO:0046058~cAMP metabolic process	4	0.8281573498964804	0.016285402087219673	ADCY1, UCN2, PDE3B, CACNB4	352	21	13528	7.320346320346321	1.0	0.45116756537254477	24.944173300239292
GOTERM_BP_FAT	GO:0006007~glucose catabolic process	6	1.2422360248447204	0.017029832336873534	GAPDHS, LDHA, PKLR, PGAM1, HK2, ENO2	352	58	13528	3.9757053291536044	1.0	0.4608802197955437	25.930596053034872
GOTERM_BP_FAT	GO:0007346~regulation of mitotic cell cycle	10	2.070393374741201	0.017655023993367172	CDK1, CCND1, MAD2L1, CENPF, IGF1, BRCA2, ANLN, CDK2, MYCBP2, APC	352	152	13528	2.528409090909091	1.0	0.4678579359084738	26.7495637284604
GOTERM_BP_FAT	GO:0048534~hemopoietic or lymphoid organ development	14	2.898550724637681	0.01835335152746826	EGR1, BLM, ONECUT1, MYO1E, BRCA2, IFI16, JAG1, CACNB4, SOX6, TGFB2, RPA1, DHRS2, ADD2, APC	352	260	13528	2.0694055944055942	1.0	0.47590898495105993	27.65423958786424
GOTERM_BP_FAT	GO:0030071~regulation of mitotic metaphase/anaphase transition	4	0.8281573498964804	0.018501436187973806	MAD2L1, CENPF, MYCBP2, APC	352	22	13528	6.987603305785124	1.0	0.4735664808713834	27.844723091457237
GOTERM_BP_FAT	GO:0030182~neuron differentiation	20	4.140786749482402	0.020251897640241455	EGR2, ERBB3, MDGA1, RORB, JAG1, KCNIP2, GAS7, MYCBP2, TGFB2, FARP2, HES1, SEMA6A, ALDH1A2, NGRN, GBX2, PCSK9, CHRNB2, SNAP25, MYH10, APC	352	438	13528	1.7548775425487753	1.0	0.4997381847205743	30.060833208311944
GOTERM_BP_FAT	GO:0030097~hemopoiesis	13	2.691511387163561	0.020283472855514795	EGR1, BLM, ONECUT1, MYO1E, BRCA2, IFI16, JAG1, SOX6, TGFB2, RPA1, DHRS2, ADD2, APC	352	236	13528	2.1170069337442223	1.0	0.4952342794766105	30.100212332792264
GOTERM_BP_FAT	GO:0022604~regulation of cell morphogenesis	9	1.8633540372670807	0.020837443018749617	TIAM1, APOE, ATP10A, ITGA7, CHRNB2, GAS7, CHRNA3, MYH10, TGFB2	352	131	13528	2.640353920888272	1.0	0.49967351586493935	30.787706592505625
GOTERM_BP_FAT	GO:0042592~homeostatic process	30	6.211180124223603	0.02104395828420807	BLM, TMX4, LPAR3, PDE3B, SOX6, CACNB4, ATP12A, VGF, RPA1, COL9A1, GRIN2B, APOE, NPM1, PCSK9, CHRNA3, APC, LPL, PLP1, EGR2, MPZ, IGF1, PPARGC1A, TRERF1, TXNDC12, P2RX7, TEX15, PLLP, CHRNB2, NR5A2, BARD1	352	751	13528	1.5352257595932695	1.0	0.4982131965887059	31.042363360388414
GOTERM_BP_FAT	GO:0033205~cytokinesis during cell cycle	3	0.6211180124223602	0.02142085113360027	BRCA2, MYH10, APC	352	9	13528	12.810606060606059	1.0	0.4995832109117042	31.504839441429798
GOTERM_BP_FAT	GO:0045941~positive regulation of transcription	24	4.968944099378882	0.02181853594448076	EGR1, EGR2, BLM, MITF, TFEB, RXRG, IGF1, RORB, SOX6, PPARGC1A, TRERF1, SOX8, CDK2, WT1, PPARGC1B, HES1, MURC, PRDM7, MEIS2, ETS1, HIPK2, GATA4, NR5A2, NFIB	352	564	13528	1.6353965183752415	1.0	0.5012488500039998	31.989657350019684
GOTERM_BP_FAT	GO:0006090~pyruvate metabolic process	5	1.0351966873706004	0.022973549967985552	GPD2, LDHA, ENO2, PPARGC1A, ACN9	352	42	13528	4.57521645021645	1.0	0.5147061975210403	33.379458413001075
GOTERM_BP_FAT	GO:0043408~regulation of MAPKKK cascade	8	1.6563146997929608	0.023327823779670305	P2RX7, GRIN2B, HIPK2, TAOK3, BIRC7, LPAR3, TGFB2, APC	352	109	13528	2.8206839032527102	1.0	0.5154294914951636	33.800352796794485
GOTERM_BP_FAT	GO:0032583~regulation of gene-specific transcription	9	1.8633540372670807	0.023501616731025632	HES1, ETS1, GATA4, TFEB, IGF1, RORB, NR5A2, BCOR, PPARGC1A	352	134	13528	2.581241519674356	1.0	0.5134180024246328	34.00590944627192
GOTERM_BP_FAT	GO:0042391~regulation of membrane potential	9	1.8633540372670807	0.023501616731025632	P2RX7, PLP1, MPZ, EGR2, GRIN2B, PLLP, CHRNB2, CACNB4, CHRNA3	352	134	13528	2.581241519674356	1.0	0.5134180024246328	34.00590944627192
GOTERM_BP_FAT	GO:0007093~mitotic cell cycle checkpoint	5	1.0351966873706004	0.02482749183470239	CDK1, CCND1, MAD2L1, CENPF, APC	352	43	13528	4.468816067653276	1.0	0.5283955737451445	35.55442079611771
GOTERM_BP_FAT	GO:0050804~regulation of synaptic transmission	9	1.8633540372670807	0.0254054765021911	SYP, EGR1, EGR2, GRIN2B, APOE, BCAN, CHRNB2, VGF, CHRNA3	352	136	13528	2.5432820855614975	1.0	0.5320884846782312	36.21868044151022
GOTERM_BP_FAT	GO:0006468~protein amino acid phosphorylation	27	5.590062111801243	0.025472491842966814	ERBB3, ADRBK2, LPAR3, AURKA, CAMKK1, TGFB2, MASTL, GHR, AMHR2, CDK1, ITK, TRPM6, CAMK1G, MYLK3, MET, TAOK3, BIRC7, CDK2, GSG2, RPS6KA5, MAST4, P2RX7, CCND1, PRLR, HIPK2, CIT, MYLK	352	667	13528	1.5557107809731499	1.0	0.5285141552514375	36.295280091426484
GOTERM_BP_FAT	GO:0021675~nerve development	4	0.8281573498964804	0.02610334793508095	HES1, EGR2, ERBB3, CHRNB2	352	25	13528	6.149090909090909	1.0	0.5328483178905462	37.01212042062443
GOTERM_BP_FAT	GO:0006094~gluconeogenesis	4	0.8281573498964804	0.02610334793508095	GPD2, ENO2, PPARGC1A, ACN9	352	25	13528	6.149090909090909	1.0	0.5328483178905462	37.01212042062443
GOTERM_BP_FAT	GO:0019318~hexose metabolic process	11	2.2774327122153206	0.028304063037790757	GPD2, GAPDHS, LDHA, PPP1R3B, ONECUT1, PKLR, PGAM1, HK2, ENO2, PPARGC1A, ACN9	352	192	13528	2.2018229166666665	1.0	0.5578021046634529	39.45370443939198
GOTERM_BP_FAT	GO:0010648~negative regulation of cell communication	13	2.691511387163561	0.02862000498256	ONECUT1, ERBB3, TAOK3, SOCS6, PDE3B, RGS17, CCND1, P2RX7, RGS20, HIPK2, OTUD7B, RGS7, APC	352	248	13528	2.0145711143695015	1.0	0.557438530191811	39.796812276681074
GOTERM_BP_FAT	GO:0010564~regulation of cell cycle process	8	1.6563146997929608	0.028916354788640037	MAD2L1, NPM1, CENPF, IGF1, BRCA2, ANLN, MYCBP2, APC	352	114	13528	2.6969696969696972	1.0	0.5568368150457802	40.11697655429521
GOTERM_BP_FAT	GO:0010628~positive regulation of gene expression	24	4.968944099378882	0.02935010270620118	EGR1, EGR2, BLM, MITF, TFEB, RXRG, IGF1, RORB, SOX6, PPARGC1A, TRERF1, SOX8, CDK2, WT1, PPARGC1B, HES1, MURC, PRDM7, MEIS2, ETS1, HIPK2, GATA4, NR5A2, NFIB	352	581	13528	1.5875449851353465	1.0	0.557967717883161	40.58268728631026
GOTERM_BP_FAT	GO:0009725~response to hormone stimulus	17	3.5196687370600417	0.029500239390463718	ADCY1, EGR2, ERBB3, FADS1, BRCA2, PDE3B, AURKA, VGF, UBE2B, PPARGC1B, TGFB2, ALDH1A2, CCND1, ENO2, PCSK9, ASIP, GHR	352	367	13528	1.780220460738172	1.0	0.5555675964918481	40.743090453368794
GOTERM_BP_FAT	GO:0032989~cellular component morphogenesis	18	3.7267080745341614	0.030224578957688954	EGR2, ONECUT1, ERBB3, CASC5, SOX6, UBE2B, CAPN3, GAS7, MYCBP2, TGFB2, HES1, SEMA6A, P2RX7, GBX2, CHRNB2, SNAP25, MYH10, APC	352	397	13528	1.7425005724753837	1.0	0.5602342617414086	41.51124160307816
GOTERM_BP_FAT	GO:0005996~monosaccharide metabolic process	12	2.484472049689441	0.030364723777963096	GPD2, GAPDHS, LDHA, PPP1R3B, ONECUT1, SLC35D1, PKLR, PGAM1, HK2, ENO2, PPARGC1A, ACN9	352	222	13528	2.0773955773955772	1.0	0.5577564256253029	41.65877500499279
GOTERM_BP_FAT	GO:0045841~negative regulation of mitotic metaphase/anaphase transition	3	0.6211180124223602	0.031628023618288134	MAD2L1, CENPF, APC	352	11	13528	10.481404958677684	1.0	0.568603140079212	42.97293362530388
GOTERM_BP_FAT	GO:0007094~mitotic cell cycle spindle assembly checkpoint	3	0.6211180124223602	0.031628023618288134	MAD2L1, CENPF, APC	352	11	13528	10.481404958677684	1.0	0.568603140079212	42.97293362530388
GOTERM_BP_FAT	GO:0006816~calcium ion transport	9	1.8633540372670807	0.03175809637995269	TRPM6, ATP2B3, P2RX7, GRIN2B, CACNA1H, CHRNB2, CACNB4, CACNA1D, TPCN2	352	142	13528	2.4358194622279132	1.0	0.5660191739941358	43.10664664792292
GOTERM_BP_FAT	GO:0019320~hexose catabolic process	6	1.2422360248447204	0.03325088519395672	GAPDHS, LDHA, PKLR, PGAM1, HK2, ENO2	352	69	13528	3.3418972332015806	1.0	0.5789252422860647	44.620201332524324
GOTERM_BP_FAT	GO:0006281~DNA repair	14	2.898550724637681	0.03439993841444014	ESCO1, CLSPN, RAD51AP1, BLM, BRCA2, UBE2B, EEPD1, RPA1, POLE2, CRY1, POLQ, FANCB, FEN1, BARD1	352	284	13528	1.8945262483994878	1.0	0.58750240198149	45.759295831361115
GOTERM_BP_FAT	GO:0007229~integrin-mediated signaling pathway	6	1.2422360248447204	0.03507728384212574	PLP1, GAB2, ITGAX, ITGA7, CEACAM1, ITGBL1	352	70	13528	3.2941558441558443	1.0	0.5907618171492655	46.42038413448479
GOTERM_BP_FAT	GO:0043410~positive regulation of MAPKKK cascade	5	1.0351966873706004	0.035425773603945665	P2RX7, HIPK2, TAOK3, LPAR3, TGFB2	352	48	13528	4.003314393939394	1.0	0.5904892460876747	46.7575429353129
GOTERM_BP_FAT	GO:0009719~response to endogenous stimulus	18	3.7267080745341614	0.03543652698367362	ADCY1, EGR2, ERBB3, FADS1, BRCA2, PDE3B, AURKA, VGF, UBE2B, PPARGC1B, TGFB2, ALDH1A2, CCND1, TRDMT1, ENO2, PCSK9, ASIP, GHR	352	405	13528	1.7080808080808083	1.0	0.5866941252019977	46.7679147928285
GOTERM_BP_FAT	GO:0045935~positive regulation of nucleobase, nucleoside, nucleotide and nucleic acid metabolic process	25	5.175983436853002	0.03543844688897951	BLM, MITF, TFEB, RORB, SOX6, SOX8, WT1, MEIS2, APOE, GATA4, EGR1, EGR2, RXRG, IGF1, PPARGC1A, TRERF1, CDK2, PPARGC1B, HES1, MURC, PRDM7, ETS1, HIPK2, NR5A2, NFIB	352	624	13528	1.5397363053613056	1.0	0.5828522760601237	46.76976638085015
GOTERM_BP_FAT	GO:0045859~regulation of protein kinase activity	16	3.3126293995859215	0.03609781000047525	ADCY1, BLM, MET, BIRC7, LPAR3, CDC25A, TGFB2, CCNE2, CCND1, P2RX7, PRLR, APOE, NPM1, CHRNA3, APC, GHR	352	345	13528	1.7823451910408432	1.0	0.5858822417101082	47.402088261083094
GOTERM_BP_FAT	GO:0046365~monosaccharide catabolic process	6	1.2422360248447204	0.03696457149222907	GAPDHS, LDHA, PKLR, PGAM1, HK2, ENO2	352	71	13528	3.2477592829705504	1.0	0.5909288106742125	48.222534452643806
GOTERM_BP_FAT	GO:0045839~negative regulation of mitosis	3	0.6211180124223602	0.037313490101632346	MAD2L1, CENPF, APC	352	12	13528	9.607954545454545	1.0	0.5906796423503564	48.54939006509977
GOTERM_BP_FAT	GO:0014068~positive regulation of phosphoinositide 3-kinase cascade	3	0.6211180124223602	0.037313490101632346	ERBB3, IGF1, TGFB2	352	12	13528	9.607954545454545	1.0	0.5906796423503564	48.54939006509977
GOTERM_BP_FAT	GO:0051784~negative regulation of nuclear division	3	0.6211180124223602	0.037313490101632346	MAD2L1, CENPF, APC	352	12	13528	9.607954545454545	1.0	0.5906796423503564	48.54939006509977
GOTERM_BP_FAT	GO:0031577~spindle checkpoint	3	0.6211180124223602	0.037313490101632346	MAD2L1, CENPF, APC	352	12	13528	9.607954545454545	1.0	0.5906796423503564	48.54939006509977
GOTERM_BP_FAT	GO:0006110~regulation of glycolysis	3	0.6211180124223602	0.037313490101632346	GAPDHS, PGAM1, IGF1	352	12	13528	9.607954545454545	1.0	0.5906796423503564	48.54939006509977
GOTERM_BP_FAT	GO:0009896~positive regulation of catabolic process	5	1.0351966873706004	0.03781444813090423	GAPDHS, APOE, IGF1, BARD1, APC	352	49	13528	3.9216141001855287	1.0	0.5919385660464462	49.01527139106232
GOTERM_BP_FAT	GO:0051969~regulation of transmission of nerve impulse	9	1.8633540372670807	0.03782081561236046	SYP, EGR1, EGR2, GRIN2B, APOE, BCAN, CHRNB2, VGF, CHRNA3	352	147	13528	2.352968460111317	1.0	0.5883272361209757	49.021167347984
GOTERM_BP_FAT	GO:0008202~steroid metabolic process	11	2.2774327122153206	0.03809172651149313	RDH8, DHRS2, CYB5R2, PRLR, APOE, APOC1, PCSK9, OSBPL10, NR5A2, TRERF1, CYP19A1	352	202	13528	2.092821782178218	1.0	0.5873507627935699	49.27142213885786
GOTERM_BP_FAT	GO:0014070~response to organic cyclic substance	8	1.6563146997929608	0.03816482497429535	P2RX7, CCND1, FADS1, ENO2, BRCA2, CHRNB2, CHRNA3, GHR	352	121	13528	2.5409466566491363	1.0	0.5844675067690797	49.33874838911579
GOTERM_BP_FAT	GO:0030856~regulation of epithelial cell differentiation	4	0.8281573498964804	0.03845449422566005	CCND1, PRLR, APOLD1, APC	352	29	13528	5.300940438871473	1.0	0.583721248638114	49.604716494310885
GOTERM_BP_FAT	GO:0009891~positive regulation of biosynthetic process	27	5.590062111801243	0.04008084326972339	BLM, MITF, TFEB, RORB, SOX6, SOX8, WT1, TGFB2, MEIS2, APOE, NPM1, GATA4, EGR1, EGR2, RXRG, IGF1, PPARGC1A, TRERF1, CDK2, PPARGC1B, HES1, PRDM7, MURC, ETS1, HIPK2, NR5A2, NFIB	352	695	13528	1.493034663178548	1.0	0.5956373765814983	51.07371837560073
GOTERM_BP_FAT	GO:0007267~cell-cell signaling	24	4.968944099378882	0.04014860380316644	PLP1, EGR3, CPLX1, MPZ, SYT5, FGF14, FADS1, GABRA5, LPAR3, CACNB4, KCNIP2, SNAI2, VGF, PCLO, GJA3, TGFB2, P2RX7, GRIN2B, APOE, GATA4, CHRNB2, SNAP25, ASIP, CHRNA3	352	600	13528	1.5372727272727271	1.0	0.5927661159103343	51.13403830882153
GOTERM_BP_FAT	GO:0014066~regulation of phosphoinositide 3-kinase cascade	3	0.6211180124223602	0.04335566534330022	ERBB3, IGF1, TGFB2	352	13	13528	8.868881118881118	1.0	0.6180917354103936	53.91008597285143
GOTERM_BP_FAT	GO:0048469~cell maturation	6	1.2422360248447204	0.04512918561851586	HES1, PLP1, BRCA2, KCNIP2, SOX8, FARP2	352	75	13528	3.0745454545454542	1.0	0.6297217815257499	55.38070729981624
GOTERM_BP_FAT	GO:0042176~regulation of protein catabolic process	5	1.0351966873706004	0.04552227253731755	PTPN3, APOE, PCSK9, BARD1, APC	352	52	13528	3.695367132867133	1.0	0.6295652283655462	55.70061413370515
GOTERM_BP_FAT	GO:0019319~hexose biosynthetic process	4	0.8281573498964804	0.04556014728551297	GPD2, ENO2, PPARGC1A, ACN9	352	31	13528	4.958944281524927	1.0	0.6264880017406463	55.73132334843789
GOTERM_BP_FAT	GO:0043549~regulation of kinase activity	16	3.3126293995859215	0.04601205741481394	ADCY1, BLM, MET, BIRC7, LPAR3, CDC25A, TGFB2, CCNE2, CCND1, P2RX7, PRLR, APOE, NPM1, CHRNA3, APC, GHR	352	357	13528	1.7224344283167812	1.0	0.6268457519986756	56.09619150382825
GOTERM_BP_FAT	GO:0031644~regulation of neurological system process	9	1.8633540372670807	0.04606554635288967	SYP, EGR1, EGR2, GRIN2B, APOE, BCAN, CHRNB2, VGF, CHRNA3	352	153	13528	2.260695187165776	1.0	0.6239546338389418	56.1391898461562
GOTERM_BP_FAT	GO:0051173~positive regulation of nitrogen compound metabolic process	25	5.175983436853002	0.048124470485783125	BLM, MITF, TFEB, RORB, SOX6, SOX8, WT1, MEIS2, APOE, GATA4, EGR1, EGR2, RXRG, IGF1, PPARGC1A, TRERF1, CDK2, PPARGC1B, HES1, MURC, PRDM7, ETS1, HIPK2, NR5A2, NFIB	352	644	13528	1.4919184076792773	1.0	0.637134369388515	57.76445085088052
GOTERM_BP_FAT	GO:0001889~liver development	5	1.0351966873706004	0.04827201024430686	HES1, ALDH1A2, CCND1, ONECUT1, PCSK9	352	53	13528	3.6256432246998282	1.0	0.6350188296326866	57.87870753689347
GOTERM_BP_FAT	GO:0048514~blood vessel morphogenesis	11	2.2774327122153206	0.04869209620680351	SHB, APOE, MYO1E, ITGA7, CSPG4, GBX2, APOLD1, JAG1, WT1, CEACAM1, TGFB2	352	211	13528	2.0035545023696684	1.0	0.6350457258893669	58.202433565955225
GOTERM_BP_FAT	GO:0051276~chromosome organization	20	4.140786749482402	0.04896112448563396	BLM, CENPF, BRCA2, SOX6, NAP1L5, UBE2B, GSG2, RPA1, RPS6KA5, PRDM7, NCAPH, TEX15, MAD2L1, HJURP, NPM1, H2AFZ, PBRM1, CHD1, BCOR, APC	352	485	13528	1.584817244611059	1.0	0.6339113726019348	58.40851809476941
GOTERM_BP_FAT	GO:0007271~synaptic transmission, cholinergic	3	0.6211180124223602	0.04973232479527147	APOE, CHRNB2, CHRNA3	352	14	13528	8.235389610389609	1.0	0.6366235121142755	58.993986799572376
GOTERM_BP_FAT	GO:0000079~regulation of cyclin-dependent protein kinase activity	5	1.0351966873706004	0.05111167406642733	CCNE2, CCND1, BLM, CDC25A, APC	352	54	13528	3.5585016835016834	1.0	0.6437931272459848	60.021812968994084
GOTERM_BP_FAT	GO:0019228~regulation of action potential in neuron	5	1.0351966873706004	0.05111167406642733	P2RX7, PLP1, MPZ, EGR2, PLLP	352	54	13528	3.5585016835016834	1.0	0.6437931272459848	60.021812968994084
GOTERM_BP_FAT	GO:0042977~activation of JAK2 kinase activity	2	0.4140786749482402	0.05122103516159137	PRLR, GHR	352	2	13528	38.43181818181818	1.0	0.6414704885095759	60.102255842242045
GOTERM_BP_FAT	GO:0051782~negative regulation of cell division	2	0.4140786749482402	0.05122103516159137	BLM, ASPM	352	2	13528	38.43181818181818	1.0	0.6414704885095759	60.102255842242045
GOTERM_BP_FAT	GO:0008630~DNA damage response, signal transduction resulting in induction of apoptosis	4	0.8281573498964804	0.053266607704482986	TXNDC12, HIPK2, BRCA2, IFI16	352	33	13528	4.658402203856749	1.0	0.6531547469937455	61.57908815229762
GOTERM_BP_FAT	GO:0048489~synaptic vesicle transport	4	0.8281573498964804	0.053266607704482986	SYP, P2RX7, PCLO, SNAP25	352	33	13528	4.658402203856749	1.0	0.6531547469937455	61.57908815229762
GOTERM_BP_FAT	GO:0015914~phospholipid transport	4	0.8281573498964804	0.053266607704482986	P2RX7, APOE, ATP10A, APOC1	352	33	13528	4.658402203856749	1.0	0.6531547469937455	61.57908815229762
GOTERM_BP_FAT	GO:0006163~purine nucleotide metabolic process	10	2.070393374741201	0.05360189207945503	ADCY1, ATP2B3, UCN2, FIGNL1, ATP10A, ATP1A3, PDE3B, CACNB4, ATP13A3, ATP12A	352	186	13528	2.066226783968719	1.0	0.6524502779924817	61.81617952862588
GOTERM_BP_FAT	GO:0051592~response to calcium ion	5	1.0351966873706004	0.05404094440825862	P2RX7, CCND1, S100A16, KCNIP2, CAPN3	352	55	13528	3.4938016528925617	1.0	0.6524828554873972	62.12456356619859
GOTERM_BP_FAT	GO:0031328~positive regulation of cellular biosynthetic process	26	5.383022774327122	0.05412328217283251	BLM, MITF, TFEB, RORB, SOX6, SOX8, WT1, MEIS2, APOE, NPM1, GATA4, EGR1, EGR2, RXRG, IGF1, PPARGC1A, TRERF1, CDK2, PPARGC1B, HES1, MURC, PRDM7, ETS1, HIPK2, NR5A2, NFIB	352	685	13528	1.4587259455872597	1.0	0.6500343497483699	62.18213433304929
GOTERM_BP_FAT	GO:0006633~fatty acid biosynthetic process	6	1.2422360248447204	0.05428889294819082	LPL, PLP1, TBXAS1, PTGDS, FADS1, ACSL3	352	79	13528	2.9188722669735325	1.0	0.6481890965498837	62.29768003601801
GOTERM_BP_FAT	GO:0010557~positive regulation of macromolecule biosynthetic process	25	5.175983436853002	0.05556906997524905	BLM, MITF, TFEB, RORB, SOX6, SOX8, WT1, TGFB2, MEIS2, GATA4, EGR1, EGR2, RXRG, IGF1, PPARGC1A, TRERF1, CDK2, PPARGC1B, HES1, MURC, PRDM7, ETS1, HIPK2, NR5A2, NFIB	352	654	13528	1.4691061996107868	1.0	0.6540233336043226	63.179688122827
GOTERM_BP_FAT	GO:0010033~response to organic substance	27	5.590062111801243	0.056194567822452926	ADCY1, ERBB3, PDE3B, AURKA, C1S, VGF, LIN28B, TGFB2, ALDH1A2, GRIN2B, APOE, TRDMT1, ENO2, COL6A2, PCSK9, CHRNA3, GHR, EGR1, EGR2, FADS1, BRCA2, UBE2B, PPARGC1B, P2RX7, CCND1, CHRNB2, ASIP	352	721	13528	1.4391943008447863	1.0	0.6553044980228788	63.603530394667615
GOTERM_BP_FAT	GO:0001654~eye development	8	1.6563146997929608	0.05627864221516364	ALDH1A2, MEIS2, MITF, RORB, WT1, MYH10, TGFB2, APC	352	132	13528	2.3292011019283745	1.0	0.6529437063749348	63.66014791825081
GOTERM_BP_FAT	GO:0010165~response to X-ray	3	0.6211180124223602	0.0564221513205174	CCND1, BLM, BRCA2	352	15	13528	7.686363636363636	1.0	0.6510030303113741	63.75659828551067
GOTERM_BP_FAT	GO:0016079~synaptic vesicle exocytosis	3	0.6211180124223602	0.0564221513205174	P2RX7, PCLO, SNAP25	352	15	13528	7.686363636363636	1.0	0.6510030303113741	63.75659828551067
GOTERM_BP_FAT	GO:0042771~DNA damage response, signal transduction by p53 class mediator resulting in induction of apoptosis	3	0.6211180124223602	0.0564221513205174	HIPK2, BRCA2, IFI16	352	15	13528	7.686363636363636	1.0	0.6510030303113741	63.75659828551067
GOTERM_BP_FAT	GO:0051783~regulation of nuclear division	5	1.0351966873706004	0.05705941459284408	MAD2L1, CENPF, IGF1, MYCBP2, APC	352	56	13528	3.431412337662337	1.0	0.6523705191777289	64.18198567142788
GOTERM_BP_FAT	GO:0007088~regulation of mitosis	5	1.0351966873706004	0.05705941459284408	MAD2L1, CENPF, IGF1, MYCBP2, APC	352	56	13528	3.431412337662337	1.0	0.6523705191777289	64.18198567142788
GOTERM_BP_FAT	GO:0048870~cell motility	14	2.898550724637681	0.05743784305222724	PLXNA2, MDGA1, MET, TGFB2, GAPDHS, TNS3, TNS1, GAB2, ETS1, DNER, GBX2, CEACAM1, MYH10, APC	352	307	13528	1.7525910571513177	1.0	0.652013070553484	64.43236287302098
GOTERM_BP_FAT	GO:0051674~localization of cell	14	2.898550724637681	0.05743784305222724	PLXNA2, MDGA1, MET, TGFB2, GAPDHS, TNS3, TNS1, GAB2, ETS1, DNER, GBX2, CEACAM1, MYH10, APC	352	307	13528	1.7525910571513177	1.0	0.652013070553484	64.43236287302098
GOTERM_BP_FAT	GO:0060249~anatomical structure homeostasis	7	1.4492753623188406	0.05764961046958448	RPA1, COL9A1, P2RX7, TEX15, BLM, BARD1, APC	352	106	13528	2.5379502572898796	1.0	0.650569049903889	64.57175221346526
GOTERM_BP_FAT	GO:0046164~alcohol catabolic process	6	1.2422360248447204	0.05924377549839677	GAPDHS, LDHA, PKLR, PGAM1, HK2, ENO2	352	81	13528	2.846801346801347	1.0	0.6580789468684982	65.60465158042271
GOTERM_BP_FAT	GO:0048666~neuron development	15	3.1055900621118013	0.059590038985237306	EGR2, ERBB3, RORB, KCNIP2, GAS7, TGFB2, FARP2, MYCBP2, HES1, SEMA6A, GBX2, CHRNB2, SNAP25, MYH10, APC	352	339	13528	1.7005229283990344	1.0	0.6574937515462255	65.82521933204187
GOTERM_BP_FAT	GO:0016051~carbohydrate biosynthetic process	7	1.4492753623188406	0.05980794698129291	GPD2, GCNT2, SLC35D1, B3GALT1, ENO2, PPARGC1A, ACN9	352	107	13528	2.514231096006797	1.0	0.656105486142668	65.96334102779203
GOTERM_BP_FAT	GO:0044057~regulation of system process	14	2.898550724637681	0.05985997511708337	EGR1, EGR2, BCAN, VGF, KCNIP2, TGFB2, SYP, GRIN2B, APOE, CACNA1H, CHRNB2, SCN5A, S100A1, CHRNA3	352	309	13528	1.7412474257134452	1.0	0.6536845350380686	65.99624131239206
GOTERM_BP_FAT	GO:0042060~wound healing	10	2.070393374741201	0.06131463349161697	IGSF10, PLSCR1, PROCR, ERBB3, MYH2, P2RY1, IGF1, MYH10, RAB27A, TGFB2	352	191	13528	2.0121370775821035	1.0	0.6600493139537277	66.9040571873777
GOTERM_BP_FAT	GO:0010906~regulation of glucose metabolic process	4	0.8281573498964804	0.061555148355167705	GAPDHS, PGAM1, IGF1, PPARGC1A	352	35	13528	4.392207792207793	1.0	0.6588246690218057	67.0519371083789
GOTERM_BP_FAT	GO:0051338~regulation of transferase activity	16	3.3126293995859215	0.06224050789702255	ADCY1, BLM, MET, BIRC7, LPAR3, CDC25A, TGFB2, CCNE2, CCND1, P2RX7, PRLR, APOE, NPM1, CHRNA3, APC, GHR	352	372	13528	1.6529814271749756	1.0	0.6603315640842784	67.46991933199318
GOTERM_BP_FAT	GO:0007588~excretion	5	1.0351966873706004	0.06336190934035858	AQP5, CHRNB2, AQP6, CHRNA3, AQP2	352	58	13528	3.3130877742946705	1.0	0.6644286142178827	68.14306787118434
GOTERM_BP_FAT	GO:0043471~regulation of cellular carbohydrate catabolic process	3	0.6211180124223602	0.06340470328493275	GAPDHS, PGAM1, IGF1	352	16	13528	7.205965909090908	1.0	0.6620379625122264	68.16849398656205
GOTERM_BP_FAT	GO:0007622~rhythmic behavior	3	0.6211180124223602	0.06340470328493275	EGR2, PTGDS, CHRNB2	352	16	13528	7.205965909090908	1.0	0.6620379625122264	68.16849398656205
GOTERM_BP_FAT	GO:0043470~regulation of carbohydrate catabolic process	3	0.6211180124223602	0.06340470328493275	GAPDHS, PGAM1, IGF1	352	16	13528	7.205965909090908	1.0	0.6620379625122264	68.16849398656205
GOTERM_BP_FAT	GO:0045860~positive regulation of protein kinase activity	11	2.2774327122153206	0.06572733031285885	ADCY1, P2RX7, CCND1, PRLR, MET, NPM1, BIRC7, LPAR3, CHRNA3, GHR, TGFB2	352	223	13528	1.8957399103139014	1.0	0.6730341792476554	69.52014530167823
GOTERM_BP_FAT	GO:0010741~negative regulation of protein kinase cascade	4	0.8281573498964804	0.06591107523194652	P2RX7, TAOK3, OTUD7B, APC	352	36	13528	4.27020202020202	1.0	0.6714881915387421	69.6247328842636
GOTERM_BP_FAT	GO:0010927~cellular component assembly involved in morphogenesis	4	0.8281573498964804	0.06591107523194652	CASC5, CAPN3, UBE2B, MYH10	352	36	13528	4.27020202020202	1.0	0.6714881915387421	69.6247328842636
GOTERM_BP_FAT	GO:0007422~peripheral nervous system development	4	0.8281573498964804	0.06591107523194652	EGR3, EGR2, ERBB3, SOX8	352	36	13528	4.27020202020202	1.0	0.6714881915387421	69.6247328842636
GOTERM_BP_FAT	GO:0055085~transmembrane transport	22	4.554865424430641	0.06655581910527411	TRPM6, SLC5A4, SLC39A11, SCN3A, KCNAB2, AQP5, AQP6, NUPL1, ABCB5, TRPM1, AQP2, TPCN2, KCNU1, UCP2, SLC37A2, CACNA1H, SLC5A9, NUP54, KCNG3, CACNA1D, SCN5A, SLC5A10	352	569	13528	1.4859402460456943	1.0	0.672588235545426	69.98905076665089
GOTERM_BP_FAT	GO:0006796~phosphate metabolic process	34	7.039337474120083	0.06844691722035937	SLC20A1, ERBB3, HK2, ADRBK2, LPAR3, AURKA, CAMKK1, TGFB2, MASTL, GHR, AMHR2, GPD2, CDK1, ITK, TRPM6, CAMK1G, PTPN3, MYLK3, TAOK3, MET, BIRC7, GSG2, CDC25A, CDK2, RPS6KA5, MAST4, P2RX7, CCND1, PRLR, PPEF1, HIPK2, GK, CIT, MYLK	352	973	13528	1.3429412314304399	1.0	0.6806204693919097	71.03401578902775
GOTERM_BP_FAT	GO:0006793~phosphorus metabolic process	34	7.039337474120083	0.06844691722035937	SLC20A1, ERBB3, HK2, ADRBK2, LPAR3, AURKA, CAMKK1, TGFB2, MASTL, GHR, AMHR2, GPD2, CDK1, ITK, TRPM6, CAMK1G, PTPN3, MYLK3, TAOK3, MET, BIRC7, GSG2, CDC25A, CDK2, RPS6KA5, MAST4, P2RX7, CCND1, PRLR, PPEF1, HIPK2, GK, CIT, MYLK	352	973	13528	1.3429412314304399	1.0	0.6806204693919097	71.03401578902775
GOTERM_BP_FAT	GO:0048871~multicellular organismal homeostasis	6	1.2422360248447204	0.06990130742652173	RPA1, COL9A1, P2RX7, TEX15, PPARGC1A, BARD1	352	85	13528	2.71283422459893	1.0	0.6860202501987196	71.81423055958471
GOTERM_BP_FAT	GO:0044275~cellular carbohydrate catabolic process	6	1.2422360248447204	0.06990130742652173	GAPDHS, LDHA, PKLR, PGAM1, HK2, ENO2	352	85	13528	2.71283422459893	1.0	0.6860202501987196	71.81423055958471
GOTERM_BP_FAT	GO:0046364~monosaccharide biosynthetic process	4	0.8281573498964804	0.07040427142518244	GPD2, ENO2, PPARGC1A, ACN9	352	37	13528	4.1547911547911545	1.0	0.68620803817695	72.07940595024573
GOTERM_BP_FAT	GO:0048873~homeostasis of number of cells within a tissue	3	0.6211180124223602	0.07066038368871846	RPA1, P2RX7, TEX15	352	17	13528	6.782085561497325	1.0	0.6850782596560836	72.2135293446824
GOTERM_BP_FAT	GO:0008306~associative learning	3	0.6211180124223602	0.07066038368871846	GRIN2B, GABRA5, CHRNB2	352	17	13528	6.782085561497325	1.0	0.6850782596560836	72.2135293446824
GOTERM_BP_FAT	GO:0007274~neuromuscular synaptic transmission	3	0.6211180124223602	0.07066038368871846	EGR3, CHRNB2, CHRNA3	352	17	13528	6.782085561497325	1.0	0.6850782596560836	72.2135293446824
GOTERM_BP_FAT	GO:0060070~Wnt receptor signaling pathway through beta-catenin	3	0.6211180124223602	0.07066038368871846	CCND1, UBE2B, APC	352	17	13528	6.782085561497325	1.0	0.6850782596560836	72.2135293446824
GOTERM_BP_FAT	GO:0043409~negative regulation of MAPKKK cascade	3	0.6211180124223602	0.07066038368871846	P2RX7, TAOK3, APC	352	17	13528	6.782085561497325	1.0	0.6850782596560836	72.2135293446824
GOTERM_BP_FAT	GO:0001775~cell activation	13	2.691511387163561	0.07136723981139381	EGR1, BLM, ONECUT1, SWAP70, APOLD1, DHRS2, PLSCR1, SHB, P2RX7, PRLR, CHRNB2, APC, RAB27A	352	287	13528	1.740814063984796	1.0	0.6863527932851738	72.5805580188944
GOTERM_BP_FAT	GO:0015672~monovalent inorganic cation transport	14	2.898550724637681	0.07150870033380656	SLC5A4, SCN3A, SLC20A1, KCNAB2, ATP1A3, KCNIP2, ATP12A, CDK2, KCNU1, UCP2, SLC5A9, KCNG3, SCN5A, SLC5A10	352	318	13528	1.6919668381932533	1.0	0.6846340799628998	72.65345910177157
GOTERM_BP_FAT	GO:0009187~cyclic nucleotide metabolic process	4	0.8281573498964804	0.07503169683976521	ADCY1, UCN2, PDE3B, CACNB4	352	38	13528	4.045454545454546	1.0	0.700310720053157	74.41115999807435
GOTERM_BP_FAT	GO:0010675~regulation of cellular carbohydrate metabolic process	4	0.8281573498964804	0.07503169683976521	GAPDHS, PGAM1, IGF1, PPARGC1A	352	38	13528	4.045454545454546	1.0	0.700310720053157	74.41115999807435
GOTERM_BP_FAT	GO:0046649~lymphocyte activation	10	2.070393374741201	0.07506170658901273	EGR1, SHB, P2RX7, BLM, PRLR, ONECUT1, SWAP70, CHRNB2, RAB27A, APC	352	199	13528	1.931247144814984	1.0	0.6980438882100883	74.42566437423478
GOTERM_BP_FAT	GO:0018242~protein amino acid O-linked glycosylation via serine	2	0.4140786749482402	0.07584187034268132	GALNT3, GALNT2	352	3	13528	25.62121212121212	1.0	0.6995300597849308	74.80002606558365
GOTERM_BP_FAT	GO:0034447~very-low-density lipoprotein particle clearance	2	0.4140786749482402	0.07584187034268132	APOE, APOC1	352	3	13528	25.62121212121212	1.0	0.6995300597849308	74.80002606558365
GOTERM_BP_FAT	GO:0021555~midbrain-hindbrain boundary morphogenesis	2	0.4140786749482402	0.07584187034268132	HES1, GBX2	352	3	13528	25.62121212121212	1.0	0.6995300597849308	74.80002606558365
GOTERM_BP_FAT	GO:0042976~activation of Janus kinase activity	2	0.4140786749482402	0.07584187034268132	PRLR, GHR	352	3	13528	25.62121212121212	1.0	0.6995300597849308	74.80002606558365
GOTERM_BP_FAT	GO:0060084~synaptic transmission involved in micturition	2	0.4140786749482402	0.07584187034268132	CHRNB2, CHRNA3	352	3	13528	25.62121212121212	1.0	0.6995300597849308	74.80002606558365
GOTERM_BP_FAT	GO:0046931~pore complex biogenesis	2	0.4140786749482402	0.07584187034268132	P2RX7, AHCTF1	352	3	13528	25.62121212121212	1.0	0.6995300597849308	74.80002606558365
GOTERM_BP_FAT	GO:0048478~replication fork protection	2	0.4140786749482402	0.07584187034268132	BLM, BRCA2	352	3	13528	25.62121212121212	1.0	0.6995300597849308	74.80002606558365
GOTERM_BP_FAT	GO:0018243~protein amino acid O-linked glycosylation via threonine	2	0.4140786749482402	0.07584187034268132	GALNT3, GALNT2	352	3	13528	25.62121212121212	1.0	0.6995300597849308	74.80002606558365
GOTERM_BP_FAT	GO:0032803~regulation of low-density lipoprotein receptor catabolic process	2	0.4140786749482402	0.07584187034268132	APOE, PCSK9	352	3	13528	25.62121212121212	1.0	0.6995300597849308	74.80002606558365
GOTERM_BP_FAT	GO:0006302~double-strand break repair	5	1.0351966873706004	0.07701040369644012	RPA1, RAD51AP1, BLM, BRCA2, FEN1	352	62	13528	3.0993401759530794	1.0	0.702891701245321	75.35109540579728
GOTERM_BP_FAT	GO:0043066~negative regulation of apoptosis	15	3.1055900621118013	0.0780095191270222	CDK1, SNCB, ERBB3, BCL2A1, MITF, BIRC7, IGF1, DHRS2, PRLR, APOE, HIPK2, NPM1, BNIP3L, BARD1, APC	352	354	13528	1.6284668721109399	1.0	0.7053660862929192	75.81323925785694
GOTERM_BP_FAT	GO:0051146~striated muscle cell differentiation	6	1.2422360248447204	0.07854274656223922	DNER, CACNA1H, IGF1, CACNB4, CAPN3, MYH10	352	88	13528	2.620351239669421	1.0	0.7055759110263158	76.05652963142305
GOTERM_BP_FAT	GO:0008610~lipid biosynthetic process	14	2.898550724637681	0.07862430280954456	LPL, PLP1, CYB5R2, TBXAS1, GBGT1, FADS1, TRERF1, ALDH1A2, RDH8, P2RX7, PTGDS, PRLR, ACSL3, CYP19A1	352	323	13528	1.6657754010695187	1.0	0.7036339721027829	76.09353643108022
GOTERM_BP_FAT	GO:0033674~positive regulation of kinase activity	11	2.2774327122153206	0.07897170898241379	ADCY1, P2RX7, CCND1, PRLR, MET, NPM1, BIRC7, LPAR3, CHRNA3, GHR, TGFB2	352	231	13528	1.83008658008658	1.0	0.702972065055957	76.25057152191732
GOTERM_BP_FAT	GO:0006109~regulation of carbohydrate metabolic process	4	0.8281573498964804	0.07979019643509742	GAPDHS, PGAM1, IGF1, PPARGC1A	352	39	13528	3.9417249417249423	1.0	0.7045432625588621	76.61670957492879
GOTERM_BP_FAT	GO:0001894~tissue homeostasis	5	1.0351966873706004	0.08063517080265667	RPA1, COL9A1, P2RX7, TEX15, BARD1	352	63	13528	3.0501443001443	1.0	0.706213146449334	76.98910929598115
GOTERM_BP_FAT	GO:0000902~cell morphogenesis	15	3.1055900621118013	0.08106073359911081	EGR2, ONECUT1, ERBB3, SOX6, GAS7, TGFB2, MYCBP2, HES1, SEMA6A, P2RX7, GBX2, CHRNB2, SNAP25, MYH10, APC	352	356	13528	1.6193181818181819	1.0	0.7059190530945787	77.17454056640183
GOTERM_BP_FAT	GO:0031668~cellular response to extracellular stimulus	5	1.0351966873706004	0.08434309354005651	P2RX7, LDHA, FADS1, PCSK9, AQP2	352	64	13528	3.002485795454545	1.0	0.7185311704490955	78.55816024805418
GOTERM_BP_FAT	GO:0043523~regulation of neuron apoptosis	6	1.2422360248447204	0.08460795103867132	SNCB, ERBB3, HIPK2, PCSK9, GHR, TGFB2	352	90	13528	2.562121212121212	1.0	0.7174771476796282	78.66628771422704
GOTERM_BP_FAT	GO:0043069~negative regulation of programmed cell death	15	3.1055900621118013	0.0848742569228953	CDK1, SNCB, ERBB3, BCL2A1, MITF, BIRC7, IGF1, DHRS2, PRLR, APOE, HIPK2, NPM1, BNIP3L, BARD1, APC	352	359	13528	1.6057862750063305	1.0	0.7164389781141942	78.77448804448345
GOTERM_BP_FAT	GO:0045445~myoblast differentiation	3	0.6211180124223602	0.08591678677147173	LGALS1, IGF1, JAG1	352	19	13528	6.068181818181818	1.0	0.7188013440014691	79.19311198509406
GOTERM_BP_FAT	GO:0048483~autonomic nervous system development	3	0.6211180124223602	0.08591678677147173	HES1, EGR2, GBX2	352	19	13528	6.068181818181818	1.0	0.7188013440014691	79.19311198509406
GOTERM_BP_FAT	GO:0010907~positive regulation of glucose metabolic process	3	0.6211180124223602	0.08591678677147173	GAPDHS, IGF1, PPARGC1A	352	19	13528	6.068181818181818	1.0	0.7188013440014691	79.19311198509406
GOTERM_BP_FAT	GO:0060548~negative regulation of cell death	15	3.1055900621118013	0.08649436733143166	CDK1, SNCB, ERBB3, BCL2A1, MITF, BIRC7, IGF1, DHRS2, PRLR, APOE, HIPK2, NPM1, BNIP3L, BARD1, APC	352	360	13528	1.6013257575757576	1.0	0.7191206446496712	79.42167390822848
GOTERM_BP_FAT	GO:0015674~di-, tri-valent inorganic cation transport	9	1.8633540372670807	0.0880697948808217	TRPM6, ATP2B3, P2RX7, GRIN2B, CACNA1H, CHRNB2, CACNB4, CACNA1D, TPCN2	352	176	13528	1.9652634297520661	1.0	0.7236855062515107	80.03313302362264
GOTERM_BP_FAT	GO:0001701~in utero embryonic development	9	1.8633540372670807	0.0880697948808217	RPA1, HES1, GRIN2B, MYO1E, GATA4, TFEB, BRCA2, SOX8, MYH10	352	176	13528	1.9652634297520661	1.0	0.7236855062515107	80.03313302362264
GOTERM_BP_FAT	GO:0014706~striated muscle tissue development	7	1.4492753623188406	0.08941037627281133	COL19A1, ERBB3, DNER, RXRG, CACNB4, MYH10, TGFB2	352	119	13528	2.2606951871657754	1.0	0.727159568213301	80.53991285085633
GOTERM_BP_FAT	GO:0032940~secretion by cell	10	2.070393374741201	0.09057112631274603	P2RX7, PPY, CPLX1, NOX5, USE1, VGF, PCLO, SNAP25, MYH10, RAB27A	352	207	13528	1.8566095740008781	1.0	0.7298216676625048	80.96889122118124
[truncated: 22 more rows]

## Sheet: 501M_shMITF_Up-List
Ensembl gene id	Gene name	Description	Average log2 change (shMITF/shControl)	Adjusted p-value
ENSG00000002587	HS3ST1	heparan sulfate (glucosamine) 3-O-sulfotransferase 1	1.67671	9.97409e-10
[truncated: 746 more rows]

## Sheet: 501M_shMITF_Up-Ontology
Category	Term	Count	%	PValue	Genes	List Total	Pop Hits	Pop Total	Fold Enrichment	Bonferroni	Benjamini	FDR
[truncated: 263 more rows]

[truncated: 16 more sheets: 501M_BRG1-MITF_ComDown-List, 501M_BRG1-MITF_ComDown-Ontology, 501M_BRG1-MITF_ComUP-List, 501M_BRG1-MITF_ComUP-Ontology, Hermes shBRG1_Down-List, Hermes shBRG1_Down-Ontology, Hermes shBRG1_Up-List, Hermes shBRG1_Up-Ontology, Hermes shMITF_Down-List, Hermes shMITF_Down-Ontology, Hermes shMITF_Up-List, Hermes shMITF_Up-Ontology, Hermes BRG1-MITF_ComDown-List, HermeBRG1-MITF_ComDown-Ontology, Hermes BRG1-MITF_ComUp-List,  HermesBRG1-MITF_ComUp-Ontology]
