# Supplementary material for: Transcription factor MITF and remodeller BRG1 define chromatin organisation at regulatory elements in melanoma cells
Source: eLife. 2015 Mar 24;4:e06857. doi: 10.7554/eLife.06857 (PMC4407272; doi:10.7554/eLife.06857)
Supplement: Supplementary file 3. — Excel spread sheet of genes with associated BRG1 occupancy (either ±10 kb, or ±30 kb with respect to TSS) and regulated in shBRG1 along with the appropriate gene ontology as described in Figure S5E. DOI: http://dx.doi.org/10.7554/eLife.06857.021 [file elife06857s003.xlsx]

## Sheet: BRG1-10kb-bound_Down-List
Ensembl gene id	Gene name	Description	Average log2 change (shBRG1/shControl )	Adjusted p-value
ENSG00000019549	SNAI2	snail homolog 2 (Drosophila)	-2.58691	0
ENSG00000033627	ATP6V0A1	ATPase, H+ transporting, lysosomal V0 subunit a1	-1.16254	6.06e-217
ENSG00000055163	CYFIP2	cytoplasmic FMR1 interacting protein 2	-1.20786	7.67e-77
ENSG00000058453	CROCC	ciliary rootlet coiled-coil, rootletin	-1.97327	0
ENSG00000058668	ATP2B4	ATPase, Ca++ transporting, plasma membrane 4	-1.0469	1.2e-56
ENSG00000065361	ERBB3	v-erb-b2 erythroblastic leukemia viral oncogene homolog 3 (avian)	-1.23154	4.02e-18
ENSG00000079385	CEACAM1	carcinoembryonic antigen-related cell adhesion molecule 1 (biliary glycoprotein)	-3.60523	3.31e-258
ENSG00000080166	DCT	dopachrome tautomerase (dopachrome delta-isomerase, tyrosine-related protein 2)	-5.00238	3.18e-190
ENSG00000086991	NOX4	NADPH oxidase 4	-4.61881	0
ENSG00000088882	CPXM1	carboxypeptidase X (M14 family), member 1	-4.88801	0
ENSG00000089041	P2RX7	purinergic receptor P2X, ligand-gated ion channel, 7	-2.77447	8.34e-106
ENSG00000092621	PHGDH	phosphoglycerate dehydrogenase	-1.47957	1.1e-71
ENSG00000096696	DSP	desmoplakin	-1.79566	7.78e-30
ENSG00000100097	LGALS1	lectin, galactoside-binding, soluble, 1	-1.39971	1.17e-44
ENSG00000100234	TIMP3	TIMP metallopeptidase inhibitor 3	-1.35619	1.62e-43
ENSG00000101197	BIRC7	baculoviral IAP repeat containing 7	-2.88293	0
ENSG00000103381	CPPED1	calcineurin-like phosphoesterase domain containing 1	-1.42464	1.67e-139
ENSG00000103994	ZFP106	zinc finger protein 106 homolog (mouse)	-1.75751	3.86e-298
ENSG00000104044	OCA2	oculocutaneous albinism II	-4.01373	0
ENSG00000104490	NCALD	neurocalcin delta	-3.24825	0
ENSG00000105559	PLEKHA4	pleckstrin homology domain containing, family A (phosphoinositide binding specific) member 4	-1.20881	1.85e-121
ENSG00000106624	AEBP1	AE binding protein 1	-3.83487	0
ENSG00000107518	ATRNL1	attractin-like 1	-2.53199	2.47e-274
ENSG00000108828	VAT1	vesicle amine transport protein 1 homolog (T. californica)	-1.58128	0
ENSG00000109819	PPARGC1A	peroxisome proliferator-activated receptor gamma, coactivator 1 alpha	-3.3961	7.21e-203
ENSG00000111275	ALDH2	aldehyde dehydrogenase 2 family (mitochondrial)	-2.79297	0
ENSG00000112414	GPR126	G protein-coupled receptor 126	-1.55477	1.35e-50
ENSG00000115415	STAT1	signal transducer and activator of transcription 1, 91kDa	-1.64872	1.2e-123
ENSG00000115457	IGFBP2	insulin-like growth factor binding protein 2, 36kDa	-2.05574	7.37e-300
ENSG00000115561	CHMP3	charged multivesicular body protein 3	-1.03025	1.65e-81
ENSG00000115902	SLC1A4	solute carrier family 1 (glutamate/neutral amino acid transporter), member 4	-3.88332	0
ENSG00000115935	WIPF1	WAS/WASL interacting protein family, member 1	-1.69432	3.63e-76
ENSG00000116679	IVNS1ABP	influenza virus NS1A binding protein	-1.23567	4.97e-232
ENSG00000118503	TNFAIP3	tumor necrosis factor, alpha-induced protein 3	-1.41815	0
ENSG00000119508	NR4A3	nuclear receptor subfamily 4, group A, member 3	-1.56802	2.6e-180
ENSG00000119655	NPC2	Niemann-Pick disease, type C2	-1.44885	0
ENSG00000122729	ACO1	aconitase 1, soluble	-1.6464	0
ENSG00000126217	MCF2L	MCF.2 cell line derived transforming sequence-like	-1.39107	2.22e-67
ENSG00000126709	IFI6	interferon, alpha-inducible protein 6	-1.43111	3.22e-51
ENSG00000128564	VGF	VGF nerve growth factor inducible	-2.01827	1.6e-277
ENSG00000128596	CCDC136	coiled-coil domain containing 136	-2.40319	1.73e-183
ENSG00000129657	SEC14L1	SEC14-like 1 (S. cerevisiae)	-1.07877	1.18e-150
ENSG00000131634	TMEM204	transmembrane protein 204	-1.84315	2.27e-243
ENSG00000132185	FCRLA	Fc receptor-like A	-2.53973	2.23e-182
ENSG00000132688	NES	nestin	-2.29086	1.17e-153
ENSG00000133195	SLC39A11	solute carrier family 39 (metal ion transporter), member 11	-2.04495	0
ENSG00000134121	CHL1	cell adhesion molecule with homology to L1CAM (close homolog of L1)	-3.38701	0
ENSG00000134574	DDB2	damage-specific DNA binding protein 2, 48kDa	-1.16378	3.68e-34
ENSG00000134802	SLC43A3	solute carrier family 43, member 3	-1.68804	8.51e-31
ENSG00000135914	HTR2B	5-hydroxytryptamine (serotonin) receptor 2B, G protein-coupled	-1.70771	1.19e-12
ENSG00000136732	GYPC	glycophorin C (Gerbich blood group)	-1.10438	4.31e-42
ENSG00000137571	SLCO5A1	solute carrier organic anion transporter family, member 5A1	-2.61084	2.75e-298
ENSG00000141424	SLC39A6	solute carrier family 39 (zinc transporter), member 6	-2.79303	0
ENSG00000142156	COL6A1	collagen, type VI, alpha 1	-2.47419	9.52e-199
ENSG00000143153	ATP1B1	ATPase, Na+/K+ transporting, beta 1 polypeptide	-1.9449	0
ENSG00000143653	SCCPDH	saccharopine dehydrogenase (putative)	-1.31661	3.7e-12
ENSG00000143772	ITPKB	inositol-trisphosphate 3-kinase B	-2.74742	0
ENSG00000144668	ITGA9	integrin, alpha 9	-2.63935	3.35e-101
ENSG00000147439	BIN3	bridging integrator 3	-1.03977	2.86e-119
ENSG00000151692	RNF144A	ring finger protein 144A	-2.08645	7.87e-292
ENSG00000152078	TMEM56	transmembrane protein 56	-1.77851	1.85e-93
ENSG00000154856	APCDD1	adenomatosis polyposis coli down-regulated 1	-2.467	0
ENSG00000156535	CD109	CD109 molecule	-1.81449	1.29e-82
ENSG00000157827	FMNL2	formin-like 2	-1.342	2.99e-96
ENSG00000162777	DENND2D	DENN/MADD domain containing 2D	-4.12892	0
ENSG00000163430	FSTL1	follistatin-like 1	-4.3917	0
ENSG00000163513	TGFBR2	transforming growth factor, beta receptor II (70/80kDa)	-1.46941	2.13e-130
ENSG00000163599	CTLA4	cytotoxic T-lymphocyte-associated protein 4	-3.9777	0
ENSG00000164120	HPGD	hydroxyprostaglandin dehydrogenase 15-(NAD)	-3.01575	1.2e-238
ENSG00000164175	SLC45A2	solute carrier family 45, member 2	-2.4158	7.36e-261
ENSG00000164684	ZNF704	zinc finger protein 704	-1.41188	5.41e-153
ENSG00000165716	FAM69B	family with sequence similarity 69, member B	-3.04775	0
ENSG00000166340	TPP1	tripeptidyl peptidase I	-1.04192	0
ENSG00000167106	FAM102A	family with sequence similarity 102, member A	-1.10812	2.84e-118
ENSG00000168297	PXK	PX domain containing serine/threonine kinase	-1.4236	1.62e-119
ENSG00000168394	TAP1	transporter 1, ATP-binding cassette, sub-family B (MDR/TAP)	-1.25508	2.11e-173
ENSG00000168710	AHCYL1	adenosylhomocysteinase-like 1	-1.78113	0
ENSG00000169562	GJB1	gap junction protein, beta 1, 32kDa	-1.25462	1.32e-70
ENSG00000170004	CHD3	chromodomain helicase DNA binding protein 3	-1.29756	0
ENSG00000170275	CRTAP	cartilage associated protein	-1.53264	0
ENSG00000173210	ABLIM3	actin binding LIM protein family, member 3	-1.00888	1.69e-16
ENSG00000175198	PCCA	propionyl CoA carboxylase, alpha polypeptide	-3.04147	0
ENSG00000175899	A2M	alpha-2-macroglobulin	-2.50627	1.46e-144
ENSG00000176658	MYO1D	myosin ID	-1.07259	9.83e-28
ENSG00000178685	PARP10	poly (ADP-ribose) polymerase family, member 10	-1.66357	6.24e-104
ENSG00000178878	APOLD1	apolipoprotein L domain containing 1	-1.82165	2.76e-258
ENSG00000183615	FAM167B	family with sequence similarity 167, member B	-2.35469	5.72e-39
ENSG00000184381	PLA2G6	phospholipase A2, group VI (cytosolic, calcium-independent)	-1.04693	7.3e-164
ENSG00000185565	LSAMP	limbic system-associated membrane protein	-1.64413	9.64e-123
ENSG00000185621	LMLN	leishmanolysin-like (metallopeptidase M8 family)	-1.56846	4.3e-133
ENSG00000185745	IFIT1	interferon-induced protein with tetratricopeptide repeats 1	-1.62876	5.02e-59
ENSG00000189058	APOD	apolipoprotein D	-5.99472	0
ENSG00000197702	PARVA	parvin, alpha	-1.43374	1.39e-103
ENSG00000198203	SULT1C2	sulfotransferase family, cytosolic, 1C, member 2	-3.96386	0
ENSG00000205336	GPR56	G protein-coupled receptor 56	-2.67119	0
ENSG00000236384	LINC00479	long intergenic non-protein coding RNA 479	-4.92096	0
ENSG00000255346	NOX5	NADPH oxidase, EF-hand calcium binding domain 5	-7.16921	6.16e-289
ENSG00000143416	SELENBP1	selenium binding protein 1	-2.50983	3.88e-69
ENSG00000147852	VLDLR	very low density lipoprotein receptor	-1.07005	5.17e-43
ENSG00000163093	BBS5	Bardet-Biedl syndrome 5	-1.06339	5.51e-140
ENSG00000185201	IFITM2	interferon induced transmembrane protein 2	-1.93706	7.86e-14
ENSG00000103365	GGA2	golgi-associated, gamma adaptin ear containing, ARF binding protein 2	-1.26943	0
ENSG00000185008	ROBO2	roundabout, axon guidance receptor, homolog 2 (Drosophila)	-2.11328	0
ENSG00000164778	EN2	engrailed homeobox 2	-2.56511	0
ENSG00000111229	ARPC3	actin related protein 2/3 complex, subunit 3, 21kDa	-1.11476	2.57e-133
ENSG00000112186	CAP2	CAP, adenylate cyclase-associated protein, 2 (yeast)	-1.66024	0
ENSG00000116106	EPHA4	EPH receptor A4	-1.97762	3.26e-78
ENSG00000125844	RRBP1	ribosome binding protein 1 homolog 180kDa (dog)	-1.24726	5.84e-100
ENSG00000184500	PROS1	protein S (alpha)	-1.69622	1.16e-149
ENSG00000156804	FBXO32	F-box protein 32	-1.75573	5.29e-234
ENSG00000117479	SLC19A2	solute carrier family 19 (thiamine transporter), member 2	-1.16871	4.61e-138
ENSG00000137942	FNBP1L	formin binding protein 1-like	-1.11852	1.82e-76
ENSG00000130429	ARPC1B	actin related protein 2/3 complex, subunit 1B, 41kDa	-1.48553	3.22e-98
ENSG00000105612	DNASE2	deoxyribonuclease II, lysosomal	-1.88856	0
ENSG00000092421	SEMA6A	sema domain, transmembrane domain (TM), and cytoplasmic domain, (semaphorin) 6A	-3.11526	0
ENSG00000135677	GNS	glucosamine (N-acetyl)-6-sulfatase	-1.83745	0
ENSG00000196781	TLE1	transducin-like enhancer of split 1 (E(sp1) homolog, Drosophila)	-1.0387	4.4e-143
ENSG00000234745	HLA-B	major histocompatibility complex, class I, B	-1.18934	6.25e-46
ENSG00000130956	HABP4	hyaluronan binding protein 4	-1.15656	3.03e-118
ENSG00000154917	RAB6B	RAB6B, member RAS oncogene family	-1.31867	1.5e-62
ENSG00000107104	KANK1	KN motif and ankyrin repeat domains 1	-1.46713	1.41e-80
ENSG00000172578	KLHL6	kelch-like 6 (Drosophila)	-2.17845	1.39e-285
ENSG00000065833	ME1	malic enzyme 1, NADP(+)-dependent, cytosolic	-1.28079	9.92e-21
ENSG00000115648	MLPH	melanophilin	-2.15072	2.78e-281
ENSG00000131473	ACLY	ATP citrate lyase	-1.07288	5.85e-246
ENSG00000078295	ADCY2	adenylate cyclase 2 (brain)	-2.23552	6.98e-217
ENSG00000115474	KCNJ13	potassium inwardly-rectifying channel, subfamily J, member 13	-1.97018	1.77e-06
ENSG00000187957	DNER	delta/notch-like EGF repeat containing	-5.09456	0
ENSG00000204186	ZDBF2	zinc finger, DBF-type containing 2	-1.92581	0
ENSG00000197043	ANXA6	annexin A6	-2.34698	0
ENSG00000110693	SOX6	SRY (sex determining region Y)-box 6	-2.10182	1.29e-90
ENSG00000118508	RAB32	RAB32, member RAS oncogene family	-1.96338	2.98e-142
ENSG00000131016	AKAP12	A kinase (PRKA) anchor protein 12	-1.51269	7.48e-98
ENSG00000110080	ST3GAL4	ST3 beta-galactoside alpha-2,3-sialyltransferase 4	-2.45506	0
ENSG00000249115	HAUS5	HAUS augmin-like complex, subunit 5	-1.30826	9.08e-54
ENSG00000131873	CHSY1	chondroitin sulfate synthase 1	-1.70851	0
ENSG00000184588	PDE4B	phosphodiesterase 4B, cAMP-specific	-1.03362	1.61e-94
ENSG00000136888	ATP6V1G1	ATPase, H+ transporting, lysosomal 13kDa, V1 subunit G1	-2.0602	0
ENSG00000166501	PRKCB	protein kinase C, beta	-4.3408	0
ENSG00000101224	CDC25B	cell division cycle 25 homolog B (S. pombe)	-1.75779	9.43e-204
ENSG00000139173	TMEM117	transmembrane protein 117	-1.87369	1.66e-147
ENSG00000110090	CPT1A	carnitine palmitoyltransferase 1A (liver)	-1.01757	1.49e-54
ENSG00000168010	ATG16L2	autophagy related 16-like 2 (S. cerevisiae)	-3.24145	0
ENSG00000006468	ETV1	ets variant 1	-1.73164	6.5e-217
ENSG00000143669	LYST	lysosomal trafficking regulator	-1.5109	3.35e-132
ENSG00000081087	OSTM1	osteopetrosis associated transmembrane protein 1	-2.4212	0
ENSG00000173786	CNP	2',3'-cyclic nucleotide 3' phosphodiesterase	-1.1658	8.91e-190
ENSG00000148429	USP6NL	USP6 N-terminal like	-1.53362	1.38e-61
ENSG00000179388	EGR3	early growth response 3	-1.77809	1.53e-32
ENSG00000197971	MBP	myelin basic protein	-1.91271	5.02e-84
ENSG00000075151	EIF4G3	eukaryotic translation initiation factor 4 gamma, 3	-1.4654	1.67e-201
ENSG00000070731	ST6GALNAC2	ST6 (alpha-N-acetyl-neuraminyl-2,3-beta-galactosyl-1,3)-N-acetylgalactosaminide alpha-2,6-sialyltransferase 2	-2.81558	1.04e-214
ENSG00000189067	LITAF	lipopolysaccharide-induced TNF factor	-1.03226	1.74e-223
ENSG00000140470	ADAMTS17	ADAM metallopeptidase with thrombospondin type 1 motif, 17	-1.13037	2.07e-76
ENSG00000104324	CPQ	carboxypeptidase Q	-3.16827	5.57e-201
ENSG00000140379	BCL2A1	BCL2-related protein A1	-4.10688	0
ENSG00000172340	SUCLG2	succinate-CoA ligase, GDP-forming, beta subunit	-2.595	0
ENSG00000215252	GOLGA8B	golgin A8 family, member B	-1.01807	2.54e-54
ENSG00000120215	MLANA	melan-A	-3.10638	0
ENSG00000139641	ESYT1	extended synaptotagmin-like protein 1	-1.20192	0
ENSG00000128245	YWHAH	tyrosine 3-monooxygenase/tryptophan 5-monooxygenase activation protein, eta polypeptide	-1.66198	0
ENSG00000122966	CIT	citron (rho-interacting, serine/threonine kinase 21)	-1.78553	1.21e-218
ENSG00000204128	C2orf72	chromosome 2 open reading frame 72	-3.20022	0
ENSG00000134222	PSRC1	proline/serine-rich coiled-coil 1	-1.36949	4.57e-210
ENSG00000136868	SLC31A1	solute carrier family 31 (copper transporters), member 1	-1.50343	2.42e-141
ENSG00000162599	NFIA	nuclear factor I/A	-1.18941	3.7e-94
ENSG00000131730	CKMT2	creatine kinase, mitochondrial 2 (sarcomeric)	-1.96567	7.76e-125
ENSG00000101384	JAG1	jagged 1	-1.20301	1.28e-113
ENSG00000135931	ARMC9	armadillo repeat containing 9	-1.52558	4.5e-125
ENSG00000152778	IFIT5	interferon-induced protein with tetratricopeptide repeats 5	-1.20171	2.27e-46
ENSG00000197746	PSAP	prosaposin	-1.17703	1.14e-185
ENSG00000100077	ADRBK2	adrenergic, beta, receptor kinase 2	-4.38116	0
ENSG00000178209	PLEC	plectin	-1.05087	3.72e-295
ENSG00000148180	GSN	gelsolin	-1.82383	0
ENSG00000187164	KIAA1598	KIAA1598	-2.98707	0
ENSG00000148834	GSTO1	glutathione S-transferase omega 1	-1.98621	0
ENSG00000134160	TRPM1	transient receptor potential cation channel, subfamily M, member 1	-3.37371	0
ENSG00000076706	MCAM	melanoma cell adhesion molecule	-2.88844	0
ENSG00000147862	NFIB	nuclear factor I/B	-1.50668	6.61e-78
ENSG00000135900	MRPL44	mitochondrial ribosomal protein L44	-1.22508	1.61e-155
ENSG00000213160	KLHL23	kelch-like 23 (Drosophila)	-1.51199	8.15e-64
ENSG00000141338	ABCA8	ATP-binding cassette, sub-family A (ABC1), member 8	-1.1389	8.02e-23
ENSG00000141376	BCAS3	breast carcinoma amplified sequence 3	-1.69911	9.48e-149
ENSG00000134138	MEIS2	Meis homeobox 2	-2.33193	8.17e-149
ENSG00000153208	MERTK	c-mer proto-oncogene tyrosine kinase	-1.76021	1.1e-136
ENSG00000121152	NCAPH	non-SMC condensin I complex, subunit H	-1.58521	3.73e-132
ENSG00000167889	MGAT5B	mannosyl (alpha-1,6-)-glycoprotein beta-1,6-N-acetyl-glucosaminyltransferase, isozyme B	-3.07633	0
ENSG00000196116	TDRD7	tudor domain containing 7	-2.38287	2.09e-187
ENSG00000038382	TRIO	trio Rho guanine nucleotide exchange factor	-1.11038	6.96e-233
ENSG00000170579	DLGAP1	discs, large (Drosophila) homolog-associated protein 1	-1.5892	5.31e-93
ENSG00000117308	GALE	UDP-galactose-4-epimerase	-1.11423	1.31e-116
ENSG00000114948	ADAM23	ADAM metallopeptidase domain 23	-1.77207	3.13e-131
ENSG00000204103	MAFB	v-maf musculoaponeurotic fibrosarcoma oncogene homolog B (avian)	-1.92729	1.94e-65
ENSG00000169174	PCSK9	proprotein convertase subtilisin/kexin type 9	-3.60333	0
ENSG00000110811	LEPREL2	leprecan-like 2	-1.03478	8.23e-59
ENSG00000183150	GPR19	G protein-coupled receptor 19	-1.15395	1.72e-37
ENSG00000149289	ZC3H12C	zinc finger CCCH-type containing 12C	-1.55775	2.08e-50
ENSG00000169814	BTD	biotinidase	-1.07468	2.23e-41
ENSG00000082196	C1QTNF3	C1q and tumor necrosis factor related protein 3	-1.56361	1.71e-94
ENSG00000157388	CACNA1D	calcium channel, voltage-dependent, L type, alpha 1D subunit	-3.00173	3.15e-47
ENSG00000155252	PI4K2A	phosphatidylinositol 4-kinase type 2 alpha	-1.27777	0
ENSG00000166833	NAV2	neuron navigator 2	-1.45216	4.55e-79
ENSG00000071242	RPS6KA2	ribosomal protein S6 kinase, 90kDa, polypeptide 2	-1.5789	2.9e-66
ENSG00000115339	GALNT3	UDP-N-acetyl-alpha-D-galactosamine:polypeptide N-acetylgalactosaminyltransferase 3 (GalNAc-T3)	-2.2597	1.36e-52
ENSG00000011258	MBTD1	mbt domain containing 1	-1.03163	7.22e-128
ENSG00000127863	TNFRSF19	tumor necrosis factor receptor superfamily, member 19	-3.96351	0
ENSG00000099219	ERMP1	endoplasmic reticulum metallopeptidase 1	-2.49356	3.7e-225
ENSG00000100982	PCIF1	PDX1 C-terminal inhibiting factor 1	-2.46667	2.36e-283
ENSG00000087077	TRIP6	thyroid hormone receptor interactor 6	-1.30729	1.22e-71
ENSG00000198715	C1orf85	chromosome 1 open reading frame 85	-2.46022	0
ENSG00000054690	PLEKHH1	pleckstrin homology domain containing, family H (with MyTH4 domain) member 1	-1.32224	4.54e-59
ENSG00000144218	AFF3	AF4/FMR2 family, member 3	-1.01818	1.34e-23
ENSG00000158022	TRIM63	tripartite motif containing 63, E3 ubiquitin protein ligase	-3.38984	0
ENSG00000166436	TRIM66	tripartite motif containing 66	-1.90864	1.84e-242
ENSG00000157538	DSCR3	Down syndrome critical region gene 3	-1.62223	0
ENSG00000031081	ARHGAP31	Rho GTPase activating protein 31	-2.49462	0
ENSG00000135862	LAMC1	laminin, gamma 1 (formerly LAMB2)	-1.60127	4.55e-175
ENSG00000105613	MAST1	microtubule associated serine/threonine kinase 1	-2.25457	6.12e-223
ENSG00000167011	NAT16	N-acetyltransferase 16 (GCN5-related, putative)	-4.29585	0
ENSG00000086159	AQP6	aquaporin 6, kidney specific	-2.36851	4.94e-170
ENSG00000137441	FGFBP2	fibroblast growth factor binding protein 2	-3.57718	5.06e-163
ENSG00000167123	CERCAM	cerebral endothelial cell adhesion molecule	-1.58806	1.24e-84
ENSG00000185070	FLRT2	fibronectin leucine rich transmembrane protein 2	-1.2777	1.68e-140
ENSG00000170266	GLB1	galactosidase, beta 1	-1.08548	5.59e-196
ENSG00000171621	SPSB1	splA/ryanodine receptor domain and SOCS box containing 1	-1.37443	1.78e-152
ENSG00000187688	TRPV2	transient receptor potential cation channel, subfamily V, member 2	-1.68339	0
ENSG00000103647	CORO2B	coronin, actin binding protein, 2B	-2.11453	2.29e-171
ENSG00000136881	BAAT	bile acid CoA: amino acid N-acyltransferase (glycine N-choloyltransferase)	-1.17308	1.09e-64
ENSG00000184117	NIPSNAP1	nipsnap homolog 1 (C. elegans)	-1.70155	4.47e-205
ENSG00000159348	CYB5R1	cytochrome b5 reductase 1	-1.22329	5.81e-121
ENSG00000061337	LZTS1	leucine zipper, putative tumor suppressor 1	-1.38339	1.54e-64
ENSG00000077498	TYR	tyrosinase (oculocutaneous albinism IA)	-4.05124	0
ENSG00000178814	OPLAH	5-oxoprolinase (ATP-hydrolysing)	-3.25112	0
ENSG00000183876	ARSI	arylsulfatase family, member I	-3.30643	2.5e-11
ENSG00000088543	C3orf18	chromosome 3 open reading frame 18	-1.75861	5.23e-102
ENSG00000072042	RDH11	retinol dehydrogenase 11 (all-trans/9-cis/11-cis)	-1.08813	1.85e-106
ENSG00000145284	SCD5	stearoyl-CoA desaturase 5	-1.63333	3.38e-136
ENSG00000141527	CARD14	caspase recruitment domain family, member 14	-1.73433	8.04e-48
ENSG00000115085	ZAP70	zeta-chain (TCR) associated protein kinase 70kDa	-1.9469	5.1e-119
ENSG00000079616	KIF22	kinesin family member 22	-1.35017	9.35e-96
ENSG00000143952	VPS54	vacuolar protein sorting 54 homolog (S. cerevisiae)	-1.01524	3.9e-103
ENSG00000100033	PRODH	proline dehydrogenase (oxidase) 1	-1.94143	1.84e-234
ENSG00000196549	MME	membrane metallo-endopeptidase	-3.60479	0
ENSG00000168765	GSTM4	glutathione S-transferase mu 4	-2.66638	0
ENSG00000024526	DEPDC1	DEP domain containing 1	-1.83298	0
ENSG00000133121	STARD13	StAR-related lipid transfer (START) domain containing 13	-1.69197	4.28e-284
ENSG00000157657	ZNF618	zinc finger protein 618	-1.1553	5.33e-55
ENSG00000095794	CREM	cAMP responsive element modulator	-1.05799	2.97e-151
ENSG00000073060	SCARB1	scavenger receptor class B, member 1	-1.43504	9.42e-234
ENSG00000133030	MPRIP	myosin phosphatase Rho interacting protein	-1.04022	9.2e-76
ENSG00000188643	S100A16	S100 calcium binding protein A16	-1.33734	2.91e-61
ENSG00000120725	SIL1	SIL1 homolog, endoplasmic reticulum chaperone (S. cerevisiae)	-1.22699	1.29e-109
ENSG00000179218	CALR	calreticulin	-1.15677	2.05e-84
ENSG00000158467	AHCYL2	adenosylhomocysteinase-like 2	-1.36488	1.02e-117
ENSG00000089057	SLC23A2	solute carrier family 23 (nucleobase transporters), member 2	-1.32481	3.62e-83
ENSG00000174021	GNG5	guanine nucleotide binding protein (G protein), gamma 5	-1.48129	2.49e-230
ENSG00000077232	DNAJC10	DnaJ (Hsp40) homolog, subfamily C, member 10	-1.05496	2.34e-100
ENSG00000183621	ZNF438	zinc finger protein 438	-1.2227	3.42e-62
ENSG00000134508	CABLES1	Cdk5 and Abl enzyme substrate 1	-1.40924	1.33e-43
ENSG00000164050	PLXNB1	plexin B1	-1.20172	6.04e-149
ENSG00000187837	HIST1H1C	histone cluster 1, H1c	-2.51803	1.65e-152
ENSG00000178104	PDE4DIP	phosphodiesterase 4D interacting protein	-1.16158	1.3e-72
ENSG00000125827	TMX4	thioredoxin-related transmembrane protein 4	-2.75557	0
ENSG00000135097	MSI1	musashi homolog 1 (Drosophila)	-1.16727	3.54e-117
ENSG00000186642	PDE2A	phosphodiesterase 2A, cGMP-stimulated	-1.66567	7.54e-72
ENSG00000196083	IL1RAP	interleukin 1 receptor accessory protein	-2.38215	0
ENSG00000072041	SLC6A15	solute carrier family 6 (neutral amino acid transporter), member 15	-2.97149	6.52e-240
ENSG00000139974	SLC38A6	solute carrier family 38, member 6	-1.62742	7.58e-133
ENSG00000084754	HADHA	hydroxyacyl-CoA dehydrogenase/3-ketoacyl-CoA thiolase/enoyl-CoA hydratase (trifunctional protein), alpha subunit	-2.04288	2.4e-222
ENSG00000118785	SPP1	secreted phosphoprotein 1	-1.02341	1.12e-78
ENSG00000102048	ASB9	ankyrin repeat and SOCS box containing 9	-1.1987	3.81e-59
ENSG00000173171	MTX1	metaxin 1	-1.44307	6.94e-197
ENSG00000183421	RIPK4	receptor-interacting serine-threonine kinase 4	-2.30726	0
ENSG00000197892	KIF13B	kinesin family member 13B	-1.82596	3.17e-233
ENSG00000187231	SESTD1	SEC14 and spectrin domains 1	-2.48701	6.7e-206
ENSG00000174004	LRRC33	leucine rich repeat containing 33	-1.88602	1.79e-44
ENSG00000117899	MESDC2	mesoderm development candidate 2	-2.36704	0
ENSG00000215262	KCNU1	potassium channel, subfamily U, member 1	-2.58982	1.76e-104
ENSG00000122877	EGR2	early growth response 2	-1.50352	5.63e-41
ENSG00000122642	FKBP9	FK506 binding protein 9, 63 kDa	-1.56709	2.36e-137
ENSG00000134369	NAV1	neuron navigator 1	-2.50346	2.16e-240
ENSG00000091136	LAMB1	laminin, beta 1	-1.2812	7.5e-42
ENSG00000136247	ZDHHC4	zinc finger, DHHC-type containing 4	-1.03422	8.55e-116
ENSG00000153071	DAB2	disabled homolog 2, mitogen-responsive phosphoprotein (Drosophila)	-1.3004	3.64e-156
ENSG00000143801	PSEN2	presenilin 2 (Alzheimer disease 4)	-1.27601	8.98e-135
ENSG00000143341	HMCN1	hemicentin 1	-2.64542	2.86e-94
ENSG00000119729	RHOQ	ras homolog family member Q	-1.20778	1.44e-69
ENSG00000117399	CDC20	cell division cycle 20 homolog (S. cerevisiae)	-1.05913	7.91e-66
ENSG00000134287	ARF3	ADP-ribosylation factor 3	-1.38752	1.75e-187
ENSG00000169129	AFAP1L2	actin filament associated protein 1-like 2	-1.46901	3.44e-11
ENSG00000083067	TRPM3	transient receptor potential cation channel, subfamily M, member 3	-1.68555	2.16e-47
ENSG00000084444	KIAA1467	KIAA1467	-1.17513	5.58e-121
ENSG00000174669	SLC29A2	solute carrier family 29 (nucleoside transporters), member 2	-1.08675	7.36e-19
ENSG00000112290	WASF1	WAS protein family, member 1	-1.99295	2.38e-250
ENSG00000189362	TMEM194B	transmembrane protein 194B	-1.49137	2.92e-122
ENSG00000084731	KIF3C	kinesin family member 3C	-1.01434	6.09e-145
ENSG00000021826	CPS1	carbamoyl-phosphate synthase 1, mitochondrial	-3.15672	3.29e-59
ENSG00000175643	RMI2	RMI2, RecQ mediated genome instability 2, homolog (S. cerevisiae)	-1.13239	3.75e-31
ENSG00000104833	TUBB4A	tubulin, beta 4A class IVa	-1.9247	1.39e-141
ENSG00000181381	DDX60L	DEAD (Asp-Glu-Ala-Asp) box polypeptide 60-like	-1.45564	6.11e-93
ENSG00000068024	HDAC4	histone deacetylase 4	-1.88119	1.96e-109
ENSG00000124181	PLCG1	phospholipase C, gamma 1	-1.67985	0
ENSG00000120278	PLEKHG1	pleckstrin homology domain containing, family G (with RhoGef domain) member 1	-1.34857	2.3e-46
ENSG00000114541	FRMD4B	FERM domain containing 4B	-3.32479	9.83e-288
ENSG00000146676	PURB	purine-rich element binding protein B	-1.42413	1.13e-203
ENSG00000158458	NRG2	neuregulin 2	-1.79486	1.66e-150
ENSG00000088280	ASAP3	ArfGAP with SH3 domain, ankyrin repeat and PH domain 3	-2.00368	9.62e-171
ENSG00000167995	BEST1	bestrophin 1	-3.91461	1.4e-260
ENSG00000105419	MEIS3	Meis homeobox 3	-1.36686	1.9e-26
ENSG00000198691	ABCA4	ATP-binding cassette, sub-family A (ABC1), member 4	-1.99761	6.12e-95
ENSG00000069974	RAB27A	RAB27A, member RAS oncogene family	-2.48934	2.67e-193
ENSG00000158470	B4GALT5	UDP-Gal:betaGlcNAc beta 1,4- galactosyltransferase, polypeptide 5	-1.45883	2.63e-174
ENSG00000131697	NPHP4	nephronophthisis 4	-1.58238	3.34e-154
ENSG00000171310	CHST11	carbohydrate (chondroitin 4) sulfotransferase 11	-1.53271	1.55e-233
ENSG00000149218	ENDOD1	endonuclease domain containing 1	-1.64395	1.06e-158
ENSG00000003989	SLC7A2	solute carrier family 7 (cationic amino acid transporter, y+ system), member 2	-1.70616	1.25e-73
ENSG00000129244	ATP1B2	ATPase, Na+/K+ transporting, beta 2 polypeptide	-2.5739	7.54e-82
ENSG00000092969	TGFB2	transforming growth factor, beta 2	-1.9152	5.38e-86
ENSG00000130813	C19orf66	chromosome 19 open reading frame 66	-1.11187	7.56e-63
ENSG00000167107	ACSF2	acyl-CoA synthetase family member 2	-2.74527	0
ENSG00000129493	HEATR5A	HEAT repeat containing 5A	-1.4246	7.84e-172
ENSG00000167074	TEF	thyrotrophic embryonic factor	-1.96291	6.52e-249
ENSG00000102189	EEA1	early endosome antigen 1	-1.06444	3.78e-39
ENSG00000102054	RBBP7	retinoblastoma binding protein 7	-1.24197	1.56e-164
ENSG00000073849	ST6GAL1	ST6 beta-galactosamide alpha-2,6-sialyltranferase 1	-2.56747	2.05e-98
ENSG00000205269	TMEM170B	transmembrane protein 170B	-1.77394	1.97e-164
ENSG00000170604	IRF2BP1	interferon regulatory factor 2 binding protein 1	-1.73604	2.26e-89
ENSG00000182256	GABRG3	gamma-aminobutyric acid (GABA) A receptor, gamma 3	-1.03961	1.56e-08
ENSG00000137265	IRF4	interferon regulatory factor 4	-3.42725	3.93e-137
ENSG00000101558	VAPA	VAMP (vesicle-associated membrane protein)-associated protein A, 33kDa	-1.65795	0
ENSG00000177807	KCNJ10	potassium inwardly-rectifying channel, subfamily J, member 10	-3.1377	7.6e-164
ENSG00000143776	CDC42BPA	CDC42 binding protein kinase alpha (DMPK-like)	-1.38394	8.26e-89
ENSG00000073921	PICALM	phosphatidylinositol binding clathrin assembly protein	-1.26286	1.42e-246
ENSG00000095383	TBC1D2	TBC1 domain family, member 2	-1.61056	5.81e-166
ENSG00000065320	NTN1	netrin 1	-1.48605	2.78e-88
ENSG00000086232	EIF2AK1	eukaryotic translation initiation factor 2-alpha kinase 1	-1.20653	6.87e-295
ENSG00000138375	SMARCAL1	SWI/SNF related, matrix associated, actin dependent regulator of chromatin, subfamily a-like 1	-1.11506	4.01e-99
ENSG00000198612	COPS8	COP9 constitutive photomorphogenic homolog subunit 8 (Arabidopsis)	-1.82366	0
ENSG00000148700	ADD3	adducin 3 (gamma)	-1.93902	2.62e-81
ENSG00000101190	TCFL5	transcription factor-like 5 (basic helix-loop-helix)	-1.24571	1.39e-47
ENSG00000137575	SDCBP	syndecan binding protein (syntenin)	-2.3402	0
ENSG00000147509	RGS20	regulator of G-protein signaling 20	-1.71827	2.27e-208
ENSG00000168496	FEN1	flap structure-specific endonuclease 1	-1.22236	8.6e-80
ENSG00000124920	C11orf9	chromosome 11 open reading frame 9	-1.66702	1.65e-128
ENSG00000099194	SCD	stearoyl-CoA desaturase (delta-9-desaturase)	-3.77901	0
ENSG00000138346	DNA2	DNA replication helicase 2 homolog (yeast)	-1.02009	1.71e-65
ENSG00000169855	ROBO1	roundabout, axon guidance receptor, homolog 1 (Drosophila)	-1.06837	9.41e-50
ENSG00000243244	STON1	stonin 1	-2.43858	4.4e-207
ENSG00000188313	PLSCR1	phospholipid scramblase 1	-1.33497	5.86e-158
ENSG00000243279	PRAF2	PRA1 domain family, member 2	-1.45608	2.96e-149
ENSG00000111961	SASH1	SAM and SH3 domain containing 1	-1.15137	2.01e-69
ENSG00000125089	SH3TC1	SH3 domain and tetratricopeptide repeats 1	-2.93232	0
ENSG00000179403	VWA1	von Willebrand factor A domain containing 1	-2.32397	5.21e-248
ENSG00000134324	LPIN1	lipin 1	-1.91946	9.01e-305
ENSG00000169908	TM4SF1	transmembrane 4 L six family member 1	-3.29818	2.41e-72
ENSG00000142920	ADC	arginine decarboxylase	-1.00876	2.51e-108
ENSG00000196663	TECPR2	tectonin beta-propeller repeat containing 2	-1.06295	8.13e-76
ENSG00000158669	AGPAT6	1-acylglycerol-3-phosphate O-acyltransferase 6 (lysophosphatidic acid acyltransferase, zeta)	-1.09673	8.05e-151
ENSG00000242110	AMACR	alpha-methylacyl-CoA racemase	-1.01218	1.8e-25
ENSG00000134278	SPIRE1	spire homolog 1 (Drosophila)	-1.31372	2.59e-50
ENSG00000135596	MICAL1	microtubule associated monoxygenase, calponin and LIM domain containing 1	-2.17599	0
ENSG00000105929	ATP6V0A4	ATPase, H+ transporting, lysosomal V0 subunit a4	-2.90744	5.57e-114
ENSG00000085999	RAD54L	RAD54-like (S. cerevisiae)	-1.00485	5.98e-32
ENSG00000115756	HPCAL1	hippocalcin-like 1	-1.68179	6.46e-265
ENSG00000179295	PTPN11	protein tyrosine phosphatase, non-receptor type 11	-1.94102	5.54e-273
ENSG00000160049	DFFA	DNA fragmentation factor, 45kDa, alpha polypeptide	-1.13266	3.12e-194
ENSG00000145217	SLC26A1	solute carrier family 26 (sulfate transporter), member 1	-3.11918	3.77e-192
ENSG00000164733	CTSB	cathepsin B	-1.8464	4.62e-193
ENSG00000116852	KIF21B	kinesin family member 21B	-1.74856	3.37e-66
ENSG00000104812	GYS1	glycogen synthase 1 (muscle)	-1.20551	5.65e-206
ENSG00000166961	MS4A15	membrane-spanning 4-domains, subfamily A, member 15	-1.17478	9.26e-93
ENSG00000087008	ACOX3	acyl-CoA oxidase 3, pristanoyl	-1.13265	2.39e-86
ENSG00000132405	TBC1D14	TBC1 domain family, member 14	-1.57872	0
ENSG00000160194	NDUFV3	NADH dehydrogenase (ubiquinone) flavoprotein 3, 10kDa	-1.21907	8.83e-105
ENSG00000124785	NRN1	neuritin 1	-1.91201	8.3e-288
ENSG00000137501	SYTL2	synaptotagmin-like 2	-1.47702	0
ENSG00000142892	PIGK	phosphatidylinositol glycan anchor biosynthesis, class K	-1.47667	5.57e-162
ENSG00000018510	AGPS	alkylglycerone phosphate synthase	-1.09141	1.15e-65
ENSG00000161542	PRPSAP1	phosphoribosyl pyrophosphate synthetase-associated protein 1	-1.3143	9.05e-255
ENSG00000100504	PYGL	phosphorylase, glycogen, liver	-1.92476	3.09e-285
ENSG00000167535	CACNB3	calcium channel, voltage-dependent, beta 3 subunit	-1.22721	2.67e-77
ENSG00000123983	ACSL3	acyl-CoA synthetase long-chain family member 3	-2.23258	8.31e-186
ENSG00000074416	MGLL	monoglyceride lipase	-1.48337	2.03e-12
ENSG00000185269	NOTUM	notum pectinacetylesterase homolog (Drosophila)	-1.52779	1.86e-45
ENSG00000106771	TMEM245	transmembrane protein 245	-1.50214	1.2e-93
ENSG00000173085	COQ2	coenzyme Q2 homolog, prenyltransferase (yeast)	-1.32275	4.8e-37
ENSG00000091947	TMEM101	transmembrane protein 101	-1.58	1.91e-104
ENSG00000185104	FAF1	Fas (TNFRSF6) associated factor 1	-1.31559	2.69e-177
ENSG00000245526	LINC00461	long intergenic non-protein coding RNA 461	-1.41765	2.83e-63
ENSG00000106780	MEGF9	multiple EGF-like-domains 9	-1.06446	8.67e-113
ENSG00000172197	MBOAT1	membrane bound O-acyltransferase domain containing 1	-1.55056	1.09e-101
ENSG00000108849	PPY	pancreatic polypeptide	-1.33909	4.51e-38
ENSG00000115919	KYNU	kynureninase	-1.36106	0.00447997
ENSG00000079459	FDFT1	farnesyl-diphosphate farnesyltransferase 1	-1.72502	1.03e-158
ENSG00000197415	VEPH1	ventricular zone expressed PH domain homolog 1 (zebrafish)	-2.78845	3.41e-88
ENSG00000100344	PNPLA3	patatin-like phospholipase domain containing 3	-1.97888	2.81e-152
ENSG00000147130	ZMYM3	zinc finger, MYM-type 3	-1.15378	3.75e-148
ENSG00000154080	CHST9	carbohydrate (N-acetylgalactosamine 4-0) sulfotransferase 9	-2.65157	2.18e-234
ENSG00000181856	SLC2A4	solute carrier family 2 (facilitated glucose transporter), member 4	-2.54018	5.31e-63
ENSG00000179029	TMEM107	transmembrane protein 107	-1.21391	3.87e-91
ENSG00000119927	GPAM	glycerol-3-phosphate acyltransferase, mitochondrial	-1.69653	6.08e-99
ENSG00000051341	POLQ	polymerase (DNA directed), theta	-1.56123	6.56e-64
ENSG00000211456	SACM1L	SAC1 suppressor of actin mutations 1-like (yeast)	-1.03978	2.21e-97
ENSG00000158008	EXTL1	exostoses (multiple)-like 1	-2.87151	2.64e-68
ENSG00000104177	MYEF2	myelin expression factor 2	-1.67289	1.56e-78
ENSG00000155970	EFHA2	EF-hand domain family, member A2	-1.30303	3.9e-53
ENSG00000159788	RGS12	regulator of G-protein signaling 12	-1.96379	2.44e-93
ENSG00000187773	FAM69C	family with sequence similarity 69, member C	-3.33198	9.68e-28
ENSG00000125772	GPCPD1	glycerophosphocholine phosphodiesterase GDE1 homolog (S. cerevisiae)	-1.18421	2.77e-35
ENSG00000092529	CAPN3	calpain 3, (p94)	-1.92757	1.56e-81
ENSG00000101440	ASIP	agouti signaling protein	-2.39864	1.96e-66
ENSG00000138101	DTNB	dystrobrevin, beta	-1.54234	9.08e-108
ENSG00000132718	SYT11	synaptotagmin XI	-1.23647	5.16e-193
ENSG00000139505	MTMR6	myotubularin related protein 6	-1.55884	1.34e-165
ENSG00000148730	EIF4EBP2	eukaryotic translation initiation factor 4E binding protein 2	-2.1629	0
ENSG00000234420	ZNF37BP	zinc finger protein 37B, pseudogene	-1.02263	3.56e-75
ENSG00000085063	CD59	CD59 molecule, complement regulatory protein	-2.01536	0
ENSG00000093009	CDC45	cell division cycle 45 homolog (S. cerevisiae)	-1.08304	7.17e-40
ENSG00000102878	HSF4	heat shock transcription factor 4	-2.48798	0
ENSG00000082074	FYB	FYN binding protein	-1.30719	3.57e-08
ENSG00000110880	CORO1C	coronin, actin binding protein, 1C	-1.78475	0
ENSG00000125249	RAP2A	RAP2A, member of RAS oncogene family	-1.02989	1.17e-36
ENSG00000042493	CAPG	capping protein (actin filament), gelsolin-like	-2.60205	9.09e-73
ENSG00000116641	DOCK7	dedicator of cytokinesis 7	-1.47395	8.8e-98
ENSG00000171604	CXXC5	CXXC finger protein 5	-1.78821	5.4e-240
ENSG00000174083	PIK3R6	phosphoinositide-3-kinase, regulatory subunit 6	-2.93923	3.68e-90
ENSG00000161798	AQP5	aquaporin 5	-2.54039	5.83e-54
ENSG00000119333	WDR34	WD repeat domain 34	-1.49737	6.71e-56
ENSG00000108733	PEX12	peroxisomal biogenesis factor 12	-1.78845	2.89e-58
ENSG00000039319	ZFYVE16	zinc finger, FYVE domain containing 16	-3.37402	0
ENSG00000131732	ZCCHC9	zinc finger, CCHC domain containing 9	-1.27651	7.72e-106
ENSG00000093010	COMT	catechol-O-methyltransferase	-1.09972	5.91e-78
ENSG00000165868	HSPA12A	heat shock 70kDa protein 12A	-2.01571	1.17e-153
ENSG00000198873	GRK5	G protein-coupled receptor kinase 5	-1.4126	2.15e-67
ENSG00000148450	MSRB2	methionine sulfoxide reductase B2	-2.4384	0
ENSG00000172456	FGGY	FGGY carbohydrate kinase domain containing	-1.07797	4.65e-17
ENSG00000188157	AGRN	agrin	-1.79275	6.84e-214
ENSG00000137807	KIF23	kinesin family member 23	-1.06258	6.85e-76
ENSG00000197694	SPTAN1	spectrin, alpha, non-erythrocytic 1	-1.25113	2.04e-249
ENSG00000151117	TMEM86A	transmembrane protein 86A	-2.02572	8.88e-150
ENSG00000198089	SFI1	Sfi1 homolog, spindle assembly associated (yeast)	-1.21329	1.43e-80
ENSG00000035687	ADSS	adenylosuccinate synthase	-2.18521	3.74e-185
ENSG00000124019	FAM124B	family with sequence similarity 124B	-1.24167	3.29e-31
ENSG00000075785	RAB7A	RAB7A, member RAS oncogene family	-1.26781	5.88e-263
ENSG00000165424	ZCCHC24	zinc finger, CCHC domain containing 24	-1.90364	1.34e-128
ENSG00000118596	SLC16A7	solute carrier family 16, member 7 (monocarboxylic acid transporter 2)	-1.36633	1.13e-12
ENSG00000177414	UBE2U	ubiquitin-conjugating enzyme E2U (putative)	-2.88238	2.12e-188
ENSG00000156103	MMP16	matrix metallopeptidase 16 (membrane-inserted)	-1.00082	8.58e-20
ENSG00000159214	CCDC24	coiled-coil domain containing 24	-2.47116	9.52e-93
ENSG00000057252	SOAT1	sterol O-acyltransferase 1	-1.35224	5.42e-124
ENSG00000206341	HLA-H	major histocompatibility complex, class I, H (pseudogene)	-1.74856	2.13e-50
ENSG00000114054	PCCB	propionyl CoA carboxylase, beta polypeptide	-1.18665	1.44e-53
ENSG00000072310	SREBF1	sterol regulatory element binding transcription factor 1	-1.91882	0
ENSG00000064393	HIPK2	homeodomain interacting protein kinase 2	-2.12859	5.36e-72
ENSG00000138336	TET1	tet methylcytosine dioxygenase 1	-1.83987	4.59e-114
ENSG00000159674	SPON2	spondin 2, extracellular matrix protein	-2.28419	8.61e-43
ENSG00000136231	IGF2BP3	insulin-like growth factor 2 mRNA binding protein 3	-1.60344	1.6e-149
ENSG00000157483	MYO1E	myosin IE	-1.01087	5.1e-92
ENSG00000135929	CYP27A1	cytochrome P450, family 27, subfamily A, polypeptide 1	-1.57376	9.99e-164
ENSG00000129538	RNASE1	ribonuclease, RNase A family, 1 (pancreatic)	-6.50167	1.03e-99
ENSG00000171467	ZNF318	zinc finger protein 318	-1.66487	0
ENSG00000161653	NAGS	N-acetylglutamate synthase	-3.59483	1.9e-145
ENSG00000151176	PLBD2	phospholipase B domain containing 2	-2.3071	1.61e-192
ENSG00000172292	CERS6	ceramide synthase 6	-1.51302	7.54e-64
ENSG00000174348	PODN	podocan	-3.60201	2.37e-75
ENSG00000160307	S100B	S100 calcium binding protein B	-2.3268	6.62e-125
ENSG00000112679	DUSP22	dual specificity phosphatase 22	-1.32917	1.08e-117
ENSG00000206560	ANKRD28	ankyrin repeat domain 28	-1.68706	0
ENSG00000144455	SUMF1	sulfatase modifying factor 1	-1.95202	3.09e-172
ENSG00000104979	C19orf53	chromosome 19 open reading frame 53	-1.11531	2.79e-76
ENSG00000163689	C3orf67	chromosome 3 open reading frame 67	-1.12912	3.71e-44
ENSG00000089820	ARHGAP4	Rho GTPase activating protein 4	-2.05374	4.56e-75
ENSG00000152223	EPG5	ectopic P-granules autophagy protein 5 homolog (C. elegans)	-1.12302	7.34e-86
ENSG00000198056	PRIM1	primase, DNA, polypeptide 1 (49kDa)	-1.90467	3.15e-107
ENSG00000244476	ERVFRD-1	endogenous retrovirus group FRD, member 1	-2.45	3.16e-70
ENSG00000171241	SHCBP1	SHC SH2-domain binding protein 1	-1.55312	9.84e-276
ENSG00000164985	PSIP1	PC4 and SFRS1 interacting protein 1	-1.33816	4.79e-112
ENSG00000135919	SERPINE2	serpin peptidase inhibitor, clade E (nexin, plasminogen activator inhibitor type 1), member 2	-1.28598	1.16e-138
ENSG00000239474	KBTBD10	kelch repeat and BTB (POZ) domain containing 10	-1.08047	6.79e-09
ENSG00000167550	RHEBL1	Ras homolog enriched in brain like 1	-1.26583	2.03e-35
ENSG00000170915	PAQR8	progestin and adipoQ receptor family member VIII	-2.87922	0
ENSG00000135047	CTSL1	cathepsin L1	-2.81318	0
ENSG00000134376	CRB1	crumbs homolog 1 (Drosophila)	-4.06361	1.89e-127
ENSG00000175471	MCTP1	multiple C2 domains, transmembrane 1	-1.45877	8.41e-104
ENSG00000049323	LTBP1	latent transforming growth factor beta binding protein 1	-1.16554	5.78e-53
ENSG00000115841	FAM82A1	family with sequence similarity 82, member A1	-1.67552	8.96e-144
ENSG00000119684	MLH3	mutL homolog 3 (E. coli)	-2.23327	8.2e-83
ENSG00000122507	BBS9	Bardet-Biedl syndrome 9	-2.45562	3.16e-159
ENSG00000160766	GBAP1	glucosidase, beta, acid pseudogene 1	-2.05075	7.01e-268
ENSG00000115041	KCNIP3	Kv channel interacting protein 3, calsenilin	-1.72894	2.78e-64
ENSG00000112039	FANCE	Fanconi anemia, complementation group E	-1.13225	8.76e-66
ENSG00000151116	UEVLD	UEV and lactate/malate dehyrogenase domains	-1.01971	8.21e-38
ENSG00000020181	GPR124	G protein-coupled receptor 124	-1.54051	1.73e-175
ENSG00000182957	SPATA13	spermatogenesis associated 13	-1.30385	1.32e-76
ENSG00000124299	PEPD	peptidase D	-1.21562	2.74e-67
ENSG00000167315	ACAA2	acetyl-CoA acyltransferase 2	-1.81394	3.43e-106
ENSG00000133619	KRBA1	KRAB-A domain containing 1	-1.11439	1.43e-82
ENSG00000081760	AACS	acetoacetyl-CoA synthetase	-2.37147	0
ENSG00000186301	MST1P2	macrophage stimulating 1 (hepatocyte growth factor-like) pseudogene 2	-2.28652	1.04e-86
ENSG00000204248	COL11A2	collagen, type XI, alpha 2	-1.1079	7.37e-20
ENSG00000128973	CLN6	ceroid-lipofuscinosis, neuronal 6, late infantile, variant	-1.8119	3.68e-117
ENSG00000047249	ATP6V1H	ATPase, H+ transporting, lysosomal 50/57kDa, V1 subunit H	-2.24981	0
ENSG00000118257	NRP2	neuropilin 2	-2.85899	0
ENSG00000163412	EIF4E3	eukaryotic translation initiation factor 4E family member 3	-1.40861	1.81e-11
ENSG00000214575	CPEB1	cytoplasmic polyadenylation element binding protein 1	-1.91482	4.44e-158
ENSG00000169760	NLGN1	neuroligin 1	-2.69215	6.32e-129
ENSG00000138463	DIRC2	disrupted in renal carcinoma 2	-1.42222	6.1e-241
ENSG00000125246	CLYBL	citrate lyase beta like	-1.66939	5.57e-42
ENSG00000135298	BAI3	brain-specific angiogenesis inhibitor 3	-1.3681	1.85e-35
ENSG00000116882	HAO2	hydroxyacid oxidase 2 (long chain)	-2.65479	4.88e-119
ENSG00000131100	ATP6V1E1	ATPase, H+ transporting, lysosomal 31kDa, V1 subunit E1	-1.21124	0
ENSG00000205309	NT5M	5',3'-nucleotidase, mitochondrial	-2.1703	5.14e-70
ENSG00000162607	USP1	ubiquitin specific peptidase 1	-1.77897	7.72e-116
ENSG00000141577	AZI1	5-azacytidine induced 1	-1.48825	1.26e-145
ENSG00000143578	CREB3L4	cAMP responsive element binding protein 3-like 4	-1.15483	9.42e-82
ENSG00000110844	PRPF40B	PRP40 pre-mRNA processing factor 40 homolog B (S. cerevisiae)	-1.40479	7.18e-89
ENSG00000119943	PYROXD2	pyridine nucleotide-disulphide oxidoreductase domain 2	-1.23582	5.99e-90
ENSG00000244038	DDOST	dolichyl-diphosphooligosaccharide--protein glycosyltransferase	-1.37341	0
ENSG00000172638	EFEMP2	EGF containing fibulin-like extracellular matrix protein 2	-3.23411	8.71e-109
ENSG00000163683	C4orf34	chromosome 4 open reading frame 34	-1.78655	1.63e-147
ENSG00000104205	SGK3	serum/glucocorticoid regulated kinase family, member 3	-2.32096	0
ENSG00000156966	B3GNT7	UDP-GlcNAc:betaGal beta-1,3-N-acetylglucosaminyltransferase 7	-1.14035	3.82e-14
ENSG00000135205	CCDC146	coiled-coil domain containing 146	-1.12077	9.54e-52
ENSG00000180035	ZNF48	zinc finger protein 48	-1.70589	3.74e-99
ENSG00000164398	ACSL6	acyl-CoA synthetase long-chain family member 6	-2.65872	1.23e-51
ENSG00000049769	PPP1R3F	protein phosphatase 1, regulatory subunit 3F	-1.98136	7.69e-157
ENSG00000100968	NFATC4	nuclear factor of activated T-cells, cytoplasmic, calcineurin-dependent 4	-1.07566	1.39e-33
ENSG00000110628	SLC22A18	solute carrier family 22, member 18	-3.30377	0
ENSG00000173757	STAT5B	signal transducer and activator of transcription 5B	-1.16028	9.76e-69
ENSG00000133026	MYH10	myosin, heavy chain 10, non-muscle	-1.93299	2.22e-201
ENSG00000164961	KIAA0196	KIAA0196	-1.46934	4.77e-204
ENSG00000151491	EPS8	epidermal growth factor receptor pathway substrate 8	-1.92615	0
ENSG00000170369	CST2	cystatin SA	-3.571	1.79e-58
ENSG00000107263	RAPGEF1	Rap guanine nucleotide exchange factor (GEF) 1	-1.09048	1.72e-53
ENSG00000136573	BLK	B lymphoid tyrosine kinase	-1.26648	4.61e-19
ENSG00000154114	TBCEL	tubulin folding cofactor E-like	-1.20254	4.43e-93
ENSG00000212766	LINC00277	long intergenic non-protein coding RNA 277	-2.69352	1.11e-60
ENSG00000145050	MANF	mesencephalic astrocyte-derived neurotrophic factor	-1.28311	4.31e-111
ENSG00000185650	ZFP36L1	zinc finger protein 36, C3H type-like 1	-1.16248	3.91e-205
ENSG00000102445	KIAA0226L	KIAA0226-like	-1.77831	9.35e-50
ENSG00000137486	ARRB1	arrestin, beta 1	-2.03588	2.37e-197
ENSG00000214826	DDX12P	DEAD/H (Asp-Glu-Ala-Asp/His) box polypeptide 12, pseudogene	-1.04052	1.87e-55
ENSG00000112394	SLC16A10	solute carrier family 16, member 10 (aromatic amino acid transporter)	-2.50737	1.52e-133
ENSG00000135409	AMHR2	anti-Mullerian hormone receptor, type II	-5.30502	1.22e-64
ENSG00000164877	MICALL2	MICAL-like 2	-1.14557	4.93e-22
ENSG00000205777	GAGE1	G antigen 1	-1.63258	4.14e-48
ENSG00000188269	OR7A5	olfactory receptor, family 7, subfamily A, member 5	-1.89041	3.01e-24
ENSG00000198467	TPM2	tropomyosin 2 (beta)	-1.1338	2.05e-22
ENSG00000064042	LIMCH1	LIM and calponin homology domains 1	-2.6723	1.13e-202
ENSG00000137815	RTF1	Rtf1, Paf1/RNA polymerase II complex component, homolog (S. cerevisiae)	-2.05676	0
ENSG00000071553	ATP6AP1	ATPase, H+ transporting, lysosomal accessory protein 1	-2.75595	0
ENSG00000140479	PCSK6	proprotein convertase subtilisin/kexin type 6	-1.12937	1.82e-43
ENSG00000112992	NNT	nicotinamide nucleotide transhydrogenase	-1.96732	3.66e-125
ENSG00000099330	OCEL1	occludin/ELL domain containing 1	-1.48461	2.05e-112
ENSG00000151693	ASAP2	ArfGAP with SH3 domain, ankyrin repeat and PH domain 2	-1.96725	1.38e-183
ENSG00000167363	FN3K	fructosamine 3 kinase	-2.71586	3.26e-288
ENSG00000196911	KPNA5	karyopherin alpha 5 (importin alpha 6)	-1.09963	6.75e-73
ENSG00000169756	LIMS1	LIM and senescent cell antigen-like domains 1	-1.60852	1.03e-135
ENSG00000058056	USP13	ubiquitin specific peptidase 13 (isopeptidase T-3)	-1.52775	5.22e-110
ENSG00000000003	TSPAN6	tetraspanin 6	-2.65968	0
ENSG00000258839	MC1R	melanocortin 1 receptor (alpha melanocyte stimulating hormone receptor)	-1.33442	1.73e-108
ENSG00000141349	G6PC3	glucose 6 phosphatase, catalytic, 3	-1.59014	0
ENSG00000135124	P2RX4	purinergic receptor P2X, ligand-gated ion channel, 4	-1.27298	3.69e-150
ENSG00000105976	MET	met proto-oncogene (hepatocyte growth factor receptor)	-1.88549	1.67e-77
ENSG00000182473	EXOC7	exocyst complex component 7	-1.01702	1.81e-93
ENSG00000169371	SNUPN	snurportin 1	-1.14391	1.47e-19
ENSG00000139168	ZCRB1	zinc finger CCHC-type and RNA binding motif 1	-1.68279	1.05e-173
ENSG00000132613	MTSS1L	metastasis suppressor 1-like	-1.41658	2.9e-223
ENSG00000069493	CLEC2D	C-type lectin domain family 2, member D	-1.98345	1.83e-57
ENSG00000175087	PDIK1L	PDLIM1 interacting kinase 1 like	-1.14918	4.59e-98
ENSG00000124831	LRRFIP1	leucine rich repeat (in FLII) interacting protein 1	-1.13278	2.84e-81
ENSG00000181045	SLC26A11	solute carrier family 26, member 11	-1.41724	1.32e-152
ENSG00000102575	ACP5	acid phosphatase 5, tartrate resistant	-2.82372	0
ENSG00000115652	UXS1	UDP-glucuronate decarboxylase 1	-1.56567	1.36e-215
ENSG00000144035	NAT8	N-acetyltransferase 8 (GCN5-related, putative)	-2.94813	1.87e-45
ENSG00000141933	TPGS1	tubulin polyglutamylase complex subunit 1	-1.32529	1.45e-32
ENSG00000136156	ITM2B	integral membrane protein 2B	-2.18019	0
ENSG00000091844	RGS17	regulator of G-protein signaling 17	-1.25363	4.78e-29
ENSG00000171791	BCL2	B-cell CLL/lymphoma 2	-1.92608	0
ENSG00000155749	ALS2CR12	amyotrophic lateral sclerosis 2 (juvenile) chromosome region, candidate 12	-1.74804	3.05e-54
ENSG00000104953	TLE6	transducin-like enhancer of split 6 (E(sp1) homolog, Drosophila)	-1.16662	2.74e-46
ENSG00000166575	TMEM135	transmembrane protein 135	-1.77938	2.31e-125
ENSG00000164506	STXBP5	syntaxin binding protein 5 (tomosyn)	-1.76519	1.35e-105
ENSG00000041515	MYO16	myosin XVI	-2.29828	1.37e-144
ENSG00000103479	RBL2	retinoblastoma-like 2 (p130)	-1.02639	2.32e-30
ENSG00000172500	FIBP	fibroblast growth factor (acidic) intracellular binding protein	-1.19433	2.64e-33
ENSG00000129534	MIS18BP1	MIS18 binding protein 1	-1.32301	1.97e-132
ENSG00000164434	FABP7	fatty acid binding protein 7, brain	-1.21345	2.44e-11
ENSG00000119630	PGF	placental growth factor	-3.13983	9.81e-109
ENSG00000134215	VAV3	vav 3 guanine nucleotide exchange factor	-1.2449	9.39e-07
ENSG00000175029	CTBP2	C-terminal binding protein 2	-1.55408	2.63e-292
ENSG00000116991	SIPA1L2	signal-induced proliferation-associated 1 like 2	-1.16853	5.13e-73
ENSG00000109339	MAPK10	mitogen-activated protein kinase 10	-3.90893	6.88e-48
ENSG00000010318	PHF7	PHD finger protein 7	-1.50728	2.89e-86
ENSG00000254389	RHPN1-AS1	RHPN1 antisense RNA 1	-1.22517	1.73e-20
ENSG00000178175	ZNF366	zinc finger protein 366	-1.67128	2.51e-17
ENSG00000198870	C9orf96	chromosome 9 open reading frame 96	-1.24749	3.34e-51
ENSG00000187091	PLCD1	phospholipase C, delta 1	-1.27401	4.26e-39
ENSG00000017373	SRCIN1	SRC kinase signaling inhibitor 1	-2.0074	1.12e-55
ENSG00000198363	ASPH	aspartate beta-hydroxylase	-1.15468	3.42e-133
ENSG00000152380	FAM151B	family with sequence similarity 151, member B	-3.5972	2.87e-66
ENSG00000167580	AQP2	aquaporin 2 (collecting duct)	-3.74262	6.8e-56
ENSG00000111911	HINT3	histidine triad nucleotide binding protein 3	-2.05829	9.53e-94
ENSG00000179930	ZNF648	zinc finger protein 648	-1.22421	2.46e-07
ENSG00000140015	KCNH5	potassium voltage-gated channel, subfamily H (eag-related), member 5	-2.55312	9.6e-44
ENSG00000130177	CDC16	cell division cycle 16 homolog (S. cerevisiae)	-1.24232	3.44e-212
ENSG00000132313	MRPL35	mitochondrial ribosomal protein L35	-1.66755	4.77e-165
ENSG00000060656	PTPRU	protein tyrosine phosphatase, receptor type, U	-1.84202	2.81e-88
ENSG00000141179	PCTP	phosphatidylcholine transfer protein	-1.86582	4.17e-209
ENSG00000166794	PPIB	peptidylprolyl isomerase B (cyclophilin B)	-1.29375	9.03e-152
ENSG00000163527	STT3B	STT3, subunit of the oligosaccharyltransferase complex, homolog B (S. cerevisiae)	-1.48518	1.01e-231
ENSG00000131747	TOP2A	topoisomerase (DNA) II alpha 170kDa	-1.7795	8.58e-122
ENSG00000146409	SLC18B1	solute carrier family 18, subfamily B, member 1	-1.15381	3.4e-140
ENSG00000102924	CBLN1	cerebellin 1 precursor	-1.78709	2.48e-20
ENSG00000170348	TMED10	transmembrane emp24-like trafficking protein 10 (yeast)	-2.1947	0
ENSG00000187642	C1orf170	chromosome 1 open reading frame 170	-2.98683	1.53e-38
ENSG00000113140	SPARC	secreted protein, acidic, cysteine-rich (osteonectin)	-1.37816	2.53e-104
ENSG00000134755	DSC2	desmocollin 2	-1.28991	1.54e-28
ENSG00000158887	MPZ	myelin protein zero	-1.65609	5.5e-49
ENSG00000197102	DYNC1H1	dynein, cytoplasmic 1, heavy chain 1	-1.67228	1.13e-141
ENSG00000198162	MAN1A2	mannosidase, alpha, class 1A, member 2	-2.27527	0
ENSG00000135424	ITGA7	integrin, alpha 7	-4.38768	0
ENSG00000173918	C1QTNF1	C1q and tumor necrosis factor related protein 1	-1.05216	9.93e-09
ENSG00000126561	STAT5A	signal transducer and activator of transcription 5A	-1.22863	2.87e-66
ENSG00000127530	OR7C1	olfactory receptor, family 7, subfamily C, member 1	-3.81892	8.57e-50
ENSG00000169018	FEM1B	fem-1 homolog b (C. elegans)	-1.58	7.46e-124
ENSG00000112139	MDGA1	MAM domain containing glycosylphosphatidylinositol anchor 1	-2.7938	2.35e-172
ENSG00000157456	CCNB2	cyclin B2	-1.48107	1.31e-234
ENSG00000188677	PARVB	parvin, beta	-2.59952	0
ENSG00000176890	TYMS	thymidylate synthetase	-1.60542	4.34e-68
ENSG00000130775	THEMIS2	thymocyte selection associated family member 2	-3.29065	6.26e-126
ENSG00000140451	PIF1	PIF1 5'-to-3' DNA helicase homolog (S. cerevisiae)	-1.69557	7.58e-72
ENSG00000123095	BHLHE41	basic helix-loop-helix family, member e41	-3.05689	1.08e-208
ENSG00000142731	PLK4	polo-like kinase 4	-1.46964	7.8e-135
ENSG00000134852	CLOCK	clock homolog (mouse)	-1.38569	1.02e-112
ENSG00000139679	LPAR6	lysophosphatidic acid receptor 6	-1.36328	4.01e-45
ENSG00000157193	LRP8	low density lipoprotein receptor-related protein 8, apolipoprotein e receptor	-2.66166	0
ENSG00000136040	PLXNC1	plexin C1	-3.52382	0
ENSG00000185760	KCNQ5	potassium voltage-gated channel, KQT-like subfamily, member 5	-2.42036	0
ENSG00000139971	C14orf37	chromosome 14 open reading frame 37	-3.14721	8.82e-198
ENSG00000102910	LONP2	lon peptidase 2, peroxisomal	-1.45549	1.62e-67
ENSG00000178950	GAK	cyclin G associated kinase	-1.26328	1.23e-67
ENSG00000137103	TMEM8B	transmembrane protein 8B	-1.29416	3.22e-53
ENSG00000135587	SMPD2	sphingomyelin phosphodiesterase 2, neutral membrane (neutral sphingomyelinase)	-1.36748	6.16e-52
ENSG00000151240	DIP2C	DIP2 disco-interacting protein 2 homolog C (Drosophila)	-2.40047	0
ENSG00000135299	ANKRD6	ankyrin repeat domain 6	-1.16617	2.61e-76
ENSG00000178722	C5orf64	chromosome 5 open reading frame 64	-3.14994	2.18e-36
ENSG00000187098	MITF	microphthalmia-associated transcription factor	-1.57108	7.22e-60
ENSG00000134954	ETS1	v-ets erythroblastosis virus E26 oncogene homolog 1 (avian)	-1.1335	1.42e-105
ENSG00000142233	NTN5	netrin 5	-1.0171	3.14e-13
ENSG00000130475	FCHO1	FCH domain only 1	-1.39841	2.19e-27
ENSG00000137558	PI15	peptidase inhibitor 15	-1.18399	1.13e-18
ENSG00000118298	CA14	carbonic anhydrase XIV	-1.6748	1.65e-72
ENSG00000161835	GRASP	GRP1 (general receptor for phosphoinositides 1)-associated scaffold protein	-1.4526	1.89e-77
ENSG00000138801	PAPSS1	3'-phosphoadenosine 5'-phosphosulfate synthase 1	-1.53259	6.72e-202
ENSG00000121621	KIF18A	kinesin family member 18A	-1.11839	5.66e-86
ENSG00000111674	ENO2	enolase 2 (gamma, neuronal)	-1.74832	1.87e-256
ENSG00000142192	APP	amyloid beta (A4) precursor protein	-1.61089	7.16e-196
ENSG00000069424	KCNAB2	potassium voltage-gated channel, shaker-related subfamily, beta member 2	-3.65481	0
ENSG00000141556	TBCD	tubulin folding cofactor D	-2.11071	0
ENSG00000183508	FAM46C	family with sequence similarity 46, member C	-1.61033	5.23e-85
ENSG00000170832	USP32	ubiquitin specific peptidase 32	-1.64859	1.57e-143
ENSG00000218510	LINC00339	long intergenic non-protein coding RNA 339	-1.66465	6.79e-62
ENSG00000156381	ANKRD9	ankyrin repeat domain 9	-2.02571	2.55e-200
ENSG00000198053	SIRPA	signal-regulatory protein alpha	-1.06036	3.42e-60
ENSG00000130528	HRC	histidine rich calcium binding protein	-3.93223	8.74e-31
ENSG00000197150	ABCB8	ATP-binding cassette, sub-family B (MDR/TAP), member 8	-1.14064	3.67e-68
ENSG00000204632	HLA-G	major histocompatibility complex, class I, G	-2.33321	1.26e-264
ENSG00000124839	RAB17	RAB17, member RAS oncogene family	-1.61191	1.93e-168
ENSG00000115317	HTRA2	HtrA serine peptidase 2	-1.26105	2.43e-104
ENSG00000248746	ACTN3	actinin, alpha 3	-1.44223	1.35e-15
ENSG00000145882	PCYOX1L	prenylcysteine oxidase 1 like	-2.09672	1.68e-166
ENSG00000023902	PLEKHO1	pleckstrin homology domain containing, family O member 1	-1.63453	2.43e-104
ENSG00000152240	HAUS1	HAUS augmin-like complex, subunit 1	-1.45192	9.58e-40
ENSG00000264063	MIR3687	microRNA 3687	-1.02348	7.16e-06
ENSG00000124818	OPN5	opsin 5	-3.19585	3.73e-32
ENSG00000100714	MTHFD1	methylenetetrahydrofolate dehydrogenase (NADP+ dependent) 1, methenyltetrahydrofolate cyclohydrolase, formyltetrahydrofolate synthetase	-1.16503	4.36e-44
ENSG00000069702	TGFBR3	transforming growth factor, beta receptor III	-2.0157	2.78e-126
ENSG00000182504	CEP97	centrosomal protein 97kDa	-1.05572	1.2e-66
ENSG00000119227	PIGZ	phosphatidylinositol glycan anchor biosynthesis, class Z	-3.4643	6.49e-179
ENSG00000079246	XRCC5	X-ray repair complementing defective repair in Chinese hamster cells 5 (double-strand-break rejoining)	-1.02846	7.23e-100
ENSG00000007968	E2F2	E2F transcription factor 2	-1.12945	2.35e-29
ENSG00000197006	METTL9	methyltransferase like 9	-1.43763	8.71e-109
ENSG00000188649	CC2D2B	coiled-coil and C2 domain containing 2B	-3.63559	1.06e-33
ENSG00000104763	ASAH1	N-acylsphingosine amidohydrolase (acid ceramidase) 1	-2.23929	0
ENSG00000214140	PRCD	progressive rod-cone degeneration	-2.03883	1.46e-84
ENSG00000155903	RASA2	RAS p21 protein activator 2	-1.36527	2.54e-221
ENSG00000118193	KIF14	kinesin family member 14	-2.03534	0
ENSG00000175283	DOLK	dolichol kinase	-1.37574	1.36e-205
ENSG00000064886	CHI3L2	chitinase 3-like 2	-2.04594	7.71e-25
ENSG00000189171	S100A13	S100 calcium binding protein A13	-1.38232	5.47e-70
ENSG00000117859	OSBPL9	oxysterol binding protein-like 9	-1.38768	1.65e-143
ENSG00000137449	CPEB2	cytoplasmic polyadenylation element binding protein 2	-1.38172	2.99e-147
ENSG00000164330	EBF1	early B-cell factor 1	-1.90795	1.54e-21
ENSG00000056998	GYG2	glycogenin 2	-2.09291	1.55e-235
ENSG00000173950	XXYLT1	xyloside xylosyltransferase 1	-1.20953	1.05e-133
ENSG00000168078	PBK	PDZ binding kinase	-1.91489	0
ENSG00000172531	PPP1CA	protein phosphatase 1, catalytic subunit, alpha isozyme	-1.26738	7.13e-128
ENSG00000109610	SOD3	superoxide dismutase 3, extracellular	-3.78325	1.79e-34
ENSG00000065243	PKN2	protein kinase N2	-1.13897	5.48e-83
ENSG00000153774	CFDP1	craniofacial development protein 1	-1.07421	1.75e-165
ENSG00000068784	SRBD1	S1 RNA binding domain 1	-1.26921	6.46e-86
ENSG00000138413	IDH1	isocitrate dehydrogenase 1 (NADP+), soluble	-1.53928	2.11e-102
ENSG00000007237	GAS7	growth arrest-specific 7	-2.87787	0
ENSG00000051382	PIK3CB	phosphatidylinositol-4,5-bisphosphate 3-kinase, catalytic subunit beta	-2.08483	7.48e-182
ENSG00000143398	PIP5K1A	phosphatidylinositol-4-phosphate 5-kinase, type I, alpha	-1.0911	0
ENSG00000260456	C16orf95	Uncharacterized protein C16orf95	-2.18761	1.5e-30
ENSG00000196482	ESRRG	estrogen-related receptor gamma	-1.43649	3.97e-21
ENSG00000101265	RASSF2	Ras association (RalGDS/AF-6) domain family member 2	-1.9866	1.23e-185
ENSG00000142875	PRKACB	protein kinase, cAMP-dependent, catalytic, beta	-1.85591	2.08e-172
ENSG00000168827	GFM1	G elongation factor, mitochondrial 1	-1.72459	1.19e-240
ENSG00000090565	RAB11FIP3	RAB11 family interacting protein 3 (class II)	-1.03927	4.26e-108
ENSG00000127483	HP1BP3	heterochromatin protein 1, binding protein 3	-1.53346	0
ENSG00000196666	FAM180B	family with sequence similarity 180, member B	-1.85779	9.79e-32
ENSG00000111886	GABRR2	gamma-aminobutyric acid (GABA) A receptor, rho 2	-1.00692	6.17e-05
ENSG00000162434	JAK1	Janus kinase 1	-1.44704	0
ENSG00000176533	GNG7	guanine nucleotide binding protein (G protein), gamma 7	-1.32202	1.52e-75
ENSG00000196396	PTPN1	protein tyrosine phosphatase, non-receptor type 1	-2.14664	0
ENSG00000241697	TMEFF1	transmembrane protein with EGF-like and two follistatin-like domains 1	-3.07635	1.32e-47
ENSG00000232119	MCTS1	malignant T cell amplified sequence 1	-1.05134	2.91e-22
ENSG00000074696	PTPLAD1	protein tyrosine phosphatase-like A domain containing 1	-1.01878	3.07e-54
ENSG00000134982	APC	adenomatous polyposis coli	-1.42499	1.2e-119
ENSG00000117650	NEK2	NIMA (never in mitosis gene a)-related kinase 2	-1.2626	5.07e-153
ENSG00000063015	SEZ6	seizure related 6 homolog (mouse)	-1.56271	3.62e-15
ENSG00000164989	CCDC171	coiled-coil domain containing 171	-2.425	4.8e-102
ENSG00000185129	PURA	purine-rich element binding protein A	-1.02109	1.7e-112
ENSG00000136943	CTSL2	cathepsin L2	-1.14244	2.29e-56
ENSG00000065060	UHRF1BP1	UHRF1 binding protein 1	-1.28243	2.39e-40
ENSG00000123106	CCDC91	coiled-coil domain containing 91	-1.82934	6.84e-85
ENSG00000177054	ZDHHC13	zinc finger, DHHC-type containing 13	-1.82171	1.31e-158
ENSG00000174080	CTSF	cathepsin F	-3.30021	0
ENSG00000102904	TSNAXIP1	translin-associated factor X interacting protein 1	-1.50668	4.59e-36
ENSG00000163939	PBRM1	polybromo 1	-2.36646	6.31e-268
ENSG00000146122	DAAM2	dishevelled associated activator of morphogenesis 2	-1.37657	4.14e-156
ENSG00000013523	ANGEL1	angel homolog 1 (Drosophila)	-1.14833	2.84e-197
ENSG00000145386	CCNA2	cyclin A2	-1.08591	1.93e-55
ENSG00000062038	CDH3	cadherin 3, type 1, P-cadherin (placental)	-1.80668	3.92e-124
ENSG00000152402	GUCY1A2	guanylate cyclase 1, soluble, alpha 2	-1.92554	2.88e-47
ENSG00000117090	SLAMF1	signaling lymphocytic activation molecule family member 1	-4.06229	1.56e-31
ENSG00000132429	POPDC3	popeye domain containing 3	-1.05206	1.16e-34
ENSG00000145348	TBCK	TBC1 domain containing kinase	-1.17838	8.13e-110
ENSG00000006715	VPS41	vacuolar protein sorting 41 homolog (S. cerevisiae)	-1.19784	3.78e-182
ENSG00000138160	KIF11	kinesin family member 11	-1.59127	1.61e-87
ENSG00000173486	FKBP2	FK506 binding protein 2, 13kDa	-1.34741	5.46e-126
ENSG00000143369	ECM1	extracellular matrix protein 1	-3.87382	0
ENSG00000196776	CD47	CD47 molecule	-1.09519	8.94e-69
ENSG00000123201	GUCY1B2	guanylate cyclase 1, soluble, beta 2 (pseudogene)	-1.82608	1.89e-17
ENSG00000078804	TP53INP2	tumor protein p53 inducible nuclear protein 2	-1.8228	1.75e-298
ENSG00000038002	AGA	aspartylglucosaminidase	-2.05766	3.7e-152
ENSG00000226869	LHFPL3-AS1	LHFPL3 antisense RNA 1	-3.3357	1.86e-148
ENSG00000105639	JAK3	Janus kinase 3	-1.78451	2.8e-25
ENSG00000063601	MTMR1	myotubularin related protein 1	-1.01027	5.53e-40
ENSG00000107864	CPEB3	cytoplasmic polyadenylation element binding protein 3	-1.07238	1.76e-28
ENSG00000116586	LAMTOR2	late endosomal/lysosomal adaptor, MAPK and MTOR activator 2	-1.09798	8.77e-46
ENSG00000101350	KIF3B	kinesin family member 3B	-1.39742	2.05e-292
ENSG00000169856	ONECUT1	one cut homeobox 1	-1.11513	1.33e-12
ENSG00000086504	MRPL28	mitochondrial ribosomal protein L28	-1.53631	8.16e-180
ENSG00000023516	AKAP11	A kinase (PRKA) anchor protein 11	-1.57161	2.92e-143
ENSG00000151287	TEX30	testis expressed 30	-1.06894	3.35e-133
ENSG00000103507	BCKDK	branched chain ketoacid dehydrogenase kinase	-1.13466	2.08e-112
ENSG00000116199	FAM20B	family with sequence similarity 20, member B	-1.37268	1.26e-103
ENSG00000108784	NAGLU	N-acetylglucosaminidase, alpha	-2.35187	6.9e-290
ENSG00000172270	BSG	basigin (Ok blood group)	-1.08464	6.25e-89
ENSG00000167112	TRUB2	TruB pseudouridine (psi) synthase homolog 2 (E. coli)	-1.13855	2.77e-97
ENSG00000112033	PPARD	peroxisome proliferator-activated receptor delta	-1.14865	3.19e-99
ENSG00000160050	CCDC28B	coiled-coil domain containing 28B	-1.12785	1.32e-50
ENSG00000171885	AQP4	aquaporin 4	-3.22697	5.15e-29
ENSG00000105220	GPI	glucose-6-phosphate isomerase	-1.1735	1.66e-147
ENSG00000136982	DSCC1	defective in sister chromatid cohesion 1 homolog (S. cerevisiae)	-1.54775	6.78e-49
ENSG00000171357	LURAP1	leucine rich adaptor protein 1	-1.85794	9.8e-60
ENSG00000087076	HSD17B14	hydroxysteroid (17-beta) dehydrogenase 14	-1.68161	3.51e-159
ENSG00000170276	HSPB2	Heat shock protein beta-2	-2.93025	6.08e-05
ENSG00000149311	ATM	ataxia telangiectasia mutated	-1.33938	9.68e-44
ENSG00000245694	CRNDE	colorectal neoplasia differentially expressed (non-protein coding)	-1.00066	6.07e-19
ENSG00000171368	TPPP	tubulin polymerization promoting protein	-2.07822	0
ENSG00000151233	GXYLT1	glucoside xylosyltransferase 1	-1.36705	1.44e-120
ENSG00000184831	APOO	apolipoprotein O	-1.44889	2.43e-111
ENSG00000105875	WDR91	WD repeat domain 91	-2.11213	0
ENSG00000006576	PHTF2	putative homeodomain transcription factor 2	-1.13545	1.26e-72
ENSG00000183337	BCOR	BCL6 corepressor	-2.91506	7.3e-220
ENSG00000095370	SH2D3C	SH2 domain containing 3C	-3.15379	8.87e-28
ENSG00000185640	KRT79	keratin 79	-5.00131	4.8e-35
ENSG00000197959	DNM3	dynamin 3	-1.1825	7.23e-45
ENSG00000247556	OIP5-AS1	OIP5 antisense RNA 1	-1.64259	9.89e-149
ENSG00000100146	SOX10	SRY (sex determining region Y)-box 10	-2.4635	0
ENSG00000174456	C12orf76	chromosome 12 open reading frame 76	-1.11483	1.49e-57
ENSG00000136275	C7orf69	chromosome 7 open reading frame 69	-1.46477	2.17e-10
ENSG00000121879	PIK3CA	phosphatidylinositol-4,5-bisphosphate 3-kinase, catalytic subunit alpha	-1.31932	3.33e-207
ENSG00000171450	CDK5R2	cyclin-dependent kinase 5, regulatory subunit 2 (p39)	-2.36667	2.18e-19
ENSG00000072163	LIMS2	LIM and senescent cell antigen-like domains 2	-1.9374	5.06e-13
ENSG00000136738	STAM	signal transducing adaptor molecule (SH3 domain and ITAM motif) 1	-2.27756	0
ENSG00000196782	MAML3	mastermind-like 3 (Drosophila)	-1.07282	5.63e-34
ENSG00000146828	SLC12A9	solute carrier family 12 (potassium/chloride transporters), member 9	-1.29557	6.76e-110
ENSG00000125124	BBS2	Bardet-Biedl syndrome 2	-1.00882	8.57e-33
ENSG00000176402	GJC3	gap junction protein, gamma 3, 30.2kDa	-2.22783	7.72e-15
ENSG00000065054	SLC9A3R2	solute carrier family 9, subfamily A (NHE3, cation proton antiporter 3), member 3 regulator 2	-1.08304	4.41e-25
ENSG00000146729	GBAS	glioblastoma amplified sequence	-1.99531	0
ENSG00000099797	TECR	trans-2,3-enoyl-CoA reductase	-2.09359	2.14e-301
ENSG00000153283	CD96	CD96 molecule	-1.37189	5.26e-05
ENSG00000147526	TACC1	transforming, acidic coiled-coil containing protein 1	-2.40498	0
ENSG00000145354	CISD2	CDGSH iron sulfur domain 2	-1.46886	7.7e-102
ENSG00000164849	GPR146	G protein-coupled receptor 146	-1.15134	3.06e-16
ENSG00000103540	CCP110	centriolar coiled coil protein 110kDa	-1.36803	6.29e-62
ENSG00000105643	ARRDC2	arrestin domain containing 2	-2.01996	7.29e-260
ENSG00000167371	PRRT2	proline-rich transmembrane protein 2	-2.01885	6.27e-20
ENSG00000214253	FIS1	fission 1 (mitochondrial outer membrane) homolog (S. cerevisiae)	-1.09554	2.1e-115
ENSG00000125434	SLC25A35	solute carrier family 25, member 35	-2.22411	3.63e-106
ENSG00000090686	USP48	ubiquitin specific peptidase 48	-1.33918	7.98e-260
ENSG00000162729	IGSF8	immunoglobulin superfamily, member 8	-2.7983	0
ENSG00000131374	TBC1D5	TBC1 domain family, member 5	-1.14049	2.73e-37
ENSG00000052126	PLEKHA5	pleckstrin homology domain containing, family A member 5	-1.94147	0
ENSG00000065717	TLE2	transducin-like enhancer of split 2 (E(sp1) homolog, Drosophila)	-3.30048	1.72e-68
ENSG00000198755	RPL10A	ribosomal protein L10a	-1.54084	9.55e-133
ENSG00000127481	UBR4	ubiquitin protein ligase E3 component n-recognin 4	-1.1495	1.73e-72
ENSG00000160695	VPS11	vacuolar protein sorting 11 homolog (S. cerevisiae)	-1.15697	2.24e-111
ENSG00000165672	PRDX3	peroxiredoxin 3	-1.20475	2.65e-122
ENSG00000185522	C11orf35	chromosome 11 open reading frame 35	-1.72558	1.43e-61
ENSG00000160219	GAB3	GRB2-associated binding protein 3	-1.73048	1.68e-10
ENSG00000130270	ATP8B3	ATPase, aminophospholipid transporter, class I, type 8B, member 3	-2.02131	3.89e-26
ENSG00000111642	CHD4	chromodomain helicase DNA binding protein 4	-1.51343	0
ENSG00000184925	LCN12	lipocalin 12	-2.21455	5.14e-17
ENSG00000151725	MLF1IP	MLF1 interacting protein	-1.637	5.61e-98
ENSG00000163884	KLF15	Kruppel-like factor 15	-1.65761	5.64e-73
ENSG00000196535	MYO18A	myosin XVIIIA	-1.16518	4.05e-111
ENSG00000186583	SPATC1	spermatogenesis and centriole associated 1	-1.40756	4.3e-07
ENSG00000164403	SHROOM1	shroom family member 1	-1.02396	2.41e-12
ENSG00000082805	ERC1	ELKS/RAB6-interacting/CAST family member 1	-1.17049	5.54e-34
ENSG00000090534	THPO	thrombopoietin	-1.73183	9.84e-10
ENSG00000182612	TSPAN10	tetraspanin 10	-3.25897	0
ENSG00000008382	MPND	MPN domain containing	-1.1076	1.98e-16
ENSG00000134955	SLC37A2	solute carrier family 37 (glycerol-3-phosphate transporter), member 2	-1.90612	7.71e-98
ENSG00000008513	ST3GAL1	ST3 beta-galactoside alpha-2,3-sialyltransferase 1	-2.34968	7.19e-250
ENSG00000173281	PPP1R3B	protein phosphatase 1, regulatory subunit 3B	-1.55094	1.08e-115
ENSG00000110237	ARHGEF17	Rho guanine nucleotide exchange factor (GEF) 17	-1.63337	1.31e-82
ENSG00000183172	C22orf32	chromosome 22 open reading frame 32	-1.03074	8.07e-22
ENSG00000174156	GSTA3	glutathione S-transferase alpha 3	-2.31711	1.46e-12
ENSG00000170264	FAM161A	family with sequence similarity 161, member A	-1.34646	7.22e-37
ENSG00000107581	EIF3A	eukaryotic translation initiation factor 3, subunit A	-1.44645	0
ENSG00000162522	KIAA1522	KIAA1522	-1.28534	2.89e-213
ENSG00000179588	ZFPM1	zinc finger protein, multitype 1	-1.223	1.27e-21
ENSG00000126895	AVPR2	arginine vasopressin receptor 2	-1.74548	7.28e-06
ENSG00000061938	TNK2	tyrosine kinase, non-receptor, 2	-1.01801	4.14e-54
ENSG00000136161	RCBTB2	regulator of chromosome condensation (RCC1) and BTB (POZ) domain containing protein 2	-1.56609	1.7e-113
ENSG00000134057	CCNB1	cyclin B1	-1.98296	0
ENSG00000146433	TMEM181	transmembrane protein 181	-1.30279	1.14e-258
ENSG00000067064	IDI1	isopentenyl-diphosphate delta isomerase 1	-1.40856	1.56e-103
ENSG00000108175	ZMIZ1	zinc finger, MIZ-type containing 1	-1.70624	0
ENSG00000188662	HILS1	histone linker H1 domain, spermatid-specific 1, pseudogene	-1.74745	2.32e-24
ENSG00000136854	STXBP1	syntaxin binding protein 1	-2.34176	0
ENSG00000122970	IFT81	intraflagellar transport 81 homolog (Chlamydomonas)	-1.88996	9.53e-279
ENSG00000115325	DOK1	docking protein 1, 62kDa (downstream of tyrosine kinase 1)	-1.08464	7.41e-06
ENSG00000198900	TOP1	topoisomerase (DNA) I	-1.19965	0
ENSG00000241839	PLEKHO2	pleckstrin homology domain containing, family O member 2	-1.54358	0
ENSG00000117305	HMGCL	3-hydroxymethyl-3-methylglutaryl-CoA lyase	-1.24838	2.3e-123
ENSG00000228544	KIAA1984-AS1	KIAA1984 antisense RNA 1	-1.82075	9.1e-46
ENSG00000149503	INCENP	inner centromere protein antigens 135/155kDa	-1.40017	2.57e-190
ENSG00000182718	ANXA2	annexin A2	-1.5725	7.16e-263
ENSG00000005249	PRKAR2B	protein kinase, cAMP-dependent, regulatory, type II, beta	-1.18385	3.89e-53
ENSG00000129990	SYT5	synaptotagmin V	-1.83259	1.83e-24
ENSG00000186834	HEXIM1	hexamethylene bis-acetamide inducible 1	-1.96371	6.11e-134
ENSG00000141562	NARF	nuclear prelamin A recognition factor	-1.13552	1.19e-154
ENSG00000111670	GNPTAB	N-acetylglucosamine-1-phosphate transferase, alpha and beta subunits	-1.45452	9.95e-107
ENSG00000068831	RASGRP2	RAS guanyl releasing protein 2 (calcium and DAG-regulated)	-2.52459	6.7e-14
ENSG00000134243	SORT1	sortilin 1	-1.0902	1.29e-71
ENSG00000046653	GPM6B	glycoprotein M6B	-2.71344	5.52e-210
ENSG00000133943	C14orf159	chromosome 14 open reading frame 159	-1.28841	1.16e-101
ENSG00000150867	PIP4K2A	phosphatidylinositol-5-phosphate 4-kinase, type II, alpha	-1.21167	1.63e-46
ENSG00000118217	ATF6	activating transcription factor 6	-1.07912	1.22e-62
ENSG00000154654	NCAM2	neural cell adhesion molecule 2	-2.39851	1.66e-202
ENSG00000089876	DHX32	DEAH (Asp-Glu-Ala-His) box polypeptide 32	-1.05388	1.34e-77
ENSG00000014641	MDH1	malate dehydrogenase 1, NAD (soluble)	-1.90382	0
ENSG00000090581	GNPTG	N-acetylglucosamine-1-phosphate transferase, gamma subunit	-1.47448	5.74e-134
ENSG00000135968	GCC2	GRIP and coiled-coil domain containing 2	-1.25847	8.45e-238
ENSG00000121691	CAT	catalase	-1.12046	7.7e-88
ENSG00000114902	SPCS1	signal peptidase complex subunit 1 homolog (S. cerevisiae)	-1.52248	2.73e-267
ENSG00000095059	DHPS	deoxyhypusine synthase	-1.04083	4.69e-111
ENSG00000203859	HSD3B2	hydroxy-delta-5-steroid dehydrogenase, 3 beta- and steroid delta-isomerase 2	-2.08768	3.34e-10
ENSG00000164904	ALDH7A1	aldehyde dehydrogenase 7 family, member A1	-1.67022	2.46e-174
ENSG00000162688	AGL	amylo-alpha-1, 6-glucosidase, 4-alpha-glucanotransferase	-1.1754	1.34e-57
ENSG00000135828	RNASEL	ribonuclease L (2',5'-oligoisoadenylate synthetase-dependent)	-1.05829	4.75e-41
ENSG00000127241	MASP1	mannan-binding lectin serine peptidase 1 (C4/C2 activating component of Ra-reactive factor)	-1.36888	5.71e-07
ENSG00000154511	FAM69A	family with sequence similarity 69, member A	-4.76104	0
ENSG00000177875	C12orf68	chromosome 12 open reading frame 68	-1.30706	0.014687
ENSG00000106443	PHF14	PHD finger protein 14	-1.05123	1.32e-192
ENSG00000143641	GALNT2	UDP-N-acetyl-alpha-D-galactosamine:polypeptide N-acetylgalactosaminyltransferase 2 (GalNAc-T2)	-1.94954	0
ENSG00000139737	SLAIN1	SLAIN motif family, member 1	-2.30785	9.33e-144
ENSG00000117724	CENPF	centromere protein F, 350/400kDa (mitosin)	-3.02133	0
ENSG00000144485	HES6	hairy and enhancer of split 6 (Drosophila)	-1.31949	5.77e-43
ENSG00000168615	ADAM9	ADAM metallopeptidase domain 9	-1.40823	8.91e-114
ENSG00000115073	ACTR1B	ARP1 actin-related protein 1 homolog B, centractin beta (yeast)	-1.32775	5.52e-131
ENSG00000169738	DCXR	dicarbonyl/L-xylulose reductase	-1.70614	3.16e-132
ENSG00000187676	B3GALTL	beta 1,3-galactosyltransferase-like	-2.07907	2.21e-179
ENSG00000197557	TTC30A	tetratricopeptide repeat domain 30A	-1.45211	1.6e-40
ENSG00000115504	EHBP1	EH domain binding protein 1	-1.4677	1.55e-193
ENSG00000128951	DUT	deoxyuridine triphosphatase	-1.68403	1.54e-151
ENSG00000015285	WAS	Wiskott-Aldrich syndrome	-2.10478	2.79e-14
ENSG00000137070	IL11RA	interleukin 11 receptor, alpha	-1.77634	3.47e-168
ENSG00000149743	TRPT1	tRNA phosphotransferase 1	-1.14696	2.72e-73
ENSG00000198231	DDX42	DEAD (Asp-Glu-Ala-Asp) box polypeptide 42	-1.00375	8.08e-283
ENSG00000101160	CTSZ	cathepsin Z	-1.07253	1.27e-68
ENSG00000163626	COX18	COX18 cytochrome c oxidase assembly homolog (S. cerevisiae)	-1.10938	1.09e-19
ENSG00000070526	ST6GALNAC1	ST6 (alpha-N-acetyl-neuraminyl-2,3-beta-galactosyl-1,3)-N-acetylgalactosaminide alpha-2,6-sialyltransferase 1	-3.2516	1.45e-16
ENSG00000079739	PGM1	phosphoglucomutase 1	-2.09294	1.97e-159
ENSG00000115355	CCDC88A	coiled-coil domain containing 88A	-1.54352	1.99e-106
ENSG00000138316	ADAMTS14	ADAM metallopeptidase with thrombospondin type 1 motif, 14	-4.74328	1.95e-18
ENSG00000162636	FAM102B	family with sequence similarity 102, member B	-1.63769	1.09e-100
ENSG00000138600	SPPL2A	signal peptide peptidase like 2A	-1.27495	1.38e-123
ENSG00000116525	TRIM62	tripartite motif containing 62	-2.1956	3.04e-169
ENSG00000125445	MRPS7	mitochondrial ribosomal protein S7	-1.28037	2.09e-225
ENSG00000184207	PGP	phosphoglycolate phosphatase	-1.22986	6.62e-51
ENSG00000204217	BMPR2	bone morphogenetic protein receptor, type II (serine/threonine kinase)	-1.04322	2.13e-47
ENSG00000148362	C9orf142	chromosome 9 open reading frame 142	-1.08113	1.7e-11
ENSG00000057935	MTA3	metastasis associated 1 family, member 3	-1.09893	9.28e-210
ENSG00000171680	PLEKHG5	pleckstrin homology domain containing, family G (with RhoGef domain) member 5	-1.70936	2.45e-64
ENSG00000100979	PLTP	phospholipid transfer protein	-1.92472	4.71e-287
ENSG00000204052	LRRC73	leucine rich repeat containing 73	-2.31126	4.01e-20
ENSG00000213079	SCAF8	SR-related CTD-associated factor 8	-1.22576	2.67e-116
ENSG00000110011	DNAJC4	DnaJ (Hsp40) homolog, subfamily C, member 4	-1.04899	8.6e-109
ENSG00000196659	TTC30B	tetratricopeptide repeat domain 30B	-2.6654	2.6e-75
ENSG00000188763	FZD9	frizzled family receptor 9	-2.30327	2.19e-19
ENSG00000136381	IREB2	iron-responsive element binding protein 2	-1.28204	4.18e-202
ENSG00000126261	UBA2	ubiquitin-like modifier activating enzyme 2	-1.07109	1.22e-73
ENSG00000071575	TRIB2	tribbles homolog 2 (Drosophila)	-1.7169	1.22e-102
ENSG00000144118	RALB	v-ral simian leukemia viral oncogene homolog B (ras related; GTP binding protein)	-2.63284	0
ENSG00000128694	OSGEPL1	O-sialoglycoprotein endopeptidase-like 1	-1.15051	9.42e-51
ENSG00000124440	HIF3A	hypoxia inducible factor 3, alpha subunit	-2.09143	3.33e-07
ENSG00000100036	SLC35E4	solute carrier family 35, member E4	-1.07724	7.2e-61
ENSG00000184232	OAF	OAF homolog (Drosophila)	-2.31948	5.98e-276
ENSG00000139921	TMX1	thioredoxin-related transmembrane protein 1	-1.22733	4.43e-156
ENSG00000156831	NSMCE2	non-SMC element 2, MMS21 homolog (S. cerevisiae)	-1.01189	3.35e-66
ENSG00000140299	BNIP2	BCL2/adenovirus E1B 19kDa interacting protein 2	-1.08575	2.41e-79
ENSG00000091513	TF	transferrin	-1.19911	1.34e-06
ENSG00000203855	HSD3BP4	hydroxy-delta-5-steroid dehydrogenase, 3 beta, pseudogene 4	-1.27542	0.00202192
ENSG00000129003	VPS13C	vacuolar protein sorting 13 homolog C (S. cerevisiae)	-1.2086	3.44e-34
ENSG00000187624	C17orf97	chromosome 17 open reading frame 97	-1.37178	2.28e-14
ENSG00000116815	CD58	CD58 molecule	-1.19886	1.52e-87
ENSG00000162073	PAQR4	progestin and adipoQ receptor family member IV	-2.28542	5.1e-58
ENSG00000039650	PNKP	polynucleotide kinase 3'-phosphatase	-1.49462	2.07e-216
ENSG00000074964	ARHGEF10L	Rho guanine nucleotide exchange factor (GEF) 10-like	-1.1915	2.04e-34
ENSG00000227702	LINC00111	long intergenic non-protein coding RNA 111	-2.65467	1.91e-09
ENSG00000140740	UQCRC2	ubiquinol-cytochrome c reductase core protein II	-1.07418	7.64e-67
ENSG00000173811	CCDC13-AS1	CCDC13 antisense RNA 1	-1.12258	0.0020142
ENSG00000157881	PANK4	pantothenate kinase 4	-1.01305	5.15e-83
ENSG00000092445	TYRO3	TYRO3 protein tyrosine kinase	-1.0388	2.56e-55
ENSG00000024048	UBR2	ubiquitin protein ligase E3 component n-recognin 2	-1.1035	1.25e-202
ENSG00000165475	CRYL1	crystallin, lambda 1	-1.93922	8.89e-91
ENSG00000197969	VPS13A	vacuolar protein sorting 13 homolog A (S. cerevisiae)	-1.05857	4.28e-58
ENSG00000105429	MEGF8	multiple EGF-like-domains 8	-2.04396	4.35e-139
ENSG00000088827	SIGLEC1	sialic acid binding Ig-like lectin 1, sialoadhesin	-1.73571	0.000394283
ENSG00000082293	COL19A1	collagen, type XIX, alpha 1	-1.211	1.45e-18
ENSG00000100503	NIN	ninein (GSK3B interacting protein)	-2.24275	1.7e-180
ENSG00000137274	BPHL	biphenyl hydrolase-like (serine hydrolase)	-1.33439	3.78e-69
ENSG00000133816	MICAL2	microtubule associated monoxygenase, calponin and LIM domain containing 2	-1.44648	1.16e-39
ENSG00000110076	NRXN2	neurexin 2	-3.02402	6.19e-13
ENSG00000198331	HYLS1	hydrolethalus syndrome 1	-1.29734	1.23e-28
ENSG00000186230	ZNF749	zinc finger protein 749	-1.1949	5.62e-24
ENSG00000113597	C5orf44	chromosome 5 open reading frame 44	-1.71353	8.54e-198
ENSG00000171823	FBXL14	F-box and leucine-rich repeat protein 14	-1.10907	6.82e-61
ENSG00000184221	OLIG1	oligodendrocyte transcription factor 1	-1.54109	0.000174975
ENSG00000184428	TOP1MT	topoisomerase (DNA) I, mitochondrial	-1.32045	1.54e-79
ENSG00000128266	GNAZ	guanine nucleotide binding protein (G protein), alpha z polypeptide	-3.35092	6.99e-86
ENSG00000141447	OSBPL1A	oxysterol binding protein-like 1A	-1.07952	3.32e-27
ENSG00000163539	CLASP2	cytoplasmic linker associated protein 2	-1.36911	2.09e-91
ENSG00000105516	DBP	D site of albumin promoter (albumin D-box) binding protein	-2.16435	6.87e-58
ENSG00000162511	LAPTM5	lysosomal protein transmembrane 5	-2.07312	4.83e-07
ENSG00000104765	BNIP3L	BCL2/adenovirus E1B 19kDa interacting protein 3-like	-1.55965	9.12e-240
ENSG00000082213	C5orf22	chromosome 5 open reading frame 22	-1.58362	1.76e-137
ENSG00000160097	FNDC5	fibronectin type III domain containing 5	-1.86075	1.96e-07
ENSG00000147649	MTDH	metadherin	-2.44489	0
ENSG00000058272	PPP1R12A	protein phosphatase 1, regulatory subunit 12A	-1.10446	3.69e-157
ENSG00000173088	C10orf131	chromosome 10 open reading frame 131	-2.15939	4.93e-15
ENSG00000080839	RBL1	retinoblastoma-like 1 (p107)	-1.08043	1.13e-29
ENSG00000068137	PLEKHH3	pleckstrin homology domain containing, family H (with MyTH4 domain) member 3	-1.24427	1.04e-92
ENSG00000141232	TOB1	transducer of ERBB2, 1	-1.56455	0
ENSG00000176225	RTTN	rotatin	-1.78444	2.56e-69
ENSG00000167700	MFSD3	major facilitator superfamily domain containing 3	-1.52639	8.89e-74
ENSG00000156973	PDE6D	phosphodiesterase 6D, cGMP-specific, rod, delta	-1.21099	2.02e-58
ENSG00000113161	HMGCR	3-hydroxy-3-methylglutaryl-CoA reductase	-1.69886	1.24e-233
ENSG00000121964	GTDC1	glycosyltransferase-like domain containing 1	-1.51811	2.54e-106
ENSG00000096060	FKBP5	FK506 binding protein 5	-1.4423	1.96e-60
ENSG00000090661	CERS4	ceramide synthase 4	-1.71316	1.22e-80
ENSG00000004660	CAMKK1	calcium/calmodulin-dependent protein kinase kinase 1, alpha	-1.90691	5.58e-56
ENSG00000135472	FAIM2	Fas apoptotic inhibitory molecule 2	-2.67241	3.34e-06
ENSG00000105483	CARD8	caspase recruitment domain family, member 8	-1.05032	1.11e-60
ENSG00000137404	NRM	nurim (nuclear envelope membrane protein)	-1.78969	1.61e-66
ENSG00000169895	SYAP1	synapse associated protein 1	-1.48928	0
ENSG00000113492	AGXT2	alanine--glyoxylate aminotransferase 2	-2.25583	6.38e-06
ENSG00000133069	TMCC2	transmembrane and coiled-coil domain family 2	-1.68537	9.14e-187
ENSG00000197312	DDI2	DNA-damage inducible 1 homolog 2 (S. cerevisiae)	-1.21357	3.99e-280
ENSG00000176909	MAMSTR	MEF2 activating motif and SAP domain containing transcriptional regulator	-1.20011	1.97e-08
ENSG00000167261	DPEP2	dipeptidase 2	-3.13874	5.44e-10
ENSG00000126787	DLGAP5	discs, large (Drosophila) homolog-associated protein 5	-1.58798	7.9e-134
ENSG00000134827	TCN1	transcobalamin I (vitamin B12 binding protein, R binder family)	-2.71617	1.2e-34
ENSG00000117906	RCN2	reticulocalbin 2, EF-hand calcium binding domain	-1.65102	2.02e-214
ENSG00000152952	PLOD2	procollagen-lysine, 2-oxoglutarate 5-dioxygenase 2	-1.38111	3.04e-128
ENSG00000135338	LCA5	Leber congenital amaurosis 5	-1.68464	2.93e-124
ENSG00000032742	IFT88	intraflagellar transport 88 homolog (Chlamydomonas)	-1.38061	1.48e-88
ENSG00000117118	SDHB	succinate dehydrogenase complex, subunit B, iron sulfur (Ip)	-1.50408	1.02e-162
ENSG00000177464	GPR4	G protein-coupled receptor 4	-1.58861	1.64e-08
ENSG00000237330	RNF223	ring finger protein 223	-1.28945	0.0187138
ENSG00000221986	MYBPHL	myosin binding protein H-like	-1.31187	1.71e-05
ENSG00000214193	SH3D21	SH3 domain containing 21	-1.15244	1.6e-33
ENSG00000062725	APPBP2	amyloid beta precursor protein (cytoplasmic tail) binding protein 2	-1.17271	1.65e-80
ENSG00000124104	SNX21	sorting nexin family member 21	-1.36055	4.85e-116
ENSG00000085511	MAP3K4	mitogen-activated protein kinase kinase kinase 4	-1.38863	1.23e-65
ENSG00000141295	SCRN2	secernin 2	-1.45601	1.76e-88
ENSG00000185737	NRG3	neuregulin 3	-1.86811	8.93e-103
ENSG00000137872	SEMA6D	sema domain, transmembrane domain (TM), and cytoplasmic domain, (semaphorin) 6D	-1.79488	1.21e-85
ENSG00000165895	ARHGAP42	Rho GTPase activating protein 42	-1.74286	7.67e-139
ENSG00000143633	C1orf131	chromosome 1 open reading frame 131	-1.60165	9.74e-107
ENSG00000006282	SPATA20	spermatogenesis associated 20	-2.27707	0
ENSG00000128965	CHAC1	ChaC, cation transport regulator homolog 1 (E. coli)	-1.68248	1.55e-12
ENSG00000006283	CACNA1G	calcium channel, voltage-dependent, T type, alpha 1G subunit	-1.14839	0.00740559
ENSG00000159398	CES5A	carboxylesterase 5A	-2.18439	0.000240594
ENSG00000143870	PDIA6	protein disulfide isomerase family A, member 6	-2.22408	0
ENSG00000088854	C20orf194	chromosome 20 open reading frame 194	-1.25621	6.3e-148
ENSG00000028137	TNFRSF1B	tumor necrosis factor receptor superfamily, member 1B	-2.0764	1.52e-08
ENSG00000148082	SHC3	SHC (Src homology 2 domain containing) transforming protein 3	-2.12478	8.82e-08
ENSG00000174807	CD248	CD248 molecule, endosialin	-2.42095	0.000104595
ENSG00000114737	CISH	cytokine inducible SH2-containing protein	-2.475	4.01e-61
ENSG00000115053	NCL	nucleolin	-1.8824	1.15e-244
ENSG00000077097	TOP2B	topoisomerase (DNA) II beta 180kDa	-1.73317	5.92e-239
ENSG00000105675	ATP4A	ATPase, H+/K+ exchanging, alpha polypeptide	-1.68816	8.59e-05
ENSG00000197948	FCHSD1	FCH and double SH3 domains 1	-1.02034	1.78e-64
ENSG00000100316	RPL3	ribosomal protein L3	-1.91665	2.02e-157
ENSG00000231793	DOC2GP	double C2-like domains, gamma, pseudogene	-1.81194	1.32e-06
ENSG00000157693	C9orf91	chromosome 9 open reading frame 91	-1.46039	4.9e-57
ENSG00000100299	ARSA	arylsulfatase A	-2.10911	4.84e-125
ENSG00000163703	CRELD1	cysteine-rich with EGF-like domains 1	-1.75119	1.93e-267
ENSG00000169139	UBE2V2	ubiquitin-conjugating enzyme E2 variant 2	-1.4275	1.31e-207
ENSG00000171132	PRKCE	protein kinase C, epsilon	-1.45778	4.81e-105
ENSG00000143226	FCGR2A	Fc fragment of IgG, low affinity IIa, receptor (CD32)	-2.45417	3.86e-35
ENSG00000119401	TRIM32	tripartite motif containing 32	-1.44485	0
ENSG00000184005	ST6GALNAC3	ST6 (alpha-N-acetyl-neuraminyl-2,3-beta-galactosyl-1,3)-N-acetylgalactosaminide alpha-2,6-sialyltransferase 3	-4.11957	0
ENSG00000143702	CEP170	centrosomal protein 170kDa	-2.55183	0
ENSG00000122176	FMOD	fibromodulin	-1.97711	0.000454554
ENSG00000085365	SCAMP1	secretory carrier membrane protein 1	-1.68589	2.11e-221
ENSG00000103528	SYT17	synaptotagmin XVII	-1.65501	1.08e-08
ENSG00000044459	CNTLN	centlein, centrosomal protein	-1.75661	6.52e-97
ENSG00000198736	MSRB1	methionine sulfoxide reductase B1	-1.34922	9.54e-47
ENSG00000181513	ACBD4	acyl-CoA binding domain containing 4	-1.1778	9.57e-48
ENSG00000155115	GTF3C6	general transcription factor IIIC, polypeptide 6, alpha 35kDa	-1.23622	5.12e-69
ENSG00000173641	HSPB7	heat shock 27kDa protein family, member 7 (cardiovascular)	-1.99757	7.37e-13
ENSG00000240764	PCDHGC5	protocadherin gamma subfamily C, 5	-1.57305	3.37e-05
ENSG00000088367	EPB41L1	erythrocyte membrane protein band 4.1-like 1	-2.62443	0
ENSG00000134308	YWHAQ	tyrosine 3-monooxygenase/tryptophan 5-monooxygenase activation protein, theta polypeptide	-1.58009	0
ENSG00000227906	SNAP25-AS1	SNAP25 antisense RNA 1	-1.88733	9.61e-06
ENSG00000160349	LCN1	lipocalin 1	-2.52322	6.61e-05
ENSG00000076555	ACACB	acetyl-CoA carboxylase beta	-1.76307	7.81e-301
ENSG00000131626	PPFIA1	protein tyrosine phosphatase, receptor type, f polypeptide (PTPRF), interacting protein (liprin), alpha 1	-1.51794	0
ENSG00000155368	DBI	diazepam binding inhibitor (GABA receptor modulator, acyl-CoA binding protein)	-1.04763	3.11e-114
ENSG00000157510	AFAP1L1	actin filament associated protein 1-like 1	-1.73843	1.94e-265
ENSG00000127418	FGFRL1	fibroblast growth factor receptor-like 1	-1.50819	3.4e-64
ENSG00000137812	CASC5	cancer susceptibility candidate 5	-1.33396	1.04e-49
ENSG00000129450	SIGLEC9	sialic acid binding Ig-like lectin 9	-1.64163	0.0234599
ENSG00000170315	UBB	ubiquitin B	-1.11839	3.32e-197
ENSG00000164675	IQUB	IQ motif and ubiquitin domain containing	-1.58845	1.01e-08
ENSG00000143627	PKLR	pyruvate kinase, liver and RBC	-3.12488	9.5e-43
ENSG00000004864	SLC25A13	solute carrier family 25 (aspartate/glutamate carrier), member 13	-1.31447	4.34e-66
ENSG00000143515	ATP8B2	ATPase, aminophospholipid transporter, class I, type 8B, member 2	-1.28303	0
ENSG00000163755	HPS3	Hermansky-Pudlak syndrome 3	-1.32051	6.37e-59
ENSG00000135114	OASL	2'-5'-oligoadenylate synthetase-like	-4.00387	2.73e-24
ENSG00000141560	FN3KRP	fructosamine 3 kinase related protein	-1.12289	3.3e-115
ENSG00000146005	PSD2	pleckstrin and Sec7 domain containing 2	-1.28586	0.00935774
ENSG00000164930	FZD6	frizzled family receptor 6	-1.61624	7.78e-136
ENSG00000066279	ASPM	asp (abnormal spindle) homolog, microcephaly associated (Drosophila)	-2.44973	2.64e-178
ENSG00000157873	TNFRSF14	tumor necrosis factor receptor superfamily, member 14	-2.36445	0
ENSG00000078070	MCCC1	methylcrotonoyl-CoA carboxylase 1 (alpha)	-1.05719	1.38e-87
ENSG00000165879	FRAT1	frequently rearranged in advanced T-cell lymphomas	-2.16722	6.85e-84
ENSG00000137145	DENND4C	DENN/MADD domain containing 4C	-1.17413	3.4e-90
ENSG00000164323	KIAA1430	KIAA1430	-1.35297	6.38e-52
ENSG00000163565	IFI16	interferon, gamma-inducible protein 16	-2.29017	0
ENSG00000163254	CRYGC	crystallin, gamma C	-2.73671	6.47e-05
ENSG00000149548	CCDC15	coiled-coil domain containing 15	-1.50927	3.28e-30
ENSG00000152061	RABGAP1L	RAB GTPase activating protein 1-like	-1.04806	8.07e-57
ENSG00000185168	LINC00482	long intergenic non-protein coding RNA 482	-1.46502	3.24e-05
ENSG00000169564	PCBP1	poly(rC) binding protein 1	-1.01056	3.32e-127
ENSG00000127884	ECHS1	enoyl CoA hydratase, short chain, 1, mitochondrial	-1.05731	1.19e-76
ENSG00000101290	CDS2	CDP-diacylglycerol synthase (phosphatidate cytidylyltransferase) 2	-1.34892	5.87e-261
ENSG00000175946	KLHL38	kelch-like 38 (Drosophila)	-1.42614	3e-47
ENSG00000103489	XYLT1	xylosyltransferase I	-1.5749	3.04e-75
ENSG00000105953	OGDH	oxoglutarate (alpha-ketoglutarate) dehydrogenase (lipoamide)	-2.64213	7.86e-261
ENSG00000138439	FAM117B	family with sequence similarity 117, member B	-2.15776	2.22e-60
ENSG00000242616	GNG10	guanine nucleotide binding protein (G protein), gamma 10	-1.9742	2.71e-43
ENSG00000122550	KLHL7	kelch-like 7 (Drosophila)	-1.3691	2.55e-197
ENSG00000253309	SERPINE3	serpin peptidase inhibitor, clade E (nexin, plasminogen activator inhibitor type 1), member 3	-1.20569	6.75e-17
ENSG00000164949	GEM	GTP binding protein overexpressed in skeletal muscle	-1.42518	9.93e-28
ENSG00000113269	RNF130	ring finger protein 130	-1.25272	7.06e-157
ENSG00000125910	S1PR4	sphingosine-1-phosphate receptor 4	-1.2545	0.0474653
ENSG00000110536	PTPMT1	protein tyrosine phosphatase, mitochondrial 1	-1.30542	3.65e-50
ENSG00000258429	PDF	peptide deformylase (mitochondrial)	-1.2913	8.54e-58
ENSG00000168259	DNAJC7	DnaJ (Hsp40) homolog, subfamily C, member 7	-1.5312	1.79e-167
ENSG00000160953	MUM1	melanoma associated antigen (mutated) 1	-1.09419	1.01e-278
ENSG00000140057	AK7	adenylate kinase 7	-1.99715	3.25e-49
ENSG00000167077	MEI1	meiosis inhibitor 1	-1.2329	7.95e-08
ENSG00000166387	PPFIBP2	PTPRF interacting protein, binding protein 2 (liprin beta 2)	-1.00599	1.51e-39
ENSG00000215440	NPEPL1	aminopeptidase-like 1	-2.38616	5.33e-146
ENSG00000198753	PLXNB3	plexin B3	-3.22931	1.55e-266
ENSG00000137513	NARS2	asparaginyl-tRNA synthetase 2, mitochondrial (putative)	-1.46323	3.59e-54
ENSG00000157985	AGAP1	ArfGAP with GTPase domain, ankyrin repeat and PH domain 1	-1.37171	8.21e-85
ENSG00000149428	HYOU1	hypoxia up-regulated 1	-1.38263	6.38e-66
ENSG00000100191	SLC5A4	solute carrier family 5 (low affinity glucose cotransporter), member 4	-2.6295	3.15e-18
ENSG00000152292	SH2D6	SH2 domain containing 6	-1.05924	0.000583051
ENSG00000063854	HAGH	hydroxyacylglutathione hydrolase	-1.96643	7.15e-172
ENSG00000158714	SLAMF8	SLAM family member 8	-1.63258	2.12e-06
ENSG00000150967	ABCB9	ATP-binding cassette, sub-family B (MDR/TAP), member 9	-1.39201	1.76e-34
ENSG00000163399	ATP1A1	ATPase, Na+/K+ transporting, alpha 1 polypeptide	-1.58177	5.19e-168
ENSG00000154258	ABCA9	ATP-binding cassette, sub-family A (ABC1), member 9	-1.61664	7.61e-11
ENSG00000124688	MAD2L1BP	MAD2L1 binding protein	-1.15641	1.61e-74
ENSG00000168484	SFTPC	surfactant protein C	-2.07154	2.24e-05
ENSG00000163975	MFI2	antigen p97 (melanoma associated) identified by monoclonal antibodies 133.2 and 96.5	-1.95961	0
ENSG00000124140	SLC12A5	solute carrier family 12 (potassium/chloride transporter), member 5	-3.21441	7.76e-08
ENSG00000095739	BAMBI	BMP and activin membrane-bound inhibitor homolog (Xenopus laevis)	-1.05154	3.21e-123
ENSG00000160360	GPSM1	G-protein signaling modulator 1	-1.75576	5.12e-247
ENSG00000163219	ARHGAP25	Rho GTPase activating protein 25	-3.47733	1.24e-16
ENSG00000177363	LRRN4CL	LRRN4 C-terminal like	-2.41047	5.96e-31
ENSG00000128641	MYO1B	myosin IB	-1.82215	0
ENSG00000169641	LUZP1	leucine zipper protein 1	-1.02566	9.2e-143
ENSG00000092201	SUPT16H	suppressor of Ty 16 homolog (S. cerevisiae)	-1.73933	0
ENSG00000161249	DMKN	dermokine	-2.54276	1.53e-20
ENSG00000149609	C20orf144	chromosome 20 open reading frame 144	-1.30005	0.00260945
ENSG00000180644	PRF1	perforin 1 (pore forming protein)	-1.83071	0.0117312
ENSG00000107745	MICU1	mitochondrial calcium uptake 1	-1.92239	0
ENSG00000102882	MAPK3	mitogen-activated protein kinase 3	-1.52001	6.08e-184
ENSG00000158352	SHROOM4	shroom family member 4	-1.33345	1.72e-87
ENSG00000137776	SLTM	SAFB-like, transcription modulator	-1.04301	1.08e-100
ENSG00000112339	HBS1L	HBS1-like (S. cerevisiae)	-1.80122	0
ENSG00000171951	SCG2	secretogranin II	-1.11125	4.07e-09
ENSG00000136861	CDK5RAP2	CDK5 regulatory subunit associated protein 2	-1.63408	4.44e-297
ENSG00000185442	FAM174B	family with sequence similarity 174, member B	-1.73619	6.86e-49
ENSG00000174371	EXO1	exonuclease 1	-1.64404	3.03e-49
ENSG00000105486	LIG1	ligase I, DNA, ATP-dependent	-1.50485	3.27e-75
ENSG00000065457	ADAT1	adenosine deaminase, tRNA-specific 1	-1.18549	2.51e-28
ENSG00000068796	KIF2A	kinesin heavy chain member 2A	-1.71428	7.96e-123
ENSG00000185813	PCYT2	phosphate cytidylyltransferase 2, ethanolamine	-1.81172	1.96e-284
ENSG00000110013	SIAE	sialic acid acetylesterase	-1.92217	0
ENSG00000065413	ANKRD44	ankyrin repeat domain 44	-1.55012	1.1e-59
ENSG00000079950	STX7	syntaxin 7	-1.52183	6.63e-85
ENSG00000158290	CUL4B	cullin 4B	-1.91236	0
ENSG00000009413	REV3L	REV3-like, polymerase (DNA directed), zeta, catalytic subunit	-1.85788	1.1e-215
ENSG00000245573	BDNF-AS	BDNF antisense RNA	-1.10259	7.25e-10
ENSG00000125703	ATG4C	autophagy related 4C, cysteine peptidase	-1.11272	1.81e-79
ENSG00000069275	NUCKS1	nuclear casein kinase and cyclin-dependent kinase substrate 1	-2.08203	1.69e-164
ENSG00000115306	SPTBN1	spectrin, beta, non-erythrocytic 1	-2.58351	2.36e-190
ENSG00000123485	HJURP	Holliday junction recognition protein	-1.04149	3.5e-64
ENSG00000100784	RPS6KA5	ribosomal protein S6 kinase, 90kDa, polypeptide 5	-1.98958	1.18e-225
ENSG00000130304	SLC27A1	solute carrier family 27 (fatty acid transporter), member 1	-1.89048	0
ENSG00000241935	HOGA1	4-hydroxy-2-oxoglutarate aldolase 1	-3.21984	6.89e-102
ENSG00000241978	AKAP2	A kinase (PRKA) anchor protein 2	-1.23872	5.64e-07
ENSG00000130024	PHF10	PHD finger protein 10	-1.73107	8.54e-160
ENSG00000165891	E2F7	E2F transcription factor 7	-1.0292	6.46e-45
ENSG00000138182	KIF20B	kinesin family member 20B	-1.91806	5.58e-224
ENSG00000172458	IL17D	interleukin 17D	-1.30705	6.42e-32
ENSG00000182670	TTC3	tetratricopeptide repeat domain 3	-1.1522	2.41e-187
ENSG00000154358	OBSCN	obscurin, cytoskeletal calmodulin and titin-interacting RhoGEF	-1.84802	3.71e-141
ENSG00000140950	KIAA1609	KIAA1609	-1.21649	6.4e-51
ENSG00000266189	MIR3186	microRNA 3186	-2.46106	6.42e-08
ENSG00000129515	SNX6	sorting nexin 6	-1.17333	1.64e-164
ENSG00000165996	PTPLA	protein tyrosine phosphatase-like (proline instead of catalytic arginine), member A	-1.80489	1.57e-41
ENSG00000136160	EDNRB	endothelin receptor type B	-1.60078	6.01e-48
ENSG00000170959	DCDC5	doublecortin domain containing 5	-1.86835	0.000605325
ENSG00000166428	PLD4	phospholipase D family, member 4	-1.67022	0.000237372
ENSG00000111727	HCFC2	host cell factor C2	-1.07262	5.28e-62
ENSG00000165730	STOX1	storkhead box 1	-2.04419	1.03e-14
ENSG00000100266	PACSIN2	protein kinase C and casein kinase substrate in neurons 2	-1.89597	0
ENSG00000133321	RARRES3	retinoic acid receptor responder (tazarotene induced) 3	-3.04097	5.56e-17
ENSG00000075089	ACTR6	ARP6 actin-related protein 6 homolog (yeast)	-1.7275	1.01e-154
ENSG00000163931	TKT	transketolase	-1.099	7.31e-76
ENSG00000064309	CDON	Cdon homolog (mouse)	-1.21581	8.43e-38
ENSG00000114993	RTKN	rhotekin	-1.57187	1.74e-76
ENSG00000173436	MINOS1	mitochondrial inner membrane organizing system 1	-1.67912	7.56e-210
ENSG00000219200	RNASEK	ribonuclease, RNase K	-1.20029	1.63e-17
ENSG00000148848	ADAM12	ADAM metallopeptidase domain 12	-3.76467	1.59e-252
ENSG00000116396	KCNC4	potassium voltage-gated channel, Shaw-related subfamily, member 4	-1.20792	8.38e-27
ENSG00000100417	PMM1	phosphomannomutase 1	-1.01941	1.37e-86
ENSG00000177483	RBM44	RNA binding motif protein 44	-1.55929	1.61e-07
ENSG00000117016	RIMS3	regulating synaptic membrane exocytosis 3	-2.90812	1.27e-41
ENSG00000198758	EPS8L3	EPS8-like 3	-2.08505	0.00557374
ENSG00000174788	PCP2	Purkinje cell protein 2	-1.45575	0.00011878
ENSG00000179776	CDH5	cadherin 5, type 2 (vascular endothelium)	-1.99102	1.65e-05
ENSG00000178764	ZHX2	zinc fingers and homeoboxes 2	-1.66887	1.34e-87
ENSG00000163520	FBLN2	fibulin 2	-1.98059	0.000129735
ENSG00000121067	SPOP	speckle-type POZ protein	-1.0115	5.92e-52
ENSG00000130164	LDLR	low density lipoprotein receptor	-1.41411	8.82e-171
ENSG00000175536	LIPT2	lipoyl(octanoyl) transferase 2 (putative)	-1.70888	5.4e-15
ENSG00000163346	PBXIP1	pre-B-cell leukemia homeobox interacting protein 1	-1.54004	4.19e-71
ENSG00000213930	GALT	galactose-1-phosphate uridylyltransferase	-1.61152	1.01e-204
ENSG00000082996	RNF13	ring finger protein 13	-1.20903	4.76e-159
ENSG00000133424	LARGE	like-glycosyltransferase	-2.33958	0
ENSG00000157184	CPT2	carnitine palmitoyltransferase 2	-2.35125	0
ENSG00000064687	ABCA7	ATP-binding cassette, sub-family A (ABC1), member 7	-2.14505	2.97e-114
ENSG00000122378	FAM213A	family with sequence similarity 213, member A	-1.5256	1.6e-286
ENSG00000264539	MIR548AR	microRNA 548ar	-2.13393	0.000312244
ENSG00000118246	FASTKD2	FAST kinase domains 2	-1.05206	2.83e-167
ENSG00000233610	LINC00462	long intergenic non-protein coding RNA 462	-2.63784	1.2e-13
ENSG00000116885	OSCP1	organic solute carrier partner 1	-1.58584	2.25e-63
ENSG00000140391	TSPAN3	tetraspanin 3	-1.82619	8.69e-290
ENSG00000122223	CD244	CD244 molecule, natural killer cell receptor 2B4	-1.90386	1.88e-06
ENSG00000185101	ANO9	anoctamin 9	-1.91916	2.47e-09
ENSG00000183733	FIGLA	folliculogenesis specific basic helix-loop-helix	-2.0312	0.0141372
ENSG00000151229	SLC2A13	solute carrier family 2 (facilitated glucose transporter), member 13	-1.13412	5.47e-30
ENSG00000135624	CCT7	chaperonin containing TCP1, subunit 7 (eta)	-1.71243	5.74e-266
ENSG00000115750	TAF1B	TATA box binding protein (TBP)-associated factor, RNA polymerase I, B, 63kDa	-1.18734	3.23e-34
ENSG00000143340	FAM163A	family with sequence similarity 163, member A	-3.97843	1.5e-12
ENSG00000163331	DAPL1	death associated protein-like 1	-1.88446	0.0160376
ENSG00000184486	POU3F2	POU class 3 homeobox 2	-2.20507	8.01e-97
ENSG00000236104	ZBTB22	zinc finger and BTB domain containing 22	-1.31549	2.85e-49
ENSG00000040608	RTN4R	reticulon 4 receptor	-2.27551	1.33e-90
ENSG00000168758	SEMA4C	sema domain, immunoglobulin domain (Ig), transmembrane domain (TM) and short cytoplasmic domain, (semaphorin) 4C	-1.38073	9.2e-76
ENSG00000110876	SELPLG	selectin P ligand	-1.78985	6.58e-10
ENSG00000141385	AFG3L2	AFG3 ATPase family gene 3-like 2 (S. cerevisiae)	-1.36756	6.5e-87
ENSG00000221598	MIR1249	microRNA 1249	-1.73589	0.000707907
ENSG00000144560	VGLL4	vestigial like 4 (Drosophila)	-1.12807	4.42e-72
ENSG00000145949	MYLK4	myosin light chain kinase family, member 4	-1.15286	0.000700097
ENSG00000101850	GPR143	G protein-coupled receptor 143	-2.30185	0
ENSG00000141570	CBX8	chromobox homolog 8	-1.28189	3.13e-50
ENSG00000167094	TTC16	tetratricopeptide repeat domain 16	-1.33543	5.07e-05
ENSG00000178821	TMEM52	transmembrane protein 52	-1.55916	4.51e-06
ENSG00000114446	IFT57	intraflagellar transport 57 homolog (Chlamydomonas)	-1.91873	1.8e-142
ENSG00000073050	XRCC1	X-ray repair complementing defective repair in Chinese hamster cells 1	-1.18458	2.38e-98
ENSG00000180596	HIST1H2BC	histone cluster 1, H2bc	-1.16092	1.81e-06
ENSG00000087842	PIR	pirin (iron-binding nuclear protein)	-2.30759	3.25e-98
ENSG00000198211	TUBB3	tubulin, beta 3 class III	-1.83874	0.0280973
ENSG00000173868	PHOSPHO1	phosphatase, orphan 1	-2.2907	1.92e-15
ENSG00000240771	ARHGEF25	Rho guanine nucleotide exchange factor (GEF) 25	-1.61221	7.16e-92
ENSG00000128285	MCHR1	melanin-concentrating hormone receptor 1	-1.3283	2.47e-08
ENSG00000178403	NEUROG2	neurogenin 2	-1.76166	1.76e-08
ENSG00000198574	SH2D1B	SH2 domain containing 1B	-2.42718	0.000430941
ENSG00000138246	DNAJC13	DnaJ (Hsp40) homolog, subfamily C, member 13	-1.93823	0
ENSG00000107669	ATE1	arginyltransferase 1	-1.14749	1.48e-62
ENSG00000170624	SGCD	sarcoglycan, delta (35kDa dystrophin-associated glycoprotein)	-1.86082	6.62e-40
ENSG00000111077	TENC1	tensin like C1 domain containing phosphatase (tensin 2)	-1.40049	6.63e-38
ENSG00000124541	RRP36	ribosomal RNA processing 36 homolog (S. cerevisiae)	-1.19837	1.42e-134
ENSG00000182185	RAD51B	RAD51 homolog B (S. cerevisiae)	-1.13939	5.25e-32
ENSG00000135414	GDF11	growth differentiation factor 11	-4.07208	0
ENSG00000134201	GSTM5	glutathione S-transferase mu 5	-2.31523	9.12e-05
ENSG00000203722	RAET1G	retinoic acid early transcript 1G	-2.11749	0.000110108
ENSG00000186193	SAPCD2	suppressor APC domain containing 2	-2.0291	1.2e-124
ENSG00000155158	TTC39B	tetratricopeptide repeat domain 39B	-1.84783	5.3e-51
ENSG00000125817	CENPB	centromere protein B, 80kDa	-1.36259	1.16e-179
ENSG00000103227	LMF1	lipase maturation factor 1	-3.07855	2.13e-198
ENSG00000141540	TTYH2	tweety homolog 2 (Drosophila)	-1.95538	0
ENSG00000161267	BDH1	3-hydroxybutyrate dehydrogenase, type 1	-1.53344	2.2e-213
ENSG00000035928	RFC1	replication factor C (activator 1) 1, 145kDa	-1.16452	5.46e-92
ENSG00000180879	SSR4	signal sequence receptor, delta	-1.68894	1.55e-199
ENSG00000198824	CHAMP1	chromosome alignment maintaining phosphoprotein 1	-1.04233	1.21e-20
ENSG00000178163	ZNF518B	zinc finger protein 518B	-1.21716	5.57e-60
ENSG00000256049	PADI6	peptidyl arginine deiminase, type VI	-2.4606	0.00206169
ENSG00000156298	TSPAN7	tetraspanin 7	-1.83214	0.000194419
ENSG00000115183	TANC1	tetratricopeptide repeat, ankyrin repeat and coiled-coil containing 1	-1.0246	1.4e-64
ENSG00000136636	KCTD3	potassium channel tetramerisation domain containing 3	-1.6748	0
ENSG00000116667	C1orf21	chromosome 1 open reading frame 21	-1.21126	1.99e-75
ENSG00000075643	MOCOS	molybdenum cofactor sulfurase	-1.20527	1.14e-62
ENSG00000215045	GRID2IP	glutamate receptor, ionotropic, delta 2 (Grid2) interacting protein	-2.75182	8.84e-11
ENSG00000138756	BMP2K	BMP2 inducible kinase	-1.10975	1.63e-38
ENSG00000131779	PEX11B	peroxisomal biogenesis factor 11 beta	-1.60836	1.9e-176
ENSG00000101400	SNTA1	syntrophin, alpha 1	-2.41982	2.45e-112
ENSG00000103657	HERC1	HECT and RLD domain containing E3 ubiquitin protein ligase family member 1	-1.07222	8.21e-42
ENSG00000116254	CHD5	chromodomain helicase DNA binding protein 5	-1.434	4.83e-05
ENSG00000250305	KIAA1456	Putative methyltransferase KIAA1456	-1.11425	1.06e-08
ENSG00000138688	KIAA1109	KIAA1109	-1.06381	2.9e-29
ENSG00000167131	CCDC103	coiled-coil domain containing 103	-1.55516	0.0189693
ENSG00000099622	CIRBP	cold inducible RNA binding protein	-1.14761	7.23e-76
ENSG00000131771	PPP1R1B	protein phosphatase 1, regulatory (inhibitor) subunit 1B	-1.53573	0.00906669
ENSG00000183255	PTTG1IP	pituitary tumor-transforming 1 interacting protein	-1.53991	0
ENSG00000006047	YBX2	Y box binding protein 2	-2.64907	1.03e-07
ENSG00000165548	TMEM63C	transmembrane protein 63C	-2.14653	0.00288168
ENSG00000143850	PLEKHA6	pleckstrin homology domain containing, family A member 6	-1.00724	0.00357247
ENSG00000112685	EXOC2	exocyst complex component 2	-2.16619	0
ENSG00000144567	FAM134A	family with sequence similarity 134, member A	-1.36396	0
ENSG00000167487	KLHL26	kelch-like 26 (Drosophila)	-1.13968	2.14e-47
ENSG00000186666	BCDIN3D	BCDIN3 domain containing	-1.75286	2.2e-28
ENSG00000182534	MXRA7	matrix-remodelling associated 7	-1.63083	2.71e-135
ENSG00000117461	PIK3R3	phosphoinositide-3-kinase, regulatory subunit 3 (gamma)	-1.91497	1.83e-161
ENSG00000167549	CORO6	coronin 6	-1.42674	7.4e-22
ENSG00000136643	RPS6KC1	ribosomal protein S6 kinase, 52kDa, polypeptide 1	-1.34694	7.31e-178
ENSG00000115257	PCSK4	proprotein convertase subtilisin/kexin type 4	-2.38835	2.9e-46
ENSG00000153933	DGKE	diacylglycerol kinase, epsilon 64kDa	-1.50045	4.73e-21
ENSG00000089101	C20orf26	chromosome 20 open reading frame 26	-2.90774	2.27e-132
ENSG00000213445	SIPA1	signal-induced proliferation-associated 1	-1.27968	2.18e-148
ENSG00000214530	STARD10	StAR-related lipid transfer (START) domain containing 10	-2.06125	1.51e-82
ENSG00000116161	CACYBP	calcyclin binding protein	-1.19324	3.2e-184
ENSG00000160199	PKNOX1	PBX/knotted 1 homeobox 1	-1.03022	3.19e-33
ENSG00000144815	NXPE3	neurexophilin and PC-esterase domain family, member 3	-1.54595	4.86e-200
ENSG00000185432	METTL7A	methyltransferase like 7A	-1.5963	1.23e-44
ENSG00000004139	SARM1	sterile alpha and TIR motif containing 1	-1.07333	1.82e-35
ENSG00000131650	KREMEN2	kringle containing transmembrane protein 2	-1.85657	1.58e-48
ENSG00000136235	GPNMB	glycoprotein (transmembrane) nmb	-2.41299	0
ENSG00000113448	PDE4D	phosphodiesterase 4D, cAMP-specific	-1.13083	1.99e-158
ENSG00000175746	C15orf54	chromosome 15 open reading frame 54	-2.58485	3.8e-06
ENSG00000159733	ZFYVE28	zinc finger, FYVE domain containing 28	-2.21951	5.08e-186
ENSG00000152475	ZNF837	zinc finger protein 837	-1.58846	1.46e-14
ENSG00000172339	ALG14	asparagine-linked glycosylation 14 homolog (S. cerevisiae)	-1.07096	4.03e-37
ENSG00000138798	EGF	epidermal growth factor	-2.91942	1.12e-21
ENSG00000101439	CST3	cystatin C	-1.60009	8.73e-197
ENSG00000155850	SLC26A2	solute carrier family 26 (sulfate transporter), member 2	-1.15694	6.12e-44
ENSG00000134917	ADAMTS8	ADAM metallopeptidase with thrombospondin type 1 motif, 8	-2.56652	0.000587797
ENSG00000090674	MCOLN1	mucolipin 1	-1.52682	2.53e-89
ENSG00000157343	ARMC12	armadillo repeat containing 12	-1.01394	0.0205686
ENSG00000147586	MRPS28	mitochondrial ribosomal protein S28	-2.31044	3.07e-218
ENSG00000100271	TTLL1	tubulin tyrosine ligase-like family, member 1	-1.56572	5.65e-106
ENSG00000189195	BTBD8	BTB (POZ) domain containing 8	-1.20212	7.22e-09
ENSG00000204291	COL15A1	collagen, type XV, alpha 1	-1.09546	3.01e-16
ENSG00000173137	ADCK5	aarF domain containing kinase 5	-1.08646	1.72e-47
ENSG00000170502	NUDT9	nudix (nucleoside diphosphate linked moiety X)-type motif 9	-1.15881	1.73e-116
ENSG00000123096	SSPN	sarcospan	-3.36392	2.73e-24
ENSG00000115525	ST3GAL5	ST3 beta-galactoside alpha-2,3-sialyltransferase 5	-1.64369	1.72e-214
ENSG00000012048	BRCA1	breast cancer 1, early onset	-1.37159	4.82e-43
ENSG00000180902	D2HGDH	D-2-hydroxyglutarate dehydrogenase	-1.28291	2.41e-33
ENSG00000146963	LUC7L2	LUC7-like 2 (S. cerevisiae)	-1.40794	1.14e-256
ENSG00000198586	TLK1	tousled-like kinase 1	-1.21413	5.78e-130
ENSG00000157870	FAM213B	family with sequence similarity 213, member B	-1.84416	1.66e-234
ENSG00000156515	HK1	hexokinase 1	-1.31653	1.19e-270
ENSG00000111728	ST8SIA1	ST8 alpha-N-acetyl-neuraminide alpha-2,8-sialyltransferase 1	-2.00477	2.63e-82
ENSG00000172345	STARD5	StAR-related lipid transfer (START) domain containing 5	-1.30286	2.34e-28
ENSG00000112964	GHR	growth hormone receptor	-3.57473	5.07e-168
ENSG00000167136	ENDOG	endonuclease G	-1.88089	2.33e-28
ENSG00000129355	CDKN2D	cyclin-dependent kinase inhibitor 2D (p19, inhibits CDK4)	-1.22938	1.57e-54
ENSG00000177830	CHID1	chitinase domain containing 1	-1.22551	5.14e-96
ENSG00000188505	NCCRP1	non-specific cytotoxic cell receptor protein 1 homolog (zebrafish)	-1.15838	5.42e-05
ENSG00000139625	MAP3K12	mitogen-activated protein kinase kinase kinase 12	-2.1916	3.57e-167
ENSG00000130830	MPP1	membrane protein, palmitoylated 1, 55kDa	-1.47374	2.41e-74
ENSG00000077585	GPR137B	G protein-coupled receptor 137B	-1.946	4.85e-226
ENSG00000117410	ATP6V0B	ATPase, H+ transporting, lysosomal 21kDa, V0 subunit b	-1.23559	4.81e-150
ENSG00000114251	WNT5A	wingless-type MMTV integration site family, member 5A	-1.12648	8.23e-11
ENSG00000115091	ACTR3	ARP3 actin-related protein 3 homolog (yeast)	-1.64163	1.65e-294
ENSG00000143799	PARP1	poly (ADP-ribose) polymerase 1	-1.90794	1.28e-261
ENSG00000174738	NR1D2	nuclear receptor subfamily 1, group D, member 2	-1.24736	1.08e-72
ENSG00000177628	GBA	glucosidase, beta, acid	-3.16105	0
ENSG00000178425	NT5DC1	5'-nucleotidase domain containing 1	-1.77601	3.26e-73
ENSG00000160007	ARHGAP35	Rho GTPase activating protein 35	-1.77528	0
ENSG00000142166	IFNAR1	interferon (alpha, beta and omega) receptor 1	-1.19026	1.81e-62
ENSG00000100075	SLC25A1	solute carrier family 25 (mitochondrial carrier; citrate transporter), member 1	-1.47324	1.02e-69
ENSG00000198728	LDB1	LIM domain binding 1	-1.30344	0
ENSG00000188783	PRELP	proline/arginine-rich end leucine-rich repeat protein	-1.53102	3.1e-13
ENSG00000102870	ZNF629	zinc finger protein 629	-1.52443	4.71e-53
ENSG00000150768	DLAT	dihydrolipoamide S-acetyltransferase	-1.25633	2.68e-84
ENSG00000110063	DCPS	decapping enzyme, scavenger	-1.07445	2.91e-110
ENSG00000169660	HEXDC	hexosaminidase (glycosyl hydrolase family 20, catalytic domain) containing	-1.52559	4.95e-83
ENSG00000116793	PHTF1	putative homeodomain transcription factor 1	-1.36196	7.38e-100
ENSG00000118600	TMEM5	transmembrane protein 5	-1.96152	3.12e-181
ENSG00000070540	WIPI1	WD repeat domain, phosphoinositide interacting 1	-2.78738	0
ENSG00000203685	C1orf95	chromosome 1 open reading frame 95	-2.4757	0.00059201
ENSG00000108641	B9D1	B9 protein domain 1	-1.12017	1.22e-36
ENSG00000114547	ROPN1B	rhophilin associated tail protein 1B	-1.58217	1.82e-13
ENSG00000198825	INPP5F	inositol polyphosphate-5-phosphatase F	-1.01954	2.21e-47
ENSG00000126861	OMG	oligodendrocyte myelin glycoprotein	-1.23569	0.00401566
ENSG00000165091	TMC1	transmembrane channel-like 1	-1.06307	0.000589482
ENSG00000151835	SACS	spastic ataxia of Charlevoix-Saguenay (sacsin)	-1.84522	1.25e-192
ENSG00000165533	TTC8	tetratricopeptide repeat domain 8	-1.61473	0
ENSG00000115109	EPB41L5	erythrocyte membrane protein band 4.1 like 5	-1.02585	3.91e-87
ENSG00000141582	CBX4	chromobox homolog 4	-1.36334	5.35e-120
ENSG00000198948	MFAP3L	microfibrillar-associated protein 3-like	-1.61154	3.43e-82
ENSG00000137944	CCBL2	cysteine conjugate-beta lyase 2	-2.66617	0
ENSG00000122779	TRIM24	tripartite motif containing 24	-1.35972	1.37e-86
ENSG00000147123	NDUFB11	NADH dehydrogenase (ubiquinone) 1 beta subcomplex, 11, 17.3kDa	-1.01017	1.5e-86
ENSG00000135540	NHSL1	NHS-like 1	-2.51557	1.1e-242
ENSG00000144674	GOLGA4	golgin A4	-1.87489	0
ENSG00000145362	ANK2	ankyrin 2, neuronal	-1.84159	1.82e-95
ENSG00000136824	SMC2	structural maintenance of chromosomes 2	-1.51811	1.69e-195
ENSG00000049618	ARID1B	AT rich interactive domain 1B (SWI1-like)	-1.54422	3.19e-121
ENSG00000230359	TPI1P2	triosephosphate isomerase 1 pseudogene 2	-1.44159	0.000120431
ENSG00000109084	TMEM97	transmembrane protein 97	-1.22766	6.47e-58
ENSG00000111540	RAB5B	RAB5B, member RAS oncogene family	-2.37444	0
ENSG00000103266	STUB1	STIP1 homology and U-box containing protein 1, E3 ubiquitin protein ligase	-1.31815	1.24e-138
ENSG00000137267	TUBB2A	tubulin, beta 2A class IIa	-1.34058	4.72e-276
ENSG00000158104	HPD	4-hydroxyphenylpyruvate dioxygenase	-1.00894	0.0346376
ENSG00000189403	HMGB1	high mobility group box 1	-1.01785	1.12e-67
ENSG00000175938	ORAI3	ORAI calcium release-activated calcium modulator 3	-1.28043	6.96e-53
ENSG00000177692	DNAJC28	DnaJ (Hsp40) homolog, subfamily C, member 28	-1.06555	3.79e-08
ENSG00000130768	SMPDL3B	sphingomyelin phosphodiesterase, acid-like 3B	-1.76533	1.9e-05
ENSG00000139734	DIAPH3	diaphanous homolog 3 (Drosophila)	-1.27734	1.48e-36
ENSG00000137831	UACA	uveal autoantigen with coiled-coil domains and ankyrin repeats	-1.03938	5.91e-56
ENSG00000153790	C7orf31	chromosome 7 open reading frame 31	-1.30032	2.12e-30
ENSG00000168090	COPS6	COP9 constitutive photomorphogenic homolog subunit 6 (Arabidopsis)	-1.15467	4.75e-172
ENSG00000043462	LCP2	lymphocyte cytosolic protein 2 (SH2 domain containing leukocyte protein of 76kDa)	-2.50637	9.44e-18
ENSG00000169885	CALML6	calmodulin-like 6	-2.47139	1.46e-11
ENSG00000067836	ROGDI	rogdi homolog (Drosophila)	-1.17272	7.54e-46
ENSG00000186635	ARAP1	ArfGAP with RhoGAP domain, ankyrin repeat and PH domain 1	-2.02862	4.25e-298

## Sheet: BRG1_10kb-bound_Down-Ontology
Category	Term	Count	%	PValue	Genes	List Total	Pop Hits	Pop Total	Fold Enrichment	Bonferroni	Benjamini	FDR
GOTERM_BP_FAT	GO:0043473~pigmentation	17	1.2937595129375952	3.832485235950294E-6	SOX10, SLC45A2, BBS5, MLPH, HPS3, MITF, DOCK7, GPR143, DCT, EDNRB, BBS2, TYR, BCL2, LYST, ASIP, OCA2, RAB27A	1003	59	13528	3.8862395863257686	0.012707595639433134	0.012707595639433134	0.006982632380747589
GOTERM_BP_FAT	GO:0048066~pigmentation during development	11	0.837138508371385	8.429114174059672E-6	DCT, SOX10, SLC45A2, EDNRB, TYR, MLPH, BCL2, MITF, GPR143, OCA2, RAB27A	1003	26	13528	5.706265817930823	0.027736161478555843	0.013965599727147393	0.015356895748519506
GOTERM_BP_FAT	GO:0032870~cellular response to hormone stimulus	25	1.9025875190258752	3.832451561250397E-5	ADCY2, ERBB3, PGF, STAT5A, STAT5B, RHOQ, PRKAR2B, EIF4EBP2, PCSK9, PRKACB, PIK3R3, GNG5, GHR, GNG7, STAT1, LPIN1, PTPN11, ZFP106, GNG10, ALDH2, PTPN1, PARP1, IGFBP2, ASIP, VLDLR	1003	133	13528	2.5352513886910697	0.12005102777727417	0.04173455133223314	0.06980497748845238
GOTERM_BP_FAT	GO:0007167~enzyme linked receptor protein signaling pathway	46	3.50076103500761	1.1383123217437386E-4	FMOD, ERBB3, STAT5A, ATP6AP1, STAT5B, BMPR2, RHOQ, FSTL1, STUB1, TGFB2, EIF4EBP2, ZFYVE16, AGRN, SHC3, PIK3R3, EGF, RAPGEF1, GNG7, ADAM9, GHR, AMHR2, NIN, FIBP, MYO1E, MET, TGFBR2, TRIO, DUSP22, PTPRU, PTPN11, RPS6KA5, EPHA4, DOK1, ZFP106, EPS8, HIPK2, JAK1, TGFBR3, SORT1, SPTBN1, JAK3, PTPN1, BAMBI, HPGD, LCP2, TOB1	1003	342	13528	1.8141132159078321	0.31605408975646954	0.09059897526769722	0.2071995737076282
GOTERM_BP_FAT	GO:0009725~response to hormone stimulus	48	3.65296803652968	1.572786847321473E-4	ME1, A2M, ADCY2, LDLR, PGF, ERBB3, STAT5A, STAT5B, RHOQ, VGF, TIMP3, TGFB2, PRKAR2B, EIF4EBP2, BCL2, MSI1, ENO2, PCSK9, IDH1, PRKACB, PIK3R3, GNG5, CCNA2, GNG7, SPP1, ADAM9, GHR, BSG, EGR2, TGFBR2, PTPRU, NR4A3, CPS1, STAT1, LPIN1, BRCA1, PTPN11, ZFP106, GNG10, ARSA, ALDH2, TGFBR3, SORT1, PTPN1, IGFBP2, PARP1, ASIP, VLDLR	1003	367	13528	1.7640375875099499	0.408373791613604	0.099653914071821	0.28617709708329553
GOTERM_BP_FAT	GO:0006582~melanin metabolic process	6	0.45662100456621	2.1611428049200533E-4	DCT, SLC45A2, TYR, BCL2, ASIP, OCA2	1003	9	13528	8.991691591890994	0.5138564329056206	0.11326451024311046	0.3930325835948656
GOTERM_BP_FAT	GO:0030318~melanocyte differentiation	7	0.532724505327245	2.909852973463343E-4	SOX10, EDNRB, MLPH, BCL2, MITF, OCA2, RAB27A	1003	14	13528	6.743768693918245	0.6213561557410014	0.12954310139358727	0.5288546493015689
GOTERM_BP_FAT	GO:0006006~glucose metabolic process	25	1.9025875190258752	3.617169847780554E-4	PPARD, ONECUT1, CREM, HK1, OGDH, G6PC3, UEVLD, PPP1R3B, ENO2, GYS1, PIK3CA, AGL, GALT, GYG2, DLAT, CPS1, PPARGC1A, CPT1A, GPI, PPP1CA, PYGL, PGM1, PKLR, DCXR, MDH1	1003	153	13528	2.2038459784046553	0.7009869126143287	0.14007361480050262	0.6570068307159893
GOTERM_BP_FAT	GO:0040014~regulation of multicellular organism growth	14	1.06544901065449	4.336119468890632E-4	STAT5A, STAT5B, AFG3L2, VGF, PTPN11, BBS2, APP, AGPAT6, HTRA2, BCL2, PIK3CA, POU3F2, GPAM, GHR	1003	61	13528	3.0955003840936204	0.7647900754707706	0.14854492563942134	0.7871067192869452
GOTERM_BP_FAT	GO:0050931~pigment cell differentiation	7	0.532724505327245	4.5470027481609105E-4	SOX10, EDNRB, MLPH, BCL2, MITF, OCA2, RAB27A	1003	15	13528	6.294184114323696	0.780780087852923	0.1408124012314057	0.8252372409912945
GOTERM_BP_FAT	GO:0006091~generation of precursor metabolites and energy	41	3.1202435312024352	4.8196270286020716E-4	UQCRC2, TMX1, MCHR1, PPARD, TMX4, ATP6AP1, HK1, OGDH, VGF, ATP6V0B, UEVLD, PPP1R3B, ENO2, GYS1, IDH1, NFATC4, CAT, AGL, NDUFB11, NOX5, SUCLG2, ACO1, ATP6V1H, GYG2, DLAT, CPS1, PPARGC1A, NDUFV3, SDHB, GPI, PPP1CA, NNT, SLC25A13, PYGL, ATP6V1E1, PKLR, PGM1, ATP6V0A1, ATP6V0A4, ASIP, MDH1	1003	313	13528	1.7667381242852909	0.7998518099647844	0.1360541651850392	0.8745108364406229
GOTERM_BP_FAT	GO:0000902~cell morphogenesis	45	3.4246575342465753	5.413508065779237E-4	NRP2, SHROOM1, BBS5, LIMS1, SHROOM4, ONECUT1, ERBB3, CNP, SOX6, TTC8, TGFB2, APP, DAB2, CRB1, ROBO1, BCL2, ROBO2, CLASP2, LAMB1, SPON2, TOP2B, APC, NOX4, CAP2, EGR2, RTN4R, STXBP1, DOCK7, NEUROG2, AFG3L2, GAS7, NTN1, PTPN11, NCAM2, EPHA4, BBS2, SEMA6A, P2RX7, S100B, TGFBR3, BIN3, LAMC1, UBB, IFT88, MYH10	1003	356	13528	1.704885343968096	0.8358503537147539	0.13979229302316198	0.9817676821805787
GOTERM_BP_FAT	GO:0022604~regulation of cell morphogenesis	22	1.67427701674277	6.145885407195847E-4	LZTS1, PLXNB1, RTN4R, RHOQ, NTN1, GAS7, TTC3, MBP, TGFB2, ACTR3, YWHAH, ROBO1, ITGA7, TGFBR3, ROBO2, POU3F2, CFDP1, OMG, AKAP2, ARAP1, MYH10, SPP1	1003	131	13528	2.265082614751166	0.8714596534500503	0.14598681778278721	1.1138863758139106
GOTERM_BP_FAT	GO:0007010~cytoskeleton organization	52	3.95738203957382	7.446536550436885E-4	KIF23, CROCC, WASF1, VPS54, RHOQ, CNP, ARHGAP4, GSN, PACSIN2, MICAL1, DYNC1H1, FMNL2, KIF11, ARHGEF17, WAS, LPIN1, BBS2, MAST1, EPB41L1, TPPP, LIMCH1, SDCBP, SGCD, BIN3, PARVA, SHROOM1, HAUS5, SHROOM4, NEK2, ABLIM3, SIPA1, DIAPH3, HAUS1, CALR, DAAM2, CORO2B, NPHP4, BCL2, GRID2IP, WIPF1, CAP2, PSRC1, KIF18A, DOCK7, CAPN3, GAS7, BRCA1, SEMA6A, EPS8, CDC42BPA, ARAP1, MYH10	1003	436	13528	1.6086053765309574	0.9167439853610247	0.16268893608460133	1.3481093894627705
GOTERM_BP_FAT	GO:0009719~response to endogenous stimulus	49	3.7290715372907153	7.930640220863639E-4	A2M, ADCY2, LDLR, PGF, STAT5A, STAT5B, RHOQ, VGF, TGFB2, PRKAR2B, EIF4EBP2, PRKACB, CCNA2, GNG5, ADAM9, GHR, GNG7, BSG, EGR2, PTPRU, LPIN1, SORT1, ME1, ERBB3, TIMP3, BCL2, ENO2, MSI1, PCSK9, IDH1, PIK3R3, SPP1, TGFBR2, NR4A3, CPS1, STAT1, BRCA1, PTPN11, ZFP106, GNG10, ARSA, ALDH2, TGFBR3, PTPN1, PARP1, AACS, IGFBP2, ASIP, VLDLR	1003	405	13528	1.631825511120958	0.9291722638058376	0.1618014779395226	1.4351534573474156
GOTERM_BP_FAT	GO:0006260~DNA replication	28	2.13089802130898	7.963395764225072E-4	TMX1, HMGB1, PRIM1, TYMS, TOP1, CDC45, NT5M, CDKN2D, POLQ, EGF, TOP2A, FEN1, CCDC88A, LIG1, CENPF, TOP1MT, RBBP7, BRCA1, PURA, PNKP, DNA2, RFC1, SUPT16H, NFIA, NFIB, DSCC1, REV3L, DUT	1003	190	13528	1.9876370887337986	0.9299428414265279	0.15308313266496365	1.4410404321713144
GOTERM_BP_FAT	GO:0006101~citrate metabolic process	5	0.380517503805175	8.732177722853918E-4	ACO1, STAT5A, STAT5B, ACLY, GHR	1003	7	13528	9.633955277026065	0.9458068462973503	0.15758490035031059	1.5791140226897649
GOTERM_BP_FAT	GO:0032989~cellular component morphogenesis	48	3.65296803652968	9.163646541782601E-4	NRP2, SHROOM1, BBS5, LIMS1, SHROOM4, ONECUT1, ERBB3, CNP, SOX6, TTC8, TGFB2, FIS1, APP, DAB2, CRB1, ROBO1, BCL2, ROBO2, CLASP2, LAMB1, SPON2, TOP2B, APC, NOX4, CAP2, EGR2, RTN4R, STXBP1, CASC5, DOCK7, NEUROG2, AFG3L2, CAPN3, GAS7, NTN1, PTPN11, NCAM2, EPHA4, BBS2, SEMA6A, P2RX7, S100B, TGFBR3, BIN3, LAMC1, UBB, IFT88, MYH10	1003	397	13528	1.6307349990331275	0.9530799780466542	0.15630287920186803	1.6565259055225101
GOTERM_BP_FAT	GO:0019318~hexose metabolic process	28	2.13089802130898	9.361074012599813E-4	PPARD, ONECUT1, CREM, HK1, OGDH, G6PC3, UEVLD, PPP1R3B, ENO2, GYS1, PIK3CA, GALE, AGL, B3GALTL, GALT, GYG2, DLAT, CPS1, PPARGC1A, PMM1, CPT1A, GPI, PPP1CA, PYGL, PKLR, PGM1, DCXR, MDH1	1003	192	13528	1.966932535726155	0.9560741991454412	0.1516712332822937	1.6919281185103108
GOTERM_BP_FAT	GO:0016310~phosphorylation	84	6.392694063926941	0.0010052990404609962	UQCRC2, RNASEL, BCKDK, STAT5A, ATP6AP1, PIP5K1A, CAMKK1, TGFB2, TOP1, APP, MAP3K4, PIK3CA, TLK1, PRKACB, ADAM9, GHR, TYRO3, SGK3, PIK3CB, MYLK4, PKN2, ATP6V1H, RPS6KC1, PBK, PRKCE, TBCK, GAK, PRKCB, PDIK1L, PNKP, MAST1, EIF2AK1, HIPK2, MAPK3, BMP2K, RIPK4, ERC1, MAP3K12, ERBB3, NEK2, PTPLAD1, BLK, BMPR2, ADRBK2, PXK, ATP6V0B, TRIB2, C9ORF96, GNPTAB, BCL2, ZAP70, EGF, FYB, AMHR2, OBSCN, NIN, TGFBR…	1003	800	13528	1.4161914257228316	0.9651384319563612	0.15449273060749547	1.81590582580341
GOTERM_BP_FAT	GO:0010769~regulation of cell morphogenesis involved in differentiation	15	1.141552511415525	0.0014086780695569982	LZTS1, PLXNB1, RTN4R, NTN1, TTC3, TGFB2, MBP, ACTR3, YWHAH, ROBO1, TGFBR3, POU3F2, ROBO2, OMG, SPP1	1003	77	13528	2.6274423482798355	0.9909416904354316	0.2006876350096759	2.5357443403557944
GOTERM_BP_FAT	GO:0006631~fatty acid metabolic process	28	2.13089802130898	0.001490895650732224	SLC27A1, PPARD, CPT2, STAT5A, CREM, STAT5B, ECHS1, HADHA, ACSF2, ACOX3, PRKAR2B, CRYL1, AGPAT6, SCD5, ACSL3, ACSL6, GHR, ACAA2, SCD, ACACB, PPARGC1A, BRCA1, CPT1A, BAAT, HAO2, AACS, GPAM, HPGD	1003	198	13528	1.9073285194920289	0.9931178981227633	0.20252955745476264	2.6818501393434557
GOTERM_BP_FAT	GO:0010033~response to organic substance	76	5.78386605783866	0.0015863820371333267	A2M, KYNU, ADCY2, LDLR, PGF, STAT5A, STAT5B, RHOQ, PRDX3, XRCC1, VGF, ASAH1, TGFB2, ACTR3, PRKAR2B, EIF4EBP2, LONP2, GSN, CREB3L4, DNAJC4, PRKACB, GNG5, CCNA2, DDOST, GNG7, ADAM9, GHR, BSG, EGR2, PTPRU, LPIN1, HSPB7, HSPB2, SORT1, ME1, TF, PRF1, ERBB3, ACP5, COMT, TIMP3, TTC3, MANF, BCL2, MSI1, ENO2, IDH1, PCSK9, SCARB1, PIK3R3, SPP1, THPO, TGFBR2, NR4A3, STAT1, CPS1, BRCA1, PTPN11, ATF6, P2RX4, …	1003	721	13528	1.4217099049591861	0.9949982141702604	0.2057413367648384	2.8512756260555605
GOTERM_BP_FAT	GO:0048285~organelle fission	31	2.359208523592085	0.0016024157894018358	KIF23, KIF22, HAUS5, NEK2, TUBB2A, HAUS1, CDC16, FIS1, NCAPH, MC1R, INCENP, PBRM1, CLASP2, LMLN, CCNA2, ASPM, TUBB3, APC, KIF11, DLGAP5, KIF18A, CENPF, CDC20, PBK, SMC2, CDC25B, CCNB1, PEX11B, CCNB2, KIF20B, CIT, DSCC1	1003	229	13528	1.825823838528084	0.9952592045440661	0.19987015973479283	2.879697633215239
GOTERM_BP_FAT	GO:0042438~melanin biosynthetic process	5	0.380517503805175	0.001644134052181974	DCT, SLC45A2, TYR, ASIP, OCA2	1003	8	13528	8.429710867397805	0.9958762425645069	0.19719193923207656	2.9536121083067357
GOTERM_BP_FAT	GO:0051129~negative regulation of cellular component organization	22	1.67427701674277	0.001767515937271648	HMGB1, CST3, RTN4R, CENPF, RHOQ, NTN1, BRCA1, TTC3, ATM, MBP, YWHAH, PACSIN2, GSN, CAPG, SPTBN1, TGFBR3, CLASP2, OMG, ARAP1, APC, SPP1, SPTAN1	1003	142	13528	2.0896184685380477	0.997269906482555	0.20312272272349474	3.171903374582341
GOTERM_BP_FAT	GO:0006468~protein amino acid phosphorylation	71	5.403348554033485	0.0017982564169799421	RNASEL, BCKDK, STAT5A, CAMKK1, TGFB2, APP, MAP3K4, PIK3CA, TLK1, PRKACB, ADAM9, GHR, TYRO3, SGK3, PIK3CB, MYLK4, PKN2, RPS6KC1, PBK, PRKCE, TBCK, GAK, PRKCB, PDIK1L, MAST1, EIF2AK1, HIPK2, MAPK3, BMP2K, RIPK4, ERC1, MAP3K12, NEK2, ERBB3, PTPLAD1, BLK, BMPR2, ADRBK2, PXK, C9ORF96, TRIB2, BCL2, ZAP70, EGF, FYB, AMHR2, OBSCN, NIN, MET, TGFBR2, BIRC7, TRIO, TRIM24, MAPK10, STAT1, ATM, PTPN11, RPS6KA5…	1003	667	13528	1.4357048793649037	0.9975365281738527	0.19944596311681873	3.22621817740687
GOTERM_BP_FAT	GO:0005996~monosaccharide metabolic process	30	2.28310502283105	0.001984653202575233	PPARD, ONECUT1, CREM, FN3K, HK1, OGDH, G6PC3, UEVLD, PPP1R3B, ENO2, GYS1, PIK3CA, GALE, AGL, B3GALTL, GALT, GYG2, DLAT, CPS1, PPARGC1A, PMM1, CPT1A, GPI, PPP1CA, LARGE, PYGL, PKLR, PGM1, DCXR, MDH1	1003	222	13528	1.8226401875454716	0.9986790028538151	0.21082182328931132	3.554943164777147
GOTERM_BP_FAT	GO:0008202~steroid metabolic process	28	2.13089802130898	0.00200160378347956	HSD3B2, PPARD, CYB5R1, LDLR, HMGCR, HSD17B14, STAT5B, COMT, ACOX3, FDFT1, STARD5, C1QTNF3, OSBPL1A, PCSK9, SCARB1, CAT, SREBF1, SOAT1, ACAA2, OSBPL9, AMACR, PCTP, TECR, YWHAH, BAAT, CYP27A1, IDI1, VLDLR, CLN6	1003	202	13528	1.8695596379179293	0.9987517908899204	0.20590588495934825	3.584784403706631
GOTERM_BP_FAT	GO:0031344~regulation of cell projection organization	16	1.21765601217656	0.0021319823203803405	LZTS1, PLXNB1, RTN4R, RHOQ, NTN1, MBP, ACTR3, YWHAH, ROBO1, POU3F2, ROBO2, KBTBD10, OMG, ARAP1, APC, SPP1	1003	89	13528	2.4247258225324027	0.9991928650777098	0.2113247636442599	3.814022303321163
GOTERM_BP_FAT	GO:0010876~lipid localization	23	1.750380517503805	0.002789121891281817	SOAT1, SLC27A1, ABCA7, PPARD, CPT2, LDLR, OSBPL9, PSAP, STAT5A, PCTP, STAT5B, APOLD1, ABCA4, P2RX7, STARD5, NPC2, OSBPL1A, ATP8B2, SCARB1, PLTP, ATP8B3, APOO, VLDLR	1003	157	13528	1.9758812733773203	0.9999104132862483	0.2596668213382669	4.961617132672225
GOTERM_BP_FAT	GO:0016125~sterol metabolic process	17	1.2937595129375952	0.002964868937736795	SREBF1, SOAT1, ACAA2, PPARD, CYB5R1, LDLR, HMGCR, PCTP, FDFT1, CYP27A1, OSBPL1A, PCSK9, SCARB1, CAT, IDI1, VLDLR, CLN6	1003	101	13528	2.270179560328914	0.9999502481824941	0.2662885784457455	5.266332389809081
GOTERM_BP_FAT	GO:0006796~phosphate metabolic process	96	7.30593607305936	0.0029703945311556775	UQCRC2, RNASEL, BCKDK, STAT5A, ATP6AP1, PIP5K1A, CAMKK1, TGFB2, TOP1, APP, MAP3K4, PIK3CA, TLK1, PRKACB, GHR, ADAM9, TYRO3, SGK3, PIK3CB, MYLK4, PKN2, ATP6V1H, RPS6KC1, PTPRU, PBK, PRKCE, TBCK, GAK, SACM1L, PRKCB, PDIK1L, PNKP, PPP1CA, MAST1, EIF2AK1, HIPK2, MAPK3, BMP2K, RIPK4, ERC1, MAP3K12, ERBB3, NEK2, PTPLAD1, BLK, BMPR2, ADRBK2, ACP5, PTPMT1, PXK, ATP6V0B, TRIB2, G6PC3, C9ORF96, MTMR1, GNPT…	1003	973	13528	1.3307333907834564	0.9999511598262033	0.2597866987611209	5.27589783331357
GOTERM_BP_FAT	GO:0006793~phosphorus metabolic process	96	7.30593607305936	0.0029703945311556775	UQCRC2, RNASEL, BCKDK, STAT5A, ATP6AP1, PIP5K1A, CAMKK1, TGFB2, TOP1, APP, MAP3K4, PIK3CA, TLK1, PRKACB, GHR, ADAM9, TYRO3, SGK3, PIK3CB, MYLK4, PKN2, ATP6V1H, RPS6KC1, PTPRU, PBK, PRKCE, TBCK, GAK, SACM1L, PRKCB, PDIK1L, PNKP, PPP1CA, MAST1, EIF2AK1, HIPK2, MAPK3, BMP2K, RIPK4, ERC1, MAP3K12, ERBB3, NEK2, PTPLAD1, BLK, BMPR2, ADRBK2, ACP5, PTPMT1, PXK, ATP6V0B, TRIB2, G6PC3, C9ORF96, MTMR1, GNPT…	1003	973	13528	1.3307333907834564	0.9999511598262033	0.2597866987611209	5.27589783331357
GOTERM_BP_FAT	GO:0008203~cholesterol metabolic process	16	1.21765601217656	0.0029746634698059582	SOAT1, SREBF1, ACAA2, PPARD, LDLR, HMGCR, PCTP, FDFT1, CYP27A1, OSBPL1A, PCSK9, SCARB1, CAT, IDI1, VLDLR, CLN6	1003	92	13528	2.3456586761454767	0.9999518526891047	0.2535223235657955	5.283287236521083
GOTERM_BP_FAT	GO:0051640~organelle localization	16	1.21765601217656	0.0029746634698059582	BBS5, NIN, MLPH, DLGAP5, KIF18A, NLGN1, CENPF, WIPI1, NTN1, SEMA6A, BBS2, TMED10, ASIP, ASPM, MYH10, RAB27A	1003	92	13528	2.3456586761454767	0.9999518526891047	0.2535223235657955	5.283287236521083
GOTERM_BP_FAT	GO:0030030~cell projection organization	43	3.272450532724505	0.003328334163969507	NRP2, BBS5, ONECUT1, CROCC, ERBB3, CNP, TTC8, MTSS1L, APP, ROBO1, TTC30A, TTC30B, BCL2, ROBO2, LAMB1, TOP2B, SPON2, APC, DNM3, EGR2, CCDC88A, VAV3, RTN4R, STXBP1, DOCK7, NEUROG2, AFG3L2, LPIN1, GAS7, NTN1, PTPN11, NCAM2, EPHA4, BBS2, SEMA6A, P2RX7, S100B, CAPG, PHGDH, SDCBP, UBB, IFT88, MYH10	1003	368	13528	1.5759894230352423	0.9999852633879271	0.2722969107283333	5.893591777312491
GOTERM_BP_FAT	GO:0000280~nuclear division	29	2.207001522070015	0.0034280930532929422	KIF23, KIF22, HAUS5, NEK2, TUBB2A, HAUS1, CDC16, NCAPH, MC1R, INCENP, PBRM1, CLASP2, LMLN, CCNA2, ASPM, TUBB3, APC, KIF11, DLGAP5, KIF18A, CENPF, CDC20, PBK, SMC2, CDC25B, CCNB1, CCNB2, KIF20B, CIT, DSCC1	1003	220	13528	1.7779026556693556	0.999989448044515	0.27262352878142915	6.065065459919783
GOTERM_BP_FAT	GO:0007067~mitosis	29	2.207001522070015	0.0034280930532929422	KIF23, KIF22, HAUS5, NEK2, TUBB2A, HAUS1, CDC16, NCAPH, MC1R, INCENP, PBRM1, CLASP2, LMLN, CCNA2, ASPM, TUBB3, APC, KIF11, DLGAP5, KIF18A, CENPF, CDC20, PBK, SMC2, CDC25B, CCNB1, CCNB2, KIF20B, CIT, DSCC1	1003	220	13528	1.7779026556693556	0.999989448044515	0.27262352878142915	6.065065459919783
GOTERM_BP_FAT	GO:0019530~taurine metabolic process	4	0.30441400304414	0.003616543435687543	STAT5A, STAT5B, PHGDH, GHR	1003	5	13528	10.79002991026919	0.999994386191322	0.27874631766100777	6.388183782489487
GOTERM_BP_FAT	GO:0045647~negative regulation of erythrocyte differentiation	4	0.30441400304414	0.003616543435687543	MAFB, LDB1, STAT5A, STAT5B	1003	5	13528	10.79002991026919	0.999994386191322	0.27874631766100777	6.388183782489487
GOTERM_BP_FAT	GO:0006732~coenzyme metabolic process	22	1.67427701674277	0.004398471409200307	ME1, MOCOS, KYNU, HMGCR, SUCLG2, ACO1, ACLY, DLAT, MTHFD1, HAGH, PANK4, SDHB, AGPAT6, COQ2, NNT, BAAT, IDH1, LIPT2, ACSL6, DCXR, HMGCL, MDH1	1003	153	13528	1.9393844609960968	0.9999995912138916	0.32098170295406425	7.717694924632612
GOTERM_BP_FAT	GO:0030258~lipid modification	13	0.989345509893455	0.004403209475879386	SOAT1, PPARD, CPT2, PIK3CB, ECHS1, PPARGC1A, CPT1A, HADHA, ACOX3, SACM1L, MTMR1, HAO2, PIK3CA	1003	69	13528	2.541130232490933	0.999999597654473	0.31448752340476993	7.725696385224767
GOTERM_BP_FAT	GO:0000087~M phase of mitotic cell cycle	29	2.207001522070015	0.004421097518593854	KIF23, KIF22, HAUS5, NEK2, TUBB2A, HAUS1, CDC16, NCAPH, MC1R, INCENP, PBRM1, CLASP2, LMLN, CCNA2, ASPM, TUBB3, APC, KIF11, DLGAP5, KIF18A, CENPF, CDC20, PBK, SMC2, CDC25B, CCNB1, CCNB2, KIF20B, CIT, DSCC1	1003	224	13528	1.746154393960974	0.9999996210689351	0.3090223418570206	7.755899097574681
GOTERM_BP_FAT	GO:0043434~response to peptide hormone stimulus	22	1.67427701674277	0.004748228351541761	BSG, EGR2, ERBB3, STAT5A, STAT5B, RHOQ, NR4A3, STAT1, CPS1, VGF, LPIN1, ZFP106, EIF4EBP2, BCL2, SORT1, PCSK9, PTPN1, PARP1, PIK3R3, CCNA2, VLDLR, GHR	1003	154	13528	1.9267910554052128	0.9999998734432441	0.32116682733116775	8.306591623110382
GOTERM_BP_FAT	GO:0007242~intracellular signaling cascade	118	8.980213089802131	0.004837141047477966	ADCY2, STAT5A, STAT5B, ITPKB, PRKAR2B, MAP3K4, EIF4EBP2, MC1R, S1PR4, RALB, PIK3CA, TLK1, PRKACB, RAPGEF1, GNG5, CCNA2, GNG7, ADAM9, RAB27A, DFFA, PLXNB1, PIK3CB, DCDC5, DEPDC1, GEM, PPARGC1A, ASB9, RAB17, MAPK3, SDCBP, ERC1, WNT5A, RAB7A, ERBB3, PTPLAD1, BLK, SIPA1, AKAP11, CALR, ZAP70, EGF, RHEBL1, VAV3, MET, DUSP22, BRCA1, ATM, PTPN11, P2RX7, UACA, PLCG1, ARF3, CDC42BPA, TGFBR3, GRK5, TNK2, TR…	1003	1256	13528	1.2671412514050207	0.9999999060690106	0.3197227833575702	8.455729490326803
GOTERM_BP_FAT	GO:0030036~actin cytoskeleton organization	29	2.207001522070015	0.00500201875750854	SHROOM1, SHROOM4, WASF1, DIAPH3, RHOQ, CALR, DAAM2, CORO2B, NPHP4, PACSIN2, GSN, BCL2, GRID2IP, WIPF1, FMNL2, ARHGEF17, GAS7, WAS, LPIN1, CAPN3, EPB41L1, EPS8, LIMCH1, CDC42BPA, SDCBP, BIN3, ARAP1, PARVA, MYH10	1003	226	13528	1.7307017002091072	0.9999999459643876	0.32237010119165543	8.731680864254866
GOTERM_BP_FAT	GO:0006869~lipid transport	21	1.5981735159817352	0.005074547907456109	SOAT1, SLC27A1, ABCA7, PPARD, CPT2, LDLR, OSBPL9, PSAP, PCTP, APOLD1, ABCA4, P2RX7, STARD5, NPC2, OSBPL1A, ATP8B2, SCARB1, PLTP, ATP8B3, APOO, VLDLR	1003	145	13528	1.9533674837556299	0.9999999576322289	0.3201194334462272	8.852821795403653
GOTERM_BP_FAT	GO:0033059~cellular pigmentation	7	0.532724505327245	0.005496325776367798	BBS2, BBS5, MLPH, LYST, BCL2, ASIP, RAB27A	1003	23	13528	4.1049026832545845	0.9999999897072831	0.3354913060627138	9.554285215688186
GOTERM_BP_FAT	GO:0007243~protein kinase cascade	42	3.1963470319634704	0.006115063407976183	WNT5A, NRG3, ERBB3, PTPLAD1, STAT5A, BLK, STAT5B, ITPKB, AKAP11, MAP3K4, ZAP70, TNFRSF19, PIK3CA, PRKACB, EGF, SCG2, ADAM9, GHR, FYB, PIK3CB, MET, BIRC7, DUSP22, MAPK10, STAT1, IFNAR1, PTPN11, RPS6KA5, SH2D3C, DOK1, MAST1, P2RX7, CARD14, RPS6KA2, JAK1, TGFBR3, JAK3, FAF1, TRIP6, ERC1, MAP3K12, SMPD2	1003	370	13528	1.5310177575381962	0.9999999987099876	0.35915641547524013	10.57408826101055
GOTERM_BP_FAT	GO:0070085~glycosylation	19	1.445966514459665	0.006226392280201794	GALNT3, GNPTG, GYPC, GALNT2, ST6GAL1, MAN1A2, LDLR, ST8SIA1, TSPAN7, ST6GALNAC2, ST6GALNAC1, ST3GAL1, STT3B, ST6GALNAC3, ST3GAL5, LARGE, ST3GAL4, B3GNT7, DDOST	1003	128	13528	2.0020563310069788	0.9999999991123336	0.35818543339786957	10.756422946641598
GOTERM_BP_FAT	GO:0043413~biopolymer glycosylation	19	1.445966514459665	0.006226392280201794	GALNT3, GNPTG, GYPC, GALNT2, ST6GAL1, MAN1A2, LDLR, ST8SIA1, TSPAN7, ST6GALNAC2, ST6GALNAC1, ST3GAL1, STT3B, ST6GALNAC3, ST3GAL5, LARGE, ST3GAL4, B3GNT7, DDOST	1003	128	13528	2.0020563310069788	0.9999999991123336	0.35818543339786957	10.756422946641598
GOTERM_BP_FAT	GO:0006486~protein amino acid glycosylation	19	1.445966514459665	0.006226392280201794	GALNT3, GNPTG, GYPC, GALNT2, ST6GAL1, MAN1A2, LDLR, ST8SIA1, TSPAN7, ST6GALNAC2, ST6GALNAC1, ST3GAL1, STT3B, ST6GALNAC3, ST3GAL5, LARGE, ST3GAL4, B3GNT7, DDOST	1003	128	13528	2.0020563310069788	0.9999999991123336	0.35818543339786957	10.756422946641598
GOTERM_BP_FAT	GO:0015031~protein transport	76	5.78386605783866	0.006465432539523419	GNPTG, NPEPL1, RAB5B, MLPH, VPS54, ATP6AP1, SELENBP1, TGFB2, LONP2, ZFYVE16, RAB6B, STAM, VPS13A, TLK1, VPS11, AGAP1, RAB27A, KIF13B, SCAMP1, SNUPN, STXBP1, VPS41, PRKCB, RAB11FIP3, ATG4C, LCA5, STXBP5, LYST, RAB17, PSEN2, SIL1, SORT1, SDCBP, KPNA5, ERC1, LCP2, RAB7A, PPY, STON1, STX7, EXOC7, SNX6, LMF1, MTX1, AKAP12, CCDC91, CALR, UEVLD, GNPTAB, TAP1, SNX21, TMED10, PEX12, APPBP2, EXOC2, SCG2, F…	1003	762	13528	1.3452137027238493	0.9999999996022497	0.36297195659990034	11.146737163943932
GOTERM_BP_FAT	GO:0030029~actin filament-based process	30	2.28310502283105	0.006522615042606934	SHROOM1, SHROOM4, WASF1, DIAPH3, RHOQ, CALR, DAAM2, CORO2B, NPHP4, PACSIN2, GSN, BCL2, GRID2IP, WIPF1, FMNL2, MYO1E, ARHGEF17, GAS7, WAS, LPIN1, CAPN3, EPB41L1, EPS8, LIMCH1, CDC42BPA, SDCBP, BIN3, ARAP1, PARVA, MYH10	1003	241	13528	1.6789465628012228	0.9999999996717555	0.35959751032942666	11.239867544514981
GOTERM_BP_FAT	GO:0006084~acetyl-CoA metabolic process	8	0.60882800608828	0.006523223679473458	SDHB, KYNU, NNT, SUCLG2, ACO1, IDH1, DLAT, MDH1	1003	31	13528	3.4806548097642556	0.9999999996724258	0.353890399330301	11.240858305596868
GOTERM_BP_FAT	GO:0043603~cellular amide metabolic process	11	0.837138508371385	0.00742492115235043	ME1, KYNU, NAGS, STAT5A, MCCC1, STAT5B, IDH1, CPS1, DCXR, GHR, MDH1	1003	56	13528	2.6493377011821675	0.9999999999841745	0.3859232494306748	12.6972519334422
GOTERM_BP_FAT	GO:0045184~establishment of protein localization	76	5.78386605783866	0.008114414076217451	GNPTG, NPEPL1, RAB5B, MLPH, VPS54, ATP6AP1, SELENBP1, TGFB2, LONP2, ZFYVE16, RAB6B, STAM, VPS13A, TLK1, VPS11, AGAP1, RAB27A, KIF13B, SCAMP1, SNUPN, STXBP1, VPS41, PRKCB, RAB11FIP3, ATG4C, LCA5, STXBP5, LYST, RAB17, PSEN2, SIL1, SORT1, SDCBP, KPNA5, ERC1, LCP2, RAB7A, PPY, STON1, STX7, EXOC7, SNX6, LMF1, MTX1, AKAP12, CCDC91, CALR, UEVLD, GNPTAB, TAP1, SNX21, TMED10, PEX12, APPBP2, EXOC2, SCG2, F…	1003	769	13528	1.3329685844935932	0.999999999998443	0.4071720840893359	13.795629993157332
GOTERM_BP_FAT	GO:0048858~cell projection morphogenesis	30	2.28310502283105	0.008160005818543502	NRP2, BBS5, ONECUT1, ERBB3, CNP, TTC8, APP, ROBO1, BCL2, ROBO2, TOP2B, SPON2, APC, EGR2, STXBP1, RTN4R, DOCK7, NEUROG2, AFG3L2, NTN1, GAS7, PTPN11, BBS2, SEMA6A, EPHA4, NCAM2, S100B, UBB, IFT88, MYH10	1003	245	13528	1.6515351903473252	0.9999999999986644	0.4030250393464626	13.867796393463315
GOTERM_BP_FAT	GO:0032990~cell part morphogenesis	31	2.359208523592085	0.008288656694975697	NRP2, BBS5, ONECUT1, ERBB3, CNP, TTC8, FIS1, APP, ROBO1, BCL2, ROBO2, TOP2B, SPON2, APC, EGR2, STXBP1, RTN4R, DOCK7, NEUROG2, AFG3L2, NTN1, GAS7, PTPN11, BBS2, SEMA6A, EPHA4, NCAM2, S100B, UBB, IFT88, MYH10	1003	256	13528	1.633256480558325	0.9999999999991337	0.40210662740309744	14.071127935585881
GOTERM_BP_FAT	GO:0010469~regulation of receptor activity	6	0.45662100456621	0.008380266963076788	APP, SNX6, ZFYVE28, PSEN2, PCSK9, EGF	1003	18	13528	4.495845795945497	0.9999999999993635	0.39986228110901834	14.215640502410999
GOTERM_BP_FAT	GO:0007178~transmembrane receptor protein serine/threonine kinase signaling pathway	16	1.21765601217656	0.008691040500142126	AMHR2, FMOD, TGFBR2, BMPR2, DUSP22, FSTL1, STUB1, TGFB2, ZFYVE16, HIPK2, SPTBN1, TGFBR3, BAMBI, HPGD, ADAM9, TOB1	1003	103	13528	2.0951514388872217	0.9999999999997764	0.4055725078492184	14.704167427122838
GOTERM_BP_FAT	GO:0008610~lipid biosynthetic process	37	2.8158295281582952	0.009002991981838446	HSD3B2, CYB5R1, HMGCR, ST8SIA1, FDFT1, CDS2, PIGK, AGPAT6, STARD5, C1QTNF3, ST3GAL5, AGPS, DGKE, SCARB1, SCD5, PCYT2, ACSL3, ACAA2, PIGZ, SCD, AMACR, ACLY, ACACB, CERCAM, TECR, PNPLA3, BRCA1, DOLK, COQ2, P2RX7, SEMA6D, LARGE, PI4K2A, MBOAT1, PLA2G6, IDI1, GPAM, SMPD2	1003	323	13528	1.5450120227552637	0.9999999999999217	0.411075236361244	15.191900884280951
GOTERM_BP_FAT	GO:0006261~DNA-dependent DNA replication	11	0.837138508371385	0.009521107349496393	PRIM1, HMGB1, PNKP, DNA2, TOP1, CDC45, RFC1, TOP1MT, FEN1, PURA, REV3L	1003	58	13528	2.55798122872761	0.9999999999999863	0.4232904112813729	15.996150025801082
GOTERM_BP_FAT	GO:0008104~protein localization	85	6.468797564687975	0.009532784813888544	GNPTG, NPEPL1, RAB5B, CROCC, MLPH, VPS54, ATP6AP1, SELENBP1, MLH3, TGFB2, LONP2, VPS13C, ZFYVE16, TLK1, STAM, RAB6B, VPS13A, VPS11, AGAP1, COX18, RAB27A, KIF13B, SCAMP1, SNUPN, STXBP1, VPS41, PTPRU, PRKCB, BBS2, RAB11FIP3, ATG4C, LCA5, STXBP5, LYST, RAB17, PSEN2, SIL1, SORT1, SDCBP, KPNA5, BIN3, ERC1, GRASP, LCP2, RAB7A, PPY, STON1, STX7, EXOC7, SNX6, LMF1, MTX1, AKAP12, CCDC91, CALR, UEVLD, GNPT…	1003	882	13528	1.2998193627733579	0.9999999999999869	0.4182730977349004	16.01419313804152
GOTERM_BP_FAT	GO:0042493~response to drug	27	2.054794520547945	0.009608592131513933	SLC22A18, ERBB3, PGF, COMT, XRCC1, CDH3, HADHA, TOP1, BCL2, ENO2, APC, NAT8, GABRG3, NES, ATP4A, TGFBR2, CENPF, ATP1A1, STAT1, CPS1, RAD54L, CAPN3, HDAC4, P2RX7, GRK5, AACS, IGFBP2	1003	216	13528	1.6859421734795612	0.9999999999999898	0.41549026141613354	16.131235686782464
GOTERM_BP_FAT	GO:0033043~regulation of organelle organization	27	2.054794520547945	0.010174020452752857	NEK2, RHOQ, CDC16, ACTR3, ARPC3, GSN, TLK1, CLASP2, EGF, ARHGEF10L, APC, CCDC88A, DLGAP5, PIF1, PSRC1, CENPF, PPARGC1A, ATM, BRCA1, ARPC1B, PLK4, P2RX7, CAPG, KIF20B, SPTBN1, ARAP1, SPTAN1	1003	217	13528	1.6781728547077661	0.9999999999999984	0.42845929774873026	16.999377094385693
GOTERM_BP_FAT	GO:0032869~cellular response to insulin stimulus	12	0.91324200913242	0.010818629250896068	ZFP106, EIF4EBP2, ERBB3, PCSK9, RHOQ, PTPN1, PIK3R3, PARP1, STAT1, LPIN1, GHR, VLDLR	1003	68	13528	2.380153656677028	0.9999999999999998	0.4431499135316227	17.97872799337098
GOTERM_BP_FAT	GO:0006265~DNA topological change	4	0.30441400304414	0.011307210785535843	TOP1, TOP1MT, TOP2B, TOP2A	1003	7	13528	7.70716422162085	1.0	0.4524683612089224	18.71374045398204
GOTERM_BP_FAT	GO:0000279~M phase	37	2.8158295281582952	0.011835635413297359	KIF23, KIF22, HAUS5, NEK2, TUBB2A, HAUS1, MLH3, CDC16, MEI1, NCAPH, MC1R, INCENP, PBRM1, CLASP2, DYNC1H1, LMLN, CCNA2, TUBB3, ASPM, APC, EXO1, KIF11, DLGAP5, KIF18A, CENPF, CDC20, UBR2, PBK, SMC2, RAD54L, ATM, CDC25B, CCNB1, CCNB2, KIF20B, ZNF318, CIT, DSCC1	1003	329	13528	1.5168355117019763	1.0	0.46248493428375526	19.501682858226953
GOTERM_BP_FAT	GO:0051656~establishment of organelle localization	12	0.91324200913242	0.012035346794381944	BBS2, BBS5, DLGAP5, NLGN1, KIF18A, CENPF, TMED10, ASIP, NTN1, WIPI1, MYH10, RAB27A	1003	69	13528	2.3456586761454767	1.0	0.46292872789331585	19.797591661748537
GOTERM_BP_FAT	GO:0032400~melanosome localization	5	0.380517503805175	0.012450143205917367	BBS2, BBS5, MLPH, ASIP, RAB27A	1003	13	13528	5.187514379937112	1.0	0.4692362212681038	20.408906289175434
GOTERM_BP_FAT	GO:0009101~glycoprotein biosynthetic process	21	1.5981735159817352	0.012846391713270589	GALNT3, GNPTG, GYPC, GALNT2, ST6GAL1, MAN1A2, LDLR, ST8SIA1, TSPAN7, ST6GALNAC2, ST6GALNAC1, ST3GAL1, STT3B, ST6GALNAC3, ST3GAL5, LARGE, ST3GAL4, CHST9, B3GNT7, CHST11, DDOST	1003	158	13528	1.7926473743326983	1.0	0.4747979723387665	20.98877060615959
GOTERM_BP_FAT	GO:0009060~aerobic respiration	8	0.60882800608828	0.012890937050376177	UQCRC2, SDHB, NNT, SUCLG2, ACO1, IDH1, CAT, MDH1	1003	35	13528	3.0828656886483405	1.0	0.47097341320258446	21.053707367064657
GOTERM_BP_FAT	GO:0019748~secondary metabolic process	13	0.989345509893455	0.01299655313626109	ME1, SLC45A2, KYNU, DCT, RDH11, TYR, BCL2, IDH1, IDI1, ASIP, DCXR, OCA2, MDH1	1003	79	13528	2.219468177745245	1.0	0.4688249406823557	21.20746958869224
GOTERM_BP_FAT	GO:0016050~vesicle organization	10	0.76103500761035	0.013243837677429452	P2RX7, VAV3, PICALM, LYST, BCL2, ZFYVE16, STXBP1, SORT1, EEA1, ASIP	1003	52	13528	2.593757189968556	1.0	0.4703668656420449	21.566374806311984
GOTERM_BP_FAT	GO:0010975~regulation of neuron projection development	12	0.91324200913242	0.013353515052983852	ACTR3, LZTS1, YWHAH, PLXNB1, ROBO1, RTN4R, ROBO2, POU3F2, OMG, NTN1, MBP, SPP1	1003	70	13528	2.312149266486256	1.0	0.46838903417103694	21.725063847943073
GOTERM_BP_FAT	GO:0006754~ATP biosynthetic process	14	1.06544901065449	0.013665223189722294	ATP1B1, ATP4A, ATP1B2, ATP6AP1, ATP6V1H, ATP1A1, ATP6V0B, SLC25A13, ATP2B4, ATP6V1E1, ATP6V0A1, ATP8B2, ATP6V0A4, ATP8B3	1003	89	13528	2.1216350947158524	1.0	0.4714999446772782	22.174410351694863
GOTERM_BP_FAT	GO:0000904~cell morphogenesis involved in differentiation	29	2.207001522070015	0.013697252896089987	NRP2, ERBB3, CNP, TGFB2, DAB2, APP, ROBO1, BCL2, ROBO2, LAMB1, TOP2B, SPON2, APC, EGR2, STXBP1, RTN4R, DOCK7, NEUROG2, AFG3L2, NTN1, PTPN11, SEMA6A, EPHA4, NCAM2, S100B, TGFBR3, UBB, LAMC1, MYH10	1003	244	13528	1.6030269846199108	1.0	0.46765369110904365	22.220444766341263
GOTERM_BP_FAT	GO:0046903~secretion	34	2.5875190258751903	0.014421949843477645	AVPR2, PPY, SLC22A18, EXOC7, SRCIN1, LMF1, AQP5, AQP4, AQP6, VGF, AQP2, RIMS3, DAB2, GNPTAB, ROPN1B, TMED10, PCSK6, PCSK4, EXOC2, SCG2, RAB27A, SCAMP1, NOX5, NLGN1, STXBP1, ANXA2, P2RX7, STXBP5, PI4K2A, SYTL2, ATP6V0A4, IFT88, LCP2, MYH10	1003	300	13528	1.5285875706214689	1.0	0.4806032495686341	23.25515652242276
GOTERM_BP_FAT	GO:0016192~vesicle-mediated transport	58	4.41400304414003	0.014795084958242392	NPEPL1, LDLR, SRCIN1, VPS54, APP, DAB2, PICALM, PACSIN2, GSN, ZFYVE16, RAB6B, VPS13A, GOLGA4, RAB27A, GHR, SCAMP1, NCALD, STXBP1, ATP6V1H, VPS41, WAS, STXBP5, ARRB1, FNBP1L, LYST, PI4K2A, SORT1, ERC1, ABCA7, RAB7A, TMX1, STON1, STX7, EXOC7, EEA1, RIMS3, ROPN1B, OSBPL1A, DNER, TMED10, SCARB1, EXOC2, PCSK4, MICALL2, DNM3, VAV3, TGFBR2, NLGN1, WIPI1, CORO1C, P2RX7, ARF3, SYTL2, LRP8, MERTK, GGA2, MY…	1003	576	13528	1.3581200841918688	1.0	0.48480040558812576	23.782826304883777
GOTERM_BP_FAT	GO:0042981~regulation of apoptosis	77	5.859969558599695	0.015015591029257475	XRCC5, STAT5A, STAT5B, MITF, CBX4, PRDX3, MCF2L, TGFB2, KCNIP3, ARHGAP4, EDNRB, APP, PGP, HTRA2, CDKN2D, CHST11, PIK3CA, CAT, TOP2A, RAB27A, ADAM9, GHR, SGK3, DFFA, BCL2A1, ARHGEF17, ACTN3, IFI16, PRKCE, CARD14, BNIP2, LYST, HIPK2, PSEN2, SORT1, UBB, CTSB, TNFAIP3, MYO18A, FAIM2, PRODH, TMX1, HMGB1, ERBB3, CALR, ITM2B, FEM1B, TIMP3, BCL2, PLEKHG5, PCSK9, TNFRSF19, PCSK6, APC, SCG2, OBSCN, CARD8, …	1003	804	13528	1.2917168891335942	1.0	0.485367907825228	24.093041539068206
GOTERM_BP_FAT	GO:0051960~regulation of nervous system development	24	1.82648401826484	0.015044443220594513	XRCC5, TF, LZTS1, PLXNB1, NLGN1, RTN4R, CALR, NTN1, TTC3, MBP, ACTR3, YWHAH, C11ORF9, ROBO1, BCL2, ROBO2, POU3F2, UBB, CDK5RAP2, AGRN, EGF, OMG, ASPM, SPP1	1003	192	13528	1.6859421734795614	1.0	0.48156735973470344	24.1335433579287
GOTERM_BP_FAT	GO:0032868~response to insulin stimulus	15	1.141552511415525	0.01530929560498872	EGR2, ERBB3, RHOQ, VGF, STAT1, LPIN1, ZFP106, EIF4EBP2, PCSK9, SORT1, PTPN1, PARP1, PIK3R3, VLDLR, GHR	1003	100	13528	2.0231306081754736	1.0	0.48316331544276236	24.504381908695173
GOTERM_BP_FAT	GO:0046449~creatinine metabolic process	3	0.228310502283105	0.01563280965907981	STAT5A, STAT5B, GHR	1003	3	13528	13.487537387836491	1.0	0.4860111434995579	24.95503254894098
GOTERM_BP_FAT	GO:0007409~axonogenesis	24	1.82648401826484	0.015926522146047357	NRP2, EGR2, ERBB3, STXBP1, RTN4R, DOCK7, CNP, NEUROG2, AFG3L2, NTN1, PTPN11, SEMA6A, EPHA4, NCAM2, APP, S100B, ROBO1, BCL2, ROBO2, UBB, SPON2, TOP2B, MYH10, APC	1003	193	13528	1.6772067218035016	1.0	0.4881287644056801	25.36196705107652
GOTERM_BP_FAT	GO:0042440~pigment metabolic process	9	0.684931506849315	0.016303268274125232	DCT, SLC45A2, TYR, BCL2, IREB2, GPR143, IDI1, ASIP, OCA2	1003	45	13528	2.6975074775672985	1.0	0.4919572715848478	25.880890749568053
GOTERM_BP_FAT	GO:0051875~pigment granule localization	5	0.380517503805175	0.01642616576491983	BBS2, BBS5, MLPH, ASIP, RAB27A	1003	14	13528	4.816977638513032	1.0	0.49034224542106664	26.049428771491968
GOTERM_BP_FAT	GO:0019228~regulation of action potential in neuron	10	0.76103500761035	0.016782712522381477	P2RX4, P2RX7, PPARD, MPZ, EGR2, C11ORF9, POU3F2, AFG3L2, GJC3, MBP	1003	54	13528	2.4976921088586095	1.0	0.4936221327326724	26.53633923782316
GOTERM_BP_FAT	GO:0051648~vesicle localization	8	0.60882800608828	0.017359947188788243	BBS2, BBS5, MLPH, NLGN1, TMED10, ASIP, WIPI1, RAB27A	1003	37	13528	2.9162243000727543	1.0	0.5012752102508372	27.318209323315877
GOTERM_BP_FAT	GO:0044087~regulation of cellular component biogenesis	19	1.445966514459665	0.01740374397779551	HMGB1, PSRC1, STXBP1, RHOQ, ACTR3, ARPC1B, ARPC3, GSN, TPPP, CAPG, SPTBN1, UBB, FAF1, AGRN, KBTBD10, ARHGEF10L, ARAP1, APC, SPTAN1	1003	142	13528	1.8046704955555866	1.0	0.49805562316483254	27.377210380123994
GOTERM_BP_FAT	GO:0051186~cofactor metabolic process	24	1.82648401826484	0.017813066043892194	ME1, MOCOS, KYNU, HMGCR, SUCLG2, ACO1, IREB2, ACLY, DLAT, MTHFD1, HAGH, PANK4, SDHB, AGPAT6, COQ2, NNT, BAAT, MCCC1, IDH1, LIPT2, ACSL6, DCXR, HMGCL, MDH1	1003	195	13528	1.6600046015798757	1.0	0.5021311435843885	27.92644640898112
GOTERM_BP_FAT	GO:0051301~cell division	33	2.5114155251141552	0.018964680138476908	KIF23, HAUS5, NEK2, HAUS1, CDC16, TGFB2, TOP1, NCAPH, ROPN1B, INCENP, POU3F2, CLASP2, LMLN, CCNA2, CABLES1, ASPM, APC, KIF11, NOX5, PIK3CB, LIG1, CENPF, CDC20, SMC2, TACC1, CDC25B, CCNB1, PPP1CA, CCNB2, KIF20B, BIN3, CIT, MYH10	1003	295	13528	1.508775368808828	1.0	0.5202074431013723	29.450720592996007
GOTERM_BP_FAT	GO:0045664~regulation of neuron differentiation	18	1.36986301369863	0.018968649818144397	LZTS1, PLXNB1, NLGN1, RTN4R, CALR, NTN1, TTC3, MBP, ACTR3, YWHAH, ROBO1, BCL2, POU3F2, ROBO2, CDK5RAP2, OMG, ASPM, SPP1	1003	133	13528	1.8253809998575703	1.0	0.5162608254313696	29.455921765875036
GOTERM_BP_FAT	GO:0043067~regulation of programmed cell death	77	5.859969558599695	0.019397045373025786	XRCC5, STAT5A, STAT5B, MITF, CBX4, PRDX3, MCF2L, TGFB2, KCNIP3, ARHGAP4, EDNRB, APP, PGP, HTRA2, CDKN2D, CHST11, PIK3CA, CAT, TOP2A, RAB27A, ADAM9, GHR, SGK3, DFFA, BCL2A1, ARHGEF17, ACTN3, IFI16, PRKCE, CARD14, BNIP2, LYST, HIPK2, PSEN2, SORT1, UBB, CTSB, TNFAIP3, MYO18A, FAIM2, PRODH, TMX1, HMGB1, ERBB3, CALR, ITM2B, FEM1B, TIMP3, BCL2, PLEKHG5, PCSK9, TNFRSF19, PCSK6, APC, SCG2, OBSCN, CARD8, …	1003	812	13528	1.2789906143638052	1.0	0.5202193856158892	30.015091371276938
GOTERM_BP_FAT	GO:0009165~nucleotide biosynthetic process	23	1.750380517503805	0.01958150769500472	ME1, ADSS, ATP1B1, KYNU, ADCY2, ATP4A, ATP1B2, ATP6AP1, ATP6V1H, ATP1A1, PRPSAP1, ATP6V0B, MTHFD1, TYMS, ATP2B4, SLC25A13, ATP6V1E1, GUCY1A2, ATP8B2, ATP6V0A1, ATP6V0A4, PAPSS1, ATP8B3	1003	186	13528	1.667813763012039	1.0	0.5196505594563743	30.254571029987844
GOTERM_BP_FAT	GO:0006163~purine nucleotide metabolic process	23	1.750380517503805	0.01958150769500472	ADSS, ATP1B1, ADCY2, ATP4A, ATP1B2, ATP6AP1, RHOQ, ATP6V1H, ATP1A1, PDE4D, ACLY, ATP6V0B, MTHFD1, ATP2B4, SLC25A13, NUDT9, ATP6V1E1, GUCY1A2, ATP8B2, ATP6V0A1, PAPSS1, ATP6V0A4, ATP8B3	1003	186	13528	1.667813763012039	1.0	0.5196505594563743	30.254571029987844
GOTERM_BP_FAT	GO:0015980~energy derivation by oxidation of organic compounds	19	1.445966514459665	0.01982143913587386	UQCRC2, SUCLG2, ACO1, GYG2, CPS1, PPARGC1A, NDUFV3, SDHB, PPP1CA, NNT, SLC25A13, PPP1R3B, PYGL, GYS1, IDH1, NFATC4, CAT, AGL, MDH1	1003	144	13528	1.7796056275617589	1.0	0.5200911217689423	30.564905190567238
GOTERM_BP_FAT	GO:0010941~regulation of cell death	77	5.859969558599695	0.020837381867362004	XRCC5, STAT5A, STAT5B, MITF, CBX4, PRDX3, MCF2L, TGFB2, KCNIP3, ARHGAP4, EDNRB, APP, PGP, HTRA2, CDKN2D, CHST11, PIK3CA, CAT, TOP2A, RAB27A, ADAM9, GHR, SGK3, DFFA, BCL2A1, ARHGEF17, ACTN3, IFI16, PRKCE, CARD14, BNIP2, LYST, HIPK2, PSEN2, SORT1, UBB, CTSB, TNFAIP3, MYO18A, FAIM2, PRODH, TMX1, HMGB1, ERBB3, CALR, ITM2B, FEM1B, TIMP3, BCL2, PLEKHG5, PCSK9, TNFRSF19, PCSK6, APC, SCG2, OBSCN, CARD8, …	1003	815	13528	1.2742826734520365	1.0	0.5341044158552171	31.8645502338875
GOTERM_BP_FAT	GO:0006096~glycolysis	9	0.684931506849315	0.02088784435426464	GPI, UEVLD, PKLR, PGM1, ENO2, HK1, DLAT, OGDH, MDH1	1003	47	13528	2.582719925330392	1.0	0.531130201256119	31.92850122364328
GOTERM_BP_FAT	GO:0007176~regulation of epidermal growth factor receptor activity	5	0.380517503805175	0.021112851470833752	APP, SNX6, ZFYVE28, PSEN2, EGF	1003	15	13528	4.495845795945497	1.0	0.5311777088821585	32.21296242397994
GOTERM_BP_FAT	GO:0006259~DNA metabolic process	51	3.881278538812785	0.02189718180144512	XRCC5, KIF22, MLH3, XRCC1, PRIM1, TOP1, CDC45, NT5M, CDKN2D, PSIP1, FANCE, NSMCE2, TOP2B, TOP2A, CCDC88A, DFFA, USP1, LIG1, TOP1MT, RBBP7, PURA, PNKP, RFC1, SMARCAL1, DDB2, MYO18A, DSCC1, REV3L, HMGB1, TMX1, UBE2V2, TYMS, POLQ, EGF, FEN1, EXO1, BIRC7, CENPF, PPFIBP2, RAD54L, BRCA1, ATM, DNASE2, DNA2, ENDOG, SUPT16H, CUL4B, PARP1, NFIA, NFIB, DUT	1003	506	13528	1.3594158236752194	1.0	0.5405446952896632	33.195779257523014
GOTERM_BP_FAT	GO:0006887~exocytosis	16	1.21765601217656	0.02245146846408054	SCAMP1, EXOC7, SRCIN1, STXBP1, NLGN1, RIMS3, P2RX7, STXBP5, ROPN1B, PI4K2A, TMED10, SYTL2, EXOC2, PCSK4, MYH10, RAB27A	1003	115	13528	1.8765269409163814	1.0	0.5458449367431948	33.8821979595366
GOTERM_BP_FAT	GO:0046034~ATP metabolic process	15	1.141552511415525	0.02263024447889638	ATP1B1, ATP4A, ATP1B2, ATP6AP1, ATP6V1H, ATP1A1, ACLY, ATP6V0B, ATP2B4, SLC25A13, ATP6V1E1, ATP6V0A1, ATP8B2, ATP6V0A4, ATP8B3	1003	105	13528	1.9267910554052128	1.0	0.5450061599578385	34.10216551807472
GOTERM_BP_FAT	GO:0046148~pigment biosynthetic process	8	0.60882800608828	0.02282127557596824	DCT, SLC45A2, TYR, IREB2, GPR143, IDI1, ASIP, OCA2	1003	39	13528	2.7666743359664596	1.0	0.5443781291529215	34.33644735868084
GOTERM_BP_FAT	GO:0034440~lipid oxidation	8	0.60882800608828	0.02282127557596824	PPARD, CPT2, HAO2, ECHS1, PPARGC1A, HADHA, CPT1A, ACOX3	1003	39	13528	2.7666743359664596	1.0	0.5443781291529215	34.33644735868084
GOTERM_BP_FAT	GO:0019395~fatty acid oxidation	8	0.60882800608828	0.02282127557596824	PPARD, CPT2, HAO2, ECHS1, PPARGC1A, HADHA, CPT1A, ACOX3	1003	39	13528	2.7666743359664596	1.0	0.5443781291529215	34.33644735868084
GOTERM_BP_FAT	GO:0042058~regulation of epidermal growth factor receptor signaling pathway	6	0.45662100456621	0.024204874786969022	APP, SNX6, ZFYVE28, PSEN2, AFAP1L2, EGF	1003	23	13528	3.518488014218215	1.0	0.5621644040384948	36.00995393816135
GOTERM_BP_FAT	GO:0046356~acetyl-CoA catabolic process	6	0.45662100456621	0.024204874786969022	SDHB, NNT, SUCLG2, ACO1, IDH1, MDH1	1003	23	13528	3.518488014218215	1.0	0.5621644040384948	36.00995393816135
GOTERM_BP_FAT	GO:0006099~tricarboxylic acid cycle	6	0.45662100456621	0.024204874786969022	SDHB, NNT, SUCLG2, ACO1, IDH1, MDH1	1003	23	13528	3.518488014218215	1.0	0.5621644040384948	36.00995393816135
GOTERM_BP_FAT	GO:0015988~energy coupled proton transport, against electrochemical gradient	4	0.30441400304414	0.02426431030434462	ATP4A, ATP6V1E1, ATP6V1H, ATP6V0A4	1003	9	13528	5.994461061260662	1.0	0.5594297180132719	36.080932157299806
GOTERM_BP_FAT	GO:0006599~phosphagen metabolic process	4	0.30441400304414	0.02426431030434462	CKMT2, STAT5A, STAT5B, GHR	1003	9	13528	5.994461061260662	1.0	0.5594297180132719	36.080932157299806
GOTERM_BP_FAT	GO:0015991~ATP hydrolysis coupled proton transport	4	0.30441400304414	0.02426431030434462	ATP4A, ATP6V1E1, ATP6V1H, ATP6V0A4	1003	9	13528	5.994461061260662	1.0	0.5594297180132719	36.080932157299806
GOTERM_BP_FAT	GO:0006105~succinate metabolic process	4	0.30441400304414	0.02426431030434462	SDHB, STAT5A, STAT5B, GHR	1003	9	13528	5.994461061260662	1.0	0.5594297180132719	36.080932157299806
GOTERM_BP_FAT	GO:0006600~creatine metabolic process	4	0.30441400304414	0.02426431030434462	CKMT2, STAT5A, STAT5B, GHR	1003	9	13528	5.994461061260662	1.0	0.5594297180132719	36.080932157299806
GOTERM_BP_FAT	GO:0032402~melanosome transport	4	0.30441400304414	0.02426431030434462	BBS2, BBS5, ASIP, RAB27A	1003	9	13528	5.994461061260662	1.0	0.5594297180132719	36.080932157299806
GOTERM_BP_FAT	GO:0016044~membrane organization	40	3.0441400304414	0.024495777539711966	RAB7A, ABCA7, STON1, STX7, LDLR, VAPA, EEA1, ABCA4, APP, DAB2, PICALM, CRB1, PACSIN2, ROPN1B, DNER, BCL2, SCARB1, AGRN, COX18, ATP8B3, GHR, MICALL2, SCAMP1, DNM3, CCDC88A, VAV3, TGFBR2, STXBP1, ATP6V1H, CORO1C, PLSCR1, P2RX7, FNBP1L, ARRB1, SORT1, LRP8, MERTK, SYT17, VLDLR, MYH10	1003	381	13528	1.4160144239198416	1.0	0.5593076620465985	36.35664307498887
GOTERM_BP_FAT	GO:0030155~regulation of cell adhesion	18	1.36986301369863	0.024638742349187618	VAV3, SRCIN1, ONECUT1, ERBB3, PIK3CB, STAT5A, SIPA1, STAT5B, TGFB2, CD47, PGP, GSN, FBLN2, BCL2, FAF1, APC, SPP1, ADAM9	1003	137	13528	1.772085204241291	1.0	0.5578782005051351	36.52637290140541
GOTERM_BP_FAT	GO:0009205~purine ribonucleoside triphosphate metabolic process	16	1.21765601217656	0.025811443750108937	ATP1B1, ATP4A, ATP1B2, ATP6AP1, RHOQ, ATP6V1H, ATP1A1, ACLY, ATP6V0B, ATP2B4, SLC25A13, ATP6V1E1, ATP6V0A1, ATP8B2, ATP6V0A4, ATP8B3	1003	117	13528	1.844449557310973	1.0	0.571396199272378	37.90256279723664
GOTERM_BP_FAT	GO:0009100~glycoprotein metabolic process	24	1.82648401826484	0.025828141223701192	GALNT3, AGA, GNPTG, GYPC, GALNT2, ST6GAL1, MAN1A2, LDLR, ST8SIA1, TSPAN7, ST6GALNAC2, ST6GALNAC1, ST3GAL1, STT3B, ST6GALNAC3, LARGE, ST3GAL5, ST3GAL4, CHST9, B3GNT7, CHST11, PSEN2, PCSK6, DDOST	1003	202	13528	1.6024796896439395	1.0	0.5681279537105526	37.92195246406887
GOTERM_BP_FAT	GO:0007169~transmembrane receptor protein tyrosine kinase signaling pathway	26	1.97869101978691	0.025896183324622984	ERBB3, ATP6AP1, STAT5A, STAT5B, BMPR2, RHOQ, EIF4EBP2, AGRN, EGF, PIK3R3, SHC3, RAPGEF1, GHR, FIBP, NIN, MYO1E, MET, PTPN11, RPS6KA5, DOK1, EPHA4, ZFP106, EPS8, SORT1, PTPN1, LCP2	1003	224	13528	1.5655177325167353	1.0	0.5656259889366	38.00090608384507
GOTERM_BP_FAT	GO:0048812~neuron projection morphogenesis	25	1.9025875190258752	0.025899008006903534	NRP2, ERBB3, CNP, APP, ROBO1, BCL2, ROBO2, TOP2B, SPON2, APC, EGR2, STXBP1, RTN4R, NEUROG2, DOCK7, AFG3L2, NTN1, GAS7, PTPN11, SEMA6A, EPHA4, NCAM2, S100B, UBB, MYH10	1003	213	13528	1.5830442943470058	1.0	0.5622354737611813	38.00418169150791
GOTERM_BP_FAT	GO:0009150~purine ribonucleotide metabolic process	18	1.36986301369863	0.026237616478130915	ADSS, ATP1B1, ATP4A, ATP1B2, ATP6AP1, RHOQ, ATP6V1H, ATP1A1, ACLY, ATP6V0B, ATP2B4, SLC25A13, NUDT9, ATP6V1E1, ATP8B2, ATP6V0A1, ATP6V0A4, ATP8B3	1003	138	13528	1.7592440071091076	1.0	0.56360025672015	38.3956619961298
GOTERM_BP_FAT	GO:0009081~branched chain family amino acid metabolic process	5	0.380517503805175	0.02653854077096869	BCKDK, STAT5A, MCCC1, STAT5B, GHR	1003	16	13528	4.214855433698903	1.0	0.5644165476136801	38.74161204070431
GOTERM_BP_FAT	GO:0007009~plasma membrane organization	5	0.380517503805175	0.02653854077096869	PLSCR1, P2RX7, AGRN, SYT17, MYH10	1003	16	13528	4.214855433698903	1.0	0.5644165476136801	38.74161204070431
GOTERM_BP_FAT	GO:0051130~positive regulation of cellular component organization	22	1.67427701674277	0.026829034509575623	PLXNB1, ATP6AP1, DLGAP5, PSRC1, RHOQ, CALR, PPARGC1A, NTN1, TGFB2, ACTR3, PLK4, P2RX7, ROBO1, TPPP, PCSK9, ROBO2, FAF1, EGF, ARHGEF10L, ARAP1, APC, ADAM9	1003	181	13528	1.639369185261894	1.0	0.5650749575697624	39.073828466628356
GOTERM_BP_FAT	GO:0009199~ribonucleoside triphosphate metabolic process	16	1.21765601217656	0.027625444897624793	ATP1B1, ATP4A, ATP1B2, ATP6AP1, RHOQ, ATP6V1H, ATP1A1, ACLY, ATP6V0B, ATP2B4, SLC25A13, ATP6V1E1, ATP6V0A1, ATP8B2, ATP6V0A4, ATP8B3	1003	118	13528	1.8288186288591852	1.0	0.5725205574211522	39.975913151668195
GOTERM_BP_FAT	GO:0009206~purine ribonucleoside triphosphate biosynthetic process	14	1.06544901065449	0.028430788541902632	ATP1B1, ATP4A, ATP1B2, ATP6AP1, ATP6V1H, ATP1A1, ATP6V0B, SLC25A13, ATP2B4, ATP6V1E1, ATP6V0A1, ATP8B2, ATP6V0A4, ATP8B3	1003	98	13528	1.926791055405213	1.0	0.5798325845940354	40.87527004329523
GOTERM_BP_FAT	GO:0034654~nucleobase, nucleoside, nucleotide and nucleic acid biosynthetic process	23	1.750380517503805	0.028478740014669022	ME1, ADSS, ATP1B1, KYNU, ADCY2, ATP4A, ATP1B2, ATP6AP1, ATP6V1H, ATP1A1, PRPSAP1, ATP6V0B, MTHFD1, TYMS, ATP2B4, SLC25A13, ATP6V1E1, GUCY1A2, ATP8B2, ATP6V0A1, ATP6V0A4, PAPSS1, ATP8B3	1003	193	13528	1.6073231083950223	1.0	0.5771892490916348	40.92841546439479
GOTERM_BP_FAT	GO:0034404~nucleobase, nucleoside and nucleotide biosynthetic process	23	1.750380517503805	0.028478740014669022	ME1, ADSS, ATP1B1, KYNU, ADCY2, ATP4A, ATP1B2, ATP6AP1, ATP6V1H, ATP1A1, PRPSAP1, ATP6V0B, MTHFD1, TYMS, ATP2B4, SLC25A13, ATP6V1E1, GUCY1A2, ATP8B2, ATP6V0A1, ATP6V0A4, PAPSS1, ATP8B3	1003	193	13528	1.6073231083950223	1.0	0.5771892490916348	40.92841546439479
GOTERM_BP_FAT	GO:0042441~eye pigment metabolic process	3	0.228310502283105	0.029734509104688424	TYR, GPR143, OCA2	1003	4	13528	10.115653040877367	1.0	0.5899222357498708	42.30423871383794
GOTERM_BP_FAT	GO:0051593~response to folic acid	3	0.228310502283105	0.029734509104688424	GSN, BCL2, TIMP3	1003	4	13528	10.115653040877367	1.0	0.5899222357498708	42.30423871383794
GOTERM_BP_FAT	GO:0006726~eye pigment biosynthetic process	3	0.228310502283105	0.029734509104688424	TYR, GPR143, OCA2	1003	4	13528	10.115653040877367	1.0	0.5899222357498708	42.30423871383794
GOTERM_BP_FAT	GO:0048069~eye pigmentation	3	0.228310502283105	0.029734509104688424	TYR, GPR143, OCA2	1003	4	13528	10.115653040877367	1.0	0.5899222357498708	42.30423871383794
GOTERM_BP_FAT	GO:0006549~isoleucine metabolic process	3	0.228310502283105	0.029734509104688424	STAT5A, STAT5B, GHR	1003	4	13528	10.115653040877367	1.0	0.5899222357498708	42.30423871383794
GOTERM_BP_FAT	GO:0000255~allantoin metabolic process	3	0.228310502283105	0.029734509104688424	STAT5A, STAT5B, GHR	1003	4	13528	10.115653040877367	1.0	0.5899222357498708	42.30423871383794
GOTERM_BP_FAT	GO:0034637~cellular carbohydrate biosynthetic process	11	0.837138508371385	0.02991964779476544	GPI, PYGL, PGM1, ENO2, GYS1, GYG2, CERCAM, PPARGC1A, AGL, PMM1, G6PC3	1003	69	13528	2.15018711980002	1.0	0.5890053477250925	42.50449684997396
GOTERM_BP_FAT	GO:0060284~regulation of cell development	24	1.82648401826484	0.030008206232111444	XRCC5, LZTS1, PLXNB1, NLGN1, RTN4R, CALR, NTN1, TTC3, MBP, TGFB2, ACTR3, HDAC4, YWHAH, ROBO1, BCL2, TGFBR3, ROBO2, POU3F2, UBB, CDK5RAP2, AGRN, OMG, ASPM, SPP1	1003	205	13528	1.5790287673564674	1.0	0.5869110077101006	42.60005501600599
GOTERM_BP_FAT	GO:0016052~carbohydrate catabolic process	15	1.141552511415525	0.03015967789500708	HK1, CHI3L2, DLAT, CPS1, OGDH, GNS, GPI, UEVLD, CHID1, PYGL, PKLR, PGM1, ENO2, GALE, MDH1	1003	109	13528	1.8560831267664892	1.0	0.5856164658754347	42.763151277031554
GOTERM_BP_FAT	GO:0009145~purine nucleoside triphosphate biosynthetic process	14	1.06544901065449	0.03059800492331208	ATP1B1, ATP4A, ATP1B2, ATP6AP1, ATP6V1H, ATP1A1, ATP6V0B, SLC25A13, ATP2B4, ATP6V1E1, ATP6V0A1, ATP8B2, ATP6V0A4, ATP8B3	1003	99	13528	1.9073285194920289	1.0	0.5878331740439424	43.23265341644398
GOTERM_BP_FAT	GO:0009201~ribonucleoside triphosphate biosynthetic process	14	1.06544901065449	0.03059800492331208	ATP1B1, ATP4A, ATP1B2, ATP6AP1, ATP6V1H, ATP1A1, ATP6V0B, SLC25A13, ATP2B4, ATP6V1E1, ATP6V0A1, ATP8B2, ATP6V0A4, ATP8B3	1003	99	13528	1.9073285194920289	1.0	0.5878331740439424	43.23265341644398
GOTERM_BP_FAT	GO:0015914~phospholipid transport	7	0.532724505327245	0.032121737137251825	ABCA7, P2RX7, NPC2, PCTP, ATP8B2, ABCA4, ATP8B3	1003	33	13528	2.8609927792380434	1.0	0.602794521067822	44.83659663251846
GOTERM_BP_FAT	GO:0051650~establishment of vesicle localization	7	0.532724505327245	0.032121737137251825	BBS2, BBS5, NLGN1, TMED10, ASIP, WIPI1, RAB27A	1003	33	13528	2.8609927792380434	1.0	0.602794521067822	44.83659663251846
GOTERM_BP_FAT	GO:0009141~nucleoside triphosphate metabolic process	17	1.2937595129375952	0.03260567752987296	ATP1B1, ATP4A, ATP1B2, ATP6AP1, RHOQ, ATP6V1H, ATP1A1, ACLY, ATP6V0B, ATP2B4, SLC25A13, ATP6V1E1, ATP6V0A1, ATP8B2, ATP6V0A4, ATP8B3, DUT	1003	131	13528	1.7502911113986284	1.0	0.6052755165948427	45.33698427268848
GOTERM_BP_FAT	GO:0006107~oxaloacetate metabolic process	4	0.30441400304414	0.03278887025545907	STAT5A, STAT5B, GHR, MDH1	1003	10	13528	5.395014955134595	1.0	0.6042954206942753	45.52528124630749
GOTERM_BP_FAT	GO:0051904~pigment granule transport	4	0.30441400304414	0.03278887025545907	BBS2, BBS5, ASIP, RAB27A	1003	10	13528	5.395014955134595	1.0	0.6042954206942753	45.52528124630749
GOTERM_BP_FAT	GO:0032401~establishment of melanosome localization	4	0.30441400304414	0.03278887025545907	BBS2, BBS5, ASIP, RAB27A	1003	10	13528	5.395014955134595	1.0	0.6042954206942753	45.52528124630749
GOTERM_BP_FAT	GO:0008366~axon ensheathment	8	0.60882800608828	0.03306694682162031	PPARD, MPZ, EGR2, C11ORF9, POU3F2, AFG3L2, GJC3, MBP	1003	42	13528	2.5690547405402837	1.0	0.6044015262522517	45.809934659337934
GOTERM_BP_FAT	GO:0007272~ensheathment of neurons	8	0.60882800608828	0.03306694682162031	PPARD, MPZ, EGR2, C11ORF9, POU3F2, AFG3L2, GJC3, MBP	1003	42	13528	2.5690547405402837	1.0	0.6044015262522517	45.809934659337934
GOTERM_BP_FAT	GO:0006090~pyruvate metabolic process	8	0.60882800608828	0.03306694682162031	GPI, BSG, SLC16A7, PGM1, ENO2, DLAT, PPARGC1A, G6PC3	1003	42	13528	2.5690547405402837	1.0	0.6044015262522517	45.809934659337934
GOTERM_BP_FAT	GO:0032940~secretion by cell	24	1.82648401826484	0.03306709585807308	SCAMP1, PPY, NOX5, SRCIN1, EXOC7, LMF1, NLGN1, STXBP1, VGF, RIMS3, P2RX7, GNPTAB, STXBP5, ROPN1B, PI4K2A, TMED10, SYTL2, PCSK6, PCSK4, EXOC2, MYH10, RAB27A, LCP2, SCG2	1003	207	13528	1.563772450763651	1.0	0.6013846963092073	45.810086843065015
GOTERM_BP_FAT	GO:0043254~regulation of protein complex assembly	13	0.989345509893455	0.03321308548414234	HMGB1, PSRC1, STXBP1, ACTR3, ARPC1B, ARPC3, GSN, TPPP, CAPG, SPTBN1, FAF1, APC, SPTAN1	1003	90	13528	1.9481998449097153	1.0	0.6000345997035137	45.9589655725665
GOTERM_BP_FAT	GO:0040018~positive regulation of multicellular organism growth	6	0.45662100456621	0.03383254353130441	BCL2, STAT5A, STAT5B, POU3F2, GPAM, GHR	1003	25	13528	3.237008973080758	1.0	0.6039582859337367	46.58639310645592
GOTERM_BP_FAT	GO:0005976~polysaccharide metabolic process	15	1.141552511415525	0.034545364173460366	CHI3L2, GYG2, CERCAM, CPS1, GNS, PPP1CA, PPP1R3B, CHID1, XYLT1, PYGL, CHST9, CHST11, GYS1, AGL, CLN6	1003	111	13528	1.8226401875454716	1.0	0.6087971038350102	47.29986395154025
GOTERM_BP_FAT	GO:0009144~purine nucleoside triphosphate metabolic process	16	1.21765601217656	0.03583283117796352	ATP1B1, ATP4A, ATP1B2, ATP6AP1, RHOQ, ATP6V1H, ATP1A1, ACLY, ATP6V0B, ATP2B4, SLC25A13, ATP6V1E1, ATP6V0A1, ATP8B2, ATP6V0A4, ATP8B3	1003	122	13528	1.7688573623392116	1.0	0.6195579299113066	48.5657360226909
GOTERM_BP_FAT	GO:0043549~regulation of kinase activity	37	2.8158295281582952	0.03610236969900426	CDK5R2, ADCY2, SNX6, HMGCR, PTPLAD1, PRDX3, TRIB2, TGFB2, PRKAR2B, APP, MAP3K4, DGKE, HEXIM1, CDKN2D, PRKACB, EGF, ADAM9, GHR, APC, CCDC88A, VAV3, RBL2, PIK3CB, RBL1, MET, TGFBR2, BIRC7, DUSP22, CISH, CDC25B, PTPN11, CARD14, P2RX7, ZFYVE28, PSEN2, LRP8, VLDLR	1003	357	13528	1.3978680205880956	1.0	0.6194578237930514	48.82708994602288
GOTERM_BP_FAT	GO:0006897~endocytosis	25	1.9025875190258752	0.036118301487363454	ABCA7, RAB7A, STON1, LDLR, EEA1, APP, DAB2, PICALM, PACSIN2, DNER, SCARB1, GHR, SCAMP1, MICALL2, DNM3, TGFBR2, STXBP1, ATP6V1H, CORO1C, P2RX7, FNBP1L, SORT1, LRP8, MERTK, VLDLR	1003	220	13528	1.5326747031632375	1.0	0.6167397662763503	48.842498608596166
GOTERM_BP_FAT	GO:0010324~membrane invagination	25	1.9025875190258752	0.036118301487363454	ABCA7, RAB7A, STON1, LDLR, EEA1, APP, DAB2, PICALM, PACSIN2, DNER, SCARB1, GHR, SCAMP1, MICALL2, DNM3, TGFBR2, STXBP1, ATP6V1H, CORO1C, P2RX7, FNBP1L, SORT1, LRP8, MERTK, VLDLR	1003	220	13528	1.5326747031632375	1.0	0.6167397662763503	48.842498608596166
GOTERM_BP_FAT	GO:0009755~hormone-mediated signaling	9	0.684931506849315	0.036188882708471634	PRKAR2B, ADCY2, GNG10, PRKACB, ASIP, GNG5, GNG7, GHR, PTPN11	1003	52	13528	2.3343814709717003	1.0	0.6146105618371964	48.910709540554606
GOTERM_BP_FAT	GO:0048667~cell morphogenesis involved in neuron differentiation	24	1.82648401826484	0.03635451594101202	NRP2, EGR2, ERBB3, STXBP1, RTN4R, DOCK7, CNP, NEUROG2, AFG3L2, NTN1, PTPN11, SEMA6A, EPHA4, NCAM2, APP, S100B, ROBO1, BCL2, ROBO2, UBB, SPON2, TOP2B, MYH10, APC	1003	209	13528	1.5488081210912719	1.0	0.613482449491195	49.07044301813377
GOTERM_BP_FAT	GO:0043648~dicarboxylic acid metabolic process	7	0.532724505327245	0.03664832826875441	ME1, SDHB, KYNU, STAT5A, STAT5B, GHR, MDH1	1003	34	13528	2.7768459327898656	1.0	0.6136801348740011	49.352629313261744
GOTERM_BP_FAT	GO:0009142~nucleoside triphosphate biosynthetic process	14	1.06544901065449	0.03781543710369478	ATP1B1, ATP4A, ATP1B2, ATP6AP1, ATP6V1H, ATP1A1, ATP6V0B, SLC25A13, ATP2B4, ATP6V1E1, ATP6V0A1, ATP8B2, ATP6V0A4, ATP8B3	1003	102	13528	1.8512306218599104	1.0	0.6226304128745104	50.45902955795558
GOTERM_BP_FAT	GO:0007018~microtubule-based movement	15	1.141552511415525	0.03937356529101413	KIF14, KIF23, KIF22, KIF3B, KIF11, TUBB2A, KIF18A, KIF3C, APP, MC1R, KIF20B, DYNC1H1, KIF21B, TUBB3, KIF13B, KIF2A	1003	113	13528	1.790381069181835	1.0	0.6350029875818586	51.90054012105423
GOTERM_BP_FAT	GO:0006687~glycosphingolipid metabolic process	6	0.45662100456621	0.039420212003174485	ST3GAL5, LARGE, PSAP, CREM, ST8SIA1, CLN6	1003	26	13528	3.112508627962267	1.0	0.6326918017607591	51.9430782277736
GOTERM_BP_FAT	GO:0009109~coenzyme catabolic process	6	0.45662100456621	0.039420212003174485	SDHB, NNT, SUCLG2, ACO1, IDH1, MDH1	1003	26	13528	3.112508627962267	1.0	0.6326918017607591	51.9430782277736
GOTERM_BP_FAT	GO:0060491~regulation of cell projection assembly	5	0.380517503805175	0.03967818255309505	ACTR3, RHOQ, KBTBD10, ARAP1, APC	1003	18	13528	3.746538163287914	1.0	0.6324053025803849	52.17768564020804
GOTERM_BP_FAT	GO:0045646~regulation of erythrocyte differentiation	5	0.380517503805175	0.03967818255309505	ETS1, MAFB, LDB1, STAT5A, STAT5B	1003	18	13528	3.746538163287914	1.0	0.6324053025803849	52.17768564020804
GOTERM_BP_FAT	GO:0051338~regulation of transferase activity	38	2.89193302891933	0.040045479436684045	CDK5R2, ADCY2, SNX6, HMGCR, PTPLAD1, PRDX3, TRIB2, TGFB2, PRKAR2B, APP, MAP3K4, DGKE, HEXIM1, CDKN2D, PRKACB, EGF, GHR, ADAM9, APC, CCDC88A, VAV3, RBL2, PIK3CB, PIF1, RBL1, MET, TGFBR2, BIRC7, DUSP22, CISH, CDC25B, PTPN11, CARD14, P2RX7, ZFYVE28, PSEN2, LRP8, VLDLR	1003	372	13528	1.3777591955316844	1.0	0.6331499570460775	52.50985110130459
GOTERM_BP_FAT	GO:0019637~organophosphate metabolic process	23	1.750380517503805	0.040151890257014766	PIGZ, PIK3CB, GALT, PIP5K1A, FDFT1, SACM1L, CDS2, PIGK, AGPAT6, PLCG1, DGKE, SEMA6D, SMPDL3B, PI4K2A, MBOAT1, PIK3CA, PLA2G6, PCSK9, PLCD1, PCYT2, PIP4K2A, GPAM, SMPD2	1003	200	13528	1.5510667996011964	1.0	0.6314513618411561	52.60567574885193
GOTERM_BP_FAT	GO:0046165~alcohol biosynthetic process	8	0.60882800608828	0.04137376000579733	GPI, PYGL, PGM1, ENO2, PPARGC1A, PMM1, G6PC3, DOLK	1003	44	13528	2.4522795250611797	1.0	0.6400359734906452	53.6929731554892
GOTERM_BP_FAT	GO:0006818~hydrogen transport	10	0.76103500761035	0.041473240248379915	NNT, ATP4A, SLC23A2, ATP6AP1, ATP6V1E1, ATP6V1H, ATP6V0A1, ATP6V1G1, ATP6V0A4, ATP6V0B	1003	63	13528	2.1408789504502366	1.0	0.6382825500417836	53.78045127542743
GOTERM_BP_FAT	GO:0005977~glycogen metabolic process	7	0.532724505327245	0.04156365058988973	PPP1CA, PPP1R3B, PYGL, GYS1, GYG2, CPS1, AGL	1003	35	13528	2.697507477567298	1.0	0.6364639186936524	53.859818267832914
GOTERM_BP_FAT	GO:0030031~cell projection assembly	12	0.91324200913242	0.04191563837218136	DNM3, BBS2, P2RX7, BBS5, CCDC88A, VAV3, ONECUT1, CAPG, SDCBP, MTSS1L, TTC8, MYH10	1003	83	13528	1.950005405470336	1.0	0.6370149119715076	54.167586588920024
GOTERM_BP_FAT	GO:0006644~phospholipid metabolic process	22	1.67427701674277	0.042315576443558	PIGZ, PIK3CB, PIP5K1A, FDFT1, SACM1L, CDS2, PIGK, AGPAT6, PLCG1, DGKE, SEMA6D, SMPDL3B, PI4K2A, MBOAT1, PLA2G6, PCSK9, PIK3CA, PLCD1, PCYT2, PIP4K2A, GPAM, SMPD2	1003	190	13528	1.5617148554336988	1.0	0.6379846717677067	54.51492637871335
GOTERM_BP_FAT	GO:0030041~actin filament polymerization	4	0.30441400304414	0.0426570983609011	GSN, WASF1, GAS7, WAS	1003	11	13528	4.9045590501223595	1.0	0.6384252983525226	54.80956190691187
GOTERM_BP_FAT	GO:0051905~establishment of pigment granule localization	4	0.30441400304414	0.0426570983609011	BBS2, BBS5, ASIP, RAB27A	1003	11	13528	4.9045590501223595	1.0	0.6384252983525226	54.80956190691187
GOTERM_BP_FAT	GO:0033865~nucleoside bisphosphate metabolic process	4	0.30441400304414	0.0426570983609011	PANK4, HMGCR, ACLY, PAPSS1	1003	11	13528	4.9045590501223595	1.0	0.6384252983525226	54.80956190691187
GOTERM_BP_FAT	GO:0051493~regulation of cytoskeleton organization	17	1.2937595129375952	0.043817266053898296	CCDC88A, PSRC1, RHOQ, BRCA1, ACTR3, ARPC1B, PLK4, P2RX7, ARPC3, GSN, CAPG, SPTBN1, CLASP2, ARHGEF10L, ARAP1, APC, SPTAN1	1003	136	13528	1.6859421734795614	1.0	0.6459518573207828	55.797039697060924
GOTERM_BP_FAT	GO:0009259~ribonucleotide metabolic process	18	1.36986301369863	0.0443098020042579	ADSS, ATP1B1, ATP4A, ATP1B2, ATP6AP1, RHOQ, ATP6V1H, ATP1A1, ACLY, ATP6V0B, ATP2B4, SLC25A13, NUDT9, ATP6V1E1, ATP8B2, ATP6V0A1, ATP6V0A4, ATP8B3	1003	147	13528	1.6515351903473254	1.0	0.6476108392252122	56.210064714788246
GOTERM_BP_FAT	GO:0033554~cellular response to stress	54	4.10958904109589	0.045070924238684924	XRCC5, KIF22, MLH3, PRDX3, XRCC1, AQP2, MAP3K4, XYLT1, CDKN2D, FANCE, NSMCE2, TLK1, CAT, CCNA2, TOP2A, USP1, LIG1, IFI16, SH2D3C, PNKP, ATG4C, RFC1, HIPK2, DDB2, MCTS1, MAP3K12, REV3L, WNT5A, HMGB1, PTPLAD1, BMPR2, ST8SIA1, UBE2V2, TYMS, BCL2, TNFRSF19, PCSK9, POLQ, FEN1, APC, SREBF1, EXO1, BIRC7, MAPK10, RAD54L, BRCA1, ATM, PTPN11, ATF6, DNA2, UACA, SUPT16H, CUL4B, PARP1	1003	566	13528	1.2867968532564849	1.0	0.6514889462432545	56.84115163675383
GOTERM_BP_FAT	GO:0033077~T cell differentiation in the thymus	6	0.45662100456621	0.04553620374354191	BCL2, STAT5A, STAT5B, ZAP70, ITPKB, APC	1003	27	13528	2.9972305306303317	1.0	0.6528429661646238	57.222695704525606
GOTERM_BP_FAT	GO:0040008~regulation of growth	35	2.663622526636225	0.046249064958456834	TMX1, NRG3, STAT5A, SIPA1, FGFRL1, STAT5B, VGF, TGFB2, AGPAT6, DAB2, APP, HTRA2, CDKN2D, BCL2, RASGRP2, PIK3CA, POU3F2, AGRN, GHR, SPP1, TMEM97, TGFBR2, PSRC1, TKT, AFG3L2, NTN1, CISH, PTPN11, BBS2, TMEM8B, UBB, PARP1, IGFBP2, MCTS1, GPAM	1003	341	13528	1.3843513447926017	1.0	0.6561933231482964	57.801086629785516
GOTERM_BP_FAT	GO:0022610~biological adhesion	65	4.946727549467275	0.04632829215909863	NRP2, PPARD, AEBP1, CD96, CD47, APP, ROBO1, ROBO2, SPON2, COL11A2, CEACAM1, ADAM9, TYRO3, NRXN2, PIK3CB, STXBP1, ACTN3, PTPRU, CERCAM, SSPN, SIRPA, NCAM2, SIGLEC1, LSAMP, CPXM1, GPR56, LAMC1, ADAM12, CHL1, PARVB, PARVA, LIMS1, PLXNC1, PPFIA1, PCDHGC5, CDH3, CDH5, SIGLEC9, NPHP4, ROPN1B, BCL2, COL6A1, SCARB1, GPNMB, LAMB1, LMLN, SELPLG, SPP1, APC, FLRT2, ADAM23, NLGN1, COL15A1, MCAM, ITGA9, COL19A…	1003	701	13528	1.250627575191686	1.0	0.6543645410515979	57.864910484084085
GOTERM_BP_FAT	GO:0007155~cell adhesion	65	4.946727549467275	0.04642322923124567	NRP2, PPARD, AEBP1, CD96, CD47, APP, ROBO1, ROBO2, SPON2, COL11A2, CEACAM1, ADAM9, TYRO3, NRXN2, PIK3CB, STXBP1, ACTN3, PTPRU, CERCAM, SSPN, SIRPA, NCAM2, SIGLEC1, LSAMP, CPXM1, GPR56, LAMC1, ADAM12, CHL1, PARVB, PARVA, LIMS1, PLXNC1, PPFIA1, PCDHGC5, CDH3, CDH5, SIGLEC9, NPHP4, ROPN1B, BCL2, COL6A1, SCARB1, GPNMB, LAMB1, LMLN, SELPLG, SPP1, APC, FLRT2, ADAM23, NLGN1, COL15A1, MCAM, ITGA9, COL19A…	1003	700	13528	1.2524141860133884	1.0	0.6526779804176551	57.941269736868016
GOTERM_BP_FAT	GO:0006164~purine nucleotide biosynthetic process	18	1.36986301369863	0.0467607895766651	ADSS, ATP1B1, ADCY2, ATP4A, ATP1B2, ATP6AP1, ATP6V1H, ATP1A1, ATP6V0B, MTHFD1, ATP2B4, SLC25A13, ATP6V1E1, GUCY1A2, ATP6V0A1, ATP8B2, ATP6V0A4, ATP8B3	1003	148	13528	1.6403761687909246	1.0	0.6529630442045853	58.21171648019742
GOTERM_BP_FAT	GO:0006073~cellular glucan metabolic process	7	0.532724505327245	0.04687489199038999	PPP1CA, PPP1R3B, PYGL, GYS1, GYG2, CPS1, AGL	1003	36	13528	2.6225767143015397	1.0	0.6514555057607976	58.30276081942206
GOTERM_BP_FAT	GO:0009062~fatty acid catabolic process	7	0.532724505327245	0.04687489199038999	PPARD, CPT2, HAO2, ECHS1, HADHA, CPT1A, ACOX3	1003	36	13528	2.6225767143015397	1.0	0.6514555057607976	58.30276081942206
GOTERM_BP_FAT	GO:0044042~glucan metabolic process	7	0.532724505327245	0.04687489199038999	PPP1CA, PPP1R3B, PYGL, GYS1, GYG2, CPS1, AGL	1003	36	13528	2.6225767143015397	1.0	0.6514555057607976	58.30276081942206
GOTERM_BP_FAT	GO:0051642~centrosome localization	3	0.228310502283105	0.04714648621594759	SEMA6A, NIN, ASPM	1003	5	13528	8.092522432701895	1.0	0.6512208508088444	58.51871705684258
GOTERM_BP_FAT	GO:0006573~valine metabolic process	3	0.228310502283105	0.04714648621594759	STAT5A, STAT5B, GHR	1003	5	13528	8.092522432701895	1.0	0.6512208508088444	58.51871705684258
GOTERM_BP_FAT	GO:0008154~actin polymerization or depolymerization	5	0.380517503805175	0.04740775610099824	GSN, WASF1, WIPF1, GAS7, WAS	1003	19	13528	3.5493519441674977	1.0	0.6509077276495512	58.7254660539318
GOTERM_BP_FAT	GO:0044275~cellular carbohydrate catabolic process	12	0.91324200913242	0.048541511370644726	GPI, UEVLD, PYGL, PKLR, PGM1, ENO2, HK1, GALE, DLAT, CPS1, OGDH, MDH1	1003	85	13528	1.9041229253416223	1.0	0.6574260948541554	59.611403095057746
GOTERM_BP_FAT	GO:0006665~sphingolipid metabolic process	11	0.837138508371385	0.04917772266174706	P2RX7, SMPDL3B, ST3GAL5, LARGE, PSAP, CREM, ST8SIA1, ASAH1, SMPD2, CLN6, GBA	1003	75	13528	1.9781721502160183	1.0	0.6599657980887417	60.100646282895895
GOTERM_BP_FAT	GO:0009152~purine ribonucleotide biosynthetic process	15	1.141552511415525	0.050434489692449055	ADSS, ATP1B1, ATP4A, ATP1B2, ATP6AP1, ATP6V1H, ATP1A1, ATP6V0B, ATP2B4, SLC25A13, ATP6V1E1, ATP6V0A1, ATP8B2, ATP6V0A4, ATP8B3	1003	117	13528	1.729171459979037	1.0	0.6671125367381079	61.05067997044187
GOTERM_BP_FAT	GO:0018108~peptidyl-tyrosine phosphorylation	8	0.60882800608828	0.05092751304732896	ERBB3, STAT5A, ZAP70, JAK1, JAK3, EGF, STAT1, GHR	1003	46	13528	2.3456586761454767	1.0	0.6684437374003165	61.41750172299118
GOTERM_BP_FAT	GO:0006635~fatty acid beta-oxidation	6	0.45662100456621	0.05218565560253551	PPARD, CPT2, ECHS1, HADHA, CPT1A, ACOX3	1003	28	13528	2.8901865831078193	1.0	0.6753005087235706	62.33885044553442
GOTERM_BP_FAT	GO:0031345~negative regulation of cell projection organization	6	0.45662100456621	0.05218565560253551	YWHAH, RTN4R, OMG, NTN1, MBP, SPP1	1003	28	13528	2.8901865831078193	1.0	0.6753005087235706	62.33885044553442
GOTERM_BP_FAT	GO:0016051~carbohydrate biosynthetic process	14	1.06544901065449	0.052397277492443856	GYG2, CERCAM, PPARGC1A, G6PC3, PMM1, GPI, XYLT1, PYGL, CHST9, CHST11, PGM1, GYS1, ENO2, AGL	1003	107	13528	1.764724518034681	1.0	0.6745290247680076	62.491765138333086
GOTERM_BP_FAT	GO:0046364~monosaccharide biosynthetic process	7	0.532724505327245	0.05258746195306628	GPI, PYGL, PGM1, ENO2, PPARGC1A, PMM1, G6PC3	1003	37	13528	2.5516962625636603	1.0	0.6736126243156302	62.628688658874324
GOTERM_BP_FAT	GO:0044242~cellular lipid catabolic process	11	0.837138508371385	0.05304242754558441	PPARD, CPT2, PLCG1, SMPDL3B, HAO2, ECHS1, CPS1, PNPLA3, HADHA, CPT1A, ACOX3	1003	76	13528	1.9521435692921236	1.0	0.6745847061748969	62.95432737981738
GOTERM_BP_FAT	GO:0051056~regulation of small GTPase mediated signal transduction	27	2.054794520547945	0.053554300420016805	SIPA1, ASAP2, RABGAP1L, ITPKB, ASAP3, MCF2L, PLEKHG1, TBC1D14, RASGRP2, PLEKHG5, TBC1D5, AGAP1, RAPGEF1, ARHGEF10L, RASA2, TBC1D2, OBSCN, VAV3, SIPA1L2, TRIO, ARHGEF17, DOCK7, PSD2, TBCK, USP6NL, SPATA13, ARAP1	1003	252	13528	1.4450932915539096	1.0	0.6759426840686336	63.31749074634602
GOTERM_BP_FAT	GO:0045851~pH reduction	4	0.30441400304414	0.053826862148313614	ATP4A, SLC12A5, ATP6V1H, CLN6	1003	12	13528	4.495845795945496	1.0	0.6756151178501324	63.50949228205182
GOTERM_BP_FAT	GO:0014068~positive regulation of phosphoinositide 3-kinase cascade	4	0.30441400304414	0.053826862148313614	PPARD, ERBB3, CAT, TGFB2	1003	12	13528	4.495845795945496	1.0	0.6756151178501324	63.50949228205182
GOTERM_BP_FAT	GO:0008299~isoprenoid biosynthetic process	5	0.380517503805175	0.0559085203993806	COQ2, HMGCR, IDI1, DOLK, FDFT1	1003	20	13528	3.3718843469591224	1.0	0.6876232807401953	64.9448657952894
GOTERM_BP_FAT	GO:0031346~positive regulation of cell projection organization	8	0.60882800608828	0.05618445506900292	ACTR3, PLXNB1, ROBO1, RHOQ, ROBO2, NTN1, ARAP1, APC	1003	47	13528	2.2957510447381257	1.0	0.6872691536200575	65.13107634684252
GOTERM_BP_FAT	GO:0050770~regulation of axonogenesis	9	0.684931506849315	0.05766429594434811	PLXNB1, ROBO1, RTN4R, ROBO2, POU3F2, OMG, NTN1, MBP, SPP1	1003	57	13528	2.129611166500499	1.0	0.6948057838002757	66.1138796187786
GOTERM_BP_FAT	GO:0044271~nitrogen compound biosynthetic process	33	2.5114155251141552	0.06001033735201737	ME1, MOCOS, ADSS, KYNU, ATP1B1, ADCY2, NAGS, ATP1B2, ATP6AP1, ATP6V0B, TGFB2, MTHFD1, TYMS, PADI6, ATP2B4, GUCY1A2, ATP8B2, PAPSS1, ATP8B3, ATP4A, IREB2, ATP6V1H, ATP1A1, PRPSAP1, CPS1, P2RX4, SLC25A13, ATP6V1E1, PHGDH, ATP6V0A1, ATP6V0A4, ADC, PRODH	1003	325	13528	1.3695037963033976	1.0	0.7074897225195769	67.61847971539103
GOTERM_BP_FAT	GO:0010721~negative regulation of cell development	8	0.60882800608828	0.06176592269848665	YWHAH, RTN4R, TGFBR3, OMG, NTN1, TTC3, MBP, SPP1	1003	48	13528	2.247922897972748	1.0	0.7160321757106003	68.70285530322391
GOTERM_BP_FAT	GO:0018212~peptidyl-tyrosine modification	8	0.60882800608828	0.06176592269848665	ERBB3, STAT5A, ZAP70, JAK1, JAK3, EGF, STAT1, GHR	1003	48	13528	2.247922897972748	1.0	0.7160321757106003	68.70285530322391
GOTERM_BP_FAT	GO:0042127~regulation of cell proliferation	71	5.403348554033485	0.0619496929922611	RARRES3, PPARD, PGF, STAT5A, ATP6AP1, E2F7, STAT5B, FGFRL1, MITF, JAG1, PRDX3, TENC1, TGFB2, EDNRB, CD47, CDKN2D, CHST11, ASPH, HSF4, CCNA2, CTBP2, CCDC88A, TNFRSF14, PTPRU, PURA, EIF2AK1, ADAMTS8, TCFL5, ZMIZ1, HIPK2, DHPS, LAMC1, MCTS1, ERBB3, BMPR2, ST8SIA1, COMT, CALR, CDH5, BCL2, ZAP70, POU3F2, GPNMB, LAMB1, EGF, APC, SCG2, THPO, NOX4, PDF, TGFBR2, CTLA4, DUSP22, ROGDI, SPARC, TRIM24, STAT1,…	1003	787	13528	1.2167918100843593	1.0	0.7150194187041685	68.81435908246016
GOTERM_BP_FAT	GO:0031175~neuron projection development	27	2.054794520547945	0.062399122625025644	NRP2, ERBB3, CNP, APP, ROBO1, BCL2, ROBO2, LAMB1, TOP2B, SPON2, APC, EGR2, STXBP1, RTN4R, NEUROG2, DOCK7, AFG3L2, NTN1, GAS7, PTPN11, SEMA6A, EPHA4, NCAM2, S100B, PHGDH, UBB, MYH10	1003	256	13528	1.4225137088733797	1.0	0.7155918709324741	69.08547353311398
GOTERM_BP_FAT	GO:0001508~regulation of action potential	10	0.76103500761035	0.06246099965976089	P2RX4, P2RX7, PPARD, MPZ, EGR2, C11ORF9, POU3F2, AFG3L2, GJC3, MBP	1003	68	13528	1.9834613805641899	1.0	0.7138717883792279	69.12262537473222
GOTERM_BP_FAT	GO:0032271~regulation of protein polymerization	10	0.76103500761035	0.06246099965976089	ACTR3, ARPC1B, ARPC3, GSN, TPPP, CAPG, PSRC1, SPTBN1, SPTAN1, APC	1003	68	13528	1.9834613805641899	1.0	0.7138717883792279	69.12262537473222
GOTERM_BP_FAT	GO:0016197~endosome transport	9	0.684931506849315	0.06275407729990817	LYST, ZFYVE16, VPS54, SORT1, VPS13A, EEA1, ERC1, WAS, WIPI1	1003	58	13528	2.0928937325953174	1.0	0.7135275735187878	69.2980207785798
GOTERM_BP_FAT	GO:0006007~glucose catabolic process	9	0.684931506849315	0.06275407729990817	GPI, UEVLD, PKLR, PGM1, ENO2, HK1, DLAT, OGDH, MDH1	1003	58	13528	2.0928937325953174	1.0	0.7135275735187878	69.2980207785798
GOTERM_BP_FAT	GO:0007588~excretion	9	0.684931506849315	0.06275407729990817	AVPR2, DAB2, SLC22A18, AQP5, AQP4, AQP6, ATP6V0A4, IFT88, AQP2	1003	58	13528	2.0928937325953174	1.0	0.7135275735187878	69.2980207785798
GOTERM_BP_FAT	GO:0042692~muscle cell differentiation	15	1.141552511415525	0.06347842558807637	LGALS1, MYEF2, JAG1, SOX6, AFG3L2, CAPN3, APP, CDON, DNER, SEMA4C, SORT1, AGRN, ADAM12, MYH10, SNTA1	1003	121	13528	1.6720087670871682	1.0	0.715708727589101	69.72748383442837
GOTERM_BP_FAT	GO:0018210~peptidyl-threonine modification	5	0.380517503805175	0.06517053170148163	GALNT3, GALNT2, BCL2, TGFBR2, MAP3K12	1003	21	13528	3.211318425675355	1.0	0.7233640834290546	70.70870888500677
GOTERM_BP_FAT	GO:0043029~T cell homeostasis	5	0.380517503805175	0.06517053170148163	P2RX7, CCNB2, BCL2, STAT5A, STAT5B	1003	21	13528	3.211318425675355	1.0	0.7233640834290546	70.70870888500677
GOTERM_BP_FAT	GO:0050767~regulation of neurogenesis	19	1.445966514459665	0.06605778236766	XRCC5, LZTS1, PLXNB1, NLGN1, RTN4R, CALR, NTN1, TTC3, MBP, ACTR3, YWHAH, ROBO1, BCL2, POU3F2, ROBO2, CDK5RAP2, OMG, ASPM, SPP1	1003	166	13528	1.5437542793306824	1.0	0.7263089486671137	71.21112109558175
GOTERM_BP_FAT	GO:0014066~regulation of phosphoinositide 3-kinase cascade	4	0.30441400304414	0.06623987783084663	PPARD, ERBB3, CAT, TGFB2	1003	13	13528	4.150011503949689	1.0	0.7253096872942104	71.31322161989435
GOTERM_BP_FAT	GO:0007566~embryo implantation	6	0.45662100456621	0.06708921510386892	PPARD, BSG, TGFBR2, LAMB1, IL11RA, SPP1	1003	30	13528	2.6975074775672985	1.0	0.7279887590684202	71.78493894761355
GOTERM_BP_FAT	GO:0019320~hexose catabolic process	10	0.76103500761035	0.06734220243928209	GPI, UEVLD, PKLR, PGM1, ENO2, HK1, GALE, DLAT, OGDH, MDH1	1003	69	13528	1.9547155634545639	1.0	0.7273850161982505	71.92402351766549
GOTERM_BP_FAT	GO:0021700~developmental maturation	13	0.989345509893455	0.0695746519181725	SOX10, PPARD, STXBP1, CDH5, TGFB2, CDC25B, CCNB1, APP, AGPAT6, PSEN2, GDF11, AGRN, PCSK4	1003	101	13528	1.7360196637809344	1.0	0.7373421220191473	73.12357883262897
GOTERM_BP_FAT	GO:0046907~intracellular transport	60	4.5662100456621	0.06964937206500856	GNPTG, NPEPL1, CPT2, MLPH, VPS54, ATP6AP1, TGFB2, APP, LONP2, ZFYVE16, SLC25A1, STAM, RAB6B, VPS13A, TLK1, RAB27A, KIF13B, SCAMP1, SNUPN, VPS41, WAS, NPC2, ATG4C, ARRB1, LYST, SIL1, SORT1, SDCBP, KPNA5, ERC1, TMX1, STON1, STX7, SNX6, MTX1, AKAP12, DSCR3, EEA1, CALR, BCL2, TMED10, PCSK9, WIPF1, PEX12, APPBP2, FYB, KIF3B, MYO1E, NLGN1, WIPI1, YWHAH, SLC25A13, PTTG1IP, YWHAQ, SPTBN1, SYTL2, SSR4, GG…	1003	657	13528	1.231738574231643	1.0	0.7357863914740324	73.16287773049639
GOTERM_BP_FAT	GO:0032268~regulation of cellular protein metabolic process	45	3.4246575342465753	0.07118325217455772	EIF4E3, A2M, CPEB2, MASP1, PTPLAD1, BMPR2, IGF2BP3, CPEB1, CDC16, FEM1B, CALR, TIMP3, STUB1, YBX2, ZFP36L1, PRKAR2B, EDNRB, APP, EIF4EBP2, BCL2, PCSK9, EGF, ADAM9, GHR, CCDC88A, ACO1, IREB2, BIRC7, DOCK7, CDC20, TNFRSF14, PRKCE, PPARGC1A, BRCA1, CCNB1, HDAC4, EIF4G3, CARD14, P2RX7, EIF2AK1, PSEN2, TNK2, UBB, IFT88, CLN6	1003	474	13528	1.2804624102376414	1.0	0.741778764151444	73.95771804303325
GOTERM_BP_FAT	GO:0022403~cell cycle phase	40	3.0441400304414	0.07129285070535846	KIF23, KIF22, HAUS5, NEK2, TUBB2A, HAUS1, MLH3, CDC16, MEI1, APP, NCAPH, MC1R, CDKN2D, INCENP, BCL2, PBRM1, CLASP2, DYNC1H1, LMLN, CCNA2, TUBB3, ASPM, APC, EXO1, KIF11, DLGAP5, KIF18A, CENPF, CDC20, UBR2, PBK, SMC2, RAD54L, ATM, CDC25B, CCNB1, CCNB2, KIF20B, ZNF318, CIT, DSCC1	1003	414	13528	1.303143708969709	1.0	0.7404203804509374	74.01365071608312
GOTERM_BP_FAT	GO:0042060~wound healing	21	1.5981735159817352	0.0732654489806287	PPARD, ERBB3, PIK3CB, EFEMP2, TGFBR2, STXBP1, CDH3, TIMP3, WAS, TGFB2, CCNB1, PLSCR1, HMCN1, GSN, CD59, DSP, SCARB1, SYT17, PROS1, MYH10, RAB27A	1003	191	13528	1.482922958872075	1.0	0.7484023229201463	75.00114450296222
GOTERM_BP_FAT	GO:0007179~transforming growth factor beta receptor signaling pathway	9	0.684931506849315	0.07374933328321008	AMHR2, FMOD, TGFBR2, TGFBR3, DUSP22, BAMBI, HPGD, ADAM9, TGFB2	1003	60	13528	2.0231306081754736	1.0	0.7488953909348202	75.23790432408653
GOTERM_BP_FAT	GO:0009260~ribonucleotide biosynthetic process	15	1.141552511415525	0.07462598568752035	ADSS, ATP1B1, ATP4A, ATP1B2, ATP6AP1, ATP6V1H, ATP1A1, ATP6V0B, ATP2B4, SLC25A13, ATP6V1E1, ATP6V0A1, ATP8B2, ATP6V0A4, ATP8B3	1003	124	13528	1.6315569420769949	1.0	0.7512841950827555	75.66145357427709
GOTERM_BP_FAT	GO:0006917~induction of apoptosis	32	2.43531202435312	0.0749335652266123	FEM1B, ITM2B, TIMP3, MCF2L, ARHGAP4, APP, HTRA2, PLEKHG5, TNFRSF19, PCSK9, RAB27A, OBSCN, VAV3, NOX5, DFFA, TRIO, ARHGEF17, IFI16, PRKCE, STAT1, BRCA1, ATM, UACA, ETS1, LYST, HIPK2, BNIP3L, PSEN2, SORT1, UBB, PRODH, SMPD2	1003	320	13528	1.3487537387836488	1.0	0.7509087174833428	75.80842921545029
GOTERM_BP_FAT	GO:0009306~protein secretion	6	0.45662100456621	0.07533766276463227	PPY, NOX5, GNPTAB, LMF1, LCP2, SCG2	1003	31	13528	2.6104911073231922	1.0	0.7509989134031899	76.0002509020913
GOTERM_BP_FAT	GO:0019319~hexose biosynthetic process	6	0.45662100456621	0.07533766276463227	GPI, PGM1, ENO2, PPARGC1A, PMM1, G6PC3	1003	31	13528	2.6104911073231922	1.0	0.7509989134031899	76.0002509020913
GOTERM_BP_FAT	GO:0006664~glycolipid metabolic process	6	0.45662100456621	0.07533766276463227	ST3GAL5, LARGE, PSAP, CREM, ST8SIA1, CLN6	1003	31	13528	2.6104911073231922	1.0	0.7509989134031899	76.0002509020913
GOTERM_BP_FAT	GO:0051187~cofactor catabolic process	6	0.45662100456621	0.07533766276463227	SDHB, NNT, SUCLG2, ACO1, IDH1, MDH1	1003	31	13528	2.6104911073231922	1.0	0.7509989134031899	76.0002509020913
GOTERM_BP_FAT	GO:0007059~chromosome segregation	11	0.837138508371385	0.07534754182107684	NCAPH, NEK2, HJURP, DLGAP5, INCENP, KIF18A, CENPF, TOP2A, SMC2, BRCA1, DSCC1	1003	81	13528	1.8316408798296469	1.0	0.7492078028227509	76.004922355996
GOTERM_BP_FAT	GO:0046164~alcohol catabolic process	11	0.837138508371385	0.07534754182107684	GPI, UEVLD, PKLR, PGM1, ENO2, HK1, GALE, DLAT, COMT, OGDH, MDH1	1003	81	13528	1.8316408798296469	1.0	0.7492078028227509	76.004922355996
GOTERM_BP_FAT	GO:0006643~membrane lipid metabolic process	11	0.837138508371385	0.07534754182107684	P2RX7, SMPDL3B, ST3GAL5, LARGE, PSAP, CREM, ST8SIA1, ASAH1, SMPD2, CLN6, GBA	1003	81	13528	1.8316408798296469	1.0	0.7492078028227509	76.004922355996
GOTERM_BP_FAT	GO:0009628~response to abiotic stimulus	36	2.73972602739726	0.07585981258054768	HMGCR, TRPV2, ST8SIA1, ABCA4, VGF, TIMP3, AQP2, APP, NPHP4, MC1R, XYLT1, CDKN2D, BCL2, CAT, FEN1, TUBB3, NES, USP1, TGFBR2, STAT1, SNAI2, RAD54L, BRCA1, ATM, OPN5, PNKP, P2RX7, UACA, ARRB1, HSPB7, ARSA, HSPB2, DDB2, CIRBP, IGFBP2, CLOCK, SMPD2	1003	368	13528	1.3194330053318308	1.0	0.7498223181564583	76.24598274093962
GOTERM_BP_FAT	GO:0012502~induction of programmed cell death	32	2.43531202435312	0.07736836185184459	FEM1B, ITM2B, TIMP3, MCF2L, ARHGAP4, APP, HTRA2, PLEKHG5, TNFRSF19, PCSK9, RAB27A, OBSCN, VAV3, NOX5, DFFA, TRIO, ARHGEF17, IFI16, PRKCE, STAT1, BRCA1, ATM, UACA, ETS1, LYST, HIPK2, BNIP3L, PSEN2, SORT1, UBB, PRODH, SMPD2	1003	321	13528	1.3445520137407092	1.0	0.7550919615703234	76.94263930552017
GOTERM_BP_FAT	GO:0046365~monosaccharide catabolic process	10	0.76103500761035	0.07780404075385114	GPI, UEVLD, PKLR, PGM1, ENO2, HK1, GALE, DLAT, OGDH, MDH1	1003	71	13528	1.8996531532164072	1.0	0.755307787744387	77.14021611221526
GOTERM_BP_FAT	GO:0032844~regulation of homeostatic process	14	1.06544901065449	0.07863642333550308	TF, MAFB, PIF1, LDB1, STAT5A, STAT5B, P2RX4, P2RX7, C11ORF9, ETS1, BCL2, CACNA1G, IFI6, SPP1	1003	114	13528	1.656364240611499	1.0	0.757334996477941	77.51325415542804
GOTERM_BP_FAT	GO:0042325~regulation of phosphorylation	44	3.34855403348554	0.07870260096504926	CDK5R2, ADCY2, SNX6, HMGCR, PTPLAD1, BMPR2, PRDX3, TRIB2, TGFB2, PRKAR2B, EDNRB, APP, MAP3K4, DGKE, HEXIM1, CDKN2D, BCL2, PRKACB, EGF, APC, ADAM9, GHR, CCDC88A, VAV3, RBL2, PIK3CB, RBL1, MET, TGFBR2, BIRC7, DUSP22, DOCK7, TNFRSF14, PRKCE, CISH, PTPN11, CDC25B, CARD14, P2RX7, ZFYVE28, PSEN2, LRP8, TNK2, VLDLR	1003	466	13528	1.2735013842592393	1.0	0.7558590477013523	77.5426638990652
GOTERM_BP_FAT	GO:0015992~proton transport	9	0.684931506849315	0.07965673624370978	NNT, ATP4A, ATP6AP1, ATP6V1E1, ATP6V1H, ATP6V0A1, ATP6V1G1, ATP6V0A4, ATP6V0B	1003	61	13528	1.9899645326316133	1.0	0.7584093917228104	77.96266767141671
GOTERM_BP_FAT	GO:0035265~organ growth	4	0.30441400304414	0.07982543566582458	BCL2, TGFBR3, TGFB2, PTPN11	1003	14	13528	3.853582110810425	1.0	0.7574104248041849	78.03615128686786
GOTERM_BP_FAT	GO:0006268~DNA unwinding during replication	4	0.30441400304414	0.07982543566582458	HMGB1, TOP1, TOP1MT, PURA	1003	14	13528	3.853582110810425	1.0	0.7574104248041849	78.03615128686786
GOTERM_BP_FAT	GO:0001775~cell activation	29	2.207001522070015	0.0814751378711925	TMX1, ONECUT1, STAT5A, STAT5B, ITPKB, BCL2, ZAP70, DDOST, ADAM9, RAB27A, APC, KIF13B, EXO1, PIK3CB, TGFBR2, APOLD1, STXBP1, SLAMF1, WAS, IFNAR1, HDAC4, PLSCR1, P2RX4, P2RX7, PKNOX1, PI4K2A, PSEN2, IRF4, LCP2	1003	287	13528	1.3628522099207605	1.0	0.7629751710355799	78.74264151319134
GOTERM_BP_FAT	GO:0055114~oxidation reduction	58	4.41400304414003	0.08259258394732112	UQCRC2, CYB5R1, D2HGDH, KCNAB2, HMGCR, PRDX3, OGDH, ACOX3, FDFT1, MTHFD1, TYR, PLOD2, MICAL1, CAT, SCD5, ASPH, HPD, NDUFB11, PCYOX1L, CTBP2, LEPREL2, MICAL2, TECR, PPARGC1A, VAT1, SCCPDH, ALDH7A1, NNT, CYP27A1, HAO2, MDH1, PRODH, ME1, HSD3B2, TMX1, HSD17B14, TMX4, HADHA, UEVLD, IDH1, BDH1, PCSK4, NOX4, NOX5, PYROXD2, SCD, TET1, MSRB2, SOD3, NDUFV3, RDH11, SDHB, SLC25A13, SUMF1, ALDH2, PHGDH, HPGD…	1003	639	13528	1.2242209209616846	1.0	0.7660939267650402	79.20893027942657
GOTERM_BP_FAT	GO:0042110~T cell activation	15	1.141552511415525	0.08272500798344949	STAT5A, STAT5B, ITPKB, WAS, IFNAR1, P2RX7, PKNOX1, BCL2, PSEN2, ZAP70, IRF4, DDOST, RAB27A, APC, KIF13B	1003	126	13528	1.6056592128376774	1.0	0.7649496772323734	79.2635431189485
GOTERM_BP_FAT	GO:0007015~actin filament organization	10	0.76103500761035	0.0833862425461892	SHROOM1, SHROOM4, GSN, BCL2, WASF1, BIN3, WIPF1, GAS7, WAS, ARAP1	1003	72	13528	1.873269081643957	1.0	0.7660734020337928	79.5342193686254
GOTERM_BP_FAT	GO:0016477~cell migration	28	2.13089802130898	0.08367630272863084	NRP2, PPARD, HMGCR, TGFB2, EDNRB, ROBO1, DNER, SCARB1, POU3F2, CLASP2, TOP2B, SELPLG, CEACAM1, APC, SCG2, CCDC88A, VAV3, PLXNB1, MDGA1, MET, NEUROG2, NTN1, LYST, SDCBP, TGFBR3, LRP8, LAMC1, MYH10	1003	276	13528	1.3683008944181947	1.0	0.76561138325924	79.65189870003788
GOTERM_BP_FAT	GO:0007034~vacuolar transport	6	0.45662100456621	0.08410853768827131	GNPTG, ATG4C, ZFYVE16, PCSK9, SORT1, DSCR3	1003	32	13528	2.528913260219342	1.0	0.7657548477714351	79.82607334812086
GOTERM_BP_FAT	GO:0051297~centrosome organization	6	0.45662100456621	0.08410853768827131	HAUS5, KIF11, NEK2, CROCC, HAUS1, BRCA1	1003	32	13528	2.528913260219342	1.0	0.7657548477714351	79.82607334812086
GOTERM_BP_FAT	GO:0051900~regulation of mitochondrial depolarization	3	0.228310502283105	0.08969988709258336	P2RX7, BCL2, IFI6	1003	7	13528	5.780373166215639	1.0	0.7866664758965946	81.9558929532274
GOTERM_BP_FAT	GO:0051489~regulation of filopodium assembly	3	0.228310502283105	0.08969988709258336	ACTR3, RHOQ, ARAP1	1003	7	13528	5.780373166215639	1.0	0.7866664758965946	81.9558929532274
GOTERM_BP_FAT	GO:0051491~positive regulation of filopodium assembly	3	0.228310502283105	0.08969988709258336	ACTR3, RHOQ, ARAP1	1003	7	13528	5.780373166215639	1.0	0.7866664758965946	81.9558929532274
GOTERM_BP_FAT	GO:0006886~intracellular protein transport	36	2.73972602739726	0.08983294395572405	GNPTG, NPEPL1, STON1, STX7, SNX6, MLPH, ATP6AP1, MTX1, AKAP12, CALR, TGFB2, LONP2, ZFYVE16, TLK1, STAM, APPBP2, PEX12, KIF13B, RAB27A, FYB, SNUPN, NLGN1, VPS41, YWHAH, ATG4C, YWHAQ, PTTG1IP, SORT1, SDCBP, SPTBN1, SIL1, KPNA5, SYTL2, SSR4, GGA2, TOB1	1003	374	13528	1.2982656309147425	1.0	0.7855581419242881	82.00388780074435
GOTERM_BP_FAT	GO:0034613~cellular protein localization	39	2.968036529680365	0.09214131504650733	GNPTG, NPEPL1, STON1, STX7, SNX6, MLPH, ATP6AP1, MTX1, AKAP12, CALR, TGFB2, LONP2, ZFYVE16, TLK1, STAM, APPBP2, PEX12, COX18, KIF13B, RAB27A, FYB, SNUPN, NLGN1, VPS41, PTPRU, BBS2, YWHAH, ATG4C, YWHAQ, PTTG1IP, SDCBP, SORT1, SPTBN1, SIL1, KPNA5, SYTL2, SSR4, GGA2, TOB1	1003	411	13528	1.2798393141742657	1.0	0.7926905652513413	82.81757806641268
GOTERM_BP_FAT	GO:0009991~response to extracellular stimulus	23	1.750380517503805	0.09220120858219755	SREBF1, A2M, KYNU, NES, TGFBR2, BMPR2, CPS1, STAT1, PPARGC1A, TIMP3, AQP2, P2RX7, ATG4C, GSN, CDKN2D, BCL2, ARSA, PCSK9, IGFBP2, AACS, SPP1, VLDLR, GHR	1003	220	13528	1.4100607269101786	1.0	0.7913240927646377	82.83822009728486
GOTERM_BP_FAT	GO:0060249~anatomical structure homeostasis	13	0.989345509893455	0.0923731288298485	XRCC5, FGGY, VPS54, ACP5, P2RX4, P2RX7, RFC1, LARGE, TPP1, BCL2, PARP1, COL11A2, APC	1003	106	13528	1.6541319437912676	1.0	0.7903794443745005	82.89734150475864
GOTERM_BP_FAT	GO:0031667~response to nutrient levels	21	1.5981735159817352	0.09326217991344685	SREBF1, A2M, KYNU, NES, TGFBR2, BMPR2, CPS1, STAT1, PPARGC1A, TIMP3, ATG4C, GSN, CDKN2D, BCL2, ARSA, PCSK9, AACS, IGFBP2, SPP1, VLDLR, GHR	1003	197	13528	1.4377577926120118	1.0	0.7920935532694603	83.20001694455961
GOTERM_BP_FAT	GO:0001893~maternal placenta development	4	0.30441400304414	0.09450358171383713	PPARD, BSG, PRDX3, SPP1	1003	15	13528	3.5966766367563974	1.0	0.7950576208618736	83.61418899646681
GOTERM_BP_FAT	GO:0045444~fat cell differentiation	8	0.60882800608828	0.09457231054871294	BBS2, CTBP2, SLC2A4, BBS9, TRIM32, TTC8, AACS, PPARGC1A	1003	53	13528	2.0358547000507907	1.0	0.7937538321124209	83.63683488718482
GOTERM_BP_FAT	GO:0010001~glial cell differentiation	8	0.60882800608828	0.09457231054871294	SOX10, EGR2, C11ORF9, ERBB3, GSN, DNER, PHGDH, POU3F2	1003	53	13528	2.0358547000507907	1.0	0.7937538321124209	83.63683488718482
GOTERM_BP_FAT	GO:0030162~regulation of proteolysis	8	0.60882800608828	0.09457231054871294	A2M, SERPINE2, MASP1, TIMP3, STUB1, IFT88, ADAM9, CLN6	1003	53	13528	2.0358547000507907	1.0	0.7937538321124209	83.63683488718482
GOTERM_BP_FAT	GO:0044264~cellular polysaccharide metabolic process	8	0.60882800608828	0.09457231054871294	PPP1CA, PPP1R3B, PYGL, GYS1, GYG2, CPS1, CERCAM, AGL	1003	53	13528	2.0358547000507907	1.0	0.7937538321124209	83.63683488718482
GOTERM_BP_FAT	GO:0006641~triglyceride metabolic process	7	0.532724505327245	0.0953705100424853	AGPAT6, PCSK9, CAT, CPS1, GPAM, PNPLA3, PTPN11	1003	43	13528	2.1956456212757076	1.0	0.7950832066228147	83.89768121977453
GOTERM_BP_FAT	GO:0006112~energy reserve metabolic process	7	0.532724505327245	0.0953705100424853	PPP1CA, PPP1R3B, PYGL, GYS1, GYG2, CPS1, AGL	1003	43	13528	2.1956456212757076	1.0	0.7950832066228147	83.89768121977453
GOTERM_BP_FAT	GO:0007346~regulation of mitotic cell cycle	17	1.2937595129375952	0.09739971150186472	NEK2, DLGAP5, STAT5A, STAT5B, CENPF, AFAP1L2, CDC16, ATM, APP, MAD2L1BP, TMEM8B, BCL2, KIF20B, MYO16, EGF, CCNA2, APC	1003	152	13528	1.5084745762711864	1.0	0.8007155212499248	84.54322970893287
GOTERM_BP_FAT	GO:0046578~regulation of Ras protein signal transduction	22	1.67427701674277	0.09811515041106988	OBSCN, VAV3, ASAP2, RABGAP1L, ARHGEF17, TRIO, DOCK7, ITPKB, PSD2, ASAP3, TBCK, MCF2L, USP6NL, PLEKHG1, TBC1D14, PLEKHG5, TBC1D5, AGAP1, SPATA13, ARHGEF10L, ARAP1, TBC1D2	1003	210	13528	1.412980107297156	1.0	0.801679732619799	84.76494084582698
GOTERM_BP_FAT	GO:0012501~programmed cell death	55	4.185692541856925	0.09874878319662111	E2F2, PPARD, FASTKD2, MCF2L, KCNIP3, ARHGAP4, TOP1, APP, HTRA2, GSN, CDKN2D, TOP2A, DFFA, BCL2A1, ARHGEF17, TNFRSF14, SLTM, RNF130, BNIP2, HIPK2, PSEN2, UBB, TNFAIP3, FAIM2, PRF1, LITAF, ERBB3, RTKN, ITM2B, FEM1B, FIS1, DAPL1, TNFRSF1B, BCL2, PLEKHG5, TNFRSF19, OBSCN, CARD8, VAV3, LGALS1, BIRC7, TRIO, DUSP22, STAT1, NTN1, ATM, BRCA1, DNASE2, SEMA6A, IFT57, ENDOG, BNIP3L, CYFIP2, FAF1, IFI6	1003	611	13528	1.2140991101980476	1.0	0.802352702461743	84.95878764455846
GOTERM_BP_FAT	GO:0070727~cellular macromolecule localization	39	2.968036529680365	0.09896203279340728	GNPTG, NPEPL1, STON1, STX7, SNX6, MLPH, ATP6AP1, MTX1, AKAP12, CALR, TGFB2, LONP2, ZFYVE16, TLK1, STAM, APPBP2, PEX12, COX18, KIF13B, RAB27A, FYB, SNUPN, NLGN1, VPS41, PTPRU, BBS2, YWHAH, ATG4C, YWHAQ, PTTG1IP, SDCBP, SORT1, SPTBN1, SIL1, KPNA5, SYTL2, SSR4, GGA2, TOB1	1003	414	13528	1.2705651162454665	1.0	0.8015867468764378	85.02350096255122

## Sheet: BRG1_10kb-bound_UP-List
Ensembl gene id	Gene name	Description	Average log2 change (shBRG1/shControl)	Adjusted p-value
ENSG00000092068	SLC7A8	solute carrier family 7 (amino acid transporter light chain, L system), member 8	1.24814	1.05e-169
ENSG00000106665	CLIP2	CAP-GLY domain containing linker protein 2	1.14203	8.27e-87
ENSG00000107521	HPS1	Hermansky-Pudlak syndrome 1	1.20917	1.22e-98
ENSG00000114019	AMOTL2	angiomotin like 2	2.98079	1.15e-270
ENSG00000115295	CLIP4	CAP-GLY domain containing linker protein family, member 4	1.00221	5.7e-08
ENSG00000115310	RTN4	reticulon 4	1.09138	3.55e-210
ENSG00000115738	ID2	inhibitor of DNA binding 2, dominant negative helix-loop-helix protein	3.22162	0
ENSG00000118680	MYL12B	myosin, light chain 12B, regulatory	1.1358	1.21e-187
ENSG00000119899	SLC17A5	solute carrier family 17 (anion/sugar transporter), member 5	1.25791	1.19e-238
ENSG00000126803	HSPA2	heat shock 70kDa protein 2	1.50257	8.43e-54
ENSG00000135046	ANXA1	annexin A1	6.86737	0
ENSG00000144824	PHLDB2	pleckstrin homology-like domain, family B, member 2	1.00957	3.32e-160
ENSG00000154734	ADAMTS1	ADAM metallopeptidase with thrombospondin type 1 motif, 1	1.21512	5.14e-45
ENSG00000163191	S100A11	S100 calcium binding protein A11	2.2641	0
ENSG00000165025	SYK	spleen tyrosine kinase	1.38441	3.84e-75
ENSG00000169247	SH3TC2	SH3 domain and tetratricopeptide repeats 2	1.6602	3.13e-66
ENSG00000170017	ALCAM	activated leukocyte cell adhesion molecule	1.43655	4.9e-30
ENSG00000176749	CDK5R1	cyclin-dependent kinase 5, regulatory subunit 1 (p35)	1.56657	9.14e-213
ENSG00000179820	MYADM	myeloid-associated differentiation marker	2.56495	3.73e-226
ENSG00000184351	KRTAP19-1	keratin associated protein 19-1	1.50126	3.65e-66
ENSG00000204580	DDR1	discoidin domain receptor tyrosine kinase 1	3.02272	3.29e-92
ENSG00000136111	TBC1D4	TBC1 domain family, member 4	1.04936	1.64e-49
ENSG00000136153	LMO7	LIM domain 7	1.85531	5.62e-23
ENSG00000166073	GPR176	G protein-coupled receptor 176	1.6047	3.56e-82
ENSG00000116717	GADD45A	growth arrest and DNA-damage-inducible, alpha	2.27746	0
ENSG00000150687	PRSS23	protease, serine, 23	3.34685	1.24e-118
ENSG00000060718	COL11A1	collagen, type XI, alpha 1	1.56441	0.000742965
ENSG00000163637	PRICKLE2	prickle homolog 2 (Drosophila)	1.14587	4.72e-12
ENSG00000105647	PIK3R2	phosphoinositide-3-kinase, regulatory subunit 2 (beta)	1.91445	0
ENSG00000173705	SUSD5	sushi domain containing 5	1.5338	1.11e-05
ENSG00000163110	PDLIM5	PDZ and LIM domain 5	1.31375	3.74e-198
ENSG00000120833	SOCS2	suppressor of cytokine signaling 2	2.16514	2.2e-94
ENSG00000158109	TPRG1L	tumor protein p63 regulated 1-like	1.83559	0
ENSG00000107796	ACTA2	actin, alpha 2, smooth muscle, aorta	1.70417	1.41e-13
ENSG00000105281	SLC1A5	solute carrier family 1 (neutral amino acid transporter), member 5	1.16735	6.78e-58
ENSG00000034152	MAP2K3	mitogen-activated protein kinase kinase 3	2.15126	1.5e-132
ENSG00000165406	MARCH8	membrane-associated ring finger (C3HC4) 8, E3 ubiquitin protein ligase	4.82295	1.19e-172
ENSG00000198431	TXNRD1	thioredoxin reductase 1	1.03231	3.8e-57
ENSG00000116117	PARD3B	par-3 partitioning defective 3 homolog B (C. elegans)	1.26982	1.16e-31
ENSG00000159200	RCAN1	regulator of calcineurin 1	1.06414	1.27e-119
ENSG00000119383	PPP2R4	protein phosphatase 2A activator, regulatory subunit 4	1.21677	2.16e-269
ENSG00000120694	HSPH1	heat shock 105kDa/110kDa protein 1	1.05611	0
ENSG00000140564	FURIN	furin (paired basic amino acid cleaving enzyme)	2.24256	0
ENSG00000120087	HOXB7	homeobox B7	1.68651	7.58e-36
ENSG00000023572	GLRX2	glutaredoxin 2	1.0394	2.27e-45
ENSG00000140807	NKD1	naked cuticle homolog 1 (Drosophila)	1.71738	2.69e-170
ENSG00000197747	S100A10	S100 calcium binding protein A10	1.62859	1.1e-68
ENSG00000105568	PPP2R1A	protein phosphatase 2, regulatory subunit A, alpha	1.39465	2.03e-230
ENSG00000150551	LYPD1	LY6/PLAUR domain containing 1	2.73609	1.14e-06
ENSG00000100292	HMOX1	heme oxygenase (decycling) 1	2.0362	7.97e-80
ENSG00000179152	TCAIM	T cell activation inhibitor, mitochondrial	1.29626	1.3e-74
ENSG00000131408	NR1H2	nuclear receptor subfamily 1, group H, member 2	2.10936	9.45e-137
ENSG00000123643	SLC36A1	solute carrier family 36 (proton/amino acid symporter), member 1	1.92041	0
ENSG00000171766	GATM	glycine amidinotransferase (L-arginine:glycine amidinotransferase)	1.08705	1.32e-11
ENSG00000081985	IL12RB2	interleukin 12 receptor, beta 2	1.91951	9.74e-10
ENSG00000107021	TBC1D13	TBC1 domain family, member 13	1.34655	2.18e-234
ENSG00000083720	OXCT1	3-oxoacid CoA transferase 1	1.51419	0.0183298
ENSG00000149357	LAMTOR1	late endosomal/lysosomal adaptor, MAPK and MTOR activator 1	1.40269	5.33e-62
ENSG00000113645	WWC1	WW and C2 domain containing 1	1.3143	2.14e-283
ENSG00000105499	PLA2G4C	phospholipase A2, group IVC (cytosolic, calcium-independent)	2.22601	3.59e-84
ENSG00000178913	TAF7	TAF7 RNA polymerase II, TATA box binding protein (TBP)-associated factor, 55kDa	1.39766	4.06e-203
ENSG00000109917	ZNF259	zinc finger protein 259	1.91971	0
ENSG00000117318	ID3	inhibitor of DNA binding 3, dominant negative helix-loop-helix protein	3.53319	0
ENSG00000179455	MKRN3	makorin ring finger protein 3	1.77159	1.76e-239
ENSG00000182253	SYNM	synemin, intermediate filament protein	2.18154	1.22e-08
ENSG00000155265	GOLGA7B	golgin A7 family, member B	1.93317	1.22e-80
ENSG00000135636	DYSF	dysferlin, limb girdle muscular dystrophy 2B (autosomal recessive)	1.24269	2.95e-21
ENSG00000197019	SERTAD1	SERTA domain containing 1	1.5077	7.48e-49
ENSG00000165410	CFL2	cofilin 2 (muscle)	1.28557	8.15e-112
ENSG00000158480	SPATA2	spermatogenesis associated 2	1.3784	1.33e-96
ENSG00000105700	KXD1	KxDL motif containing 1	1.01328	5.64e-79
ENSG00000168374	ARF4	ADP-ribosylation factor 4	1.82662	0
ENSG00000174943	KCTD13	potassium channel tetramerisation domain containing 13	1.26188	5.1e-201
ENSG00000127329	PTPRB	protein tyrosine phosphatase, receptor type, B	2.15136	2.49e-57
ENSG00000090530	LEPREL1	leprecan-like 1	1.4733	8.27e-21
ENSG00000144583	MARCH4	membrane-associated ring finger (C3HC4) 4, E3 ubiquitin protein ligase	3.69472	4.37e-32
ENSG00000169429	IL8	interleukin 8	1.78639	8.32e-51
ENSG00000186111	PIP5K1C	phosphatidylinositol-4-phosphate 5-kinase, type I, gamma	1.13864	3.62e-48
ENSG00000118960	HS1BP3	HCLS1 binding protein 3	1.70881	3.96e-131
ENSG00000146592	CREB5	cAMP responsive element binding protein 5	1.7776	0
ENSG00000166228	PCBD1	pterin-4 alpha-carbinolamine dehydratase/dimerization cofactor of hepatocyte nuclear factor 1 alpha	1.28029	5.44e-56
ENSG00000150990	DHX37	DEAH (Asp-Glu-Ala-His) box polypeptide 37	1.25463	5.12e-112
ENSG00000182511	FES	feline sarcoma oncogene	3.25296	1.63e-53
ENSG00000158079	PTPDC1	protein tyrosine phosphatase domain containing 1	1.03753	2.78e-60
ENSG00000246705	H2AFJ	H2A histone family, member J	1.65746	0.0396342
ENSG00000090615	GOLGA3	golgin A3	1.1013	0
ENSG00000224287	MSL3P1	male-specific lethal 3 homolog (Drosophila) pseudogene 1	1.18893	2.46e-107
ENSG00000076067	RBMS2	RNA binding motif, single stranded interacting protein 2	1.86136	2.52e-153
ENSG00000108511	HOXB6	homeobox B6	2.23228	1.12e-42
ENSG00000080845	DLGAP4	discs, large (Drosophila) homolog-associated protein 4	1.00045	8.08e-63
ENSG00000155090	KLF10	Kruppel-like factor 10	2.49737	1.15e-204
ENSG00000171067	C11orf24	chromosome 11 open reading frame 24	1.61551	1.55e-277
ENSG00000108176	DNAJC12	DnaJ (Hsp40) homolog, subfamily C, member 12	1.68201	3.31e-58
ENSG00000117228	GBP1	guanylate binding protein 1, interferon-inducible	3.35714	5.8e-72
ENSG00000204673	AKT1S1	AKT1 substrate 1 (proline-rich)	2.46196	0
ENSG00000130522	JUND	jun D proto-oncogene	2.05274	0
ENSG00000125971	DYNLRB1	dynein, light chain, roadblock-type 1	2.88226	0
ENSG00000119487	MAPKAP1	mitogen-activated protein kinase associated protein 1	1.09413	2.01e-60
ENSG00000173114	LRRN3	leucine rich repeat neuronal 3	1.55577	6.6e-109
ENSG00000164442	CITED2	Cbp/p300-interacting transactivator, with Glu/Asp-rich carboxy-terminal domain, 2	1.85623	6.32e-132
ENSG00000168685	IL7R	interleukin 7 receptor	1.47088	4.67e-06
ENSG00000116649	SRM	spermidine synthase	1.60981	1.01e-75
ENSG00000085276	MECOM	MDS1 and EVI1 complex locus	1.83533	3.44e-46
ENSG00000136933	RABEPK	Rab9 effector protein with kelch motifs	1.78629	2.69e-201
ENSG00000144868	TMEM108	transmembrane protein 108	3.63356	2.31e-20
ENSG00000099860	GADD45B	growth arrest and DNA-damage-inducible, beta	2.05208	3.96e-91
ENSG00000128342	LIF	leukemia inhibitory factor	2.10063	8.94e-26
ENSG00000137959	IFI44L	interferon-induced protein 44-like	3.96644	7.7e-09
ENSG00000087074	PPP1R15A	protein phosphatase 1, regulatory subunit 15A	1.3074	6.9e-61
ENSG00000170989	S1PR1	sphingosine-1-phosphate receptor 1	4.41223	2.88e-120
ENSG00000238121	LINC00426	long intergenic non-protein coding RNA 426	1.35497	2.23e-69
ENSG00000145147	SLIT2	slit homolog 2 (Drosophila)	2.43849	6.65e-42
ENSG00000023608	SNAPC1	small nuclear RNA activating complex, polypeptide 1, 43kDa	1.30199	2.12e-89
ENSG00000125968	ID1	inhibitor of DNA binding 1, dominant negative helix-loop-helix protein	2.7381	1.54e-205
ENSG00000196159	FAT4	FAT tumor suppressor homolog 4 (Drosophila)	1.06244	1.06e-23
ENSG00000117289	TXNIP	thioredoxin interacting protein	2.36316	3.41e-44
ENSG00000172465	TCEAL1	transcription elongation factor A (SII)-like 1	1.05651	1.45e-27
ENSG00000106278	PTPRZ1	protein tyrosine phosphatase, receptor-type, Z polypeptide 1	1.02587	3.99e-24
ENSG00000113083	LOX	lysyl oxidase	1.7938	3.19e-14
ENSG00000137955	RABGGTB	Rab geranylgeranyltransferase, beta subunit	1.24306	0
ENSG00000145247	OCIAD2	OCIA domain containing 2	1.43635	0.0346949
ENSG00000160209	PDXK	pyridoxal (pyridoxine, vitamin B6) kinase	1.10383	2.38e-205
ENSG00000088826	SMOX	spermine oxidase	1.01915	1.99e-25
ENSG00000185920	PTCH1	patched 1	1.52697	2.08e-68
ENSG00000013588	GPRC5A	G protein-coupled receptor, family C, group 5, member A	1.5925	1.97e-10
ENSG00000231925	TAPBP	TAP binding protein (tapasin)	1.12348	1.83e-186
ENSG00000132376	INPP5K	inositol polyphosphate-5-phosphatase K	1.40324	2.35e-111
ENSG00000198246	SLC29A3	solute carrier family 29 (nucleoside transporters), member 3	1.09207	2.93e-24
ENSG00000156239	N6AMT1	N-6 adenine-specific DNA methyltransferase 1 (putative)	1.7898	2.64e-110
ENSG00000179598	PLD6	phospholipase D family, member 6	1.05718	3.06e-34
ENSG00000124380	SNRNP27	small nuclear ribonucleoprotein 27kDa (U4/U6.U5)	1.41126	1.37e-146
ENSG00000175221	MED16	mediator complex subunit 16	1.06259	7.62e-37
ENSG00000162819	BROX	BRO1 domain and CAAX motif containing	1.23101	1.19e-161
ENSG00000133106	EPSTI1	epithelial stromal interaction 1 (breast)	1.61862	0.0450131
ENSG00000176142	TMEM39A	transmembrane protein 39A	1.01551	6.72e-136
ENSG00000104885	DOT1L	DOT1-like, histone H3 methyltransferase (S. cerevisiae)	1.29598	8.72e-97
ENSG00000152620	NADKD1	NAD kinase domain containing 1	1.13084	7.73e-72
ENSG00000114529	C3orf52	chromosome 3 open reading frame 52	1.99471	0.0132548
ENSG00000147592	LACTB2	lactamase, beta 2	1.05444	2.14e-56
ENSG00000162413	KLHL21	kelch-like 21 (Drosophila)	1.08904	1.47e-82
ENSG00000105058	FAM32A	family with sequence similarity 32, member A	1.27229	0
ENSG00000167118	URM1	ubiquitin related modifier 1	1.27902	1.77e-73
ENSG00000123610	TNFAIP6	tumor necrosis factor, alpha-induced protein 6	1.50803	4.49e-06
ENSG00000128683	GAD1	glutamate decarboxylase 1 (brain, 67kDa)	1.53949	4.17e-06
ENSG00000169976	SF3B5	splicing factor 3b, subunit 5, 10kDa	1.17503	3.3e-70
ENSG00000168096	ANKS3	ankyrin repeat and sterile alpha motif domain containing 3	1.16093	1.73e-51
ENSG00000169330	KIAA1024	KIAA1024	1.22274	8.67e-22
ENSG00000140931	CMTM3	CKLF-like MARVEL transmembrane domain containing 3	2.33441	0
ENSG00000198346	ZNF813	zinc finger protein 813	1.07739	5.88e-18
ENSG00000136098	NEK3	NIMA (never in mitosis gene a)-related kinase 3	1.16261	0.00752664
ENSG00000196182	STK40	serine/threonine kinase 40	2.19522	0
ENSG00000237836	PHKA2-AS1	PHKA2 antisense RNA 1	2.81737	0
ENSG00000155380	SLC16A1	solute carrier family 16, member 1 (monocarboxylic acid transporter 1)	1.02857	3.49e-72
ENSG00000117682	DHDDS	dehydrodolichyl diphosphate synthase	1.01618	1.78e-104
ENSG00000124702	KLHDC3	kelch domain containing 3	1.90267	0
ENSG00000080493	SLC4A4	solute carrier family 4, sodium bicarbonate cotransporter, member 4	1.79224	4.88e-07
ENSG00000177106	EPS8L2	EPS8-like 2	1.6999	2.5e-66
ENSG00000197375	SLC22A5	solute carrier family 22 (organic cation/carnitine transporter), member 5	2.59428	1.86e-122
ENSG00000267100	ILF3-AS1	ILF3 antisense RNA 1 (head to head)	1.85485	3.31e-282
ENSG00000196263	ZNF471	zinc finger protein 471	1.74341	4e-43
ENSG00000165171	WBSCR27	Williams Beuren syndrome chromosome region 27	1.16195	2.27e-07
ENSG00000186432	KPNA4	karyopherin alpha 4 (importin alpha 3)	1.12942	0
ENSG00000012171	SEMA3B	sema domain, immunoglobulin domain (Ig), short basic domain, secreted, (semaphorin) 3B	1.1766	7.45e-24
ENSG00000197168	NEK5	NIMA (never in mitosis gene a)-related kinase 5	1.00727	0.000592885
ENSG00000168795	ZBTB5	zinc finger and BTB domain containing 5	1.18077	3.59e-91
ENSG00000162944	RFTN2	raftlin family member 2	1.11862	5.79e-11
ENSG00000107175	CREB3	cAMP responsive element binding protein 3	1.05154	5.22e-85
ENSG00000114942	EEF1B2	eukaryotic translation elongation factor 1 beta 2	1.02063	2.43e-62
ENSG00000006652	IFRD1	interferon-related developmental regulator 1	1.44567	3.06e-147
ENSG00000136167	LCP1	lymphocyte cytosolic protein 1 (L-plastin)	1.91938	1.71e-112
ENSG00000122390	NAA60	N(alpha)-acetyltransferase 60, NatF catalytic subunit	1.14654	2.02e-84
ENSG00000120805	ARL1	ADP-ribosylation factor-like 1	1.12965	8.32e-99
ENSG00000134058	CDK7	cyclin-dependent kinase 7	1.42085	2.91e-161
ENSG00000162892	IL24	interleukin 24	2.48018	1.3e-30
ENSG00000166578	IQCD	IQ motif containing D	2.31772	5.4e-106
ENSG00000247092	SNHG10	small nucleolar RNA host gene 10 (non-protein coding)	2.95046	0
ENSG00000147535	PPAPDC1B	phosphatidic acid phosphatase type 2 domain containing 1B	1.90177	0
ENSG00000059573	ALDH18A1	aldehyde dehydrogenase 18 family, member A1	2.09119	4.44e-204
ENSG00000139174	PRICKLE1	prickle homolog 1 (Drosophila)	2.1205	8.23e-18
ENSG00000048162	NOP16	NOP16 nucleolar protein homolog (yeast)	1.10564	7.67e-68
ENSG00000119559	C19orf25	chromosome 19 open reading frame 25	1.43959	7.02e-75
ENSG00000111913	FAM65B	family with sequence similarity 65, member B	2.9465	1.16e-08
ENSG00000161847	RAVER1	ribonucleoprotein, PTB-binding 1	1.25237	1.91e-78
ENSG00000102554	KLF5	Kruppel-like factor 5 (intestinal)	1.28604	1.15e-167
ENSG00000006194	ZNF263	zinc finger protein 263	1.30328	9.4e-193
ENSG00000116337	AMPD2	adenosine monophosphate deaminase 2	1.09862	2.15e-51
ENSG00000161179	YDJC	YdjC homolog (bacterial)	1.3082	1.18e-36
ENSG00000235989	MORC2-AS1	MORC2 antisense RNA 1	1.73899	2.44e-65
ENSG00000137460	FHDC1	FH2 domain containing 1	1.24191	1.86e-15
ENSG00000196867	ZFP28	zinc finger protein 28 homolog (mouse)	1.00755	3.07e-21
ENSG00000142627	EPHA2	EPH receptor A2	1.04594	1.25e-34
ENSG00000135632	SMYD5	SMYD family member 5	1.50916	6.11e-118
ENSG00000196421	LINC00176	long intergenic non-protein coding RNA 176	1.59198	3.06e-66
ENSG00000169905	TOR1AIP2	torsin A interacting protein 2	1.00728	0
ENSG00000198000	NOL8	nucleolar protein 8	1.07563	1.2e-227
ENSG00000219481	NBPF1	neuroblastoma breakpoint family, member 1	1.295	1.58e-161
ENSG00000143878	RHOB	ras homolog family member B	1.89481	0
ENSG00000136244	IL6	interleukin 6 (interferon, beta 2)	4.67876	4.53e-21
ENSG00000187678	SPRY4	sprouty homolog 4 (Drosophila)	1.22026	2.91e-57
ENSG00000050820	BCAR1	breast cancer anti-estrogen resistance 1	1.18303	1.62e-33
ENSG00000106868	SUSD1	sushi domain containing 1	1.12168	6.65e-07
ENSG00000168256	NKIRAS2	NFKB inhibitor interacting Ras-like 2	1.43986	7.7e-229
ENSG00000168288	MMADHC	methylmalonic aciduria (cobalamin deficiency) cblD type, with homocystinuria	1.0698	0
ENSG00000197982	C1orf122	chromosome 1 open reading frame 122	1.30074	1.46e-205
ENSG00000140043	PTGR2	prostaglandin reductase 2	1.18026	7.51e-49
ENSG00000171522	PTGER4	prostaglandin E receptor 4 (subtype EP4)	3.32161	9.21e-79
ENSG00000125864	BFSP1	beaded filament structural protein 1, filensin	1.04153	7.2e-33
ENSG00000140006	WDR89	WD repeat domain 89	1.12759	2.43e-51
ENSG00000155366	RHOC	ras homolog family member C	1.08402	3.41e-43
ENSG00000198523	PLN	phospholamban	1.52277	0.0429188
ENSG00000137727	ARHGAP20	Rho GTPase activating protein 20	1.41852	7.2e-07
ENSG00000158715	SLC45A3	solute carrier family 45, member 3	1.37334	2.7e-37
ENSG00000171466	ZNF562	zinc finger protein 562	1.42118	2.82e-63
ENSG00000116922	C1orf109	chromosome 1 open reading frame 109	1.01618	8.21e-205
ENSG00000110025	SNX15	sorting nexin 15	2.75203	5.62e-197
ENSG00000149054	ZNF215	zinc finger protein 215	1.57734	1.06e-31
ENSG00000221886	C5orf54	chromosome 5 open reading frame 54	1.01919	2.11e-48
ENSG00000136856	SLC2A8	solute carrier family 2 (facilitated glucose transporter), member 8	1.76526	5.12e-70
ENSG00000180611	MB21D2	Mab-21 domain containing 2	1.61721	4.66e-215
ENSG00000174130	TLR6	toll-like receptor 6	2.35398	1.75e-93
ENSG00000041982	TNC	tenascin C	2.86658	1.16e-118
ENSG00000232956	SNHG15	small nucleolar RNA host gene 15 (non-protein coding)	1.07173	8.81e-31
ENSG00000084628	NKAIN1	Na+/K+ transporting ATPase interacting 1	3.33827	5.09e-21
ENSG00000172031	EPHX4	epoxide hydrolase 4	1.68935	3.53e-07
ENSG00000088356	PDRG1	p53 and DNA-damage regulated 1	1.13967	3.01e-101
ENSG00000125848	FLRT3	fibronectin leucine rich transmembrane protein 3	1.06467	0.0023738
ENSG00000183386	FHL3	four and a half LIM domains 3	1.41759	1.63e-108
ENSG00000196428	TSC22D2	TSC22 domain family, member 2	2.18799	0
ENSG00000108433	GOSR2	golgi SNAP receptor complex member 2	1.8944	5.03e-121
ENSG00000132570	PCBD2	pterin-4 alpha-carbinolamine dehydratase/dimerization cofactor of hepatocyte nuclear factor 1 alpha (TCF1) 2	1.44212	4.43e-25
ENSG00000163738	MTHFD2L	methylenetetrahydrofolate dehydrogenase (NADP+ dependent) 2-like	1.7176	7e-221
ENSG00000182141	ZNF708	zinc finger protein 708	1.2299	2.68e-32
ENSG00000107821	KAZALD1	Kazal-type serine peptidase inhibitor domain 1	1.64603	2.39e-44
ENSG00000110104	CCDC86	coiled-coil domain containing 86	1.28216	6.05e-74
ENSG00000130332	LSM7	LSM7 homolog, U6 small nuclear RNA associated (S. cerevisiae)	1.35733	3.98e-70
ENSG00000154153	FAM134B	family with sequence similarity 134, member B	1.43341	1.48e-82
ENSG00000148935	GAS2	growth arrest-specific 2	1.96063	1.4e-10
ENSG00000174498	IGDCC3	immunoglobulin superfamily, DCC subclass, member 3	1.35036	1.09e-14
ENSG00000172071	EIF2AK3	eukaryotic translation initiation factor 2-alpha kinase 3	1.69371	0
ENSG00000163032	VSNL1	visinin-like 1	1.18981	0.0224924
ENSG00000118523	CTGF	connective tissue growth factor	3.96652	0
ENSG00000227124	ZNF717	zinc finger protein 717	1.06866	3.07e-43
ENSG00000162772	ATF3	activating transcription factor 3	1.06113	2.62e-25
ENSG00000167625	ZNF526	zinc finger protein 526	1.43889	1.7e-74
ENSG00000149150	SLC43A1	solute carrier family 43, member 1	1.09993	6.43e-47
ENSG00000121579	NAA50	N(alpha)-acetyltransferase 50, NatE catalytic subunit	1.21108	9.1e-182
ENSG00000214706	IFRD2	interferon-related developmental regulator 2	1.47373	1.84e-86
ENSG00000196214	ZNF766	zinc finger protein 766	1.65797	1.7e-73
ENSG00000163545	NUAK2	NUAK family, SNF1-like kinase, 2	3.44058	3.35e-220
ENSG00000161912	ADCY10P1	adenylate cyclase 10 (soluble) pseudogene 1	2.13926	4.56e-164
ENSG00000112936	C7	complement component 7	1.65198	0.0350143
ENSG00000168505	GBX2	gastrulation brain homeobox 2	1.88913	1.13e-26
ENSG00000018869	ZNF582	zinc finger protein 582	2.97809	3.09e-64
ENSG00000196357	ZNF565	zinc finger protein 565	1.42968	1.73e-22
ENSG00000170260	ZNF212	zinc finger protein 212	1.02901	1.17e-45
ENSG00000126603	GLIS2	GLIS family zinc finger 2	1.23581	3.15e-36
ENSG00000173120	KDM2A	lysine (K)-specific demethylase 2A	1.11795	5.34e-239
ENSG00000198517	MAFK	v-maf musculoaponeurotic fibrosarcoma oncogene homolog K (avian)	1.44634	2.16e-55
ENSG00000167565	SERTAD3	SERTA domain containing 3	1.07003	6.89e-32
ENSG00000173334	TRIB1	tribbles homolog 1 (Drosophila)	1.1272	2.43e-66
ENSG00000253771	TPTE2P1	transmembrane phosphoinositide 3-phosphatase and tensin homolog 2 pseudogene 1	1.0952	0.00295292
ENSG00000161021	MAML1	mastermind-like 1 (Drosophila)	1.02169	1.03e-122
ENSG00000197961	ZNF121	zinc finger protein 121	1.49206	4.77e-96
ENSG00000130766	SESN2	sestrin 2	1.10885	2.62e-13
ENSG00000052749	RRP12	ribosomal RNA processing 12 homolog (S. cerevisiae)	1.24597	1.04e-68
ENSG00000228175	GEMIN8P4	gem (nuclear organelle) associated protein 8 pseudogene 4	1.48603	5.12e-33
ENSG00000163734	CXCL3	chemokine (C-X-C motif) ligand 3	2.76332	1.43e-24
ENSG00000159479	MED8	mediator complex subunit 8	1.05433	3.38e-130
ENSG00000178537	SLC25A20	solute carrier family 25 (carnitine/acylcarnitine translocase), member 20	1.29555	8.41e-50
ENSG00000100403	ZC3H7B	zinc finger CCCH-type containing 7B	1.20429	1.48e-43
ENSG00000151917	BEND6	BEN domain containing 6	1.66833	4.41e-06
ENSG00000106025	TSPAN12	tetraspanin 12	2.20954	1.16e-56
ENSG00000105771	SMG9	smg-9 homolog, nonsense mediated mRNA decay factor (C. elegans)	1.18408	1.15e-53
ENSG00000014914	MTMR11	myotubularin related protein 11	3.17619	6.13e-110
ENSG00000196843	ARID5A	AT rich interactive domain 5A (MRF1-like)	1.07148	1.31e-14
ENSG00000078487	ZCWPW1	zinc finger, CW type with PWWP domain 1	2.06929	1.91e-22
ENSG00000168826	ZBTB49	zinc finger and BTB domain containing 49	1.03924	6.69e-31
ENSG00000171124	FUT3	fucosyltransferase 3 (galactoside 3(4)-L-fucosyltransferase, Lewis blood group)	1.06117	2.61e-06
ENSG00000076984	MAP2K7	mitogen-activated protein kinase kinase 7	1.03478	5.3e-99
ENSG00000169403	PTAFR	platelet-activating factor receptor	1.75152	4.44e-21
ENSG00000135407	AVIL	advillin	1.77551	6.05e-17
ENSG00000186174	BCL9L	B-cell CLL/lymphoma 9-like	1.69729	1.37e-37
ENSG00000132881	RSG1	REM2 and RAB-like small GTPase 1	1.10772	1.16e-20
ENSG00000249087	C1orf213	chromosome 1 open reading frame 213	1.3624	8.36e-34
ENSG00000163138	PACRGL	PARK2 co-regulated-like	1.02809	6.48e-33
ENSG00000180422	LINC00304	long intergenic non-protein coding RNA 304	1.12547	7.84e-09
ENSG00000109065	NAT9	N-acetyltransferase 9 (GCN5-related, putative)	1.63363	4.21e-114
ENSG00000196110	ZNF699	zinc finger protein 699	1.60524	8.66e-44
ENSG00000167772	ANGPTL4	angiopoietin-like 4	1.74634	0.00373807
ENSG00000176386	CDC26	cell division cycle 26 homolog (S. cerevisiae)	1.24084	4.97e-38
ENSG00000207650	MIR570	microRNA 570	1.29832	6.17e-13
ENSG00000260339	HEXA-AS1	HEXA antisense RNA 1	1.16625	6.14e-05
ENSG00000102804	TSC22D1	TSC22 domain family, member 1	1.0011	3.09e-145
ENSG00000138382	METTL5	methyltransferase like 5	1.44658	1.63e-51
ENSG00000108821	COL1A1	collagen, type I, alpha 1	2.14522	1.46e-32
ENSG00000143110	C1orf162	chromosome 1 open reading frame 162	1.49429	5.08e-18
ENSG00000188211	NCR3LG1	natural killer cell cytotoxicity receptor 3 ligand 1	1.28103	3.82e-20
ENSG00000115009	CCL20	chemokine (C-C motif) ligand 20	2.32845	4.43e-25
ENSG00000153989	NUS1	nuclear undecaprenyl pyrophosphate synthase 1 homolog (S. cerevisiae)	1.02488	5.3e-108
ENSG00000240280	TCAM1P	testicular cell adhesion molecule 1 homolog (mouse), pseudogene	1.62103	2.76e-16
ENSG00000205704	LINC00634	long intergenic non-protein coding RNA 634	1.13038	9.08e-07
ENSG00000198518	HIST1H4E	histone cluster 1, H4e	1.16991	2.01e-10
ENSG00000173175	ADCY5	adenylate cyclase 5	1.5755	1.16e-23
ENSG00000078967	UBE2D4	ubiquitin-conjugating enzyme E2D 4 (putative)	1.90975	1.75e-168
ENSG00000162645	GBP2	guanylate binding protein 2, interferon-inducible	3.13411	3.57e-54
ENSG00000114757	PEX5L	peroxisomal biogenesis factor 5-like	1.04568	6.64e-06
ENSG00000103942	HOMER2	homer homolog 2 (Drosophila)	1.27145	4.57e-22
ENSG00000215386	LINC00478	long intergenic non-protein coding RNA 478	2.04791	8.08e-21
ENSG00000164951	PDP1	pyruvate dehyrogenase phosphatase catalytic subunit 1	2.37694	0
ENSG00000163806	SPDYA	speedy homolog A (Xenopus laevis)	1.15821	2.32e-08
ENSG00000175854	SWI5	SWI5 recombination repair homolog (yeast)	1.38216	1.19e-128
ENSG00000092871	RFFL	ring finger and FYVE-like domain containing E3 ubiquitin protein ligase	1.31986	3.16e-49
ENSG00000126231	PROZ	protein Z, vitamin K-dependent plasma glycoprotein	1.00114	1.01e-06
ENSG00000130176	CNN1	calponin 1, basic, smooth muscle	4.95091	1.14e-117
ENSG00000267041	ZNF850	zinc finger protein 850	2.46573	3.31e-85
ENSG00000084636	COL16A1	collagen, type XVI, alpha 1	1.47813	2.07e-60
ENSG00000171448	ZBTB26	zinc finger and BTB domain containing 26	1.26981	4.65e-110
ENSG00000138395	CDK15	cyclin-dependent kinase 15	1.3517	1.64e-27
ENSG00000148677	ANKRD1	ankyrin repeat domain 1 (cardiac muscle)	7.11764	0
ENSG00000197841	ZNF181	zinc finger protein 181	1.09213	2.77e-30
ENSG00000135346	CGA	glycoprotein hormones, alpha polypeptide	1.97628	6.15e-16
ENSG00000214212	C19orf38	chromosome 19 open reading frame 38	1.6777	9.84e-11
ENSG00000001561	ENPP4	ectonucleotide pyrophosphatase/phosphodiesterase 4 (putative)	2.25552	6.41e-49
ENSG00000130544	ZNF557	zinc finger protein 557	1.048	2.46e-37
ENSG00000165899	OTOGL	otogelin-like	1.13941	0.000506874
ENSG00000109534	GAR1	GAR1 ribonucleoprotein homolog (yeast)	1.84476	0
ENSG00000165388	ZNF488	zinc finger protein 488	2.48532	0.000423734
ENSG00000047365	ARAP2	ArfGAP with RhoGAP domain, ankyrin repeat and PH domain 2	1.10487	3.44e-40
ENSG00000112658	SRF	serum response factor (c-fos serum response element-binding transcription factor)	1.2071	2.89e-75
ENSG00000196152	ZNF79	zinc finger protein 79	2.03694	1.33e-98
ENSG00000147394	ZNF185	zinc finger protein 185 (LIM domain)	1.5652	8.8e-56
ENSG00000164850	GPER	G protein-coupled estrogen receptor 1	2.59192	1.42e-30
ENSG00000181798	LINC00471	long intergenic non-protein coding RNA 471	1.53657	2.68e-11
ENSG00000233122	CTAGE7P	CTAGE family, member 7, pseudogene	1.72097	7.58e-19
ENSG00000187187	ZNF546	zinc finger protein 546	1.49725	5.38e-28
ENSG00000134815	DHX34	DEAH (Asp-Glu-Ala-His) box polypeptide 34	1.26009	8.75e-56
ENSG00000180481	GLIPR1L2	GLI pathogenesis-related 1 like 2	1.2831	0.00660952
ENSG00000198440	ZNF583	zinc finger protein 583	1.90554	5.3e-49
ENSG00000151014	CCRN4L	CCR4 carbon catabolite repression 4-like (S. cerevisiae)	1.61049	1.58e-190
ENSG00000122644	ARL4A	ADP-ribosylation factor-like 4A	1.38957	3.45e-171
ENSG00000239649	MYADML	myeloid-associated differentiation marker-like (pseudogene)	2.73479	3.76e-20
ENSG00000118094	TREH	trehalase (brush-border membrane glycoprotein)	1.89954	4.45e-11
ENSG00000149633	KIAA1755	KIAA1755	3.7992	1.31e-11
ENSG00000196646	ZNF136	zinc finger protein 136	1.21483	5.64e-54
ENSG00000167523	C16orf55	chromosome 16 open reading frame 55	1.10395	3.06e-37
ENSG00000074527	NTN4	netrin 4	2.04997	3.24e-12
ENSG00000182885	GPR97	G protein-coupled receptor 97	2.06639	3.56e-09
ENSG00000141028	CDRT15P1	CMT1A duplicated region transcript 15 pseudogene 1	1.54565	2.6e-07
ENSG00000126550	HTN1	histatin 1	4.13033	6.63e-192
ENSG00000163762	TM4SF18	transmembrane 4 L six family member 18	1.44454	4.13e-27
ENSG00000243678	NME1-NME2	NME1-NME2 readthrough	1.17265	9.72e-17
ENSG00000227543	SPAG5-AS1	SPAG5 antisense RNA 1	1.37337	1.1e-26
ENSG00000056558	TRAF1	TNF receptor-associated factor 1	3.77453	9.65e-81
ENSG00000169245	CXCL10	chemokine (C-X-C motif) ligand 10	2.9295	3.84e-05
ENSG00000163898	LIPH	lipase, member H	3.87583	3.36e-73
ENSG00000167635	ZNF146	zinc finger protein 146	1.00161	2.02e-106
ENSG00000239523	MYLK-AS1	MYLK antisense RNA 1	2.78189	3.62e-65
ENSG00000181666	HKR1	HKR1, GLI-Kruppel zinc finger family member	1.40344	2.22e-276
ENSG00000184838	PRR16	proline rich 16	1.72541	1.52e-43
ENSG00000131379	C3orf20	chromosome 3 open reading frame 20	3.47472	2.16e-25
ENSG00000145908	ZNF300	zinc finger protein 300	3.24218	0
ENSG00000151687	ANKAR	ankyrin and armadillo repeat containing	1.61246	1.89e-25
ENSG00000162616	DNAJB4	DnaJ (Hsp40) homolog, subfamily B, member 4	1.01605	5.28e-71
ENSG00000125740	FOSB	FBJ murine osteosarcoma viral oncogene homolog B	1.77754	1e-41
ENSG00000212724	KRTAP2-3	keratin associated protein 2-3	7.7895	2.08e-279
ENSG00000145864	GABRB2	gamma-aminobutyric acid (GABA) A receptor, beta 2	3.71819	3.54e-14
ENSG00000145075	CCDC39	coiled-coil domain containing 39	1.14336	8.55e-34
ENSG00000185958	FAM186A	family with sequence similarity 186, member A	1.26168	8.23e-07
ENSG00000172201	ID4	inhibitor of DNA binding 4, dominant negative helix-loop-helix protein	1.85573	9.29e-54
ENSG00000136383	ALPK3	alpha-kinase 3	1.0108	1.34e-05
ENSG00000156886	ITGAD	integrin, alpha D	1.08417	0.000161156
ENSG00000205853	RFPL3-AS1	RFPL3 antisense RNA 1	1.99477	1.33e-13
ENSG00000253117	OC90	otoconin 90	1.60549	0.000253013
ENSG00000058085	LAMC2	laminin, gamma 2	1.61389	4.39e-09
ENSG00000157211	CDCP2	CUB domain containing protein 2	1.48275	0.00038656
ENSG00000188573	FBLL1	fibrillarin-like 1	1.78818	2.41e-21
ENSG00000189266	PNRC2	proline-rich nuclear receptor coactivator 2	1.15341	0
ENSG00000135437	RDH5	retinol dehydrogenase 5 (11-cis/9-cis)	1.27047	5.93e-08
ENSG00000205111	CDKL4	cyclin-dependent kinase-like 4	2.38317	0.00287354
ENSG00000182389	CACNB4	calcium channel, voltage-dependent, beta 4 subunit	1.34554	1.3e-11
ENSG00000189042	ZNF567	zinc finger protein 567	1.37767	4.27e-66
ENSG00000078018	MAP2	microtubule-associated protein 2	1.82083	8.05e-109
ENSG00000163915	C3orf65	chromosome 3 open reading frame 65	2.98267	8.19e-14
ENSG00000151967	SCHIP1	schwannomin interacting protein 1	3.47721	2.28e-12
ENSG00000175573	C11orf68	chromosome 11 open reading frame 68	1.32212	4.93e-45
ENSG00000178381	ZFAND2A	zinc finger, AN1-type domain 2A	2.15393	7.66e-276
ENSG00000189164	ZNF527	zinc finger protein 527	1.3791	4.13e-47
ENSG00000111725	PRKAB1	protein kinase, AMP-activated, beta 1 non-catalytic subunit	1.2516	7.67e-119
ENSG00000117425	PTCH2	patched 2	2.97818	2.43e-71
ENSG00000197780	TAF13	TAF13 RNA polymerase II, TATA box binding protein (TBP)-associated factor, 18kDa	1.15574	5.99e-302
ENSG00000118004	COLEC11	collectin sub-family member 11	4.06492	2.46e-36
ENSG00000169047	IRS1	insulin receptor substrate 1	1.54227	2.08e-143
ENSG00000253661	ZFHX4-AS1	ZFHX4 antisense RNA 1	2.55699	2.56e-08
ENSG00000166396	SERPINB7	serpin peptidase inhibitor, clade B (ovalbumin), member 7	3.19916	1.58e-16
ENSG00000130479	MAP1S	microtubule-associated protein 1S	1.01179	1.98e-43
ENSG00000083750	RRAGB	Ras-related GTP binding B	1.30828	5.61e-55
ENSG00000151322	NPAS3	neuronal PAS domain protein 3	1.01789	0.00314209
ENSG00000134240	HMGCS2	3-hydroxy-3-methylglutaryl-CoA synthase 2 (mitochondrial)	1.46857	0.0165556
ENSG00000171804	WDR87	WD repeat domain 87	5.51334	6.65e-54
ENSG00000226167	AP4B1-AS1	AP4B1 antisense RNA 1	1.81393	1.36e-25
ENSG00000178297	TMPRSS9	transmembrane protease, serine 9	1.27166	2.44e-10
ENSG00000165494	PCF11	PCF11, cleavage and polyadenylation factor subunit, homolog (S. cerevisiae)	1.11164	9.15e-67
ENSG00000149582	TMEM25	transmembrane protein 25	2.0557	8.09e-11
ENSG00000168263	KCNV2	potassium channel, subfamily V, member 2	1.10024	3.3e-05
ENSG00000118420	UBE3D	ubiquitin protein ligase E3D	1.10798	1.82e-48
ENSG00000212607	SNORA45	small nucleolar RNA, H/ACA box 45	2.09742	1.5e-18
ENSG00000184786	TCTE3	t-complex-associated-testis-expressed 3	1.92843	9.52e-19
ENSG00000004948	CALCR	calcitonin receptor	2.02298	3.51e-05
ENSG00000176261	ZBTB8OS	zinc finger and BTB domain containing 8 opposite strand	1.18018	2.03e-167
ENSG00000090382	LYZ	lysozyme	3.2255	3.78e-28
ENSG00000053372	MRTO4	mRNA turnover 4 homolog (S. cerevisiae)	1.13839	4.92e-223
ENSG00000173077	DEC1	deleted in esophageal cancer 1	2.80913	6.25e-21
ENSG00000165275	TRMT10B	tRNA methyltransferase 10 homolog B (S. cerevisiae)	1.29757	9.03e-75
ENSG00000197405	C5AR1	complement component 5a receptor 1	2.20143	7.36e-07
ENSG00000176092	AIM1L	absent in melanoma 1-like	2.72226	1.22e-24
ENSG00000250312	ZNF718	zinc finger protein 718	1.49181	7.17e-18
ENSG00000187801	ZNF643	zinc finger protein 643	1.57187	9.2e-19
ENSG00000214049	UCA1	urothelial cancer associated 1 (non-protein coding)	3.66011	1.32e-19
ENSG00000244734	HBB	hemoglobin, beta	1.88521	0.000525208
ENSG00000255150	EID3	EP300 interacting inhibitor of differentiation 3	4.44954	1.11e-71
ENSG00000119335	SET	SET nuclear oncogene	1.05291	5.82e-115
ENSG00000118432	CNR1	cannabinoid receptor 1 (brain)	3.12095	1.57e-45
ENSG00000089692	LAG3	lymphocyte-activation gene 3	2.14628	2.42e-07
ENSG00000134539	KLRD1	killer cell lectin-like receptor subfamily D, member 1	1.55381	7.33e-08
ENSG00000167654	ATCAY	ataxia, cerebellar, Cayman type	1.00685	1.54e-05
ENSG00000179256	C12orf69	chromosome 12 open reading frame 69	1.16769	0.000101624
ENSG00000171827	ZNF570	zinc finger protein 570	1.81831	1.64e-49
ENSG00000186026	ZNF284	zinc finger protein 284	1.32651	2.01e-46
ENSG00000219294	PIP5K1P1	phosphatidylinositol-4-phosphate 5-kinase, type I, pseudogene 1	1.17658	0.0426463
ENSG00000158525	CPA5	carboxypeptidase A5	1.75904	0.000248012
ENSG00000144406	UNC80	unc-80 homolog (C. elegans)	2.35505	7.28e-68
ENSG00000205639	MFSD2B	major facilitator superfamily domain containing 2B	1.4392	4.85e-08
ENSG00000154065	ANKRD29	ankyrin repeat domain 29	1.17014	9.21e-20
ENSG00000231028	LINC00271	long intergenic non-protein coding RNA 271	1.29794	6.58e-05
ENSG00000213033	AURKAPS1	aurora kinase A pseudogene 1	2.8585	1.12e-31
ENSG00000197279	ZNF165	zinc finger protein 165	1.2529	1.78e-13
ENSG00000097096	SYDE2	synapse defective 1, Rho GTPase, homolog 2 (C. elegans)	1.29299	4.4e-22
ENSG00000142046	TMEM91	transmembrane protein 91	1.09727	1.04e-10
ENSG00000151023	ENKUR	enkurin, TRPC channel interacting protein	1.73219	1.69e-07
ENSG00000157315	TMED6	transmembrane emp24 protein transport domain containing 6	1.03668	6.85e-05
ENSG00000152705	CATSPER3	cation channel, sperm associated 3	3.47527	1.74e-08
ENSG00000068028	RASSF1	Ras association (RalGDS/AF-6) domain family member 1	1.14354	3.29e-45
ENSG00000224020	MIR181A2HG	MIR181A2 host gene (non-protein coding)	1.65726	2.98e-05
ENSG00000178662	CSRNP3	cysteine-serine-rich nuclear protein 3	1.54406	8.51e-31
ENSG00000124557	BTN1A1	butyrophilin, subfamily 1, member A1	2.85824	1.05e-07
ENSG00000241313	WWTR1-AS1	WWTR1 antisense RNA 1	1.01717	2.67e-12
ENSG00000149201	CCDC81	coiled-coil domain containing 81	1.49503	8.89e-06
ENSG00000180340	FZD2	frizzled family receptor 2	1.28948	9.73e-64
ENSG00000234377	POU4F1-AS1	POU4F1 antisense RNA 1	1.10432	0.00333708
ENSG00000104826	LHB	luteinizing hormone beta polypeptide	1.65915	4.25e-11
ENSG00000170262	MRAP	melanocortin 2 receptor accessory protein	2.16285	0.00800349
ENSG00000157992	KRTCAP3	keratinocyte associated protein 3	1.98873	5e-37
ENSG00000133398	MED10	mediator complex subunit 10	1.34806	1.57e-212
ENSG00000183128	CALHM3	calcium homeostasis modulator 3	3.19034	3.19e-10
ENSG00000169064	ZBBX	zinc finger, B-box domain containing	1.41074	1.39e-05
ENSG00000198792	TMEM184B	transmembrane protein 184B	1.29148	2.33e-162
ENSG00000101082	SLA2	Src-like-adaptor 2	1.3567	0.0120346
ENSG00000255874	LINC00346	long intergenic non-protein coding RNA 346	1.06284	0.000466887
ENSG00000102931	ARL2BP	ADP-ribosylation factor-like 2 binding protein	1.11804	6.16e-22
ENSG00000120708	TGFBI	transforming growth factor, beta-induced, 68kDa	4.06834	1.12e-135
ENSG00000074706	IPCEF1	interaction protein for cytohesin exchange factors 1	1.30469	0.0154325
ENSG00000179935	LINC00652	long intergenic non-protein coding RNA 652	1.08389	2.05e-05
ENSG00000110446	SLC15A3	solute carrier family 15, member 3	1.27013	0.000168938
ENSG00000135951	TSGA10	testis specific, 10	1.14502	5.25e-44
ENSG00000198515	CNGA1	cyclic nucleotide gated channel alpha 1	2.9806	6.01e-08
ENSG00000146856	AGBL3	ATP/GTP binding protein-like 3	1.68244	3.2e-30
ENSG00000129673	AANAT	aralkylamine N-acetyltransferase	1.3738	0.00115348
ENSG00000189221	MAOA	monoamine oxidase A	2.67849	1.19e-47
ENSG00000142528	ZNF473	zinc finger protein 473	1.3439	1.11e-208
ENSG00000063169	GLTSCR1	glioma tumor suppressor candidate region gene 1	1.12028	1.18e-68
ENSG00000182578	CSF1R	colony stimulating factor 1 receptor	3.15904	2.17e-45
ENSG00000231023	LINC00326	long intergenic non-protein coding RNA 326	3.7879	4.26e-13
ENSG00000101342	C20orf118	chromosome 20 open reading frame 118	1.33984	2.91e-06
ENSG00000160588	MPZL3	myelin protein zero-like 3	3.34245	2.9e-47
ENSG00000168405	CMAHP	cytidine monophospho-N-acetylneuraminic acid hydroxylase, pseudogene	1.87078	0.0207011
ENSG00000259673	IQCH-AS1	IQCH antisense RNA 1	1.72709	4.86e-25
ENSG00000235944	ZNF815P	zinc finger protein 815, pseudogene	1.21227	1.13e-20
ENSG00000170178	HOXD12	homeobox D12	1.88774	1.05e-17
ENSG00000165072	MAMDC2	MAM domain containing 2	1.09976	0.0017586
ENSG00000138483	CCDC54	coiled-coil domain containing 54	3.65383	9.38e-12
ENSG00000175793	SFN	stratifin	1.52282	0.00972286
ENSG00000185837	CECR5-AS1	CECR5 antisense RNA 1	1.05308	0.000337468
ENSG00000179943	FIZ1	FLT3-interacting zinc finger 1	1.01544	7.79e-71
ENSG00000188739	RBM34	RNA binding motif protein 34	1.1431	0.000164728
ENSG00000224586	GPX5	glutathione peroxidase 5 (epididymal androgen-related protein)	1.52785	0.016806
ENSG00000196166	C8orf86	chromosome 8 open reading frame 86	1.30999	0.00742727
ENSG00000179148	ALOXE3	arachidonate lipoxygenase 3	2.45058	1.06e-05
ENSG00000258790	KIAA0391	KIAA0391	1.5013	1.7e-06
ENSG00000162998	FRZB	frizzled-related protein	1.80398	1.57e-10
ENSG00000134256	CD101	CD101 molecule	2.08635	2.46e-24
ENSG00000229585	RPL21P44	ribosomal protein L21 pseudogene 44	1.40259	0.0183201
ENSG00000177337	DLGAP1-AS1	DLGAP1 antisense RNA 1	1.05826	7.71e-67
ENSG00000203740	METTL11B	methyltransferase like 11B	1.85055	0.00239842
ENSG00000196366	C9orf163	chromosome 9 open reading frame 163	1.55621	1.41e-09
ENSG00000169297	NR0B1	nuclear receptor subfamily 0, group B, member 1	2.01703	0.0020669
ENSG00000162631	NTNG1	netrin G1	2.12607	5.29e-07
ENSG00000176018	LYSMD3	LysM, putative peptidoglycan-binding, domain containing 3	1.31448	0.000111981
ENSG00000152592	DMP1	dentin matrix acidic phosphoprotein 1	2.60103	2.34e-06
ENSG00000172250	SERHL	serine hydrolase-like	1.44773	0.00100086
ENSG00000255398	HCAR3	hydroxycarboxylic acid receptor 3	2.11421	0.00183487
ENSG00000198821	CD247	CD247 molecule	2.2896	7.96e-10
ENSG00000105967	TFEC	transcription factor EC	1.85943	0.0151495
ENSG00000136197	C7orf25	chromosome 7 open reading frame 25	1.16592	1.09e-09
ENSG00000244588	RAD21L1	RAD21-like 1 (S. pombe)	5.05401	1.42e-34
ENSG00000116774	OLFML3	olfactomedin-like 3	1.89437	1.03e-27
ENSG00000105131	EPHX3	epoxide hydrolase 3	1.21327	0.00180755
ENSG00000101076	HNF4A	hepatocyte nuclear factor 4, alpha	1.55778	0.0393513
ENSG00000241560	ZBTB20-AS1	ZBTB20 antisense RNA 1	2.02433	0.00376488
ENSG00000136770	DNAJC1	DnaJ (Hsp40) homolog, subfamily C, member 1	1.02209	2.16e-92
ENSG00000177669	MBOAT4	membrane bound O-acyltransferase domain containing 4	1.52964	0.000394428
ENSG00000173261	PLAC8L1	PLAC8-like 1	1.88942	2.05e-07
ENSG00000158023	WDR66	WD repeat domain 66	1.45816	8.3e-44
ENSG00000124459	ZNF45	zinc finger protein 45	1.09225	1.61e-103
ENSG00000243926	TIPARP-AS1	TIPARP antisense RNA 1	1.56806	1.13e-06
ENSG00000178852	EFCAB13	EF-hand calcium binding domain 13	1.55568	8.67e-18
ENSG00000180066	C10orf91	chromosome 10 open reading frame 91	1.94172	0.00984093
ENSG00000141293	SKAP1	src kinase associated phosphoprotein 1	1.6927	1.09e-05
ENSG00000119326	CTNNAL1	catenin (cadherin-associated protein), alpha-like 1	1.18238	6.62e-69
ENSG00000164049	FBXW12	F-box and WD repeat domain containing 12	1.0909	0.00440399
ENSG00000253327	RAD21-AS1	RAD21 antisense RNA 1	1.27783	0.0254356
ENSG00000238835	SCARNA18	small Cajal body-specific RNA 18	2.35284	0.000947952
ENSG00000109667	SLC2A9	solute carrier family 2 (facilitated glucose transporter), member 9	3.37104	8.2e-48
ENSG00000226235	LEMD1-AS1	LEMD1 antisense RNA 1	1.37081	7.95e-05
ENSG00000149305	HTR3B	5-hydroxytryptamine (serotonin) receptor 3B, ionotropic	1.21478	0.0013705
ENSG00000108854	SMURF2	SMAD specific E3 ubiquitin protein ligase 2	2.14526	0
ENSG00000167807	FDX1L	ferredoxin 1-like	2.17394	5.6e-11
ENSG00000213693	SEC14L1P1	SEC14-like 1 pseudogene 1	1.98188	9.69e-31
ENSG00000111371	SLC38A1	solute carrier family 38, member 1	1.61078	0.0146314
ENSG00000231177	GHRLOS2	ghrelin opposite strand RNA 2 (non-protein coding)	2.82001	4.56e-17
ENSG00000206344	HCG27	HLA complex group 27 (non-protein coding)	2.96889	3.66e-22
ENSG00000100029	PES1	pescadillo ribosomal biogenesis factor 1	1.1582	3.71e-77
ENSG00000143257	NR1I3	nuclear receptor subfamily 1, group I, member 3	1.40692	2.89e-09
ENSG00000183347	GBP6	guanylate binding protein family, member 6	2.61952	9.3e-08
ENSG00000186466	AQP7P1	aquaporin 7 pseudogene 1	1.64985	0.039513
ENSG00000233338	TLR8-AS1	TLR8 antisense RNA 1	2.95354	6.55e-06
ENSG00000263006	ROCK1P1	Rho-associated, coiled-coil containing protein kinase 1 pseudogene 1	1.54197	0.0282684
ENSG00000204946	ZNF783	zinc finger family member 783	1.38903	4.74e-70
ENSG00000130812	ANGPTL6	angiopoietin-like 6	1.01862	1.11e-06
ENSG00000255650	FAM222A-AS1	FAM222A antisense RNA 1	1.70579	0.000698594
ENSG00000172175	MALT1	mucosa associated lymphoid tissue lymphoma translocation gene 1	1.56618	2.88e-138
ENSG00000144655	CSRNP1	cysteine-serine-rich nuclear protein 1	2.1382	1.59e-58
ENSG00000178562	CD28	CD28 molecule	1.76225	3.54e-08
ENSG00000265134	MIR3190	microRNA 3190	1.16418	0.0019866
ENSG00000176809	LRRC37A3	leucine rich repeat containing 37, member A3	1.35869	5.06e-20
ENSG00000003987	MTMR7	myotubularin related protein 7	1.03992	3.7e-11
ENSG00000135185	C7orf23	chromosome 7 open reading frame 23	1.00668	5.06e-27
ENSG00000187173	LCE2A	late cornified envelope 2A	1.72424	0.0427901
ENSG00000162779	AXDND1	axonemal dynein light chain domain containing 1	1.07881	0.00194397
ENSG00000240038	AMY2B	amylase, alpha 2B (pancreatic)	2.01986	3.5e-12
ENSG00000180878	C11orf42	chromosome 11 open reading frame 42	2.93733	8.69e-11
ENSG00000235568	NFAM1	NFAT activating protein with ITAM motif 1	1.08556	0.00531507
ENSG00000137090	DMRT1	doublesex and mab-3 related transcription factor 1	2.46743	0.000352247
ENSG00000212725	KRTAP2-1	keratin associated protein 2-1	6.74018	4.61e-41
ENSG00000250853	RNF138P1	ring finger protein 138, E3 ubiquitin protein ligase pseudogene 1	2.43343	0.00060656
ENSG00000160202	CRYAA	crystallin, alpha A	2.16021	0.00283174
ENSG00000171786	NHLH1	nescient helix loop helix 1	1.89784	3.27e-18
ENSG00000237738	RNF216-IT1	RNF216 intronic transcript 1 (non-protein coding)	1.60249	0.046234
ENSG00000263408	MIR4453	microRNA 4453	1.93937	1.85e-06
ENSG00000163864	NMNAT3	nicotinamide nucleotide adenylyltransferase 3	1.14463	0.0125982
ENSG00000203667	COX20	COX20 Cox2 chaperone homolog (S. cerevisiae)	1.1845	9.08e-37
ENSG00000204624	PTCHD2	patched domain containing 2	1.77181	0.000481537
ENSG00000077327	SPAG6	sperm associated antigen 6	1.17615	0.0220046
ENSG00000259954	IL21R-AS1	IL21R antisense RNA 1	1.25355	0.0188607
ENSG00000226017	PRICKLE2-AS3	PRICKLE2 antisense RNA 3	3.68393	1.57e-35
ENSG00000167644	C19orf33	chromosome 19 open reading frame 33	1.14482	0.0349565
ENSG00000154175	ABI3BP	ABI family, member 3 (NESH) binding protein	1.64404	1.13e-09
ENSG00000180347	CCDC129	coiled-coil domain containing 129	2.77596	0.000306563
ENSG00000203730	TEDDM1	transmembrane epididymal protein 1	2.62647	0.00074405
ENSG00000203801	LINC00222	long intergenic non-protein coding RNA 222	2.37897	0.000292797
ENSG00000214700	C12orf71	chromosome 12 open reading frame 71	1.36839	0.0342944
ENSG00000235408	SNORA71B		1.97463	9.51e-06
ENSG00000150722	PPP1R1C	protein phosphatase 1, regulatory (inhibitor) subunit 1C	3.21955	9.52e-17
ENSG00000206633	SNORA80B	small nucleolar RNA, H/ACA box 80B	1.70087	0.00835618
ENSG00000264049	MIR4737	microRNA 4737	1.43988	0.00760745
ENSG00000015592	STMN4	stathmin-like 4	1.921	0.0170159
ENSG00000163017	ACTG2	actin, gamma 2, smooth muscle, enteric	2.59955	8.91e-09
ENSG00000184564	SLITRK6	SLIT and NTRK-like family, member 6	5.34813	1.99e-20
ENSG00000214344	OR4F13P	olfactory receptor, family 4, subfamily F, member 13 pseudogene	1.53277	0.00131464
ENSG00000232560	C21orf37	chromosome 21 open reading frame 37	3.57601	5.87e-08
ENSG00000241127	YAE1D1	Yae1 domain containing 1	1.4161	8.06e-156
ENSG00000250722	SEPP1	selenoprotein P, plasma, 1	1.57898	1.14e-15
ENSG00000255867	DENND5B-AS1	DENND5B antisense RNA 1	1.37699	0.00479006
ENSG00000212452	SNORD69	small nucleolar RNA, C/D box 69	1.6234	2.33e-05
ENSG00000132010	ZNF20	zinc finger protein 20	1.34168	5.78e-08
ENSG00000168386	FILIP1L	filamin A interacting protein 1-like	1.55314	0.0149666
ENSG00000207944	MIR574	microRNA 574	1.504	0.0313322
ENSG00000198771	RCSD1	RCSD domain containing 1	1.69927	1.78e-06
ENSG00000162676	GFI1	growth factor independent 1 transcription repressor	1.16893	8.19e-05
ENSG00000152578	GRIA4	glutamate receptor, ionotropic, AMPA 4	1.38141	0.0192898
ENSG00000163825	RTP3	receptor (chemosensory) transporter protein 3	3.45789	2.86e-10
ENSG00000226312	CFLAR-AS1	CFLAR antisense RNA 1	2.85831	1.54e-08
ENSG00000164124	TMEM144	transmembrane protein 144	1.75882	5.75e-95
ENSG00000110079	MS4A4A	membrane-spanning 4-domains, subfamily A, member 4A	2.49136	0.00073649
ENSG00000132465	IGJ	immunoglobulin J polypeptide, linker protein for immunoglobulin alpha and mu polypeptides	1.80097	0.00227537
ENSG00000116819	TFAP2E	transcription factor AP-2 epsilon (activating enhancer binding protein 2 epsilon)	1.45554	5.2e-18
ENSG00000165887	ANKRD2	ankyrin repeat domain 2 (stretch responsive muscle)	1.32176	0.0356638
ENSG00000229020	AKR7A2P1	aldo-keto reductase family 7, member A2 pseudogene 1	1.13732	0.00175162
ENSG00000198105	ZNF248	zinc finger protein 248	1.3963	1.28e-100
ENSG00000252139	SCARNA18	small Cajal body-specific RNA 18	2.3193	2.36e-06
ENSG00000165953	SERPINA12	serpin peptidase inhibitor, clade A (alpha-1 antiproteinase, antitrypsin), member 12	1.91541	0.0125921
ENSG00000165837	FAM194B	family with sequence similarity 194, member B	1.16434	0.0105059
ENSG00000135218	CD36	CD36 molecule (thrombospondin receptor)	1.3741	0.000320831
ENSG00000238300	SNORD121B	small nucleolar RNA, C/D box 121B	1.38845	0.0345929
ENSG00000008517	IL32	interleukin 32	4.88944	1.4e-31
ENSG00000142871	CYR61	cysteine-rich, angiogenic inducer, 61	3.65681	0
ENSG00000159871	LYPD5	LY6/PLAUR domain containing 5	3.54581	3.76e-17
ENSG00000196387	ZNF140	zinc finger protein 140	1.10556	2.3e-80
ENSG00000114115	RBP1	retinol binding protein 1, cellular	1.20491	0.00823797
ENSG00000172215	CXCR6	chemokine (C-X-C motif) receptor 6	1.27053	0.00261912
ENSG00000226482	ADIPOQ-AS1	ADIPOQ antisense RNA 1	1.85603	0.00593354
ENSG00000107968	MAP3K8	mitogen-activated protein kinase kinase kinase 8	1.63432	1.2e-20
ENSG00000127920	GNG11	guanine nucleotide binding protein (G protein), gamma 11	1.19739	1.34e-193
ENSG00000221740	SNORD93	small nucleolar RNA, C/D box 93	2.84955	3.54e-08
ENSG00000198042	MAK16	MAK16 homolog (S. cerevisiae)	1.05459	2.99e-50
ENSG00000204655	MOG	myelin oligodendrocyte glycoprotein	1.27058	0.0333436
ENSG00000265917	MIR3685	microRNA 3685	1.58388	0.0175025
ENSG00000151364	KCTD14	potassium channel tetramerisation domain containing 14	1.40895	0.0378716
ENSG00000178125	PPP1R42	protein phosphatase 1, regulatory subunit 42	1.64096	0.00142905
ENSG00000112309	B3GAT2	beta-1,3-glucuronyltransferase 2 (glucuronosyltransferase S)	1.42887	7.81e-06
ENSG00000226763	SRRM5	serine/arginine repetitive matrix 5	3.20809	2.06e-47
ENSG00000113924	HGD	homogentisate 1,2-dioxygenase	2.00528	0.00160792
ENSG00000104783	KCNN4	potassium intermediate/small conductance calcium-activated channel, subfamily N, member 4	4.17497	5.42e-27
ENSG00000170236	USP50	ubiquitin specific peptidase 50	2.00505	0.000238015
ENSG00000171195	MUC7	mucin 7, secreted	2.26145	0.00332226
ENSG00000100365	NCF4	neutrophil cytosolic factor 4, 40kDa	1.89152	0.0190193
ENSG00000182902	SLC25A18	solute carrier family 25 (glutamate carrier), member 18	1.10975	1.57e-06
ENSG00000184162	NR2C2AP	nuclear receptor 2C2-associated protein	1.41671	1.18e-43
ENSG00000204688	OR2H1	olfactory receptor, family 2, subfamily H, member 1	2.04465	0.0096771
ENSG00000230314	ELOVL2-AS1	ELOVL2 antisense RNA 1	2.15844	0.00521181
ENSG00000262117	BCAR4	breast cancer anti-estrogen resistance 4 (non-protein coding)	2.21217	0.00410278
ENSG00000124134	KCNS1	potassium voltage-gated channel, delayed-rectifier, subfamily S, member 1	1.28836	0.000149602
ENSG00000251493	FOXD1	forkhead box D1	1.82734	3.74e-09
ENSG00000120337	TNFSF18	tumor necrosis factor (ligand) superfamily, member 18	2.19302	0.00711525
ENSG00000133115	STOML3	stomatin (EPB72)-like 3	3.56646	5.67e-07
ENSG00000145692	BHMT	betaine--homocysteine S-methyltransferase	1.73066	0.0419574
ENSG00000165325	CCDC67	coiled-coil domain containing 67	2.05298	0.0128133
ENSG00000185053	SGCZ	sarcoglycan, zeta	2.62482	0.000752213
ENSG00000186867	QRFPR	pyroglutamylated RFamide peptide receptor	1.97138	0.0177637
ENSG00000188817	SNTN	sentan, cilia apical structure protein	2.32514	0.00385662
ENSG00000201003	SNORA58	Small nucleolar RNA SNORA58	2.24106	0.0056071
ENSG00000204547	DEFB122	defensin, beta 122 (pseudogene)	1.68532	0.048403
ENSG00000212899	KRTAP3-3	keratin associated protein 3-3	1.84852	0.0280598

## Sheet: BRG1_10kb-bound_UP-Ontology
Category	Term	Count	%	PValue	Genes	List Total	Pop Hits	Pop Total	Fold Enrichment	Bonferroni	Benjamini	FDR
GOTERM_BP_FAT	GO:0006355~regulation of transcription, DNA-dependent	85	15.01766784452297	4.302296148247827E-6	ZNF582, HKR1, ZNF583, HOXD12, ANKRD1, SKAP1, TCEAL1, CITED2, ZNF181, S1PR1, ZNF300, HMOX1, ZNF248, ZNF146, ZNF546, ZNF45, ZNF643, PCBD2, ZNF284, SLA2, ARID5A, DMRT1, ZNF813, FOSB, CDK7, MECOM, ZFP28, NR0B1, MED10, ZNF140, ZNF718, HNF4A, ZNF783, MED16, ZNF717, MED8, ZNF136, TFAP2E, ZNF79, ZNF557, SRF, ZNF699, TSC22D1, LIF, NR1H2, TSC22D2, NPAS3, ZNF708, JUND, ZNF473, GBX2, ZNF471, GFI1, FOXD1, ZNF…	398	1773	13528	1.6295238176216673	0.00919451920976222	0.00919451920976222	0.007458017511641213
GOTERM_BP_FAT	GO:0051252~regulation of RNA metabolic process	86	15.19434628975265	5.599132797421521E-6	ZNF582, HKR1, ZNF583, HOXD12, ANKRD1, SKAP1, TCEAL1, CITED2, ZNF181, S1PR1, ZNF300, HMOX1, ZNF248, ZNF146, ZNF546, ZNF45, ZNF643, PCBD2, ZNF284, SLA2, ARID5A, DMRT1, ZNF813, FOSB, CDK7, MECOM, ZFP28, NR0B1, MED10, ZNF140, ZNF718, HNF4A, ZNF783, MED16, ZNF717, MED8, ZNF136, TFAP2E, CALCR, ZNF79, ZNF557, SRF, ZNF699, TSC22D1, LIF, NR1H2, TSC22D2, NPAS3, ZNF708, JUND, ZNF473, GBX2, ZNF471, GFI1, FOX…	398	1813	13528	1.6123197343584996	0.011949403754494159	0.005992657851308536	0.009705977158214196
GOTERM_BP_FAT	GO:0045449~regulation of transcription	111	19.6113074204947	1.9949831558588E-5	ZNF582, HKR1, ZNF583, HOXD12, ANKRD1, TCEAL1, CITED2, ZNF181, S1PR1, ZNF300, ZNF248, FIZ1, ZNF45, ZNF643, PCBD2, PCBD1, ZNF813, MECOM, NR0B1, MED10, KDM2A, HNF4A, MED16, ZNF783, TFAP2E, ZNF79, EID3, SRF, LIF, NR1H2, ZNF699, TFEC, JUND, KLF5, ZNF527, ZBTB49, MAP2K3, ZNF121, MAML1, KLF10, TAF7, MALT1, MAFK, ZNF526, ZNF215, NR1I3, ATF3, CSRNP3, ZNF212, HOXB7, PNRC2, CSRNP1, HOXB6, SMURF2, ZNF488, SK…	398	2601	13528	1.4505514887007123	0.04192835290701702	0.014176130692676203	0.034578553857533834
GOTERM_BP_FAT	GO:0050851~antigen receptor-mediated signaling pathway	8	1.4134275618374559	3.9245354184044826E-5	BCAR1, SLA2, CD247, MALT1, NFAM1, CACNB4, SKAP1, SYK	398	33	13528	8.239987817877266	0.08080907837080142	0.020845032368205785	0.0680122910355796
GOTERM_BP_FAT	GO:0010033~response to organic substance	41	7.243816254416961	7.96393156723002E-5	CALCR, CGA, ADCY5, BCAR1, GNG11, TLR6, SRF, GLRX2, AURKAPS1, TRIB1, IL12RB2, SLC2A8, HSPH1, HSPA2, HMOX1, AANAT, LOX, CYR61, TXNIP, PPP2R1A, IL6, SOCS2, GATM, KLF10, MALT1, RCAN1, NR0B1, IRS1, DDR1, NME1-NME2, ID2, HNF4A, HMGCS2, ID1, PTCH1, ID3, COL1A1, DNAJB4, EIF2AK3, PPP1R15A, PTAFR	398	721	13528	1.9328542852961061	0.15717203766256316	0.03362032524453851	0.13796959905983952
GOTERM_BP_FAT	GO:0001525~angiogenesis	15	2.65017667844523	1.1567641675180564E-4	RTN4, KLF5, IL8, SRF, SLIT2, ANGPTL6, S1PR1, NUS1, CTGF, ID1, HMOX1, GBX2, RHOB, ANGPTL4, CYR61	398	148	13528	3.4449273393997006	0.21993000988962152	0.04055018872619842	0.20034241465215485
GOTERM_BP_FAT	GO:0002429~immune response-activating cell surface receptor signaling pathway	8	1.4134275618374559	1.2140693785441919E-4	BCAR1, SLA2, CD247, MALT1, NFAM1, CACNB4, SKAP1, SYK	398	39	13528	6.972297384357686	0.2294698695021028	0.03655464018302623	0.21025738538139604
GOTERM_BP_FAT	GO:0002757~immune response-activating signal transduction	9	1.5901060070671376	1.244626872505596E-4	BCAR1, SLA2, CD247, MALT1, NFAM1, CACNB4, TLR6, SKAP1, SYK	398	52	13528	5.8828759180517975	0.23450915269851835	0.03285297487395766	0.21554407585672175
GOTERM_BP_FAT	GO:0002768~immune response-regulating cell surface receptor signaling pathway	8	1.4134275618374559	1.9742039881787864E-4	BCAR1, SLA2, CD247, MALT1, NFAM1, CACNB4, SKAP1, SYK	398	42	13528	6.4742761426178514	0.3455129246765406	0.04600837114658318	0.3416883963344497
GOTERM_BP_FAT	GO:0002764~immune response-regulating signal transduction	9	1.5901060070671376	2.1210914906640759E-4	BCAR1, SLA2, CD247, MALT1, NFAM1, CACNB4, TLR6, SKAP1, SYK	398	56	13528	5.462670495333811	0.36583534302926846	0.04452307446693404	0.36706715425730563
GOTERM_BP_FAT	GO:0006350~transcription	88	15.547703180212014	4.0046350030880024E-4	ZNF582, ZNF488, HKR1, ZNF583, HOXD12, TCEAL1, CITED2, ZNF181, ZNF300, ZNF248, SERTAD3, FIZ1, SERTAD1, ZNF546, ZNF45, ZNF643, ZNF284, SNAPC1, ARID5A, DMRT1, ZNF813, CDK7, ZBTB26, ZFP28, NR0B1, MED10, ZNF140, ZNF718, TAF13, KDM2A, HNF4A, ZNF783, MED16, ZNF717, MED8, ZNF136, TFAP2E, EID3, ZNF79, CCRN4L, GLIS2, ZNF557, SRF, ZNF699, TSC22D1, NR1H2, NPAS3, TFEC, ZNF708, JUND, ZNF473, GBX2, ZNF471, BCL9…	398	2101	13528	1.4236628167013077	0.5768240967389782	0.07520098766226546	0.6919605700497544
GOTERM_BP_FAT	GO:0001568~blood vessel development	18	3.180212014134275	9.201025999344928E-4	KLF5, RTN4, IL8, SRF, SLIT2, CITED2, ANGPTL6, S1PR1, NUS1, ID1, CTGF, HMOX1, GBX2, RHOB, LOX, COL1A1, CYR61, ANGPTL4	398	245	13528	2.4972207978668854	0.8614286125070358	0.15184974474199064	1.5831202153566148
GOTERM_BP_FAT	GO:0051789~response to protein stimulus	11	1.9434628975265018	0.0011812804642041324	DDR1, HSPH1, ID2, HSPA2, ID1, KLF10, ID3, DNAJB4, EIF2AK3, PPP1R15A, CYR61	398	107	13528	3.49429389940356	0.9209526567646795	0.17733674742001304	2.028178648868928
GOTERM_BP_FAT	GO:0001944~vasculature development	18	3.180212014134275	0.0011952209648127684	KLF5, RTN4, IL8, SRF, SLIT2, CITED2, ANGPTL6, S1PR1, NUS1, ID1, CTGF, HMOX1, GBX2, RHOB, LOX, COL1A1, CYR61, ANGPTL4	398	251	13528	2.4375262768023385	0.9232862399906407	0.16756929599343828	2.051880470679157
GOTERM_BP_FAT	GO:0048514~blood vessel morphogenesis	16	2.8268551236749118	0.0014307300179636777	KLF5, RTN4, IL8, SRF, SLIT2, CITED2, ANGPTL6, S1PR1, NUS1, CTGF, ID1, HMOX1, GBX2, RHOB, ANGPTL4, CYR61	398	211	13528	2.5774369477720356	0.9537630903099702	0.18529711670812077	2.4514802638329503
GOTERM_BP_FAT	GO:0048584~positive regulation of response to stimulus	17	3.0035335689045937	0.0016445523709628896	C7, IL6, IL8, CREB3, BCAR1, SLA2, CD247, MALT1, NFAM1, CACNB4, TLR6, SKAP1, IRS1, SLIT2, S1PR1, LAG3, SYK	398	236	13528	2.448428583595946	0.9708050772901022	0.19817109480172235	2.812952173510941
GOTERM_BP_FAT	GO:0002253~activation of immune response	10	1.76678445229682	0.0017375643447372225	C7, BCAR1, SLA2, CD247, MALT1, NFAM1, CACNB4, TLR6, SKAP1, SYK	398	94	13528	3.615952100930183	0.9760980550163173	0.197188250145787	2.969796917771095
GOTERM_BP_FAT	GO:0051098~regulation of binding	13	2.2968197879858656	0.001846379961581587	IL6, PCBD1, MALT1, NFAM1, NR0B1, TRIB1, HNF4A, ID2, NME1-NME2, ID1, HMOX1, ID3, EIF2AK3	398	153	13528	2.8880349459716887	0.9810857935972949	0.19783075558560603	3.1529883574368367
GOTERM_BP_FAT	GO:0043433~negative regulation of transcription factor activity	7	1.2367491166077738	0.0019020797189602816	HNF4A, ID2, ID1, HMOX1, ID3, NR0B1, TRIB1	398	45	13528	5.287325516471245	0.9832214486225944	0.193571209322962	3.2466329201915056
GOTERM_BP_FAT	GO:0015837~amine transport	11	1.9434628975265018	0.0024667315520287367	SLC36A1, SLC25A20, SLC1A5, TAF7, SERPINB7, SLC7A8, CACNB4, SLC38A1, SLC22A5, SLC43A1, SYK	398	118	13528	3.1685546375947538	0.9950214440438886	0.23289437093469678	4.191142659950864
GOTERM_BP_FAT	GO:0015804~neutral amino acid transport	5	0.88339222614841	0.0029416003430558476	SLC36A1, SLC1A5, SLC7A8, SLC38A1, SLC43A1	398	21	13528	8.092845178272315	0.9982088962019009	0.2600604750412603	4.97873675759446
GOTERM_BP_FAT	GO:0051101~regulation of DNA binding	11	1.9434628975265018	0.0029644377457811494	IL6, HNF4A, ID2, NME1-NME2, ID1, HMOX1, MALT1, NFAM1, ID3, NR0B1, TRIB1	398	121	13528	3.089995431703975	0.998294846813511	0.2515357459461507	5.016459566660581
GOTERM_BP_FAT	GO:0051090~regulation of transcription factor activity	10	1.76678445229682	0.003257254702446973	IL6, HNF4A, ID2, ID1, HMOX1, MALT1, NFAM1, ID3, NR0B1, TRIB1	398	103	13528	3.2999951212372545	0.9990924302732228	0.26254773629115324	5.498885697701916
GOTERM_BP_FAT	GO:0043392~negative regulation of DNA binding	7	1.2367491166077738	0.0036297155151014957	HNF4A, ID2, ID1, HMOX1, ID3, NR0B1, TRIB1	398	51	13528	4.665287220415804	0.99959319504493	0.2776886712090241	6.1091918950028745
GOTERM_BP_FAT	GO:0046942~carboxylic acid transport	12	2.1201413427561837	0.004047397558611164	SLC36A1, SLC25A20, SLC1A5, SLC17A5, SLC16A1, CD36, ANXA1, SLC7A8, CACNB4, SLC38A1, SLC22A5, SLC43A1	398	147	13528	2.77468977540765	0.9998346416490231	0.29410997430908514	6.789178103647364
GOTERM_BP_FAT	GO:0050852~T cell receptor signaling pathway	5	0.88339222614841	0.004155562287683685	BCAR1, CD247, MALT1, CACNB4, SKAP1	398	23	13528	7.389119510596461	0.9998690351637727	0.2909778606614313	6.9645122449426005
GOTERM_BP_FAT	GO:0015849~organic acid transport	12	2.1201413427561837	0.004260715500653922	SLC36A1, SLC25A20, SLC1A5, SLC17A5, SLC16A1, CD36, ANXA1, SLC7A8, CACNB4, SLC38A1, SLC22A5, SLC43A1	398	148	13528	2.7559418715197608	0.9998956019651398	0.28789479505829285	7.134666778248855
GOTERM_BP_FAT	GO:0044092~negative regulation of molecular function	20	3.53356890459364	0.004647421443189821	PPP2R1A, ADCY5, TAF7, SFN, NR0B1, CDC26, SPRY4, TRIB1, S1PR1, AKT1S1, ID2, HNF4A, ID1, HMOX1, PPP2R4, ID3, GFI1, GADD45B, GADD45A, ANGPTL4	398	334	13528	2.035326332260103	0.999954657779714	0.30035924563718963	7.7578993338329845
GOTERM_BP_FAT	GO:0001558~regulation of cell growth	14	2.4734982332155475	0.004811693968601292	RTN4, PPP2R1A, SOCS2, NOL8, BCAR1, SFN, N6AMT1, DDR1, HNF4A, CTGF, KAZALD1, SERTAD3, SERTAD1, CYR61	398	194	13528	2.452882971558825	0.9999681871756001	0.3002912285246869	8.021453689264412
GOTERM_BP_FAT	GO:0009725~response to hormone stimulus	21	3.7102473498233217	0.005984919126422376	CALCR, TXNIP, CGA, IL6, GATM, SOCS2, BCAR1, ADCY5, GNG11, RCAN1, NR0B1, SRF, IRS1, AURKAPS1, SLC2A8, HMGCS2, HMOX1, AANAT, PTCH1, LOX, COL1A1	398	367	13528	1.944929004696507	0.9999974723674645	0.34923558348948125	9.883216114204318
GOTERM_BP_FAT	GO:0051100~negative regulation of binding	7	1.2367491166077738	0.007468334111740595	HNF4A, ID2, ID1, HMOX1, ID3, NR0B1, TRIB1	398	59	13528	4.032705902393323	0.999999897631694	0.404993831285112	12.186397676915595
GOTERM_BP_FAT	GO:0042330~taxis	12	2.1201413427561837	0.007586317843087612	IL6, C5AR1, CREB3, IL8, CCL20, CXCL3, CMTM3, SLIT2, PTAFR, CYR61, CXCL10, SYK	398	160	13528	2.5492462311557786	0.9999999206915353	0.40006564035774606	12.36718013806728
GOTERM_BP_FAT	GO:0006935~chemotaxis	12	2.1201413427561837	0.007586317843087612	IL6, C5AR1, CREB3, IL8, CCL20, CXCL3, CMTM3, SLIT2, PTAFR, CYR61, CXCL10, SYK	398	160	13528	2.5492462311557786	0.9999999206915353	0.40006564035774606	12.36718013806728
GOTERM_BP_FAT	GO:0040017~positive regulation of locomotion	9	1.5901060070671376	0.008108414737110122	IL6, S1PR1, CREB3, IL8, BCAR1, FURIN, IRS1, SLIT2, CXCL10	398	98	13528	3.121525997333607	0.9999999743758109	0.41121180379635525	13.162969938053493
GOTERM_BP_FAT	GO:0019220~regulation of phosphate metabolic process	25	4.41696113074205	0.008916623911102938	CDK5R1, ADCY5, SFN, TLR6, SPRY4, TRIB1, LIF, AKT1S1, SERTAD1, SYK, PPP2R1A, IL6, C5AR1, MAP2K3, LRRN3, TAF7, RCAN1, MALT1, CDK7, IRS1, SPDYA, HNF4A, PPP2R4, GADD45B, GADD45A	398	485	13528	1.7520592653991607	0.999999995547732	0.4319716151136246	14.381440318081328
GOTERM_BP_FAT	GO:0051174~regulation of phosphorus metabolic process	25	4.41696113074205	0.008916623911102938	CDK5R1, ADCY5, SFN, TLR6, SPRY4, TRIB1, LIF, AKT1S1, SERTAD1, SYK, PPP2R1A, IL6, C5AR1, MAP2K3, LRRN3, TAF7, RCAN1, MALT1, CDK7, IRS1, SPDYA, HNF4A, PPP2R4, GADD45B, GADD45A	398	485	13528	1.7520592653991607	0.999999995547732	0.4319716151136246	14.381440318081328
GOTERM_BP_FAT	GO:0043549~regulation of kinase activity	20	3.53356890459364	0.009260423576519829	PPP2R1A, CDK5R1, C5AR1, MAP2K3, ADCY5, LRRN3, TAF7, MALT1, CDK7, SFN, TLR6, IRS1, SPRY4, TRIB1, SPDYA, AKT1S1, GADD45B, GADD45A, SERTAD1, SYK	398	357	13528	1.9041988654758386	0.9999999978861612	0.4348744918924242	14.894858761724494
GOTERM_BP_FAT	GO:0050921~positive regulation of chemotaxis	5	0.88339222614841	0.009708346094988624	IL6, S1PR1, CREB3, IL8, SLIT2	398	29	13528	5.860336163576503	0.9999999991993989	0.4411218677121511	15.55941930364969
GOTERM_BP_FAT	GO:0050778~positive regulation of immune response	11	1.9434628975265018	0.01043653504823247	C7, BCAR1, SLA2, CD247, MALT1, NFAM1, CACNB4, TLR6, SKAP1, LAG3, SYK	398	145	13528	2.5785479119736614	0.9999999998349854	0.45598771575026076	16.629370913482155
GOTERM_BP_FAT	GO:0040012~regulation of locomotion	13	2.2968197879858656	0.011202313893218189	RTN4, IL6, IL8, CREB3, BCAR1, IRS1, FURIN, SLIT2, CITED2, CXCL10, TRIB1, S1PR1, HMOX1	398	192	13528	2.3014028475711896	0.9999999999686905	0.470860184051512	17.74076554606254
GOTERM_BP_FAT	GO:0050920~regulation of chemotaxis	5	0.88339222614841	0.012285297070484915	IL6, S1PR1, CREB3, IL8, SLIT2	398	31	13528	5.482249959474794	0.9999999999970224	0.49364136731674935	19.288714240152448
GOTERM_BP_FAT	GO:0009611~response to wounding	26	4.593639575971731	0.013133964891705787	C7, TNC, CXCL3, TLR6, SRF, CXCL10, DYSF, CCL20, CTGF, HMOX1, PROZ, LOX, IL6, GATM, IL8, MAP2K3, LYZ, ANXA1, NFAM1, MECOM, TNFAIP6, CD36, HNF4A, ID3, PLA2G4C, PTAFR	398	530	13528	1.6674314971081825	0.9999999999995297	0.5081768121444701	20.482520014275842
GOTERM_BP_FAT	GO:0045859~regulation of protein kinase activity	19	3.356890459363958	0.013447552267628376	PPP2R1A, CDK5R1, C5AR1, MAP2K3, ADCY5, LRRN3, TAF7, MALT1, CDK7, SFN, TLR6, SPRY4, TRIB1, SPDYA, AKT1S1, GADD45B, GADD45A, SERTAD1, SYK	398	345	13528	1.87191027601777	0.9999999999997623	0.5078492799896424	20.919412458684594
GOTERM_BP_FAT	GO:0006469~negative regulation of protein kinase activity	8	1.4134275618374559	0.013907924153827654	PPP2R1A, AKT1S1, TAF7, SFN, GADD45B, GADD45A, SPRY4, TRIB1	398	87	13528	3.1255126205741353	0.9999999999999127	0.5112724727508815	21.556710161613523
GOTERM_BP_FAT	GO:0051338~regulation of transferase activity	20	3.53356890459364	0.013912645535085137	PPP2R1A, CDK5R1, C5AR1, MAP2K3, ADCY5, LRRN3, TAF7, MALT1, CDK7, SFN, TLR6, IRS1, SPRY4, TRIB1, SPDYA, AKT1S1, GADD45B, GADD45A, SERTAD1, SYK	398	372	13528	1.8274166531582645	0.9999999999999136	0.5031858221678243	21.563220877983714
GOTERM_BP_FAT	GO:0009719~response to endogenous stimulus	21	3.7102473498233217	0.016425542462337232	CALCR, TXNIP, CGA, IL6, GATM, SOCS2, BCAR1, ADCY5, GNG11, RCAN1, NR0B1, SRF, IRS1, AURKAPS1, SLC2A8, HMGCS2, HMOX1, AANAT, PTCH1, LOX, COL1A1	398	405	13528	1.7624418388237484	0.9999999999999997	0.5543169633200081	24.957140619777572
GOTERM_BP_FAT	GO:0033673~negative regulation of kinase activity	8	1.4134275618374559	0.0165151339071947	PPP2R1A, AKT1S1, TAF7, SFN, GADD45B, GADD45A, SPRY4, TRIB1	398	90	13528	3.021328866554997	0.9999999999999997	0.5482085144073271	25.07554941231226
GOTERM_BP_FAT	GO:0006865~amino acid transport	8	1.4134275618374559	0.0165151339071947	SLC36A1, SLC25A20, SLC1A5, SLC7A8, CACNB4, SLC38A1, SLC22A5, SLC43A1	398	90	13528	3.021328866554997	0.9999999999999997	0.5482085144073271	25.07554941231226
GOTERM_BP_FAT	GO:0048520~positive regulation of behavior	5	0.88339222614841	0.016907384815094663	IL6, S1PR1, CREB3, IL8, SLIT2	398	34	13528	4.998522021874076	0.9999999999999999	0.5488164616241391	25.59189921326116
GOTERM_BP_FAT	GO:0008283~cell proliferation	22	3.8869257950530036	0.018162590124866068	CDK5R1, PDXK, KLF10, BCAR1, MALT1, CDK7, SFN, FES, IL7R, FURIN, HMOX1, TGFBI, ZNF259, GBX2, TXNRD1, PTCH1, ID4, PES1, IFRD2, CSF1R, SYK, CYR61	398	436	13528	1.715089207505417	1.0	0.5671264645569976	27.221779823980107
GOTERM_BP_FAT	GO:0042325~regulation of phosphorylation	23	4.063604240282685	0.01948428506727544	PPP2R1A, IL6, CDK5R1, C5AR1, MAP2K3, ADCY5, LRRN3, TAF7, MALT1, CDK7, SFN, TLR6, IRS1, SPRY4, TRIB1, SPDYA, LIF, AKT1S1, HNF4A, GADD45B, GADD45A, SERTAD1, SYK	398	466	13528	1.677615545538853	1.0	0.5852661083934174	28.90160072612824
GOTERM_BP_FAT	GO:0030155~regulation of cell adhesion	10	1.76678445229682	0.019629774342002304	DDR1, PPP2R1A, CD36, S1PR1, IL8, TGFBI, DMP1, COL1A1, CITED2, CYR61	398	137	13528	2.4810182298353083	1.0	0.5804860746286193	29.084262782768235
GOTERM_BP_FAT	GO:0000079~regulation of cyclin-dependent protein kinase activity	6	1.0600706713780919	0.020687133933483638	SPDYA, CDK5R1, CDK7, SFN, GADD45A, SERTAD1	398	54	13528	3.7766610831937464	1.0	0.5924625697146986	30.398555285424766
GOTERM_BP_FAT	GO:0042035~regulation of cytokine biosynthetic process	7	1.2367491166077738	0.021340104640910094	IL6, HMOX1, MAP2K3, TLR6, LAG3, CD28, SYK	398	74	13528	3.215265516773054	1.0	0.5967106082826439	31.198694048718046
GOTERM_BP_FAT	GO:0019932~second-messenger-mediated signaling	14	2.4734982332155475	0.021558100240005637	CALCR, PPP2R1A, IL8, PTGER4, ADCY5, RCAN1, FZD2, AURKAPS1, S1PR1, CD36, CNR1, HIST1H4E, EIF2AK3, PTAFR	398	235	13528	2.0249331765209027	1.0	0.5933634110580998	31.463886412358587
GOTERM_BP_FAT	GO:0031214~biomineral formation	5	0.88339222614841	0.022487944534976784	HTN1, KLF10, DMP1, COL1A1, EIF2AK3	398	37	13528	4.593236452532935	1.0	0.6020277775671944	32.58426622830599
GOTERM_BP_FAT	GO:0051348~negative regulation of transferase activity	8	1.4134275618374559	0.02273296740579063	PPP2R1A, AKT1S1, TAF7, SFN, GADD45B, GADD45A, SPRY4, TRIB1	398	96	13528	2.83249581239531	1.0	0.5991940554896782	32.87661091732087
GOTERM_BP_FAT	GO:0006357~regulation of transcription from RNA polymerase II promoter	32	5.6537102473498235	0.0232811633018153	ANKRD1, SRF, TCEAL1, SKAP1, CITED2, LIF, NR1H2, S1PR1, HMOX1, JUND, GFI1, IL6, SLA2, KLF10, MAML1, TAF7, CDK7, FOSB, NR0B1, MECOM, MED10, ID2, HNF4A, CSRNP3, ID1, MED16, MED8, CSRNP1, ZNF136, ID4, ID3, TFAP2E	398	727	13528	1.4961188335072888	1.0	0.6013048437801043	33.526360643206246
GOTERM_BP_FAT	GO:0002684~positive regulation of immune system process	14	2.4734982332155475	0.02362893583879874	C7, IL6, BCAR1, SLA2, CD247, MALT1, NFAM1, CACNB4, IL7R, TLR6, SKAP1, LAG3, SYK, CD28	398	238	13528	1.9994088087496305	1.0	0.6002000925937572	33.935480882448665
GOTERM_BP_FAT	GO:0009612~response to mechanical stimulus	6	1.0600706713780919	0.023837392447138596	TXNIP, RCAN1, PTCH1, GFI1, COL1A1, COL11A1	398	56	13528	3.6417803302225407	1.0	0.5969722173119539	34.17957101994311
GOTERM_BP_FAT	GO:0045767~regulation of anti-apoptosis	5	0.88339222614841	0.024568924660122407	RTN4, IL6, HMOX1, CD28, PIK3R2	398	38	13528	4.472361809045227	1.0	0.6018126464557468	35.029444205677684
GOTERM_BP_FAT	GO:0010565~regulation of cellular ketone metabolic process	6	1.0600706713780919	0.025522184719972908	NR1H2, SLC25A20, HNF4A, BHMT, PRKAB1, IRS1	398	57	13528	3.577889447236181	1.0	0.6096866543147172	36.121403972420715
GOTERM_BP_FAT	GO:0050853~B cell receptor signaling pathway	3	0.5300353356890459	0.02697900499673394	BCAR1, NFAM1, SYK	398	9	13528	11.329983249581238	1.0	0.6241858533510348	37.75683747413867
GOTERM_BP_FAT	GO:0030334~regulation of cell migration	11	1.9434628975265018	0.027449835160098177	RTN4, IL6, S1PR1, CREB3, HMOX1, BCAR1, FURIN, IRS1, CITED2, TRIB1, CXCL10	398	169	13528	2.2123635931134964	1.0	0.6245583515559237	38.27690110139446
GOTERM_BP_FAT	GO:0015807~L-amino acid transport	4	0.7067137809187279	0.028743618183976357	SLC36A1, SLC7A8, CACNB4, SLC43A1	398	23	13528	5.911295608477169	1.0	0.6357624551551104	39.68496740994998
GOTERM_BP_FAT	GO:0007626~locomotory behavior	15	2.65017667844523	0.03180958280411209	IL6, C5AR1, IL8, CREB3, CXCL3, CACNB4, SLIT2, CXCL10, NPAS3, CCL20, SEPP1, CMTM3, PTAFR, CYR61, SYK	398	274	13528	1.8607636723764809	1.0	0.6676832051260446	42.901856737509206
GOTERM_BP_FAT	GO:0030198~extracellular matrix organization	8	1.4134275618374559	0.033308425016148155	MPZL3, KAZALD1, TGFBI, DMP1, COL1A1, LOX, COL11A1, CYR61	398	104	13528	2.614611519134132	1.0	0.679036130300877	44.41497482592376
GOTERM_BP_FAT	GO:0051094~positive regulation of developmental process	15	2.65017667844523	0.03525365103399012	ZNF488, IL6, KLF10, IL7R, SRF, SLIT2, LIF, CD36, ID2, NME1-NME2, JUND, RHOB, GFI1, SYK, ANGPTL4	398	278	13528	1.8339900943566754	1.0	0.6943994398863624	46.32243373728188
GOTERM_BP_FAT	GO:0045597~positive regulation of cell differentiation	13	2.2968197879858656	0.03806449401723352	ZNF488, IL6, KLF10, IL7R, SRF, SLIT2, LIF, CD36, ID2, NME1-NME2, JUND, GFI1, SYK	398	229	13528	1.9295604660858883	1.0	0.7170349370359973	48.970023127530894
GOTERM_BP_FAT	GO:0043534~blood vessel endothelial cell migration	3	0.5300353356890459	0.03965767063267807	ID1, SRF, SLIT2	398	11	13528	9.269986295111922	1.0	0.7265692165963511	50.415518592276406
GOTERM_BP_FAT	GO:0010810~regulation of cell-substrate adhesion	5	0.88339222614841	0.04533093824718003	DDR1, CD36, DMP1, COL1A1, CYR61	398	46	13528	3.6945597552982306	1.0	0.7688556304280774	55.255726825708166
GOTERM_BP_FAT	GO:0050795~regulation of behavior	5	0.88339222614841	0.04533093824718003	IL6, S1PR1, CREB3, IL8, SLIT2	398	46	13528	3.6945597552982306	1.0	0.7688556304280774	55.255726825708166
GOTERM_BP_FAT	GO:0007167~enzyme linked receptor protein signaling pathway	17	3.0035335689045937	0.04534792364019134	TXNIP, SOCS2, KLF10, BCAR1, IRS1, EPHA2, SLC2A8, LIF, DDR1, CTGF, ID1, CSRNP1, ARF4, SMURF2, EIF2AK3, CSF1R, SYK	398	342	13528	1.6895589056393077	1.0	0.7640271877243202	55.26952543941894
GOTERM_BP_FAT	GO:0030335~positive regulation of cell migration	7	1.2367491166077738	0.04670234269090627	IL6, S1PR1, CREB3, BCAR1, FURIN, IRS1, CXCL10	398	89	13528	2.6733668341708543	1.0	0.7693734981857904	56.35701349957025
GOTERM_BP_FAT	GO:0010557~positive regulation of macromolecule biosynthetic process	28	4.946996466431095	0.04696369386175217	GLIS2, TLR6, SRF, SKAP1, CITED2, LIF, NR1H2, S1PR1, HMOX1, SERTAD3, SERTAD1, SYK, CD28, KLF5, IL6, PCBD2, PCBD1, MAP2K3, MAML1, TAF7, CREB5, CDK7, MECOM, IRS1, HNF4A, CSRNP3, CSRNP1, TFAP2E	398	654	13528	1.4552272063682326	1.0	0.7665029482547931	56.563968788321304
GOTERM_BP_FAT	GO:0031328~positive regulation of cellular biosynthetic process	29	5.123674911660777	0.04851045163033653	GLIS2, TLR6, SRF, SKAP1, CITED2, LIF, NR1H2, S1PR1, HMOX1, SERTAD3, HBB, SERTAD1, SYK, CD28, KLF5, IL6, PCBD2, PCBD1, MAP2K3, MAML1, TAF7, CREB5, CDK7, MECOM, IRS1, HNF4A, CSRNP3, CSRNP1, TFAP2E	398	685	13528	1.4389905733044785	1.0	0.7730030938029936	57.76998710942299
GOTERM_BP_FAT	GO:0043062~extracellular structure organization	10	1.76678445229682	0.0510745050625704	MPZL3, TNC, KAZALD1, TGFBI, DMP1, CACNB4, COL1A1, LOX, COL11A1, CYR61	398	163	13528	2.0852729907204735	1.0	0.7860192666926358	59.699955497974024
GOTERM_BP_FAT	GO:0006955~immune response	29	5.123674911660777	0.051571703933770315	C7, CXCL3, IFI44L, IL32, TLR6, IL7R, SKAP1, TNFSF18, TAPBP, CXCL10, LIF, CCL20, CD28, IL6, GBP6, C5AR1, IL8, PTGER4, NCF4, SLA2, IGJ, MALT1, MARCH8, CNGA1, ITGAD, PTAFR, LCP1, GBP2, GBP1	398	690	13528	1.4285631053819823	1.0	0.7848111207108421	60.06444439249932
GOTERM_BP_FAT	GO:0007229~integrin-mediated signaling pathway	6	1.0600706713780919	0.054448662206233275	CTGF, BCAR1, ITGAD, ADAMTS1, COL16A1, SYK	398	70	13528	2.9134242641780332	1.0	0.7986526830415843	62.11324964900151
GOTERM_BP_FAT	GO:0019217~regulation of fatty acid metabolic process	5	0.88339222614841	0.05502305562719376	NR1H2, SLC25A20, HNF4A, PRKAB1, IRS1	398	49	13528	3.4683622192595633	1.0	0.7978613977298539	62.510255194872634
GOTERM_BP_FAT	GO:0009891~positive regulation of biosynthetic process	29	5.123674911660777	0.055965754895561486	GLIS2, TLR6, SRF, SKAP1, CITED2, LIF, NR1H2, S1PR1, HMOX1, SERTAD3, HBB, SERTAD1, SYK, CD28, KLF5, IL6, PCBD2, PCBD1, MAP2K3, MAML1, TAF7, CREB5, CDK7, MECOM, IRS1, HNF4A, CSRNP3, CSRNP1, TFAP2E	398	695	13528	1.4182856729691622	1.0	0.7992847020146518	63.153339272245056
GOTERM_BP_FAT	GO:0006954~inflammatory response	16	2.8268551236749118	0.056658235049046324	C7, IL6, IL8, MAP2K3, CXCL3, ANXA1, LYZ, NFAM1, MECOM, TLR6, CXCL10, TNFAIP6, CCL20, HMOX1, PLA2G4C, PTAFR	398	325	13528	1.6733513722458444	1.0	0.7992064726023379	63.61909267108683
GOTERM_BP_FAT	GO:0048545~response to steroid hormone stimulus	11	1.9434628975265018	0.05691177267247971	TXNIP, CALCR, IL6, SOCS2, HMOX1, AANAT, RCAN1, PTCH1, COL1A1, LOX, AURKAPS1	398	192	13528	1.9473408710217757	1.0	0.7965756107217042	63.788227141795
GOTERM_BP_FAT	GO:0030182~neuron differentiation	20	3.53356890459364	0.05771127070135399	CDK5R1, IL6, PTPRZ1, NTN4, NTNG1, PIP5K1C, SRF, EPHA2, SLIT2, ALCAM, LIF, S1PR1, MAP1S, MAP2, GBX2, SEMA3B, ID4, ID3, GFI1, SLITRK6	398	438	13528	1.5520524999426355	1.0	0.7971556069191204	64.31673165551469
GOTERM_BP_FAT	GO:0015718~monocarboxylic acid transport	5	0.88339222614841	0.0584831311451612	SLC25A20, SLC17A5, SLC16A1, CD36, ANXA1	398	50	13528	3.398994974874372	1.0	0.7975661001338931	64.82006368681978
GOTERM_BP_FAT	GO:0051270~regulation of cell motion	11	1.9434628975265018	0.05853151550881401	RTN4, IL6, S1PR1, CREB3, HMOX1, BCAR1, FURIN, IRS1, CITED2, TRIB1, CXCL10	398	193	13528	1.937251021949124	1.0	0.7938616342420326	64.85139135380639
GOTERM_BP_FAT	GO:0042509~regulation of tyrosine phosphorylation of STAT protein	4	0.7067137809187279	0.06152756973418223	LIF, PPP2R1A, IL6, HNF4A	398	31	13528	4.385799967579835	1.0	0.8065296276706625	66.74085714571227
GOTERM_BP_FAT	GO:0051726~regulation of cell cycle	16	2.8268551236749118	0.06422364461520909	CDK5R1, CREB3, CDK7, SFN, CITED2, SPDYA, LIF, HNF4A, ID2, RHOB, ID3, GADD45B, PES1, GADD45A, SERTAD1, CD28	398	331	13528	1.643018718972506	1.0	0.8166960712919742	68.35893512480736
GOTERM_BP_FAT	GO:0043086~negative regulation of catalytic activity	14	2.4734982332155475	0.06540141670012688	PPP2R1A, ADCY5, TAF7, SFN, CDC26, SPRY4, TRIB1, S1PR1, AKT1S1, PPP2R4, GFI1, GADD45B, GADD45A, ANGPTL4	398	277	13528	1.7179035974094299	1.0	0.8188555432229544	69.04224841795177
GOTERM_BP_FAT	GO:0007169~transmembrane receptor protein tyrosine kinase signaling pathway	12	2.1201413427561837	0.06658923523605563	TXNIP, SLC2A8, DDR1, SOCS2, CTGF, CSRNP1, BCAR1, ARF4, EIF2AK3, IRS1, EPHA2, CSF1R	398	224	13528	1.8208901651112703	1.0	0.8209954371819866	69.71728970644044
GOTERM_BP_FAT	GO:0007242~intracellular signaling cascade	47	8.303886925795052	0.0679073674614031	CALCR, ADCY5, GNG11, SFN, TLR6, AURKAPS1, TRIB1, NR1H2, S1PR1, CTGF, HMOX1, CNR1, HIST1H4E, RHOB, RHOC, MAP2K7, SYK, ARL1, PPP2R1A, C5AR1, PTGER4, IL8, SOCS2, MAP2K3, SLA2, TAF7, LRRN3, STMN4, DMRT1, MALT1, RCAN1, CDK7, FZD2, NFAM1, IRS1, CD36, MED16, ROCK1P1, RASSF1, ARF4, PLA2G4C, GADD45B, EIF2AK3, PHLDB2, PTAFR, NKIRAS2, ARL4A	398	1256	13528	1.2719169093877027	1.0	0.8236781459297013	70.45014339724189
GOTERM_BP_FAT	GO:0051272~positive regulation of cell motion	7	1.2367491166077738	0.06829613248519607	IL6, S1PR1, CREB3, BCAR1, FURIN, IRS1, CXCL10	398	98	13528	2.427853553481694	1.0	0.8219874832245807	70.6630763978706
GOTERM_BP_FAT	GO:0048872~homeostasis of number of cells	7	1.2367491166077738	0.07376565887075515	IL6, ID2, HMOX1, HOXB6, SLC22A5, MECOM, IL7R	398	100	13528	2.3792964824120606	1.0	0.8425335837625256	73.50968284138989
GOTERM_BP_FAT	GO:0002697~regulation of immune effector process	7	1.2367491166077738	0.07659166328806673	IL6, HMOX1, MALT1, IL7R, LAG3, CD28, SYK	398	101	13528	2.3557390914970893	1.0	0.8505659174039444	74.87643166389155
GOTERM_BP_FAT	GO:0040008~regulation of growth	16	2.8268551236749118	0.07789412147830305	RTN4, CGA, PPP2R1A, SOCS2, NOL8, BCAR1, SFN, N6AMT1, DDR1, HNF4A, CTGF, KAZALD1, SERTAD3, PTCH1, SERTAD1, CYR61	398	341	13528	1.5948363518472126	1.0	0.8524093398831869	75.48371815538688
GOTERM_BP_FAT	GO:0043434~response to peptide hormone stimulus	9	1.5901060070671376	0.08392998784176292	SLC2A8, SOCS2, GATM, HMGCS2, BCAR1, AANAT, COL1A1, NR0B1, IRS1	398	154	13528	1.9864256346668407	1.0	0.8707201177474514	78.12181037987224
GOTERM_BP_FAT	GO:0035067~negative regulation of histone acetylation	2	0.35335689045936397	0.08548736935260348	SET, TAF7	398	3	13528	22.65996649916248	1.0	0.8729353439329992	78.75772106402721
GOTERM_BP_FAT	GO:0050900~leukocyte migration	5	0.88339222614841	0.08582357670382756	IL6, IL8, ROCK1P1, CXCL3, SYK	398	57	13528	2.9815745393634843	1.0	0.8712020365168105	78.89269607433312
GOTERM_BP_FAT	GO:0001817~regulation of cytokine production	10	1.76678445229682	0.08584400612606684	IL6, HMOX1, MAP2K3, MALT1, NFAM1, TLR6, FURIN, LAG3, CD28, SYK	398	181	13528	1.8778977761736864	1.0	0.8684596381595255	78.90087164205883
GOTERM_BP_FAT	GO:0042516~regulation of tyrosine phosphorylation of Stat3 protein	3	0.5300353356890459	0.08744759366370473	LIF, PPP2R1A, IL6	398	17	13528	5.998226426248891	1.0	0.8708237765051359	79.53337673939305
GOTERM_BP_FAT	GO:0051004~regulation of lipoprotein lipase activity	3	0.5300353356890459	0.08744759366370473	NR1H2, PPP2R4, ANGPTL4	398	17	13528	5.998226426248891	1.0	0.8708237765051359	79.53337673939305
GOTERM_BP_FAT	GO:0046425~regulation of JAK-STAT cascade	4	0.7067137809187279	0.0879655887664103	LIF, PPP2R1A, IL6, HNF4A	398	36	13528	3.7766610831937464	1.0	0.8697170385442237	79.73384242559635
GOTERM_BP_FAT	GO:0030595~leukocyte chemotaxis	4	0.7067137809187279	0.0937430279632815	IL6, IL8, CXCL3, SYK	398	37	13528	3.674589162026348	1.0	0.8842673676786814	81.84787075761555
GOTERM_BP_FAT	GO:0018130~heterocycle biosynthetic process	5	0.88339222614841	0.09459960381610821	MTHFD2L, ALDH18A1, PCBD2, PCBD1, AANAT	398	59	13528	2.8805042159952308	1.0	0.884119729896343	82.14301267504814
GOTERM_BP_FAT	GO:0002763~positive regulation of myeloid leukocyte differentiation	3	0.5300353356890459	0.0965349640188182	LIF, ID2, KLF10	398	18	13528	5.664991624790619	1.0	0.8869119577204465	82.79329495499528
GOTERM_BP_FAT	GO:0030593~neutrophil chemotaxis	3	0.5300353356890459	0.0965349640188182	IL8, CXCL3, SYK	398	18	13528	5.664991624790619	1.0	0.8869119577204465	82.79329495499528
GOTERM_BP_FAT	GO:0007610~behavior	20	3.53356890459364	0.09798871736079204	IL6, C5AR1, IL8, CREB3, CXCL3, MAOA, CACNB4, FOSB, SLIT2, CXCL10, NPAS3, CCL20, CNR1, GFI1, SEPP1, CMTM3, DYNLRB1, PTAFR, CYR61, SYK	398	469	13528	1.4494648080487729	1.0	0.8883337902441667	83.26700993017623

## Sheet: BRG1_30bound_Down-List
Ensembl gene id	Gene name	Description	Average log2 change (shBRG1/shScramble)	Adjusted p-value
ENSG00000004799	PDK4	pyruvate dehydrogenase kinase, isozyme 4	-1.80311	0
ENSG00000018236	CNTN1	contactin 1	-3.20543	2.28e-239
ENSG00000019549	SNAI2	snail homolog 2 (Drosophila)	-2.58691	0
ENSG00000026508	CD44	CD44 molecule (Indian blood group)	-2.61046	2.99e-18
ENSG00000033627	ATP6V0A1	ATPase, H+ transporting, lysosomal V0 subunit a1	-1.16254	6.06e-217
ENSG00000044524	EPHA3	EPH receptor A3	-1.56017	9.69e-39
ENSG00000055163	CYFIP2	cytoplasmic FMR1 interacting protein 2	-1.20786	7.67e-77
ENSG00000057704	TMCC3	transmembrane and coiled-coil domain family 3	-3.08247	0
ENSG00000058453	CROCC	ciliary rootlet coiled-coil, rootletin	-1.97327	0
ENSG00000058668	ATP2B4	ATPase, Ca++ transporting, plasma membrane 4	-1.0469	1.2e-56
ENSG00000065361	ERBB3	v-erb-b2 erythroblastic leukemia viral oncogene homolog 3 (avian)	-1.23154	4.02e-18
ENSG00000075651	PLD1	phospholipase D1, phosphatidylcholine-specific	-3.03041	0
ENSG00000076864	RAP1GAP	RAP1 GTPase activating protein	-1.34167	1.68e-36
ENSG00000078098	FAP	fibroblast activation protein, alpha	-1.54996	9.83e-18
ENSG00000079385	CEACAM1	carcinoembryonic antigen-related cell adhesion molecule 1 (biliary glycoprotein)	-3.60523	3.31e-258
ENSG00000079931	MOXD1	monooxygenase, DBH-like 1	-2.69824	0
ENSG00000080166	DCT	dopachrome tautomerase (dopachrome delta-isomerase, tyrosine-related protein 2)	-5.00238	3.18e-190
ENSG00000086991	NOX4	NADPH oxidase 4	-4.61881	0
ENSG00000088882	CPXM1	carboxypeptidase X (M14 family), member 1	-4.88801	0
ENSG00000089041	P2RX7	purinergic receptor P2X, ligand-gated ion channel, 7	-2.77447	8.34e-106
ENSG00000092621	PHGDH	phosphoglycerate dehydrogenase	-1.47957	1.1e-71
ENSG00000096696	DSP	desmoplakin	-1.79566	7.78e-30
ENSG00000100097	LGALS1	lectin, galactoside-binding, soluble, 1	-1.39971	1.17e-44
ENSG00000100234	TIMP3	TIMP metallopeptidase inhibitor 3	-1.35619	1.62e-43
ENSG00000101197	BIRC7	baculoviral IAP repeat containing 7	-2.88293	0
ENSG00000103175	WFDC1	WAP four-disulfide core domain 1	-1.33996	1.91e-07
ENSG00000103381	CPPED1	calcineurin-like phosphoesterase domain containing 1	-1.42464	1.67e-139
ENSG00000103544	C16orf62	chromosome 16 open reading frame 62	-1.1302	7.26e-92
ENSG00000103994	ZFP106	zinc finger protein 106 homolog (mouse)	-1.75751	3.86e-298
ENSG00000104044	OCA2	oculocutaneous albinism II	-4.01373	0
ENSG00000104332	SFRP1	secreted frizzled-related protein 1	-4.39033	7.69e-35
ENSG00000104490	NCALD	neurocalcin delta	-3.24825	0
ENSG00000105559	PLEKHA4	pleckstrin homology domain containing, family A (phosphoinositide binding specific) member 4	-1.20881	1.85e-121
ENSG00000106624	AEBP1	AE binding protein 1	-3.83487	0
ENSG00000106772	PRUNE2	prune homolog 2 (Drosophila)	-3.08978	3.04e-201
ENSG00000107165	TYRP1	tyrosinase-related protein 1	-4.04758	0
ENSG00000107518	ATRNL1	attractin-like 1	-2.53199	2.47e-274
ENSG00000108828	VAT1	vesicle amine transport protein 1 homolog (T. californica)	-1.58128	0
ENSG00000109819	PPARGC1A	peroxisome proliferator-activated receptor gamma, coactivator 1 alpha	-3.3961	7.21e-203
ENSG00000111275	ALDH2	aldehyde dehydrogenase 2 family (mitochondrial)	-2.79297	0
ENSG00000112414	GPR126	G protein-coupled receptor 126	-1.55477	1.35e-50
ENSG00000115415	STAT1	signal transducer and activator of transcription 1, 91kDa	-1.64872	1.2e-123
ENSG00000115457	IGFBP2	insulin-like growth factor binding protein 2, 36kDa	-2.05574	7.37e-300
ENSG00000115561	CHMP3	charged multivesicular body protein 3	-1.03025	1.65e-81
ENSG00000115902	SLC1A4	solute carrier family 1 (glutamate/neutral amino acid transporter), member 4	-3.88332	0
ENSG00000115935	WIPF1	WAS/WASL interacting protein family, member 1	-1.69432	3.63e-76
ENSG00000116679	IVNS1ABP	influenza virus NS1A binding protein	-1.23567	4.97e-232
ENSG00000118503	TNFAIP3	tumor necrosis factor, alpha-induced protein 3	-1.41815	0
ENSG00000119508	NR4A3	nuclear receptor subfamily 4, group A, member 3	-1.56802	2.6e-180
ENSG00000119655	NPC2	Niemann-Pick disease, type C2	-1.44885	0
ENSG00000122729	ACO1	aconitase 1, soluble	-1.6464	0
ENSG00000123560	PLP1	proteolipid protein 1	-2.32649	6.71e-114
ENSG00000124608	AARS2	alanyl-tRNA synthetase 2, mitochondrial (putative)	-1.16775	0
ENSG00000126217	MCF2L	MCF.2 cell line derived transforming sequence-like	-1.39107	2.22e-67
ENSG00000126709	IFI6	interferon, alpha-inducible protein 6	-1.43111	3.22e-51
ENSG00000128487	SPECC1	sperm antigen with calponin homology and coiled-coil domains 1	-1.2493	1.87e-110
ENSG00000128564	VGF	VGF nerve growth factor inducible	-2.01827	1.6e-277
ENSG00000128596	CCDC136	coiled-coil domain containing 136	-2.40319	1.73e-183
ENSG00000129657	SEC14L1	SEC14-like 1 (S. cerevisiae)	-1.07877	1.18e-150
ENSG00000130396	MLLT4	myeloid/lymphoid or mixed-lineage leukemia (trithorax homolog, Drosophila); translocated to, 4	-1.94581	5.54e-203
ENSG00000131634	TMEM204	transmembrane protein 204	-1.84315	2.27e-243
ENSG00000132185	FCRLA	Fc receptor-like A	-2.53973	2.23e-182
ENSG00000132688	NES	nestin	-2.29086	1.17e-153
ENSG00000133195	SLC39A11	solute carrier family 39 (metal ion transporter), member 11	-2.04495	0
ENSG00000134121	CHL1	cell adhesion molecule with homology to L1CAM (close homolog of L1)	-3.38701	0
ENSG00000134574	DDB2	damage-specific DNA binding protein 2, 48kDa	-1.16378	3.68e-34
ENSG00000134802	SLC43A3	solute carrier family 43, member 3	-1.68804	8.51e-31
ENSG00000135914	HTR2B	5-hydroxytryptamine (serotonin) receptor 2B, G protein-coupled	-1.70771	1.19e-12
ENSG00000136732	GYPC	glycophorin C (Gerbich blood group)	-1.10438	4.31e-42
ENSG00000137571	SLCO5A1	solute carrier organic anion transporter family, member 5A1	-2.61084	2.75e-298
ENSG00000138613	APH1B	anterior pharynx defective 1 homolog B (C. elegans)	-1.8987	3.33e-97
ENSG00000140443	IGF1R	insulin-like growth factor 1 receptor	-1.58237	0
ENSG00000141424	SLC39A6	solute carrier family 39 (zinc transporter), member 6	-2.79303	0
ENSG00000142089	IFITM3	interferon induced transmembrane protein 3	-1.41991	2.3e-60
ENSG00000142156	COL6A1	collagen, type VI, alpha 1	-2.47419	9.52e-199
ENSG00000143153	ATP1B1	ATPase, Na+/K+ transporting, beta 1 polypeptide	-1.9449	0
ENSG00000143653	SCCPDH	saccharopine dehydrogenase (putative)	-1.31661	3.7e-12
ENSG00000143772	ITPKB	inositol-trisphosphate 3-kinase B	-2.74742	0
ENSG00000144668	ITGA9	integrin, alpha 9	-2.63935	3.35e-101
ENSG00000146966	DENND2A	DENN/MADD domain containing 2A	-2.40204	2.63e-251
ENSG00000147439	BIN3	bridging integrator 3	-1.03977	2.86e-119
ENSG00000147650	LRP12	low density lipoprotein receptor-related protein 12	-1.03958	5.94e-122
ENSG00000150625	GPM6A	glycoprotein M6A	-1.18046	1.89e-87
ENSG00000151692	RNF144A	ring finger protein 144A	-2.08645	7.87e-292
ENSG00000152078	TMEM56	transmembrane protein 56	-1.77851	1.85e-93
ENSG00000154856	APCDD1	adenomatosis polyposis coli down-regulated 1	-2.467	0
ENSG00000156535	CD109	CD109 molecule	-1.81449	1.29e-82
ENSG00000157601	MX1	myxovirus (influenza virus) resistance 1, interferon-inducible protein p78 (mouse)	-1.64277	3.18e-45
ENSG00000157827	FMNL2	formin-like 2	-1.342	2.99e-96
ENSG00000162745	OLFML2B	olfactomedin-like 2B	-2.06172	2.01e-08
ENSG00000162777	DENND2D	DENN/MADD domain containing 2D	-4.12892	0
ENSG00000163171	CDC42EP3	CDC42 effector protein (Rho GTPase binding) 3	-1.57559	2.03e-72
ENSG00000163430	FSTL1	follistatin-like 1	-4.3917	0
ENSG00000163513	TGFBR2	transforming growth factor, beta receptor II (70/80kDa)	-1.46941	2.13e-130
ENSG00000163599	CTLA4	cytotoxic T-lymphocyte-associated protein 4	-3.9777	0
ENSG00000163820	FYCO1	FYVE and coiled-coil domain containing 1	-1.73533	1.99e-157
ENSG00000164120	HPGD	hydroxyprostaglandin dehydrogenase 15-(NAD)	-3.01575	1.2e-238
ENSG00000164175	SLC45A2	solute carrier family 45, member 2	-2.4158	7.36e-261
ENSG00000164684	ZNF704	zinc finger protein 704	-1.41188	5.41e-153
ENSG00000165716	FAM69B	family with sequence similarity 69, member B	-3.04775	0
ENSG00000166340	TPP1	tripeptidyl peptidase I	-1.04192	0
ENSG00000167106	FAM102A	family with sequence similarity 102, member A	-1.10812	2.84e-118
ENSG00000168297	PXK	PX domain containing serine/threonine kinase	-1.4236	1.62e-119
ENSG00000168394	TAP1	transporter 1, ATP-binding cassette, sub-family B (MDR/TAP)	-1.25508	2.11e-173
ENSG00000168710	AHCYL1	adenosylhomocysteinase-like 1	-1.78113	0
ENSG00000169562	GJB1	gap junction protein, beta 1, 32kDa	-1.25462	1.32e-70
ENSG00000170004	CHD3	chromodomain helicase DNA binding protein 3	-1.29756	0
ENSG00000170275	CRTAP	cartilage associated protein	-1.53264	0
ENSG00000172183	ISG20	interferon stimulated exonuclease gene 20kDa	-2.69219	0
ENSG00000173210	ABLIM3	actin binding LIM protein family, member 3	-1.00888	1.69e-16
ENSG00000173546	CSPG4	chondroitin sulfate proteoglycan 4	-1.89875	1.61e-18
ENSG00000175198	PCCA	propionyl CoA carboxylase, alpha polypeptide	-3.04147	0
ENSG00000175899	A2M	alpha-2-macroglobulin	-2.50627	1.46e-144
ENSG00000176658	MYO1D	myosin ID	-1.07259	9.83e-28
ENSG00000178685	PARP10	poly (ADP-ribose) polymerase family, member 10	-1.66357	6.24e-104
ENSG00000178878	APOLD1	apolipoprotein L domain containing 1	-1.82165	2.76e-258
ENSG00000183615	FAM167B	family with sequence similarity 167, member B	-2.35469	5.72e-39
ENSG00000184381	PLA2G6	phospholipase A2, group VI (cytosolic, calcium-independent)	-1.04693	7.3e-164
ENSG00000185565	LSAMP	limbic system-associated membrane protein	-1.64413	9.64e-123
ENSG00000185621	LMLN	leishmanolysin-like (metallopeptidase M8 family)	-1.56846	4.3e-133
ENSG00000185745	IFIT1	interferon-induced protein with tetratricopeptide repeats 1	-1.62876	5.02e-59
ENSG00000186480	INSIG1	insulin induced gene 1	-2.14069	0
ENSG00000189058	APOD	apolipoprotein D	-5.99472	0
ENSG00000197702	PARVA	parvin, alpha	-1.43374	1.39e-103
ENSG00000198203	SULT1C2	sulfotransferase family, cytosolic, 1C, member 2	-3.96386	0
ENSG00000205336	GPR56	G protein-coupled receptor 56	-2.67119	0
ENSG00000236384	LINC00479	long intergenic non-protein coding RNA 479	-4.92096	0
ENSG00000255346	NOX5	NADPH oxidase, EF-hand calcium binding domain 5	-7.16921	6.16e-289
ENSG00000258791	LINC00520	long intergenic non-protein coding RNA 520	-1.75412	6.32e-261
ENSG00000108771	DHX58	DEXH (Asp-Glu-X-His) box polypeptide 58	-1.14552	4.89e-10
ENSG00000143416	SELENBP1	selenium binding protein 1	-2.50983	3.88e-69
ENSG00000112561	TFEB	transcription factor EB	-2.95753	2.54e-281
ENSG00000147852	VLDLR	very low density lipoprotein receptor	-1.07005	5.17e-43
ENSG00000163093	BBS5	Bardet-Biedl syndrome 5	-1.06339	5.51e-140
ENSG00000185201	IFITM2	interferon induced transmembrane protein 2	-1.93706	7.86e-14
ENSG00000197496	SLC2A10	solute carrier family 2 (facilitated glucose transporter), member 10	-1.46327	2.71e-97
ENSG00000118762	PKD2	polycystic kidney disease 2 (autosomal dominant)	-2.1943	0
ENSG00000103365	GGA2	golgi-associated, gamma adaptin ear containing, ARF binding protein 2	-1.26943	0
ENSG00000185008	ROBO2	roundabout, axon guidance receptor, homolog 2 (Drosophila)	-2.11328	0
ENSG00000160712	IL6R	interleukin 6 receptor	-2.167	0
ENSG00000106078	COBL	cordon-bleu homolog (mouse)	-1.73705	7.14e-169
ENSG00000082212	ME2	malic enzyme 2, NAD(+)-dependent, mitochondrial	-1.36384	1.25e-121
ENSG00000164778	EN2	engrailed homeobox 2	-2.56511	0
ENSG00000118276	B4GALT6	UDP-Gal:betaGlcNAc beta 1,4- galactosyltransferase, polypeptide 6	-2.15058	4.36e-82
ENSG00000111229	ARPC3	actin related protein 2/3 complex, subunit 3, 21kDa	-1.11476	2.57e-133
ENSG00000112186	CAP2	CAP, adenylate cyclase-associated protein, 2 (yeast)	-1.66024	0
ENSG00000116106	EPHA4	EPH receptor A4	-1.97762	3.26e-78
ENSG00000125844	RRBP1	ribosome binding protein 1 homolog 180kDa (dog)	-1.24726	5.84e-100
ENSG00000184500	PROS1	protein S (alpha)	-1.69622	1.16e-149
ENSG00000156804	FBXO32	F-box protein 32	-1.75573	5.29e-234
ENSG00000117479	SLC19A2	solute carrier family 19 (thiamine transporter), member 2	-1.16871	4.61e-138
ENSG00000137942	FNBP1L	formin binding protein 1-like	-1.11852	1.82e-76
ENSG00000130429	ARPC1B	actin related protein 2/3 complex, subunit 1B, 41kDa	-1.48553	3.22e-98
ENSG00000138646	HERC5	HECT and RLD domain containing E3 ubiquitin protein ligase 5	-1.36305	5.66e-82
ENSG00000105612	DNASE2	deoxyribonuclease II, lysosomal	-1.88856	0
ENSG00000092421	SEMA6A	sema domain, transmembrane domain (TM), and cytoplasmic domain, (semaphorin) 6A	-3.11526	0
ENSG00000197106	SLC6A17	solute carrier family 6, member 17	-1.60484	0
ENSG00000135677	GNS	glucosamine (N-acetyl)-6-sulfatase	-1.83745	0
ENSG00000196781	TLE1	transducin-like enhancer of split 1 (E(sp1) homolog, Drosophila)	-1.0387	4.4e-143
ENSG00000234745	HLA-B	major histocompatibility complex, class I, B	-1.18934	6.25e-46
ENSG00000130956	HABP4	hyaluronan binding protein 4	-1.15656	3.03e-118
ENSG00000070214	SLC44A1	solute carrier family 44, member 1	-2.74115	0
ENSG00000154917	RAB6B	RAB6B, member RAS oncogene family	-1.31867	1.5e-62
ENSG00000107104	KANK1	KN motif and ankyrin repeat domains 1	-1.46713	1.41e-80
ENSG00000172578	KLHL6	kelch-like 6 (Drosophila)	-2.17845	1.39e-285
ENSG00000065833	ME1	malic enzyme 1, NADP(+)-dependent, cytosolic	-1.28079	9.92e-21
ENSG00000115648	MLPH	melanophilin	-2.15072	2.78e-281
ENSG00000135090	TAOK3	TAO kinase 3	-2.12485	0
ENSG00000131473	ACLY	ATP citrate lyase	-1.07288	5.85e-246
ENSG00000078295	ADCY2	adenylate cyclase 2 (brain)	-2.23552	6.98e-217
ENSG00000115474	KCNJ13	potassium inwardly-rectifying channel, subfamily J, member 13	-1.97018	1.77e-06
ENSG00000187957	DNER	delta/notch-like EGF repeat containing	-5.09456	0
ENSG00000204186	ZDBF2	zinc finger, DBF-type containing 2	-1.92581	0
ENSG00000172572	PDE3A	phosphodiesterase 3A, cGMP-inhibited	-1.74271	1.15e-138
ENSG00000197043	ANXA6	annexin A6	-2.34698	0
ENSG00000110693	SOX6	SRY (sex determining region Y)-box 6	-2.10182	1.29e-90
ENSG00000118508	RAB32	RAB32, member RAS oncogene family	-1.96338	2.98e-142
ENSG00000131016	AKAP12	A kinase (PRKA) anchor protein 12	-1.51269	7.48e-98
ENSG00000171608	PIK3CD	phosphatidylinositol-4,5-bisphosphate 3-kinase, catalytic subunit delta	-1.18296	3.83e-106
ENSG00000126785	RHOJ	ras homolog family member J	-2.36523	1.46e-280
ENSG00000110080	ST3GAL4	ST3 beta-galactoside alpha-2,3-sialyltransferase 4	-2.45506	0
ENSG00000249115	HAUS5	HAUS augmin-like complex, subunit 5	-1.30826	9.08e-54
ENSG00000131873	CHSY1	chondroitin sulfate synthase 1	-1.70851	0
ENSG00000184588	PDE4B	phosphodiesterase 4B, cAMP-specific	-1.03362	1.61e-94
ENSG00000136888	ATP6V1G1	ATPase, H+ transporting, lysosomal 13kDa, V1 subunit G1	-2.0602	0
ENSG00000166501	PRKCB	protein kinase C, beta	-4.3408	0
ENSG00000101224	CDC25B	cell division cycle 25 homolog B (S. pombe)	-1.75779	9.43e-204
ENSG00000139173	TMEM117	transmembrane protein 117	-1.87369	1.66e-147
ENSG00000110090	CPT1A	carnitine palmitoyltransferase 1A (liver)	-1.01757	1.49e-54
ENSG00000168010	ATG16L2	autophagy related 16-like 2 (S. cerevisiae)	-3.24145	0
ENSG00000116016	EPAS1	endothelial PAS domain protein 1	-1.89847	0
ENSG00000006468	ETV1	ets variant 1	-1.73164	6.5e-217
ENSG00000143669	LYST	lysosomal trafficking regulator	-1.5109	3.35e-132
ENSG00000145495	MARCH6	membrane-associated ring finger (C3HC4) 6, E3 ubiquitin protein ligase	-1.12702	2.97e-164
ENSG00000081087	OSTM1	osteopetrosis associated transmembrane protein 1	-2.4212	0
ENSG00000158747	NBL1	neuroblastoma, suppression of tumorigenicity 1	-1.72262	2.48e-116
ENSG00000204525	HLA-C	major histocompatibility complex, class I, C	-1.19475	6.63e-70
ENSG00000173786	CNP	2',3'-cyclic nucleotide 3' phosphodiesterase	-1.1658	8.91e-190
ENSG00000148429	USP6NL	USP6 N-terminal like	-1.53362	1.38e-61
ENSG00000179388	EGR3	early growth response 3	-1.77809	1.53e-32
ENSG00000197971	MBP	myelin basic protein	-1.91271	5.02e-84
ENSG00000197535	MYO5A	myosin VA (heavy chain 12, myoxin)	-1.34225	2.18e-39
ENSG00000075151	EIF4G3	eukaryotic translation initiation factor 4 gamma, 3	-1.4654	1.67e-201
ENSG00000070731	ST6GALNAC2	ST6 (alpha-N-acetyl-neuraminyl-2,3-beta-galactosyl-1,3)-N-acetylgalactosaminide alpha-2,6-sialyltransferase 2	-2.81558	1.04e-214
ENSG00000189067	LITAF	lipopolysaccharide-induced TNF factor	-1.03226	1.74e-223
ENSG00000140470	ADAMTS17	ADAM metallopeptidase with thrombospondin type 1 motif, 17	-1.13037	2.07e-76
ENSG00000104324	CPQ	carboxypeptidase Q	-3.16827	5.57e-201
ENSG00000140379	BCL2A1	BCL2-related protein A1	-4.10688	0
ENSG00000172340	SUCLG2	succinate-CoA ligase, GDP-forming, beta subunit	-2.595	0
ENSG00000215252	GOLGA8B	golgin A8 family, member B	-1.01807	2.54e-54
ENSG00000120215	MLANA	melan-A	-3.10638	0
ENSG00000162341	TPCN2	two pore segment channel 2	-2.84671	0
ENSG00000139641	ESYT1	extended synaptotagmin-like protein 1	-1.20192	0
ENSG00000128245	YWHAH	tyrosine 3-monooxygenase/tryptophan 5-monooxygenase activation protein, eta polypeptide	-1.66198	0
ENSG00000122966	CIT	citron (rho-interacting, serine/threonine kinase 21)	-1.78553	1.21e-218
ENSG00000204128	C2orf72	chromosome 2 open reading frame 72	-3.20022	0
ENSG00000134222	PSRC1	proline/serine-rich coiled-coil 1	-1.36949	4.57e-210
ENSG00000136868	SLC31A1	solute carrier family 31 (copper transporters), member 1	-1.50343	2.42e-141
ENSG00000162599	NFIA	nuclear factor I/A	-1.18941	3.7e-94
ENSG00000131730	CKMT2	creatine kinase, mitochondrial 2 (sarcomeric)	-1.96567	7.76e-125
ENSG00000101384	JAG1	jagged 1	-1.20301	1.28e-113
ENSG00000135931	ARMC9	armadillo repeat containing 9	-1.52558	4.5e-125
ENSG00000152778	IFIT5	interferon-induced protein with tetratricopeptide repeats 5	-1.20171	2.27e-46
ENSG00000197746	PSAP	prosaposin	-1.17703	1.14e-185
ENSG00000168824	NSG1	Neuron-specific protein family member 1	-4.66275	0
ENSG00000205476	CCDC85C	coiled-coil domain containing 85C	-1.46443	8.46e-39
ENSG00000100077	ADRBK2	adrenergic, beta, receptor kinase 2	-4.38116	0
ENSG00000178209	PLEC	plectin	-1.05087	3.72e-295
ENSG00000154319	FAM167A	family with sequence similarity 167, member A	-3.66289	0
ENSG00000148180	GSN	gelsolin	-1.82383	0
ENSG00000187164	KIAA1598	KIAA1598	-2.98707	0
ENSG00000148834	GSTO1	glutathione S-transferase omega 1	-1.98621	0
ENSG00000134160	TRPM1	transient receptor potential cation channel, subfamily M, member 1	-3.37371	0
ENSG00000076706	MCAM	melanoma cell adhesion molecule	-2.88844	0
ENSG00000147862	NFIB	nuclear factor I/B	-1.50668	6.61e-78
ENSG00000135900	MRPL44	mitochondrial ribosomal protein L44	-1.22508	1.61e-155
ENSG00000213160	KLHL23	kelch-like 23 (Drosophila)	-1.51199	8.15e-64
ENSG00000090316	MAEA	macrophage erythroblast attacher	-1.34932	2e-182
ENSG00000141338	ABCA8	ATP-binding cassette, sub-family A (ABC1), member 8	-1.1389	8.02e-23
ENSG00000141376	BCAS3	breast carcinoma amplified sequence 3	-1.69911	9.48e-149
ENSG00000134138	MEIS2	Meis homeobox 2	-2.33193	8.17e-149
ENSG00000153208	MERTK	c-mer proto-oncogene tyrosine kinase	-1.76021	1.1e-136
ENSG00000121152	NCAPH	non-SMC condensin I complex, subunit H	-1.58521	3.73e-132
ENSG00000167889	MGAT5B	mannosyl (alpha-1,6-)-glycoprotein beta-1,6-N-acetyl-glucosaminyltransferase, isozyme B	-3.07633	0
ENSG00000163590	PPM1L	protein phosphatase, Mg2+/Mn2+ dependent, 1L	-1.07034	1.01e-17
ENSG00000196116	TDRD7	tudor domain containing 7	-2.38287	2.09e-187
ENSG00000038382	TRIO	trio Rho guanine nucleotide exchange factor	-1.11038	6.96e-233
ENSG00000170579	DLGAP1	discs, large (Drosophila) homolog-associated protein 1	-1.5892	5.31e-93
ENSG00000117308	GALE	UDP-galactose-4-epimerase	-1.11423	1.31e-116
ENSG00000114948	ADAM23	ADAM metallopeptidase domain 23	-1.77207	3.13e-131
ENSG00000176049	JAKMIP2	janus kinase and microtubule interacting protein 2	-2.7456	1.51e-62
ENSG00000167740	CYB5D2	cytochrome b5 domain containing 2	-1.63805	2.78e-70
ENSG00000237649	KIFC1	kinesin family member C1	-1.05125	3.26e-108
ENSG00000204103	MAFB	v-maf musculoaponeurotic fibrosarcoma oncogene homolog B (avian)	-1.92729	1.94e-65
ENSG00000169174	PCSK9	proprotein convertase subtilisin/kexin type 9	-3.60333	0
ENSG00000110811	LEPREL2	leprecan-like 2	-1.03478	8.23e-59
ENSG00000183150	GPR19	G protein-coupled receptor 19	-1.15395	1.72e-37
ENSG00000149289	ZC3H12C	zinc finger CCCH-type containing 12C	-1.55775	2.08e-50
ENSG00000169814	BTD	biotinidase	-1.07468	2.23e-41
ENSG00000165105	RASEF	RAS and EF-hand domain containing	-1.94538	1.04e-113
ENSG00000082196	C1QTNF3	C1q and tumor necrosis factor related protein 3	-1.56361	1.71e-94
ENSG00000174705	SH3PXD2B	SH3 and PX domains 2B	-1.8509	0
ENSG00000152217	SETBP1	SET binding protein 1	-2.004	0
ENSG00000157388	CACNA1D	calcium channel, voltage-dependent, L type, alpha 1D subunit	-3.00173	3.15e-47
ENSG00000155252	PI4K2A	phosphatidylinositol 4-kinase type 2 alpha	-1.27777	0
ENSG00000101680	LAMA1	laminin, alpha 1	-1.74801	3.26e-205
ENSG00000101004	NINL	ninein-like	-2.27427	2.18e-13
ENSG00000138623	SEMA7A	semaphorin 7A, GPI membrane anchor (John Milton Hagen blood group)	-1.77052	7.67e-146
ENSG00000166833	NAV2	neuron navigator 2	-1.45216	4.55e-79
ENSG00000071242	RPS6KA2	ribosomal protein S6 kinase, 90kDa, polypeptide 2	-1.5789	2.9e-66
ENSG00000115339	GALNT3	UDP-N-acetyl-alpha-D-galactosamine:polypeptide N-acetylgalactosaminyltransferase 3 (GalNAc-T3)	-2.2597	1.36e-52
ENSG00000127863	TNFRSF19	tumor necrosis factor receptor superfamily, member 19	-3.96351	0
ENSG00000182901	RGS7	regulator of G-protein signaling 7	-3.85629	9.84e-186
ENSG00000099219	ERMP1	endoplasmic reticulum metallopeptidase 1	-2.49356	3.7e-225
ENSG00000100982	PCIF1	PDX1 C-terminal inhibiting factor 1	-2.46667	2.36e-283
ENSG00000087077	TRIP6	thyroid hormone receptor interactor 6	-1.30729	1.22e-71
ENSG00000198715	C1orf85	chromosome 1 open reading frame 85	-2.46022	0
ENSG00000054690	PLEKHH1	pleckstrin homology domain containing, family H (with MyTH4 domain) member 1	-1.32224	4.54e-59
ENSG00000144218	AFF3	AF4/FMR2 family, member 3	-1.01818	1.34e-23
ENSG00000158022	TRIM63	tripartite motif containing 63, E3 ubiquitin protein ligase	-3.38984	0
ENSG00000166436	TRIM66	tripartite motif containing 66	-1.90864	1.84e-242
ENSG00000157538	DSCR3	Down syndrome critical region gene 3	-1.62223	0
ENSG00000031081	ARHGAP31	Rho GTPase activating protein 31	-2.49462	0
ENSG00000035403	VCL	vinculin	-1.52436	1.81e-219
ENSG00000135862	LAMC1	laminin, gamma 1 (formerly LAMB2)	-1.60127	4.55e-175
ENSG00000105613	MAST1	microtubule associated serine/threonine kinase 1	-2.25457	6.12e-223
ENSG00000167011	NAT16	N-acetyltransferase 16 (GCN5-related, putative)	-4.29585	0
ENSG00000086159	AQP6	aquaporin 6, kidney specific	-2.36851	4.94e-170
ENSG00000137441	FGFBP2	fibroblast growth factor binding protein 2	-3.57718	5.06e-163
ENSG00000167123	CERCAM	cerebral endothelial cell adhesion molecule	-1.58806	1.24e-84
ENSG00000185070	FLRT2	fibronectin leucine rich transmembrane protein 2	-1.2777	1.68e-140
ENSG00000170266	GLB1	galactosidase, beta 1	-1.08548	5.59e-196
ENSG00000105928	DFNA5	deafness, autosomal dominant 5	-1.28721	7.51e-171
ENSG00000171621	SPSB1	splA/ryanodine receptor domain and SOCS box containing 1	-1.37443	1.78e-152
ENSG00000187688	TRPV2	transient receptor potential cation channel, subfamily V, member 2	-1.68339	0
ENSG00000122574	WIPF3	WAS/WASL interacting protein family, member 3	-2.6744	1.87e-28
ENSG00000122778	KIAA1549	KIAA1549	-1.21758	1.95e-121
ENSG00000103647	CORO2B	coronin, actin binding protein, 2B	-2.11453	2.29e-171
ENSG00000136881	BAAT	bile acid CoA: amino acid N-acyltransferase (glycine N-choloyltransferase)	-1.17308	1.09e-64
ENSG00000184117	NIPSNAP1	nipsnap homolog 1 (C. elegans)	-1.70155	4.47e-205
ENSG00000159348	CYB5R1	cytochrome b5 reductase 1	-1.22329	5.81e-121
ENSG00000061337	LZTS1	leucine zipper, putative tumor suppressor 1	-1.38339	1.54e-64
ENSG00000077498	TYR	tyrosinase (oculocutaneous albinism IA)	-4.05124	0
ENSG00000178814	OPLAH	5-oxoprolinase (ATP-hydrolysing)	-3.25112	0
ENSG00000183876	ARSI	arylsulfatase family, member I	-3.30643	2.5e-11
ENSG00000088543	C3orf18	chromosome 3 open reading frame 18	-1.75861	5.23e-102
ENSG00000196557	CACNA1H	calcium channel, voltage-dependent, T type, alpha 1H subunit	-3.17145	0
ENSG00000072042	RDH11	retinol dehydrogenase 11 (all-trans/9-cis/11-cis)	-1.08813	1.85e-106
ENSG00000145284	SCD5	stearoyl-CoA desaturase 5	-1.63333	3.38e-136
ENSG00000141527	CARD14	caspase recruitment domain family, member 14	-1.73433	8.04e-48
ENSG00000115085	ZAP70	zeta-chain (TCR) associated protein kinase 70kDa	-1.9469	5.1e-119
ENSG00000079616	KIF22	kinesin family member 22	-1.35017	9.35e-96
ENSG00000143952	VPS54	vacuolar protein sorting 54 homolog (S. cerevisiae)	-1.01524	3.9e-103
ENSG00000100033	PRODH	proline dehydrogenase (oxidase) 1	-1.94143	1.84e-234
ENSG00000104517	UBR5	ubiquitin protein ligase E3 component n-recognin 5	-1.13063	9.56e-94
ENSG00000196549	MME	membrane metallo-endopeptidase	-3.60479	0
ENSG00000168765	GSTM4	glutathione S-transferase mu 4	-2.66638	0
ENSG00000024526	DEPDC1	DEP domain containing 1	-1.83298	0
ENSG00000133121	STARD13	StAR-related lipid transfer (START) domain containing 13	-1.69197	4.28e-284
ENSG00000157657	ZNF618	zinc finger protein 618	-1.1553	5.33e-55
ENSG00000095794	CREM	cAMP responsive element modulator	-1.05799	2.97e-151
ENSG00000110917	MLEC	malectin	-1.4267	6.19e-141
ENSG00000117676	RPS6KA1	ribosomal protein S6 kinase, 90kDa, polypeptide 1	-1.16923	2.9e-84
ENSG00000073060	SCARB1	scavenger receptor class B, member 1	-1.43504	9.42e-234
ENSG00000171488	LRRC8C	leucine rich repeat containing 8 family, member C	-1.61031	1.69e-125
ENSG00000091409	ITGA6	integrin, alpha 6	-1.12142	1.16e-87
ENSG00000150760	DOCK1	dedicator of cytokinesis 1	-2.01959	0
ENSG00000131711	MAP1B	microtubule-associated protein 1B	-2.42096	2.39e-183
ENSG00000023892	DEF6	differentially expressed in FDCP 6 homolog (mouse)	-2.06753	7.95e-259
ENSG00000108039	XPNPEP1	X-prolyl aminopeptidase (aminopeptidase P) 1, soluble	-1.50035	3.26e-131
ENSG00000133030	MPRIP	myosin phosphatase Rho interacting protein	-1.04022	9.2e-76
ENSG00000188643	S100A16	S100 calcium binding protein A16	-1.33734	2.91e-61
ENSG00000157227	MMP14	matrix metallopeptidase 14 (membrane-inserted)	-1.38025	1.69e-230
ENSG00000120725	SIL1	SIL1 homolog, endoplasmic reticulum chaperone (S. cerevisiae)	-1.22699	1.29e-109
ENSG00000179218	CALR	calreticulin	-1.15677	2.05e-84
ENSG00000115194	SLC30A3	solute carrier family 30 (zinc transporter), member 3	-1.2147	1e-46
ENSG00000158467	AHCYL2	adenosylhomocysteinase-like 2	-1.36488	1.02e-117
ENSG00000089057	SLC23A2	solute carrier family 23 (nucleobase transporters), member 2	-1.32481	3.62e-83
ENSG00000174021	GNG5	guanine nucleotide binding protein (G protein), gamma 5	-1.48129	2.49e-230
ENSG00000113810	SMC4	structural maintenance of chromosomes 4	-1.95499	1.74e-301
ENSG00000077232	DNAJC10	DnaJ (Hsp40) homolog, subfamily C, member 10	-1.05496	2.34e-100
ENSG00000183621	ZNF438	zinc finger protein 438	-1.2227	3.42e-62
ENSG00000134508	CABLES1	Cdk5 and Abl enzyme substrate 1	-1.40924	1.33e-43
ENSG00000164050	PLXNB1	plexin B1	-1.20172	6.04e-149
ENSG00000124772	CPNE5	copine V	-1.8802	3.35e-125
ENSG00000228203	RNF144A-AS1	RNF144A antisense RNA 1	-2.57433	1.86e-218
ENSG00000187837	HIST1H1C	histone cluster 1, H1c	-2.51803	1.65e-152
ENSG00000077063	CTTNBP2	cortactin binding protein 2	-1.63217	1.9e-28
ENSG00000178104	PDE4DIP	phosphodiesterase 4D interacting protein	-1.16158	1.3e-72
ENSG00000125827	TMX4	thioredoxin-related transmembrane protein 4	-2.75557	0
ENSG00000135097	MSI1	musashi homolog 1 (Drosophila)	-1.16727	3.54e-117
ENSG00000144749	LRIG1	leucine-rich repeats and immunoglobulin-like domains 1	-1.00287	4.92e-54
ENSG00000114626	ABTB1	ankyrin repeat and BTB (POZ) domain containing 1	-1.94536	1.7e-150
ENSG00000186642	PDE2A	phosphodiesterase 2A, cGMP-stimulated	-1.66567	7.54e-72
ENSG00000183688	FAM101B	family with sequence similarity 101, member B	-2.12255	4.04e-193
ENSG00000184254	ALDH1A3	aldehyde dehydrogenase 1 family, member A3	-3.48651	6.29e-17
ENSG00000196083	IL1RAP	interleukin 1 receptor accessory protein	-2.38215	0
ENSG00000072041	SLC6A15	solute carrier family 6 (neutral amino acid transporter), member 15	-2.97149	6.52e-240
ENSG00000139974	SLC38A6	solute carrier family 38, member 6	-1.62742	7.58e-133
ENSG00000084754	HADHA	hydroxyacyl-CoA dehydrogenase/3-ketoacyl-CoA thiolase/enoyl-CoA hydratase (trifunctional protein), alpha subunit	-2.04288	2.4e-222
ENSG00000050130	JKAMP	JNK1/MAPK8-associated membrane protein	-1.27295	5.66e-181
ENSG00000171729	TMEM51	transmembrane protein 51	-1.09362	1.48e-70
ENSG00000118785	SPP1	secreted phosphoprotein 1	-1.02341	1.12e-78
ENSG00000102048	ASB9	ankyrin repeat and SOCS box containing 9	-1.1987	3.81e-59
ENSG00000068650	ATP11A	ATPase, class VI, type 11A	-1.03341	1.16e-48
ENSG00000163359	COL6A3	collagen, type VI, alpha 3	-4.16653	2.8e-194
ENSG00000188467	SLC24A5	solute carrier family 24, member 5	-2.82554	2.65e-144
ENSG00000173171	MTX1	metaxin 1	-1.44307	6.94e-197
ENSG00000183421	RIPK4	receptor-interacting serine-threonine kinase 4	-2.30726	0
ENSG00000197892	KIF13B	kinesin family member 13B	-1.82596	3.17e-233
ENSG00000187231	SESTD1	SEC14 and spectrin domains 1	-2.48701	6.7e-206
ENSG00000174004	LRRC33	leucine rich repeat containing 33	-1.88602	1.79e-44
ENSG00000011523	CEP68	centrosomal protein 68kDa	-1.66326	3.21e-236
ENSG00000117899	MESDC2	mesoderm development candidate 2	-2.36704	0
ENSG00000215262	KCNU1	potassium channel, subfamily U, member 1	-2.58982	1.76e-104
ENSG00000122877	EGR2	early growth response 2	-1.50352	5.63e-41
ENSG00000122642	FKBP9	FK506 binding protein 9, 63 kDa	-1.56709	2.36e-137
ENSG00000134369	NAV1	neuron navigator 1	-2.50346	2.16e-240
ENSG00000132323	ILKAP	integrin-linked kinase-associated serine/threonine phosphatase	-1.00588	5.47e-121
ENSG00000091136	LAMB1	laminin, beta 1	-1.2812	7.5e-42
ENSG00000136247	ZDHHC4	zinc finger, DHHC-type containing 4	-1.03422	8.55e-116
ENSG00000164659	KIAA1324L	KIAA1324-like	-1.72415	2e-139
ENSG00000153071	DAB2	disabled homolog 2, mitogen-responsive phosphoprotein (Drosophila)	-1.3004	3.64e-156
ENSG00000108001	EBF3	early B-cell factor 3	-2.14765	1.07e-146
ENSG00000143801	PSEN2	presenilin 2 (Alzheimer disease 4)	-1.27601	8.98e-135
ENSG00000143341	HMCN1	hemicentin 1	-2.64542	2.86e-94
ENSG00000119729	RHOQ	ras homolog family member Q	-1.20778	1.44e-69
ENSG00000117399	CDC20	cell division cycle 20 homolog (S. cerevisiae)	-1.05913	7.91e-66
ENSG00000134287	ARF3	ADP-ribosylation factor 3	-1.38752	1.75e-187
ENSG00000053524	MCF2L2	MCF.2 cell line derived transforming sequence-like 2	-1.58569	7.08e-45
ENSG00000143514	TP53BP2	tumor protein p53 binding protein, 2	-1.08366	2.94e-176
ENSG00000169129	AFAP1L2	actin filament associated protein 1-like 2	-1.46901	3.44e-11
ENSG00000083067	TRPM3	transient receptor potential cation channel, subfamily M, member 3	-1.68555	2.16e-47
ENSG00000084444	KIAA1467	KIAA1467	-1.17513	5.58e-121
ENSG00000186951	PPARA	peroxisome proliferator-activated receptor alpha	-1.02569	2.56e-18
ENSG00000174669	SLC29A2	solute carrier family 29 (nucleoside transporters), member 2	-1.08675	7.36e-19
ENSG00000135525	MAP7	microtubule-associated protein 7	-2.35712	5.68e-104
ENSG00000112290	WASF1	WAS protein family, member 1	-1.99295	2.38e-250
ENSG00000189362	TMEM194B	transmembrane protein 194B	-1.49137	2.92e-122
ENSG00000084731	KIF3C	kinesin family member 3C	-1.01434	6.09e-145
ENSG00000021826	CPS1	carbamoyl-phosphate synthase 1, mitochondrial	-3.15672	3.29e-59
ENSG00000175643	RMI2	RMI2, RecQ mediated genome instability 2, homolog (S. cerevisiae)	-1.13239	3.75e-31
ENSG00000104833	TUBB4A	tubulin, beta 4A class IVa	-1.9247	1.39e-141
ENSG00000130294	KIF1A	kinesin family member 1A	-2.47054	1.5e-75
ENSG00000181381	DDX60L	DEAD (Asp-Glu-Ala-Asp) box polypeptide 60-like	-1.45564	6.11e-93
ENSG00000068024	HDAC4	histone deacetylase 4	-1.88119	1.96e-109
ENSG00000124181	PLCG1	phospholipase C, gamma 1	-1.67985	0
ENSG00000120278	PLEKHG1	pleckstrin homology domain containing, family G (with RhoGef domain) member 1	-1.34857	2.3e-46
ENSG00000134363	FST	follistatin	-1.01684	1.25e-81
ENSG00000080298	RFX3	regulatory factor X, 3 (influences HLA class II expression)	-1.53843	7.65e-96
ENSG00000114541	FRMD4B	FERM domain containing 4B	-3.32479	9.83e-288
ENSG00000146676	PURB	purine-rich element binding protein B	-1.42413	1.13e-203
ENSG00000158458	NRG2	neuregulin 2	-1.79486	1.66e-150
ENSG00000088280	ASAP3	ArfGAP with SH3 domain, ankyrin repeat and PH domain 3	-2.00368	9.62e-171
ENSG00000167995	BEST1	bestrophin 1	-3.91461	1.4e-260
ENSG00000105419	MEIS3	Meis homeobox 3	-1.36686	1.9e-26
ENSG00000198691	ABCA4	ATP-binding cassette, sub-family A (ABC1), member 4	-1.99761	6.12e-95
ENSG00000069974	RAB27A	RAB27A, member RAS oncogene family	-2.48934	2.67e-193
ENSG00000173801	JUP	junction plakoglobin	-1.00795	1.77e-79
ENSG00000158470	B4GALT5	UDP-Gal:betaGlcNAc beta 1,4- galactosyltransferase, polypeptide 5	-1.45883	2.63e-174
ENSG00000131697	NPHP4	nephronophthisis 4	-1.58238	3.34e-154
ENSG00000092020	PPP2R3C	protein phosphatase 2, regulatory subunit B'', gamma	-1.45844	8.01e-189
ENSG00000171310	CHST11	carbohydrate (chondroitin 4) sulfotransferase 11	-1.53271	1.55e-233
ENSG00000149218	ENDOD1	endonuclease domain containing 1	-1.64395	1.06e-158
ENSG00000112655	PTK7	PTK7 protein tyrosine kinase 7	-2.05259	0
ENSG00000003989	SLC7A2	solute carrier family 7 (cationic amino acid transporter, y+ system), member 2	-1.70616	1.25e-73
ENSG00000167191	GPRC5B	G protein-coupled receptor, family C, group 5, member B	-2.9308	0
ENSG00000129244	ATP1B2	ATPase, Na+/K+ transporting, beta 2 polypeptide	-2.5739	7.54e-82
ENSG00000092969	TGFB2	transforming growth factor, beta 2	-1.9152	5.38e-86
ENSG00000101098	RIMS4	regulating synaptic membrane exocytosis 4	-1.09463	3.24e-21
ENSG00000131370	SH3BP5	SH3-domain binding protein 5 (BTK-associated)	-1.77853	1.2e-84
ENSG00000203837	PNLIPRP3	pancreatic lipase-related protein 3	-3.92953	8.78e-148
ENSG00000130813	C19orf66	chromosome 19 open reading frame 66	-1.11187	7.56e-63
ENSG00000155099	TMEM55A	transmembrane protein 55A	-2.09117	2.64e-190
ENSG00000124217	MOCS3	molybdenum cofactor synthesis 3	-1.14293	3.65e-87
ENSG00000167107	ACSF2	acyl-CoA synthetase family member 2	-2.74527	0
ENSG00000129493	HEATR5A	HEAT repeat containing 5A	-1.4246	7.84e-172
ENSG00000167074	TEF	thyrotrophic embryonic factor	-1.96291	6.52e-249
ENSG00000102189	EEA1	early endosome antigen 1	-1.06444	3.78e-39
ENSG00000102054	RBBP7	retinoblastoma binding protein 7	-1.24197	1.56e-164
ENSG00000073849	ST6GAL1	ST6 beta-galactosamide alpha-2,6-sialyltranferase 1	-2.56747	2.05e-98
ENSG00000205269	TMEM170B	transmembrane protein 170B	-1.77394	1.97e-164
ENSG00000170604	IRF2BP1	interferon regulatory factor 2 binding protein 1	-1.73604	2.26e-89
ENSG00000151552	QDPR	quinoid dihydropteridine reductase	-1.02344	4.17e-38
ENSG00000149084	HSD17B12	hydroxysteroid (17-beta) dehydrogenase 12	-1.79556	5.63e-115
ENSG00000182256	GABRG3	gamma-aminobutyric acid (GABA) A receptor, gamma 3	-1.03961	1.56e-08
ENSG00000143786	CNIH3	cornichon homolog 3 (Drosophila)	-1.82907	2.76e-112
ENSG00000129173	E2F8	E2F transcription factor 8	-2.16394	2.77e-94
ENSG00000198814	GK	glycerol kinase	-2.88707	0
ENSG00000137265	IRF4	interferon regulatory factor 4	-3.42725	3.93e-137
ENSG00000101558	VAPA	VAMP (vesicle-associated membrane protein)-associated protein A, 33kDa	-1.65795	0
ENSG00000177807	KCNJ10	potassium inwardly-rectifying channel, subfamily J, member 10	-3.1377	7.6e-164
ENSG00000143776	CDC42BPA	CDC42 binding protein kinase alpha (DMPK-like)	-1.38394	8.26e-89
ENSG00000073921	PICALM	phosphatidylinositol binding clathrin assembly protein	-1.26286	1.42e-246
ENSG00000095383	TBC1D2	TBC1 domain family, member 2	-1.61056	5.81e-166
ENSG00000049245	VAMP3	vesicle-associated membrane protein 3 (cellubrevin)	-1.84043	0
ENSG00000065320	NTN1	netrin 1	-1.48605	2.78e-88
ENSG00000132383	RPA1	replication protein A1, 70kDa	-1.14049	5.05e-155
ENSG00000086232	EIF2AK1	eukaryotic translation initiation factor 2-alpha kinase 1	-1.20653	6.87e-295
ENSG00000138375	SMARCAL1	SWI/SNF related, matrix associated, actin dependent regulator of chromatin, subfamily a-like 1	-1.11506	4.01e-99
ENSG00000198612	COPS8	COP9 constitutive photomorphogenic homolog subunit 8 (Arabidopsis)	-1.82366	0
ENSG00000148700	ADD3	adducin 3 (gamma)	-1.93902	2.62e-81
ENSG00000101190	TCFL5	transcription factor-like 5 (basic helix-loop-helix)	-1.24571	1.39e-47
ENSG00000137575	SDCBP	syndecan binding protein (syntenin)	-2.3402	0
ENSG00000147509	RGS20	regulator of G-protein signaling 20	-1.71827	2.27e-208
ENSG00000168496	FEN1	flap structure-specific endonuclease 1	-1.22236	8.6e-80
ENSG00000124920	C11orf9	chromosome 11 open reading frame 9	-1.66702	1.65e-128
ENSG00000144847	IGSF11	immunoglobulin superfamily, member 11	-2.52269	2.77e-183
ENSG00000117298	ECE1	endothelin converting enzyme 1	-2.48048	0
ENSG00000099194	SCD	stearoyl-CoA desaturase (delta-9-desaturase)	-3.77901	0
ENSG00000107242	PIP5K1B	phosphatidylinositol-4-phosphate 5-kinase, type I, beta	-1.55459	4.05e-30
ENSG00000138346	DNA2	DNA replication helicase 2 homolog (yeast)	-1.02009	1.71e-65
ENSG00000148660	CAMK2G	calcium/calmodulin-dependent protein kinase II gamma	-1.35342	1.98e-175
ENSG00000169855	ROBO1	roundabout, axon guidance receptor, homolog 1 (Drosophila)	-1.06837	9.41e-50
ENSG00000243244	STON1	stonin 1	-2.43858	4.4e-207
ENSG00000188313	PLSCR1	phospholipid scramblase 1	-1.33497	5.86e-158
ENSG00000197081	IGF2R	insulin-like growth factor 2 receptor	-1.15223	1.58e-99
ENSG00000243279	PRAF2	PRA1 domain family, member 2	-1.45608	2.96e-149
ENSG00000111961	SASH1	SAM and SH3 domain containing 1	-1.15137	2.01e-69
ENSG00000125089	SH3TC1	SH3 domain and tetratricopeptide repeats 1	-2.93232	0
ENSG00000179403	VWA1	von Willebrand factor A domain containing 1	-2.32397	5.21e-248
ENSG00000197142	ACSL5	acyl-CoA synthetase long-chain family member 5	-2.49664	3.56e-87
ENSG00000088325	TPX2	TPX2, microtubule-associated, homolog (Xenopus laevis)	-1.67542	2.97e-215
ENSG00000134324	LPIN1	lipin 1	-1.91946	9.01e-305
ENSG00000169908	TM4SF1	transmembrane 4 L six family member 1	-3.29818	2.41e-72
ENSG00000142920	ADC	arginine decarboxylase	-1.00876	2.51e-108
ENSG00000196663	TECPR2	tectonin beta-propeller repeat containing 2	-1.06295	8.13e-76
ENSG00000158669	AGPAT6	1-acylglycerol-3-phosphate O-acyltransferase 6 (lysophosphatidic acid acyltransferase, zeta)	-1.09673	8.05e-151
ENSG00000242110	AMACR	alpha-methylacyl-CoA racemase	-1.01218	1.8e-25
ENSG00000134278	SPIRE1	spire homolog 1 (Drosophila)	-1.31372	2.59e-50
ENSG00000157077	ZFYVE9	zinc finger, FYVE domain containing 9	-1.20997	2.53e-59
ENSG00000188517	COL25A1	collagen, type XXV, alpha 1	-1.9603	2.17e-39
ENSG00000143061	IGSF3	immunoglobulin superfamily, member 3	-3.56224	0
ENSG00000139915	MDGA2	MAM domain containing glycosylphosphatidylinositol anchor 2	-1.07463	4.46e-21
ENSG00000135596	MICAL1	microtubule associated monoxygenase, calponin and LIM domain containing 1	-2.17599	0
ENSG00000105929	ATP6V0A4	ATPase, H+ transporting, lysosomal V0 subunit a4	-2.90744	5.57e-114
ENSG00000085999	RAD54L	RAD54-like (S. cerevisiae)	-1.00485	5.98e-32
ENSG00000115756	HPCAL1	hippocalcin-like 1	-1.68179	6.46e-265
ENSG00000179295	PTPN11	protein tyrosine phosphatase, non-receptor type 11	-1.94102	5.54e-273
ENSG00000160049	DFFA	DNA fragmentation factor, 45kDa, alpha polypeptide	-1.13266	3.12e-194
ENSG00000105854	PON2	paraoxonase 2	-1.0358	3.4e-84
ENSG00000145217	SLC26A1	solute carrier family 26 (sulfate transporter), member 1	-3.11918	3.77e-192
ENSG00000164733	CTSB	cathepsin B	-1.8464	4.62e-193
ENSG00000116852	KIF21B	kinesin family member 21B	-1.74856	3.37e-66
ENSG00000205464	ATP6AP1L	ATPase, H+ transporting, lysosomal accessory protein 1-like	-1.99763	7.58e-70
ENSG00000155097	ATP6V1C1	ATPase, H+ transporting, lysosomal 42kDa, V1 subunit C1	-2.03597	0
ENSG00000104812	GYS1	glycogen synthase 1 (muscle)	-1.20551	5.65e-206
ENSG00000136842	TMOD1	tropomodulin 1	-2.08905	1.41e-57
ENSG00000166961	MS4A15	membrane-spanning 4-domains, subfamily A, member 15	-1.17478	9.26e-93
ENSG00000076356	PLXNA2	plexin A2	-2.50447	7.68e-217
ENSG00000087008	ACOX3	acyl-CoA oxidase 3, pristanoyl	-1.13265	2.39e-86
ENSG00000132405	TBC1D14	TBC1 domain family, member 14	-1.57872	0
ENSG00000160194	NDUFV3	NADH dehydrogenase (ubiquinone) flavoprotein 3, 10kDa	-1.21907	8.83e-105
ENSG00000172497	ACOT12	acyl-CoA thioesterase 12	-1.31814	5e-28
ENSG00000164190	NIPBL	Nipped-B homolog (Drosophila)	-1.09047	3.38e-172
ENSG00000124785	NRN1	neuritin 1	-1.91201	8.3e-288
ENSG00000137501	SYTL2	synaptotagmin-like 2	-1.47702	0
ENSG00000142892	PIGK	phosphatidylinositol glycan anchor biosynthesis, class K	-1.47667	5.57e-162
ENSG00000018510	AGPS	alkylglycerone phosphate synthase	-1.09141	1.15e-65
ENSG00000161542	PRPSAP1	phosphoribosyl pyrophosphate synthetase-associated protein 1	-1.3143	9.05e-255
ENSG00000100504	PYGL	phosphorylase, glycogen, liver	-1.92476	3.09e-285
ENSG00000141258	SGSM2	small G protein signaling modulator 2	-1.76415	6.61e-262
ENSG00000167535	CACNB3	calcium channel, voltage-dependent, beta 3 subunit	-1.22721	2.67e-77
ENSG00000123983	ACSL3	acyl-CoA synthetase long-chain family member 3	-2.23258	8.31e-186
ENSG00000074416	MGLL	monoglyceride lipase	-1.48337	2.03e-12
ENSG00000185269	NOTUM	notum pectinacetylesterase homolog (Drosophila)	-1.52779	1.86e-45
ENSG00000106771	TMEM245	transmembrane protein 245	-1.50214	1.2e-93
ENSG00000173085	COQ2	coenzyme Q2 homolog, prenyltransferase (yeast)	-1.32275	4.8e-37
ENSG00000172869	DMXL1	Dmx-like 1	-1.3947	4.29e-81
ENSG00000244486	SCARF2	scavenger receptor class F, member 2	-1.00584	1.32e-72
ENSG00000091947	TMEM101	transmembrane protein 101	-1.58	1.91e-104
ENSG00000197748	WDR96	WD repeat domain 96	-1.31854	8.7e-37
ENSG00000185104	FAF1	Fas (TNFRSF6) associated factor 1	-1.31559	2.69e-177
ENSG00000245526	LINC00461	long intergenic non-protein coding RNA 461	-1.41765	2.83e-63
ENSG00000104412	EMC2	ER membrane protein complex subunit 2	-1.48564	1.5e-157
ENSG00000106780	MEGF9	multiple EGF-like-domains 9	-1.06446	8.67e-113
ENSG00000172197	MBOAT1	membrane bound O-acyltransferase domain containing 1	-1.55056	1.09e-101
ENSG00000145536	ADAMTS16	ADAM metallopeptidase with thrombospondin type 1 motif, 16	-1.75609	1.85e-30
ENSG00000108849	PPY	pancreatic polypeptide	-1.33909	4.51e-38
ENSG00000115919	KYNU	kynureninase	-1.36106	0.00447997
ENSG00000079459	FDFT1	farnesyl-diphosphate farnesyltransferase 1	-1.72502	1.03e-158
ENSG00000114279	FGF12	fibroblast growth factor 12	-4.1288	2.62e-298
ENSG00000197415	VEPH1	ventricular zone expressed PH domain homolog 1 (zebrafish)	-2.78845	3.41e-88
ENSG00000100344	PNPLA3	patatin-like phospholipase domain containing 3	-1.97888	2.81e-152
ENSG00000169891	REPS2	RALBP1 associated Eps domain containing 2	-1.91801	2.98e-154
ENSG00000141576	RNF157	ring finger protein 157	-2.62827	2.22e-260
ENSG00000198648	STK39	serine threonine kinase 39	-1.65407	1.33e-69
ENSG00000147130	ZMYM3	zinc finger, MYM-type 3	-1.15378	3.75e-148
ENSG00000154080	CHST9	carbohydrate (N-acetylgalactosamine 4-0) sulfotransferase 9	-2.65157	2.18e-234
ENSG00000181856	SLC2A4	solute carrier family 2 (facilitated glucose transporter), member 4	-2.54018	5.31e-63
ENSG00000179029	TMEM107	transmembrane protein 107	-1.21391	3.87e-91
ENSG00000119927	GPAM	glycerol-3-phosphate acyltransferase, mitochondrial	-1.69653	6.08e-99
ENSG00000157064	NMNAT2	nicotinamide nucleotide adenylyltransferase 2	-2.39721	1.98e-60
ENSG00000051341	POLQ	polymerase (DNA directed), theta	-1.56123	6.56e-64
ENSG00000211456	SACM1L	SAC1 suppressor of actin mutations 1-like (yeast)	-1.03978	2.21e-97
ENSG00000158008	EXTL1	exostoses (multiple)-like 1	-2.87151	2.64e-68
ENSG00000104177	MYEF2	myelin expression factor 2	-1.67289	1.56e-78
ENSG00000155970	EFHA2	EF-hand domain family, member A2	-1.30303	3.9e-53
ENSG00000159788	RGS12	regulator of G-protein signaling 12	-1.96379	2.44e-93
ENSG00000187773	FAM69C	family with sequence similarity 69, member C	-3.33198	9.68e-28
ENSG00000065882	TBC1D1	TBC1 (tre-2/USP6, BUB2, cdc16) domain family, member 1	-1.10495	1.24e-65
ENSG00000125772	GPCPD1	glycerophosphocholine phosphodiesterase GDE1 homolog (S. cerevisiae)	-1.18421	2.77e-35
ENSG00000101752	MIB1	mindbomb E3 ubiquitin protein ligase 1	-1.68141	3.3e-170
ENSG00000092529	CAPN3	calpain 3, (p94)	-1.92757	1.56e-81
ENSG00000101440	ASIP	agouti signaling protein	-2.39864	1.96e-66
ENSG00000181378	CCDC108	coiled-coil domain containing 108	-2.11528	8.43e-57
ENSG00000138101	DTNB	dystrobrevin, beta	-1.54234	9.08e-108
ENSG00000132718	SYT11	synaptotagmin XI	-1.23647	5.16e-193
ENSG00000139505	MTMR6	myotubularin related protein 6	-1.55884	1.34e-165
ENSG00000148730	EIF4EBP2	eukaryotic translation initiation factor 4E binding protein 2	-2.1629	0
ENSG00000181350	FAM211A	family with sequence similarity 211, member A	-2.19719	2.53e-40
ENSG00000234420	ZNF37BP	zinc finger protein 37B, pseudogene	-1.02263	3.56e-75
ENSG00000008118	CAMK1G	calcium/calmodulin-dependent protein kinase IG	-1.95851	1.84e-48
ENSG00000085063	CD59	CD59 molecule, complement regulatory protein	-2.01536	0
ENSG00000093009	CDC45	cell division cycle 45 homolog (S. cerevisiae)	-1.08304	7.17e-40
ENSG00000102878	HSF4	heat shock transcription factor 4	-2.48798	0
ENSG00000169604	ANTXR1	anthrax toxin receptor 1	-2.68912	0
ENSG00000082074	FYB	FYN binding protein	-1.30719	3.57e-08
ENSG00000082146	STRADB	STE20-related kinase adaptor beta	-2.5241	2.19e-183
ENSG00000110880	CORO1C	coronin, actin binding protein, 1C	-1.78475	0
ENSG00000125249	RAP2A	RAP2A, member of RAS oncogene family	-1.02989	1.17e-36
ENSG00000042493	CAPG	capping protein (actin filament), gelsolin-like	-2.60205	9.09e-73
ENSG00000066084	DIP2B	DIP2 disco-interacting protein 2 homolog B (Drosophila)	-1.22337	2.82e-60
ENSG00000116641	DOCK7	dedicator of cytokinesis 7	-1.47395	8.8e-98
ENSG00000171604	CXXC5	CXXC finger protein 5	-1.78821	5.4e-240
ENSG00000174083	PIK3R6	phosphoinositide-3-kinase, regulatory subunit 6	-2.93923	3.68e-90
ENSG00000161798	AQP5	aquaporin 5	-2.54039	5.83e-54
ENSG00000058335	RASGRF1	Ras protein-specific guanine nucleotide-releasing factor 1	-1.63196	1.47e-36
ENSG00000119333	WDR34	WD repeat domain 34	-1.49737	6.71e-56
ENSG00000108733	PEX12	peroxisomal biogenesis factor 12	-1.78845	2.89e-58
ENSG00000198597	ZNF536	zinc finger protein 536	-1.71234	2.79e-61
ENSG00000141448	GATA6	GATA binding protein 6	-1.13277	3.73e-28
ENSG00000039319	ZFYVE16	zinc finger, FYVE domain containing 16	-3.37402	0
ENSG00000131732	ZCCHC9	zinc finger, CCHC domain containing 9	-1.27651	7.72e-106
ENSG00000093010	COMT	catechol-O-methyltransferase	-1.09972	5.91e-78
ENSG00000165868	HSPA12A	heat shock 70kDa protein 12A	-2.01571	1.17e-153
ENSG00000198873	GRK5	G protein-coupled receptor kinase 5	-1.4126	2.15e-67
ENSG00000148450	MSRB2	methionine sulfoxide reductase B2	-2.4384	0
ENSG00000172456	FGGY	FGGY carbohydrate kinase domain containing	-1.07797	4.65e-17
ENSG00000188157	AGRN	agrin	-1.79275	6.84e-214
ENSG00000137807	KIF23	kinesin family member 23	-1.06258	6.85e-76
ENSG00000197694	SPTAN1	spectrin, alpha, non-erythrocytic 1	-1.25113	2.04e-249
ENSG00000168952	STXBP6	syntaxin binding protein 6 (amisyn)	-1.0095	1.01e-11
ENSG00000151117	TMEM86A	transmembrane protein 86A	-2.02572	8.88e-150
ENSG00000198089	SFI1	Sfi1 homolog, spindle assembly associated (yeast)	-1.21329	1.43e-80
ENSG00000035687	ADSS	adenylosuccinate synthase	-2.18521	3.74e-185
ENSG00000124019	FAM124B	family with sequence similarity 124B	-1.24167	3.29e-31
ENSG00000075785	RAB7A	RAB7A, member RAS oncogene family	-1.26781	5.88e-263
ENSG00000165424	ZCCHC24	zinc finger, CCHC domain containing 24	-1.90364	1.34e-128
ENSG00000176715	ACSF3	acyl-CoA synthetase family member 3	-1.63126	5.22e-111
ENSG00000118596	SLC16A7	solute carrier family 16, member 7 (monocarboxylic acid transporter 2)	-1.36633	1.13e-12
ENSG00000177414	UBE2U	ubiquitin-conjugating enzyme E2U (putative)	-2.88238	2.12e-188
ENSG00000179241	LDLRAD3	low density lipoprotein receptor class A domain containing 3	-1.84766	1.2e-176
ENSG00000185986	SDHAP3	succinate dehydrogenase complex, subunit A, flavoprotein pseudogene 3	-1.16581	2.87e-32
ENSG00000156103	MMP16	matrix metallopeptidase 16 (membrane-inserted)	-1.00082	8.58e-20
ENSG00000159214	CCDC24	coiled-coil domain containing 24	-2.47116	9.52e-93
ENSG00000057252	SOAT1	sterol O-acyltransferase 1	-1.35224	5.42e-124
ENSG00000206341	HLA-H	major histocompatibility complex, class I, H (pseudogene)	-1.74856	2.13e-50
ENSG00000180776	ZDHHC20	zinc finger, DHHC-type containing 20	-1.01622	6.87e-11
ENSG00000173706	HEG1	HEG homolog 1 (zebrafish)	-1.72364	1.39e-153
ENSG00000114054	PCCB	propionyl CoA carboxylase, beta polypeptide	-1.18665	1.44e-53
ENSG00000072310	SREBF1	sterol regulatory element binding transcription factor 1	-1.91882	0
ENSG00000064393	HIPK2	homeodomain interacting protein kinase 2	-2.12859	5.36e-72
ENSG00000163945	UVSSA	UV-stimulated scaffold protein A	-1.00556	1.48e-103
ENSG00000138336	TET1	tet methylcytosine dioxygenase 1	-1.83987	4.59e-114
ENSG00000159674	SPON2	spondin 2, extracellular matrix protein	-2.28419	8.61e-43
ENSG00000136231	IGF2BP3	insulin-like growth factor 2 mRNA binding protein 3	-1.60344	1.6e-149
ENSG00000157483	MYO1E	myosin IE	-1.01087	5.1e-92
ENSG00000135929	CYP27A1	cytochrome P450, family 27, subfamily A, polypeptide 1	-1.57376	9.99e-164
ENSG00000160055	TMEM234	transmembrane protein 234	-1.74515	5.89e-245
ENSG00000197594	ENPP1	ectonucleotide pyrophosphatase/phosphodiesterase 1	-2.51208	1.03e-258
ENSG00000129538	RNASE1	ribonuclease, RNase A family, 1 (pancreatic)	-6.50167	1.03e-99
ENSG00000171467	ZNF318	zinc finger protein 318	-1.66487	0
ENSG00000174945	AMZ1	archaelysin family metallopeptidase 1	-1.65024	4.41e-44
ENSG00000112699	GMDS	GDP-mannose 4,6-dehydratase	-1.19021	6.2e-57
ENSG00000161653	NAGS	N-acetylglutamate synthase	-3.59483	1.9e-145
ENSG00000151176	PLBD2	phospholipase B domain containing 2	-2.3071	1.61e-192
ENSG00000167202	TBC1D2B	TBC1 domain family, member 2B	-1.78447	3.89e-233
ENSG00000067057	PFKP	phosphofructokinase, platelet	-3.31815	0
ENSG00000172292	CERS6	ceramide synthase 6	-1.51302	7.54e-64
ENSG00000198054	DSCR8	Down syndrome critical region gene 8	-1.09404	1.99e-74
ENSG00000174348	PODN	podocan	-3.60201	2.37e-75
ENSG00000160307	S100B	S100 calcium binding protein B	-2.3268	6.62e-125
ENSG00000112679	DUSP22	dual specificity phosphatase 22	-1.32917	1.08e-117
ENSG00000206560	ANKRD28	ankyrin repeat domain 28	-1.68706	0
ENSG00000144455	SUMF1	sulfatase modifying factor 1	-1.95202	3.09e-172
ENSG00000104979	C19orf53	chromosome 19 open reading frame 53	-1.11531	2.79e-76
ENSG00000145555	MYO10	myosin X	-1.14901	4.84e-73
ENSG00000114127	XRN1	5'-3' exoribonuclease 1	-1.10139	1.68e-105
ENSG00000163689	C3orf67	chromosome 3 open reading frame 67	-1.12912	3.71e-44
ENSG00000089820	ARHGAP4	Rho GTPase activating protein 4	-2.05374	4.56e-75
ENSG00000152223	EPG5	ectopic P-granules autophagy protein 5 homolog (C. elegans)	-1.12302	7.34e-86
ENSG00000198056	PRIM1	primase, DNA, polypeptide 1 (49kDa)	-1.90467	3.15e-107
ENSG00000223414	LINC00473	long intergenic non-protein coding RNA 473	-2.66568	4.47e-300
ENSG00000100302	RASD2	RASD family, member 2	-1.44595	1.77e-80
ENSG00000135519	KCNH3	potassium voltage-gated channel, subfamily H (eag-related), member 3	-1.7394	5.89e-34
ENSG00000244476	ERVFRD-1	endogenous retrovirus group FRD, member 1	-2.45	3.16e-70
ENSG00000005471	ABCB4	ATP-binding cassette, sub-family B (MDR/TAP), member 4	-1.56099	4.41e-23
ENSG00000171241	SHCBP1	SHC SH2-domain binding protein 1	-1.55312	9.84e-276
ENSG00000164985	PSIP1	PC4 and SFRS1 interacting protein 1	-1.33816	4.79e-112
ENSG00000135919	SERPINE2	serpin peptidase inhibitor, clade E (nexin, plasminogen activator inhibitor type 1), member 2	-1.28598	1.16e-138
ENSG00000157470	FAM81A	family with sequence similarity 81, member A	-1.29843	3.78e-32
ENSG00000239474	KBTBD10	kelch repeat and BTB (POZ) domain containing 10	-1.08047	6.79e-09
ENSG00000167550	RHEBL1	Ras homolog enriched in brain like 1	-1.26583	2.03e-35
ENSG00000170915	PAQR8	progestin and adipoQ receptor family member VIII	-2.87922	0
ENSG00000135047	CTSL1	cathepsin L1	-2.81318	0
ENSG00000134376	CRB1	crumbs homolog 1 (Drosophila)	-4.06361	1.89e-127
ENSG00000175471	MCTP1	multiple C2 domains, transmembrane 1	-1.45877	8.41e-104
ENSG00000049323	LTBP1	latent transforming growth factor beta binding protein 1	-1.16554	5.78e-53
ENSG00000115841	FAM82A1	family with sequence similarity 82, member A1	-1.67552	8.96e-144
ENSG00000119684	MLH3	mutL homolog 3 (E. coli)	-2.23327	8.2e-83
ENSG00000122507	BBS9	Bardet-Biedl syndrome 9	-2.45562	3.16e-159
ENSG00000160766	GBAP1	glucosidase, beta, acid pseudogene 1	-2.05075	7.01e-268
ENSG00000107789	MINPP1	multiple inositol-polyphosphate phosphatase 1	-1.78327	0
ENSG00000115041	KCNIP3	Kv channel interacting protein 3, calsenilin	-1.72894	2.78e-64
ENSG00000010017	RANBP9	RAN binding protein 9	-1.46732	6.49e-119
ENSG00000112039	FANCE	Fanconi anemia, complementation group E	-1.13225	8.76e-66
ENSG00000151116	UEVLD	UEV and lactate/malate dehyrogenase domains	-1.01971	8.21e-38
ENSG00000020181	GPR124	G protein-coupled receptor 124	-1.54051	1.73e-175
ENSG00000142494	SLC47A1	solute carrier family 47, member 1	-1.75324	1.94e-54
ENSG00000112367	FIG4	FIG4 homolog, SAC1 lipid phosphatase domain containing (S. cerevisiae)	-1.24988	2.07e-80
ENSG00000182957	SPATA13	spermatogenesis associated 13	-1.30385	1.32e-76
ENSG00000124299	PEPD	peptidase D	-1.21562	2.74e-67
ENSG00000167315	ACAA2	acetyl-CoA acyltransferase 2	-1.81394	3.43e-106
ENSG00000133619	KRBA1	KRAB-A domain containing 1	-1.11439	1.43e-82
ENSG00000081760	AACS	acetoacetyl-CoA synthetase	-2.37147	0
ENSG00000169302	STK32A	serine/threonine kinase 32A	-2.12401	5.34e-84
ENSG00000125775	SDCBP2	syndecan binding protein (syntenin) 2	-1.07881	6.01e-15
ENSG00000186301	MST1P2	macrophage stimulating 1 (hepatocyte growth factor-like) pseudogene 2	-2.28652	1.04e-86
ENSG00000054654	SYNE2	spectrin repeat containing, nuclear envelope 2	-1.08778	3.06e-36
ENSG00000204248	COL11A2	collagen, type XI, alpha 2	-1.1079	7.37e-20
ENSG00000185418	TARSL2	threonyl-tRNA synthetase-like 2	-1.60756	3.69e-169
ENSG00000128973	CLN6	ceroid-lipofuscinosis, neuronal 6, late infantile, variant	-1.8119	3.68e-117
ENSG00000047249	ATP6V1H	ATPase, H+ transporting, lysosomal 50/57kDa, V1 subunit H	-2.24981	0
ENSG00000118257	NRP2	neuropilin 2	-2.85899	0
ENSG00000148344	PTGES	prostaglandin E synthase	-1.3997	7.64e-06
ENSG00000163412	EIF4E3	eukaryotic translation initiation factor 4E family member 3	-1.40861	1.81e-11
ENSG00000214575	CPEB1	cytoplasmic polyadenylation element binding protein 1	-1.91482	4.44e-158
ENSG00000169760	NLGN1	neuroligin 1	-2.69215	6.32e-129
ENSG00000138463	DIRC2	disrupted in renal carcinoma 2	-1.42222	6.1e-241
ENSG00000125246	CLYBL	citrate lyase beta like	-1.66939	5.57e-42
ENSG00000135298	BAI3	brain-specific angiogenesis inhibitor 3	-1.3681	1.85e-35
ENSG00000090060	PAPOLA	poly(A) polymerase alpha	-1.11916	4.47e-136
ENSG00000131096	PYY	peptide YY	-3.48467	9.51e-68
ENSG00000116882	HAO2	hydroxyacid oxidase 2 (long chain)	-2.65479	4.88e-119
ENSG00000131100	ATP6V1E1	ATPase, H+ transporting, lysosomal 31kDa, V1 subunit E1	-1.21124	0
ENSG00000205309	NT5M	5',3'-nucleotidase, mitochondrial	-2.1703	5.14e-70
ENSG00000170961	HAS2	hyaluronan synthase 2	-1.49724	3.25e-32
ENSG00000162607	USP1	ubiquitin specific peptidase 1	-1.77897	7.72e-116
ENSG00000141577	AZI1	5-azacytidine induced 1	-1.48825	1.26e-145
ENSG00000143578	CREB3L4	cAMP responsive element binding protein 3-like 4	-1.15483	9.42e-82
ENSG00000110844	PRPF40B	PRP40 pre-mRNA processing factor 40 homolog B (S. cerevisiae)	-1.40479	7.18e-89
ENSG00000119943	PYROXD2	pyridine nucleotide-disulphide oxidoreductase domain 2	-1.23582	5.99e-90
ENSG00000244038	DDOST	dolichyl-diphosphooligosaccharide--protein glycosyltransferase	-1.37341	0
ENSG00000160191	PDE9A	phosphodiesterase 9A	-2.40314	1.02e-100
ENSG00000172638	EFEMP2	EGF containing fibulin-like extracellular matrix protein 2	-3.23411	8.71e-109
ENSG00000174628	IQCK	IQ motif containing K	-2.55911	5.5e-205
ENSG00000163683	C4orf34	chromosome 4 open reading frame 34	-1.78655	1.63e-147
ENSG00000104205	SGK3	serum/glucocorticoid regulated kinase family, member 3	-2.32096	0
ENSG00000156966	B3GNT7	UDP-GlcNAc:betaGal beta-1,3-N-acetylglucosaminyltransferase 7	-1.14035	3.82e-14
ENSG00000135205	CCDC146	coiled-coil domain containing 146	-1.12077	9.54e-52
ENSG00000180035	ZNF48	zinc finger protein 48	-1.70589	3.74e-99
ENSG00000164398	ACSL6	acyl-CoA synthetase long-chain family member 6	-2.65872	1.23e-51
ENSG00000067955	CBFB	core-binding factor, beta subunit	-1.46166	3.47e-124
ENSG00000049769	PPP1R3F	protein phosphatase 1, regulatory subunit 3F	-1.98136	7.69e-157
ENSG00000100968	NFATC4	nuclear factor of activated T-cells, cytoplasmic, calcineurin-dependent 4	-1.07566	1.39e-33
ENSG00000141002	TCF25	transcription factor 25 (basic helix-loop-helix)	-1.18367	3.59e-206
ENSG00000135905	DOCK10	dedicator of cytokinesis 10	-1.93316	9.07e-72
ENSG00000110628	SLC22A18	solute carrier family 22, member 18	-3.30377	0
ENSG00000173757	STAT5B	signal transducer and activator of transcription 5B	-1.16028	9.76e-69
ENSG00000133026	MYH10	myosin, heavy chain 10, non-muscle	-1.93299	2.22e-201
ENSG00000143466	IKBKE	inhibitor of kappa light polypeptide gene enhancer in B-cells, kinase epsilon	-2.1468	1.34e-130
ENSG00000164961	KIAA0196	KIAA0196	-1.46934	4.77e-204
ENSG00000151491	EPS8	epidermal growth factor receptor pathway substrate 8	-1.92615	0
ENSG00000170369	CST2	cystatin SA	-3.571	1.79e-58
ENSG00000107263	RAPGEF1	Rap guanine nucleotide exchange factor (GEF) 1	-1.09048	1.72e-53
ENSG00000086717	PPEF1	protein phosphatase, EF-hand calcium binding domain 1	-1.63256	1.42e-17
ENSG00000136573	BLK	B lymphoid tyrosine kinase	-1.26648	4.61e-19
ENSG00000154114	TBCEL	tubulin folding cofactor E-like	-1.20254	4.43e-93
ENSG00000212766	LINC00277	long intergenic non-protein coding RNA 277	-2.69352	1.11e-60
ENSG00000145050	MANF	mesencephalic astrocyte-derived neurotrophic factor	-1.28311	4.31e-111
ENSG00000171492	LRRC8D	leucine rich repeat containing 8 family, member D	-1.23002	4.09e-57
ENSG00000185650	ZFP36L1	zinc finger protein 36, C3H type-like 1	-1.16248	3.91e-205
ENSG00000102445	KIAA0226L	KIAA0226-like	-1.77831	9.35e-50
ENSG00000137486	ARRB1	arrestin, beta 1	-2.03588	2.37e-197
ENSG00000214826	DDX12P	DEAD/H (Asp-Glu-Ala-Asp/His) box polypeptide 12, pseudogene	-1.04052	1.87e-55
ENSG00000112394	SLC16A10	solute carrier family 16, member 10 (aromatic amino acid transporter)	-2.50737	1.52e-133
ENSG00000135409	AMHR2	anti-Mullerian hormone receptor, type II	-5.30502	1.22e-64
ENSG00000164877	MICALL2	MICAL-like 2	-1.14557	4.93e-22
ENSG00000205777	GAGE1	G antigen 1	-1.63258	4.14e-48
ENSG00000077092	RARB	retinoic acid receptor, beta	-2.92307	4.47e-62
ENSG00000188269	OR7A5	olfactory receptor, family 7, subfamily A, member 5	-1.89041	3.01e-24
ENSG00000198467	TPM2	tropomyosin 2 (beta)	-1.1338	2.05e-22
ENSG00000064042	LIMCH1	LIM and calponin homology domains 1	-2.6723	1.13e-202
ENSG00000137815	RTF1	Rtf1, Paf1/RNA polymerase II complex component, homolog (S. cerevisiae)	-2.05676	0
ENSG00000071553	ATP6AP1	ATPase, H+ transporting, lysosomal accessory protein 1	-2.75595	0
ENSG00000018408	WWTR1	WW domain containing transcription regulator 1	-1.41164	2.98e-206
ENSG00000140479	PCSK6	proprotein convertase subtilisin/kexin type 6	-1.12937	1.82e-43
ENSG00000004766	CCDC132	coiled-coil domain containing 132	-1.71991	4.84e-155
ENSG00000169499	PLEKHA2	pleckstrin homology domain containing, family A (phosphoinositide binding specific) member 2	-1.46828	1.36e-51
ENSG00000112992	NNT	nicotinamide nucleotide transhydrogenase	-1.96732	3.66e-125
ENSG00000099330	OCEL1	occludin/ELL domain containing 1	-1.48461	2.05e-112
ENSG00000151693	ASAP2	ArfGAP with SH3 domain, ankyrin repeat and PH domain 2	-1.96725	1.38e-183
ENSG00000023171	GRAMD1B	GRAM domain containing 1B	-1.82214	0.00326533
ENSG00000167363	FN3K	fructosamine 3 kinase	-2.71586	3.26e-288
ENSG00000196911	KPNA5	karyopherin alpha 5 (importin alpha 6)	-1.09963	6.75e-73
ENSG00000169756	LIMS1	LIM and senescent cell antigen-like domains 1	-1.60852	1.03e-135
ENSG00000058056	USP13	ubiquitin specific peptidase 13 (isopeptidase T-3)	-1.52775	5.22e-110
ENSG00000173068	BNC2	basonuclin 2	-2.00654	1.23e-117
ENSG00000141510	TP53	tumor protein p53	-1.21879	1.34e-78
ENSG00000183762	KREMEN1	kringle containing transmembrane protein 1	-1.62945	1.49e-65
ENSG00000000003	TSPAN6	tetraspanin 6	-2.65968	0
ENSG00000258839	MC1R	melanocortin 1 receptor (alpha melanocyte stimulating hormone receptor)	-1.33442	1.73e-108
ENSG00000141349	G6PC3	glucose 6 phosphatase, catalytic, 3	-1.59014	0
ENSG00000115461	IGFBP5	insulin-like growth factor binding protein 5	-2.61112	1.94e-66
ENSG00000135124	P2RX4	purinergic receptor P2X, ligand-gated ion channel, 4	-1.27298	3.69e-150
ENSG00000105976	MET	met proto-oncogene (hepatocyte growth factor receptor)	-1.88549	1.67e-77
ENSG00000182473	EXOC7	exocyst complex component 7	-1.01702	1.81e-93
ENSG00000169371	SNUPN	snurportin 1	-1.14391	1.47e-19
ENSG00000139168	ZCRB1	zinc finger CCHC-type and RNA binding motif 1	-1.68279	1.05e-173
ENSG00000132613	MTSS1L	metastasis suppressor 1-like	-1.41658	2.9e-223
ENSG00000069493	CLEC2D	C-type lectin domain family 2, member D	-1.98345	1.83e-57
ENSG00000175087	PDIK1L	PDLIM1 interacting kinase 1 like	-1.14918	4.59e-98
ENSG00000124831	LRRFIP1	leucine rich repeat (in FLII) interacting protein 1	-1.13278	2.84e-81
ENSG00000181045	SLC26A11	solute carrier family 26, member 11	-1.41724	1.32e-152
ENSG00000102575	ACP5	acid phosphatase 5, tartrate resistant	-2.82372	0
ENSG00000115652	UXS1	UDP-glucuronate decarboxylase 1	-1.56567	1.36e-215
ENSG00000144035	NAT8	N-acetyltransferase 8 (GCN5-related, putative)	-2.94813	1.87e-45
ENSG00000127527	EPS15L1	epidermal growth factor receptor pathway substrate 15-like 1	-1.16571	1.91e-92
ENSG00000141933	TPGS1	tubulin polyglutamylase complex subunit 1	-1.32529	1.45e-32
ENSG00000136156	ITM2B	integral membrane protein 2B	-2.18019	0
ENSG00000091844	RGS17	regulator of G-protein signaling 17	-1.25363	4.78e-29
ENSG00000147576	ADHFE1	alcohol dehydrogenase, iron containing, 1	-1.91813	3.43e-114
ENSG00000185924	RTN4RL1	reticulon 4 receptor-like 1	-1.82776	2.06e-69
ENSG00000104635	SLC39A14	solute carrier family 39 (zinc transporter), member 14	-1.05511	1.08e-36
ENSG00000171791	BCL2	B-cell CLL/lymphoma 2	-1.92608	0
ENSG00000155749	ALS2CR12	amyotrophic lateral sclerosis 2 (juvenile) chromosome region, candidate 12	-1.74804	3.05e-54
ENSG00000104953	TLE6	transducin-like enhancer of split 6 (E(sp1) homolog, Drosophila)	-1.16662	2.74e-46
ENSG00000166575	TMEM135	transmembrane protein 135	-1.77938	2.31e-125
ENSG00000140522	RLBP1	retinaldehyde binding protein 1	-1.03866	5.18e-10
ENSG00000164506	STXBP5	syntaxin binding protein 5 (tomosyn)	-1.76519	1.35e-105
ENSG00000041515	MYO16	myosin XVI	-2.29828	1.37e-144
ENSG00000103479	RBL2	retinoblastoma-like 2 (p130)	-1.02639	2.32e-30
ENSG00000172500	FIBP	fibroblast growth factor (acidic) intracellular binding protein	-1.19433	2.64e-33
ENSG00000129534	MIS18BP1	MIS18 binding protein 1	-1.32301	1.97e-132
ENSG00000164434	FABP7	fatty acid binding protein 7, brain	-1.21345	2.44e-11
ENSG00000119630	PGF	placental growth factor	-3.13983	9.81e-109
ENSG00000134215	VAV3	vav 3 guanine nucleotide exchange factor	-1.2449	9.39e-07
ENSG00000145335	SNCA	synuclein, alpha (non A4 component of amyloid precursor)	-1.60729	0
ENSG00000175029	CTBP2	C-terminal binding protein 2	-1.55408	2.63e-292
ENSG00000116991	SIPA1L2	signal-induced proliferation-associated 1 like 2	-1.16853	5.13e-73
ENSG00000019485	PRDM11	PR domain containing 11	-1.62061	0.000598377
ENSG00000109339	MAPK10	mitogen-activated protein kinase 10	-3.90893	6.88e-48
ENSG00000185278	ZBTB37	zinc finger and BTB domain containing 37	-1.6787	1.61e-19
ENSG00000115993	TRAK2	trafficking protein, kinesin binding 2	-2.43528	3.69e-250
ENSG00000170819	BFSP2	beaded filament structural protein 2, phakinin	-1.15663	1.53e-17
ENSG00000010318	PHF7	PHD finger protein 7	-1.50728	2.89e-86
ENSG00000254389	RHPN1-AS1	RHPN1 antisense RNA 1	-1.22517	1.73e-20
ENSG00000213585	VDAC1	voltage-dependent anion channel 1	-1.32189	2.6e-205
ENSG00000178175	ZNF366	zinc finger protein 366	-1.67128	2.51e-17
ENSG00000173821	RNF213	ring finger protein 213	-1.44521	1.1e-79
ENSG00000198870	C9orf96	chromosome 9 open reading frame 96	-1.24749	3.34e-51
ENSG00000121753	BAI2	brain-specific angiogenesis inhibitor 2	-3.41745	0
ENSG00000187091	PLCD1	phospholipase C, delta 1	-1.27401	4.26e-39
ENSG00000017373	SRCIN1	SRC kinase signaling inhibitor 1	-2.0074	1.12e-55
ENSG00000166839	ANKDD1A	ankyrin repeat and death domain containing 1A	-1.27053	1.29e-38
ENSG00000198363	ASPH	aspartate beta-hydroxylase	-1.15468	3.42e-133
ENSG00000152380	FAM151B	family with sequence similarity 151, member B	-3.5972	2.87e-66
ENSG00000167580	AQP2	aquaporin 2 (collecting duct)	-3.74262	6.8e-56
ENSG00000140795	MYLK3	myosin light chain kinase 3	-2.71359	1.44e-32
ENSG00000213626	LBH	limb bud and heart development homolog (mouse)	-1.53648	0.0142787
ENSG00000111911	HINT3	histidine triad nucleotide binding protein 3	-2.05829	9.53e-94
ENSG00000179930	ZNF648	zinc finger protein 648	-1.22421	2.46e-07
ENSG00000140015	KCNH5	potassium voltage-gated channel, subfamily H (eag-related), member 5	-2.55312	9.6e-44
ENSG00000130177	CDC16	cell division cycle 16 homolog (S. cerevisiae)	-1.24232	3.44e-212
ENSG00000132313	MRPL35	mitochondrial ribosomal protein L35	-1.66755	4.77e-165
ENSG00000060656	PTPRU	protein tyrosine phosphatase, receptor type, U	-1.84202	2.81e-88
ENSG00000141179	PCTP	phosphatidylcholine transfer protein	-1.86582	4.17e-209
ENSG00000166794	PPIB	peptidylprolyl isomerase B (cyclophilin B)	-1.29375	9.03e-152
ENSG00000163932	PRKCD	protein kinase C, delta	-1.15663	2.32e-160
ENSG00000163527	STT3B	STT3, subunit of the oligosaccharyltransferase complex, homolog B (S. cerevisiae)	-1.48518	1.01e-231
ENSG00000010803	SCMH1	sex comb on midleg homolog 1 (Drosophila)	-1.66145	1.32e-107
ENSG00000131747	TOP2A	topoisomerase (DNA) II alpha 170kDa	-1.7795	8.58e-122
ENSG00000146409	SLC18B1	solute carrier family 18, subfamily B, member 1	-1.15381	3.4e-140
ENSG00000102924	CBLN1	cerebellin 1 precursor	-1.78709	2.48e-20
ENSG00000170348	TMED10	transmembrane emp24-like trafficking protein 10 (yeast)	-2.1947	0
ENSG00000187642	C1orf170	chromosome 1 open reading frame 170	-2.98683	1.53e-38
ENSG00000113140	SPARC	secreted protein, acidic, cysteine-rich (osteonectin)	-1.37816	2.53e-104
ENSG00000187240	DYNC2H1	dynein, cytoplasmic 2, heavy chain 1	-1.55372	1.29e-124
ENSG00000134755	DSC2	desmocollin 2	-1.28991	1.54e-28
ENSG00000248905	FMN1	formin 1	-2.08964	5.71e-176
ENSG00000158887	MPZ	myelin protein zero	-1.65609	5.5e-49
ENSG00000197102	DYNC1H1	dynein, cytoplasmic 1, heavy chain 1	-1.67228	1.13e-141
ENSG00000198162	MAN1A2	mannosidase, alpha, class 1A, member 2	-2.27527	0
ENSG00000100605	ITPK1	inositol-tetrakisphosphate 1-kinase	-1.50115	4.34e-130
ENSG00000111752	PHC1	polyhomeotic homolog 1 (Drosophila)	-1.2741	2.23e-87
ENSG00000135424	ITGA7	integrin, alpha 7	-4.38768	0
ENSG00000173918	C1QTNF1	C1q and tumor necrosis factor related protein 1	-1.05216	9.93e-09
ENSG00000126561	STAT5A	signal transducer and activator of transcription 5A	-1.22863	2.87e-66
ENSG00000127530	OR7C1	olfactory receptor, family 7, subfamily C, member 1	-3.81892	8.57e-50
ENSG00000169018	FEM1B	fem-1 homolog b (C. elegans)	-1.58	7.46e-124
ENSG00000112139	MDGA1	MAM domain containing glycosylphosphatidylinositol anchor 1	-2.7938	2.35e-172
ENSG00000157456	CCNB2	cyclin B2	-1.48107	1.31e-234
ENSG00000255302	EID1	EP300 interacting inhibitor of differentiation 1	-2.38137	8.15e-300
ENSG00000188677	PARVB	parvin, beta	-2.59952	0
ENSG00000172264	MACROD2	MACRO domain containing 2	-1.08816	2.66e-24
ENSG00000176890	TYMS	thymidylate synthetase	-1.60542	4.34e-68
ENSG00000130775	THEMIS2	thymocyte selection associated family member 2	-3.29065	6.26e-126
ENSG00000140451	PIF1	PIF1 5'-to-3' DNA helicase homolog (S. cerevisiae)	-1.69557	7.58e-72
ENSG00000123095	BHLHE41	basic helix-loop-helix family, member e41	-3.05689	1.08e-208
ENSG00000110427	KIAA1549L	KIAA1549-like	-1.48294	6.31e-122
ENSG00000142731	PLK4	polo-like kinase 4	-1.46964	7.8e-135
ENSG00000134852	CLOCK	clock homolog (mouse)	-1.38569	1.02e-112
ENSG00000139679	LPAR6	lysophosphatidic acid receptor 6	-1.36328	4.01e-45
ENSG00000157193	LRP8	low density lipoprotein receptor-related protein 8, apolipoprotein e receptor	-2.66166	0
ENSG00000136040	PLXNC1	plexin C1	-3.52382	0
ENSG00000185760	KCNQ5	potassium voltage-gated channel, KQT-like subfamily, member 5	-2.42036	0
ENSG00000139971	C14orf37	chromosome 14 open reading frame 37	-3.14721	8.82e-198
ENSG00000140386	SCAPER	S-phase cyclin A-associated protein in the ER	-1.26051	1.26e-66
ENSG00000102910	LONP2	lon peptidase 2, peroxisomal	-1.45549	1.62e-67
ENSG00000178950	GAK	cyclin G associated kinase	-1.26328	1.23e-67
ENSG00000137103	TMEM8B	transmembrane protein 8B	-1.29416	3.22e-53
ENSG00000131409	LRRC4B	leucine rich repeat containing 4B	-1.30182	2.76e-10
ENSG00000135587	SMPD2	sphingomyelin phosphodiesterase 2, neutral membrane (neutral sphingomyelinase)	-1.36748	6.16e-52
ENSG00000151240	DIP2C	DIP2 disco-interacting protein 2 homolog C (Drosophila)	-2.40047	0
ENSG00000178445	GLDC	glycine dehydrogenase (decarboxylating)	-1.50718	0.00134579
ENSG00000135299	ANKRD6	ankyrin repeat domain 6	-1.16617	2.61e-76
ENSG00000178722	C5orf64	chromosome 5 open reading frame 64	-3.14994	2.18e-36
ENSG00000187098	MITF	microphthalmia-associated transcription factor	-1.57108	7.22e-60
ENSG00000134954	ETS1	v-ets erythroblastosis virus E26 oncogene homolog 1 (avian)	-1.1335	1.42e-105
ENSG00000142233	NTN5	netrin 5	-1.0171	3.14e-13
ENSG00000130475	FCHO1	FCH domain only 1	-1.39841	2.19e-27
ENSG00000137558	PI15	peptidase inhibitor 15	-1.18399	1.13e-18
ENSG00000118298	CA14	carbonic anhydrase XIV	-1.6748	1.65e-72
ENSG00000161835	GRASP	GRP1 (general receptor for phosphoinositides 1)-associated scaffold protein	-1.4526	1.89e-77
ENSG00000138801	PAPSS1	3'-phosphoadenosine 5'-phosphosulfate synthase 1	-1.53259	6.72e-202
ENSG00000124177	CHD6	chromodomain helicase DNA binding protein 6	-1.61787	6.6e-101
ENSG00000121621	KIF18A	kinesin family member 18A	-1.11839	5.66e-86
ENSG00000111674	ENO2	enolase 2 (gamma, neuronal)	-1.74832	1.87e-256
ENSG00000142192	APP	amyloid beta (A4) precursor protein	-1.61089	7.16e-196
ENSG00000069424	KCNAB2	potassium voltage-gated channel, shaker-related subfamily, beta member 2	-3.65481	0
ENSG00000141556	TBCD	tubulin folding cofactor D	-2.11071	0
ENSG00000183508	FAM46C	family with sequence similarity 46, member C	-1.61033	5.23e-85
ENSG00000170832	USP32	ubiquitin specific peptidase 32	-1.64859	1.57e-143
ENSG00000218510	LINC00339	long intergenic non-protein coding RNA 339	-1.66465	6.79e-62
ENSG00000156381	ANKRD9	ankyrin repeat domain 9	-2.02571	2.55e-200
ENSG00000198053	SIRPA	signal-regulatory protein alpha	-1.06036	3.42e-60
ENSG00000130528	HRC	histidine rich calcium binding protein	-3.93223	8.74e-31
ENSG00000197150	ABCB8	ATP-binding cassette, sub-family B (MDR/TAP), member 8	-1.14064	3.67e-68
ENSG00000115828	QPCT	glutaminyl-peptide cyclotransferase	-2.11006	7.19e-208
ENSG00000204632	HLA-G	major histocompatibility complex, class I, G	-2.33321	1.26e-264
ENSG00000140009	ESR2	estrogen receptor 2 (ER beta)	-1.16363	4.33e-33
ENSG00000165914	TTC7B	tetratricopeptide repeat domain 7B	-1.12409	6.49e-54
ENSG00000124839	RAB17	RAB17, member RAS oncogene family	-1.61191	1.93e-168
ENSG00000115317	HTRA2	HtrA serine peptidase 2	-1.26105	2.43e-104
ENSG00000248746	ACTN3	actinin, alpha 3	-1.44223	1.35e-15
ENSG00000137809	ITGA11	integrin, alpha 11	-3.5477	2.26e-31
ENSG00000145882	PCYOX1L	prenylcysteine oxidase 1 like	-2.09672	1.68e-166
ENSG00000023902	PLEKHO1	pleckstrin homology domain containing, family O member 1	-1.63453	2.43e-104
ENSG00000154359	LONRF1	LON peptidase N-terminal domain and ring finger 1	-2.31985	0
ENSG00000152240	HAUS1	HAUS augmin-like complex, subunit 1	-1.45192	9.58e-40
ENSG00000264063	MIR3687	microRNA 3687	-1.02348	7.16e-06
ENSG00000124818	OPN5	opsin 5	-3.19585	3.73e-32
ENSG00000154025	SLC5A10	solute carrier family 5 (sodium/glucose cotransporter), member 10	-4.35353	1.67e-71
ENSG00000100714	MTHFD1	methylenetetrahydrofolate dehydrogenase (NADP+ dependent) 1, methenyltetrahydrofolate cyclohydrolase, formyltetrahydrofolate synthetase	-1.16503	4.36e-44
ENSG00000069702	TGFBR3	transforming growth factor, beta receptor III	-2.0157	2.78e-126
ENSG00000097007	ABL1	c-abl oncogene 1, non-receptor tyrosine kinase	-1.17381	7.24e-104
ENSG00000107317	PTGDS	prostaglandin D2 synthase 21kDa (brain)	-6.32019	4.57e-30
ENSG00000182504	CEP97	centrosomal protein 97kDa	-1.05572	1.2e-66
ENSG00000119227	PIGZ	phosphatidylinositol glycan anchor biosynthesis, class Z	-3.4643	6.49e-179
ENSG00000079246	XRCC5	X-ray repair complementing defective repair in Chinese hamster cells 5 (double-strand-break rejoining)	-1.02846	7.23e-100
ENSG00000145819	ARHGAP26	Rho GTPase activating protein 26	-1.23004	1.76e-99
ENSG00000007968	E2F2	E2F transcription factor 2	-1.12945	2.35e-29
ENSG00000028203	VEZT	vezatin, adherens junctions transmembrane protein	-1.60435	5.09e-180
ENSG00000197006	METTL9	methyltransferase like 9	-1.43763	8.71e-109
ENSG00000188649	CC2D2B	coiled-coil and C2 domain containing 2B	-3.63559	1.06e-33
ENSG00000104763	ASAH1	N-acylsphingosine amidohydrolase (acid ceramidase) 1	-2.23929	0
ENSG00000214140	PRCD	progressive rod-cone degeneration	-2.03883	1.46e-84
ENSG00000155903	RASA2	RAS p21 protein activator 2	-1.36527	2.54e-221
ENSG00000198892	SHISA4	shisa homolog 4 (Xenopus laevis)	-1.48836	1.01e-44
ENSG00000184922	FMNL1	formin-like 1	-2.08858	5.24e-42
ENSG00000118193	KIF14	kinesin family member 14	-2.03534	0
ENSG00000026297	RNASET2	ribonuclease T2	-1.18881	3.34e-98
ENSG00000064886	CHI3L2	chitinase 3-like 2	-2.04594	7.71e-25
ENSG00000088812	ATRN	attractin	-1.32451	1.88e-152
ENSG00000171227	TMEM37	transmembrane protein 37	-3.18419	3.79e-25
ENSG00000189171	S100A13	S100 calcium binding protein A13	-1.38232	5.47e-70
ENSG00000117859	OSBPL9	oxysterol binding protein-like 9	-1.38768	1.65e-143
ENSG00000092931	MFSD11	major facilitator superfamily domain containing 11	-1.05145	3.93e-83
ENSG00000137449	CPEB2	cytoplasmic polyadenylation element binding protein 2	-1.38172	2.99e-147
ENSG00000164330	EBF1	early B-cell factor 1	-1.90795	1.54e-21
ENSG00000056998	GYG2	glycogenin 2	-2.09291	1.55e-235
ENSG00000173950	XXYLT1	xyloside xylosyltransferase 1	-1.20953	1.05e-133
ENSG00000100697	DICER1	dicer 1, ribonuclease type III	-1.47054	9.23e-67
ENSG00000168078	PBK	PDZ binding kinase	-1.91489	0
ENSG00000172531	PPP1CA	protein phosphatase 1, catalytic subunit, alpha isozyme	-1.26738	7.13e-128
ENSG00000109610	SOD3	superoxide dismutase 3, extracellular	-3.78325	1.79e-34
ENSG00000065243	PKN2	protein kinase N2	-1.13897	5.48e-83
ENSG00000153774	CFDP1	craniofacial development protein 1	-1.07421	1.75e-165
ENSG00000068784	SRBD1	S1 RNA binding domain 1	-1.26921	6.46e-86
ENSG00000138413	IDH1	isocitrate dehydrogenase 1 (NADP+), soluble	-1.53928	2.11e-102
ENSG00000113504	SLC12A7	solute carrier family 12 (potassium/chloride transporters), member 7	-1.11673	1.76e-40
ENSG00000007237	GAS7	growth arrest-specific 7	-2.87787	0
ENSG00000051382	PIK3CB	phosphatidylinositol-4,5-bisphosphate 3-kinase, catalytic subunit beta	-2.08483	7.48e-182
ENSG00000143398	PIP5K1A	phosphatidylinositol-4-phosphate 5-kinase, type I, alpha	-1.0911	0
ENSG00000260456	C16orf95	Uncharacterized protein C16orf95	-2.18761	1.5e-30
ENSG00000126353	CCR7	chemokine (C-C motif) receptor 7	-3.3103	1.39e-34
ENSG00000162591	MEGF6	multiple EGF-like-domains 6	-1.22629	9.73e-13
ENSG00000047346	FAM214A	family with sequence similarity 214, member A	-1.0474	5.69e-104
ENSG00000196482	ESRRG	estrogen-related receptor gamma	-1.43649	3.97e-21
ENSG00000101265	RASSF2	Ras association (RalGDS/AF-6) domain family member 2	-1.9866	1.23e-185
ENSG00000142875	PRKACB	protein kinase, cAMP-dependent, catalytic, beta	-1.85591	2.08e-172
ENSG00000168827	GFM1	G elongation factor, mitochondrial 1	-1.72459	1.19e-240
ENSG00000090565	RAB11FIP3	RAB11 family interacting protein 3 (class II)	-1.03927	4.26e-108
ENSG00000127483	HP1BP3	heterochromatin protein 1, binding protein 3	-1.53346	0
ENSG00000196666	FAM180B	family with sequence similarity 180, member B	-1.85779	9.79e-32
ENSG00000111886	GABRR2	gamma-aminobutyric acid (GABA) A receptor, rho 2	-1.00692	6.17e-05
ENSG00000162434	JAK1	Janus kinase 1	-1.44704	0
ENSG00000176533	GNG7	guanine nucleotide binding protein (G protein), gamma 7	-1.32202	1.52e-75
ENSG00000005893	LAMP2	lysosomal-associated membrane protein 2	-1.29871	4.03e-122
ENSG00000196396	PTPN1	protein tyrosine phosphatase, non-receptor type 1	-2.14664	0
ENSG00000241697	TMEFF1	transmembrane protein with EGF-like and two follistatin-like domains 1	-3.07635	1.32e-47
ENSG00000232119	MCTS1	malignant T cell amplified sequence 1	-1.05134	2.91e-22
ENSG00000074696	PTPLAD1	protein tyrosine phosphatase-like A domain containing 1	-1.01878	3.07e-54
ENSG00000134982	APC	adenomatous polyposis coli	-1.42499	1.2e-119
ENSG00000117650	NEK2	NIMA (never in mitosis gene a)-related kinase 2	-1.2626	5.07e-153
ENSG00000063015	SEZ6	seizure related 6 homolog (mouse)	-1.56271	3.62e-15
ENSG00000164989	CCDC171	coiled-coil domain containing 171	-2.425	4.8e-102
ENSG00000185129	PURA	purine-rich element binding protein A	-1.02109	1.7e-112
ENSG00000136943	CTSL2	cathepsin L2	-1.14244	2.29e-56
ENSG00000065060	UHRF1BP1	UHRF1 binding protein 1	-1.28243	2.39e-40
ENSG00000111783	RFX4	regulatory factor X, 4 (influences HLA class II expression)	-2.92228	3.89e-28
ENSG00000137491	SLCO2B1	solute carrier organic anion transporter family, member 2B1	-3.07165	8.43e-29
ENSG00000123106	CCDC91	coiled-coil domain containing 91	-1.82934	6.84e-85
ENSG00000177054	ZDHHC13	zinc finger, DHHC-type containing 13	-1.82171	1.31e-158
ENSG00000174080	CTSF	cathepsin F	-3.30021	0
ENSG00000102904	TSNAXIP1	translin-associated factor X interacting protein 1	-1.50668	4.59e-36
ENSG00000163939	PBRM1	polybromo 1	-2.36646	6.31e-268
ENSG00000142606	MMEL1	membrane metallo-endopeptidase-like 1	-5.68918	2.3e-26
ENSG00000146122	DAAM2	dishevelled associated activator of morphogenesis 2	-1.37657	4.14e-156
ENSG00000013523	ANGEL1	angel homolog 1 (Drosophila)	-1.14833	2.84e-197
ENSG00000145386	CCNA2	cyclin A2	-1.08591	1.93e-55
ENSG00000134909	ARHGAP32	Rho GTPase activating protein 32	-1.12595	8.07e-75
ENSG00000062038	CDH3	cadherin 3, type 1, P-cadherin (placental)	-1.80668	3.92e-124
ENSG00000152402	GUCY1A2	guanylate cyclase 1, soluble, alpha 2	-1.92554	2.88e-47
ENSG00000182580	EPHB3	EPH receptor B3	-1.89828	1.02e-25
ENSG00000117090	SLAMF1	signaling lymphocytic activation molecule family member 1	-4.06229	1.56e-31
ENSG00000132429	POPDC3	popeye domain containing 3	-1.05206	1.16e-34
ENSG00000145348	TBCK	TBC1 domain containing kinase	-1.17838	8.13e-110
ENSG00000006715	VPS41	vacuolar protein sorting 41 homolog (S. cerevisiae)	-1.19784	3.78e-182
ENSG00000138160	KIF11	kinesin family member 11	-1.59127	1.61e-87
ENSG00000168310	IRF2	interferon regulatory factor 2	-1.24911	7.63e-112
ENSG00000173486	FKBP2	FK506 binding protein 2, 13kDa	-1.34741	5.46e-126
ENSG00000143369	ECM1	extracellular matrix protein 1	-3.87382	0
ENSG00000196776	CD47	CD47 molecule	-1.09519	8.94e-69
ENSG00000185010	F8	coagulation factor VIII, procoagulant component	-1.21695	5.74e-05
ENSG00000123201	GUCY1B2	guanylate cyclase 1, soluble, beta 2 (pseudogene)	-1.82608	1.89e-17
ENSG00000078804	TP53INP2	tumor protein p53 inducible nuclear protein 2	-1.8228	1.75e-298
ENSG00000038002	AGA	aspartylglucosaminidase	-2.05766	3.7e-152
ENSG00000226869	LHFPL3-AS1	LHFPL3 antisense RNA 1	-3.3357	1.86e-148
ENSG00000105639	JAK3	Janus kinase 3	-1.78451	2.8e-25
ENSG00000198718	FAM179B	family with sequence similarity 179, member B	-1.6577	2.66e-150
ENSG00000063601	MTMR1	myotubularin related protein 1	-1.01027	5.53e-40
ENSG00000171714	ANO5	anoctamin 5	-1.80693	1.02e-63
ENSG00000107864	CPEB3	cytoplasmic polyadenylation element binding protein 3	-1.07238	1.76e-28
ENSG00000116586	LAMTOR2	late endosomal/lysosomal adaptor, MAPK and MTOR activator 2	-1.09798	8.77e-46
ENSG00000101350	KIF3B	kinesin family member 3B	-1.39742	2.05e-292
ENSG00000169856	ONECUT1	one cut homeobox 1	-1.11513	1.33e-12
ENSG00000086504	MRPL28	mitochondrial ribosomal protein L28	-1.53631	8.16e-180
ENSG00000023516	AKAP11	A kinase (PRKA) anchor protein 11	-1.57161	2.92e-143
ENSG00000151287	TEX30	testis expressed 30	-1.06894	3.35e-133
ENSG00000225485	ARHGAP23	Rho GTPase activating protein 23	-1.41858	1.59e-49
ENSG00000166189	HPS6	Hermansky-Pudlak syndrome 6	-1.22186	1.33e-144
ENSG00000119397	CNTRL	centriolin	-1.83192	1.45e-153
ENSG00000103507	BCKDK	branched chain ketoacid dehydrogenase kinase	-1.13466	2.08e-112
ENSG00000116199	FAM20B	family with sequence similarity 20, member B	-1.37268	1.26e-103
ENSG00000108784	NAGLU	N-acetylglucosaminidase, alpha	-2.35187	6.9e-290
ENSG00000172270	BSG	basigin (Ok blood group)	-1.08464	6.25e-89
ENSG00000124155	PIGT	phosphatidylinositol glycan anchor biosynthesis, class T	-1.1377	7.97e-116
ENSG00000141542	RAB40B	RAB40B, member RAS oncogene family	-1.24313	2.32e-71
ENSG00000167112	TRUB2	TruB pseudouridine (psi) synthase homolog 2 (E. coli)	-1.13855	2.77e-97
ENSG00000112033	PPARD	peroxisome proliferator-activated receptor delta	-1.14865	3.19e-99
ENSG00000139832	RAB20	RAB20, member RAS oncogene family	-2.04786	6.39e-231
ENSG00000160050	CCDC28B	coiled-coil domain containing 28B	-1.12785	1.32e-50
ENSG00000171885	AQP4	aquaporin 4	-3.22697	5.15e-29
ENSG00000163449	TMEM169	transmembrane protein 169	-1.56805	3.22e-12
ENSG00000105220	GPI	glucose-6-phosphate isomerase	-1.1735	1.66e-147
ENSG00000136982	DSCC1	defective in sister chromatid cohesion 1 homolog (S. cerevisiae)	-1.54775	6.78e-49
ENSG00000171357	LURAP1	leucine rich adaptor protein 1	-1.85794	9.8e-60
ENSG00000087076	HSD17B14	hydroxysteroid (17-beta) dehydrogenase 14	-1.68161	3.51e-159
ENSG00000170276	HSPB2	Heat shock protein beta-2	-2.93025	6.08e-05
ENSG00000149311	ATM	ataxia telangiectasia mutated	-1.33938	9.68e-44
ENSG00000245694	CRNDE	colorectal neoplasia differentially expressed (non-protein coding)	-1.00066	6.07e-19
ENSG00000171368	TPPP	tubulin polymerization promoting protein	-2.07822	0
ENSG00000169220	RGS14	regulator of G-protein signaling 14	-1.32799	2.59e-60
ENSG00000151233	GXYLT1	glucoside xylosyltransferase 1	-1.36705	1.44e-120
ENSG00000184831	APOO	apolipoprotein O	-1.44889	2.43e-111
ENSG00000105875	WDR91	WD repeat domain 91	-2.11213	0
ENSG00000164076	CAMKV	CaM kinase-like vesicle-associated	-1.47488	9.1e-11
ENSG00000006576	PHTF2	putative homeodomain transcription factor 2	-1.13545	1.26e-72
ENSG00000228789	HCG22	HLA complex group 22 (non-protein coding)	-1.84544	1.39e-11
ENSG00000183337	BCOR	BCL6 corepressor	-2.91506	7.3e-220
ENSG00000197930	ERO1L	ERO1-like (S. cerevisiae)	-1.21911	7.19e-125
ENSG00000095370	SH2D3C	SH2 domain containing 3C	-3.15379	8.87e-28
ENSG00000151623	NR3C2	nuclear receptor subfamily 3, group C, member 2	-1.02244	1.19e-08
ENSG00000068489	PRR11	proline rich 11	-1.89205	2.06e-152
ENSG00000185640	KRT79	keratin 79	-5.00131	4.8e-35
ENSG00000176771	NCKAP5	NCK-associated protein 5	-2.00344	2.98e-25
ENSG00000197959	DNM3	dynamin 3	-1.1825	7.23e-45
ENSG00000247556	OIP5-AS1	OIP5 antisense RNA 1	-1.64259	9.89e-149
ENSG00000100146	SOX10	SRY (sex determining region Y)-box 10	-2.4635	0
ENSG00000174456	C12orf76	chromosome 12 open reading frame 76	-1.11483	1.49e-57
ENSG00000163629	PTPN13	protein tyrosine phosphatase, non-receptor type 13 (APO-1/CD95 (Fas)-associated phosphatase)	-1.54726	1.42e-78
ENSG00000136275	C7orf69	chromosome 7 open reading frame 69	-1.46477	2.17e-10
ENSG00000121879	PIK3CA	phosphatidylinositol-4,5-bisphosphate 3-kinase, catalytic subunit alpha	-1.31932	3.33e-207
ENSG00000171450	CDK5R2	cyclin-dependent kinase 5, regulatory subunit 2 (p39)	-2.36667	2.18e-19
ENSG00000072163	LIMS2	LIM and senescent cell antigen-like domains 2	-1.9374	5.06e-13
ENSG00000136738	STAM	signal transducing adaptor molecule (SH3 domain and ITAM motif) 1	-2.27756	0
ENSG00000126777	KTN1	kinectin 1 (kinesin receptor)	-2.43084	0
ENSG00000196782	MAML3	mastermind-like 3 (Drosophila)	-1.07282	5.63e-34
ENSG00000111790	FGFR1OP2	FGFR1 oncogene partner 2	-1.0896	3.53e-59
ENSG00000070018	LRP6	low density lipoprotein receptor-related protein 6	-1.31402	1.37e-276
ENSG00000146828	SLC12A9	solute carrier family 12 (potassium/chloride transporters), member 9	-1.29557	6.76e-110
ENSG00000125124	BBS2	Bardet-Biedl syndrome 2	-1.00882	8.57e-33
ENSG00000176402	GJC3	gap junction protein, gamma 3, 30.2kDa	-2.22783	7.72e-15
ENSG00000065054	SLC9A3R2	solute carrier family 9, subfamily A (NHE3, cation proton antiporter 3), member 3 regulator 2	-1.08304	4.41e-25
ENSG00000146729	GBAS	glioblastoma amplified sequence	-1.99531	0
ENSG00000099797	TECR	trans-2,3-enoyl-CoA reductase	-2.09359	2.14e-301
ENSG00000153283	CD96	CD96 molecule	-1.37189	5.26e-05
ENSG00000147526	TACC1	transforming, acidic coiled-coil containing protein 1	-2.40498	0
ENSG00000145354	CISD2	CDGSH iron sulfur domain 2	-1.46886	7.7e-102
ENSG00000164849	GPR146	G protein-coupled receptor 146	-1.15134	3.06e-16
ENSG00000163568	AIM2	absent in melanoma 2	-1.67323	0.0068587
ENSG00000205838	TTC23L	tetratricopeptide repeat domain 23-like	-1.01412	1.72e-09
ENSG00000168528	SERINC2	serine incorporator 2	-1.60279	4.08e-24
ENSG00000103540	CCP110	centriolar coiled coil protein 110kDa	-1.36803	6.29e-62
ENSG00000105643	ARRDC2	arrestin domain containing 2	-2.01996	7.29e-260
ENSG00000167371	PRRT2	proline-rich transmembrane protein 2	-2.01885	6.27e-20
ENSG00000152154	TMEM178A	transmembrane protein 178A	-1.9475	3.34e-16
ENSG00000102181	CD99L2	CD99 molecule-like 2	-2.79296	0
ENSG00000196132	MYT1	myelin transcription factor 1	-2.34689	1.58e-14
ENSG00000214253	FIS1	fission 1 (mitochondrial outer membrane) homolog (S. cerevisiae)	-1.09554	2.1e-115
ENSG00000128253	RFPL2	ret finger protein-like 2	-2.10288	6.79e-15
ENSG00000125434	SLC25A35	solute carrier family 25, member 35	-2.22411	3.63e-106
ENSG00000169692	AGPAT2	1-acylglycerol-3-phosphate O-acyltransferase 2 (lysophosphatidic acid acyltransferase, beta)	-2.09262	1.25e-265
ENSG00000090686	USP48	ubiquitin specific peptidase 48	-1.33918	7.98e-260
ENSG00000162729	IGSF8	immunoglobulin superfamily, member 8	-2.7983	0
ENSG00000131374	TBC1D5	TBC1 domain family, member 5	-1.14049	2.73e-37
ENSG00000052126	PLEKHA5	pleckstrin homology domain containing, family A member 5	-1.94147	0
ENSG00000125388	GRK4	G protein-coupled receptor kinase 4	-1.23789	9.27e-59
ENSG00000065717	TLE2	transducin-like enhancer of split 2 (E(sp1) homolog, Drosophila)	-3.30048	1.72e-68
ENSG00000198755	RPL10A	ribosomal protein L10a	-1.54084	9.55e-133
ENSG00000127481	UBR4	ubiquitin protein ligase E3 component n-recognin 4	-1.1495	1.73e-72
ENSG00000160695	VPS11	vacuolar protein sorting 11 homolog (S. cerevisiae)	-1.15697	2.24e-111
ENSG00000165672	PRDX3	peroxiredoxin 3	-1.20475	2.65e-122
ENSG00000185522	C11orf35	chromosome 11 open reading frame 35	-1.72558	1.43e-61
ENSG00000110871	COQ5	coenzyme Q5 homolog, methyltransferase (S. cerevisiae)	-1.75707	0
ENSG00000160219	GAB3	GRB2-associated binding protein 3	-1.73048	1.68e-10
ENSG00000130270	ATP8B3	ATPase, aminophospholipid transporter, class I, type 8B, member 3	-2.02131	3.89e-26
ENSG00000111642	CHD4	chromodomain helicase DNA binding protein 4	-1.51343	0
ENSG00000198836	OPA1	optic atrophy 1 (autosomal dominant)	-1.38173	1.31e-114
ENSG00000184925	LCN12	lipocalin 12	-2.21455	5.14e-17
ENSG00000151725	MLF1IP	MLF1 interacting protein	-1.637	5.61e-98
ENSG00000163884	KLF15	Kruppel-like factor 15	-1.65761	5.64e-73
ENSG00000177602	GSG2	germ cell associated 2 (haspin)	-1.24224	5.55e-27
ENSG00000196535	MYO18A	myosin XVIIIA	-1.16518	4.05e-111
ENSG00000235821	IFITM4P	interferon induced transmembrane protein 4 pseudogene	-1.67308	3.97e-11
ENSG00000186583	SPATC1	spermatogenesis and centriole associated 1	-1.40756	4.3e-07
ENSG00000164403	SHROOM1	shroom family member 1	-1.02396	2.41e-12
ENSG00000082805	ERC1	ELKS/RAB6-interacting/CAST family member 1	-1.17049	5.54e-34
ENSG00000152642	GPD1L	glycerol-3-phosphate dehydrogenase 1-like	-1.65184	6.69e-42
ENSG00000090534	THPO	thrombopoietin	-1.73183	9.84e-10
ENSG00000182612	TSPAN10	tetraspanin 10	-3.25897	0
ENSG00000008382	MPND	MPN domain containing	-1.1076	1.98e-16
ENSG00000134955	SLC37A2	solute carrier family 37 (glycerol-3-phosphate transporter), member 2	-1.90612	7.71e-98
ENSG00000008513	ST3GAL1	ST3 beta-galactoside alpha-2,3-sialyltransferase 1	-2.34968	7.19e-250
ENSG00000173281	PPP1R3B	protein phosphatase 1, regulatory subunit 3B	-1.55094	1.08e-115
ENSG00000110237	ARHGEF17	Rho guanine nucleotide exchange factor (GEF) 17	-1.63337	1.31e-82
ENSG00000183172	C22orf32	chromosome 22 open reading frame 32	-1.03074	8.07e-22
ENSG00000025796	SEC63	SEC63 homolog (S. cerevisiae)	-1.07368	1.97e-234
ENSG00000174156	GSTA3	glutathione S-transferase alpha 3	-2.31711	1.46e-12
ENSG00000170264	FAM161A	family with sequence similarity 161, member A	-1.34646	7.22e-37
ENSG00000107581	EIF3A	eukaryotic translation initiation factor 3, subunit A	-1.44645	0
ENSG00000162522	KIAA1522	KIAA1522	-1.28534	2.89e-213
ENSG00000179588	ZFPM1	zinc finger protein, multitype 1	-1.223	1.27e-21
ENSG00000126895	AVPR2	arginine vasopressin receptor 2	-1.74548	7.28e-06
ENSG00000061938	TNK2	tyrosine kinase, non-receptor, 2	-1.01801	4.14e-54
ENSG00000136161	RCBTB2	regulator of chromosome condensation (RCC1) and BTB (POZ) domain containing protein 2	-1.56609	1.7e-113
ENSG00000134057	CCNB1	cyclin B1	-1.98296	0
ENSG00000161395	PGAP3	post-GPI attachment to proteins 3	-1.40238	9.01e-43
ENSG00000095932	C19orf77	chromosome 19 open reading frame 77	-2.46708	2.25e-09
ENSG00000146433	TMEM181	transmembrane protein 181	-1.30279	1.14e-258
ENSG00000067064	IDI1	isopentenyl-diphosphate delta isomerase 1	-1.40856	1.56e-103
ENSG00000119772	DNMT3A	DNA (cytosine-5-)-methyltransferase 3 alpha	-1.57253	7.6e-68
ENSG00000108175	ZMIZ1	zinc finger, MIZ-type containing 1	-1.70624	0
ENSG00000188662	HILS1	histone linker H1 domain, spermatid-specific 1, pseudogene	-1.74745	2.32e-24
ENSG00000136854	STXBP1	syntaxin binding protein 1	-2.34176	0
ENSG00000122970	IFT81	intraflagellar transport 81 homolog (Chlamydomonas)	-1.88996	9.53e-279
ENSG00000115325	DOK1	docking protein 1, 62kDa (downstream of tyrosine kinase 1)	-1.08464	7.41e-06
ENSG00000198900	TOP1	topoisomerase (DNA) I	-1.19965	0
ENSG00000159082	SYNJ1	synaptojanin 1	-1.69403	0
ENSG00000241839	PLEKHO2	pleckstrin homology domain containing, family O member 2	-1.54358	0
ENSG00000117305	HMGCL	3-hydroxymethyl-3-methylglutaryl-CoA lyase	-1.24838	2.3e-123
ENSG00000228544	KIAA1984-AS1	KIAA1984 antisense RNA 1	-1.82075	9.1e-46
ENSG00000111666	CHPT1	choline phosphotransferase 1	-2.72956	0
ENSG00000138796	HADH	hydroxyacyl-CoA dehydrogenase	-2.01812	5.64e-112
ENSG00000149503	INCENP	inner centromere protein antigens 135/155kDa	-1.40017	2.57e-190
ENSG00000182718	ANXA2	annexin A2	-1.5725	7.16e-263
ENSG00000005249	PRKAR2B	protein kinase, cAMP-dependent, regulatory, type II, beta	-1.18385	3.89e-53
ENSG00000129990	SYT5	synaptotagmin V	-1.83259	1.83e-24
ENSG00000049246	PER3	period homolog 3 (Drosophila)	-1.60483	4.25e-90
ENSG00000186834	HEXIM1	hexamethylene bis-acetamide inducible 1	-1.96371	6.11e-134
ENSG00000101986	ABCD1	ATP-binding cassette, sub-family D (ALD), member 1	-1.7191	1.96e-154
ENSG00000141562	NARF	nuclear prelamin A recognition factor	-1.13552	1.19e-154
ENSG00000111670	GNPTAB	N-acetylglucosamine-1-phosphate transferase, alpha and beta subunits	-1.45452	9.95e-107
ENSG00000068831	RASGRP2	RAS guanyl releasing protein 2 (calcium and DAG-regulated)	-2.52459	6.7e-14
ENSG00000134243	SORT1	sortilin 1	-1.0902	1.29e-71
ENSG00000046653	GPM6B	glycoprotein M6B	-2.71344	5.52e-210
ENSG00000107611	CUBN	cubilin (intrinsic factor-cobalamin receptor)	-1.56899	1.27e-84
ENSG00000133943	C14orf159	chromosome 14 open reading frame 159	-1.28841	1.16e-101
ENSG00000150867	PIP4K2A	phosphatidylinositol-5-phosphate 4-kinase, type II, alpha	-1.21167	1.63e-46
ENSG00000118217	ATF6	activating transcription factor 6	-1.07912	1.22e-62
ENSG00000154654	NCAM2	neural cell adhesion molecule 2	-2.39851	1.66e-202
ENSG00000089876	DHX32	DEAH (Asp-Glu-Ala-His) box polypeptide 32	-1.05388	1.34e-77
ENSG00000014641	MDH1	malate dehydrogenase 1, NAD (soluble)	-1.90382	0
ENSG00000052795	FNIP2	folliculin interacting protein 2	-2.7709	0
ENSG00000183023	SLC8A1	solute carrier family 8 (sodium/calcium exchanger), member 1	-2.62726	4.45e-71
ENSG00000135968	GCC2	GRIP and coiled-coil domain containing 2	-1.25847	8.45e-238
ENSG00000121691	CAT	catalase	-1.12046	7.7e-88
ENSG00000095059	DHPS	deoxyhypusine synthase	-1.04083	4.69e-111
ENSG00000203859	HSD3B2	hydroxy-delta-5-steroid dehydrogenase, 3 beta- and steroid delta-isomerase 2	-2.08768	3.34e-10
ENSG00000164904	ALDH7A1	aldehyde dehydrogenase 7 family, member A1	-1.67022	2.46e-174
ENSG00000162688	AGL	amylo-alpha-1, 6-glucosidase, 4-alpha-glucanotransferase	-1.1754	1.34e-57
ENSG00000128059	PPAT	phosphoribosyl pyrophosphate amidotransferase	-1.38826	4.08e-153
ENSG00000135828	RNASEL	ribonuclease L (2',5'-oligoisoadenylate synthetase-dependent)	-1.05829	4.75e-41
ENSG00000241399	CD302	CD302 molecule	-1.64636	1.52e-50
ENSG00000127241	MASP1	mannan-binding lectin serine peptidase 1 (C4/C2 activating component of Ra-reactive factor)	-1.36888	5.71e-07
ENSG00000154511	FAM69A	family with sequence similarity 69, member A	-4.76104	0
ENSG00000177875	C12orf68	chromosome 12 open reading frame 68	-1.30706	0.014687
ENSG00000106443	PHF14	PHD finger protein 14	-1.05123	1.32e-192
ENSG00000169826	CSGALNACT2	chondroitin sulfate N-acetylgalactosaminyltransferase 2	-1.06478	1e-105
ENSG00000143641	GALNT2	UDP-N-acetyl-alpha-D-galactosamine:polypeptide N-acetylgalactosaminyltransferase 2 (GalNAc-T2)	-1.94954	0
ENSG00000196704	AMZ2	archaelysin family metallopeptidase 2	-1.366	2.16e-260
ENSG00000139737	SLAIN1	SLAIN motif family, member 1	-2.30785	9.33e-144
ENSG00000117724	CENPF	centromere protein F, 350/400kDa (mitosin)	-3.02133	0
ENSG00000144485	HES6	hairy and enhancer of split 6 (Drosophila)	-1.31949	5.77e-43
ENSG00000168615	ADAM9	ADAM metallopeptidase domain 9	-1.40823	8.91e-114
ENSG00000115073	ACTR1B	ARP1 actin-related protein 1 homolog B, centractin beta (yeast)	-1.32775	5.52e-131
ENSG00000169738	DCXR	dicarbonyl/L-xylulose reductase	-1.70614	3.16e-132
ENSG00000004897	CDC27	cell division cycle 27 homolog (S. cerevisiae)	-1.51663	0
ENSG00000187676	B3GALTL	beta 1,3-galactosyltransferase-like	-2.07907	2.21e-179
ENSG00000197557	TTC30A	tetratricopeptide repeat domain 30A	-1.45211	1.6e-40
ENSG00000105655	ISYNA1	inositol-3-phosphate synthase 1	-1.46064	1.1e-64
ENSG00000115504	EHBP1	EH domain binding protein 1	-1.4677	1.55e-193
ENSG00000128951	DUT	deoxyuridine triphosphatase	-1.68403	1.54e-151
ENSG00000053747	LAMA3	laminin, alpha 3	-1.67006	4.76e-21
ENSG00000015285	WAS	Wiskott-Aldrich syndrome	-2.10478	2.79e-14
ENSG00000137070	IL11RA	interleukin 11 receptor, alpha	-1.77634	3.47e-168
ENSG00000112118	MCM3	minichromosome maintenance complex component 3	-1.00962	7.62e-46
ENSG00000149743	TRPT1	tRNA phosphotransferase 1	-1.14696	2.72e-73
ENSG00000198231	DDX42	DEAD (Asp-Glu-Ala-Asp) box polypeptide 42	-1.00375	8.08e-283
ENSG00000101160	CTSZ	cathepsin Z	-1.07253	1.27e-68
ENSG00000163626	COX18	COX18 cytochrome c oxidase assembly homolog (S. cerevisiae)	-1.10938	1.09e-19
ENSG00000070526	ST6GALNAC1	ST6 (alpha-N-acetyl-neuraminyl-2,3-beta-galactosyl-1,3)-N-acetylgalactosaminide alpha-2,6-sialyltransferase 1	-3.2516	1.45e-16
ENSG00000079739	PGM1	phosphoglucomutase 1	-2.09294	1.97e-159
ENSG00000115355	CCDC88A	coiled-coil domain containing 88A	-1.54352	1.99e-106
ENSG00000116031	CD207	CD207 molecule, langerin	-1.2845	2.45e-07
ENSG00000163006	CCDC138	coiled-coil domain containing 138	-1.32488	5.51e-23
ENSG00000138316	ADAMTS14	ADAM metallopeptidase with thrombospondin type 1 motif, 14	-4.74328	1.95e-18
ENSG00000162636	FAM102B	family with sequence similarity 102, member B	-1.63769	1.09e-100
ENSG00000174125	TLR1	toll-like receptor 1	-1.22334	1.54e-05
ENSG00000164690	SHH	sonic hedgehog	-2.49232	1.26e-09
ENSG00000138600	SPPL2A	signal peptide peptidase like 2A	-1.27495	1.38e-123
ENSG00000116525	TRIM62	tripartite motif containing 62	-2.1956	3.04e-169
ENSG00000125445	MRPS7	mitochondrial ribosomal protein S7	-1.28037	2.09e-225
ENSG00000184207	PGP	phosphoglycolate phosphatase	-1.22986	6.62e-51
ENSG00000204217	BMPR2	bone morphogenetic protein receptor, type II (serine/threonine kinase)	-1.04322	2.13e-47
ENSG00000148362	C9orf142	chromosome 9 open reading frame 142	-1.08113	1.7e-11
ENSG00000159496	RGL4	ral guanine nucleotide dissociation stimulator-like 4	-1.24225	8.84e-13
ENSG00000057935	MTA3	metastasis associated 1 family, member 3	-1.09893	9.28e-210
ENSG00000171680	PLEKHG5	pleckstrin homology domain containing, family G (with RhoGef domain) member 5	-1.70936	2.45e-64
ENSG00000100979	PLTP	phospholipid transfer protein	-1.92472	4.71e-287
ENSG00000118369	USP35	ubiquitin specific peptidase 35	-1.85688	0
ENSG00000142619	PADI3	peptidyl arginine deiminase, type III	-3.42833	2.32e-26
ENSG00000204052	LRRC73	leucine rich repeat containing 73	-2.31126	4.01e-20
ENSG00000213079	SCAF8	SR-related CTD-associated factor 8	-1.22576	2.67e-116
ENSG00000110011	DNAJC4	DnaJ (Hsp40) homolog, subfamily C, member 4	-1.04899	8.6e-109
ENSG00000196659	TTC30B	tetratricopeptide repeat domain 30B	-2.6654	2.6e-75
ENSG00000188763	FZD9	frizzled family receptor 9	-2.30327	2.19e-19
ENSG00000137124	ALDH1B1	aldehyde dehydrogenase 1 family, member B1	-1.81237	3.95e-49
ENSG00000136381	IREB2	iron-responsive element binding protein 2	-1.28204	4.18e-202
ENSG00000126261	UBA2	ubiquitin-like modifier activating enzyme 2	-1.07109	1.22e-73
ENSG00000165816	VWA2	von Willebrand factor A domain containing 2	-3.01603	2.54e-09
ENSG00000071575	TRIB2	tribbles homolog 2 (Drosophila)	-1.7169	1.22e-102
ENSG00000144118	RALB	v-ral simian leukemia viral oncogene homolog B (ras related; GTP binding protein)	-2.63284	0
ENSG00000128694	OSGEPL1	O-sialoglycoprotein endopeptidase-like 1	-1.15051	9.42e-51
ENSG00000124440	HIF3A	hypoxia inducible factor 3, alpha subunit	-2.09143	3.33e-07
ENSG00000148672	GLUD1	glutamate dehydrogenase 1	-1.02054	1.14e-60
ENSG00000100036	SLC35E4	solute carrier family 35, member E4	-1.07724	7.2e-61
ENSG00000184232	OAF	OAF homolog (Drosophila)	-2.31948	5.98e-276
ENSG00000139921	TMX1	thioredoxin-related transmembrane protein 1	-1.22733	4.43e-156
ENSG00000156831	NSMCE2	non-SMC element 2, MMS21 homolog (S. cerevisiae)	-1.01189	3.35e-66
ENSG00000140299	BNIP2	BCL2/adenovirus E1B 19kDa interacting protein 2	-1.08575	2.41e-79
ENSG00000154162	CDH12	cadherin 12, type 2 (N-cadherin 2)	-1.39331	1.64e-05
ENSG00000091513	TF	transferrin	-1.19911	1.34e-06
ENSG00000203855	HSD3BP4	hydroxy-delta-5-steroid dehydrogenase, 3 beta, pseudogene 4	-1.27542	0.00202192
ENSG00000129003	VPS13C	vacuolar protein sorting 13 homolog C (S. cerevisiae)	-1.2086	3.44e-34
ENSG00000187624	C17orf97	chromosome 17 open reading frame 97	-1.37178	2.28e-14
ENSG00000116815	CD58	CD58 molecule	-1.19886	1.52e-87
ENSG00000162073	PAQR4	progestin and adipoQ receptor family member IV	-2.28542	5.1e-58
ENSG00000039650	PNKP	polynucleotide kinase 3'-phosphatase	-1.49462	2.07e-216
ENSG00000074964	ARHGEF10L	Rho guanine nucleotide exchange factor (GEF) 10-like	-1.1915	2.04e-34
ENSG00000227702	LINC00111	long intergenic non-protein coding RNA 111	-2.65467	1.91e-09
ENSG00000140740	UQCRC2	ubiquinol-cytochrome c reductase core protein II	-1.07418	7.64e-67
ENSG00000173811	CCDC13-AS1	CCDC13 antisense RNA 1	-1.12258	0.0020142
ENSG00000157881	PANK4	pantothenate kinase 4	-1.01305	5.15e-83
ENSG00000092445	TYRO3	TYRO3 protein tyrosine kinase	-1.0388	2.56e-55
ENSG00000024048	UBR2	ubiquitin protein ligase E3 component n-recognin 2	-1.1035	1.25e-202
ENSG00000165475	CRYL1	crystallin, lambda 1	-1.93922	8.89e-91
ENSG00000197969	VPS13A	vacuolar protein sorting 13 homolog A (S. cerevisiae)	-1.05857	4.28e-58
ENSG00000168517	HEXIM2	hexamethylene bis-acetamide inducible 2	-1.02014	9.58e-21
ENSG00000105429	MEGF8	multiple EGF-like-domains 8	-2.04396	4.35e-139
ENSG00000088827	SIGLEC1	sialic acid binding Ig-like lectin 1, sialoadhesin	-1.73571	0.000394283
ENSG00000082293	COL19A1	collagen, type XIX, alpha 1	-1.211	1.45e-18
ENSG00000111879	FAM184A	family with sequence similarity 184, member A	-1.0906	1.39e-24
ENSG00000100503	NIN	ninein (GSK3B interacting protein)	-2.24275	1.7e-180
ENSG00000170214	ADRA1B	adrenoceptor alpha 1B	-1.45379	0.00783747
ENSG00000105948	TTC26	tetratricopeptide repeat domain 26	-1.49926	8.46e-94
ENSG00000137274	BPHL	biphenyl hydrolase-like (serine hydrolase)	-1.33439	3.78e-69
ENSG00000118690	ARMC2	armadillo repeat containing 2	-1.35038	6.65e-32
ENSG00000133816	MICAL2	microtubule associated monoxygenase, calponin and LIM domain containing 2	-1.44648	1.16e-39
ENSG00000129295	LRRC6	leucine rich repeat containing 6	-1.64944	2.08e-17
ENSG00000152253	SPC25	SPC25, NDC80 kinetochore complex component, homolog (S. cerevisiae)	-1.23759	5.88e-22
ENSG00000110076	NRXN2	neurexin 2	-3.02402	6.19e-13
ENSG00000198331	HYLS1	hydrolethalus syndrome 1	-1.29734	1.23e-28
ENSG00000135604	STX11	syntaxin 11	-1.16908	6.47e-25
ENSG00000166025	AMOTL1	angiomotin like 1	-1.54651	4.37e-300
ENSG00000186230	ZNF749	zinc finger protein 749	-1.1949	5.62e-24
ENSG00000113597	C5orf44	chromosome 5 open reading frame 44	-1.71353	8.54e-198
ENSG00000130638	ATXN10	ataxin 10	-1.87929	0
ENSG00000171823	FBXL14	F-box and leucine-rich repeat protein 14	-1.10907	6.82e-61
ENSG00000184221	OLIG1	oligodendrocyte transcription factor 1	-1.54109	0.000174975
ENSG00000184428	TOP1MT	topoisomerase (DNA) I, mitochondrial	-1.32045	1.54e-79
ENSG00000138386	NAB1	NGFI-A binding protein 1 (EGR1 binding protein 1)	-2.02467	9.98e-136
ENSG00000128266	GNAZ	guanine nucleotide binding protein (G protein), alpha z polypeptide	-3.35092	6.99e-86
ENSG00000131558	EXOC4	exocyst complex component 4	-1.04976	4.91e-88
ENSG00000141447	OSBPL1A	oxysterol binding protein-like 1A	-1.07952	3.32e-27
ENSG00000180185	FAHD1	fumarylacetoacetate hydrolase domain containing 1	-1.6473	2.32e-146
ENSG00000163539	CLASP2	cytoplasmic linker associated protein 2	-1.36911	2.09e-91
ENSG00000105516	DBP	D site of albumin promoter (albumin D-box) binding protein	-2.16435	6.87e-58
ENSG00000162511	LAPTM5	lysosomal protein transmembrane 5	-2.07312	4.83e-07
ENSG00000104765	BNIP3L	BCL2/adenovirus E1B 19kDa interacting protein 3-like	-1.55965	9.12e-240
ENSG00000082213	C5orf22	chromosome 5 open reading frame 22	-1.58362	1.76e-137
ENSG00000160097	FNDC5	fibronectin type III domain containing 5	-1.86075	1.96e-07
ENSG00000147649	MTDH	metadherin	-2.44489	0
ENSG00000058272	PPP1R12A	protein phosphatase 1, regulatory subunit 12A	-1.10446	3.69e-157
ENSG00000128274	A4GALT	alpha 1,4-galactosyltransferase	-1.41986	3.67e-10
ENSG00000173088	C10orf131	chromosome 10 open reading frame 131	-2.15939	4.93e-15
ENSG00000080839	RBL1	retinoblastoma-like 1 (p107)	-1.08043	1.13e-29
ENSG00000068137	PLEKHH3	pleckstrin homology domain containing, family H (with MyTH4 domain) member 3	-1.24427	1.04e-92
ENSG00000141232	TOB1	transducer of ERBB2, 1	-1.56455	0
ENSG00000176225	RTTN	rotatin	-1.78444	2.56e-69
ENSG00000167700	MFSD3	major facilitator superfamily domain containing 3	-1.52639	8.89e-74
ENSG00000156973	PDE6D	phosphodiesterase 6D, cGMP-specific, rod, delta	-1.21099	2.02e-58
ENSG00000113161	HMGCR	3-hydroxy-3-methylglutaryl-CoA reductase	-1.69886	1.24e-233
ENSG00000121964	GTDC1	glycosyltransferase-like domain containing 1	-1.51811	2.54e-106
ENSG00000135776	ABCB10	ATP-binding cassette, sub-family B (MDR/TAP), member 10	-1.37091	8.3e-53
ENSG00000109265	KIAA1211	KIAA1211	-1.26362	1.79e-42
ENSG00000096060	FKBP5	FK506 binding protein 5	-1.4423	1.96e-60
ENSG00000090661	CERS4	ceramide synthase 4	-1.71316	1.22e-80
ENSG00000150086	GRIN2B	glutamate receptor, ionotropic, N-methyl D-aspartate 2B	-2.98904	2.86e-07
ENSG00000175785	PRIMA1	proline rich membrane anchor 1	-1.91916	5.49e-05
ENSG00000004660	CAMKK1	calcium/calmodulin-dependent protein kinase kinase 1, alpha	-1.90691	5.58e-56
ENSG00000198265	HELZ	helicase with zinc finger	-1.10097	5.37e-88
ENSG00000135472	FAIM2	Fas apoptotic inhibitory molecule 2	-2.67241	3.34e-06
ENSG00000137404	NRM	nurim (nuclear envelope membrane protein)	-1.78969	1.61e-66
ENSG00000132394	EEFSEC	eukaryotic elongation factor, selenocysteine-tRNA-specific	-1.45414	1.68e-64
ENSG00000169895	SYAP1	synapse associated protein 1	-1.48928	0
ENSG00000113492	AGXT2	alanine--glyoxylate aminotransferase 2	-2.25583	6.38e-06
ENSG00000133069	TMCC2	transmembrane and coiled-coil domain family 2	-1.68537	9.14e-187
ENSG00000197312	DDI2	DNA-damage inducible 1 homolog 2 (S. cerevisiae)	-1.21357	3.99e-280
ENSG00000185339	TCN2	transcobalamin II	-2.90915	1.82e-175
ENSG00000176909	MAMSTR	MEF2 activating motif and SAP domain containing transcriptional regulator	-1.20011	1.97e-08
ENSG00000167261	DPEP2	dipeptidase 2	-3.13874	5.44e-10
ENSG00000126787	DLGAP5	discs, large (Drosophila) homolog-associated protein 5	-1.58798	7.9e-134
ENSG00000134827	TCN1	transcobalamin I (vitamin B12 binding protein, R binder family)	-2.71617	1.2e-34
ENSG00000235374	SSR4P1	signal sequence receptor, delta pseudogene 1	-1.12045	2.07e-06
ENSG00000117906	RCN2	reticulocalbin 2, EF-hand calcium binding domain	-1.65102	2.02e-214
ENSG00000174595	KLF14	Kruppel-like factor 14	-1.24886	1.26e-05
ENSG00000152952	PLOD2	procollagen-lysine, 2-oxoglutarate 5-dioxygenase 2	-1.38111	3.04e-128
ENSG00000135338	LCA5	Leber congenital amaurosis 5	-1.68464	2.93e-124
ENSG00000137845	ADAM10	ADAM metallopeptidase domain 10	-2.0391	1.41e-201
ENSG00000032742	IFT88	intraflagellar transport 88 homolog (Chlamydomonas)	-1.38061	1.48e-88
ENSG00000153815	CMIP	c-Maf inducing protein	-1.16814	3.26e-109
ENSG00000117586	TNFSF4	tumor necrosis factor (ligand) superfamily, member 4	-1.18189	4.4e-09
ENSG00000170044	ZPLD1	zona pellucida-like domain containing 1	-2.29396	1.32e-13
ENSG00000149380	P4HA3	prolyl 4-hydroxylase, alpha polypeptide III	-2.11081	3.06e-18
ENSG00000117118	SDHB	succinate dehydrogenase complex, subunit B, iron sulfur (Ip)	-1.50408	1.02e-162
ENSG00000118507	AKAP7	A kinase (PRKA) anchor protein 7	-2.07358	7.51e-70
ENSG00000177464	GPR4	G protein-coupled receptor 4	-1.58861	1.64e-08
ENSG00000237330	RNF223	ring finger protein 223	-1.28945	0.0187138
ENSG00000088538	DOCK3	dedicator of cytokinesis 3	-1.18931	2.41e-35
ENSG00000221986	MYBPHL	myosin binding protein H-like	-1.31187	1.71e-05
ENSG00000214193	SH3D21	SH3 domain containing 21	-1.15244	1.6e-33
ENSG00000088756	ARHGAP28	Rho GTPase activating protein 28	-1.24457	6.95e-15
ENSG00000168913	ENHO	energy homeostasis associated	-2.44644	1.21e-49
ENSG00000182950	ODF3L1	outer dense fiber of sperm tails 3-like 1	-1.32143	1.49e-05
ENSG00000062725	APPBP2	amyloid beta precursor protein (cytoplasmic tail) binding protein 2	-1.17271	1.65e-80
ENSG00000124104	SNX21	sorting nexin family member 21	-1.36055	4.85e-116
ENSG00000153294	GPR115	G protein-coupled receptor 115	-1.99758	0.000526768
ENSG00000085511	MAP3K4	mitogen-activated protein kinase kinase kinase 4	-1.38863	1.23e-65
ENSG00000141295	SCRN2	secernin 2	-1.45601	1.76e-88
ENSG00000168874	ATOH8	atonal homolog 8 (Drosophila)	-2.33026	1.63e-88
ENSG00000185737	NRG3	neuregulin 3	-1.86811	8.93e-103
ENSG00000137872	SEMA6D	sema domain, transmembrane domain (TM), and cytoplasmic domain, (semaphorin) 6D	-1.79488	1.21e-85
ENSG00000166959	MS4A8B	membrane-spanning 4-domains, subfamily A, member 8B	-2.38866	0.000145002
ENSG00000165895	ARHGAP42	Rho GTPase activating protein 42	-1.74286	7.67e-139
ENSG00000143633	C1orf131	chromosome 1 open reading frame 131	-1.60165	9.74e-107
ENSG00000006282	SPATA20	spermatogenesis associated 20	-2.27707	0
ENSG00000128965	CHAC1	ChaC, cation transport regulator homolog 1 (E. coli)	-1.68248	1.55e-12
ENSG00000186453	FAM228A	family with sequence similarity 228, member A	-2.31879	1.5e-05
ENSG00000006283	CACNA1G	calcium channel, voltage-dependent, T type, alpha 1G subunit	-1.14839	0.00740559
ENSG00000136141	LRCH1	leucine-rich repeats and calponin homology (CH) domain containing 1	-1.53408	6.32e-203
ENSG00000159398	CES5A	carboxylesterase 5A	-2.18439	0.000240594
ENSG00000143870	PDIA6	protein disulfide isomerase family A, member 6	-2.22408	0
ENSG00000088854	C20orf194	chromosome 20 open reading frame 194	-1.25621	6.3e-148
ENSG00000028137	TNFRSF1B	tumor necrosis factor receptor superfamily, member 1B	-2.0764	1.52e-08
ENSG00000148082	SHC3	SHC (Src homology 2 domain containing) transforming protein 3	-2.12478	8.82e-08
ENSG00000174807	CD248	CD248 molecule, endosialin	-2.42095	0.000104595
ENSG00000182179	UBA7	ubiquitin-like modifier activating enzyme 7	-1.98967	1e-65
ENSG00000114737	CISH	cytokine inducible SH2-containing protein	-2.475	4.01e-61
ENSG00000124678	TCP11	t-complex 11 homolog (mouse)	-1.88904	4.19e-05
ENSG00000115053	NCL	nucleolin	-1.8824	1.15e-244
ENSG00000077097	TOP2B	topoisomerase (DNA) II beta 180kDa	-1.73317	5.92e-239
ENSG00000105675	ATP4A	ATPase, H+/K+ exchanging, alpha polypeptide	-1.68816	8.59e-05
ENSG00000197948	FCHSD1	FCH and double SH3 domains 1	-1.02034	1.78e-64
ENSG00000206503	HLA-A	major histocompatibility complex, class I, A	-2.28386	0
ENSG00000100316	RPL3	ribosomal protein L3	-1.91665	2.02e-157
ENSG00000231793	DOC2GP	double C2-like domains, gamma, pseudogene	-1.81194	1.32e-06
ENSG00000157693	C9orf91	chromosome 9 open reading frame 91	-1.46039	4.9e-57
ENSG00000100299	ARSA	arylsulfatase A	-2.10911	4.84e-125
ENSG00000163703	CRELD1	cysteine-rich with EGF-like domains 1	-1.75119	1.93e-267
ENSG00000169139	UBE2V2	ubiquitin-conjugating enzyme E2 variant 2	-1.4275	1.31e-207
ENSG00000154309	DISP1	dispatched homolog 1 (Drosophila)	-1.02372	8.88e-45
ENSG00000100604	CHGA	chromogranin A (parathyroid secretory protein 1)	-1.66421	6.54e-13
ENSG00000171132	PRKCE	protein kinase C, epsilon	-1.45778	4.81e-105
ENSG00000143226	FCGR2A	Fc fragment of IgG, low affinity IIa, receptor (CD32)	-2.45417	3.86e-35
ENSG00000119401	TRIM32	tripartite motif containing 32	-1.44485	0
ENSG00000157350	ST3GAL2	ST3 beta-galactoside alpha-2,3-sialyltransferase 2	-1.15142	1.11e-90
ENSG00000184005	ST6GALNAC3	ST6 (alpha-N-acetyl-neuraminyl-2,3-beta-galactosyl-1,3)-N-acetylgalactosaminide alpha-2,6-sialyltransferase 3	-4.11957	0
ENSG00000143702	CEP170	centrosomal protein 170kDa	-2.55183	0
ENSG00000122176	FMOD	fibromodulin	-1.97711	0.000454554
ENSG00000085365	SCAMP1	secretory carrier membrane protein 1	-1.68589	2.11e-221
ENSG00000103528	SYT17	synaptotagmin XVII	-1.65501	1.08e-08
ENSG00000044459	CNTLN	centlein, centrosomal protein	-1.75661	6.52e-97
ENSG00000198736	MSRB1	methionine sulfoxide reductase B1	-1.34922	9.54e-47
ENSG00000181513	ACBD4	acyl-CoA binding domain containing 4	-1.1778	9.57e-48
ENSG00000155115	GTF3C6	general transcription factor IIIC, polypeptide 6, alpha 35kDa	-1.23622	5.12e-69
ENSG00000173641	HSPB7	heat shock 27kDa protein family, member 7 (cardiovascular)	-1.99757	7.37e-13
ENSG00000240764	PCDHGC5	protocadherin gamma subfamily C, 5	-1.57305	3.37e-05
ENSG00000088367	EPB41L1	erythrocyte membrane protein band 4.1-like 1	-2.62443	0
ENSG00000159618	GPR114	G protein-coupled receptor 114	-1.17826	0.0189718
ENSG00000134308	YWHAQ	tyrosine 3-monooxygenase/tryptophan 5-monooxygenase activation protein, theta polypeptide	-1.58009	0
ENSG00000227906	SNAP25-AS1	SNAP25 antisense RNA 1	-1.88733	9.61e-06
ENSG00000160349	LCN1	lipocalin 1	-2.52322	6.61e-05
ENSG00000076555	ACACB	acetyl-CoA carboxylase beta	-1.76307	7.81e-301
ENSG00000131626	PPFIA1	protein tyrosine phosphatase, receptor type, f polypeptide (PTPRF), interacting protein (liprin), alpha 1	-1.51794	0
ENSG00000155368	DBI	diazepam binding inhibitor (GABA receptor modulator, acyl-CoA binding protein)	-1.04763	3.11e-114
ENSG00000157510	AFAP1L1	actin filament associated protein 1-like 1	-1.73843	1.94e-265
ENSG00000127418	FGFRL1	fibroblast growth factor receptor-like 1	-1.50819	3.4e-64
ENSG00000137812	CASC5	cancer susceptibility candidate 5	-1.33396	1.04e-49
ENSG00000129450	SIGLEC9	sialic acid binding Ig-like lectin 9	-1.64163	0.0234599
ENSG00000133639	BTG1	B-cell translocation gene 1, anti-proliferative	-1.11982	5.4e-85
ENSG00000170315	UBB	ubiquitin B	-1.11839	3.32e-197
ENSG00000164675	IQUB	IQ motif and ubiquitin domain containing	-1.58845	1.01e-08
ENSG00000143627	PKLR	pyruvate kinase, liver and RBC	-3.12488	9.5e-43
ENSG00000004864	SLC25A13	solute carrier family 25 (aspartate/glutamate carrier), member 13	-1.31447	4.34e-66
ENSG00000114520	SNX4	sorting nexin 4	-1.76741	0
ENSG00000207797	MIR187	microRNA 187	-2.65188	5.75e-05
ENSG00000134824	FADS2	fatty acid desaturase 2	-1.43867	2.14e-54
ENSG00000143515	ATP8B2	ATPase, aminophospholipid transporter, class I, type 8B, member 2	-1.28303	0
ENSG00000154608	CEP170P1	centrosomal protein 170kDa pseudogene 1	-3.07605	2.65e-22
ENSG00000163755	HPS3	Hermansky-Pudlak syndrome 3	-1.32051	6.37e-59
ENSG00000135114	OASL	2'-5'-oligoadenylate synthetase-like	-4.00387	2.73e-24
ENSG00000141560	FN3KRP	fructosamine 3 kinase related protein	-1.12289	3.3e-115
ENSG00000146005	PSD2	pleckstrin and Sec7 domain containing 2	-1.28586	0.00935774
ENSG00000164930	FZD6	frizzled family receptor 6	-1.61624	7.78e-136
ENSG00000168036	CTNNB1	catenin (cadherin-associated protein), beta 1, 88kDa	-2.28136	0
ENSG00000111291	GPRC5D	G protein-coupled receptor, family C, group 5, member D	-1.78974	0.00110999
ENSG00000111181	SLC6A12	solute carrier family 6 (neurotransmitter transporter, betaine/GABA), member 12	-1.51925	1.5e-07
ENSG00000066279	ASPM	asp (abnormal spindle) homolog, microcephaly associated (Drosophila)	-2.44973	2.64e-178
ENSG00000157873	TNFRSF14	tumor necrosis factor receptor superfamily, member 14	-2.36445	0
ENSG00000078070	MCCC1	methylcrotonoyl-CoA carboxylase 1 (alpha)	-1.05719	1.38e-87
ENSG00000165879	FRAT1	frequently rearranged in advanced T-cell lymphomas	-2.16722	6.85e-84
ENSG00000135241	PNPLA8	patatin-like phospholipase domain containing 8	-2.0459	0
ENSG00000137145	DENND4C	DENN/MADD domain containing 4C	-1.17413	3.4e-90
ENSG00000164323	KIAA1430	KIAA1430	-1.35297	6.38e-52
ENSG00000163565	IFI16	interferon, gamma-inducible protein 16	-2.29017	0
ENSG00000137285	TUBB2B	tubulin, beta 2B class IIb	-1.97214	1.73e-31
ENSG00000103888	KIAA1199	KIAA1199	-1.89594	1.38e-124
ENSG00000163254	CRYGC	crystallin, gamma C	-2.73671	6.47e-05
ENSG00000155640	C10orf12	chromosome 10 open reading frame 12	-1.28928	4.85e-31
ENSG00000149548	CCDC15	coiled-coil domain containing 15	-1.50927	3.28e-30
ENSG00000134762	DSC3	desmocollin 3	-1.42274	0.000330485
ENSG00000185420	SMYD3	SET and MYND domain containing 3	-1.30366	9.72e-89
ENSG00000152061	RABGAP1L	RAB GTPase activating protein 1-like	-1.04806	8.07e-57
ENSG00000185168	LINC00482	long intergenic non-protein coding RNA 482	-1.46502	3.24e-05
ENSG00000169564	PCBP1	poly(rC) binding protein 1	-1.01056	3.32e-127
ENSG00000127884	ECHS1	enoyl CoA hydratase, short chain, 1, mitochondrial	-1.05731	1.19e-76
ENSG00000101290	CDS2	CDP-diacylglycerol synthase (phosphatidate cytidylyltransferase) 2	-1.34892	5.87e-261
ENSG00000175946	KLHL38	kelch-like 38 (Drosophila)	-1.42614	3e-47
ENSG00000162923	WDR26	WD repeat domain 26	-1.163	2.82e-100
ENSG00000103489	XYLT1	xylosyltransferase I	-1.5749	3.04e-75
ENSG00000101670	LIPG	lipase, endothelial	-2.12886	0.0024834
ENSG00000196460	RFX8	regulatory factor X, 8	-3.70854	1.89e-08
ENSG00000164331	ANKRA2	ankyrin repeat, family A (RFXANK-like), 2	-1.51778	5.54e-135
ENSG00000105953	OGDH	oxoglutarate (alpha-ketoglutarate) dehydrogenase (lipoamide)	-2.64213	7.86e-261
ENSG00000138439	FAM117B	family with sequence similarity 117, member B	-2.15776	2.22e-60
ENSG00000008311	AASS	aminoadipate-semialdehyde synthase	-1.26691	7.15e-56
ENSG00000242616	GNG10	guanine nucleotide binding protein (G protein), gamma 10	-1.9742	2.71e-43
ENSG00000144036	EXOC6B	exocyst complex component 6B	-1.68421	1.01e-143
ENSG00000122550	KLHL7	kelch-like 7 (Drosophila)	-1.3691	2.55e-197
ENSG00000253309	SERPINE3	serpin peptidase inhibitor, clade E (nexin, plasminogen activator inhibitor type 1), member 3	-1.20569	6.75e-17
ENSG00000164949	GEM	GTP binding protein overexpressed in skeletal muscle	-1.42518	9.93e-28
ENSG00000113269	RNF130	ring finger protein 130	-1.25272	7.06e-157
ENSG00000197245	FAM110D	family with sequence similarity 110, member D	-2.86445	7.29e-05
ENSG00000125910	S1PR4	sphingosine-1-phosphate receptor 4	-1.2545	0.0474653
ENSG00000110536	PTPMT1	protein tyrosine phosphatase, mitochondrial 1	-1.30542	3.65e-50
ENSG00000258429	PDF	peptide deformylase (mitochondrial)	-1.2913	8.54e-58
ENSG00000168259	DNAJC7	DnaJ (Hsp40) homolog, subfamily C, member 7	-1.5312	1.79e-167
ENSG00000160953	MUM1	melanoma associated antigen (mutated) 1	-1.09419	1.01e-278
ENSG00000179097	HTR1F	5-hydroxytryptamine (serotonin) receptor 1F, G protein-coupled	-1.34036	0.00860637
ENSG00000140057	AK7	adenylate kinase 7	-1.99715	3.25e-49
ENSG00000167077	MEI1	meiosis inhibitor 1	-1.2329	7.95e-08
ENSG00000148908	RGS10	regulator of G-protein signaling 10	-1.93702	2.82e-150
ENSG00000198663	C6orf89	chromosome 6 open reading frame 89	-1.23751	4.36e-247
ENSG00000166387	PPFIBP2	PTPRF interacting protein, binding protein 2 (liprin beta 2)	-1.00599	1.51e-39
ENSG00000215440	NPEPL1	aminopeptidase-like 1	-2.38616	5.33e-146
ENSG00000198753	PLXNB3	plexin B3	-3.22931	1.55e-266
ENSG00000137513	NARS2	asparaginyl-tRNA synthetase 2, mitochondrial (putative)	-1.46323	3.59e-54
ENSG00000089177	KIF16B	kinesin family member 16B	-2.27995	0
ENSG00000157985	AGAP1	ArfGAP with GTPase domain, ankyrin repeat and PH domain 1	-1.37171	8.21e-85
ENSG00000133612	AGAP3	ArfGAP with GTPase domain, ankyrin repeat and PH domain 3	-1.55453	3.36e-233
ENSG00000132561	MATN2	matrilin 2	-1.62573	2.61e-82
ENSG00000125810	CD93	CD93 molecule	-1.77655	0.00191454
ENSG00000135406	PRPH	peripherin	-1.54244	0.00378994
ENSG00000110218	PANX1	pannexin 1	-1.92931	3.69e-251
ENSG00000149428	HYOU1	hypoxia up-regulated 1	-1.38263	6.38e-66
ENSG00000266079	SNORA59B		-1.02018	0.0175434
ENSG00000115523	GNLY	granulysin	-2.97357	5.44e-08
ENSG00000103742	IGDCC4	immunoglobulin superfamily, DCC subclass, member 4	-1.03167	1.33e-07
ENSG00000100191	SLC5A4	solute carrier family 5 (low affinity glucose cotransporter), member 4	-2.6295	3.15e-18
ENSG00000152292	SH2D6	SH2 domain containing 6	-1.05924	0.000583051
ENSG00000063854	HAGH	hydroxyacylglutathione hydrolase	-1.96643	7.15e-172
ENSG00000158714	SLAMF8	SLAM family member 8	-1.63258	2.12e-06
ENSG00000150967	ABCB9	ATP-binding cassette, sub-family B (MDR/TAP), member 9	-1.39201	1.76e-34
ENSG00000163399	ATP1A1	ATPase, Na+/K+ transporting, alpha 1 polypeptide	-1.58177	5.19e-168
ENSG00000154258	ABCA9	ATP-binding cassette, sub-family A (ABC1), member 9	-1.61664	7.61e-11
ENSG00000124688	MAD2L1BP	MAD2L1 binding protein	-1.15641	1.61e-74
ENSG00000168484	SFTPC	surfactant protein C	-2.07154	2.24e-05
ENSG00000163975	MFI2	antigen p97 (melanoma associated) identified by monoclonal antibodies 133.2 and 96.5	-1.95961	0
ENSG00000124140	SLC12A5	solute carrier family 12 (potassium/chloride transporter), member 5	-3.21441	7.76e-08
ENSG00000095739	BAMBI	BMP and activin membrane-bound inhibitor homolog (Xenopus laevis)	-1.05154	3.21e-123
ENSG00000160360	GPSM1	G-protein signaling modulator 1	-1.75576	5.12e-247
ENSG00000163219	ARHGAP25	Rho GTPase activating protein 25	-3.47733	1.24e-16
ENSG00000139428	MMAB	methylmalonic aciduria (cobalamin deficiency) cblB type	-1.48812	2.33e-76
ENSG00000177363	LRRN4CL	LRRN4 C-terminal like	-2.41047	5.96e-31
ENSG00000142687	KIAA0319L	KIAA0319-like	-1.1889	1.4e-262
ENSG00000128641	MYO1B	myosin IB	-1.82215	0
ENSG00000169641	LUZP1	leucine zipper protein 1	-1.02566	9.2e-143
ENSG00000092201	SUPT16H	suppressor of Ty 16 homolog (S. cerevisiae)	-1.73933	0
ENSG00000000938	FGR	Gardner-Rasheed feline sarcoma viral (v-fgr) oncogene homolog	-1.48567	0.0116081
ENSG00000161249	DMKN	dermokine	-2.54276	1.53e-20
ENSG00000149609	C20orf144	chromosome 20 open reading frame 144	-1.30005	0.00260945
ENSG00000198690	FAN1	FANCD2/FANCI-associated nuclease 1	-1.3096	1.53e-119
ENSG00000154864	PIEZO2	piezo-type mechanosensitive ion channel component 2	-1.79695	0.000250799
ENSG00000182257	C22orf26	chromosome 22 open reading frame 26	-1.32993	7.09e-05
ENSG00000225180	AATK-AS1	AATK antisense RNA 1	-2.25062	0.000218181
ENSG00000180644	PRF1	perforin 1 (pore forming protein)	-1.83071	0.0117312
ENSG00000107745	MICU1	mitochondrial calcium uptake 1	-1.92239	0
ENSG00000102882	MAPK3	mitogen-activated protein kinase 3	-1.52001	6.08e-184
ENSG00000147138	GPR174	G protein-coupled receptor 174	-1.69929	0.0178245
ENSG00000007350	TKTL1	transketolase-like 1	-1.27223	1.28e-08
ENSG00000225217	HSPA7	heat shock 70kDa protein 7 (HSP70B)	-2.04158	0.000179448
ENSG00000158352	SHROOM4	shroom family member 4	-1.33345	1.72e-87
ENSG00000169105	CHST14	carbohydrate (N-acetylgalactosamine 4-0) sulfotransferase 14	-2.46037	0
ENSG00000084234	APLP2	amyloid beta (A4) precursor-like protein 2	-1.0378	8.78e-148
ENSG00000137776	SLTM	SAFB-like, transcription modulator	-1.04301	1.08e-100
ENSG00000112339	HBS1L	HBS1-like (S. cerevisiae)	-1.80122	0
ENSG00000171951	SCG2	secretogranin II	-1.11125	4.07e-09
ENSG00000157617	C2CD2	C2 calcium-dependent domain containing 2	-2.25376	1.24e-122
ENSG00000171533	MAP6	microtubule-associated protein 6	-1.73485	0.0029877
ENSG00000136861	CDK5RAP2	CDK5 regulatory subunit associated protein 2	-1.63408	4.44e-297
ENSG00000125355	FAM70A	family with sequence similarity 70, member A	-1.43914	1.35e-07
ENSG00000101230	ISM1	isthmin 1 homolog (zebrafish)	-2.45115	2.55e-168
ENSG00000185442	FAM174B	family with sequence similarity 174, member B	-1.73619	6.86e-49
ENSG00000174371	EXO1	exonuclease 1	-1.64404	3.03e-49
ENSG00000105486	LIG1	ligase I, DNA, ATP-dependent	-1.50485	3.27e-75
ENSG00000065457	ADAT1	adenosine deaminase, tRNA-specific 1	-1.18549	2.51e-28
ENSG00000183486	MX2	myxovirus (influenza virus) resistance 2 (mouse)	-1.53698	1.61e-06
ENSG00000198889	DCAF12L1	DDB1 and CUL4 associated factor 12-like 1	-3.77362	8.9e-09
ENSG00000068796	KIF2A	kinesin heavy chain member 2A	-1.71428	7.96e-123
ENSG00000176209	C8orf40	chromosome 8 open reading frame 40	-1.4163	4.1e-106
ENSG00000185813	PCYT2	phosphate cytidylyltransferase 2, ethanolamine	-1.81172	1.96e-284
ENSG00000110013	SIAE	sialic acid acetylesterase	-1.92217	0
ENSG00000065413	ANKRD44	ankyrin repeat domain 44	-1.55012	1.1e-59
ENSG00000079950	STX7	syntaxin 7	-1.52183	6.63e-85
ENSG00000158290	CUL4B	cullin 4B	-1.91236	0
ENSG00000051128	HOMER3	homer homolog 3 (Drosophila)	-1.09599	1.01e-52
ENSG00000009413	REV3L	REV3-like, polymerase (DNA directed), zeta, catalytic subunit	-1.85788	1.1e-215
ENSG00000163956	LRPAP1	low density lipoprotein receptor-related protein associated protein 1	-2.33716	0
ENSG00000245573	BDNF-AS	BDNF antisense RNA	-1.10259	7.25e-10
ENSG00000125703	ATG4C	autophagy related 4C, cysteine peptidase	-1.11272	1.81e-79
ENSG00000186222	BLOC1S4	biogenesis of lysosomal organelles complex-1, subunit 4, cappuccino	-1.77334	1.38e-137
ENSG00000069275	NUCKS1	nuclear casein kinase and cyclin-dependent kinase substrate 1	-2.08203	1.69e-164
ENSG00000115306	SPTBN1	spectrin, beta, non-erythrocytic 1	-2.58351	2.36e-190
ENSG00000123485	HJURP	Holliday junction recognition protein	-1.04149	3.5e-64
ENSG00000100784	RPS6KA5	ribosomal protein S6 kinase, 90kDa, polypeptide 5	-1.98958	1.18e-225
ENSG00000130304	SLC27A1	solute carrier family 27 (fatty acid transporter), member 1	-1.89048	0
ENSG00000241935	HOGA1	4-hydroxy-2-oxoglutarate aldolase 1	-3.21984	6.89e-102
ENSG00000241978	AKAP2	A kinase (PRKA) anchor protein 2	-1.23872	5.64e-07
ENSG00000130024	PHF10	PHD finger protein 10	-1.73107	8.54e-160
ENSG00000165891	E2F7	E2F transcription factor 7	-1.0292	6.46e-45
ENSG00000138182	KIF20B	kinesin family member 20B	-1.91806	5.58e-224
ENSG00000172458	IL17D	interleukin 17D	-1.30705	6.42e-32
ENSG00000108106	UBE2S	ubiquitin-conjugating enzyme E2S	-1.22101	1.27e-137
ENSG00000177301	KCNA2	potassium voltage-gated channel, shaker-related subfamily, member 2	-2.25515	0.00238492
ENSG00000182670	TTC3	tetratricopeptide repeat domain 3	-1.1522	2.41e-187
ENSG00000164638	SLC29A4	solute carrier family 29 (nucleoside transporters), member 4	-1.39591	4.61e-21
ENSG00000154358	OBSCN	obscurin, cytoskeletal calmodulin and titin-interacting RhoGEF	-1.84802	3.71e-141
ENSG00000140950	KIAA1609	KIAA1609	-1.21649	6.4e-51
ENSG00000266189	MIR3186	microRNA 3186	-2.46106	6.42e-08
ENSG00000128340	RAC2	ras-related C3 botulinum toxin substrate 2 (rho family, small GTP binding protein Rac2)	-3.02421	8.63e-35
ENSG00000129515	SNX6	sorting nexin 6	-1.17333	1.64e-164
ENSG00000165996	PTPLA	protein tyrosine phosphatase-like (proline instead of catalytic arginine), member A	-1.80489	1.57e-41
ENSG00000137710	RDX	radixin	-1.64273	2.32e-130
ENSG00000136160	EDNRB	endothelin receptor type B	-1.60078	6.01e-48
ENSG00000170959	DCDC5	doublecortin domain containing 5	-1.86835	0.000605325
ENSG00000166428	PLD4	phospholipase D family, member 4	-1.67022	0.000237372
ENSG00000169783	LINGO1	leucine rich repeat and Ig domain containing 1	-2.19981	1.5e-28
ENSG00000109832	DDX25	DEAD (Asp-Glu-Ala-Asp) box helicase 25	-1.08579	4.17e-07
ENSG00000111727	HCFC2	host cell factor C2	-1.07262	5.28e-62
ENSG00000144152	FBLN7	fibulin 7	-1.53575	2.75e-08
ENSG00000138311	ZNF365	zinc finger protein 365	-1.00578	5.01e-16
ENSG00000141068	KSR1	kinase suppressor of ras 1	-1.55821	1.55e-89
ENSG00000165730	STOX1	storkhead box 1	-2.04419	1.03e-14
ENSG00000114331	ACAP2	ArfGAP with coiled-coil, ankyrin repeat and PH domains 2	-1.0708	1.86e-105
ENSG00000100266	PACSIN2	protein kinase C and casein kinase substrate in neurons 2	-1.89597	0
ENSG00000133321	RARRES3	retinoic acid receptor responder (tazarotene induced) 3	-3.04097	5.56e-17
[truncated: 290 more rows]

## Sheet: BRG1_30kb-bound_Down-Ontology
Category	Term	Count	%	PValue	Genes	List Total	Pop Hits	Pop Total	Fold Enrichment	Bonferroni	Benjamini	FDR
[truncated: 365 more rows]

[truncated: 2 more sheets: BRG1_30kb-bound_Up-List, BRG1_30bound_Up-Ontology]
