# Supplementary material for: Transcription factor MITF and remodeller BRG1 define chromatin organisation at regulatory elements in melanoma cells
Source: eLife. 2015 Mar 24;4:e06857. doi: 10.7554/eLife.06857 (PMC4407272; doi:10.7554/eLife.06857)
Supplement: Supplementary file 4. — Excel spread sheet of genes associated with BRG1 and MITF co-occupied sites or MARES along with their gene ontology. DOI: http://dx.doi.org/10.7554/eLife.06857.022 [file elife06857s004.xlsx]

## Sheet: MITF-BRG1_cobound-List
Ensembl gene id	Gene Name	Gene Description
ENSG00000000938	FGR	feline Gardner-Rasheed sarcoma viral oncogene homolog
ENSG00000001084	GCLC	glutamate-cysteine ligase, catalytic subunit
ENSG00000001461	NIPAL3	NIPA-like domain containing 3
ENSG00000002549	LAP3	leucine aminopeptidase 3
ENSG00000002822	MAD1L1	MAD1 mitotic arrest deficient-like 1 (yeast)
ENSG00000002822	MAD1L1	MAD1 mitotic arrest deficient-like 1 (yeast)
ENSG00000002822	MAD1L1	MAD1 mitotic arrest deficient-like 1 (yeast)
ENSG00000002834	LASP1	LIM and SH3 protein 1
ENSG00000003056	M6PR	mannose-6-phosphate receptor (cation dependent)
ENSG00000003147	ICA1	islet cell autoantigen 1, 69kDa
ENSG00000003989	SLC7A2	solute carrier family 7 (cationic amino acid transporter, y+ system), member 2
ENSG00000004139	SARM1	sterile alpha and TIR motif containing 1
ENSG00000004455	AK2	adenylate kinase 2
ENSG00000004455	AK2	adenylate kinase 2
ENSG00000004455	AK2	adenylate kinase 2
ENSG00000004455	AK2	adenylate kinase 2
ENSG00000004534	RBM6	RNA binding motif protein 6
ENSG00000004660	CAMKK1	calcium/calmodulin-dependent protein kinase kinase 1, alpha
ENSG00000004799	PDK4	pyruvate dehydrogenase kinase, isozyme 4
ENSG00000004809	SLC22A16	solute carrier family 22 (organic cation/carnitine transporter), member 16
ENSG00000004809	SLC22A16	solute carrier family 22 (organic cation/carnitine transporter), member 16
ENSG00000004846	ABCB5	ATP-binding cassette, sub-family B (MDR/TAP), member 5
ENSG00000004848	ARX	aristaless related homeobox
ENSG00000004864	SLC25A13	solute carrier family 25 (aspartate/glutamate carrier), member 13
ENSG00000004864	SLC25A13	solute carrier family 25 (aspartate/glutamate carrier), member 13
ENSG00000004897	CDC27	cell division cycle 27
ENSG00000004975	DVL2	dishevelled segment polarity protein 2
ENSG00000005022	SLC25A5	solute carrier family 25 (mitochondrial carrier; adenine nucleotide translocator), member 5
ENSG00000005249	PRKAR2B	protein kinase, cAMP-dependent, regulatory, type II, beta
ENSG00000005339	CREBBP	CREB binding protein
ENSG00000005471	ABCB4	ATP-binding cassette, sub-family B (MDR/TAP), member 4
ENSG00000005810	MYCBP2	MYC binding protein 2, E3 ubiquitin protein ligase
ENSG00000005889	ZFX	zinc finger protein, X-linked
ENSG00000005889	ZFX	zinc finger protein, X-linked
ENSG00000005981	ASB4	ankyrin repeat and SOCS box containing 4
ENSG00000006114	SYNRG	synergin, gamma
ENSG00000006451	RALA	v-ral simian leukemia viral oncogene homolog A (ras related)
ENSG00000006468	ETV1	ets variant 1
ENSG00000006607	FARP2	FERM, RhoGEF and pleckstrin domain protein 2
ENSG00000006625	GGCT	gamma-glutamylcyclotransferase
ENSG00000006625	GGCT	gamma-glutamylcyclotransferase
ENSG00000006625	GGCT	gamma-glutamylcyclotransferase
ENSG00000006715	VPS41	vacuolar protein sorting 41 homolog (S. cerevisiae)
ENSG00000007047	MARK4	MAP/microtubule affinity-regulating kinase 4
ENSG00000007047	MARK4	MAP/microtubule affinity-regulating kinase 4
ENSG00000007062	PROM1	prominin 1
ENSG00000007944	MYLIP	myosin regulatory light chain interacting protein
ENSG00000007944	MYLIP	myosin regulatory light chain interacting protein
ENSG00000007944	MYLIP	myosin regulatory light chain interacting protein
ENSG00000008083	JARID2	jumonji, AT rich interactive domain 2
ENSG00000008083	JARID2	jumonji, AT rich interactive domain 2
ENSG00000008083	JARID2	jumonji, AT rich interactive domain 2
ENSG00000008083	JARID2	jumonji, AT rich interactive domain 2
ENSG00000008083	JARID2	jumonji, AT rich interactive domain 2
ENSG00000008083	JARID2	jumonji, AT rich interactive domain 2
ENSG00000008196	TFAP2B	transcription factor AP-2 beta (activating enhancer binding protein 2 beta)
ENSG00000008256	CYTH3	cytohesin 3
ENSG00000008294	SPAG9	sperm associated antigen 9
ENSG00000008294	SPAG9	sperm associated antigen 9
ENSG00000008300	CELSR3	cadherin, EGF LAG seven-pass G-type receptor 3
ENSG00000008405	CRY1	cryptochrome circadian clock 1
ENSG00000008441	NFIX	nuclear factor I/X (CCAAT-binding transcription factor)
ENSG00000008441	NFIX	nuclear factor I/X (CCAAT-binding transcription factor)
ENSG00000008441	NFIX	nuclear factor I/X (CCAAT-binding transcription factor)
ENSG00000008513	ST3GAL1	ST3 beta-galactoside alpha-2,3-sialyltransferase 1
ENSG00000008513	ST3GAL1	ST3 beta-galactoside alpha-2,3-sialyltransferase 1
ENSG00000008853	RHOBTB2	Rho-related BTB domain containing 2
ENSG00000009413	REV3L	REV3-like, polymerase (DNA directed), zeta, catalytic subunit
ENSG00000009830	POMT2	protein-O-mannosyltransferase 2
ENSG00000009830	POMT2	protein-O-mannosyltransferase 2
ENSG00000010017	RANBP9	RAN binding protein 9
ENSG00000010072	SPRTN	SprT-like N-terminal domain
ENSG00000010278	CD9	CD9 molecule
ENSG00000010278	CD9	CD9 molecule
ENSG00000010361	FUZ	fuzzy planar cell polarity protein
ENSG00000010404	IDS	iduronate 2-sulfatase
ENSG00000010803	SCMH1	sex comb on midleg homolog 1 (Drosophila)
ENSG00000010810	FYN	FYN oncogene related to SRC, FGR, YES
ENSG00000010810	FYN	FYN oncogene related to SRC, FGR, YES
ENSG00000011009	LYPLA2	lysophospholipase II
ENSG00000011052	NME2	NME/NM23 nucleoside diphosphate kinase 2
ENSG00000011105	TSPAN9	tetraspanin 9
ENSG00000011114	BTBD7	BTB (POZ) domain containing 7
ENSG00000011260	UTP18	UTP18 small subunit (SSU) processome component homolog (yeast)
ENSG00000011332	DPF1	D4, zinc and double PHD fingers family 1
ENSG00000011405	PIK3C2A	phosphatidylinositol-4-phosphate 3-kinase, catalytic subunit type 2 alpha
ENSG00000011426	ANLN	anillin, actin binding protein
ENSG00000011465	DCN	decorin
ENSG00000011523	CEP68	centrosomal protein 68kDa
ENSG00000011523	CEP68	centrosomal protein 68kDa
ENSG00000012124	CD22	CD22 molecule
ENSG00000012232	EXTL3	exostosin-like glycosyltransferase 3
ENSG00000012232	EXTL3	exostosin-like glycosyltransferase 3
ENSG00000012232	EXTL3	exostosin-like glycosyltransferase 3
ENSG00000012232	EXTL3	exostosin-like glycosyltransferase 3
ENSG00000013523	ANGEL1	angel homolog 1 (Drosophila)
ENSG00000013619	MAMLD1	mastermind-like domain containing 1
ENSG00000015285	WAS	Wiskott-Aldrich syndrome
ENSG00000015479	MATR3	matrin 3
ENSG00000018189	RUFY3	RUN and FYVE domain containing 3
ENSG00000019549	SNAI2	snail family zinc finger 2
ENSG00000019549	SNAI2	snail family zinc finger 2
ENSG00000019582	CD74	CD74 molecule, major histocompatibility complex, class II invariant chain
ENSG00000019995	ZRANB1	zinc finger, RAN-binding domain containing 1
ENSG00000020577	SAMD4A	sterile alpha motif domain containing 4A
ENSG00000020577	SAMD4A	sterile alpha motif domain containing 4A
ENSG00000020633	RUNX3	runt-related transcription factor 3
ENSG00000020633	RUNX3	runt-related transcription factor 3
ENSG00000021300	PLEKHB1	pleckstrin homology domain containing, family B (evectins) member 1
ENSG00000023191	RNH1	ribonuclease/angiogenin inhibitor 1
ENSG00000023191	RNH1	ribonuclease/angiogenin inhibitor 1
ENSG00000023287	RB1CC1	RB1-inducible coiled-coil 1
ENSG00000023516	AKAP11	A kinase (PRKA) anchor protein 11
ENSG00000024048	UBR2	ubiquitin protein ligase E3 component n-recognin 2
ENSG00000024526	DEPDC1	DEP domain containing 1
ENSG00000025039	RRAGD	Ras-related GTP binding D
ENSG00000025156	HSF2	heat shock transcription factor 2
ENSG00000025293	PHF20	PHD finger protein 20
ENSG00000025293	PHF20	PHD finger protein 20
ENSG00000025423	HSD17B6	hydroxysteroid (17-beta) dehydrogenase 6
ENSG00000025796	SEC63	SEC63 homolog (S. cerevisiae)
ENSG00000025796	SEC63	SEC63 homolog (S. cerevisiae)
ENSG00000026508	CD44	CD44 molecule (Indian blood group)
ENSG00000026652	AGPAT4	1-acylglycerol-3-phosphate O-acyltransferase 4
ENSG00000027001	MIPEP	mitochondrial intermediate peptidase
ENSG00000027075	PRKCH	protein kinase C, eta
ENSG00000027075	PRKCH	protein kinase C, eta
ENSG00000028116	VRK2	vaccinia related kinase 2
ENSG00000030419	IKZF2	IKAROS family zinc finger 2 (Helios)
ENSG00000030582	GRN	granulin
ENSG00000030582	GRN	granulin
ENSG00000031003	FAM13B	family with sequence similarity 13, member B
ENSG00000031081	ARHGAP31	Rho GTPase activating protein 31
ENSG00000031823	RANBP3	RAN binding protein 3
ENSG00000031823	RANBP3	RAN binding protein 3
ENSG00000031823	RANBP3	RAN binding protein 3
ENSG00000031823	RANBP3	RAN binding protein 3
ENSG00000032389	TSSC1	tumor suppressing subtransferable candidate 1
ENSG00000032742	IFT88	intraflagellar transport 88 homolog (Chlamydomonas)
ENSG00000032742	IFT88	intraflagellar transport 88 homolog (Chlamydomonas)
ENSG00000033122	LRRC7	leucine rich repeat containing 7
ENSG00000033122	LRRC7	leucine rich repeat containing 7
ENSG00000033327	GAB2	GRB2-associated binding protein 2
ENSG00000033327	GAB2	GRB2-associated binding protein 2
ENSG00000033327	GAB2	GRB2-associated binding protein 2
ENSG00000034053	APBA2	amyloid beta (A4) precursor protein-binding, family A, member 2
ENSG00000034239	EFCAB1	EF-hand calcium binding domain 1
ENSG00000035681	NSMAF	neutral sphingomyelinase (N-SMase) activation associated factor
ENSG00000035681	NSMAF	neutral sphingomyelinase (N-SMase) activation associated factor
ENSG00000036257	CUL3	cullin 3
ENSG00000036549	ZZZ3	zinc finger, ZZ-type containing 3
ENSG00000036549	ZZZ3	zinc finger, ZZ-type containing 3
ENSG00000038210	PI4K2B	phosphatidylinositol 4-kinase type 2 beta
ENSG00000038382	TRIO	trio Rho guanine nucleotide exchange factor
ENSG00000038382	TRIO	trio Rho guanine nucleotide exchange factor
ENSG00000038382	TRIO	trio Rho guanine nucleotide exchange factor
ENSG00000038382	TRIO	trio Rho guanine nucleotide exchange factor
ENSG00000038382	TRIO	trio Rho guanine nucleotide exchange factor
ENSG00000038382	TRIO	trio Rho guanine nucleotide exchange factor
ENSG00000038532	CLEC16A	C-type lectin domain family 16, member A
ENSG00000038532	CLEC16A	C-type lectin domain family 16, member A
ENSG00000039068	CDH1	cadherin 1, type 1, E-cadherin (epithelial)
ENSG00000039139	DNAH5	dynein, axonemal, heavy chain 5
ENSG00000039319	ZFYVE16	zinc finger, FYVE domain containing 16
ENSG00000039537	C6	complement component 6
ENSG00000039560	RAI14	retinoic acid induced 14
ENSG00000039650	PNKP	polynucleotide kinase 3'-phosphatase
ENSG00000040608	RTN4R	reticulon 4 receptor
ENSG00000041515	MYO16	myosin XVI
ENSG00000042781	USH2A	Usher syndrome 2A (autosomal recessive, mild)
ENSG00000043143	JADE2	jade family PHD finger 2
ENSG00000043143	JADE2	jade family PHD finger 2
ENSG00000043143	JADE2	jade family PHD finger 2
ENSG00000044459	CNTLN	centlein, centrosomal protein
ENSG00000046653	GPM6B	glycoprotein M6B
ENSG00000047249	ATP6V1H	ATPase, H+ transporting, lysosomal 50/57kDa, V1 subunit H
ENSG00000047346	FAM214A	family with sequence similarity 214, member A
ENSG00000047457	CP	ceruloplasmin (ferroxidase)
ENSG00000047578	KIAA0556	KIAA0556
ENSG00000047579	DTNBP1	dystrobrevin binding protein 1
ENSG00000047579	DTNBP1	dystrobrevin binding protein 1
ENSG00000047579	DTNBP1	dystrobrevin binding protein 1
ENSG00000048028	USP28	ubiquitin specific peptidase 28
ENSG00000048052	HDAC9	histone deacetylase 9
ENSG00000048342	CC2D2A	coiled-coil and C2 domain containing 2A
ENSG00000048471	SNX29	sorting nexin 29
ENSG00000048544	MRPS10	mitochondrial ribosomal protein S10
ENSG00000048740	CELF2	CUGBP, Elav-like family member 2
ENSG00000048740	CELF2	CUGBP, Elav-like family member 2
ENSG00000049323	LTBP1	latent transforming growth factor beta binding protein 1
ENSG00000049323	LTBP1	latent transforming growth factor beta binding protein 1
ENSG00000049618	ARID1B	AT rich interactive domain 1B (SWI1-like)
ENSG00000049759	NEDD4L	neural precursor cell expressed, developmentally down-regulated 4-like, E3 ubiquitin protein ligase
ENSG00000049759	NEDD4L	neural precursor cell expressed, developmentally down-regulated 4-like, E3 ubiquitin protein ligase
ENSG00000049759	NEDD4L	neural precursor cell expressed, developmentally down-regulated 4-like, E3 ubiquitin protein ligase
ENSG00000049759	NEDD4L	neural precursor cell expressed, developmentally down-regulated 4-like, E3 ubiquitin protein ligase
ENSG00000049759	NEDD4L	neural precursor cell expressed, developmentally down-regulated 4-like, E3 ubiquitin protein ligase
ENSG00000049759	NEDD4L	neural precursor cell expressed, developmentally down-regulated 4-like, E3 ubiquitin protein ligase
ENSG00000049860	HEXB	hexosaminidase B (beta polypeptide)
ENSG00000050165	DKK3	dickkopf WNT signaling pathway inhibitor 3
ENSG00000050344	NFE2L3	nuclear factor, erythroid 2-like 3
ENSG00000050344	NFE2L3	nuclear factor, erythroid 2-like 3
ENSG00000050393	MCUR1	mitochondrial calcium uniporter regulator 1
ENSG00000050820	BCAR1	breast cancer anti-estrogen resistance 1
ENSG00000051108	HERPUD1	homocysteine-inducible, endoplasmic reticulum stress-inducible, ubiquitin-like domain member 1
ENSG00000052795	FNIP2	folliculin interacting protein 2
ENSG00000052795	FNIP2	folliculin interacting protein 2
ENSG00000052795	FNIP2	folliculin interacting protein 2
ENSG00000053501	USE1	unconventional SNARE in the ER 1 homolog (S. cerevisiae)
ENSG00000053524	MCF2L2	MCF.2 cell line derived transforming sequence-like 2
ENSG00000053524	MCF2L2	MCF.2 cell line derived transforming sequence-like 2
ENSG00000053524	MCF2L2	MCF.2 cell line derived transforming sequence-like 2
ENSG00000053747	LAMA3	laminin, alpha 3
ENSG00000053900	ANAPC4	anaphase promoting complex subunit 4
ENSG00000054116	TRAPPC3	trafficking protein particle complex 3
ENSG00000054118	THRAP3	thyroid hormone receptor associated protein 3
ENSG00000054392	HHAT	hedgehog acyltransferase
ENSG00000054598	FOXC1	forkhead box C1
ENSG00000054598	FOXC1	forkhead box C1
ENSG00000054611	TBC1D22A	TBC1 domain family, member 22A
ENSG00000054611	TBC1D22A	TBC1 domain family, member 22A
ENSG00000054611	TBC1D22A	TBC1 domain family, member 22A
ENSG00000054690	PLEKHH1	pleckstrin homology domain containing, family H (with MyTH4 domain) member 1
ENSG00000054690	PLEKHH1	pleckstrin homology domain containing, family H (with MyTH4 domain) member 1
ENSG00000054803	CBLN4	cerebellin 4 precursor
ENSG00000054965	FAM168A	family with sequence similarity 168, member A
ENSG00000055044	NOP58	NOP58 ribonucleoprotein
ENSG00000055130	CUL1	cullin 1
ENSG00000055130	CUL1	cullin 1
ENSG00000055208	TAB2	TGF-beta activated kinase 1/MAP3K7 binding protein 2
ENSG00000055483	USP36	ubiquitin specific peptidase 36
ENSG00000055483	USP36	ubiquitin specific peptidase 36
ENSG00000055917	PUM2	pumilio RNA-binding family member 2
ENSG00000055917	PUM2	pumilio RNA-binding family member 2
ENSG00000056558	TRAF1	TNF receptor-associated factor 1
ENSG00000056586	RC3H2	ring finger and CCCH-type domains 2
ENSG00000056661	PCGF2	polycomb group ring finger 2
ENSG00000056972	TRAF3IP2	TRAF3 interacting protein 2
ENSG00000056972	TRAF3IP2	TRAF3 interacting protein 2
ENSG00000056998	GYG2	glycogenin 2
ENSG00000057019	DCBLD2	discoidin, CUB and LCCL domain containing 2
ENSG00000057593	F7	coagulation factor VII (serum prothrombin conversion accelerator)
ENSG00000057608	GDI2	GDP dissociation inhibitor 2
ENSG00000057657	PRDM1	PR domain containing 1, with ZNF domain
ENSG00000057704	TMCC3	transmembrane and coiled-coil domain family 3
ENSG00000058056	USP13	ubiquitin specific peptidase 13 (isopeptidase T-3)
ENSG00000058056	USP13	ubiquitin specific peptidase 13 (isopeptidase T-3)
ENSG00000058056	USP13	ubiquitin specific peptidase 13 (isopeptidase T-3)
ENSG00000058335	RASGRF1	Ras protein-specific guanine nucleotide-releasing factor 1
ENSG00000058335	RASGRF1	Ras protein-specific guanine nucleotide-releasing factor 1
ENSG00000058453	CROCC	ciliary rootlet coiled-coil, rootletin
ENSG00000058673	ZC3H11A	zinc finger CCCH-type containing 11A
ENSG00000059122	FLYWCH1	FLYWCH-type zinc finger 1
ENSG00000059122	FLYWCH1	FLYWCH-type zinc finger 1
ENSG00000059145	UNKL	unkempt family zinc finger-like
ENSG00000059758	CDK17	cyclin-dependent kinase 17
ENSG00000059758	CDK17	cyclin-dependent kinase 17
ENSG00000060069	CTDP1	CTD (carboxy-terminal domain, RNA polymerase II, polypeptide A) phosphatase, subunit 1
ENSG00000060237	WNK1	WNK lysine deficient protein kinase 1
ENSG00000060237	WNK1	WNK lysine deficient protein kinase 1
ENSG00000060339	CCAR1	cell division cycle and apoptosis regulator 1
ENSG00000060718	COL11A1	collagen, type XI, alpha 1
ENSG00000061337	LZTS1	leucine zipper, putative tumor suppressor 1
ENSG00000061938	TNK2	tyrosine kinase, non-receptor, 2
ENSG00000062038	CDH3	cadherin 3, type 1, P-cadherin (placental)
ENSG00000062370	ZNF112	zinc finger protein 112
ENSG00000062485	CS	citrate synthase
ENSG00000062598	ELMO2	engulfment and cell motility 2
ENSG00000062716	VMP1	vacuole membrane protein 1
ENSG00000062822	POLD1	polymerase (DNA directed), delta 1, catalytic subunit
ENSG00000063015	SEZ6	seizure related 6 homolog (mouse)
ENSG00000063046	EIF4B	eukaryotic translation initiation factor 4B
ENSG00000063244	U2AF2	U2 small nuclear RNA auxiliary factor 2
ENSG00000063438	AHRR	aryl-hydrocarbon receptor repressor
ENSG00000063438	AHRR	aryl-hydrocarbon receptor repressor
ENSG00000063761	ADCK1	aarF domain containing kinase 1
ENSG00000063761	ADCK1	aarF domain containing kinase 1
ENSG00000063854	HAGH	hydroxyacylglutathione hydrolase
ENSG00000064205	WISP2	WNT1 inducible signaling pathway protein 2
ENSG00000064205	WISP2	WNT1 inducible signaling pathway protein 2
ENSG00000064225	ST3GAL6	ST3 beta-galactoside alpha-2,3-sialyltransferase 6
ENSG00000064225	ST3GAL6	ST3 beta-galactoside alpha-2,3-sialyltransferase 6
ENSG00000064225	ST3GAL6	ST3 beta-galactoside alpha-2,3-sialyltransferase 6
ENSG00000064309	CDON	cell adhesion associated, oncogene regulated
ENSG00000064419	TNPO3	transportin 3
ENSG00000064763	FAR2	fatty acyl CoA reductase 2
ENSG00000064763	FAR2	fatty acyl CoA reductase 2
ENSG00000064763	FAR2	fatty acyl CoA reductase 2
ENSG00000064932	SBNO2	strawberry notch homolog 2 (Drosophila)
ENSG00000064961	HMG20B	high mobility group 20B
ENSG00000065057	NTHL1	nth endonuclease III-like 1 (E. coli)
ENSG00000065060	UHRF1BP1	UHRF1 binding protein 1
ENSG00000065243	PKN2	protein kinase N2
ENSG00000065243	PKN2	protein kinase N2
ENSG00000065320	NTN1	netrin 1
ENSG00000065485	PDIA5	protein disulfide isomerase family A, member 5
ENSG00000065518	NDUFB4	NADH dehydrogenase (ubiquinone) 1 beta subcomplex, 4, 15kDa
ENSG00000065534	MYLK	myosin light chain kinase
ENSG00000065534	MYLK	myosin light chain kinase
ENSG00000065548	ZC3H15	zinc finger CCCH-type containing 15
ENSG00000065600	TMEM206	transmembrane protein 206
ENSG00000065613	SLK	STE20-like kinase
ENSG00000065621	GSTO2	glutathione S-transferase omega 2
ENSG00000065882	TBC1D1	TBC1 (tre-2/USP6, BUB2, cdc16) domain family, member 1
ENSG00000065978	YBX1	Y box binding protein 1
ENSG00000066084	DIP2B	DIP2 disco-interacting protein 2 homolog B (Drosophila)
ENSG00000066185	ZMYND12	zinc finger, MYND-type containing 12
ENSG00000066230	SLC9A3	solute carrier family 9, subfamily A (NHE3, cation proton antiporter 3), member 3
ENSG00000066405	CLDN18	claudin 18
ENSG00000066827	ZFAT	zinc finger and AT hook domain containing
ENSG00000066855	MTFR1	mitochondrial fission regulator 1
ENSG00000066933	MYO9A	myosin IXA
ENSG00000067057	PFKP	phosphofructokinase, platelet
ENSG00000067082	KLF6	Kruppel-like factor 6
ENSG00000067208	EVI5	ecotropic viral integration site 5
ENSG00000067248	DHX29	DEAH (Asp-Glu-Ala-His) box polypeptide 29
ENSG00000067533	RRP15	ribosomal RNA processing 15 homolog (S. cerevisiae)
ENSG00000067606	PRKCZ	protein kinase C, zeta
ENSG00000067992	PDK3	pyruvate dehydrogenase kinase, isozyme 3
ENSG00000068024	HDAC4	histone deacetylase 4
ENSG00000068305	MEF2A	myocyte enhancer factor 2A
ENSG00000068650	ATP11A	ATPase, class VI, type 11A
ENSG00000068784	SRBD1	S1 RNA binding domain 1
ENSG00000069122	GPR116	G protein-coupled receptor 116
ENSG00000069188	SDK2	sidekick cell adhesion molecule 2
ENSG00000069424	KCNAB2	potassium voltage-gated channel, shaker-related subfamily, beta member 2
ENSG00000069424	KCNAB2	potassium voltage-gated channel, shaker-related subfamily, beta member 2
ENSG00000069424	KCNAB2	potassium voltage-gated channel, shaker-related subfamily, beta member 2
ENSG00000069482	GAL	galanin/GMAP prepropeptide
ENSG00000069482	GAL	galanin/GMAP prepropeptide
ENSG00000069869	NEDD4	neural precursor cell expressed, developmentally down-regulated 4, E3 ubiquitin protein ligase
ENSG00000069956	MAPK6	mitogen-activated protein kinase 6
ENSG00000069956	MAPK6	mitogen-activated protein kinase 6
ENSG00000070214	SLC44A1	solute carrier family 44 (choline transporter), member 1
ENSG00000070444	MNT	MAX network transcriptional repressor
ENSG00000070476	ZXDC	ZXD family zinc finger C
ENSG00000070476	ZXDC	ZXD family zinc finger C
ENSG00000070526	ST6GALNAC1	ST6 (alpha-N-acetyl-neuraminyl-2,3-beta-galactosyl-1,3)-N-acetylgalactosaminide alpha-2,6-sialyltransferase 1
ENSG00000070540	WIPI1	WD repeat domain, phosphoinositide interacting 1
ENSG00000070540	WIPI1	WD repeat domain, phosphoinositide interacting 1
ENSG00000070718	AP3M2	adaptor-related protein complex 3, mu 2 subunit
ENSG00000070731	ST6GALNAC2	ST6 (alpha-N-acetyl-neuraminyl-2,3-beta-galactosyl-1,3)-N-acetylgalactosaminide alpha-2,6-sialyltransferase 2
ENSG00000070731	ST6GALNAC2	ST6 (alpha-N-acetyl-neuraminyl-2,3-beta-galactosyl-1,3)-N-acetylgalactosaminide alpha-2,6-sialyltransferase 2
ENSG00000070882	OSBPL3	oxysterol binding protein-like 3
ENSG00000071051	NCK2	NCK adaptor protein 2
ENSG00000071051	NCK2	NCK adaptor protein 2
ENSG00000071051	NCK2	NCK adaptor protein 2
ENSG00000071051	NCK2	NCK adaptor protein 2
ENSG00000071051	NCK2	NCK adaptor protein 2
ENSG00000071054	MAP4K4	mitogen-activated protein kinase kinase kinase kinase 4
ENSG00000071127	WDR1	WD repeat domain 1
ENSG00000071127	WDR1	WD repeat domain 1
ENSG00000071189	SNX13	sorting nexin 13
ENSG00000071189	SNX13	sorting nexin 13
ENSG00000071189	SNX13	sorting nexin 13
ENSG00000071189	SNX13	sorting nexin 13
ENSG00000071242	RPS6KA2	ribosomal protein S6 kinase, 90kDa, polypeptide 2
ENSG00000071539	TRIP13	thyroid hormone receptor interactor 13
ENSG00000071575	TRIB2	tribbles pseudokinase 2
ENSG00000071626	DAZAP1	DAZ associated protein 1
ENSG00000071889	FAM3A	family with sequence similarity 3, member A
ENSG00000071909	MYO3B	myosin IIIB
ENSG00000072041	SLC6A15	solute carrier family 6 (neutral amino acid transporter), member 15
ENSG00000072110	ACTN1	actinin, alpha 1
ENSG00000072121	ZFYVE26	zinc finger, FYVE domain containing 26
ENSG00000072210	ALDH3A2	aldehyde dehydrogenase 3 family, member A2
ENSG00000072274	TFRC	transferrin receptor
ENSG00000072310	SREBF1	sterol regulatory element binding transcription factor 1
ENSG00000072310	SREBF1	sterol regulatory element binding transcription factor 1
ENSG00000072364	AFF4	AF4/FMR2 family, member 4
ENSG00000072401	UBE2D1	ubiquitin-conjugating enzyme E2D 1
ENSG00000072786	STK10	serine/threonine kinase 10
ENSG00000072803	FBXW11	F-box and WD repeat domain containing 11
ENSG00000073060	SCARB1	scavenger receptor class B, member 1
ENSG00000073060	SCARB1	scavenger receptor class B, member 1
ENSG00000073060	SCARB1	scavenger receptor class B, member 1
ENSG00000073060	SCARB1	scavenger receptor class B, member 1
ENSG00000073060	SCARB1	scavenger receptor class B, member 1
ENSG00000073060	SCARB1	scavenger receptor class B, member 1
ENSG00000073060	SCARB1	scavenger receptor class B, member 1
ENSG00000073060	SCARB1	scavenger receptor class B, member 1
ENSG00000073060	SCARB1	scavenger receptor class B, member 1
ENSG00000073060	SCARB1	scavenger receptor class B, member 1
ENSG00000073111	MCM2	minichromosome maintenance complex component 2
ENSG00000073464	CLCN4	chloride channel, voltage-sensitive 4
ENSG00000073670	ADAM11	ADAM metallopeptidase domain 11
ENSG00000073711	PPP2R3A	protein phosphatase 2, regulatory subunit B'', alpha
ENSG00000073712	FERMT2	fermitin family member 2
ENSG00000073792	IGF2BP2	insulin-like growth factor 2 mRNA binding protein 2
ENSG00000073803	MAP3K13	mitogen-activated protein kinase kinase kinase 13
ENSG00000073849	ST6GAL1	ST6 beta-galactosamide alpha-2,6-sialyltranferase 1
ENSG00000073849	ST6GAL1	ST6 beta-galactosamide alpha-2,6-sialyltranferase 1
ENSG00000073849	ST6GAL1	ST6 beta-galactosamide alpha-2,6-sialyltranferase 1
ENSG00000073921	PICALM	phosphatidylinositol binding clathrin assembly protein
ENSG00000074201	CLNS1A	chloride channel, nucleotide-sensitive, 1A
ENSG00000074319	TSG101	tumor susceptibility 101
ENSG00000074416	MGLL	monoglyceride lipase
ENSG00000074416	MGLL	monoglyceride lipase
ENSG00000074590	NUAK1	NUAK family, SNF1-like kinase, 1
ENSG00000075043	KCNQ2	potassium voltage-gated channel, KQT-like subfamily, member 2
ENSG00000075275	CELSR1	cadherin, EGF LAG seven-pass G-type receptor 1
ENSG00000075275	CELSR1	cadherin, EGF LAG seven-pass G-type receptor 1
ENSG00000075275	CELSR1	cadherin, EGF LAG seven-pass G-type receptor 1
ENSG00000075303	SLC25A40	solute carrier family 25, member 40
ENSG00000075413	MARK3	MAP/microtubule affinity-regulating kinase 3
ENSG00000075420	FNDC3B	fibronectin type III domain containing 3B
ENSG00000075461	CACNG4	calcium channel, voltage-dependent, gamma subunit 4
ENSG00000075568	TMEM131	transmembrane protein 131
ENSG00000075568	TMEM131	transmembrane protein 131
ENSG00000075651	PLD1	phospholipase D1, phosphatidylcholine-specific
ENSG00000075651	PLD1	phospholipase D1, phosphatidylcholine-specific
ENSG00000075651	PLD1	phospholipase D1, phosphatidylcholine-specific
ENSG00000075651	PLD1	phospholipase D1, phosphatidylcholine-specific
ENSG00000075711	DLG1	discs, large homolog 1 (Drosophila)
ENSG00000075785	RAB7A	RAB7A, member RAS oncogene family
ENSG00000076201	PTPN23	protein tyrosine phosphatase, non-receptor type 23
ENSG00000076248	UNG	uracil-DNA glycosylase
ENSG00000076351	SLC46A1	solute carrier family 46 (folate transporter), member 1
ENSG00000076356	PLXNA2	plexin A2
ENSG00000076356	PLXNA2	plexin A2
ENSG00000076641	PAG1	phosphoprotein associated with glycosphingolipid microdomains 1
ENSG00000076864	RAP1GAP	RAP1 GTPase activating protein
ENSG00000076864	RAP1GAP	RAP1 GTPase activating protein
ENSG00000077157	PPP1R12B	protein phosphatase 1, regulatory subunit 12B
ENSG00000077312	SNRPA	small nuclear ribonucleoprotein polypeptide A
ENSG00000077348	EXOSC5	exosome component 5
ENSG00000077458	FAM76B	family with sequence similarity 76, member B
ENSG00000077498	TYR	tyrosinase
ENSG00000077498	TYR	tyrosinase
ENSG00000077585	GPR137B	G protein-coupled receptor 137B
ENSG00000077585	GPR137B	G protein-coupled receptor 137B
ENSG00000077585	GPR137B	G protein-coupled receptor 137B
ENSG00000077585	GPR137B	G protein-coupled receptor 137B
ENSG00000077684	JADE1	jade family PHD finger 1
ENSG00000077684	JADE1	jade family PHD finger 1
ENSG00000077800	FKBP6	FK506 binding protein 6, 36kDa
ENSG00000077809	GTF2I	general transcription factor IIi
ENSG00000078018	MAP2	microtubule-associated protein 2
ENSG00000078018	MAP2	microtubule-associated protein 2
ENSG00000078018	MAP2	microtubule-associated protein 2
ENSG00000078070	MCCC1	methylcrotonoyl-CoA carboxylase 1 (alpha)
ENSG00000078295	ADCY2	adenylate cyclase 2 (brain)
ENSG00000078295	ADCY2	adenylate cyclase 2 (brain)
ENSG00000078295	ADCY2	adenylate cyclase 2 (brain)
ENSG00000078295	ADCY2	adenylate cyclase 2 (brain)
ENSG00000078304	PPP2R5C	protein phosphatase 2, regulatory subunit B', gamma
ENSG00000078304	PPP2R5C	protein phosphatase 2, regulatory subunit B', gamma
ENSG00000078674	PCM1	pericentriolar material 1
ENSG00000078699	CBFA2T2	core-binding factor, runt domain, alpha subunit 2; translocated to, 2
ENSG00000078699	CBFA2T2	core-binding factor, runt domain, alpha subunit 2; translocated to, 2
ENSG00000078804	TP53INP2	tumor protein p53 inducible nuclear protein 2
ENSG00000078804	TP53INP2	tumor protein p53 inducible nuclear protein 2
ENSG00000078902	TOLLIP	toll interacting protein
ENSG00000079112	CDH17	cadherin 17, LI cadherin (liver-intestine)
ENSG00000079215	SLC1A3	solute carrier family 1 (glial high affinity glutamate transporter), member 3
ENSG00000079257	LXN	latexin
ENSG00000079313	REXO1	REX1, RNA exonuclease 1 homolog (S. cerevisiae)
ENSG00000079337	RAPGEF3	Rap guanine nucleotide exchange factor (GEF) 3
ENSG00000079385	CEACAM1	carcinoembryonic antigen-related cell adhesion molecule 1 (biliary glycoprotein)
ENSG00000079689	SCGN	secretagogin, EF-hand calcium binding protein
ENSG00000079739	PGM1	phosphoglucomutase 1
ENSG00000079739	PGM1	phosphoglucomutase 1
ENSG00000079739	PGM1	phosphoglucomutase 1
ENSG00000080166	DCT	dopachrome tautomerase
ENSG00000080166	DCT	dopachrome tautomerase
ENSG00000080189	SLC35C2	solute carrier family 35 (GDP-fucose transporter), member C2
ENSG00000080618	CPB2	carboxypeptidase B2 (plasma)
ENSG00000080709	KCNN2	potassium intermediate/small conductance calcium-activated channel, subfamily N, member 2
ENSG00000080709	KCNN2	potassium intermediate/small conductance calcium-activated channel, subfamily N, member 2
ENSG00000080802	CNOT4	CCR4-NOT transcription complex, subunit 4
ENSG00000080819	CPOX	coproporphyrinogen oxidase
ENSG00000080823	MOK	MOK protein kinase
ENSG00000080839	RBL1	retinoblastoma-like 1 (p107)
ENSG00000080845	DLGAP4	discs, large (Drosophila) homolog-associated protein 4
ENSG00000081087	OSTM1	osteopetrosis associated transmembrane protein 1
ENSG00000081087	OSTM1	osteopetrosis associated transmembrane protein 1
ENSG00000081138	CDH7	cadherin 7, type 2
ENSG00000081148	IMPG2	interphotoreceptor matrix proteoglycan 2
ENSG00000081320	STK17B	serine/threonine kinase 17b
ENSG00000081913	PHLPP1	PH domain and leucine rich repeat protein phosphatase 1
ENSG00000081985	IL12RB2	interleukin 12 receptor, beta 2
ENSG00000082074	FYB	FYN binding protein
ENSG00000082074	FYB	FYN binding protein
ENSG00000082213	C5orf22	chromosome 5 open reading frame 22
ENSG00000082641	NFE2L1	nuclear factor, erythroid 2-like 1
ENSG00000082701	GSK3B	glycogen synthase kinase 3 beta
ENSG00000082898	XPO1	exportin 1 (CRM1 homolog, yeast)
ENSG00000082996	RNF13	ring finger protein 13
ENSG00000083093	PALB2	partner and localizer of BRCA2
ENSG00000083099	LYRM2	LYR motif containing 2
ENSG00000083123	BCKDHB	branched chain keto acid dehydrogenase E1, beta polypeptide
ENSG00000083168	KAT6A	K(lysine) acetyltransferase 6A
ENSG00000083444	PLOD1	procollagen-lysine, 2-oxoglutarate 5-dioxygenase 1
ENSG00000083750	RRAGB	Ras-related GTP binding B
ENSG00000083812	ZNF324	zinc finger protein 324
ENSG00000083857	FAT1	FAT atypical cadherin 1
ENSG00000083857	FAT1	FAT atypical cadherin 1
ENSG00000084112	SSH1	slingshot protein phosphatase 1
ENSG00000084112	SSH1	slingshot protein phosphatase 1
ENSG00000084112	SSH1	slingshot protein phosphatase 1
ENSG00000084628	NKAIN1	Na+/K+ transporting ATPase interacting 1
ENSG00000084636	COL16A1	collagen, type XVI, alpha 1
ENSG00000084674	APOB	apolipoprotein B
ENSG00000084674	APOB	apolipoprotein B
ENSG00000084674	APOB	apolipoprotein B
ENSG00000084731	KIF3C	kinesin family member 3C
ENSG00000084733	RAB10	RAB10, member RAS oncogene family
ENSG00000084774	CAD	carbamoyl-phosphate synthetase 2, aspartate transcarbamylase, and dihydroorotase
ENSG00000085276	MECOM	MDS1 and EVI1 complex locus
ENSG00000085377	PREP	prolyl endopeptidase
ENSG00000085377	PREP	prolyl endopeptidase
ENSG00000085449	WDFY1	WD repeat and FYVE domain containing 1
ENSG00000085449	WDFY1	WD repeat and FYVE domain containing 1
ENSG00000085449	WDFY1	WD repeat and FYVE domain containing 1
ENSG00000085449	WDFY1	WD repeat and FYVE domain containing 1
ENSG00000085831	TTC39A	tetratricopeptide repeat domain 39A
ENSG00000085832	EPS15	epidermal growth factor receptor pathway substrate 15
ENSG00000085871	MGST2	microsomal glutathione S-transferase 2
ENSG00000085998	POMGNT1	protein O-linked mannose N-acetylglucosaminyltransferase 1 (beta 1,2-)
ENSG00000086015	MAST2	microtubule associated serine/threonine kinase 2
ENSG00000086102	NFX1	nuclear transcription factor, X-box binding 1
ENSG00000086300	SNX10	sorting nexin 10
ENSG00000086300	SNX10	sorting nexin 10
ENSG00000086570	FAT2	FAT atypical cadherin 2
ENSG00000086570	FAT2	FAT atypical cadherin 2
ENSG00000086717	PPEF1	protein phosphatase, EF-hand calcium binding domain 1
ENSG00000087053	MTMR2	myotubularin related protein 2
ENSG00000087074	PPP1R15A	protein phosphatase 1, regulatory subunit 15A
ENSG00000087076	HSD17B14	hydroxysteroid (17-beta) dehydrogenase 14
ENSG00000087077	TRIP6	thyroid hormone receptor interactor 6
ENSG00000087088	BAX	BCL2-associated X protein
ENSG00000087095	NLK	nemo-like kinase
ENSG00000087266	SH3BP2	SH3-domain binding protein 2
ENSG00000087269	NOP14	NOP14 nucleolar protein
ENSG00000087274	ADD1	adducin 1 (alpha)
ENSG00000087448	KLHL42	kelch-like family member 42
ENSG00000087495	PHACTR3	phosphatase and actin regulator 3
ENSG00000087842	PIR	pirin (iron-binding nuclear protein)
ENSG00000088035	ALG6	ALG6, alpha-1,3-glucosyltransferase
ENSG00000088205	DDX18	DEAD (Asp-Glu-Ala-Asp) box polypeptide 18
ENSG00000088280	ASAP3	ArfGAP with SH3 domain, ankyrin repeat and PH domain 3
ENSG00000088387	DOCK9	dedicator of cytokinesis 9
ENSG00000088448	ANKRD10	ankyrin repeat domain 10
ENSG00000088756	ARHGAP28	Rho GTPase activating protein 28
ENSG00000088756	ARHGAP28	Rho GTPase activating protein 28
ENSG00000088808	PPP1R13B	protein phosphatase 1, regulatory subunit 13B
ENSG00000088812	ATRN	attractin
ENSG00000088832	FKBP1A	FK506 binding protein 1A, 12kDa
ENSG00000088836	SLC4A11	solute carrier family 4, sodium borate transporter, member 11
ENSG00000088854	C20orf194	chromosome 20 open reading frame 194
ENSG00000089041	P2RX7	purinergic receptor P2X, ligand-gated ion channel, 7
ENSG00000089048	ESF1	ESF1, nucleolar pre-rRNA processing protein, homolog (S. cerevisiae)
ENSG00000089053	ANAPC5	anaphase promoting complex subunit 5
ENSG00000089057	SLC23A2	solute carrier family 23 (ascorbic acid transporter), member 2
ENSG00000089057	SLC23A2	solute carrier family 23 (ascorbic acid transporter), member 2
ENSG00000089057	SLC23A2	solute carrier family 23 (ascorbic acid transporter), member 2
ENSG00000089057	SLC23A2	solute carrier family 23 (ascorbic acid transporter), member 2
ENSG00000089063	TMEM230	transmembrane protein 230
ENSG00000089094	KDM2B	lysine (K)-specific demethylase 2B
ENSG00000089101	C20orf26	chromosome 20 open reading frame 26
ENSG00000089101	C20orf26	chromosome 20 open reading frame 26
ENSG00000089101	C20orf26	chromosome 20 open reading frame 26
ENSG00000089177	KIF16B	kinesin family member 16B
ENSG00000089177	KIF16B	kinesin family member 16B
ENSG00000089248	ERP29	endoplasmic reticulum protein 29
ENSG00000089486	CDIP1	cell death-inducing p53 target 1
ENSG00000089692	LAG3	lymphocyte-activation gene 3
ENSG00000089723	OTUB2	OTU domain, ubiquitin aldehyde binding 2
ENSG00000089820	ARHGAP4	Rho GTPase activating protein 4
ENSG00000089876	DHX32	DEAH (Asp-Glu-Ala-His) box polypeptide 32
ENSG00000089902	RCOR1	REST corepressor 1
ENSG00000090013	BLVRB	biliverdin reductase B (flavin reductase (NADPH))
ENSG00000090020	SLC9A1	solute carrier family 9, subfamily A (NHE1, cation proton antiporter 1), member 1
ENSG00000090060	PAPOLA	poly(A) polymerase alpha
ENSG00000090316	MAEA	macrophage erythroblast attacher
ENSG00000090339	ICAM1	intercellular adhesion molecule 1
ENSG00000090447	TFAP4	transcription factor AP-4 (activating enhancer binding protein 4)
ENSG00000090487	SPG21	spastic paraplegia 21 (autosomal recessive, Mast syndrome)
ENSG00000090487	SPG21	spastic paraplegia 21 (autosomal recessive, Mast syndrome)
ENSG00000090539	CHRD	chordin
ENSG00000090565	RAB11FIP3	RAB11 family interacting protein 3 (class II)
ENSG00000090661	CERS4	ceramide synthase 4
ENSG00000090674	MCOLN1	mucolipin 1
ENSG00000090686	USP48	ubiquitin specific peptidase 48
ENSG00000090924	PLEKHG2	pleckstrin homology domain containing, family G (with RhoGef domain) member 2
ENSG00000090989	EXOC1	exocyst complex component 1
ENSG00000091039	OSBPL8	oxysterol binding protein-like 8
ENSG00000091138	SLC26A3	solute carrier family 26 (anion exchanger), member 3
ENSG00000091651	ORC6	origin recognition complex, subunit 6
ENSG00000091664	SLC17A6	solute carrier family 17 (vesicular glutamate transporter), member 6
ENSG00000091972	CD200	CD200 molecule
ENSG00000092020	PPP2R3C	protein phosphatase 2, regulatory subunit B'', gamma
ENSG00000092068	SLC7A8	solute carrier family 7 (amino acid transporter light chain, L system), member 8
ENSG00000092068	SLC7A8	solute carrier family 7 (amino acid transporter light chain, L system), member 8
ENSG00000092148	HECTD1	HECT domain containing E3 ubiquitin protein ligase 1
ENSG00000092148	HECTD1	HECT domain containing E3 ubiquitin protein ligase 1
ENSG00000092201	SUPT16H	suppressor of Ty 16 homolog (S. cerevisiae)
ENSG00000092421	SEMA6A	sema domain, transmembrane domain (TM), and cytoplasmic domain, (semaphorin) 6A
ENSG00000092439	TRPM7	transient receptor potential cation channel, subfamily M, member 7
ENSG00000092445	TYRO3	TYRO3 protein tyrosine kinase
ENSG00000092529	CAPN3	calpain 3, (p94)
ENSG00000092621	PHGDH	phosphoglycerate dehydrogenase
ENSG00000092931	MFSD11	major facilitator superfamily domain containing 11
ENSG00000092964	DPYSL2	dihydropyrimidinase-like 2
ENSG00000093010	COMT	catechol-O-methyltransferase
ENSG00000093144	ECHDC1	enoyl CoA hydratase domain containing 1
ENSG00000093183	SEC22C	SEC22 vesicle trafficking protein homolog C (S. cerevisiae)
ENSG00000093217	XYLB	xylulokinase homolog (H. influenzae)
ENSG00000095059	DHPS	deoxyhypusine synthase
ENSG00000095066	HOOK2	hook microtubule-tethering protein 2
ENSG00000095066	HOOK2	hook microtubule-tethering protein 2
ENSG00000095209	TMEM38B	transmembrane protein 38B
ENSG00000095209	TMEM38B	transmembrane protein 38B
ENSG00000095319	NUP188	nucleoporin 188kDa
ENSG00000095380	NANS	N-acetylneuraminic acid synthase
ENSG00000095383	TBC1D2	TBC1 domain family, member 2
ENSG00000095637	SORBS1	sorbin and SH3 domain containing 1
ENSG00000095713	CRTAC1	cartilage acidic protein 1
ENSG00000095794	CREM	cAMP responsive element modulator
ENSG00000095794	CREM	cAMP responsive element modulator
ENSG00000095932	C19orf77	chromosome 19 open reading frame 77
ENSG00000096060	FKBP5	FK506 binding protein 5
ENSG00000096080	MRPS18A	mitochondrial ribosomal protein S18A
ENSG00000096080	MRPS18A	mitochondrial ribosomal protein S18A
ENSG00000096717	SIRT1	sirtuin 1
ENSG00000097021	ACOT7	acyl-CoA thioesterase 7
ENSG00000097021	ACOT7	acyl-CoA thioesterase 7
ENSG00000097021	ACOT7	acyl-CoA thioesterase 7
ENSG00000097046	CDC7	cell division cycle 7
ENSG00000097046	CDC7	cell division cycle 7
ENSG00000097046	CDC7	cell division cycle 7
ENSG00000097096	SYDE2	synapse defective 1, Rho GTPase, homolog 2 (C. elegans)
ENSG00000099194	SCD	stearoyl-CoA desaturase (delta-9-desaturase)
ENSG00000099204	ABLIM1	actin binding LIM protein 1
ENSG00000099204	ABLIM1	actin binding LIM protein 1
ENSG00000099204	ABLIM1	actin binding LIM protein 1
ENSG00000099204	ABLIM1	actin binding LIM protein 1
ENSG00000099204	ABLIM1	actin binding LIM protein 1
ENSG00000099260	PALMD	palmdelphin
ENSG00000099331	MYO9B	myosin IXB
ENSG00000099331	MYO9B	myosin IXB
ENSG00000099331	MYO9B	myosin IXB
ENSG00000099331	MYO9B	myosin IXB
ENSG00000099331	MYO9B	myosin IXB
ENSG00000099783	HNRNPM	heterogeneous nuclear ribonucleoprotein M
ENSG00000099797	TECR	trans-2,3-enoyl-CoA reductase
ENSG00000099800	TIMM13	translocase of inner mitochondrial membrane 13 homolog (yeast)
ENSG00000099822	HCN2	hyperpolarization activated cyclic nucleotide-gated potassium channel 2
ENSG00000099860	GADD45B	growth arrest and DNA-damage-inducible, beta
ENSG00000099860	GADD45B	growth arrest and DNA-damage-inducible, beta
ENSG00000099875	MKNK2	MAP kinase interacting serine/threonine kinase 2
ENSG00000099910	KLHL22	kelch-like family member 22
ENSG00000099917	MED15	mediator complex subunit 15
ENSG00000099917	MED15	mediator complex subunit 15
ENSG00000099917	MED15	mediator complex subunit 15
ENSG00000099917	MED15	mediator complex subunit 15
ENSG00000099917	MED15	mediator complex subunit 15
ENSG00000099991	CABIN1	calcineurin binding protein 1
ENSG00000099992	TBC1D10A	TBC1 domain family, member 10A
ENSG00000099992	TBC1D10A	TBC1 domain family, member 10A
ENSG00000099992	TBC1D10A	TBC1 domain family, member 10A
ENSG00000099994	SUSD2	sushi domain containing 2
ENSG00000099994	SUSD2	sushi domain containing 2
ENSG00000099994	SUSD2	sushi domain containing 2
ENSG00000100014	SPECC1L	sperm antigen with calponin homology and coiled-coil domains 1-like
ENSG00000100027	YPEL1	yippee-like 1 (Drosophila)
ENSG00000100027	YPEL1	yippee-like 1 (Drosophila)
ENSG00000100029	PES1	pescadillo ribosomal biogenesis factor 1
ENSG00000100030	MAPK1	mitogen-activated protein kinase 1
ENSG00000100030	MAPK1	mitogen-activated protein kinase 1
ENSG00000100030	MAPK1	mitogen-activated protein kinase 1
ENSG00000100033	PRODH	proline dehydrogenase (oxidase) 1
ENSG00000100033	PRODH	proline dehydrogenase (oxidase) 1
ENSG00000100077	ADRBK2	adrenergic, beta, receptor kinase 2
ENSG00000100077	ADRBK2	adrenergic, beta, receptor kinase 2
ENSG00000100138	NHP2L1	NHP2 non-histone chromosome protein 2-like 1 (S. cerevisiae)
ENSG00000100146	SOX10	SRY (sex determining region Y)-box 10
ENSG00000100150	DEPDC5	DEP domain containing 5
ENSG00000100151	PICK1	protein interacting with PRKCA 1
ENSG00000100151	PICK1	protein interacting with PRKCA 1
ENSG00000100151	PICK1	protein interacting with PRKCA 1
ENSG00000100191	SLC5A4	solute carrier family 5 (glucose activated ion channel), member 4
ENSG00000100221	JOSD1	Josephin domain containing 1
ENSG00000100225	FBXO7	F-box protein 7
ENSG00000100225	FBXO7	F-box protein 7
ENSG00000100225	FBXO7	F-box protein 7
ENSG00000100234	TIMP3	TIMP metallopeptidase inhibitor 3
ENSG00000100234	TIMP3	TIMP metallopeptidase inhibitor 3
ENSG00000100234	TIMP3	TIMP metallopeptidase inhibitor 3
ENSG00000100234	TIMP3	TIMP metallopeptidase inhibitor 3
ENSG00000100239	PPP6R2	protein phosphatase 6, regulatory subunit 2
ENSG00000100239	PPP6R2	protein phosphatase 6, regulatory subunit 2
ENSG00000100266	PACSIN2	protein kinase C and casein kinase substrate in neurons 2
ENSG00000100266	PACSIN2	protein kinase C and casein kinase substrate in neurons 2
ENSG00000100266	PACSIN2	protein kinase C and casein kinase substrate in neurons 2
ENSG00000100284	TOM1	target of myb1 (chicken)
ENSG00000100284	TOM1	target of myb1 (chicken)
ENSG00000100284	TOM1	target of myb1 (chicken)
ENSG00000100290	BIK	BCL2-interacting killer (apoptosis-inducing)
ENSG00000100290	BIK	BCL2-interacting killer (apoptosis-inducing)
ENSG00000100292	HMOX1	heme oxygenase (decycling) 1
ENSG00000100300	TSPO	translocator protein (18kDa)
ENSG00000100302	RASD2	RASD family, member 2
ENSG00000100304	TTLL12	tubulin tyrosine ligase-like family, member 12
ENSG00000100320	RBFOX2	RNA binding protein, fox-1 homolog (C. elegans) 2
ENSG00000100325	ASCC2	activating signal cointegrator 1 complex subunit 2
ENSG00000100345	MYH9	myosin, heavy chain 9, non-muscle
ENSG00000100345	MYH9	myosin, heavy chain 9, non-muscle
ENSG00000100347	SAMM50	SAMM50 sorting and assembly machinery component
ENSG00000100347	SAMM50	SAMM50 sorting and assembly machinery component
ENSG00000100350	FOXRED2	FAD-dependent oxidoreductase domain containing 2
ENSG00000100353	EIF3D	eukaryotic translation initiation factor 3, subunit D
ENSG00000100354	TNRC6B	trinucleotide repeat containing 6B
ENSG00000100364	KIAA0930	KIAA0930
ENSG00000100364	KIAA0930	KIAA0930
ENSG00000100372	SLC25A17	solute carrier family 25 (mitochondrial carrier; peroxisomal membrane protein, 34kDa), member 17
ENSG00000100373	UPK3A	uroplakin 3A
ENSG00000100376	FAM118A	family with sequence similarity 118, member A
ENSG00000100380	ST13	suppression of tumorigenicity 13 (colon carcinoma) (Hsp70 interacting protein)
ENSG00000100403	ZC3H7B	zinc finger CCCH-type containing 7B
ENSG00000100413	POLR3H	polymerase (RNA) III (DNA directed) polypeptide H (22.9kD)
ENSG00000100413	POLR3H	polymerase (RNA) III (DNA directed) polypeptide H (22.9kD)
ENSG00000100416	TRMU	tRNA 5-methylaminomethyl-2-thiouridylate methyltransferase
ENSG00000100439	ABHD4	abhydrolase domain containing 4
ENSG00000100445	SDR39U1	short chain dehydrogenase/reductase family 39U, member 1
ENSG00000100450	GZMH	granzyme H (cathepsin G-like 2, protein h-CCPX)
ENSG00000100453	GZMB	granzyme B (granzyme 2, cytotoxic T-lymphocyte-associated serine esterase 1)
ENSG00000100478	AP4S1	adaptor-related protein complex 4, sigma 1 subunit
ENSG00000100503	NIN	ninein (GSK3B interacting protein)
ENSG00000100503	NIN	ninein (GSK3B interacting protein)
ENSG00000100504	PYGL	phosphorylase, glycogen, liver
ENSG00000100504	PYGL	phosphorylase, glycogen, liver
ENSG00000100504	PYGL	phosphorylase, glycogen, liver
ENSG00000100526	CDKN3	cyclin-dependent kinase inhibitor 3
ENSG00000100558	PLEK2	pleckstrin 2
ENSG00000100564	PIGH	phosphatidylinositol glycan anchor biosynthesis, class H
ENSG00000100565	C14orf166B	chromosome 14 open reading frame 166B
ENSG00000100578	KIAA0586	KIAA0586
ENSG00000100592	DAAM1	dishevelled associated activator of morphogenesis 1
ENSG00000100592	DAAM1	dishevelled associated activator of morphogenesis 1
ENSG00000100592	DAAM1	dishevelled associated activator of morphogenesis 1
ENSG00000100596	SPTLC2	serine palmitoyltransferase, long chain base subunit 2
ENSG00000100614	PPM1A	protein phosphatase, Mg2+/Mn2+ dependent, 1A
ENSG00000100614	PPM1A	protein phosphatase, Mg2+/Mn2+ dependent, 1A
ENSG00000100628	ASB2	ankyrin repeat and SOCS box containing 2
ENSG00000100644	HIF1A	hypoxia inducible factor 1, alpha subunit (basic helix-loop-helix transcription factor)
ENSG00000100644	HIF1A	hypoxia inducible factor 1, alpha subunit (basic helix-loop-helix transcription factor)
ENSG00000100647	KIAA0247	KIAA0247
ENSG00000100650	SRSF5	serine/arginine-rich splicing factor 5
ENSG00000100711	ZFYVE21	zinc finger, FYVE domain containing 21
ENSG00000100802	C14orf93	chromosome 14 open reading frame 93
ENSG00000100813	ACIN1	apoptotic chromatin condensation inducer 1
ENSG00000100815	TRIP11	thyroid hormone receptor interactor 11
ENSG00000100823	APEX1	APEX nuclease (multifunctional DNA repair enzyme) 1
ENSG00000100865	CINP	cyclin-dependent kinase 2 interacting protein
ENSG00000100883	SRP54	signal recognition particle 54kDa
ENSG00000100889	PCK2	phosphoenolpyruvate carboxykinase 2 (mitochondrial)
ENSG00000100897	DCAF11	DDB1 and CUL4 associated factor 11
ENSG00000100906	NFKBIA	nuclear factor of kappa light polypeptide gene enhancer in B-cells inhibitor, alpha
ENSG00000100906	NFKBIA	nuclear factor of kappa light polypeptide gene enhancer in B-cells inhibitor, alpha
ENSG00000100979	PLTP	phospholipid transfer protein
ENSG00000100994	PYGB	phosphorylase, glycogen; brain
ENSG00000101126	ADNP	activity-dependent neuroprotector homeobox
ENSG00000101144	BMP7	bone morphogenetic protein 7
ENSG00000101144	BMP7	bone morphogenetic protein 7
ENSG00000101160	CTSZ	cathepsin Z
ENSG00000101160	CTSZ	cathepsin Z
ENSG00000101161	PRPF6	pre-mRNA processing factor 6
ENSG00000101162	TUBB1	tubulin, beta 1 class VI
ENSG00000101189	MRGBP	MRG/MORF4L binding protein
ENSG00000101190	TCFL5	transcription factor-like 5 (basic helix-loop-helix)
ENSG00000101190	TCFL5	transcription factor-like 5 (basic helix-loop-helix)
ENSG00000101190	TCFL5	transcription factor-like 5 (basic helix-loop-helix)
ENSG00000101190	TCFL5	transcription factor-like 5 (basic helix-loop-helix)
ENSG00000101197	BIRC7	baculoviral IAP repeat containing 7
ENSG00000101220	C20orf27	chromosome 20 open reading frame 27
ENSG00000101236	RNF24	ring finger protein 24
ENSG00000101255	TRIB3	tribbles pseudokinase 3
ENSG00000101265	RASSF2	Ras association (RalGDS/AF-6) domain family member 2
ENSG00000101290	CDS2	CDP-diacylglycerol synthase (phosphatidate cytidylyltransferase) 2
ENSG00000101290	CDS2	CDP-diacylglycerol synthase (phosphatidate cytidylyltransferase) 2
ENSG00000101323	HAO1	hydroxyacid oxidase (glycolate oxidase) 1
ENSG00000101333	PLCB4	phospholipase C, beta 4
ENSG00000101336	HCK	hemopoietic cell kinase
ENSG00000101361	NOP56	NOP56 ribonucleoprotein
ENSG00000101363	MANBAL	mannosidase, beta A, lysosomal-like
ENSG00000101421	CHMP4B	charged multivesicular body protein 4B
ENSG00000101440	ASIP	agouti signaling protein
ENSG00000101442	ACTR5	ARP5 actin-related protein 5 homolog (yeast)
ENSG00000101443	WFDC2	WAP four-disulfide core domain 2
ENSG00000101452	DHX35	DEAH (Asp-Glu-Ala-His) box polypeptide 35
ENSG00000101493	ZNF516	zinc finger protein 516
ENSG00000101493	ZNF516	zinc finger protein 516
ENSG00000101493	ZNF516	zinc finger protein 516
ENSG00000101544	ADNP2	ADNP homeobox 2
ENSG00000101558	VAPA	VAMP (vesicle-associated membrane protein)-associated protein A, 33kDa
ENSG00000101558	VAPA	VAMP (vesicle-associated membrane protein)-associated protein A, 33kDa
ENSG00000101558	VAPA	VAMP (vesicle-associated membrane protein)-associated protein A, 33kDa
ENSG00000101558	VAPA	VAMP (vesicle-associated membrane protein)-associated protein A, 33kDa
ENSG00000101577	LPIN2	lipin 2
ENSG00000101577	LPIN2	lipin 2
ENSG00000101596	SMCHD1	structural maintenance of chromosomes flexible hinge domain containing 1
ENSG00000101608	MYL12A	myosin, light chain 12A, regulatory, non-sarcomeric
ENSG00000101665	SMAD7	SMAD family member 7
ENSG00000101665	SMAD7	SMAD family member 7
ENSG00000101670	LIPG	lipase, endothelial
ENSG00000101680	LAMA1	laminin, alpha 1
ENSG00000101745	ANKRD12	ankyrin repeat domain 12
ENSG00000101850	GPR143	G protein-coupled receptor 143
ENSG00000101871	MID1	midline 1 (Opitz/BBB syndrome)
ENSG00000101871	MID1	midline 1 (Opitz/BBB syndrome)
ENSG00000101945	SUV39H1	suppressor of variegation 3-9 homolog 1 (Drosophila)
ENSG00000101986	ABCD1	ATP-binding cassette, sub-family D (ALD), member 1
ENSG00000101986	ABCD1	ATP-binding cassette, sub-family D (ALD), member 1
ENSG00000102024	PLS3	plastin 3
ENSG00000102081	FMR1	fragile X mental retardation 1
ENSG00000102174	PHEX	phosphate regulating endopeptidase homolog, X-linked
ENSG00000102181	CD99L2	CD99 molecule-like 2
ENSG00000102189	EEA1	early endosome antigen 1
ENSG00000102302	FGD1	FYVE, RhoGEF and PH domain containing 1
ENSG00000102445	KIAA0226L	KIAA0226-like
ENSG00000102531	FNDC3A	fibronectin type III domain containing 3A
ENSG00000102531	FNDC3A	fibronectin type III domain containing 3A
ENSG00000102543	CDADC1	cytidine and dCMP deaminase domain containing 1
ENSG00000102547	CAB39L	calcium binding protein 39-like
ENSG00000102575	ACP5	acid phosphatase 5, tartrate resistant
ENSG00000102606	ARHGEF7	Rho guanine nucleotide exchange factor (GEF) 7
ENSG00000102760	RGCC	regulator of cell cycle
ENSG00000102786	INTS6	integrator complex subunit 6
ENSG00000102796	DHRS12	dehydrogenase/reductase (SDR family) member 12
ENSG00000102882	MAPK3	mitogen-activated protein kinase 3
ENSG00000102900	NUP93	nucleoporin 93kDa
ENSG00000102921	N4BP1	NEDD4 binding protein 1
ENSG00000102924	CBLN1	cerebellin 1 precursor
ENSG00000102970	CCL17	chemokine (C-C motif) ligand 17
ENSG00000102996	MMP15	matrix metallopeptidase 15 (membrane-inserted)
ENSG00000103043	VAC14	Vac14 homolog (S. cerevisiae)
ENSG00000103047	TANGO6	transport and golgi organization 6 homolog (Drosophila)
ENSG00000103067	ESRP2	epithelial splicing regulatory protein 2
ENSG00000103126	AXIN1	axin 1
ENSG00000103126	AXIN1	axin 1
ENSG00000103145	HCFC1R1	host cell factor C1 regulator 1 (XPO1 dependent)
ENSG00000103160	HSDL1	hydroxysteroid dehydrogenase like 1
ENSG00000103160	HSDL1	hydroxysteroid dehydrogenase like 1
ENSG00000103174	NAGPA	N-acetylglucosamine-1-phosphodiester alpha-N-acetylglucosaminidase
ENSG00000103175	WFDC1	WAP four-disulfide core domain 1
ENSG00000103199	ZNF500	zinc finger protein 500
ENSG00000103227	LMF1	lipase maturation factor 1
ENSG00000103249	CLCN7	chloride channel, voltage-sensitive 7
ENSG00000103249	CLCN7	chloride channel, voltage-sensitive 7
ENSG00000103249	CLCN7	chloride channel, voltage-sensitive 7
ENSG00000103257	SLC7A5	solute carrier family 7 (amino acid transporter light chain, L system), member 5
ENSG00000103257	SLC7A5	solute carrier family 7 (amino acid transporter light chain, L system), member 5
ENSG00000103365	GGA2	golgi-associated, gamma adaptin ear containing, ARF binding protein 2
ENSG00000103404	USP31	ubiquitin specific peptidase 31
ENSG00000103472	RRN3P2	RNA polymerase I transcription factor homolog (S. cerevisiae) pseudogene 2
ENSG00000103489	XYLT1	xylosyltransferase I
ENSG00000103489	XYLT1	xylosyltransferase I
ENSG00000103489	XYLT1	xylosyltransferase I
ENSG00000103495	MAZ	MYC-associated zinc finger protein (purine-binding transcription factor)
ENSG00000103496	STX4	syntaxin 4
ENSG00000103507	BCKDK	branched chain ketoacid dehydrogenase kinase
ENSG00000103544	C16orf62	chromosome 16 open reading frame 62
ENSG00000103647	CORO2B	coronin, actin binding protein, 2B
ENSG00000103653	CSK	c-src tyrosine kinase
ENSG00000103657	HERC1	HECT and RLD domain containing E3 ubiquitin protein ligase family member 1
ENSG00000103876	FAH	fumarylacetoacetate hydrolase (fumarylacetoacetase)
ENSG00000103876	FAH	fumarylacetoacetate hydrolase (fumarylacetoacetase)
ENSG00000103876	FAH	fumarylacetoacetate hydrolase (fumarylacetoacetase)
ENSG00000104044	OCA2	oculocutaneous albinism II
ENSG00000104044	OCA2	oculocutaneous albinism II
ENSG00000104067	TJP1	tight junction protein 1
ENSG00000104081	BMF	Bcl2 modifying factor
ENSG00000104081	BMF	Bcl2 modifying factor
ENSG00000104164	BLOC1S6	biogenesis of lysosomal organelles complex-1, subunit 6, pallidin
ENSG00000104213	PDGFRL	platelet-derived growth factor receptor-like
ENSG00000104312	RIPK2	receptor-interacting serine-threonine kinase 2
ENSG00000104313	EYA1	eyes absent homolog 1 (Drosophila)
ENSG00000104313	EYA1	eyes absent homolog 1 (Drosophila)
ENSG00000104313	EYA1	eyes absent homolog 1 (Drosophila)
ENSG00000104320	NBN	nibrin
ENSG00000104324	CPQ	carboxypeptidase Q
ENSG00000104368	PLAT	plasminogen activator, tissue
ENSG00000104412	EMC2	ER membrane protein complex subunit 2
ENSG00000104412	EMC2	ER membrane protein complex subunit 2
ENSG00000104412	EMC2	ER membrane protein complex subunit 2
ENSG00000104447	TRPS1	trichorhinophalangeal syndrome I
ENSG00000104447	TRPS1	trichorhinophalangeal syndrome I
ENSG00000104490	NCALD	neurocalcin delta
ENSG00000104537	ANXA13	annexin A13
ENSG00000104537	ANXA13	annexin A13
ENSG00000104687	GSR	glutathione reductase
ENSG00000104687	GSR	glutathione reductase
ENSG00000104731	KLHDC4	kelch domain containing 4
ENSG00000104731	KLHDC4	kelch domain containing 4
ENSG00000104731	KLHDC4	kelch domain containing 4
ENSG00000104731	KLHDC4	kelch domain containing 4
ENSG00000104731	KLHDC4	kelch domain containing 4
ENSG00000104763	ASAH1	N-acylsphingosine amidohydrolase (acid ceramidase) 1
ENSG00000104765	BNIP3L	BCL2/adenovirus E1B 19kDa interacting protein 3-like
ENSG00000104808	DHDH	dihydrodiol dehydrogenase (dimeric)
ENSG00000104824	HNRNPL	heterogeneous nuclear ribonucleoprotein L
ENSG00000104825	NFKBIB	nuclear factor of kappa light polypeptide gene enhancer in B-cells inhibitor, beta
ENSG00000104833	TUBB4A	tubulin, beta 4A class IVa
ENSG00000104852	SNRNP70	small nuclear ribonucleoprotein 70kDa (U1)
ENSG00000104856	RELB	v-rel avian reticuloendotheliosis viral oncogene homolog B
ENSG00000104866	PPP1R37	protein phosphatase 1, regulatory subunit 37
ENSG00000104866	PPP1R37	protein phosphatase 1, regulatory subunit 37
ENSG00000104866	PPP1R37	protein phosphatase 1, regulatory subunit 37
ENSG00000104880	ARHGEF18	Rho/Rac guanine nucleotide exchange factor (GEF) 18
ENSG00000104897	SF3A2	splicing factor 3a, subunit 2, 66kDa
ENSG00000104946	TBC1D17	TBC1 domain family, member 17
ENSG00000104953	TLE6	transducin-like enhancer of split 6 (E(sp1) homolog, Drosophila)
ENSG00000104957	CCDC130	coiled-coil domain containing 130
ENSG00000104969	SGTA	small glutamine-rich tetratricopeptide repeat (TPR)-containing, alpha
ENSG00000105072	C19orf44	chromosome 19 open reading frame 44
ENSG00000105085	MED26	mediator complex subunit 26
ENSG00000105135	ILVBL	ilvB (bacterial acetolactate synthase)-like
ENSG00000105173	CCNE1	cyclin E1
ENSG00000105176	URI1	URI1, prefoldin-like chaperone
ENSG00000105176	URI1	URI1, prefoldin-like chaperone
ENSG00000105186	ANKRD27	ankyrin repeat domain 27 (VPS9 domain)
ENSG00000105197	TIMM50	translocase of inner mitochondrial membrane 50 homolog (S. cerevisiae)
ENSG00000105219	CNTD2	cyclin N-terminal domain containing 2
ENSG00000105220	GPI	glucose-6-phosphate isomerase
ENSG00000105327	BBC3	BCL2 binding component 3
ENSG00000105402	NAPA	N-ethylmaleimide-sensitive factor attachment protein, alpha
ENSG00000105426	PTPRS	protein tyrosine phosphatase, receptor type, S
ENSG00000105426	PTPRS	protein tyrosine phosphatase, receptor type, S
ENSG00000105464	GRIN2D	glutamate receptor, ionotropic, N-methyl D-aspartate 2D
ENSG00000105486	LIG1	ligase I, DNA, ATP-dependent
ENSG00000105499	PLA2G4C	phospholipase A2, group IVC (cytosolic, calcium-independent)
ENSG00000105499	PLA2G4C	phospholipase A2, group IVC (cytosolic, calcium-independent)
ENSG00000105499	PLA2G4C	phospholipase A2, group IVC (cytosolic, calcium-independent)
ENSG00000105499	PLA2G4C	phospholipase A2, group IVC (cytosolic, calcium-independent)
ENSG00000105499	PLA2G4C	phospholipase A2, group IVC (cytosolic, calcium-independent)
ENSG00000105550	FGF21	fibroblast growth factor 21
ENSG00000105576	TNPO2	transportin 2
ENSG00000105576	TNPO2	transportin 2
ENSG00000105643	ARRDC2	arrestin domain containing 2
ENSG00000105643	ARRDC2	arrestin domain containing 2
ENSG00000105647	PIK3R2	phosphoinositide-3-kinase, regulatory subunit 2 (beta)
ENSG00000105649	RAB3A	RAB3A, member RAS oncogene family
ENSG00000105722	ERF	Ets2 repressor factor
ENSG00000105737	GRIK5	glutamate receptor, ionotropic, kainate 5
ENSG00000105738	SIPA1L3	signal-induced proliferation-associated 1 like 3
ENSG00000105738	SIPA1L3	signal-induced proliferation-associated 1 like 3
ENSG00000105778	AVL9	AVL9 homolog (S. cerevisiase)
ENSG00000105778	AVL9	AVL9 homolog (S. cerevisiase)
ENSG00000105835	NAMPT	nicotinamide phosphoribosyltransferase
ENSG00000105835	NAMPT	nicotinamide phosphoribosyltransferase
ENSG00000105856	HBP1	HMG-box transcription factor 1
ENSG00000105887	MTPN	myotrophin
ENSG00000105889	STEAP1B	STEAP family member 1B
ENSG00000105928	DFNA5	deafness, autosomal dominant 5
ENSG00000105928	DFNA5	deafness, autosomal dominant 5
ENSG00000105929	ATP6V0A4	ATPase, H+ transporting, lysosomal V0 subunit a4
ENSG00000105939	ZC3HAV1	zinc finger CCCH-type, antiviral 1
ENSG00000105939	ZC3HAV1	zinc finger CCCH-type, antiviral 1
ENSG00000105953	OGDH	oxoglutarate (alpha-ketoglutarate) dehydrogenase (lipoamide)
ENSG00000105953	OGDH	oxoglutarate (alpha-ketoglutarate) dehydrogenase (lipoamide)
ENSG00000105976	MET	met proto-oncogene
ENSG00000105976	MET	met proto-oncogene
ENSG00000105976	MET	met proto-oncogene
ENSG00000105976	MET	met proto-oncogene
ENSG00000105976	MET	met proto-oncogene
ENSG00000105976	MET	met proto-oncogene
ENSG00000106004	HOXA5	homeobox A5
ENSG00000106049	HIBADH	3-hydroxyisobutyrate dehydrogenase
ENSG00000106049	HIBADH	3-hydroxyisobutyrate dehydrogenase
ENSG00000106052	TAX1BP1	Tax1 (human T-cell leukemia virus type I) binding protein 1
ENSG00000106052	TAX1BP1	Tax1 (human T-cell leukemia virus type I) binding protein 1
ENSG00000106052	TAX1BP1	Tax1 (human T-cell leukemia virus type I) binding protein 1
ENSG00000106052	TAX1BP1	Tax1 (human T-cell leukemia virus type I) binding protein 1
ENSG00000106052	TAX1BP1	Tax1 (human T-cell leukemia virus type I) binding protein 1
ENSG00000106066	CPVL	carboxypeptidase, vitellogenic-like
ENSG00000106069	CHN2	chimerin 2
ENSG00000106069	CHN2	chimerin 2
ENSG00000106069	CHN2	chimerin 2
ENSG00000106069	CHN2	chimerin 2
ENSG00000106069	CHN2	chimerin 2
ENSG00000106070	GRB10	growth factor receptor-bound protein 10
ENSG00000106070	GRB10	growth factor receptor-bound protein 10
ENSG00000106070	GRB10	growth factor receptor-bound protein 10
ENSG00000106078	COBL	cordon-bleu WH2 repeat protein
ENSG00000106078	COBL	cordon-bleu WH2 repeat protein
ENSG00000106211	HSPB1	heat shock 27kDa protein 1
ENSG00000106263	EIF3B	eukaryotic translation initiation factor 3, subunit B
ENSG00000106263	EIF3B	eukaryotic translation initiation factor 3, subunit B
ENSG00000106266	SNX8	sorting nexin 8
ENSG00000106266	SNX8	sorting nexin 8
ENSG00000106268	NUDT1	nudix (nucleoside diphosphate linked moiety X)-type motif 1
ENSG00000106299	WASL	Wiskott-Aldrich syndrome-like
ENSG00000106366	SERPINE1	serpin peptidase inhibitor, clade E (nexin, plasminogen activator inhibitor type 1), member 1
ENSG00000106392	C1GALT1	core 1 synthase, glycoprotein-N-acetylgalactosamine 3-beta-galactosyltransferase, 1
ENSG00000106436	MYL10	myosin, light chain 10, regulatory
ENSG00000106462	EZH2	enhancer of zeste homolog 2 (Drosophila)
ENSG00000106479	ZNF862	zinc finger protein 862
ENSG00000106608	URGCP	upregulator of cell proliferation
ENSG00000106617	PRKAG2	protein kinase, AMP-activated, gamma 2 non-catalytic subunit
ENSG00000106617	PRKAG2	protein kinase, AMP-activated, gamma 2 non-catalytic subunit
ENSG00000106628	POLD2	polymerase (DNA directed), delta 2, accessory subunit
ENSG00000106636	YKT6	YKT6 v-SNARE homolog (S. cerevisiae)
ENSG00000106682	EIF4H	eukaryotic translation initiation factor 4H
ENSG00000106688	SLC1A1	solute carrier family 1 (neuronal/epithelial high affinity glutamate transporter, system Xag), member 1
ENSG00000106689	LHX2	LIM homeobox 2
ENSG00000106689	LHX2	LIM homeobox 2
ENSG00000106701	FSD1L	fibronectin type III and SPRY domain containing 1-like
ENSG00000106772	PRUNE2	prune homolog 2 (Drosophila)
ENSG00000106780	MEGF9	multiple EGF-like-domains 9
ENSG00000106799	TGFBR1	transforming growth factor, beta receptor 1
ENSG00000106803	SEC61B	Sec61 beta subunit
ENSG00000106868	SUSD1	sushi domain containing 1
ENSG00000106948	AKNA	AT-hook transcription factor
ENSG00000107021	TBC1D13	TBC1 domain family, member 13
ENSG00000107036	KIAA1432	KIAA1432
ENSG00000107077	KDM4C	lysine (K)-specific demethylase 4C
ENSG00000107077	KDM4C	lysine (K)-specific demethylase 4C
ENSG00000107104	KANK1	KN motif and ankyrin repeat domains 1
ENSG00000107104	KANK1	KN motif and ankyrin repeat domains 1
ENSG00000107130	NCS1	neuronal calcium sensor 1
ENSG00000107186	MPDZ	multiple PDZ domain protein
ENSG00000107242	PIP5K1B	phosphatidylinositol-4-phosphate 5-kinase, type I, beta
ENSG00000107262	BAG1	BCL2-associated athanogene
ENSG00000107263	RAPGEF1	Rap guanine nucleotide exchange factor (GEF) 1
ENSG00000107317	PTGDS	prostaglandin D2 synthase 21kDa (brain)
ENSG00000107341	UBE2R2	ubiquitin-conjugating enzyme E2R 2
ENSG00000107372	ZFAND5	zinc finger, AN1-type domain 5
ENSG00000107372	ZFAND5	zinc finger, AN1-type domain 5
ENSG00000107372	ZFAND5	zinc finger, AN1-type domain 5
ENSG00000107518	ATRNL1	attractin-like 1
ENSG00000107521	HPS1	Hermansky-Pudlak syndrome 1
ENSG00000107521	HPS1	Hermansky-Pudlak syndrome 1
ENSG00000107521	HPS1	Hermansky-Pudlak syndrome 1
ENSG00000107521	HPS1	Hermansky-Pudlak syndrome 1
ENSG00000107554	DNMBP	dynamin binding protein
ENSG00000107581	EIF3A	eukaryotic translation initiation factor 3, subunit A
ENSG00000107679	PLEKHA1	pleckstrin homology domain containing, family A (phosphoinositide binding specific) member 1
ENSG00000107742	SPOCK2	sparc/osteonectin, cwcv and kazal-like domains proteoglycan (testican) 2
ENSG00000107745	MICU1	mitochondrial calcium uptake 1
ENSG00000107816	LZTS2	leucine zipper, putative tumor suppressor 2
ENSG00000107829	FBXW4	F-box and WD repeat domain containing 4
ENSG00000107854	TNKS2	tankyrase, TRF1-interacting ankyrin-related ADP-ribose polymerase 2
ENSG00000108001	EBF3	early B-cell factor 3
ENSG00000108018	SORCS1	sortilin-related VPS10 domain containing receptor 1
ENSG00000108039	XPNPEP1	X-prolyl aminopeptidase (aminopeptidase P) 1, soluble
ENSG00000108039	XPNPEP1	X-prolyl aminopeptidase (aminopeptidase P) 1, soluble
ENSG00000108039	XPNPEP1	X-prolyl aminopeptidase (aminopeptidase P) 1, soluble
ENSG00000108055	SMC3	structural maintenance of chromosomes 3
ENSG00000108106	UBE2S	ubiquitin-conjugating enzyme E2S
ENSG00000108179	PPIF	peptidylprolyl isomerase F
ENSG00000108187	PBLD	phenazine biosynthesis-like protein domain containing
ENSG00000108219	TSPAN14	tetraspanin 14
ENSG00000108270	AATF	apoptosis antagonizing transcription factor
ENSG00000108370	RGS9	regulator of G-protein signaling 9
ENSG00000108375	RNF43	ring finger protein 43
ENSG00000108395	TRIM37	tripartite motif containing 37
ENSG00000108557	RAI1	retinoic acid induced 1
ENSG00000108557	RAI1	retinoic acid induced 1
ENSG00000108557	RAI1	retinoic acid induced 1
ENSG00000108557	RAI1	retinoic acid induced 1
ENSG00000108576	SLC6A4	solute carrier family 6 (neurotransmitter transporter), member 4
ENSG00000108599	AKAP10	A kinase (PRKA) anchor protein 10
ENSG00000108654	DDX5	DEAD (Asp-Glu-Ala-Asp) box helicase 5
ENSG00000108784	NAGLU	N-acetylglucosaminidase, alpha
ENSG00000108788	MLX	MLX, MAX dimerization protein
ENSG00000108826	MRPL27	mitochondrial ribosomal protein L27
ENSG00000108828	VAT1	vesicle amine transport 1
ENSG00000108861	DUSP3	dual specificity phosphatase 3
ENSG00000108924	HLF	hepatic leukemia factor
ENSG00000108946	PRKAR1A	protein kinase, cAMP-dependent, regulatory, type I, alpha
ENSG00000108946	PRKAR1A	protein kinase, cAMP-dependent, regulatory, type I, alpha
ENSG00000108946	PRKAR1A	protein kinase, cAMP-dependent, regulatory, type I, alpha
ENSG00000108946	PRKAR1A	protein kinase, cAMP-dependent, regulatory, type I, alpha
ENSG00000108946	PRKAR1A	protein kinase, cAMP-dependent, regulatory, type I, alpha
ENSG00000108946	PRKAR1A	protein kinase, cAMP-dependent, regulatory, type I, alpha
ENSG00000108960	MMD	monocyte to macrophage differentiation-associated
ENSG00000109016	DHRS7B	dehydrogenase/reductase (SDR family) member 7B
ENSG00000109046	WSB1	WD repeat and SOCS box containing 1
ENSG00000109046	WSB1	WD repeat and SOCS box containing 1
ENSG00000109065	NAT9	N-acetyltransferase 9 (GCN5-related, putative)
ENSG00000109084	TMEM97	transmembrane protein 97
ENSG00000109089	CDR2L	cerebellar degeneration-related protein 2-like
ENSG00000109184	DCUN1D4	DCN1, defective in cullin neddylation 1, domain containing 4
ENSG00000109184	DCUN1D4	DCN1, defective in cullin neddylation 1, domain containing 4
ENSG00000109270	LAMTOR3	late endosomal/lysosomal adaptor, MAPK and MTOR activator 3
ENSG00000109320	NFKB1	nuclear factor of kappa light polypeptide gene enhancer in B-cells 1
ENSG00000109320	NFKB1	nuclear factor of kappa light polypeptide gene enhancer in B-cells 1
ENSG00000109323	MANBA	mannosidase, beta A, lysosomal
ENSG00000109332	UBE2D3	ubiquitin-conjugating enzyme E2D 3
ENSG00000109332	UBE2D3	ubiquitin-conjugating enzyme E2D 3
ENSG00000109452	INPP4B	inositol polyphosphate-4-phosphatase, type II, 105kDa
ENSG00000109452	INPP4B	inositol polyphosphate-4-phosphatase, type II, 105kDa
ENSG00000109452	INPP4B	inositol polyphosphate-4-phosphatase, type II, 105kDa
ENSG00000109458	GAB1	GRB2-associated binding protein 1
ENSG00000109536	FRG1	FSHD region gene 1
ENSG00000109536	FRG1	FSHD region gene 1
ENSG00000109586	GALNT7	UDP-N-acetyl-alpha-D-galactosamine:polypeptide N-acetylgalactosaminyltransferase 7 (GalNAc-T7)
ENSG00000109654	TRIM2	tripartite motif containing 2
ENSG00000109654	TRIM2	tripartite motif containing 2
ENSG00000109667	SLC2A9	solute carrier family 2 (facilitated glucose transporter), member 9
ENSG00000109686	SH3D19	SH3 domain containing 19
ENSG00000109689	STIM2	stromal interaction molecule 2
ENSG00000109689	STIM2	stromal interaction molecule 2
ENSG00000109756	RAPGEF2	Rap guanine nucleotide exchange factor (GEF) 2
ENSG00000109758	HGFAC	HGF activator
ENSG00000109771	LRP2BP	LRP2 binding protein
ENSG00000109771	LRP2BP	LRP2 binding protein
ENSG00000109787	KLF3	Kruppel-like factor 3 (basic)
ENSG00000109819	PPARGC1A	peroxisome proliferator-activated receptor gamma, coactivator 1 alpha
ENSG00000109819	PPARGC1A	peroxisome proliferator-activated receptor gamma, coactivator 1 alpha
ENSG00000109819	PPARGC1A	peroxisome proliferator-activated receptor gamma, coactivator 1 alpha
ENSG00000109819	PPARGC1A	peroxisome proliferator-activated receptor gamma, coactivator 1 alpha
ENSG00000109819	PPARGC1A	peroxisome proliferator-activated receptor gamma, coactivator 1 alpha
ENSG00000109819	PPARGC1A	peroxisome proliferator-activated receptor gamma, coactivator 1 alpha
ENSG00000109851	DBX1	developing brain homeobox 1
ENSG00000109861	CTSC	cathepsin C
ENSG00000109919	MTCH2	mitochondrial carrier 2
ENSG00000109919	MTCH2	mitochondrial carrier 2
ENSG00000109920	FNBP4	formin binding protein 4
ENSG00000110031	LPXN	leupaxin
ENSG00000110075	PPP6R3	protein phosphatase 6, regulatory subunit 3
ENSG00000110080	ST3GAL4	ST3 beta-galactoside alpha-2,3-sialyltransferase 4
ENSG00000110080	ST3GAL4	ST3 beta-galactoside alpha-2,3-sialyltransferase 4
ENSG00000110080	ST3GAL4	ST3 beta-galactoside alpha-2,3-sialyltransferase 4
ENSG00000110090	CPT1A	carnitine palmitoyltransferase 1A (liver)
ENSG00000110092	CCND1	cyclin D1
ENSG00000110092	CCND1	cyclin D1
ENSG00000110092	CCND1	cyclin D1
ENSG00000110092	CCND1	cyclin D1
ENSG00000110169	HPX	hemopexin
ENSG00000110171	TRIM3	tripartite motif containing 3
ENSG00000110218	PANX1	pannexin 1
ENSG00000110218	PANX1	pannexin 1
ENSG00000110218	PANX1	pannexin 1
ENSG00000110583	NAA40	N(alpha)-acetyltransferase 40, NatD catalytic subunit
ENSG00000110583	NAA40	N(alpha)-acetyltransferase 40, NatD catalytic subunit
ENSG00000110619	CARS	cysteinyl-tRNA synthetase
ENSG00000110619	CARS	cysteinyl-tRNA synthetase
ENSG00000110628	SLC22A18	solute carrier family 22, member 18
ENSG00000110721	CHKA	choline kinase alpha
ENSG00000110723	EXPH5	exophilin 5
ENSG00000110768	GTF2H1	general transcription factor IIH, polypeptide 1, 62kDa
ENSG00000110799	VWF	von Willebrand factor
ENSG00000110880	CORO1C	coronin, actin binding protein, 1C
ENSG00000110880	CORO1C	coronin, actin binding protein, 1C
ENSG00000110880	CORO1C	coronin, actin binding protein, 1C
ENSG00000110887	DAO	D-amino-acid oxidase
ENSG00000110911	SLC11A2	solute carrier family 11 (proton-coupled divalent metal ion transporter), member 2
ENSG00000111110	PPM1H	protein phosphatase, Mg2+/Mn2+ dependent, 1H
ENSG00000111142	METAP2	methionyl aminopeptidase 2
ENSG00000111142	METAP2	methionyl aminopeptidase 2
ENSG00000111186	WNT5B	wingless-type MMTV integration site family, member 5B
ENSG00000111218	PRMT8	protein arginine methyltransferase 8
ENSG00000111305	GSG1	germ cell associated 1
ENSG00000111344	RASAL1	RAS protein activator like 1 (GAP1 like)
ENSG00000111364	DDX55	DEAD (Asp-Glu-Ala-Asp) box polypeptide 55
ENSG00000111412	C12orf49	chromosome 12 open reading frame 49
ENSG00000111412	C12orf49	chromosome 12 open reading frame 49
ENSG00000111452	GPR133	G protein-coupled receptor 133
ENSG00000111540	RAB5B	RAB5B, member RAS oncogene family
ENSG00000111602	TIMELESS	timeless circadian clock
ENSG00000111652	COPS7A	COP9 signalosome subunit 7A
ENSG00000111666	CHPT1	choline phosphotransferase 1
ENSG00000111670	GNPTAB	N-acetylglucosamine-1-phosphate transferase, alpha and beta subunits
ENSG00000111696	NT5DC3	5'-nucleotidase domain containing 3
ENSG00000111696	NT5DC3	5'-nucleotidase domain containing 3
ENSG00000111696	NT5DC3	5'-nucleotidase domain containing 3
ENSG00000111726	CMAS	cytidine monophosphate N-acetylneuraminic acid synthetase
ENSG00000111737	RAB35	RAB35, member RAS oncogene family
ENSG00000111783	RFX4	regulatory factor X, 4 (influences HLA class II expression)
ENSG00000111783	RFX4	regulatory factor X, 4 (influences HLA class II expression)
ENSG00000111785	RIC8B	RIC8 guanine nucleotide exchange factor B
ENSG00000111846	GCNT2	glucosaminyl (N-acetyl) transferase 2, I-branching enzyme (I blood group)
ENSG00000111859	NEDD9	neural precursor cell expressed, developmentally down-regulated 9
ENSG00000111859	NEDD9	neural precursor cell expressed, developmentally down-regulated 9
ENSG00000111859	NEDD9	neural precursor cell expressed, developmentally down-regulated 9
ENSG00000111859	NEDD9	neural precursor cell expressed, developmentally down-regulated 9
ENSG00000111886	GABRR2	gamma-aminobutyric acid (GABA) A receptor, rho 2
ENSG00000111906	HDDC2	HD domain containing 2
ENSG00000111907	TPD52L1	tumor protein D52-like 1
ENSG00000111912	NCOA7	nuclear receptor coactivator 7
ENSG00000111961	SASH1	SAM and SH3 domain containing 1
ENSG00000111961	SASH1	SAM and SH3 domain containing 1
ENSG00000112078	KCTD20	potassium channel tetramerization domain containing 20
ENSG00000112096	SOD2	superoxide dismutase 2, mitochondrial
ENSG00000112096	LOC100129518	uncharacterized LOC100129518
ENSG00000112118	MCM3	minichromosome maintenance complex component 3
ENSG00000112130	RNF8	ring finger protein 8, E3 ubiquitin protein ligase
ENSG00000112130	RNF8	ring finger protein 8, E3 ubiquitin protein ligase
ENSG00000112159	MDN1	MDN1, midasin homolog (yeast)
ENSG00000112167	SAYSD1	SAYSVFN motif domain containing 1
ENSG00000112182	BACH2	BTB and CNC homology 1, basic leucine zipper transcription factor 2
ENSG00000112186	CAP2	CAP, adenylate cyclase-associated protein, 2 (yeast)
ENSG00000112186	CAP2	CAP, adenylate cyclase-associated protein, 2 (yeast)
ENSG00000112186	CAP2	CAP, adenylate cyclase-associated protein, 2 (yeast)
ENSG00000112245	PTP4A1	protein tyrosine phosphatase type IVA, member 1
ENSG00000112273	HDGFL1	hepatoma derived growth factor-like 1
ENSG00000112273	HDGFL1	hepatoma derived growth factor-like 1
ENSG00000112273	HDGFL1	hepatoma derived growth factor-like 1
ENSG00000112312	GMNN	geminin, DNA replication inhibitor
ENSG00000112319	EYA4	eyes absent homolog 4 (Drosophila)
ENSG00000112335	SNX3	sorting nexin 3
ENSG00000112365	ZBTB24	zinc finger and BTB domain containing 24
ENSG00000112367	FIG4	FIG4 homolog, SAC1 lipid phosphatase domain containing (S. cerevisiae)
ENSG00000112394	SLC16A10	solute carrier family 16 (aromatic amino acid transporter), member 10
ENSG00000112425	EPM2A	epilepsy, progressive myoclonus type 2A, Lafora disease (laforin)
ENSG00000112486	CCR6	chemokine (C-C motif) receptor 6
ENSG00000112514	CUTA	cutA divalent cation tolerance homolog (E. coli)
ENSG00000112531	QKI	QKI, KH domain containing, RNA binding
ENSG00000112531	QKI	QKI, KH domain containing, RNA binding
ENSG00000112539	C6orf118	chromosome 6 open reading frame 118
ENSG00000112539	C6orf118	chromosome 6 open reading frame 118
ENSG00000112539	C6orf118	chromosome 6 open reading frame 118
ENSG00000112541	PDE10A	phosphodiesterase 10A
ENSG00000112561	TFEB	transcription factor EB
ENSG00000112667	DNPH1	2'-deoxynucleoside 5'-phosphate N-hydrolase 1
ENSG00000112679	DUSP22	dual specificity phosphatase 22
ENSG00000112685	EXOC2	exocyst complex component 2
ENSG00000112685	EXOC2	exocyst complex component 2
ENSG00000112699	GMDS	GDP-mannose 4,6-dehydratase
ENSG00000112701	SENP6	SUMO1/sentrin specific peptidase 6
ENSG00000112739	PRPF4B	pre-mRNA processing factor 4B
ENSG00000112739	PRPF4B	pre-mRNA processing factor 4B
ENSG00000112759	SLC29A1	solute carrier family 29 (equilibrative nucleoside transporter), member 1
ENSG00000112773	FAM46A	family with sequence similarity 46, member A
ENSG00000112773	FAM46A	family with sequence similarity 46, member A
ENSG00000112782	CLIC5	chloride intracellular channel 5
ENSG00000112812	PRSS16	protease, serine, 16 (thymus)
ENSG00000112851	ERBB2IP	erbb2 interacting protein
ENSG00000112877	CEP72	centrosomal protein 72kDa
ENSG00000112941	PAPD7	PAP associated domain containing 7
ENSG00000112964	GHR	growth hormone receptor
ENSG00000112972	HMGCS1	3-hydroxy-3-methylglutaryl-CoA synthase 1 (soluble)
ENSG00000112972	HMGCS1	3-hydroxy-3-methylglutaryl-CoA synthase 1 (soluble)
ENSG00000112977	DAP	death-associated protein
ENSG00000113013	HSPA9	heat shock 70kDa protein 9 (mortalin)
ENSG00000113013	HSPA9	heat shock 70kDa protein 9 (mortalin)
ENSG00000113013	HSPA9	heat shock 70kDa protein 9 (mortalin)
ENSG00000113108	APBB3	amyloid beta (A4) precursor protein-binding, family B, member 3
ENSG00000113269	RNF130	ring finger protein 130
ENSG00000113269	RNF130	ring finger protein 130
ENSG00000113273	ARSB	arylsulfatase B
ENSG00000113282	CLINT1	clathrin interactor 1
ENSG00000113360	DROSHA	drosha, ribonuclease type III
ENSG00000113368	LMNB1	lamin B1
ENSG00000113384	GOLPH3	golgi phosphoprotein 3 (coat-protein)
ENSG00000113384	GOLPH3	golgi phosphoprotein 3 (coat-protein)
ENSG00000113387	SUB1	SUB1 homolog (S. cerevisiae)
ENSG00000113448	PDE4D	phosphodiesterase 4D, cAMP-specific
ENSG00000113448	PDE4D	phosphodiesterase 4D, cAMP-specific
ENSG00000113448	PDE4D	phosphodiesterase 4D, cAMP-specific
ENSG00000113492	AGXT2	alanine--glyoxylate aminotransferase 2
ENSG00000113504	SLC12A7	solute carrier family 12 (potassium/chloride transporter), member 7
ENSG00000113552	GNPDA1	glucosamine-6-phosphate deaminase 1
ENSG00000113657	DPYSL3	dihydropyrimidinase-like 3
ENSG00000113742	CPEB4	cytoplasmic polyadenylation element binding protein 4
ENSG00000113916	BCL6	B-cell CLL/lymphoma 6
ENSG00000113916	BCL6	B-cell CLL/lymphoma 6
ENSG00000113966	ARL6	ADP-ribosylation factor-like 6
ENSG00000114023	FAM162A	family with sequence similarity 162, member A
ENSG00000114120	SLC25A36	solute carrier family 25 (pyrimidine nucleotide carrier ), member 36
ENSG00000114127	XRN1	5'-3' exoribonuclease 1
ENSG00000114166	KAT2B	K(lysine) acetyltransferase 2B
ENSG00000114315	HES1	hes family bHLH transcription factor 1
ENSG00000114315	HES1	hes family bHLH transcription factor 1
ENSG00000114315	HES1	hes family bHLH transcription factor 1
ENSG00000114331	ACAP2	ArfGAP with coiled-coil, ankyrin repeat and PH domains 2
ENSG00000114423	CBLB	Cbl proto-oncogene B, E3 ubiquitin protein ligase
ENSG00000114423	CBLB	Cbl proto-oncogene B, E3 ubiquitin protein ligase
ENSG00000114423	CBLB	Cbl proto-oncogene B, E3 ubiquitin protein ligase
ENSG00000114423	CBLB	Cbl proto-oncogene B, E3 ubiquitin protein ligase
ENSG00000114473	IQCG	IQ motif containing G
ENSG00000114480	GBE1	glucan (1,4-alpha-), branching enzyme 1
ENSG00000114503	NCBP2	nuclear cap binding protein subunit 2, 20kDa
ENSG00000114541	FRMD4B	FERM domain containing 4B
ENSG00000114541	FRMD4B	FERM domain containing 4B
ENSG00000114544	SLC41A3	solute carrier family 41, member 3
ENSG00000114554	PLXNA1	plexin A1
ENSG00000114554	PLXNA1	plexin A1
ENSG00000114554	PLXNA1	plexin A1
ENSG00000114554	PLXNA1	plexin A1
ENSG00000114573	ATP6V1A	ATPase, H+ transporting, lysosomal 70kDa, V1 subunit A
ENSG00000114626	ABTB1	ankyrin repeat and BTB (POZ) domain containing 1
ENSG00000114631	PODXL2	podocalyxin-like 2
ENSG00000114654	EFCC1	EF-hand and coiled-coil domain containing 1
ENSG00000114745	GORASP1	golgi reassembly stacking protein 1, 65kDa
ENSG00000114757	PEX5L	peroxisomal biogenesis factor 5-like
ENSG00000114757	PEX5L	peroxisomal biogenesis factor 5-like
ENSG00000114767	RRP9	ribosomal RNA processing 9, small subunit (SSU) processome component, homolog (yeast)
ENSG00000114779	ABHD14B	abhydrolase domain containing 14B
ENSG00000114784	EIF1B	eukaryotic translation initiation factor 1B
ENSG00000114796	KLHL24	kelch-like family member 24
ENSG00000114850	SSR3	signal sequence receptor, gamma (translocon-associated protein gamma)
ENSG00000114850	SSR3	signal sequence receptor, gamma (translocon-associated protein gamma)
ENSG00000114859	CLCN2	chloride channel, voltage-sensitive 2
ENSG00000114861	FOXP1	forkhead box P1
ENSG00000114867	EIF4G1	eukaryotic translation initiation factor 4 gamma, 1
ENSG00000114933	INO80D	INO80 complex subunit D
ENSG00000114933	INO80D	INO80 complex subunit D
ENSG00000114948	ADAM23	ADAM metallopeptidase domain 23
ENSG00000114982	KANSL3	KAT8 regulatory NSL complex subunit 3
ENSG00000115020	PIKFYVE	phosphoinositide kinase, FYVE finger containing
ENSG00000115041	KCNIP3	Kv channel interacting protein 3, calsenilin
ENSG00000115085	ZAP70	zeta-chain (TCR) associated protein kinase 70kDa
ENSG00000115204	MPV17	MpV17 mitochondrial inner membrane protein
ENSG00000115221	LOC100505984	uncharacterized LOC100505984
ENSG00000115221	LOC100505984	uncharacterized LOC100505984
ENSG00000115295	CLIP4	CAP-GLY domain containing linker protein family, member 4
ENSG00000115306	SPTBN1	spectrin, beta, non-erythrocytic 1
ENSG00000115306	SPTBN1	spectrin, beta, non-erythrocytic 1
ENSG00000115306	SPTBN1	spectrin, beta, non-erythrocytic 1
ENSG00000115306	SPTBN1	spectrin, beta, non-erythrocytic 1
ENSG00000115306	SPTBN1	spectrin, beta, non-erythrocytic 1
ENSG00000115310	RTN4	reticulon 4
ENSG00000115310	RTN4	reticulon 4
ENSG00000115310	RTN4	reticulon 4
ENSG00000115368	WDR75	WD repeat domain 75
ENSG00000115419	GLS	glutaminase
ENSG00000115419	GLS	glutaminase
ENSG00000115425	PECR	peroxisomal trans-2-enoyl-CoA reductase
ENSG00000115457	IGFBP2	insulin-like growth factor binding protein 2, 36kDa
ENSG00000115520	COQ10B	coenzyme Q10 homolog B (S. cerevisiae)
ENSG00000115523	GNLY	granulysin
ENSG00000115540	MOB4	MOB family member 4, phocein
ENSG00000115641	FHL2	four and a half LIM domains 2
ENSG00000115648	MLPH	melanophilin
ENSG00000115648	MLPH	melanophilin
ENSG00000115652	UXS1	UDP-glucuronate decarboxylase 1
ENSG00000115657	ABCB6	ATP-binding cassette, sub-family B (MDR/TAP), member 6
ENSG00000115750	TAF1B	TATA box binding protein (TBP)-associated factor, RNA polymerase I, B, 63kDa
ENSG00000115756	HPCAL1	hippocalcin-like 1
ENSG00000115756	HPCAL1	hippocalcin-like 1
ENSG00000115756	HPCAL1	hippocalcin-like 1
ENSG00000115825	PRKD3	protein kinase D3
ENSG00000115827	DCAF17	DDB1 and CUL4 associated factor 17
ENSG00000115828	QPCT	glutaminyl-peptide cyclotransferase
ENSG00000115828	QPCT	glutaminyl-peptide cyclotransferase
ENSG00000115828	QPCT	glutaminyl-peptide cyclotransferase
ENSG00000115839	RAB3GAP1	RAB3 GTPase activating protein subunit 1 (catalytic)
ENSG00000115844	DLX2	distal-less homeobox 2
ENSG00000115844	DLX2	distal-less homeobox 2
ENSG00000115875	SRSF7	serine/arginine-rich splicing factor 7
ENSG00000115884	SDC1	syndecan 1
ENSG00000115902	SLC1A4	solute carrier family 1 (glutamate/neutral amino acid transporter), member 4
ENSG00000115902	SLC1A4	solute carrier family 1 (glutamate/neutral amino acid transporter), member 4
ENSG00000115902	SLC1A4	solute carrier family 1 (glutamate/neutral amino acid transporter), member 4
ENSG00000115947	ORC4	origin recognition complex, subunit 4
ENSG00000115970	THADA	thyroid adenoma associated
ENSG00000116016	EPAS1	endothelial PAS domain protein 1
ENSG00000116016	EPAS1	endothelial PAS domain protein 1
ENSG00000116016	EPAS1	endothelial PAS domain protein 1
ENSG00000116106	EPHA4	EPH receptor A4
ENSG00000116117	PARD3B	par-3 family cell polarity regulator beta
ENSG00000116120	FARSB	phenylalanyl-tRNA synthetase, beta subunit
ENSG00000116138	DNAJC16	DnaJ (Hsp40) homolog, subfamily C, member 16
ENSG00000116161	CACYBP	calcyclin binding protein
ENSG00000116285	ERRFI1	ERBB receptor feedback inhibitor 1
ENSG00000116285	ERRFI1	ERBB receptor feedback inhibitor 1
ENSG00000116406	EDEM3	ER degradation enhancer, mannosidase alpha-like 3
ENSG00000116514	RNF19B	ring finger protein 19B
ENSG00000116604	MEF2D	myocyte enhancer factor 2D
ENSG00000116604	MEF2D	myocyte enhancer factor 2D
ENSG00000116679	IVNS1ABP	influenza virus NS1A binding protein
ENSG00000116685	KIAA2013	KIAA2013
ENSG00000116690	PRG4	proteoglycan 4
ENSG00000116691	MIIP	migration and invasion inhibitory protein
ENSG00000116701	NCF2	neutrophil cytosolic factor 2
ENSG00000116711	PLA2G4A	phospholipase A2, group IVA (cytosolic, calcium-dependent)
ENSG00000116711	PLA2G4A	phospholipase A2, group IVA (cytosolic, calcium-dependent)
ENSG00000116717	GADD45A	growth arrest and DNA-damage-inducible, alpha
ENSG00000116717	GADD45A	growth arrest and DNA-damage-inducible, alpha
ENSG00000116731	PRDM2	PR domain containing 2, with ZNF domain
ENSG00000116731	PRDM2	PR domain containing 2, with ZNF domain
ENSG00000116731	PRDM2	PR domain containing 2, with ZNF domain
ENSG00000116731	PRDM2	PR domain containing 2, with ZNF domain
ENSG00000116754	SRSF11	serine/arginine-rich splicing factor 11
ENSG00000116852	KIF21B	kinesin family member 21B
ENSG00000116874	WARS2	tryptophanyl tRNA synthetase 2, mitochondrial
ENSG00000116882	HAO2	hydroxyacid oxidase 2 (long chain)
ENSG00000116882	HAO2	hydroxyacid oxidase 2 (long chain)
ENSG00000116882	HAO2	hydroxyacid oxidase 2 (long chain)
ENSG00000116882	HAO2	hydroxyacid oxidase 2 (long chain)
ENSG00000116898	MRPS15	mitochondrial ribosomal protein S15
ENSG00000116922	C1orf109	chromosome 1 open reading frame 109
ENSG00000116954	RRAGC	Ras-related GTP binding C
ENSG00000116962	NID1	nidogen 1
ENSG00000117000	RLF	rearranged L-myc fusion
ENSG00000117036	ETV3	ets variant 3
ENSG00000117114	LPHN2	latrophilin 2
ENSG00000117115	PADI2	peptidyl arginine deiminase, type II
ENSG00000117122	MFAP2	microfibrillar-associated protein 2
ENSG00000117153	KLHL12	kelch-like family member 12
ENSG00000117280	RAB7L1	RAB7, member RAS oncogene family-like 1
ENSG00000117289	TXNIP	thioredoxin interacting protein
ENSG00000117298	ECE1	endothelin converting enzyme 1
ENSG00000117305	HMGCL	3-hydroxymethyl-3-methylglutaryl-CoA lyase
ENSG00000117360	PRPF3	pre-mRNA processing factor 3
ENSG00000117362	APH1A	APH1A gamma secretase subunit
ENSG00000117394	SLC2A1	solute carrier family 2 (facilitated glucose transporter), member 1
ENSG00000117408	IPO13	importin 13
ENSG00000117410	ATP6V0B	ATPase, H+ transporting, lysosomal 21kDa, V0 subunit b
ENSG00000117448	AKR1A1	aldo-keto reductase family 1, member A1 (aldehyde reductase)
ENSG00000117461	PIK3R3	phosphoinositide-3-kinase, regulatory subunit 3 (gamma)
ENSG00000117472	TSPAN1	tetraspanin 1
ENSG00000117479	SLC19A2	solute carrier family 19 (thiamine transporter), member 2
ENSG00000117523	PRRC2C	proline-rich coiled-coil 2C
ENSG00000117523	PRRC2C	proline-rich coiled-coil 2C
ENSG00000117560	FASLG	Fas ligand (TNF superfamily, member 6)
ENSG00000117569	PTBP2	polypyrimidine tract binding protein 2
ENSG00000117586	TNFSF4	tumor necrosis factor (ligand) superfamily, member 4
ENSG00000117597	DIEXF	digestive organ expansion factor homolog (zebrafish)
ENSG00000117597	DIEXF	digestive organ expansion factor homolog (zebrafish)
ENSG00000117650	NEK2	NIMA-related kinase 2
ENSG00000117682	DHDDS	dehydrodolichyl diphosphate synthase
ENSG00000117713	ARID1A	AT rich interactive domain 1A (SWI-like)
ENSG00000117859	OSBPL9	oxysterol binding protein-like 9
ENSG00000117859	OSBPL9	oxysterol binding protein-like 9
ENSG00000117906	RCN2	reticulocalbin 2, EF-hand calcium binding domain
ENSG00000117984	CTSD	cathepsin D
ENSG00000118007	STAG1	stromal antigen 1
ENSG00000118007	STAG1	stromal antigen 1
ENSG00000118007	STAG1	stromal antigen 1
ENSG00000118194	TNNT2	troponin T type 2 (cardiac)
ENSG00000118217	ATF6	activating transcription factor 6
ENSG00000118257	NRP2	neuropilin 2
ENSG00000118257	NRP2	neuropilin 2
ENSG00000118276	B4GALT6	UDP-Gal:betaGlcNAc beta 1,4- galactosyltransferase, polypeptide 6
ENSG00000118298	CA14	carbonic anhydrase XIV
ENSG00000118298	CA14	carbonic anhydrase XIV
ENSG00000118369	USP35	ubiquitin specific peptidase 35
ENSG00000118473	SGIP1	SH3-domain GRB2-like (endophilin) interacting protein 1
ENSG00000118482	PHF3	PHD finger protein 3
ENSG00000118503	TNFAIP3	tumor necrosis factor, alpha-induced protein 3
ENSG00000118503	TNFAIP3	tumor necrosis factor, alpha-induced protein 3
ENSG00000118503	TNFAIP3	tumor necrosis factor, alpha-induced protein 3
ENSG00000118503	TNFAIP3	tumor necrosis factor, alpha-induced protein 3
ENSG00000118508	RAB32	RAB32, member RAS oncogene family
ENSG00000118508	RAB32	RAB32, member RAS oncogene family
ENSG00000118513	MYB	v-myb avian myeloblastosis viral oncogene homolog
ENSG00000118514	ALDH8A1	aldehyde dehydrogenase 8 family, member A1
ENSG00000118515	SGK1	serum/glucocorticoid regulated kinase 1
ENSG00000118515	SGK1	serum/glucocorticoid regulated kinase 1
ENSG00000118518	RNF146	ring finger protein 146
ENSG00000118557	PMFBP1	polyamine modulated factor 1 binding protein 1
ENSG00000118564	FBXL5	F-box and leucine-rich repeat protein 5
ENSG00000118596	SLC16A7	solute carrier family 16 (monocarboxylate transporter), member 7
ENSG00000118596	SLC16A7	solute carrier family 16 (monocarboxylate transporter), member 7
ENSG00000118689	FOXO3	forkhead box O3
ENSG00000118785	SPP1	secreted phosphoprotein 1
ENSG00000118785	SPP1	secreted phosphoprotein 1
ENSG00000118849	RARRES1	retinoic acid receptor responder (tazarotene induced) 1
ENSG00000118873	RAB3GAP2	RAB3 GTPase activating protein subunit 2 (non-catalytic)
ENSG00000118922	KLF12	Kruppel-like factor 12
ENSG00000118965	WDR35	WD repeat domain 35
ENSG00000118997	DNAH7	dynein, axonemal, heavy chain 7
ENSG00000119004	CYP20A1	cytochrome P450, family 20, subfamily A, polypeptide 1
ENSG00000119048	UBE2B	ubiquitin-conjugating enzyme E2B
ENSG00000119121	TRPM6	transient receptor potential cation channel, subfamily M, member 6
ENSG00000119138	KLF9	Kruppel-like factor 9
ENSG00000119138	KLF9	Kruppel-like factor 9
ENSG00000119138	KLF9	Kruppel-like factor 9
ENSG00000119280	C1orf198	chromosome 1 open reading frame 198
ENSG00000119280	C1orf198	chromosome 1 open reading frame 198
ENSG00000119318	RAD23B	RAD23 homolog B (S. cerevisiae)
ENSG00000119335	SET	SET nuclear oncogene
ENSG00000119401	TRIM32	tripartite motif containing 32
ENSG00000119408	NEK6	NIMA-related kinase 6
ENSG00000119408	NEK6	NIMA-related kinase 6
ENSG00000119408	NEK6	NIMA-related kinase 6
ENSG00000119457	SLC46A2	solute carrier family 46, member 2
ENSG00000119487	MAPKAP1	mitogen-activated protein kinase associated protein 1
ENSG00000119508	NR4A3	nuclear receptor subfamily 4, group A, member 3
ENSG00000119535	CSF3R	colony stimulating factor 3 receptor (granulocyte)
ENSG00000119559	C19orf25	chromosome 19 open reading frame 25
ENSG00000119638	NEK9	NIMA-related kinase 9
ENSG00000119655	NPC2	Niemann-Pick disease, type C2
ENSG00000119669	IRF2BPL	interferon regulatory factor 2 binding protein-like
ENSG00000119669	IRF2BPL	interferon regulatory factor 2 binding protein-like
ENSG00000119669	IRF2BPL	interferon regulatory factor 2 binding protein-like
ENSG00000119669	IRF2BPL	interferon regulatory factor 2 binding protein-like
ENSG00000119714	GPR68	G protein-coupled receptor 68
ENSG00000119771	KLHL29	kelch-like family member 29
ENSG00000119771	KLHL29	kelch-like family member 29
ENSG00000119771	KLHL29	kelch-like family member 29
ENSG00000119772	DNMT3A	DNA (cytosine-5-)-methyltransferase 3 alpha
ENSG00000119787	ATL2	atlastin GTPase 2
ENSG00000119787	ATL2	atlastin GTPase 2
ENSG00000119801	YPEL5	yippee-like 5 (Drosophila)
ENSG00000119866	BCL11A	B-cell CLL/lymphoma 11A (zinc finger protein)
ENSG00000119906	FAM178A	family with sequence similarity 178, member A
ENSG00000119913	TECTB	tectorin beta
ENSG00000119919	NKX2-3	NK2 homeobox 3
ENSG00000119927	GPAM	glycerol-3-phosphate acyltransferase, mitochondrial
ENSG00000119986	AVPI1	arginine vasopressin-induced 1
ENSG00000119986	AVPI1	arginine vasopressin-induced 1
ENSG00000120049	KCNIP2	Kv channel interacting protein 2
ENSG00000120057	SFRP5	secreted frizzled-related protein 5
ENSG00000120063	GNA13	guanine nucleotide binding protein (G protein), alpha 13
ENSG00000120063	GNA13	guanine nucleotide binding protein (G protein), alpha 13
ENSG00000120071	KANSL1	KAT8 regulatory NSL complex subunit 1
ENSG00000120071	KANSL1	KAT8 regulatory NSL complex subunit 1
ENSG00000120129	DUSP1	dual specificity phosphatase 1
ENSG00000120160	EQTN	equatorin, sperm acrosome associated
ENSG00000120254	MTHFD1L	methylenetetrahydrofolate dehydrogenase (NADP+ dependent) 1-like
ENSG00000120254	MTHFD1L	methylenetetrahydrofolate dehydrogenase (NADP+ dependent) 1-like
ENSG00000120256	LRP11	low density lipoprotein receptor-related protein 11
ENSG00000120265	PCMT1	protein-L-isoaspartate (D-aspartate) O-methyltransferase
ENSG00000120278	PLEKHG1	pleckstrin homology domain containing, family G (with RhoGef domain) member 1
ENSG00000120539	MASTL	microtubule associated serine/threonine kinase-like
ENSG00000120563	LYZL1	lysozyme-like 1
ENSG00000120616	EPC1	enhancer of polycomb homolog 1 (Drosophila)
ENSG00000120688	WBP4	WW domain binding protein 4
ENSG00000120705	ETF1	eukaryotic translation termination factor 1
ENSG00000120708	TGFBI	transforming growth factor, beta-induced, 68kDa
ENSG00000120800	UTP20	UTP20, small subunit (SSU) processome component, homolog (yeast)
ENSG00000120800	UTP20	UTP20, small subunit (SSU) processome component, homolog (yeast)
ENSG00000120833	SOCS2	suppressor of cytokine signaling 2
ENSG00000120896	SORBS3	sorbin and SH3 domain containing 3
ENSG00000120937	NPPB	natriuretic peptide B
ENSG00000120963	ZNF706	zinc finger protein 706
ENSG00000120963	ZNF706	zinc finger protein 706
ENSG00000121005	CRISPLD1	cysteine-rich secretory protein LCCL domain containing 1
ENSG00000121039	RDH10	retinol dehydrogenase 10 (all-trans)
ENSG00000121060	TRIM25	tripartite motif containing 25
ENSG00000121064	SCPEP1	serine carboxypeptidase 1
ENSG00000121068	TBX2	T-box 2
ENSG00000121068	TBX2	T-box 2
ENSG00000121068	TBX2	T-box 2
ENSG00000121068	TBX2	T-box 2
ENSG00000121104	FAM117A	family with sequence similarity 117, member A
ENSG00000121207	LRAT	lecithin retinol acyltransferase (phosphatidylcholine--retinol O-acyltransferase)
ENSG00000121406	ZNF549	zinc finger protein 549
ENSG00000121440	PDZRN3	PDZ domain containing ring finger 3
ENSG00000121577	POPDC2	popeye domain containing 2
ENSG00000121742	GJB6	gap junction protein, beta 6, 30kDa
ENSG00000121743	GJA3	gap junction protein, alpha 3, 46kDa
ENSG00000121774	KHDRBS1	KH domain containing, RNA binding, signal transduction associated 1
ENSG00000121871	SLITRK3	SLIT and NTRK-like family, member 3
ENSG00000121903	ZSCAN20	zinc finger and SCAN domain containing 20
ENSG00000121957	GPSM2	G-protein signaling modulator 2
ENSG00000121964	GTDC1	glycosyltransferase-like domain containing 1
ENSG00000121964	GTDC1	glycosyltransferase-like domain containing 1
ENSG00000122042	UBL3	ubiquitin-like 3
ENSG00000122145	TBX22	T-box 22
ENSG00000122176	FMOD	fibromodulin
ENSG00000122254	HS3ST2	heparan sulfate (glucosamine) 3-O-sulfotransferase 2
ENSG00000122257	RBBP6	retinoblastoma binding protein 6
ENSG00000122257	RBBP6	retinoblastoma binding protein 6
ENSG00000122335	SERAC1	serine active site containing 1
ENSG00000122367	LDB3	LIM domain binding 3
ENSG00000122376	FAM35A	family with sequence similarity 35, member A
ENSG00000122378	FAM213A	family with sequence similarity 213, member A
ENSG00000122390	NAA60	N(alpha)-acetyltransferase 60, NatF catalytic subunit
ENSG00000122406	RPL5	ribosomal protein L5
ENSG00000122481	RWDD3	RWD domain containing 3
ENSG00000122482	ZNF644	zinc finger protein 644
ENSG00000122482	ZNF644	zinc finger protein 644
ENSG00000122490	PQLC1	PQ loop repeat containing 1
ENSG00000122507	BBS9	Bardet-Biedl syndrome 9
ENSG00000122507	BBS9	Bardet-Biedl syndrome 9
ENSG00000122512	PMS2	PMS2 postmeiotic segregation increased 2 (S. cerevisiae)
ENSG00000122515	ZMIZ2	zinc finger, MIZ-type containing 2
ENSG00000122548	KIAA0087	KIAA0087
ENSG00000122574	WIPF3	WAS/WASL interacting protein family, member 3
ENSG00000122584	NXPH1	neurexophilin 1
ENSG00000122591	FAM126A	family with sequence similarity 126, member A
ENSG00000122642	FKBP9	FK506 binding protein 9, 63 kDa
ENSG00000122642	FKBP9	FK506 binding protein 9, 63 kDa
ENSG00000122643	NT5C3A	5'-nucleotidase, cytosolic IIIA
ENSG00000122644	ARL4A	ADP-ribosylation factor-like 4A
ENSG00000122678	POLM	polymerase (DNA directed), mu
ENSG00000122691	TWIST1	twist family bHLH transcription factor 1
ENSG00000122691	TWIST1	twist family bHLH transcription factor 1
ENSG00000122696	SLC25A51	solute carrier family 25, member 51
ENSG00000122705	CLTA	clathrin, light chain A
ENSG00000122705	CLTA	clathrin, light chain A
ENSG00000122729	ACO1	aconitase 1, soluble
ENSG00000122729	ACO1	aconitase 1, soluble
ENSG00000122733	KIAA1045	KIAA1045
ENSG00000122778	KIAA1549	KIAA1549
ENSG00000122786	CALD1	caldesmon 1
ENSG00000122786	CALD1	caldesmon 1
ENSG00000122786	CALD1	caldesmon 1
ENSG00000122863	CHST3	carbohydrate (chondroitin 6) sulfotransferase 3
ENSG00000122958	VPS26A	vacuolar protein sorting 26 homolog A (S. pombe)
ENSG00000122965	RBM19	RNA binding motif protein 19
ENSG00000122966	CIT	citron (rho-interacting, serine/threonine kinase 21)
ENSG00000122966	CIT	citron (rho-interacting, serine/threonine kinase 21)
ENSG00000122966	CIT	citron (rho-interacting, serine/threonine kinase 21)
ENSG00000122970	IFT81	intraflagellar transport 81 homolog (Chlamydomonas)
ENSG00000122970	IFT81	intraflagellar transport 81 homolog (Chlamydomonas)
ENSG00000122971	ACADS	acyl-CoA dehydrogenase, C-2 to C-3 short chain
ENSG00000123066	MED13L	mediator complex subunit 13-like
ENSG00000123095	BHLHE41	basic helix-loop-helix family, member e41
ENSG00000123095	BHLHE41	basic helix-loop-helix family, member e41
ENSG00000123095	BHLHE41	basic helix-loop-helix family, member e41
ENSG00000123104	ITPR2	inositol 1,4,5-trisphosphate receptor, type 2
ENSG00000123106	CCDC91	coiled-coil domain containing 91
ENSG00000123136	DDX39A	DEAD (Asp-Glu-Ala-Asp) box polypeptide 39A
ENSG00000123159	GIPC1	GIPC PDZ domain containing family, member 1
ENSG00000123268	ATF1	activating transcription factor 1
ENSG00000123364	HOXC13	homeobox C13
ENSG00000123415	SMUG1	single-strand-selective monofunctional uracil-DNA glycosylase 1
ENSG00000123505	AMD1	adenosylmethionine decarboxylase 1
ENSG00000123560	PLP1	proteolipid protein 1
ENSG00000123643	SLC36A1	solute carrier family 36 (proton/amino acid symporter), member 1
ENSG00000123892	RAB38	RAB38, member RAS oncogene family
ENSG00000123892	RAB38	RAB38, member RAS oncogene family
ENSG00000123975	CKS2	CDC28 protein kinase regulatory subunit 2
ENSG00000124003	MOGAT1	monoacylglycerol O-acyltransferase 1
ENSG00000124003	MOGAT1	monoacylglycerol O-acyltransferase 1
ENSG00000124019	FAM124B	family with sequence similarity 124B
ENSG00000124098	FAM210B	family with sequence similarity 210, member B
ENSG00000124126	PREX1	phosphatidylinositol-3,4,5-trisphosphate-dependent Rac exchange factor 1
ENSG00000124126	PREX1	phosphatidylinositol-3,4,5-trisphosphate-dependent Rac exchange factor 1
ENSG00000124145	SDC4	syndecan 4
ENSG00000124171	PARD6B	par-6 family cell polarity regulator beta
ENSG00000124171	PARD6B	par-6 family cell polarity regulator beta
ENSG00000124171	PARD6B	par-6 family cell polarity regulator beta
ENSG00000124177	CHD6	chromodomain helicase DNA binding protein 6
ENSG00000124177	CHD6	chromodomain helicase DNA binding protein 6
ENSG00000124177	CHD6	chromodomain helicase DNA binding protein 6
ENSG00000124198	ARFGEF2	ADP-ribosylation factor guanine nucleotide-exchange factor 2 (brefeldin A-inhibited)
ENSG00000124207	CSE1L	CSE1 chromosome segregation 1-like (yeast)
ENSG00000124209	RAB22A	RAB22A, member RAS oncogene family
ENSG00000124212	PTGIS	prostaglandin I2 (prostacyclin) synthase
ENSG00000124216	SNAI1	snail family zinc finger 1
ENSG00000124222	STX16	syntaxin 16
ENSG00000124226	RNF114	ring finger protein 114
ENSG00000124237	C20orf85	chromosome 20 open reading frame 85
ENSG00000124237	C20orf85	chromosome 20 open reading frame 85
ENSG00000124237	C20orf85	chromosome 20 open reading frame 85
ENSG00000124257	NEURL2	neuralized E3 ubiquitin protein ligase 2
ENSG00000124299	PEPD	peptidase D
ENSG00000124357	NAGK	N-acetylglucosamine kinase
ENSG00000124466	LYPD3	LY6/PLAUR domain containing 3
ENSG00000124469	CEACAM8	carcinoembryonic antigen-related cell adhesion molecule 8
ENSG00000124486	USP9X	ubiquitin specific peptidase 9, X-linked
ENSG00000124486	USP9X	ubiquitin specific peptidase 9, X-linked
ENSG00000124610	HIST1H1A	histone cluster 1, H1a
ENSG00000124615	MOCS1	molybdenum cofactor synthesis 1
ENSG00000124688	MAD2L1BP	MAD2L1 binding protein
ENSG00000124772	CPNE5	copine V
ENSG00000124772	CPNE5	copine V
ENSG00000124772	CPNE5	copine V
ENSG00000124782	RREB1	ras responsive element binding protein 1
ENSG00000124782	RREB1	ras responsive element binding protein 1
ENSG00000124782	RREB1	ras responsive element binding protein 1
ENSG00000124782	RREB1	ras responsive element binding protein 1
ENSG00000124783	SSR1	signal sequence receptor, alpha
ENSG00000124785	NRN1	neuritin 1
ENSG00000124785	NRN1	neuritin 1
ENSG00000124788	ATXN1	ataxin 1
ENSG00000124802	EEF1E1	eukaryotic translation elongation factor 1 epsilon 1
ENSG00000124813	RUNX2	runt-related transcription factor 2
ENSG00000124839	RAB17	RAB17, member RAS oncogene family
ENSG00000124839	RAB17	RAB17, member RAS oncogene family
ENSG00000124935	SCGB1D2	secretoglobin, family 1D, member 2
ENSG00000124942	AHNAK	AHNAK nucleoprotein
ENSG00000125089	SH3TC1	SH3 domain and tetratricopeptide repeats 1
ENSG00000125089	SH3TC1	SH3 domain and tetratricopeptide repeats 1
ENSG00000125107	CNOT1	CCR4-NOT transcription complex, subunit 1
ENSG00000125257	ABCC4	ATP-binding cassette, sub-family C (CFTR/MRP), member 4
ENSG00000125375	ATP5S	ATP synthase, H+ transporting, mitochondrial Fo complex, subunit s (factor B)
ENSG00000125378	BMP4	bone morphogenetic protein 4
ENSG00000125459	MSTO1	misato 1, mitochondrial distribution and morphology regulator
ENSG00000125462	C1orf61	chromosome 1 open reading frame 61
ENSG00000125571	IL37	interleukin 37
ENSG00000125629	INSIG2	insulin induced gene 2
ENSG00000125629	INSIG2	insulin induced gene 2
ENSG00000125629	INSIG2	insulin induced gene 2
ENSG00000125633	CCDC93	coiled-coil domain containing 93
ENSG00000125740	FOSB	FBJ murine osteosarcoma viral oncogene homolog B
ENSG00000125741	OPA3	optic atrophy 3 (autosomal recessive, with chorea and spastic paraplegia)
ENSG00000125753	VASP	vasodilator-stimulated phosphoprotein
ENSG00000125753	VASP	vasodilator-stimulated phosphoprotein
ENSG00000125812	GZF1	GDNF-inducible zinc finger protein 1
ENSG00000125817	CENPB	centromere protein B, 80kDa
ENSG00000125818	PSMF1	proteasome (prosome, macropain) inhibitor subunit 1 (PI31)
ENSG00000125826	RBCK1	RanBP-type and C3HC4-type zinc finger containing 1
ENSG00000125841	NRSN2	neurensin 2
ENSG00000125844	RRBP1	ribosome binding protein 1
ENSG00000125851	PCSK2	proprotein convertase subtilisin/kexin type 2
ENSG00000125871	MGME1	mitochondrial genome maintenance exonuclease 1
ENSG00000125875	TBC1D20	TBC1 domain family, member 20
ENSG00000125875	TBC1D20	TBC1 domain family, member 20
ENSG00000125879	OTOR	otoraplin
ENSG00000125903	DEFB129	defensin, beta 129
ENSG00000125952	MAX	MYC associated factor X
ENSG00000125954	FNTB	farnesyltransferase, CAAX box, beta
ENSG00000125968	ID1	inhibitor of DNA binding 1, dominant negative helix-loop-helix protein
ENSG00000125968	ID1	inhibitor of DNA binding 1, dominant negative helix-loop-helix protein
ENSG00000125977	EIF2S2	eukaryotic translation initiation factor 2, subunit 2 beta, 38kDa
ENSG00000125998	FAM83C	family with sequence similarity 83, member C
ENSG00000126001	CEP250	centrosomal protein 250kDa
ENSG00000126088	UROD	uroporphyrinogen decarboxylase
ENSG00000126106	TMEM53	transmembrane protein 53
ENSG00000126106	TMEM53	transmembrane protein 53
ENSG00000126214	KLC1	kinesin light chain 1
ENSG00000126217	MCF2L	MCF.2 cell line derived transforming sequence-like
ENSG00000126261	UBA2	ubiquitin-like modifier activating enzyme 2
ENSG00000126351	THRA	thyroid hormone receptor, alpha
ENSG00000126368	NR1D1	nuclear receptor subfamily 1, group D, member 1
ENSG00000126368	NR1D1	nuclear receptor subfamily 1, group D, member 1
ENSG00000126561	STAT5A	signal transducer and activator of transcription 5A
ENSG00000126602	TRAP1	TNF receptor-associated protein 1
ENSG00000126603	GLIS2	GLIS family zinc finger 2
ENSG00000126698	DNAJC8	DnaJ (Hsp40) homolog, subfamily C, member 8
ENSG00000126709	IFI6	interferon, alpha-inducible protein 6
ENSG00000126773	PCNXL4	pecanex-like 4 (Drosophila)
ENSG00000126775	ATG14	autophagy related 14
ENSG00000126775	ATG14	autophagy related 14
ENSG00000126790	L3HYPDH	L-3-hydroxyproline dehydratase (trans-)
ENSG00000126822	PLEKHG3	pleckstrin homology domain containing, family G (with RhoGef domain) member 3
ENSG00000126822	PLEKHG3	pleckstrin homology domain containing, family G (with RhoGef domain) member 3
ENSG00000126822	PLEKHG3	pleckstrin homology domain containing, family G (with RhoGef domain) member 3
ENSG00000126858	RHOT1	ras homolog family member T1
ENSG00000126861	OMG	oligodendrocyte myelin glycoprotein
ENSG00000126861	OMG	oligodendrocyte myelin glycoprotein
ENSG00000126861	OMG	oligodendrocyte myelin glycoprotein
ENSG00000126878	AIF1L	allograft inflammatory factor 1-like
ENSG00000126934	MAP2K2	mitogen-activated protein kinase kinase 2
ENSG00000126945	HNRNPH2	heterogeneous nuclear ribonucleoprotein H2 (H')
ENSG00000126953	TIMM8A	translocase of inner mitochondrial membrane 8 homolog A (yeast)
ENSG00000127022	CANX	calnexin
ENSG00000127129	EDN2	endothelin 2
ENSG00000127129	EDN2	endothelin 2
ENSG00000127129	EDN2	endothelin 2
ENSG00000127129	EDN2	endothelin 2
ENSG00000127191	TRAF2	TNF receptor-associated factor 2
ENSG00000127241	MASP1	mannan-binding lectin serine peptidase 1 (C4/C2 activating component of Ra-reactive factor)
ENSG00000127241	MASP1	mannan-binding lectin serine peptidase 1 (C4/C2 activating component of Ra-reactive factor)
ENSG00000127252	HRASLS	HRAS-like suppressor
ENSG00000127377	CRYGN	crystallin, gamma N
ENSG00000127377	CRYGN	crystallin, gamma N
ENSG00000127481	UBR4	ubiquitin protein ligase E3 component n-recognin 4
ENSG00000127526	SLC35E1	solute carrier family 35, member E1
ENSG00000127603	MACF1	microtubule-actin crosslinking factor 1
ENSG00000127663	KDM4B	lysine (K)-specific demethylase 4B
ENSG00000127863	TNFRSF19	tumor necrosis factor receptor superfamily, member 19
ENSG00000128050	PAICS	phosphoribosylaminoimidazole carboxylase, phosphoribosylaminoimidazole succinocarboxamide synthetase
ENSG00000128052	KDR	kinase insert domain receptor (a type III receptor tyrosine kinase)
ENSG00000128052	KDR	kinase insert domain receptor (a type III receptor tyrosine kinase)
ENSG00000128052	KDR	kinase insert domain receptor (a type III receptor tyrosine kinase)
ENSG00000128052	KDR	kinase insert domain receptor (a type III receptor tyrosine kinase)
ENSG00000128245	YWHAH	tyrosine 3-monooxygenase/tryptophan 5-monooxygenase activation protein, eta
ENSG00000128253	RFPL2	ret finger protein-like 2
ENSG00000128253	RFPL2	ret finger protein-like 2
ENSG00000128272	ATF4	activating transcription factor 4
ENSG00000128285	MCHR1	melanin-concentrating hormone receptor 1
ENSG00000128342	LIF	leukemia inhibitory factor
ENSG00000128342	LIF	leukemia inhibitory factor
ENSG00000128408	RIBC2	RIB43A domain with coiled-coils 2
ENSG00000128482	RNF112	ring finger protein 112
ENSG00000128512	DOCK4	dedicator of cytokinesis 4
ENSG00000128536	CDHR3	cadherin-related family member 3
ENSG00000128564	VGF	VGF nerve growth factor inducible
ENSG00000128567	PODXL	podocalyxin-like
ENSG00000128641	MYO1B	myosin IB
ENSG00000128641	MYO1B	myosin IB
ENSG00000128891	C15orf57	chromosome 15 open reading frame 57
ENSG00000128923	FAM63B	family with sequence similarity 63, member B
ENSG00000128951	DUT	deoxyuridine triphosphatase
ENSG00000128965	CHAC1	ChaC, cation transport regulator homolog 1 (E. coli)
ENSG00000128973	CLN6	ceroid-lipofuscinosis, neuronal 6, late infantile, variant
ENSG00000129116	PALLD	palladin, cytoskeletal associated protein
ENSG00000129128	SPCS3	signal peptidase complex subunit 3 homolog (S. cerevisiae)
ENSG00000129151	BBOX1	butyrobetaine (gamma), 2-oxoglutarate dioxygenase (gamma-butyrobetaine hydroxylase) 1
ENSG00000129159	KCNC1	potassium voltage-gated channel, Shaw-related subfamily, member 1
ENSG00000129170	CSRP3	cysteine and glycine-rich protein 3 (cardiac LIM protein)
ENSG00000129173	E2F8	E2F transcription factor 8
ENSG00000129187	DCTD	dCMP deaminase
ENSG00000129187	DCTD	dCMP deaminase
ENSG00000129197	RPAIN	RPA interacting protein
ENSG00000129292	PHF20L1	PHD finger protein 20-like 1
ENSG00000129295	LRRC6	leucine rich repeat containing 6
ENSG00000129315	CCNT1	cyclin T1
ENSG00000129351	ILF3	interleukin enhancer binding factor 3, 90kDa
ENSG00000129422	MTUS1	microtubule associated tumor suppressor 1
ENSG00000129422	MTUS1	microtubule associated tumor suppressor 1
ENSG00000129422	MTUS1	microtubule associated tumor suppressor 1
ENSG00000129422	MTUS1	microtubule associated tumor suppressor 1
ENSG00000129521	EGLN3	egl-9 family hypoxia-inducible factor 3
ENSG00000129521	EGLN3	egl-9 family hypoxia-inducible factor 3
ENSG00000129521	EGLN3	egl-9 family hypoxia-inducible factor 3
ENSG00000129521	EGLN3	egl-9 family hypoxia-inducible factor 3
ENSG00000129521	EGLN3	egl-9 family hypoxia-inducible factor 3
ENSG00000129562	DAD1	defender against cell death 1
ENSG00000129562	DAD1	defender against cell death 1
ENSG00000129654	FOXJ1	forkhead box J1
ENSG00000129696	TTI2	TELO2 interacting protein 2
ENSG00000129810	SGOL1	shugoshin-like 1 (S. pombe)
ENSG00000129932	DOHH	deoxyhypusine hydroxylase/monooxygenase
ENSG00000129933	MAU2	MAU2 sister chromatid cohesion factor
ENSG00000129968	ABHD17A	abhydrolase domain containing 17A
ENSG00000130066	SAT1	spermidine/spermine N1-acetyltransferase 1
ENSG00000130147	SH3BP4	SH3-domain binding protein 4
ENSG00000130147	SH3BP4	SH3-domain binding protein 4
ENSG00000130147	SH3BP4	SH3-domain binding protein 4
ENSG00000130147	SH3BP4	SH3-domain binding protein 4
ENSG00000130147	SH3BP4	SH3-domain binding protein 4
ENSG00000130175	PRKCSH	protein kinase C substrate 80K-H
ENSG00000130177	CDC16	cell division cycle 16
ENSG00000130304	SLC27A1	solute carrier family 27 (fatty acid transporter), member 1
ENSG00000130309	COLGALT1	collagen beta(1-O)galactosyltransferase 1
ENSG00000130313	PGLS	6-phosphogluconolactonase
ENSG00000130340	SNX9	sorting nexin 9
ENSG00000130340	SNX9	sorting nexin 9
ENSG00000130340	SNX9	sorting nexin 9
ENSG00000130377	ACSBG2	acyl-CoA synthetase bubblegum family member 2
ENSG00000130385	BMP15	bone morphogenetic protein 15
ENSG00000130429	ARPC1B	actin related protein 2/3 complex, subunit 1B, 41kDa
ENSG00000130429	ARPC1B	actin related protein 2/3 complex, subunit 1B, 41kDa
ENSG00000130479	MAP1S	microtubule-associated protein 1S
ENSG00000130489	SCO2	SCO2 cytochrome c oxidase assembly protein
ENSG00000130513	GDF15	growth differentiation factor 15
ENSG00000130513	GDF15	growth differentiation factor 15
ENSG00000130529	TRPM4	transient receptor potential cation channel, subfamily M, member 4
ENSG00000130589	HELZ2	helicase with zinc finger 2, transcriptional coactivator
ENSG00000130638	ATXN10	ataxin 10
ENSG00000130706	ADRM1	adhesion regulating molecule 1
ENSG00000130749	ZC3H4	zinc finger CCCH-type containing 4
ENSG00000130749	ZC3H4	zinc finger CCCH-type containing 4
ENSG00000130749	ZC3H4	zinc finger CCCH-type containing 4
ENSG00000130772	MED18	mediator complex subunit 18
ENSG00000130787	HIP1R	huntingtin interacting protein 1 related
ENSG00000130803	ZNF317	zinc finger protein 317
ENSG00000130811	EIF3G	eukaryotic translation initiation factor 3, subunit G
ENSG00000130939	UBE4B	ubiquitination factor E4B
ENSG00000130939	UBE4B	ubiquitination factor E4B
ENSG00000130956	HABP4	hyaluronan binding protein 4
ENSG00000130956	HABP4	hyaluronan binding protein 4
ENSG00000130997	POLN	polymerase (DNA directed) nu
ENSG00000131016	AKAP12	A kinase (PRKA) anchor protein 12
ENSG00000131016	AKAP12	A kinase (PRKA) anchor protein 12
ENSG00000131016	AKAP12	A kinase (PRKA) anchor protein 12
ENSG00000131018	SYNE1	spectrin repeat containing, nuclear envelope 1
ENSG00000131019	ULBP3	UL16 binding protein 3
ENSG00000131044	TTLL9	tubulin tyrosine ligase-like family, member 9
ENSG00000131051	RBM39	RNA binding motif protein 39
ENSG00000131055	COX4I2	cytochrome c oxidase subunit IV isoform 2 (lung)
ENSG00000131236	CAP1	CAP, adenylate cyclase-associated protein 1 (yeast)
ENSG00000131238	PPT1	palmitoyl-protein thioesterase 1
ENSG00000131242	RAB11FIP4	RAB11 family interacting protein 4 (class II)
ENSG00000131323	TRAF3	TNF receptor-associated factor 3
ENSG00000131368	MRPS25	mitochondrial ribosomal protein S25
ENSG00000131370	SH3BP5	SH3-domain binding protein 5 (BTK-associated)
ENSG00000131374	TBC1D5	TBC1 domain family, member 5
ENSG00000131386	GALNT15	UDP-N-acetyl-alpha-D-galactosamine:polypeptide N-acetylgalactosaminyltransferase 15
ENSG00000131446	MGAT1	mannosyl (alpha-1,3-)-glycoprotein beta-1,2-N-acetylglucosaminyltransferase
ENSG00000131503	ANKHD1-EIF4EBP3	ANKHD1-EIF4EBP3 readthrough
ENSG00000131584	ACAP3	ArfGAP with coiled-coil, ankyrin repeat and PH domains 3
ENSG00000131626	PPFIA1	protein tyrosine phosphatase, receptor type, f polypeptide (PTPRF), interacting protein (liprin), alpha 1
ENSG00000131634	TMEM204	transmembrane protein 204
ENSG00000131650	KREMEN2	kringle containing transmembrane protein 2
ENSG00000131669	NINJ1	ninjurin 1
ENSG00000131697	NPHP4	nephronophthisis 4
ENSG00000131732	ZCCHC9	zinc finger, CCHC domain containing 9
ENSG00000131773	KHDRBS3	KH domain containing, RNA binding, signal transduction associated 3
ENSG00000131773	KHDRBS3	KH domain containing, RNA binding, signal transduction associated 3
ENSG00000131873	CHSY1	chondroitin sulfate synthase 1
ENSG00000131981	LGALS3	lectin, galactoside-binding, soluble, 3
ENSG00000131981	LGALS3	lectin, galactoside-binding, soluble, 3
ENSG00000132005	RFX1	regulatory factor X, 1 (influences HLA class II expression)
ENSG00000132182	NUP210	nucleoporin 210kDa
ENSG00000132182	NUP210	nucleoporin 210kDa
ENSG00000132305	IMMT	inner membrane protein, mitochondrial
ENSG00000132313	MRPL35	mitochondrial ribosomal protein L35
ENSG00000132361	CLUH	clustered mitochondria (cluA/CLU1) homolog
ENSG00000132386	SERPINF1	serpin peptidase inhibitor, clade F (alpha-2 antiplasmin, pigment epithelium derived factor), member 1
ENSG00000132386	SERPINF1	serpin peptidase inhibitor, clade F (alpha-2 antiplasmin, pigment epithelium derived factor), member 1
ENSG00000132394	EEFSEC	eukaryotic elongation factor, selenocysteine-tRNA-specific
ENSG00000132405	TBC1D14	TBC1 domain family, member 14
ENSG00000132405	TBC1D14	TBC1 domain family, member 14
ENSG00000132405	TBC1D14	TBC1 domain family, member 14
ENSG00000132405	TBC1D14	TBC1 domain family, member 14
ENSG00000132406	TMEM128	transmembrane protein 128
ENSG00000132424	PNISR	PNN-interacting serine/arginine-rich protein
ENSG00000132471	WBP2	WW domain binding protein 2
ENSG00000132478	UNK	unkempt family zinc finger
ENSG00000132510	KDM6B	lysine (K)-specific demethylase 6B
ENSG00000132510	KDM6B	lysine (K)-specific demethylase 6B
ENSG00000132646	PCNA	proliferating cell nuclear antigen
ENSG00000132669	RIN2	Ras and Rab interactor 2
ENSG00000132671	SSTR4	somatostatin receptor 4
ENSG00000132763	MMACHC	methylmalonic aciduria (cobalamin deficiency) cblC type, with homocystinuria
ENSG00000132773	TOE1	target of EGR1, member 1 (nuclear)
ENSG00000132849	INADL	InaD-like (Drosophila)
ENSG00000132879	FBXO44	F-box protein 44
ENSG00000132912	DCTN4	dynactin 4 (p62)
ENSG00000132953	XPO4	exportin 4
ENSG00000132963	POMP	proteasome maturation protein
ENSG00000132970	WASF3	WAS protein family, member 3
ENSG00000133069	TMCC2	transmembrane and coiled-coil domain family 2
ENSG00000133069	TMCC2	transmembrane and coiled-coil domain family 2
ENSG00000133069	TMCC2	transmembrane and coiled-coil domain family 2
ENSG00000133104	SPG20	spastic paraplegia 20 (Troyer syndrome)
ENSG00000133116	KL	klotho
ENSG00000133121	STARD13	StAR-related lipid transfer (START) domain containing 13
ENSG00000133121	STARD13	StAR-related lipid transfer (START) domain containing 13
ENSG00000133121	STARD13	StAR-related lipid transfer (START) domain containing 13
ENSG00000133121	STARD13	StAR-related lipid transfer (START) domain containing 13
ENSG00000133121	STARD13	StAR-related lipid transfer (START) domain containing 13
ENSG00000133121	STARD13	StAR-related lipid transfer (START) domain containing 13
ENSG00000133313	CNDP2	CNDP dipeptidase 2 (metallopeptidase M20 family)
ENSG00000133313	CNDP2	CNDP dipeptidase 2 (metallopeptidase M20 family)
ENSG00000133315	MACROD1	MACRO domain containing 1
ENSG00000133401	PDZD2	PDZ domain containing 2
ENSG00000133401	PDZD2	PDZ domain containing 2
ENSG00000133424	LARGE	like-glycosyltransferase
ENSG00000133454	MYO18B	myosin XVIIIB
ENSG00000133454	MYO18B	myosin XVIIIB
ENSG00000133606	MKRN1	makorin ring finger protein 1
ENSG00000133619	KRBA1	KRAB-A domain containing 1
ENSG00000133816	MICAL2	microtubule associated monooxygenase, calponin and LIM domain containing 2
ENSG00000133816	MICAL2	microtubule associated monooxygenase, calponin and LIM domain containing 2
ENSG00000133818	RRAS2	related RAS viral (r-ras) oncogene homolog 2
ENSG00000133943	C14orf159	chromosome 14 open reading frame 159
ENSG00000133943	C14orf159	chromosome 14 open reading frame 159
ENSG00000133962	CATSPERB	catsper channel auxiliary subunit beta
ENSG00000134014	ELP3	elongator acetyltransferase complex subunit 3
ENSG00000134057	CCNB1	cyclin B1
ENSG00000134058	CDK7	cyclin-dependent kinase 7
ENSG00000134107	BHLHE40	basic helix-loop-helix family, member e40
ENSG00000134107	BHLHE40	basic helix-loop-helix family, member e40
ENSG00000134107	BHLHE40	basic helix-loop-helix family, member e40
ENSG00000134108	ARL8B	ADP-ribosylation factor-like 8B
ENSG00000134115	CNTN6	contactin 6
ENSG00000134138	MEIS2	Meis homeobox 2
ENSG00000134160	TRPM1	transient receptor potential cation channel, subfamily M, member 1
ENSG00000134215	VAV3	vav 3 guanine nucleotide exchange factor
ENSG00000134215	VAV3	vav 3 guanine nucleotide exchange factor
ENSG00000134222	PSRC1	proline/serine-rich coiled-coil 1
ENSG00000134256	CD101	CD101 molecule
ENSG00000134258	VTCN1	V-set domain containing T cell activation inhibitor 1
ENSG00000134294	SLC38A2	solute carrier family 38, member 2
ENSG00000134308	YWHAQ	tyrosine 3-monooxygenase/tryptophan 5-monooxygenase activation protein, theta
ENSG00000134308	YWHAQ	tyrosine 3-monooxygenase/tryptophan 5-monooxygenase activation protein, theta
ENSG00000134313	KIDINS220	kinase D-interacting substrate, 220kDa
ENSG00000134333	LDHA	lactate dehydrogenase A
ENSG00000134369	NAV1	neuron navigator 1
ENSG00000134452	FBXO18	F-box protein, helicase, 18
ENSG00000134489	HRH4	histamine receptor H4
ENSG00000134508	CABLES1	Cdk5 and Abl enzyme substrate 1
ENSG00000134508	CABLES1	Cdk5 and Abl enzyme substrate 1
ENSG00000134508	CABLES1	Cdk5 and Abl enzyme substrate 1
ENSG00000134531	EMP1	epithelial membrane protein 1
ENSG00000134531	EMP1	epithelial membrane protein 1
ENSG00000134532	SOX5	SRY (sex determining region Y)-box 5
ENSG00000134594	RAB33A	RAB33A, member RAS oncogene family
ENSG00000134668	SPOCD1	SPOC domain containing 1
ENSG00000134686	PHC2	polyhomeotic homolog 2 (Drosophila)
ENSG00000134686	PHC2	polyhomeotic homolog 2 (Drosophila)
ENSG00000134686	PHC2	polyhomeotic homolog 2 (Drosophila)
ENSG00000134717	BTF3L4	basic transcription factor 3-like 4
ENSG00000134758	RNF138	ring finger protein 138, E3 ubiquitin protein ligase
ENSG00000134759	ELP2	elongator acetyltransferase complex subunit 2
ENSG00000134760	DSG1	desmoglein 1
ENSG00000134802	SLC43A3	solute carrier family 43, member 3
ENSG00000134909	ARHGAP32	Rho GTPase activating protein 32
ENSG00000134910	STT3A	STT3A, subunit of the oligosaccharyltransferase complex (catalytic)
ENSG00000134954	ETS1	v-ets avian erythroblastosis virus E26 oncogene homolog 1
ENSG00000134954	ETS1	v-ets avian erythroblastosis virus E26 oncogene homolog 1
ENSG00000134954	ETS1	v-ets avian erythroblastosis virus E26 oncogene homolog 1
ENSG00000134954	ETS1	v-ets avian erythroblastosis virus E26 oncogene homolog 1
ENSG00000134954	ETS1	v-ets avian erythroblastosis virus E26 oncogene homolog 1
ENSG00000134982	APC	adenomatous polyposis coli
ENSG00000135002	RFK	riboflavin kinase
ENSG00000135018	UBQLN1	ubiquilin 1
ENSG00000135047	CTSL	cathepsin L
ENSG00000135049	AGTPBP1	ATP/GTP binding protein 1
ENSG00000135063	FAM189A2	family with sequence similarity 189, member A2
ENSG00000135063	FAM189A2	family with sequence similarity 189, member A2
ENSG00000135097	MSI1	musashi RNA-binding protein 1
ENSG00000135111	TBX3	T-box 3
ENSG00000135111	TBX3	T-box 3
ENSG00000135111	TBX3	T-box 3
ENSG00000135218	CD36	CD36 molecule (thrombospondin receptor)
ENSG00000135298	BAI3	brain-specific angiogenesis inhibitor 3
ENSG00000135298	BAI3	brain-specific angiogenesis inhibitor 3
ENSG00000135299	ANKRD6	ankyrin repeat domain 6
ENSG00000135299	ANKRD6	ankyrin repeat domain 6
ENSG00000135299	ANKRD6	ankyrin repeat domain 6
ENSG00000135315	KIAA1009	KIAA1009
ENSG00000135316	SYNCRIP	synaptotagmin binding, cytoplasmic RNA interacting protein
ENSG00000135317	SNX14	sorting nexin 14
ENSG00000135341	MAP3K7	mitogen-activated protein kinase kinase kinase 7
ENSG00000135355	GJA10	gap junction protein, alpha 10, 62kDa
ENSG00000135355	GJA10	gap junction protein, alpha 10, 62kDa
ENSG00000135362	PRR5L	proline rich 5 like
ENSG00000135404	CD63	CD63 molecule
ENSG00000135404	CD63	CD63 molecule
ENSG00000135441	BLOC1S1	biogenesis of lysosomal organelles complex-1, subunit 1
ENSG00000135446	CDK4	cyclin-dependent kinase 4
ENSG00000135535	CD164	CD164 molecule, sialomucin
ENSG00000135540	NHSL1	NHS-like 1
ENSG00000135540	NHSL1	NHS-like 1
ENSG00000135596	MICAL1	microtubule associated monooxygenase, calponin and LIM domain containing 1
[truncated: 3,868 more rows]

## Sheet: MITF-BRG1_cobound-Ontology
Category	Term	Count	%	PValue	Genes	List Total	Pop Hits	Pop Total	Fold Enrichment	Bonferroni	Benjamini	FDR
GOTERM_BP_FAT	GO:0007040~lysosome organization	10	0.7843137254901961	1.7980301690630703E-5	CLN3, NAGPA, TPP1, HEXA, HPS4, HPS1, PPT1, CLN8, CLN6, GBA	895	25	13528	6.046033519553073	0.054741487513582876	0.054741487513582876	0.03252574917227413
GOTERM_BP_FAT	GO:0008104~protein localization	90	7.0588235294117645	3.3871618446210165E-5	GRPEL2, XPO1, RAB3GAP2, SEC24B, TSPO, RAB5B, CROCC, AP1G1, GRIK2, MLPH, CHMP6, CHMP4A, HPS4, NUP188, TIMM50, VPS33A, SSR1, CEP250, ZFYVE16, RAB6B, VPS13B, VPS11, RAB21, CUTA, SYNRG, STX4, ERP29, VPS41, TIMM8A, MAPK1, RAB11FIP3, ATG4B, RAB17, PSEN2, CD81, USO1, TOMM20, RAB5A, TOM1, PDCD6IP, KPNA4, VPS26A, SNX10, SNAP29, SNX9, RAB7A, STX7, LMF1, AKAP12, NAPA, PPT1, CTSA, AKAP10, GIPC1, TIMM13, SNX3…	895	882	13528	1.5423554896819063	0.10062376977319776	0.0516455144689818	0.06126427579693505
GOTERM_BP_FAT	GO:0045184~establishment of protein localization	80	6.2745098039215685	5.163065791320178E-5	GRPEL2, XPO1, RAB3GAP2, TSPO, SEC24B, RAB5B, GRIK2, MLPH, AP1G1, CHMP6, CHMP4A, HPS4, NUP188, TIMM50, VPS33A, SSR1, ZFYVE16, RAB6B, VPS13B, VPS11, RAB21, SYNRG, STX4, ERP29, VPS41, TIMM8A, MAPK1, RAB11FIP3, ATG4B, RAB17, PSEN2, USO1, TOMM20, RAB5A, TOM1, PDCD6IP, KPNA4, VPS26A, SNX10, SNAP29, SNX9, RAB7A, STX7, LMF1, AKAP12, NAPA, PPT1, CTSA, GIPC1, TIMM13, SNX3, CALR, SFT2D2, WDR19, NAGPA, GNPTA…	895	769	13528	1.5724404472179643	0.14926939488913482	0.05246043700182734	0.09337123580134277
GOTERM_BP_FAT	GO:0015031~protein transport	79	6.196078431372549	6.589004255869464E-5	GRPEL2, XPO1, RAB3GAP2, TSPO, SEC24B, RAB5B, GRIK2, MLPH, AP1G1, CHMP6, CHMP4A, HPS4, NUP188, TIMM50, VPS33A, SSR1, ZFYVE16, RAB6B, VPS13B, VPS11, RAB21, SYNRG, STX4, ERP29, VPS41, TIMM8A, MAPK1, RAB11FIP3, ATG4B, RAB17, PSEN2, USO1, TOMM20, RAB5A, TOM1, PDCD6IP, KPNA4, VPS26A, SNX10, SNAP29, SNX9, RAB7A, STX7, LMF1, AKAP12, NAPA, PPT1, CTSA, GIPC1, TIMM13, SNX3, CALR, SFT2D2, WDR19, NAGPA, GNPTA…	895	762	13528	1.56704937022537	0.18641796890354356	0.05026960560728366	0.11914403876196467
GOTERM_BP_FAT	GO:0043473~pigmentation	14	1.0980392156862746	9.870756922693103E-5	SLC45A2, SOX10, BBS5, MLPH, HPS3, MITF, ARL6, MREG, GPR143, VPS33A, DCT, EDNRB, TYR, ASIP	895	59	13528	3.5866300539721623	0.26586963210882897	0.059942025520421716	0.17843547609981414
GOTERM_BP_FAT	GO:0006886~intracellular protein transport	45	3.5294117647058822	1.3511262549845344E-4	RAB3GAP2, XPO1, GRPEL2, SNX9, SEC24B, TSPO, STX7, MLPH, GRIK2, AP1G1, HPS4, AKAP12, NAPA, CTSA, GIPC1, TIMM13, CALR, SSR1, WDR19, NAGPA, ZFYVE16, NPM1, DUSP16, CHM, BCL6, TNPO2, SYNRG, STX4, IPO13, ERP29, NLGN1, VPS41, GABARAP, TIMM8A, MAPK1, YWHAQ, USO1, TOMM20, PTTG1IP, SPTBN1, TOM1, SYTL2, KPNA4, GGA2, SSR3	895	374	13528	1.818659815373585	0.344964739435359	0.06808254453093299	0.24416960154196587
GOTERM_BP_FAT	GO:0034613~cellular protein localization	48	3.7647058823529407	1.592492096588186E-4	RAB3GAP2, XPO1, GRPEL2, SNX9, SEC24B, TSPO, STX7, MLPH, AP1G1, GRIK2, HPS4, AKAP12, NAPA, CTSA, GIPC1, TIMM13, CALR, SSR1, WDR19, NAGPA, ZFYVE16, NPM1, DUSP16, PIKFYVE, CHM, BCL6, TNPO2, SYNRG, STX4, IPO13, ERP29, NLGN1, VPS41, GABARAP, TIMM8A, MAPK1, ID1, BAX, YWHAQ, USO1, TOMM20, PTTG1IP, SPTBN1, TOM1, SYTL2, KPNA4, GGA2, SSR3	895	411	13528	1.7652652611833788	0.3926493521927893	0.06875750533990788	0.2877288374036002
GOTERM_BP_FAT	GO:0048066~pigmentation during development	9	0.7058823529411765	1.886963428754463E-4	DCT, SOX10, SLC45A2, EDNRB, TYR, MLPH, MITF, GPR143, MREG	895	26	13528	5.2321443919209285	0.44615144621952685	0.07119642520986269	0.340847674032263
GOTERM_BP_FAT	GO:0070727~cellular macromolecule localization	48	3.7647058823529407	1.8898308694431252E-4	RAB3GAP2, XPO1, GRPEL2, SNX9, SEC24B, TSPO, STX7, MLPH, AP1G1, GRIK2, HPS4, AKAP12, NAPA, CTSA, GIPC1, TIMM13, CALR, SSR1, WDR19, NAGPA, ZFYVE16, NPM1, DUSP16, PIKFYVE, CHM, BCL6, TNPO2, SYNRG, STX4, IPO13, ERP29, NLGN1, VPS41, GABARAP, TIMM8A, MAPK1, ID1, BAX, YWHAQ, USO1, TOMM20, PTTG1IP, SPTBN1, TOM1, SYTL2, KPNA4, GGA2, SSR3	895	414	13528	1.7524734839284268	0.4466485597463902	0.06363631842249762	0.341364791958787
GOTERM_BP_FAT	GO:0046907~intracellular transport	68	5.333333333333334	2.3988532433087461E-4	XPO1, RAB3GAP2, GRPEL2, TSPO, SEC24B, GRIK2, MLPH, AP1G1, HPS4, TRAPPC2L, SSR1, ZFYVE16, RAB6B, SYNRG, STX4, ERP29, VPS41, WAS, TIMM8A, SLC25A30, MAPK1, NPC2, RPS15, THOC6, USO1, TOMM20, TOM1, KPNA4, VPS26A, SNX9, STX7, AKAP12, DSCR3, NAPA, MYO9B, CTSA, GIPC1, TIMM13, CALR, FTH1, WDR19, NAGPA, SET, SQSTM1, NPM1, DUSP16, PIKFYVE, CHM, VPS35, BCL6, SEC22C, TNPO2, IPO13, MYO1E, NLGN1, WIPI1, GABARAP…	895	657	13528	1.5644226762922715	0.5281862890708215	0.0723651508540002	0.43312238330193154
GOTERM_BP_FAT	GO:0043087~regulation of GTPase activity	20	1.5686274509803921	4.391542998652211E-4	RAB3GAP2, VAV3, ASAP3, TBC1D17, S1PR1, SYDE2, RASGRP3, EVI5, ACAP3, TBC1D14, TBC1D13, GIT2, TBC1D5, RAPGEF6, CHM, BCL6, MLST8, TBC1D20, ARAP1, TBC1D2	895	123	13528	2.4577372030703546	0.7472347579740799	0.11752669331403642	0.7915621772923154
GOTERM_BP_FAT	GO:0051098~regulation of binding	23	1.803921568627451	4.5259419210105816E-4	SIVA1, ICAM1, THRA, MTDH, SMAD7, CALD1, RELA, SKI, DPH3, TAF6L, PYDC1, SIRT1, HDAC4, ID2, SMARCD3, ID1, HMOX1, AGT, BAX, NPM1, IRF4, CALM1, RHEBL1	895	153	13528	2.2722021397013186	0.7576550589892769	0.11140711838823814	0.8156935665609155
GOTERM_BP_FAT	GO:0007049~cell cycle	75	5.88235294117647	8.236102136268524E-4	GAS2L3, LZTS2, LZTS1, CROCC, E2F6, DTYMK, CDC16, RCBTB1, CUL5, CEP250, MC1R, EVI5, CABLES1, KHDRBS1, ARL2, RBBP4, ANAPC5, CRYAA, LIG1, PAPD7, CDK7, INHA, CDK4, TACC1, EML4, MAPK1, PA2G4, TIMELESS, MAPK6, FANCD2, MAPK3, PDCD6IP, CHFR, GADD45A, PPP1R15A, HAUS5, CEP120, USP9X, NEDD9, CHEK2, ANAPC11, CALR, KIAA1009, URGCP, PSMB4, PRR5, NPM1, PSMB2, HINFP, CLASP2, TXNIP, BOD1, TAF1, TRNP1, GMNN, PSRC1…	895	776	13528	1.4608650578817024	0.9242097857175094	0.17999519922867624	1.4796692538998957
GOTERM_BP_FAT	GO:0051101~regulation of DNA binding	19	1.4901960784313726	9.682116059900609E-4	SIVA1, ICAM1, MTDH, THRA, SMAD7, RELA, SKI, TAF6L, PYDC1, SIRT1, HDAC4, ID2, ID1, HMOX1, AGT, NPM1, IRF4, CALM1, RHEBL1	895	121	13528	2.3734429105683548	0.9518261549388216	0.19477899814076294	1.7373109705401735
GOTERM_BP_FAT	GO:0007033~vacuole organization	10	0.7843137254901961	9.81336851921127E-4	CLN3, NAGPA, TPP1, HEXA, HPS4, HPS1, PPT1, CLN8, CLN6, GBA	895	40	13528	3.7787709497206703	0.9537675932217327	0.18530240642429108	1.7606651758160896
GOTERM_BP_FAT	GO:0048008~platelet-derived growth factor receptor signaling pathway	7	0.5490196078431373	0.0010536052511652665	PLAT, TXNIP, ZFAND5, MYO1E, ARID5B, CSRNP1, SRC	895	19	13528	5.5687150837988835	0.9631381117180539	0.18639970260897365	1.8891609492735273
GOTERM_BP_FAT	GO:0006665~sphingolipid metabolic process	14	1.0980392156862746	0.0011586045632675063	CLN3, PSAP, CREM, HEXA, PPT1, SGMS1, ASAH1, P2RX7, SMPDL3A, BAX, SMPD1, CLN8, GBA, CLN6	895	75	13528	2.821482309124767	0.973475699969109	0.19225705690772465	2.0755705381744316
GOTERM_BP_FAT	GO:0042981~regulation of apoptosis	76	5.96078431372549	0.0014152454427656899	RTN4, GRIK2, FASTK, MITF, SGMS1, ARHGAP4, EDNRB, CUL5, FNTA, HMOX1, TERT, NMNAT3, CLN3, ARHGEF3, PTPRF, CRYAA, DFFA, RELA, CYCS, BCL2A1, INHA, PRKCE, CARD10, MAPK1, CARD14, PSEN2, MNT, HSPB1, CTSB, CLN8, MYO18A, PRODH, TRAF1, SIVA1, CDK5R1, APH1A, PPP3R1, PPT1, CHEK2, FEM1B, CALR, SRC, SLC11A2, UTP11L, AHRR, AKT1S1, SQSTM1, AGT, NPM1, MTCH1, DAD1, TNFRSF19, BCL6, SPPL3, TXNIP, ABR, VAV3, KLF10, B…	895	804	13528	1.4287890158147807	0.9881363006232003	0.2183501846569319	2.5297882243416336
GOTERM_BP_FAT	GO:0043067~regulation of programmed cell death	76	5.96078431372549	0.0018399990628310428	RTN4, GRIK2, FASTK, MITF, SGMS1, ARHGAP4, EDNRB, CUL5, FNTA, HMOX1, TERT, NMNAT3, CLN3, ARHGEF3, PTPRF, CRYAA, DFFA, RELA, CYCS, BCL2A1, INHA, PRKCE, CARD10, MAPK1, CARD14, PSEN2, MNT, HSPB1, CTSB, CLN8, MYO18A, PRODH, TRAF1, SIVA1, CDK5R1, APH1A, PPP3R1, PPT1, CHEK2, FEM1B, CALR, SRC, SLC11A2, UTP11L, AHRR, AKT1S1, SQSTM1, AGT, NPM1, MTCH1, DAD1, TNFRSF19, BCL6, SPPL3, TXNIP, ABR, VAV3, KLF10, B…	895	812	13528	1.414712276742714	0.9968688149242141	0.2617640390044249	3.2771710757749206
GOTERM_BP_FAT	GO:0010941~regulation of cell death	76	5.96078431372549	0.0020593197487981585	RTN4, GRIK2, FASTK, MITF, SGMS1, ARHGAP4, EDNRB, CUL5, FNTA, HMOX1, TERT, NMNAT3, CLN3, ARHGEF3, PTPRF, CRYAA, DFFA, RELA, CYCS, BCL2A1, INHA, PRKCE, CARD10, MAPK1, CARD14, PSEN2, MNT, HSPB1, CTSB, CLN8, MYO18A, PRODH, TRAF1, SIVA1, CDK5R1, APH1A, PPP3R1, PPT1, CHEK2, FEM1B, CALR, SRC, SLC11A2, UTP11L, AHRR, AKT1S1, SQSTM1, AGT, NPM1, MTCH1, DAD1, TNFRSF19, BCL6, SPPL3, TXNIP, ABR, VAV3, KLF10, B…	895	815	13528	1.4095047468896733	0.998426382596209	0.2758226163433797	3.6609579884126497
GOTERM_BP_FAT	GO:0042440~pigment metabolic process	10	0.7843137254901961	0.002363925474148496	DCT, SLC45A2, TYR, TSPO, HMOX1, GPR143, UROD, ASIP, APRT, GART	895	45	13528	3.358907510862818	0.9993949580174633	0.2973295486918628	4.191598256953588
GOTERM_BP_FAT	GO:0006643~membrane lipid metabolic process	14	1.0980392156862746	0.0023833761496371746	CLN3, PSAP, CREM, HEXA, PPT1, SGMS1, ASAH1, P2RX7, SMPDL3A, BAX, SMPD1, CLN8, GBA, CLN6	895	81	13528	2.61248361955997	0.9994307880366312	0.2879467788447744	4.22538846335817
GOTERM_BP_FAT	GO:0051648~vesicle localization	9	0.7058823529411765	0.0024401592055236536	SNAP29, BBS5, MLPH, NLGN1, ARL6, YKT6, ASIP, WIPI1, VPS33A	895	37	13528	3.6766420051336253	0.9995237059972195	0.2829329155484419	4.323969029044883
GOTERM_BP_FAT	GO:0051640~organelle localization	15	1.1764705882352942	0.002756231284460839	SNAP29, BBS5, CEP120, MSTO1, NIN, MLPH, NLGN1, ARL6, WIPI1, VPS33A, MAP1S, NPM1, RPS15, ASIP, YKT6	895	92	13528	2.4644158367743505	0.9998234091101112	0.30237236007428914	4.870949481511988
GOTERM_BP_FAT	GO:0048167~regulation of synaptic plasticity	12	0.9411764705882352	0.0029061429313016725	PLAT, NRAS, PPFIA3, LZTS1, GRIK2, AGT, PSEN2, RAB5A, NPTN, GIPC1, BHLHE40, VGF	895	64	13528	2.8340782122905024	0.9998897081894185	0.305452854671318	5.129345857980394
GOTERM_BP_FAT	GO:0006974~response to DNA damage stimulus	40	3.1372549019607843	0.0029791541403939538	C17ORF70, UVRAG, UBE2V2, CHEK2, SLK, HMOX1, HINFP, NSMCE2, BCL6, CRY1, FEN1, REV1, NUDT1, LIG1, TREX2, PAPD7, BRCA2, CDK7, KAT5, CEP63, SIRT1, UBE2B, SMC3, ATM, GTF2H1, PNKP, MAPK1, CUL4A, TIMELESS, FANCD2, BBC3, POLD1, BAX, POLD2, NCOA6, TDG, SUPT16H, PARP1, PPP1R15A, GADD45A	895	373	13528	1.6209205146254888	0.9999123056992255	0.30183119955344007	5.254951951356257
GOTERM_BP_FAT	GO:0051090~regulation of transcription factor activity	16	1.2549019607843137	0.003066976369614424	SIVA1, ICAM1, MTDH, THRA, SMAD7, RELA, TAF6L, PYDC1, SIRT1, HDAC4, ID2, ID1, HMOX1, AGT, NPM1, RHEBL1	895	103	13528	2.3479741823507077	0.9999334434651318	0.29966898604589476	5.405830294075531
GOTERM_BP_FAT	GO:0030004~cellular monovalent inorganic cation homeostasis	7	0.5490196078431373	0.0031229421763926376	CLN3, ATP6V0E1, AGT, ATP6V1H, PPT1, NEDD4L, CLN6	895	23	13528	4.600242895312121	0.9999441718186679	0.29514155083305504	5.501860945826664
GOTERM_BP_FAT	GO:0046148~pigment biosynthetic process	9	0.7058823529411765	0.0034591447736033913	DCT, SLC45A2, TYR, TSPO, GPR143, UROD, ASIP, APRT, GART	895	39	13528	3.488096261280619	0.9999805829278866	0.31210274352883915	6.076808852686888
GOTERM_BP_FAT	GO:0009057~macromolecule catabolic process	72	5.647058823529412	0.0036518989129899603	SAE1, CDC16, CUL5, NCCRP1, WWP2, TPP1, KLHL21, RBCK1, NSMCE2, USP15, FBXL17, NFX1, CLN3, ANAPC5, DFFA, RELA, CYCS, CDK7, SOCS5, UBE2B, GTF2H1, GNS, PNKP, CHID1, ATG4B, PSEN2, TRIM32, KLHL12, ASB2, CHFR, CLN8, FBXL2, CLN6, APH1A, USP9X, RNH1, PPT1, UBE2V2, ANAPC11, FEM1B, DERL3, SUMO3, PSMB4, UBE2D4, SQSTM1, CACYBP, PSMB2, OTUD7B, HNRNPD, FBXO44, USP36, NEDD4L, USP32, FEN1, USP31, RNF144A, UBE4B, …	895	781	13528	1.3934520275538451	0.9999894038999718	0.317391746659208	6.404950050872726
GOTERM_BP_FAT	GO:0006605~protein targeting	26	2.03921568627451	0.004164135038265911	GRPEL2, XPO1, TSPO, MLPH, HPS4, AKAP12, GIPC1, TIMM13, CALR, SSR1, NAGPA, ZFYVE16, DUSP16, BCL6, TNPO2, IPO13, NLGN1, GABARAP, TIMM8A, MAPK1, PTTG1IP, TOMM20, YWHAQ, SPTBN1, KPNA4, SSR3	895	215	13528	1.82787059893465	0.9999978821903819	0.3439089792141188	7.271716224271396
GOTERM_BP_FAT	GO:0051297~centrosome organization	8	0.6274509803921569	0.004209740598926107	HAUS5, CEP250, CROCC, NPM1, TREX2, BRCA2, PCM1, GADD45A	895	32	13528	3.77877094972067	0.9999981650981831	0.33818302692533	7.3485176633877325
GOTERM_BP_FAT	GO:0051452~intracellular pH reduction	5	0.39215686274509803	0.004294891102633355	CLN3, ATP6V0E1, ATP6V1H, PPT1, CLN6	895	11	13528	6.870492635855764	0.9999985961110434	0.33526821256874784	7.4917534174109734
GOTERM_BP_FAT	GO:0016265~death	67	5.254901960784314	0.004649319040973867	RTN4, TSPO, GRIK2, FASTK, SGMS1, ARHGAP4, SHB, SLK, TPP1, HMOX1, ACIN1, BCL7C, CLN3, ARHGEF3, DFFA, CYCS, BCL2A1, TNFRSF14, IL24, ELMO2, RNF130, PSEN2, HSPB1, PLA2G6, PDCD6IP, CLN8, GADD45A, PPP1R15A, CLN6, TRAF1, SIVA1, MFSD8, APH1A, GGCT, PPP3R1, TRIB3, PPT1, FEM1B, RRAGC, SLC11A2, FIS1, AHRR, SQSTM1, MTCH1, DAD1, TNFRSF19, ABR, VAV3, UBE4B, BIRC7, SIRT1, ATM, PLEKHF1, TRAF3IP2, MEF2D, NRAS, P2…	895	724	13528	1.3987715670236738	0.9999995395047443	0.348935119511969	8.085709156968136
GOTERM_BP_FAT	GO:0044265~cellular macromolecule catabolic process	67	5.254901960784314	0.004790908104762298	SAE1, CDC16, CUL5, WWP2, KLHL21, RBCK1, NSMCE2, USP15, FBXL17, NFX1, ANAPC5, DFFA, RELA, CYCS, CDK7, SOCS5, UBE2B, GTF2H1, PNKP, ATG4B, PSEN2, TRIM32, KLHL12, ASB2, CHFR, CLN8, FBXL2, CLN6, APH1A, USP9X, RNH1, PPT1, UBE2V2, ANAPC11, FEM1B, DERL3, SUMO3, PSMB4, UBE2D4, SQSTM1, CACYBP, PSMB2, HNRNPD, OTUD7B, FBXO44, USP36, NEDD4L, USP32, FEN1, USP31, RNF144A, UBE4B, FOXRED2, BIRC7, MARCH8, TRIM63, …	895	725	13528	1.3968422269312273	0.9999997050267214	0.34923773486261556	8.32197764917324
GOTERM_BP_FAT	GO:0008219~cell death	66	5.176470588235294	0.006065648025376493	RTN4, TSPO, GRIK2, FASTK, SGMS1, ARHGAP4, SHB, SLK, TPP1, HMOX1, ACIN1, BCL7C, CLN3, ARHGEF3, DFFA, CYCS, BCL2A1, TNFRSF14, IL24, ELMO2, RNF130, PSEN2, HSPB1, PLA2G6, PDCD6IP, CLN8, GADD45A, PPP1R15A, CLN6, TRAF1, SIVA1, MFSD8, APH1A, GGCT, PPP3R1, TRIB3, PPT1, FEM1B, RRAGC, SLC11A2, FIS1, AHRR, SQSTM1, MTCH1, DAD1, TNFRSF19, ABR, VAV3, UBE4B, BIRC7, SIRT1, ATM, PLEKHF1, TRAF3IP2, MEF2D, NRAS, P2…	895	719	13528	1.3874763987847802	0.9999999946671283	0.4108941099402299	10.42344254526163
GOTERM_BP_FAT	GO:0045851~pH reduction	5	0.39215686274509803	0.00610871891586472	CLN3, ATP6V0E1, ATP6V1H, PPT1, CLN6	895	12	13528	6.297951582867784	0.9999999953437565	0.40459596258383645	10.49364572079009
GOTERM_BP_FAT	GO:0031023~microtubule organizing center organization	8	0.6274509803921569	0.007078641671402903	HAUS5, CEP250, CROCC, NPM1, TREX2, BRCA2, PCM1, GADD45A	895	35	13528	3.4548762968874698	0.9999999997810203	0.44307065413104163	12.060869443666478
GOTERM_BP_FAT	GO:0006281~DNA repair	31	2.431372549019608	0.007393029688347128	C17ORF70, UVRAG, UBE2V2, SLK, HINFP, NSMCE2, CRY1, FEN1, REV1, NUDT1, LIG1, PAPD7, TREX2, BRCA2, CDK7, KAT5, SIRT1, UBE2B, ATM, SMC3, GTF2H1, PNKP, CUL4A, FANCD2, POLD1, POLD2, NCOA6, SUPT16H, TDG, PARP1, GADD45A	895	284	13528	1.649885907624518	0.9999999999187561	0.44884127594863577	12.56327632546369
GOTERM_BP_FAT	GO:0030163~protein catabolic process	58	4.549019607843137	0.007538473036071971	SAE1, CDC16, CUL5, NCCRP1, TPP1, WWP2, KLHL21, RBCK1, NSMCE2, USP15, FBXL17, NFX1, CLN3, ANAPC5, RELA, SOCS5, UBE2B, ATG4B, TRIM32, PSEN2, KLHL12, ASB2, CHFR, CLN8, FBXL2, CLN6, APH1A, USP9X, PPT1, UBE2V2, ANAPC11, FEM1B, DERL3, SUMO3, PSMB4, UBE2D4, SQSTM1, PSMB2, CACYBP, OTUD7B, FBXO44, USP36, NEDD4L, USP32, USP31, RNF144A, UBE4B, FOXRED2, MARCH8, TRIM63, UBE2Q1, UBL5, CCNB1, URM1, P2RX7, CUL4A…	895	622	13528	1.4094451130790926	0.9999999999486509	0.44695137206844116	12.794783112653352
GOTERM_BP_FAT	GO:0043068~positive regulation of programmed cell death	43	3.3725490196078427	0.007936387312179875	SIVA1, CDK5R1, APH1A, GRIK2, FASTK, PPP3R1, CHEK2, FEM1B, SRC, ARHGAP4, CUL5, UTP11L, AHRR, SQSTM1, HMOX1, AGT, MTCH1, TNFRSF19, BCL6, TXNIP, ARHGEF3, VAV3, ABR, PTPRF, DFFA, KLF10, BRCA2, INHA, PRKCE, ATM, PLEKHF1, MAPK1, P2RX7, CUL4A, ETS1, BBC3, BAX, BNIP3L, PSEN2, SMPD1, BIK, FAF1, PRODH	895	433	13528	1.5010360354548622	0.9999999999853701	0.4558263056931996	13.42520011770041
GOTERM_BP_FAT	GO:0048168~regulation of neuronal synaptic plasticity	8	0.6274509803921569	0.008297770392192103	NRAS, PPFIA3, GRIK2, AGT, RAB5A, NPTN, BHLHE40, VGF	895	36	13528	3.3589075108628177	0.9999999999953246	0.46267906864508035	13.994007684838362
GOTERM_BP_FAT	GO:0032400~melanosome localization	5	0.39215686274509803	0.008367907035864819	BBS5, MLPH, ARL6, ASIP, VPS33A	895	13	13528	5.813493768801031	0.9999999999962533	0.4576609879210728	14.103991047379205
GOTERM_BP_FAT	GO:0032318~regulation of Ras GTPase activity	15	1.1764705882352942	0.008377197543346497	ASAP3, TBC1D17, S1PR1, SYDE2, ACAP3, EVI5, TBC1D14, TBC1D13, TBC1D5, GIT2, BCL6, MLST8, TBC1D20, ARAP1, TBC1D2	895	104	13528	2.1800601633003867	0.9999999999963616	0.4504330506467963	14.118549799240576
GOTERM_BP_FAT	GO:0010942~positive regulation of cell death	43	3.3725490196078427	0.00851967108773622	SIVA1, CDK5R1, APH1A, GRIK2, FASTK, PPP3R1, CHEK2, FEM1B, SRC, ARHGAP4, CUL5, UTP11L, AHRR, SQSTM1, HMOX1, AGT, MTCH1, TNFRSF19, BCL6, TXNIP, ARHGEF3, VAV3, ABR, PTPRF, DFFA, KLF10, BRCA2, INHA, PRKCE, ATM, PLEKHF1, MAPK1, P2RX7, CUL4A, ETS1, BBC3, BAX, BNIP3L, PSEN2, SMPD1, BIK, FAF1, PRODH	895	435	13528	1.4941347203493227	0.9999999999976799	0.44861355336262876	14.341522131287409
GOTERM_BP_FAT	GO:0043433~negative regulation of transcription factor activity	9	0.7058823529411765	0.008544320923490261	SIVA1, HDAC4, THRA, ID2, ID1, SMAD7, HMOX1, PYDC1, SIRT1	895	45	13528	3.023016759776536	0.9999999999978536	0.4423757162179186	14.380043798504982
GOTERM_BP_FAT	GO:0006915~apoptosis	56	4.392156862745098	0.009051185495847536	RTN4, TSPO, GRIK2, FASTK, SGMS1, ARHGAP4, SHB, SLK, ACIN1, BCL7C, ARHGEF3, DFFA, BCL2A1, CYCS, TNFRSF14, IL24, ELMO2, RNF130, PSEN2, PDCD6IP, GADD45A, PPP1R15A, TRAF1, SIVA1, APH1A, GGCT, PPP3R1, TRIB3, PPT1, FEM1B, RRAGC, SLC11A2, FIS1, AHRR, SQSTM1, MTCH1, DAD1, TNFRSF19, ABR, VAV3, UBE4B, BIRC7, SIRT1, ATM, PLEKHF1, TRAF3IP2, MEF2D, NRAS, MAP1S, BBC3, CSRNP1, BAX, BNIP3L, BIK, FAF1, IFI6	895	602	13528	1.4060543068728075	0.9999999999995671	0.4543122537295383	15.168530334362861
GOTERM_BP_FAT	GO:0006357~regulation of transcription from RNA polymerase II promoter	65	5.098039215686274	0.01101007068758885	THRA, E2F6, MITF, TCEAL1, EPC1, S1PR1, SMARCD3, MED26, HMOX1, CREB3L4, ALX1, NFX1, ELP3, SOX10, ELP2, RELA, MECP2, CDK7, TAF6L, GTF2H1, GZF1, HES1, CTNNBIP1, NCOA6, MTDH, TFAP4, FHL2, HCFC2, CALR, STAT6, SORBS3, HEXIM1, SQSTM1, TEF, HINFP, BCL6, BCOR, ETV3, SREBF1, TAF1, ESRRA, KLF9, SMAD7, SUB1, MAML1, KLF10, SKI, NR4A3, KAT5, SIRT1, STAT2, ATF6, DLX2, HDAC4, ATF4, PKNOX1, ID2, DBP, ETS1, ID1, A…	895	727	13528	1.351417396048658	0.9999999999999991	0.5142982813023701	18.151787696289656
GOTERM_BP_FAT	GO:0051875~pigment granule localization	5	0.39215686274509803	0.011111445697500718	BBS5, MLPH, ARL6, ASIP, VPS33A	895	14	13528	5.398244213886672	0.9999999999999993	0.5103050952535177	18.30344554785749
GOTERM_BP_FAT	GO:0030318~melanocyte differentiation	5	0.39215686274509803	0.011111445697500718	SOX10, EDNRB, MLPH, MITF, MREG	895	14	13528	5.398244213886672	0.9999999999999993	0.5103050952535177	18.30344554785749
GOTERM_BP_FAT	GO:0051453~regulation of intracellular pH	5	0.39215686274509803	0.011111445697500718	CLN3, ATP6V0E1, ATP6V1H, PPT1, CLN6	895	14	13528	5.398244213886672	0.9999999999999993	0.5103050952535177	18.30344554785749
GOTERM_BP_FAT	GO:0043065~positive regulation of apoptosis	42	3.294117647058824	0.011240177804847287	SIVA1, CDK5R1, APH1A, FASTK, PPP3R1, CHEK2, FEM1B, SRC, ARHGAP4, CUL5, UTP11L, AHRR, SQSTM1, HMOX1, AGT, MTCH1, TNFRSF19, BCL6, TXNIP, ARHGEF3, VAV3, ABR, PTPRF, DFFA, KLF10, BRCA2, INHA, PRKCE, ATM, PLEKHF1, MAPK1, P2RX7, CUL4A, ETS1, BBC3, BAX, BNIP3L, PSEN2, SMPD1, BIK, FAF1, PRODH	895	430	13528	1.476357022216448	0.9999999999999996	0.5072954545905961	18.495647253795333
GOTERM_BP_FAT	GO:0006366~transcription from RNA polymerase II promoter	26	2.03921568627451	0.011922510180520577	POLR2H, CCRN4L, THRA, TSC22D1, MAX, GTF2A1, PIR, MED26, ETV1, BTF3, NFX1, ALX1, TAF1, MAFF, AFF4, CDK7, GTF2H1, IRF9, ADRM1, TCFL5, ETS1, NCOA6, THRAP3, MNT, SUPT16H, PARP1	895	234	13528	1.679453755431409	1.0	0.5211399722718433	19.507281797971878
GOTERM_BP_FAT	GO:0012501~programmed cell death	56	4.392156862745098	0.011941724146141053	RTN4, TSPO, GRIK2, FASTK, SGMS1, ARHGAP4, SHB, SLK, ACIN1, BCL7C, ARHGEF3, DFFA, BCL2A1, CYCS, TNFRSF14, IL24, ELMO2, RNF130, PSEN2, PDCD6IP, GADD45A, PPP1R15A, TRAF1, SIVA1, APH1A, GGCT, PPP3R1, TRIB3, PPT1, FEM1B, RRAGC, SLC11A2, FIS1, AHRR, SQSTM1, MTCH1, DAD1, TNFRSF19, ABR, VAV3, UBE4B, BIRC7, SIRT1, ATM, PLEKHF1, TRAF3IP2, MEF2D, NRAS, MAP1S, BBC3, CSRNP1, BAX, BNIP3L, BIK, FAF1, IFI6	895	611	13528	1.3853431959696076	1.0	0.5148791759297133	19.53559620640325
GOTERM_BP_FAT	GO:0042438~melanin biosynthetic process	4	0.3137254901960784	0.012528089792106675	DCT, SLC45A2, TYR, ASIP	895	8	13528	7.55754189944134	1.0	0.5251602684592842	20.395174830361928
GOTERM_BP_FAT	GO:0051099~positive regulation of binding	12	0.9411764705882352	0.013161850135642611	ICAM1, HDAC4, MTDH, RELA, CALD1, AGT, NPM1, SKI, IRF4, DPH3, CALM1, RHEBL1	895	78	13528	2.3253975075204125	1.0	0.5361575202716589	21.314472898985926
GOTERM_BP_FAT	GO:0050931~pigment cell differentiation	5	0.39215686274509803	0.01437326205593373	SOX10, EDNRB, MLPH, MITF, MREG	895	15	13528	5.038361266294228	1.0	0.5614001966111282	23.043842157563923
GOTERM_BP_FAT	GO:0006767~water-soluble vitamin metabolic process	8	0.6274509803921569	0.01474626626596922	NMNAT3, PDXK, AKR1A1, RFK, SLC23A2, MCCC1, QPRT, SLC19A2	895	40	13528	3.023016759776536	1.0	0.5642182214055713	23.56905780930848
GOTERM_BP_FAT	GO:0051253~negative regulation of RNA metabolic process	36	2.823529411764706	0.014895288260058377	SBNO2, MTDH, E2F6, CALR, TCEAL1, CBFA2T2, EPC1, SORBS3, HEXIM1, NPM1, BCL6, BHLHE40, BCOR, ALX1, ETV3, NFX1, SMAD7, ARID5B, KLF10, LDB1, MECP2, ILF3, SKI, KAT5, SIRT1, GZF1, HES1, CTNNBIP1, HDAC4, DLX2, PA2G4, HILS1, ID2, ID1, MLX, YWHAQ	895	362	13528	1.503157504861261	1.0	0.5614802355927363	23.77794281696344
GOTERM_BP_FAT	GO:0033554~cellular response to stress	52	4.07843137254902	0.014950919839614009	UVRAG, AQP2, INSIG2, SLK, HMOX1, NSMCE2, CRY1, CLN3, NUDT1, REV1, LIG1, PAPD7, CDK7, UBE2B, GTF2H1, MAPK1, PNKP, ADM, TIMELESS, FANCD2, NCOA6, GADD45A, PPP1R15A, MAP3K12, C17ORF70, UBE2V2, CHEK2, DERL3, SLC11A2, HINFP, TNFRSF19, BCL6, FEN1, SREBF1, BIRC7, TREX2, BRCA2, CEP63, KAT5, SIRT1, ATM, SMC3, ATF6, ATF4, CUL4A, BBC3, POLD1, BAX, POLD2, TDG, SUPT16H, PARP1	895	566	13528	1.3886649426535327	1.0	0.5565570400377526	23.85578358972905
GOTERM_BP_FAT	GO:0006308~DNA catabolic process	10	0.7843137254901961	0.01632435621309174	PNKP, DFFA, BAX, CYCS, TDG, BIRC7, PPT1, UBE2V2, CDK7, GTF2H1	895	60	13528	2.519180633147114	1.0	0.5824898388946759	25.753876933165287
GOTERM_BP_FAT	GO:0043392~negative regulation of DNA binding	9	0.7058823529411765	0.01783648142028555	SIVA1, HDAC4, THRA, ID2, ID1, SMAD7, HMOX1, PYDC1, SIRT1	895	51	13528	2.6673677292145905	1.0	0.6090469896666026	27.79190783236508
GOTERM_BP_FAT	GO:0006582~melanin metabolic process	4	0.3137254901960784	0.017879829844354045	DCT, SLC45A2, TYR, ASIP	895	9	13528	6.717815021725635	1.0	0.6038796295069917	27.84954579860105
GOTERM_BP_FAT	GO:0030641~regulation of cellular pH	5	0.39215686274509803	0.018181993268276624	CLN3, ATP6V0E1, ATP6V1H, PPT1, CLN6	895	16	13528	4.723463687150838	1.0	0.6041185607342723	28.25010975112705
GOTERM_BP_FAT	GO:0006672~ceramide metabolic process	8	0.6274509803921569	0.019043639775118894	CLN3, P2RX7, HEXA, SMPD1, SGMS1, CLN8, ASAH1, CLN6	895	42	13528	2.879063580739558	1.0	0.6154058123507711	29.380848512254598
GOTERM_BP_FAT	GO:0045892~negative regulation of transcription, DNA-dependent	35	2.7450980392156863	0.019367293552037833	SBNO2, MTDH, E2F6, CALR, TCEAL1, CBFA2T2, EPC1, SORBS3, HEXIM1, BCL6, BHLHE40, BCOR, ALX1, ETV3, NFX1, SMAD7, ARID5B, KLF10, LDB1, MECP2, ILF3, SKI, KAT5, SIRT1, GZF1, HES1, CTNNBIP1, HDAC4, DLX2, PA2G4, HILS1, ID2, ID1, MLX, YWHAQ	895	356	13528	1.4860335195530727	1.0	0.6158720697303149	29.801213377763215
GOTERM_BP_FAT	GO:0010605~negative regulation of macromolecule metabolic process	64	5.019607843137255	0.019450147873323477	THRA, MASP1, E2F6, CDC16, TCEAL1, CBFA2T2, EPC1, FNTA, PBXIP1, WWP2, LAG3, ALX1, NFX1, KHDRBS1, CLN3, ANAPC5, ARID5B, LDB1, RELA, MECP2, INHA, GZF1, HES1, CTNNBIP1, PA2G4, TIMELESS, PSEN2, CLN8, SBNO2, MTDH, GIPC1, ANAPC11, CALR, PSMB4, SORBS3, SET, HEXIM1, NPM1, PSMB2, HINFP, BCL6, BHLHE40, BCOR, ETV3, NF2, SMAD7, GMNN, KLF10, ZNF24, BRCA2, ILF3, SKI, KAT5, SIRT1, DLX2, HDAC4, HILS1, ID2, ID1, B…	895	734	13528	1.3179364620279177	1.0	0.6117593759006602	29.908444758727004
GOTERM_BP_FAT	GO:0051650~establishment of vesicle localization	7	0.5490196078431373	0.01952804657818675	SNAP29, BBS5, NLGN1, ARL6, YKT6, ASIP, WIPI1	895	33	13528	3.2062298967326903	1.0	0.6076353272674881	30.009121346297718
GOTERM_BP_FAT	GO:0006997~nucleus organization	9	0.7058823529411765	0.019898979424196772	ETS1, DFFA, ATXN7, BAX, CYCS, LMNA, BIRC7, PPT1, ACIN1	895	52	13528	2.6160721959604643	1.0	0.6090918779423328	30.48664517078531
GOTERM_BP_FAT	GO:0012502~induction of programmed cell death	32	2.5098039215686274	0.02158524836259365	SIVA1, APH1A, GRIK2, FASTK, CHEK2, FEM1B, ARHGAP4, CUL5, UTP11L, AHRR, SQSTM1, HMOX1, TNFRSF19, ARHGEF3, VAV3, ABR, DFFA, KLF10, BRCA2, INHA, PRKCE, ATM, PLEKHF1, MAPK1, CUL4A, BBC3, ETS1, BAX, BNIP3L, PSEN2, BIK, PRODH	895	321	13528	1.5067996310412641	1.0	0.6338664493064936	32.61894141098538
GOTERM_BP_FAT	GO:0006944~membrane fusion	9	0.7058823529411765	0.022125614747812716	SNAP29, CLN3, STX4, P2RX7, VAV3, VAPA, BAX, USO1, NAPA	895	53	13528	2.566712343206493	1.0	0.6376930136190696	33.28905991333303
GOTERM_BP_FAT	GO:0007042~lysosomal lumen acidification	3	0.2352941176470588	0.02393132238470814	CLN3, PPT1, CLN6	895	4	13528	11.33631284916201	1.0	0.6615673446148734	35.48296921121536
GOTERM_BP_FAT	GO:0009116~nucleoside metabolic process	10	0.7843137254901961	0.024090664361513664	PANK1, ADK, NT5C3, DTYMK, UPP1, DCK, QTRT1, PPCDC, DCAKD, APRT	895	64	13528	2.361731843575419	1.0	0.6588285710518315	35.67325899049661
GOTERM_BP_FAT	GO:0051336~regulation of hydrolase activity	33	2.588235294117647	0.024360061014946928	SIVA1, RAB3GAP2, PXK, ASAP3, SLC11A2, EDNRB, FNTA, S1PR1, TBC1D17, EVI5, RASGRP3, TBC1D14, S1PR4, AGT, MTCH1, TBC1D13, GIT2, CHM, RAPGEF6, TBC1D5, BCL6, MLST8, TBC1D2, VAV3, CYCS, SIRT1, ACAP3, SYDE2, BBC3, BAX, TBC1D20, IFI6, ARAP1	895	337	13528	1.4801120633920728	1.0	0.6578275282687037	35.99377304740145
GOTERM_BP_FAT	GO:0008629~induction of apoptosis by intracellular signals	9	0.7058823529411765	0.024522402585190863	CUL5, CUL4A, BBC3, HMOX1, BAX, BRCA2, CHEK2, ATM, PRODH	895	54	13528	2.519180633147114	1.0	0.6552331004991494	36.186189406102756
GOTERM_BP_FAT	GO:0030262~apoptotic nuclear changes	6	0.4705882352941176	0.025663856114576767	DFFA, BAX, CYCS, BIRC7, PPT1, ACIN1	895	26	13528	3.4880962612806186	1.0	0.6671406660464645	37.52375515860604
GOTERM_BP_FAT	GO:0006687~glycosphingolipid metabolic process	6	0.4705882352941176	0.025663856114576767	CLN3, PSAP, HEXA, CREM, BAX, CLN6	895	26	13528	3.4880962612806186	1.0	0.6671406660464645	37.52375515860604
GOTERM_BP_FAT	GO:0046519~sphingoid metabolic process	8	0.6274509803921569	0.027022797509272313	CLN3, P2RX7, HEXA, SMPD1, SGMS1, CLN8, ASAH1, CLN6	895	45	13528	2.6871260086902544	1.0	0.6813412091761781	39.08163918324943
GOTERM_BP_FAT	GO:0055067~monovalent inorganic cation homeostasis	8	0.6274509803921569	0.027022797509272313	CLN3, EDNRB, ATP6V0E1, AGT, ATP6V1H, PPT1, NEDD4L, CLN6	895	45	13528	2.6871260086902544	1.0	0.6813412091761781	39.08163918324943
GOTERM_BP_FAT	GO:0044257~cellular protein catabolic process	53	4.156862745098039	0.02940318705791486	SAE1, CDC16, CUL5, WWP2, NSMCE2, RBCK1, KLHL21, USP15, FBXL17, NFX1, ANAPC5, RELA, SOCS5, UBE2B, ATG4B, TRIM32, PSEN2, KLHL12, ASB2, CHFR, CLN8, FBXL2, APH1A, USP9X, UBE2V2, ANAPC11, FEM1B, DERL3, SUMO3, UBE2D4, PSMB4, SQSTM1, PSMB2, CACYBP, OTUD7B, FBXO44, USP36, NEDD4L, USP32, USP31, RNF144A, FOXRED2, UBE4B, MARCH8, TRIM63, UBE2Q1, UBL5, CCNB1, URM1, P2RX7, CUL4A, FAF1, USP48	895	603	13528	1.3285231199681296	1.0	0.7075610751496781	41.72243351958348
GOTERM_BP_FAT	GO:0016044~membrane organization	36	2.823529411764706	0.02989111623542108	SNAP29, RAB7A, SEC24B, STX7, VAPA, AP1G1, NAPA, TIMM50, PPT1, TIMM13, SNX3, ABCA4, FTH1, PICALM, PACSIN2, PIKFYVE, MTCH1, SCARB1, CLN3, SYNRG, STX4, VAV3, HCK, LMNA, ATP6V1H, ELMO2, TIMM8A, NRAS, P2RX7, FNBP1L, BAX, RAB5A, USO1, TOM1, LRP8, CLN8	895	381	13528	1.4281968943826155	1.0	0.7088679793311393	42.25021188138661
GOTERM_BP_FAT	GO:0006351~transcription, DNA-dependent	29	2.2745098039215685	0.030245559750741897	POLR2H, CCRN4L, THRA, IVNS1ABP, TSC22D1, MAX, GTF2A1, PIR, MED26, ETV1, BTF3, NFX1, ALX1, TAF1, MAFF, POLR3H, AFF4, CDK7, TAF6L, GTF2H1, IRF9, ADRM1, TCFL5, ETS1, NCOA6, THRAP3, MNT, SUPT16H, PARP1	895	292	13528	1.501155582765746	1.0	0.7085325641189535	42.63076779842603
GOTERM_BP_FAT	GO:0007264~small GTPase mediated signal transduction	30	2.3529411764705883	0.030575413718596636	RAB7A, RAB5B, MYO9B, SRC, RRAGC, RAB42, ARHGAP4, RASGRP3, HMOX1, RAPGEF6, RAB6B, RAB21, RHEBL1, ARL2, ARHGEF3, ABR, VAV3, MAP2K2, GEM, ARL6, MAPK1, RAB32, NRAS, MAPK3, RAB17, YWHAQ, RAB5A, RIT1, ARL4A, BCAR3	895	305	13528	1.4867295539884606	1.0	0.70791332471255	42.98279323707729
GOTERM_BP_FAT	GO:0006684~sphingomyelin metabolic process	4	0.3137254901960784	0.031811737962107484	CLN3, SMPDL3A, SMPD1, SGMS1	895	11	13528	5.496394108684611	1.0	0.7178356217353462	44.284144444902665
GOTERM_BP_FAT	GO:0032006~regulation of TOR signaling pathway	4	0.3137254901960784	0.031811737962107484	AKT1S1, GOLPH3, SLC7A1, MLST8	895	11	13528	5.496394108684611	1.0	0.7178356217353462	44.284144444902665
GOTERM_BP_FAT	GO:0006309~DNA fragmentation involved in apoptosis	5	0.39215686274509803	0.03309560738796971	DFFA, BAX, CYCS, BIRC7, PPT1	895	19	13528	3.9776536312849164	1.0	0.7277233482087935	45.60581221397866
GOTERM_BP_FAT	GO:0046626~regulation of insulin receptor signaling pathway	5	0.39215686274509803	0.03309560738796971	GRB10, PTPRF, RELA, PTPN1, SRC	895	19	13528	3.9776536312849164	1.0	0.7277233482087935	45.60581221397866
GOTERM_BP_FAT	GO:0006917~induction of apoptosis	31	2.431372549019608	0.03310974198567393	SIVA1, APH1A, FASTK, CHEK2, FEM1B, ARHGAP4, CUL5, UTP11L, AHRR, SQSTM1, HMOX1, TNFRSF19, ARHGEF3, ABR, VAV3, DFFA, KLF10, BRCA2, INHA, PRKCE, ATM, PLEKHF1, MAPK1, CUL4A, BBC3, ETS1, BAX, BNIP3L, PSEN2, BIK, PRODH	895	320	13528	1.4642737430167596	1.0	0.7235235750566499	45.62019672909038
GOTERM_BP_FAT	GO:0046942~carboxylic acid transport	17	1.3333333333333335	0.033465258704842814	SLC36A1, CLN3, SLC38A7, CELSR3, SLC6A15, SLC19A1, SLC26A1, SLC7A7, SLC1A4, SLC16A1, SLC25A13, SLC16A7, SLC23A2, SLC7A1, SLC25A26, CLN8, SLC43A1	895	147	13528	1.7480028883061605	1.0	0.7230762614312435	45.980819694591766
GOTERM_BP_FAT	GO:0006865~amino acid transport	12	0.9411764705882352	0.03459913335354771	SLC1A4, SLC36A1, CLN3, SLC25A13, SLC38A7, SLC7A1, SLC6A15, SLC25A26, SLC19A1, SLC43A1, CLN8, SLC7A7	895	90	13528	2.0153445065176907	1.0	0.730848292486461	47.11594561242076
GOTERM_BP_FAT	GO:0043523~regulation of neuron apoptosis	12	0.9411764705882352	0.03459913335354771	SPPL3, NMNAT3, NRAS, CLN3, CDK5R1, AKT1S1, PTPRF, GRIK2, AGT, BAX, PPT1, ATM	895	90	13528	2.0153445065176907	1.0	0.730848292486461	47.11594561242076
GOTERM_BP_FAT	GO:0044092~negative regulation of molecular function	32	2.5098039215686274	0.034764209585130046	CAST, SIVA1, THRA, TRIB3, ANAPC11, CDC16, PXK, PYDC1, EDNRB, PSMB4, AKT1S1, S1PR1, HEXIM1, WWP2, HMOX1, PSMB2, DUSP16, CLN3, NF2, ANAPC5, SMAD7, NPY1R, SIRT1, HDAC4, GNAL, ID2, ID1, ZFYVE28, GADD45A, CLN8, IFI6, CALM1	895	334	13528	1.4481517412103166	1.0	0.7283764673003897	47.27931253950778
GOTERM_BP_FAT	GO:0015849~organic acid transport	17	1.3333333333333335	0.03531946759935248	SLC36A1, CLN3, SLC38A7, CELSR3, SLC6A15, SLC19A1, SLC26A1, SLC7A7, SLC1A4, SLC16A1, SLC25A13, SLC16A7, SLC23A2, SLC7A1, SLC25A26, CLN8, SLC43A1	895	148	13528	1.7361920579797676	1.0	0.729945777789996	47.825329062276445
GOTERM_BP_FAT	GO:0010629~negative regulation of gene expression	45	3.5294117647058822	0.035397323148120816	SBNO2, THRA, MTDH, E2F6, CALR, TCEAL1, CBFA2T2, EPC1, SORBS3, PBXIP1, WWP2, HEXIM1, HINFP, BCL6, BHLHE40, BCOR, ALX1, ETV3, NFX1, KHDRBS1, SMAD7, ARID5B, LDB1, KLF10, MECP2, ZNF24, ILF3, SKI, KAT5, SIRT1, GZF1, HES1, CTNNBIP1, HDAC4, DLX2, PA2G4, HILS1, ID2, TIMELESS, ID1, MLX, BAX, BNIP3L, YWHAQ, ADAR	895	504	13528	1.349561053471668	1.0	0.7266465476825843	47.90146037569251
GOTERM_BP_FAT	GO:0032774~RNA biosynthetic process	29	2.2745098039215685	0.035743500820258255	POLR2H, CCRN4L, THRA, IVNS1ABP, TSC22D1, MAX, GTF2A1, PIR, MED26, ETV1, BTF3, NFX1, ALX1, TAF1, MAFF, POLR3H, AFF4, CDK7, TAF6L, GTF2H1, IRF9, ADRM1, TCFL5, ETS1, NCOA6, THRAP3, MNT, SUPT16H, PARP1	895	296	13528	1.4808696965121546	1.0	0.726108222679318	48.23870242183506
GOTERM_BP_FAT	GO:0016197~endosome transport	9	0.7058823529411765	0.03592116474337763	SQSTM1, ZFYVE16, PIKFYVE, TOM1, VPS35, YKT6, WAS, WIPI1, VPS26A	895	58	13528	2.3454440377576575	1.0	0.7238894281681783	48.410978579521434
GOTERM_BP_FAT	GO:0045767~regulation of anti-apoptosis	7	0.5490196078431373	0.036874588129360966	RTN4, SIVA1, ADM, SMAD7, HMOX1, BAX, SIRT1	895	38	13528	2.7843575418994417	1.0	0.7293897790705425	49.326273434146316
GOTERM_BP_FAT	GO:0051656~establishment of organelle localization	10	0.7843137254901961	0.03709924526433174	SNAP29, BBS5, MAP1S, RPS15, NPM1, NLGN1, ARL6, YKT6, ASIP, WIPI1	895	69	13528	2.1905918549105334	1.0	0.7276695027782705	49.53970160876248
GOTERM_BP_FAT	GO:0005996~monosaccharide metabolic process	23	1.803921568627451	0.03715636109332887	ALDOA, IRS2, GNPDA1, LDHAL6B, PFKFB3, CREM, FN3K, OGDHL, GYG2, NPY1R, GYG1, NAGK, OGDH, EXTL2, CPT1A, SLC2A8, LEP, MAN2A2, ATF4, GBE1, AKR1A1, FUT3, NANP	895	222	13528	1.5659771503346924	1.0	0.7243488531168413	49.59382708077955
GOTERM_BP_FAT	GO:0051172~negative regulation of nitrogen compound metabolic process	46	3.607843137254902	0.037479584382941036	SBNO2, THRA, MTDH, E2F6, COMT, CALR, TCEAL1, CBFA2T2, EPC1, SORBS3, PBXIP1, HEXIM1, NPM1, HINFP, BCL6, BHLHE40, BCOR, ALX1, ETV3, NFX1, KHDRBS1, NF2, SMAD7, ARID5B, LDB1, GMNN, KLF10, MECP2, ZNF24, BRCA2, ILF3, SKI, KAT5, SIRT1, GZF1, HES1, CTNNBIP1, HDAC4, DLX2, PA2G4, HILS1, ID2, TIMELESS, ID1, MLX, YWHAQ	895	519	13528	1.3396798742747658	1.0	0.7236443717386776	49.89909570317156
GOTERM_BP_FAT	GO:0006259~DNA metabolic process	45	3.5294117647058822	0.03784345178018056	C17ORF70, UVRAG, PPT1, UBE2V2, SET, SLK, NT5M, POLM, HINFP, NSMCE2, CRY1, TERT, FEN1, C5ORF51, RBBP4, REV1, NUDT1, DFFA, NOL8, LIG1, CYCS, TREX2, PAPD7, BIRC7, PPFIBP2, BRCA2, CDK7, KAT5, SIRT1, UBE2B, SMC3, ATM, GTF2H1, PNKP, CUL4A, FANCD2, POLD1, BAX, POLD2, NCOA6, TDG, SUPT16H, PARP1, MYO18A, GADD45A	895	506	13528	1.3442268200587366	1.0	0.7233437093690125	50.240660651602965
GOTERM_BP_FAT	GO:0019987~negative regulation of anti-apoptosis	3	0.2352941176470588	0.0381520412613138	RTN4, SIVA1, BAX	895	5	13528	9.069050279329609	1.0	0.7225252806397893	50.528610640787555
GOTERM_BP_FAT	GO:0051603~proteolysis involved in cellular protein catabolic process	52	4.07843137254902	0.038739618507165875	SAE1, CDC16, CUL5, WWP2, NSMCE2, RBCK1, KLHL21, USP15, FBXL17, NFX1, ANAPC5, RELA, SOCS5, UBE2B, ATG4B, TRIM32, PSEN2, KLHL12, ASB2, CHFR, FBXL2, APH1A, USP9X, UBE2V2, ANAPC11, FEM1B, DERL3, SUMO3, UBE2D4, PSMB4, SQSTM1, PSMB2, CACYBP, OTUD7B, FBXO44, USP36, NEDD4L, USP32, USP31, RNF144A, FOXRED2, UBE4B, MARCH8, TRIM63, UBE2Q1, UBL5, CCNB1, URM1, P2RX7, CUL4A, FAF1, USP48	895	600	13528	1.309973929236499	1.0	0.7243437953736784	51.072541737301904
GOTERM_BP_FAT	GO:0007005~mitochondrion organization	16	1.2549019607843137	0.039026938594785725	GRPEL2, TSPO, MSTO1, CRYAA, GGCT, MPV17, TIMM50, TIMM13, TIMM8A, FIS1, P2RX7, BBC3, BAX, TOMM20, CLN8, IFI6	895	138	13528	1.7524734839284266	1.0	0.7233399271388645	51.33645769134705
GOTERM_BP_FAT	GO:0009411~response to UV	9	0.7058823529411765	0.039248371784292864	REV1, MC1R, RELA, POLD1, BAX, UBE4B, BRCA2, UBE2B, FEN1	895	59	13528	2.305690748982104	1.0	0.7217447801747219	51.53893542010488
GOTERM_BP_FAT	GO:0051100~negative regulation of binding	9	0.7058823529411765	0.039248371784292864	SIVA1, HDAC4, THRA, ID2, ID1, SMAD7, HMOX1, PYDC1, SIRT1	895	59	13528	2.305690748982104	1.0	0.7217447801747219	51.53893542010488
GOTERM_BP_FAT	GO:0042278~purine nucleoside metabolic process	6	0.4705882352941176	0.0393983284993247	PANK1, ADK, QTRT1, PPCDC, DCAKD, APRT	895	29	13528	3.1272587170102097	1.0	0.7195141072192446	51.67560302809857
GOTERM_BP_FAT	GO:0046128~purine ribonucleoside metabolic process	6	0.4705882352941176	0.0393983284993247	PANK1, ADK, QTRT1, PPCDC, DCAKD, APRT	895	29	13528	3.1272587170102097	1.0	0.7195141072192446	51.67560302809857
GOTERM_BP_FAT	GO:0043388~positive regulation of DNA binding	10	0.7843137254901961	0.04018294980816324	ICAM1, HDAC4, MTDH, RELA, AGT, NPM1, SKI, IRF4, CALM1, RHEBL1	895	70	13528	2.159297685554669	1.0	0.7231014398812518	52.384774658761245
GOTERM_BP_FAT	GO:0045637~regulation of myeloid cell differentiation	10	0.7843137254901961	0.04018294980816324	LEP, ESRRA, ID2, ETS1, LDB1, KLF10, MITF, INHA, ACIN1, TOB2	895	70	13528	2.159297685554669	1.0	0.7231014398812518	52.384774658761245
GOTERM_BP_FAT	GO:0042147~retrograde transport, endosome to Golgi	4	0.3137254901960784	0.04037941097787523	PIKFYVE, VPS35, YKT6, VPS26A	895	12	13528	5.038361266294227	1.0	0.7213325280153189	52.56079855872231
GOTERM_BP_FAT	GO:0007242~intracellular signaling cascade	99	7.764705882352942	0.04353223645236427	THRA, PRKAR2B, S1PR1, MC1R, S1PR4, RAPGEF6, PRKACB, HTR1D, GNG5, RAB21, GNG7, GNB1L, DFFA, DEPDC1, GEM, SOCS5, MAPK1, SPAG9, MAPK3, RAB17, ASB2, DCBLD2, RAB7A, MYO9B, CHEK2, AKAP11, ARFGEF2, CALR, SRC, RRAGC, DUSP16, RHEBL1, DVL2, ABR, VAV3, KLF9, MAP2K2, SMAD7, MET, BRCA2, KAT5, ATM, TRAF3IP2, P2RX7, PLCG1, BBC3, RIT1, TRIP6, PLA2G4C, ASIP, RAB5B, ARHGAP4, EDNRB, HMOX1, RAB6B, CSK, ARL2, ARHGEF3…	895	1256	13528	1.1913959363768991	1.0	0.7449324810650377	55.30290517577596
GOTERM_BP_FAT	GO:0016481~negative regulation of transcription	41	3.215686274509804	0.04381720121165866	SBNO2, THRA, MTDH, E2F6, CALR, TCEAL1, CBFA2T2, EPC1, SORBS3, PBXIP1, HEXIM1, HINFP, BCL6, BHLHE40, BCOR, ALX1, ETV3, NFX1, KHDRBS1, SMAD7, ARID5B, LDB1, KLF10, MECP2, ZNF24, ILF3, SKI, KAT5, SIRT1, GZF1, HES1, CTNNBIP1, HDAC4, DLX2, PA2G4, HILS1, ID2, TIMELESS, ID1, MLX, YWHAQ	895	459	13528	1.3501490975036818	1.0	0.7438573156918616	55.54322618300691
GOTERM_BP_FAT	GO:0045934~negative regulation of nucleobase, nucleoside, nucleotide and nucleic acid metabolic process	45	3.5294117647058822	0.0444928058429129	SBNO2, THRA, MTDH, E2F6, CALR, TCEAL1, CBFA2T2, EPC1, SORBS3, PBXIP1, HEXIM1, NPM1, HINFP, BCL6, BHLHE40, BCOR, ALX1, ETV3, NFX1, KHDRBS1, NF2, SMAD7, ARID5B, LDB1, GMNN, KLF10, MECP2, ZNF24, BRCA2, ILF3, SKI, KAT5, SIRT1, GZF1, HES1, CTNNBIP1, HDAC4, DLX2, PA2G4, HILS1, ID2, TIMELESS, ID1, MLX, YWHAQ	895	512	13528	1.328474162011173	1.0	0.745944735087128	56.10811926870278
GOTERM_BP_FAT	GO:0032268~regulation of cellular protein metabolic process	42	3.294117647058824	0.04566002033735126	MASP1, GIPC1, CDC16, ANAPC11, FEM1B, CALR, PSMB4, PRKAR2B, EDNRB, FNTA, SET, EIF3B, AGT, PSMB2, EIF3K, EIF1, MLST8, TAF1, CLN3, ANAPC5, NF2, SMAD7, BIRC7, TNFRSF14, CDK4, PRKCE, EIF4G1, CCNB1, HDAC4, MAPK1, PA2G4, CARD14, P2RX7, EIF4E, BAX, EIF4H, PSEN2, CD81, HSPB1, CLN8, PPP1R15A, CLN6	895	474	13528	1.339311222685807	1.0	0.7518202712868718	57.06811673805519
GOTERM_BP_FAT	GO:0000086~G2/M transition of mitotic cell cycle	5	0.39215686274509803	0.04605894174252001	KHDRBS1, CCNB1, TAF1, ANAPC5, GADD45A	895	21	13528	3.598829475924448	1.0	0.7516222419770098	57.39164369364826
GOTERM_BP_FAT	GO:0048169~regulation of long-term neuronal synaptic plasticity	5	0.39215686274509803	0.04605894174252001	NRAS, GRIK2, AGT, RAB5A, NPTN	895	21	13528	3.598829475924448	1.0	0.7516222419770098	57.39164369364826
GOTERM_BP_FAT	GO:0009394~2'-deoxyribonucleotide metabolic process	5	0.39215686274509803	0.04605894174252001	NUDT1, NT5M, ADK, DTYMK, TDG	895	21	13528	3.598829475924448	1.0	0.7516222419770098	57.39164369364826
GOTERM_BP_FAT	GO:0048284~organelle fusion	5	0.39215686274509803	0.04605894174252001	CLN3, P2RX7, VAV3, BAX, USO1	895	21	13528	3.598829475924448	1.0	0.7516222419770098	57.39164369364826
GOTERM_BP_FAT	GO:0015837~amine transport	14	1.0980392156862746	0.04767889934608113	ARL2, SLC36A1, CLN3, SLC38A7, SLC6A4, SLC6A15, SLC19A1, SLC7A7, SLC1A4, SLC25A13, SLC7A1, SLC25A26, CLN8, SLC43A1	895	118	13528	1.7933150269860811	1.0	0.760576485639355	58.681920102087425
GOTERM_BP_FAT	GO:0050953~sensory perception of light stimulus	22	1.7254901960784312	0.048669156148578155	SLC45A2, OPA3, BBS5, CRYAA, BBS9, HPS1, PRPF3, PPT1, GPR143, ABCA4, RGS9BP, PROM1, TYR, CRYGC, BEST1, PRCD, ATXN7, TGFBI, CHM, CLN8, SEMA4A, CLN6	895	216	13528	1.5394992758121249	1.0	0.7645946203740076	59.45237387116489
GOTERM_BP_FAT	GO:0007601~visual perception	22	1.7254901960784312	0.048669156148578155	SLC45A2, OPA3, BBS5, CRYAA, BBS9, HPS1, PRPF3, PPT1, GPR143, ABCA4, RGS9BP, PROM1, TYR, CRYGC, BEST1, PRCD, ATXN7, TGFBI, CHM, CLN8, SEMA4A, CLN6	895	216	13528	1.5394992758121249	1.0	0.7645946203740076	59.45237387116489
GOTERM_BP_FAT	GO:0006664~glycolipid metabolic process	6	0.4705882352941176	0.050625955291524256	CLN3, PSAP, HEXA, CREM, BAX, CLN6	895	31	13528	2.9255000901063255	1.0	0.7751498537024635	60.93509672139701
GOTERM_BP_FAT	GO:0002761~regulation of myeloid leukocyte differentiation	7	0.5490196078431373	0.05090323398973575	ESRRA, ID2, KLF10, MITF, INHA, ACIN1, TOB2	895	41	13528	2.5806240632238726	1.0	0.7739658079189102	61.141007603338835
GOTERM_BP_FAT	GO:0051301~cell division	28	2.196078431372549	0.0534144110153981	LZTS2, HAUS5, USP9X, NEDD9, ANAPC11, CDC16, KIAA1009, EVI5, CLASP2, CABLES1, BOD1, ANAPC5, LIG1, PAPD7, TREX2, BRCA2, CDK7, CEP63, CDK4, TACC1, SMC3, CCNB1, TIMELESS, CKS2, PDCD6IP, CIT, CHFR, CDK20	895	295	13528	1.4346520215888647	1.0	0.7874128390573985	62.959718064877656
GOTERM_BP_FAT	GO:0042176~regulation of protein catabolic process	8	0.6274509803921569	0.053727770430575895	XPO1, TAF1, SMAD7, RELA, TRIM32, GIPC1, FAF1, NEDD4L	895	52	13528	2.3253975075204125	1.0	0.7864392837212991	63.180938869987735
GOTERM_BP_FAT	GO:0010558~negative regulation of macromolecule biosynthetic process	47	3.686274509803922	0.054922614510434356	SBNO2, THRA, MTDH, E2F6, CALR, TCEAL1, CBFA2T2, EPC1, SORBS3, FNTA, PBXIP1, HEXIM1, HINFP, BCL6, BHLHE40, BCOR, LAG3, ALX1, ETV3, NFX1, KHDRBS1, NF2, SMAD7, ARID5B, LDB1, GMNN, KLF10, MECP2, ZNF24, BRCA2, ILF3, SKI, INHA, KAT5, SIRT1, GZF1, HES1, CTNNBIP1, HDAC4, DLX2, PA2G4, HILS1, ID2, TIMELESS, ID1, MLX, YWHAQ	895	547	13528	1.298736633542022	1.0	0.7909497030399955	64.01305670955816
GOTERM_BP_FAT	GO:0022403~cell cycle phase	37	2.9019607843137254	0.05513266392472842	LZTS2, HAUS5, CEP120, E2F6, USP9X, NEDD9, ANAPC11, CDC16, KIAA1009, CUL5, MC1R, HINFP, CLASP2, KHDRBS1, TAF1, BOD1, CRYAA, ANAPC5, TREX2, PAPD7, BRCA2, ILF3, CEP63, CDK4, SMC3, ATM, EML4, CCNB1, CUL4A, TIMELESS, FANCD2, POLD1, CKS2, CHFR, CIT, MPHOSPH6, GADD45A	895	414	13528	1.350864977194829	1.0	0.7893496600176506	64.15749136516725
GOTERM_BP_FAT	GO:0051272~positive regulation of cell motion	12	0.9411764705882352	0.058271525013695494	ICAM1, SPAG9, MAPK1, PRR5, IRS2, S1PR1, ETS1, PTP4A1, AGT, BCL6, SCARB1, TRIP6	895	98	13528	1.8508265876182874	1.0	0.8049711297755877	66.25166016787159
GOTERM_BP_FAT	GO:0016192~vesicle-mediated transport	49	3.8431372549019605	0.058430946259821925	SEC24B, AP1G1, TRAPPC2L, VPS33A, PICALM, PACSIN2, ZFYVE16, RAB6B, GOLGA4, CLN3, STX4, SYNRG, NCALD, ATP6V1H, VPS41, WAS, ELMO2, FNBP1L, USO1, RAB5A, TOM1, VPS26A, SNAP29, RAB7A, STX7, PPT1, NAPA, SNX3, ARFGEF2, SRC, FTH1, WDR19, SQSTM1, OSBPL1A, PIKFYVE, SCARB1, SEC22C, VPS35, EXOC2, VAV3, HCK, NLGN1, WIPI1, NRAS, P2RX7, SYTL2, LRP8, YKT6, GGA2	895	576	13528	1.2858317815021725	1.0	0.8031052342785485	66.35487492093506
GOTERM_BP_FAT	GO:0009968~negative regulation of signal transduction	22	1.7254901960784312	0.059348998443697176	NF2, PTPRF, SMAD7, RELA, FSTL3, SKI, SOCS5, CALR, SIRT1, RGS9BP, CTNNBIP1, RGS20, P2RX7, GRB10, AKT1S1, RGS12, ATXN7, AGT, ZFYVE28, OTUD7B, BCL6, PTPN1	895	221	13528	1.5046689754543845	1.0	0.805495753818563	66.94347374045184
GOTERM_BP_FAT	GO:0022402~cell cycle process	48	3.7647058823529407	0.06094621521458872	GAS2L3, LZTS2, HAUS5, CEP120, E2F6, USP9X, NEDD9, CDC16, ANAPC11, CALR, KIAA1009, PSMB4, CUL5, CEP250, MC1R, NPM1, PSMB2, HINFP, CLASP2, KHDRBS1, TAF1, BOD1, CRYAA, ANAPC5, WDR6, TREX2, PAPD7, BRCA2, ILF3, INHA, CEP63, CDK4, SMC3, ATM, EML4, CCNB1, PA2G4, TIMELESS, CUL4A, FANCD2, POLD1, CKS2, CHFR, CIT, MPHOSPH6, PPP1R15A, GADD45A, ARAP1	895	565	13528	1.2841133138873781	1.0	0.8114738321858381	67.94439312031014
GOTERM_BP_FAT	GO:0033059~cellular pigmentation	5	0.39215686274509803	0.06145585614093484	BBS5, MLPH, ARL6, ASIP, VPS33A	895	23	13528	3.2858877823658004	1.0	0.8115232406652263	68.25769410287839
GOTERM_BP_FAT	GO:0006921~cell structure disassembly during apoptosis	5	0.39215686274509803	0.06145585614093484	DFFA, BAX, CYCS, BIRC7, PPT1	895	23	13528	3.2858877823658004	1.0	0.8115232406652263	68.25769410287839
GOTERM_BP_FAT	GO:0042364~water-soluble vitamin biosynthetic process	5	0.39215686274509803	0.06145585614093484	NMNAT3, PDXK, AKR1A1, RFK, QPRT	895	23	13528	3.2858877823658004	1.0	0.8115232406652263	68.25769410287839
GOTERM_BP_FAT	GO:0000226~microtubule cytoskeleton organization	16	1.2549019607843137	0.06169184483977552	HAUS5, CEP120, CROCC, PSRC1, TREX2, BRCA2, CEP63, PCM1, UBE2B, GABARAP, SMC3, CEP250, MAP1S, NPM1, CKS2, GADD45A	895	147	13528	1.645179188994033	1.0	0.8101337521509313	68.40178583268901
GOTERM_BP_FAT	GO:0044242~cellular lipid catabolic process	10	0.7843137254901961	0.06232820812286076	LEP, ACOX1, PLCG1, SMPDL3A, HEXA, HAO2, SMPD1, PPT1, PLA2G4C, CPT1A	895	76	13528	1.9888268156424582	1.0	0.8108584676461974	68.78726764493007
GOTERM_BP_FAT	GO:0010648~negative regulation of cell communication	24	1.8823529411764703	0.06266307220933398	CLN3, NF2, PTPRF, SMAD7, GRIK2, RELA, FSTL3, SKI, SOCS5, CALR, SIRT1, RGS9BP, CTNNBIP1, RGS20, GRB10, P2RX7, AKT1S1, RGS12, ATXN7, AGT, ZFYVE28, OTUD7B, BCL6, PTPN1	895	248	13528	1.4627500450531628	1.0	0.8100086705216879	68.98832575962751
GOTERM_BP_FAT	GO:0006091~generation of precursor metabolites and energy	29	2.2745098039215685	0.06294079428102249	UQCRC2, ALDOA, ACOX1, ATP6V0E1, GNPDA1, OGDHL, VGF, OGDH, ATP6V0B, ATP6V0C, NDUFS6, CYBASC3, ATP6V0D1, LDHAL6B, SUCLG2, NDUFA6, CYCS, FDXR, ATP6V1H, GYG2, GYG1, LEP, ATP6V1A, SDHB, GBE1, SLC25A13, FDX1L, TXNRD1, ASIP	895	313	13528	1.4004390740178843	1.0	0.8088731269911471	69.15414602632791
GOTERM_BP_FAT	GO:0007569~cell aging	6	0.4705882352941176	0.06354114420252349	NRAS, LIMS1, NPM1, MNT, BRCA2, SIRT1	895	33	13528	2.7481970543423055	1.0	0.8094145683625646	69.50974053409308
GOTERM_BP_FAT	GO:0055085~transmembrane transport	48	3.7647058823529407	0.0677910431608057	GRPEL2, ATP6V0E1, SLC22A18, MFSD8, KCNAB2, SLC37A3, TIMM50, NUP188, TIMM13, SLC19A1, SLC26A1, SLC19A2, SLC26A2, ATP6V0B, AQP2, ATP6V0C, KCNS3, SLC11A2, SLC2A8, SLC16A1, SLC23A3, MTCH2, SLC35B2, SLC23A2, MTCH1, SLC25A46, SLC25A44, SLC30A2, SCARB1, MCOLN1, SLC25A26, ATP6V0D1, SLC39A1, SLC12A6, CELSR3, ATP6V1H, TCN2, ABCB6, TIMM8A, TRPM1, SLC25A30, ATP6V1A, SLC25A13, SLC16A7, SLC25A33, SLC25A36, SPN…	895	569	13528	1.2750861552660258	1.0	0.8276670104456291	71.91846880605377
GOTERM_BP_FAT	GO:0006289~nucleotide-excision repair	8	0.6274509803921569	0.06892680476228943	PNKP, SLK, POLD1, LIG1, POLD2, BRCA2, CDK7, GTF2H1	895	55	13528	2.1985576434738445	1.0	0.8304598201906144	72.53106707498245
GOTERM_BP_FAT	GO:0007010~cytoskeleton organization	38	2.980392156862745	0.07052124801418093	ALDOA, HAUS5, CEP120, SSH1, CROCC, CALD1, NEDD9, MYO9B, CALR, ARHGAP4, PRR5, CEP250, PACSIN2, NPM1, MICAL1, BCL6, PLS3, CAP2, CRYAA, NF2, PSRC1, TREX2, BRCA2, CEP63, PCM1, CAPN3, UBE2B, WAS, GABARAP, SMC3, NRAS, MAST1, MAP1S, CKS2, GADD45A, CLN8, ARAP1, PARVA	895	436	13528	1.3173696888934445	1.0	0.835187440384086	73.3697928770021
GOTERM_BP_FAT	GO:0006885~regulation of pH	6	0.4705882352941176	0.07062970968221566	CLN3, EDNRB, ATP6V0E1, ATP6V1H, PPT1, CLN6	895	34	13528	2.667367729214591	1.0	0.8333259996653424	73.42595911986547
GOTERM_BP_FAT	GO:0000278~mitotic cell cycle	33	2.588235294117647	0.07193185456409211	LZTS2, HAUS5, E2F6, USP9X, NEDD9, ANAPC11, CDC16, KIAA1009, PSMB4, CUL5, CEP250, MC1R, PSMB2, HINFP, CLASP2, KHDRBS1, TAF1, BOD1, ANAPC5, PAPD7, TREX2, CEP63, CDK4, SMC3, EML4, CCNB1, CUL4A, TIMELESS, POLD1, CHFR, MPHOSPH6, CIT, GADD45A	895	370	13528	1.348102068548996	1.0	0.8366494377540924	74.09158905818742
GOTERM_BP_FAT	GO:0046627~negative regulation of insulin receptor signaling pathway	4	0.3137254901960784	0.07213688143503648	GRB10, PTPRF, RELA, PTPN1	895	15	13528	4.030689013035381	1.0	0.8352359206449981	74.19494822657565
GOTERM_BP_FAT	GO:0046513~ceramide biosynthetic process	4	0.3137254901960784	0.07213688143503648	P2RX7, SMPD1, SGMS1, CLN8	895	15	13528	4.030689013035381	1.0	0.8352359206449981	74.19494822657565
GOTERM_BP_FAT	GO:0051726~regulation of cell cycle	30	2.3529411764705883	0.07296207148452921	XPO1, CDK5R1, CHEK2, CDC16, CALR, FNTA, HEXIM1, NPM1, HINFP, BCL6, CABLES1, SERTAD1, GMNN, BRCA2, CDK7, INHA, CEP63, CDK4, ATM, GTF2H1, CCNB1, MAD2L1BP, ID2, TIMELESS, ETS1, BAX, MNT, CKS2, CHFR, GADD45A	895	331	13528	1.3699471721041705	1.0	0.8364670740267357	74.60702127386523
GOTERM_BP_FAT	GO:0015937~coenzyme A biosynthetic process	3	0.2352941176470588	0.07336513477554134	PANK1, PPCDC, DCAKD	895	7	13528	6.477893056664006	1.0	0.8359097063905483	74.80603062533898
GOTERM_BP_FAT	GO:0043632~modification-dependent macromolecule catabolic process	48	3.7647058823529407	0.07548360265275522	USP9X, SAE1, UBE2V2, ANAPC11, CDC16, FEM1B, DERL3, SUMO3, PSMB4, UBE2D4, CUL5, SQSTM1, WWP2, CACYBP, PSMB2, OTUD7B, KLHL21, RBCK1, FBXO44, NSMCE2, USP36, NEDD4L, USP15, USP32, FBXL17, USP31, NFX1, RNF144A, ANAPC5, UBE4B, FOXRED2, MARCH8, SOCS5, TRIM63, UBE2Q1, UBE2B, UBL5, CCNB1, URM1, CUL4A, ATG4B, TRIM32, KLHL12, ASB2, USP48, FAF1, CHFR, FBXL2	895	574	13528	1.263979133007611	1.0	0.8423899221840637	75.82801144995965
GOTERM_BP_FAT	GO:0019941~modification-dependent protein catabolic process	48	3.7647058823529407	0.07548360265275522	USP9X, SAE1, UBE2V2, ANAPC11, CDC16, FEM1B, DERL3, SUMO3, PSMB4, UBE2D4, CUL5, SQSTM1, WWP2, CACYBP, PSMB2, OTUD7B, KLHL21, RBCK1, FBXO44, NSMCE2, USP36, NEDD4L, USP15, USP32, FBXL17, USP31, NFX1, RNF144A, ANAPC5, UBE4B, FOXRED2, MARCH8, SOCS5, TRIM63, UBE2Q1, UBE2B, UBL5, CCNB1, URM1, CUL4A, ATG4B, TRIM32, KLHL12, ASB2, USP48, FAF1, CHFR, FBXL2	895	574	13528	1.263979133007611	1.0	0.8423899221840637	75.82801144995965
GOTERM_BP_FAT	GO:0030003~cellular cation homeostasis	24	1.8823529411764703	0.07715569698951377	CLN3, ATP6V0E1, GRIK2, MFI2, ATP6V1H, PPT1, NPY1R, CALR, CSRP3, ABCB6, FTH1, EDNRB, CUL5, P2RX7, S1PR1, ADM, CCR4, AGT, BAX, S1PR4, NEDD4L, ASNA1, SCO2, CLN6	895	254	13528	1.4281968943826155	1.0	0.8468198554200951	76.60686547312308
GOTERM_BP_FAT	GO:0006040~amino sugar metabolic process	5	0.39215686274509803	0.07922413274081125	GNPDA1, FN3K, NAGK, EXTL2, NANP	895	25	13528	3.0230167597765365	1.0	0.8525527548643022	77.53754565754338
GOTERM_BP_FAT	GO:0048285~organelle fission	22	1.7254901960784312	0.07967499093176172	BOD1, LZTS2, HAUS5, ANAPC5, USP9X, PAPD7, TREX2, NEDD9, CDC16, ANAPC11, CEP63, SMC3, EML4, KIAA1009, CCNB1, FIS1, TIMELESS, MC1R, BAX, CLASP2, CHFR, CIT	895	229	13528	1.452104120416677	1.0	0.8521393085666106	77.73570926901118
GOTERM_BP_FAT	GO:0006511~ubiquitin-dependent protein catabolic process	23	1.803921568627451	0.07979792637287222	ANAPC5, USP9X, FOXRED2, UBE4B, CDC16, ANAPC11, TRIM63, DERL3, UBE2B, CCNB1, PSMB4, CUL5, CUL4A, SQSTM1, TRIM32, PSMB2, USP36, FAF1, USP48, CHFR, USP15, USP32, USP31	895	242	13528	1.436557551133478	1.0	0.8505188952047169	77.78945526296317
GOTERM_BP_FAT	GO:0009119~ribonucleoside metabolic process	7	0.5490196078431373	0.08066050251507634	PANK1, ADK, UPP1, QTRT1, PPCDC, DCAKD, APRT	895	46	13528	2.3001214476560605	1.0	0.8516365818891802	78.16313102555922
GOTERM_BP_FAT	GO:0006825~copper ion transport	4	0.3137254901960784	0.08458800947360598	SLC11A2, SLC31A2, SLC31A1, SCO2	895	16	13528	3.77877094972067	1.0	0.8634137637030842	79.79072674110597
GOTERM_BP_FAT	GO:0046520~sphingoid biosynthetic process	4	0.3137254901960784	0.08458800947360598	P2RX7, SMPD1, SGMS1, CLN8	895	16	13528	3.77877094972067	1.0	0.8634137637030842	79.79072674110597
GOTERM_BP_FAT	GO:0030099~myeloid cell differentiation	11	0.8627450980392156	0.08639147324080142	PKNOX1, ID2, HOXB7, PSEN2, NCOA6, BCL6, IRF4, INHA, ACIN1, OSTM1, VPS33A	895	93	13528	1.787805610620532	1.0	0.8674350678593427	80.49906732302033
GOTERM_BP_FAT	GO:0032483~regulation of Rab protein signal transduction	7	0.5490196078431373	0.08756934865008928	TBC1D17, EVI5, TBC1D14, TBC1D13, TBC1D5, TBC1D20, TBC1D2	895	47	13528	2.251182693450612	1.0	0.869319372300505	80.94896446179709
GOTERM_BP_FAT	GO:0032313~regulation of Rab GTPase activity	7	0.5490196078431373	0.08756934865008928	TBC1D17, EVI5, TBC1D14, TBC1D13, TBC1D5, TBC1D20, TBC1D2	895	47	13528	2.251182693450612	1.0	0.869319372300505	80.94896446179709
GOTERM_BP_FAT	GO:0000737~DNA catabolic process, endonucleolytic	5	0.39215686274509803	0.08896236485342017	DFFA, BAX, CYCS, BIRC7, PPT1	895	26	13528	2.9067468844005155	1.0	0.8718247094929176	81.46837997464411
GOTERM_BP_FAT	GO:0010551~regulation of specific transcription from RNA polymerase II promoter	11	0.8627450980392156	0.0912731069039154	HES1, HDAC4, DLX2, TAF1, THRA, ETS1, SMAD7, IRF4, BCOR, KAT5, SIRT1	895	94	13528	1.7687864019969093	1.0	0.8770030013777435	82.30059920563531
GOTERM_BP_FAT	GO:0055080~cation homeostasis	26	2.03921568627451	0.0930992769646638	ATP6V0E1, GRIK2, PPT1, CALR, FTH1, SLC11A2, EDNRB, CUL5, S1PR1, HMOX1, AGT, S1PR4, NEDD4L, SCO2, CLN3, MFI2, ATP6V1H, NPY1R, ABCB6, CSRP3, P2RX7, ADM, CCR4, BAX, ASNA1, CLN6	895	286	13528	1.374098527171153	1.0	0.8805408979049099	82.93318743851104
GOTERM_BP_FAT	GO:0042455~ribonucleoside biosynthetic process	3	0.2352941176470588	0.09364414977137628	ADK, QTRT1, APRT	895	8	13528	5.668156424581005	1.0	0.8803404609342532	83.11775543276958
GOTERM_BP_FAT	GO:0042451~purine nucleoside biosynthetic process	3	0.2352941176470588	0.09364414977137628	ADK, QTRT1, APRT	895	8	13528	5.668156424581005	1.0	0.8803404609342532	83.11775543276958
GOTERM_BP_FAT	GO:0009163~nucleoside biosynthetic process	3	0.2352941176470588	0.09364414977137628	ADK, QTRT1, APRT	895	8	13528	5.668156424581005	1.0	0.8803404609342532	83.11775543276958
GOTERM_BP_FAT	GO:0046129~purine ribonucleoside biosynthetic process	3	0.2352941176470588	0.09364414977137628	ADK, QTRT1, APRT	895	8	13528	5.668156424581005	1.0	0.8803404609342532	83.11775543276958
GOTERM_BP_FAT	GO:0043066~negative regulation of apoptosis	31	2.431372549019608	0.09394264342653065	GRIK2, MITF, PPT1, SGMS1, EDNRB, FNTA, AKT1S1, SQSTM1, HMOX1, AGT, NPM1, DAD1, BCL6, TERT, CLN3, CRYAA, DFFA, RELA, BCL2A1, BIRC7, ANXA5, ATM, NRAS, BAX, BNIP3L, PSEN2, HSPB1, CFDP1, MYO18A, CLN8, IFI6	895	354	13528	1.3236372818230597	1.0	0.879442290649191	83.21806485044054
GOTERM_BP_FAT	GO:0009451~RNA modification	7	0.5490196078431373	0.09479141015702833	URM1, RPUSD4, QTRT1, TFB1M, TRUB2, NOP10, ADAR	895	48	13528	2.2042830540037244	1.0	0.8801119162596825	83.5002267893231
GOTERM_BP_FAT	GO:0000041~transition metal ion transport	9	0.7058823529411765	0.09545028365321802	SLC11A2, MFI2, SLC30A2, SLC31A2, TCN2, SLC31A1, FTH1, SCO2, SLC39A1	895	71	13528	1.9159965378865371	1.0	0.8802403154778822	83.71616476209743
GOTERM_BP_FAT	GO:0044093~positive regulation of molecular function	48	3.7647058823529407	0.09767969868730256	SIVA1, AVPR2, MTDH, APH1A, CALD1, DPH3, ANAPC11, CDC16, SDC4, SLC11A2, PSMB4, PRKAR2B, EDNRB, FNTA, S1PR1, S1PR4, AGT, NPM1, PSMB2, MTCH1, SCARB1, PRKACB, RHEBL1, ICAM1, CAP2, VAV3, ANAPC5, RELA, MET, CYCS, BIRC7, SKI, CARD10, CCNB1, HDAC4, GNAL, SPAG9, CARD14, P2RX7, SYDE2, BBC3, BAX, PSEN2, CD81, LRP8, IRF4, ARAP1, CALM1	895	586	13528	1.2380956012736668	1.0	0.8846610171117438	84.42719671338523
GOTERM_BP_FAT	GO:0046488~phosphatidylinositol metabolic process	4	0.3137254901960784	0.09787953336732437	PIKFYVE, CD81, PIP5K1A, PIP4K2C	895	17	13528	3.5564903056194543	1.0	0.8835279429930526	84.48947722930848
GOTERM_BP_FAT	GO:0030149~sphingolipid catabolic process	4	0.3137254901960784	0.09787953336732437	SMPDL3A, HEXA, SMPD1, PPT1	895	17	13528	3.5564903056194543	1.0	0.8835279429930526	84.48947722930848
GOTERM_BP_FAT	GO:0046466~membrane lipid catabolic process	4	0.3137254901960784	0.09787953336732437	SMPDL3A, HEXA, SMPD1, PPT1	895	17	13528	3.5564903056194543	1.0	0.8835279429930526	84.48947722930848
GOTERM_BP_FAT	GO:0018205~peptidyl-lysine modification	4	0.3137254901960784	0.09787953336732437	HDAC4, DOHH, DHPS, SIRT1	895	17	13528	3.5564903056194543	1.0	0.8835279429930526	84.48947722930848
GOTERM_BP_FAT	GO:0008283~cell proliferation	37	2.9019607843137254	0.09885023872645704	TSPO, CDK5R1, CEP120, DTYMK, UBE2V2, CDC16, FTH1, SRC, SHB, CUL5, SLC29A2, EVI5, HMOX1, AGT, TGFBI, GBX2, SCARB1, KHDRBS1, IRS2, PDXK, NF2, TAF8, KLF10, MET, BRCA2, CDK7, APPL2, CTNNBIP1, EPS15, PA2G4, P2RX7, BAX, GOLPH3, CD81, CKS2, PTCH1, TXNRD1	895	436	13528	1.2827020655015118	1.0	0.88446575681249	84.78867429954022
GOTERM_BP_FAT	GO:0009262~deoxyribonucleotide metabolic process	5	0.39215686274509803	0.09924516730095824	NUDT1, NT5M, ADK, DTYMK, TDG	895	27	13528	2.7990895923856822	1.0	0.8838669837268825	84.9088342942465
GOTERM_BP_FAT	GO:0009890~negative regulation of biosynthetic process	47	3.686274509803922	0.09931023397787772	SBNO2, THRA, MTDH, E2F6, CALR, TCEAL1, CBFA2T2, EPC1, SORBS3, FNTA, PBXIP1, HEXIM1, HINFP, BCL6, BHLHE40, BCOR, LAG3, ALX1, ETV3, NFX1, KHDRBS1, NF2, SMAD7, ARID5B, LDB1, GMNN, KLF10, MECP2, ZNF24, BRCA2, ILF3, SKI, INHA, KAT5, SIRT1, GZF1, HES1, CTNNBIP1, HDAC4, DLX2, PA2G4, HILS1, ID2, TIMELESS, ID1, MLX, YWHAQ	895	573	13528	1.239806175475543	1.0	0.8823951875164309	84.92854507352841

## Sheet: MAREs_AnnotGenes-List
Ensembl gene id	Gene Name	Gene Description
ENSG00000002726	AOC1	amine oxidase, copper containing 1
ENSG00000002834	LASP1	LIM and SH3 protein 1
ENSG00000003989	SLC7A2	solute carrier family 7 (cationic amino acid transporter, y+ system), member 2
ENSG00000004455	AK2	adenylate kinase 2
ENSG00000004809	SLC22A16	solute carrier family 22 (organic cation/carnitine transporter), member 16
ENSG00000004864	SLC25A13	solute carrier family 25 (aspartate/glutamate carrier), member 13
ENSG00000005700	IBTK	inhibitor of Bruton agammaglobulinemia tyrosine kinase
ENSG00000006468	ETV1	ets variant 1
ENSG00000006607	FARP2	FERM, RhoGEF and pleckstrin domain protein 2
ENSG00000007062	PROM1	prominin 1
ENSG00000007237	GAS7	growth arrest-specific 7
ENSG00000007944	MYLIP	myosin regulatory light chain interacting protein
ENSG00000008083	JARID2	jumonji, AT rich interactive domain 2
ENSG00000008256	CYTH3	cytohesin 3
ENSG00000008283	CYB561	cytochrome b561
ENSG00000009830	POMT2	protein-O-mannosyltransferase 2
ENSG00000010017	RANBP9	RAN binding protein 9
ENSG00000010278	CD9	CD9 molecule
ENSG00000010810	FYN	FYN oncogene related to SRC, FGR, YES
ENSG00000010818	HIVEP2	human immunodeficiency virus type I enhancer binding protein 2
ENSG00000011052	NME1-NME2	NME1-NME2 readthrough
ENSG00000011523	CEP68	centrosomal protein 68kDa
ENSG00000012048	BRCA1	breast cancer 1, early onset
ENSG00000012232	EXTL3	exostosin-like glycosyltransferase 3
ENSG00000012660	ELOVL5	ELOVL fatty acid elongase 5
ENSG00000012817	KDM5D	lysine (K)-specific demethylase 5D
ENSG00000014914	MTMR11	myotubularin related protein 11
ENSG00000015171	ZMYND11	zinc finger, MYND-type containing 11
ENSG00000018408	WWTR1	WW domain containing transcription regulator 1
ENSG00000019549	SNAI2	snail family zinc finger 2
ENSG00000020577	SAMD4A	sterile alpha motif domain containing 4A
ENSG00000021300	PLEKHB1	pleckstrin homology domain containing, family B (evectins) member 1
ENSG00000025796	SEC63	SEC63 homolog (S. cerevisiae)
ENSG00000026508	CD44	CD44 molecule (Indian blood group)
ENSG00000026652	AGPAT4	1-acylglycerol-3-phosphate O-acyltransferase 4
ENSG00000028116	VRK2	vaccinia related kinase 2
ENSG00000031081	ARHGAP31	Rho GTPase activating protein 31
ENSG00000032742	IFT88	intraflagellar transport 88 homolog (Chlamydomonas)
ENSG00000033327	GAB2	GRB2-associated binding protein 2
ENSG00000033867	SLC4A7	solute carrier family 4, sodium bicarbonate cotransporter, member 7
ENSG00000034239	EFCAB1	EF-hand calcium binding domain 1
ENSG00000035681	NSMAF	neutral sphingomyelinase (N-SMase) activation associated factor
ENSG00000036549	ZZZ3	zinc finger, ZZ-type containing 3
ENSG00000038382	TRIO	trio Rho guanine nucleotide exchange factor
ENSG00000039068	CDH1	cadherin 1, type 1, E-cadherin (epithelial)
ENSG00000039319	ZFYVE16	zinc finger, FYVE domain containing 16
ENSG00000041515	MYO16	myosin XVI
ENSG00000042781	USH2A	Usher syndrome 2A (autosomal recessive, mild)
ENSG00000046653	GPM6B	glycoprotein M6B
ENSG00000047578	KIAA0556	KIAA0556
ENSG00000047579	DTNBP1	dystrobrevin binding protein 1
ENSG00000047849	MAP4	microtubule-associated protein 4
ENSG00000048342	CC2D2A	coiled-coil and C2 domain containing 2A
ENSG00000048740	CELF2	CUGBP, Elav-like family member 2
ENSG00000049759	NEDD4L	neural precursor cell expressed, developmentally down-regulated 4-like, E3 ubiquitin protein ligase
ENSG00000050165	DKK3	dickkopf WNT signaling pathway inhibitor 3
ENSG00000052126	PLEKHA5	pleckstrin homology domain containing, family A member 5
ENSG00000053254	FOXN3	forkhead box N3
ENSG00000054598	FOXC1	forkhead box C1
ENSG00000054611	TBC1D22A	TBC1 domain family, member 22A
ENSG00000054654	SYNE2	spectrin repeat containing, nuclear envelope 2
ENSG00000054690	PLEKHH1	pleckstrin homology domain containing, family H (with MyTH4 domain) member 1
ENSG00000054803	CBLN4	cerebellin 4 precursor
ENSG00000054983	GALC	galactosylceramidase
ENSG00000055917	PUM2	pumilio RNA-binding family member 2
ENSG00000056972	TRAF3IP2	TRAF3 interacting protein 2
ENSG00000056998	GYG2	glycogenin 2
ENSG00000058453	CROCC	ciliary rootlet coiled-coil, rootletin
ENSG00000062194	GPBP1	GC-rich promoter binding protein 1
ENSG00000062725	APPBP2	amyloid beta precursor protein (cytoplasmic tail) binding protein 2
ENSG00000063169	GLTSCR1	glioma tumor suppressor candidate region gene 1
ENSG00000064102	ASUN	asunder spermatogenesis regulator
ENSG00000064225	ST3GAL6	ST3 beta-galactoside alpha-2,3-sialyltransferase 6
ENSG00000064763	FAR2	fatty acyl CoA reductase 2
ENSG00000064787	BCAS1	breast carcinoma amplified sequence 1
ENSG00000064886	CHI3L2	chitinase 3-like 2
ENSG00000064999	ANKS1A	ankyrin repeat and sterile alpha motif domain containing 1A
ENSG00000065150	IPO5	importin 5
ENSG00000065361	ERBB3	v-erb-b2 avian erythroblastic leukemia viral oncogene homolog 3
ENSG00000065371	ROPN1	rhophilin associated tail protein 1
ENSG00000065518	NDUFB4	NADH dehydrogenase (ubiquinone) 1 beta subcomplex, 4, 15kDa
ENSG00000066027	PPP2R5A	protein phosphatase 2, regulatory subunit B', alpha
ENSG00000066651	TRMT11	tRNA methyltransferase 11 homolog (S. cerevisiae)
ENSG00000066827	ZFAT	zinc finger and AT hook domain containing
ENSG00000067248	DHX29	DEAH (Asp-Glu-Ala-His) box polypeptide 29
ENSG00000068305	MEF2A	myocyte enhancer factor 2A
ENSG00000068745	IP6K2	inositol hexakisphosphate kinase 2
ENSG00000069122	GPR116	G protein-coupled receptor 116
ENSG00000069424	KCNAB2	potassium voltage-gated channel, shaker-related subfamily, beta member 2
ENSG00000069702	TGFBR3	transforming growth factor, beta receptor III
ENSG00000069849	ATP1B3	ATPase, Na+/K+ transporting, beta 3 polypeptide
ENSG00000070087	PFN2	profilin 2
ENSG00000070731	ST6GALNAC2	ST6 (alpha-N-acetyl-neuraminyl-2,3-beta-galactosyl-1,3)-N-acetylgalactosaminide alpha-2,6-sialyltransferase 2
ENSG00000071054	MAP4K4	mitogen-activated protein kinase kinase kinase kinase 4
ENSG00000071127	WDR1	WD repeat domain 1
ENSG00000071242	RPS6KA2	ribosomal protein S6 kinase, 90kDa, polypeptide 2
ENSG00000071575	TRIB2	tribbles pseudokinase 2
ENSG00000071909	MYO3B	myosin IIIB
ENSG00000071991	CDH19	cadherin 19, type 2
ENSG00000072042	RDH11	retinol dehydrogenase 11 (all-trans/9-cis/11-cis)
ENSG00000072864	NDE1	nudE neurodevelopment protein 1
ENSG00000073060	SCARB1	scavenger receptor class B, member 1
ENSG00000073849	ST6GAL1	ST6 beta-galactosamide alpha-2,6-sialyltranferase 1
ENSG00000073921	PICALM	phosphatidylinositol binding clathrin assembly protein
ENSG00000075223	SEMA3C	sema domain, immunoglobulin domain (Ig), short basic domain, secreted, (semaphorin) 3C
ENSG00000075539	FRYL	FRY-like
ENSG00000075651	PLD1	phospholipase D1, phosphatidylcholine-specific
ENSG00000076053	RBM7	RNA binding motif protein 7
ENSG00000076554	TPD52	tumor protein D52
ENSG00000076604	TRAF4	TNF receptor-associated factor 4
ENSG00000076641	PAG1	phosphoprotein associated with glycosphingolipid microdomains 1
ENSG00000076864	RAP1GAP	RAP1 GTPase activating protein
ENSG00000077063	CTTNBP2	cortactin binding protein 2
ENSG00000077092	RARB	retinoic acid receptor, beta
ENSG00000077097	TOP2B	topoisomerase (DNA) II beta 180kDa
ENSG00000077458	FAM76B	family with sequence similarity 76, member B
ENSG00000077498	TYR	tyrosinase
ENSG00000078328	RBFOX1	RNA binding protein, fox-1 homolog (C. elegans) 1
ENSG00000079134	THOC1	THO complex 1
ENSG00000079246	XRCC5	X-ray repair complementing defective repair in Chinese hamster cells 5 (double-strand-break rejoining)
ENSG00000079459	FDFT1	farnesyl-diphosphate farnesyltransferase 1
ENSG00000079689	SCGN	secretagogin, EF-hand calcium binding protein
ENSG00000079739	PGM1	phosphoglucomutase 1
ENSG00000080166	DCT	dopachrome tautomerase
ENSG00000080608	KIAA0020	KIAA0020
ENSG00000080823	MOK	MOK protein kinase
ENSG00000080824	HSP90AA1	heat shock protein 90kDa alpha (cytosolic), class A member 1
ENSG00000081189	MEF2C	myocyte enhancer factor 2C
ENSG00000081913	PHLPP1	PH domain and leucine rich repeat protein phosphatase 1
ENSG00000082213	C5orf22	chromosome 5 open reading frame 22
ENSG00000082701	GSK3B	glycogen synthase kinase 3 beta
ENSG00000082805	ERC1	ELKS/RAB6-interacting/CAST family member 1
ENSG00000082996	RNF13	ring finger protein 13
ENSG00000083099	LYRM2	LYR motif containing 2
ENSG00000083123	BCKDHB	branched chain keto acid dehydrogenase E1, beta polypeptide
ENSG00000084112	SSH1	slingshot protein phosphatase 1
ENSG00000084731	KIF3C	kinesin family member 3C
ENSG00000085377	PREP	prolyl endopeptidase
ENSG00000085832	EPS15	epidermal growth factor receptor pathway substrate 15
ENSG00000085871	MGST2	microsomal glutathione S-transferase 2
ENSG00000086300	SNX10	sorting nexin 10
ENSG00000086570	FAT2	FAT atypical cadherin 2
ENSG00000087095	NLK	nemo-like kinase
ENSG00000087510	TFAP2C	transcription factor AP-2 gamma (activating enhancer binding protein 2 gamma)
ENSG00000088205	DDX18	DEAD (Asp-Glu-Ala-Asp) box polypeptide 18
ENSG00000088832	FKBP1A	FK506 binding protein 1A, 12kDa
ENSG00000088854	C20orf194	chromosome 20 open reading frame 194
ENSG00000088986	DYNLL1	dynein, light chain, LC8-type 1
ENSG00000089041	P2RX7	purinergic receptor P2X, ligand-gated ion channel, 7
ENSG00000089053	ANAPC5	anaphase promoting complex subunit 5
ENSG00000089057	SLC23A2	solute carrier family 23 (ascorbic acid transporter), member 2
ENSG00000091664	SLC17A6	solute carrier family 17 (vesicular glutamate transporter), member 6
ENSG00000091879	ANGPT2	angiopoietin 2
ENSG00000091972	CD200	CD200 molecule
ENSG00000092421	SEMA6A	sema domain, transmembrane domain (TM), and cytoplasmic domain, (semaphorin) 6A
ENSG00000092529	CAPN3	calpain 3, (p94)
ENSG00000093010	COMT	catechol-O-methyltransferase
ENSG00000093144	ECHDC1	enoyl CoA hydratase domain containing 1
ENSG00000093167	LRRFIP2	leucine rich repeat (in FLII) interacting protein 2
ENSG00000095209	TMEM38B	transmembrane protein 38B
ENSG00000095380	NANS	N-acetylneuraminic acid synthase
ENSG00000095637	SORBS1	sorbin and SH3 domain containing 1
ENSG00000097046	CDC7	cell division cycle 7
ENSG00000099260	PALMD	palmdelphin
ENSG00000099399	MAGEB2	melanoma antigen family B, 2
ENSG00000099725	PRKY	protein kinase, Y-linked, pseudogene
ENSG00000099917	MED15	mediator complex subunit 15
ENSG00000100030	MAPK1	mitogen-activated protein kinase 1
ENSG00000100225	FBXO7	F-box protein 7
ENSG00000100234	TIMP3	TIMP metallopeptidase inhibitor 3
ENSG00000100266	PACSIN2	protein kinase C and casein kinase substrate in neurons 2
ENSG00000100403	ZC3H7B	zinc finger CCCH-type containing 7B
ENSG00000100505	TRIM9	tripartite motif containing 9
ENSG00000100604	CHGA	chromogranin A (parathyroid secretory protein 1)
ENSG00000100865	CINP	cyclin-dependent kinase 2 interacting protein
ENSG00000100997	ABHD12	abhydrolase domain containing 12
ENSG00000101134	DOK5	docking protein 5
ENSG00000101158	NELFCD	negative elongation factor complex member C/D
ENSG00000101190	TCFL5	transcription factor-like 5 (basic helix-loop-helix)
ENSG00000101347	SAMHD1	SAM domain and HD domain 1
ENSG00000101558	VAPA	VAMP (vesicle-associated membrane protein)-associated protein A, 33kDa
ENSG00000102048	ASB9	ankyrin repeat and SOCS box containing 9
ENSG00000102144	PGK1	phosphoglycerate kinase 1
ENSG00000102189	EEA1	early endosome antigen 1
ENSG00000102543	CDADC1	cytidine and dCMP deaminase domain containing 1
ENSG00000102554	KLF5	Kruppel-like factor 5 (intestinal)
ENSG00000102606	ARHGEF7	Rho guanine nucleotide exchange factor (GEF) 7
ENSG00000103852	TTC23	tetratricopeptide repeat domain 23
ENSG00000104081	BMF	Bcl2 modifying factor
ENSG00000104205	SGK3	serum/glucocorticoid regulated kinase family, member 3
ENSG00000104312	RIPK2	receptor-interacting serine-threonine kinase 2
ENSG00000104368	PLAT	plasminogen activator, tissue
ENSG00000104408	EIF3E	eukaryotic translation initiation factor 3, subunit E
ENSG00000104413	ESRP1	epithelial splicing regulatory protein 1
ENSG00000104760	FGL1	fibrinogen-like 1
ENSG00000104765	BNIP3L	BCL2/adenovirus E1B 19kDa interacting protein 3-like
ENSG00000105135	ILVBL	ilvB (bacterial acetolactate synthase)-like
ENSG00000105176	URI1	URI1, prefoldin-like chaperone
ENSG00000105851	PIK3CG	phosphatidylinositol-4,5-bisphosphate 3-kinase, catalytic subunit gamma
ENSG00000105856	HBP1	HMG-box transcription factor 1
ENSG00000105929	ATP6V0A4	ATPase, H+ transporting, lysosomal V0 subunit a4
ENSG00000105974	CAV1	caveolin 1, caveolae protein, 22kDa
ENSG00000105993	DNAJB6	DnaJ (Hsp40) homolog, subfamily B, member 6
ENSG00000106049	HIBADH	3-hydroxyisobutyrate dehydrogenase
ENSG00000106066	CPVL	carboxypeptidase, vitellogenic-like
ENSG00000106070	GRB10	growth factor receptor-bound protein 10
ENSG00000106261	ZKSCAN1	zinc finger with KRAB and SCAN domains 1
ENSG00000106278	PTPRZ1	protein tyrosine phosphatase, receptor-type, Z polypeptide 1
ENSG00000106536	POU6F2	POU class 6 homeobox 2
ENSG00000106546	AHR	aryl hydrocarbon receptor
ENSG00000106554	CHCHD3	coiled-coil-helix-coiled-coil-helix domain containing 3
ENSG00000106701	FSD1L	fibronectin type III and SPRY domain containing 1-like
ENSG00000106772	PRUNE2	prune homolog 2 (Drosophila)
ENSG00000106799	TGFBR1	transforming growth factor, beta receptor 1
ENSG00000107077	KDM4C	lysine (K)-specific demethylase 4C
ENSG00000107104	KANK1	KN motif and ankyrin repeat domains 1
ENSG00000107165	TYRP1	tyrosinase-related protein 1
ENSG00000107249	GLIS3	GLIS family zinc finger 3
ENSG00000107263	RAPGEF1	Rap guanine nucleotide exchange factor (GEF) 1
ENSG00000107290	SETX	senataxin
ENSG00000107521	HPS1	Hermansky-Pudlak syndrome 1
ENSG00000107611	CUBN	cubilin (intrinsic factor-cobalamin receptor)
ENSG00000107669	ATE1	arginyltransferase 1
ENSG00000107736	CDH23	cadherin-related 23
ENSG00000107742	SPOCK2	sparc/osteonectin, cwcv and kazal-like domains proteoglycan (testican) 2
ENSG00000107745	MICU1	mitochondrial calcium uptake 1
ENSG00000107758	PPP3CB	protein phosphatase 3, catalytic subunit, beta isozyme
ENSG00000107771	CCSER2	coiled-coil serine-rich protein 2
ENSG00000107789	MINPP1	multiple inositol-polyphosphate phosphatase 1
ENSG00000108018	SORCS1	sortilin-related VPS10 domain containing receptor 1
ENSG00000108465	CDK5RAP3	CDK5 regulatory subunit associated protein 3
ENSG00000108946	PRKAR1A	protein kinase, cAMP-dependent, regulatory, type I, alpha
ENSG00000109452	INPP4B	inositol polyphosphate-4-phosphatase, type II, 105kDa
ENSG00000109458	GAB1	GRB2-associated binding protein 1
ENSG00000109536	FRG1	FSHD region gene 1
ENSG00000109654	TRIM2	tripartite motif containing 2
ENSG00000109689	STIM2	stromal interaction molecule 2
ENSG00000109756	RAPGEF2	Rap guanine nucleotide exchange factor (GEF) 2
ENSG00000109771	LRP2BP	LRP2 binding protein
ENSG00000109819	PPARGC1A	peroxisome proliferator-activated receptor gamma, coactivator 1 alpha
ENSG00000109919	MTCH2	mitochondrial carrier 2
ENSG00000110063	DCPS	decapping enzyme, scavenger
ENSG00000110080	ST3GAL4	ST3 beta-galactoside alpha-2,3-sialyltransferase 4
ENSG00000110218	PANX1	pannexin 1
ENSG00000110436	SLC1A2	solute carrier family 1 (glial high affinity glutamate transporter), member 2
ENSG00000110693	SOX6	SRY (sex determining region Y)-box 6
ENSG00000110756	HPS5	Hermansky-Pudlak syndrome 5
ENSG00000110841	PPFIBP1	PTPRF interacting protein, binding protein 1 (liprin beta 1)
ENSG00000110871	COQ5	coenzyme Q5 homolog, methyltransferase (S. cerevisiae)
ENSG00000110880	CORO1C	coronin, actin binding protein, 1C
ENSG00000111305	GSG1	germ cell associated 1
ENSG00000111452	GPR133	G protein-coupled receptor 133
ENSG00000111540	RAB5B	RAB5B, member RAS oncogene family
ENSG00000111615	KRR1	KRR1, small subunit (SSU) processome component, homolog (yeast)
ENSG00000111696	NT5DC3	5'-nucleotidase domain containing 3
ENSG00000111783	RFX4	regulatory factor X, 4 (influences HLA class II expression)
ENSG00000111785	RIC8B	RIC8 guanine nucleotide exchange factor B
ENSG00000111799	COL12A1	collagen, type XII, alpha 1
ENSG00000111846	GCNT2	glucosaminyl (N-acetyl) transferase 2, I-branching enzyme (I blood group)
ENSG00000111859	NEDD9	neural precursor cell expressed, developmentally down-regulated 9
ENSG00000111961	SASH1	SAM and SH3 domain containing 1
ENSG00000112130	RNF8	ring finger protein 8, E3 ubiquitin protein ligase
ENSG00000112182	BACH2	BTB and CNC homology 1, basic leucine zipper transcription factor 2
ENSG00000112234	FBXL4	F-box and leucine-rich repeat protein 4
ENSG00000112273	HDGFL1	hepatoma derived growth factor-like 1
ENSG00000112339	HBS1L	HBS1-like (S. cerevisiae)
ENSG00000112365	ZBTB24	zinc finger and BTB domain containing 24
ENSG00000112367	FIG4	FIG4 homolog, SAC1 lipid phosphatase domain containing (S. cerevisiae)
ENSG00000112531	QKI	QKI, KH domain containing, RNA binding
ENSG00000112539	C6orf118	chromosome 6 open reading frame 118
ENSG00000112685	EXOC2	exocyst complex component 2
ENSG00000112769	LAMA4	laminin, alpha 4
ENSG00000112773	FAM46A	family with sequence similarity 46, member A
ENSG00000112983	BRD8	bromodomain containing 8
ENSG00000113013	HSPA9	heat shock 70kDa protein 9 (mortalin)
ENSG00000113140	SPARC	secreted protein, acidic, cysteine-rich (osteonectin)
ENSG00000113161	HMGCR	3-hydroxy-3-methylglutaryl-CoA reductase
ENSG00000113448	PDE4D	phosphodiesterase 4D, cAMP-specific
ENSG00000113456	RAD1	RAD1 homolog (S. pombe)
ENSG00000113578	FGF1	fibroblast growth factor 1 (acidic)
ENSG00000113583	C5orf15	chromosome 5 open reading frame 15
ENSG00000113657	DPYSL3	dihydropyrimidinase-like 3
ENSG00000114166	KAT2B	K(lysine) acetyltransferase 2B
ENSG00000114315	HES1	hes family bHLH transcription factor 1
ENSG00000114423	CBLB	Cbl proto-oncogene B, E3 ubiquitin protein ligase
ENSG00000114473	IQCG	IQ motif containing G
ENSG00000114757	PEX5L	peroxisomal biogenesis factor 5-like
ENSG00000114790	ARHGEF26	Rho guanine nucleotide exchange factor (GEF) 26
ENSG00000114796	KLHL24	kelch-like family member 24
ENSG00000114861	FOXP1	forkhead box P1
ENSG00000114948	ADAM23	ADAM metallopeptidase domain 23
ENSG00000115042	FAHD2A	fumarylacetoacetate hydrolase domain containing 2A
ENSG00000115183	TANC1	tetratricopeptide repeat, ankyrin repeat and coiled-coil containing 1
ENSG00000115221	LOC100505984	uncharacterized LOC100505984
ENSG00000115290	GRB14	growth factor receptor-bound protein 14
ENSG00000115295	CLIP4	CAP-GLY domain containing linker protein family, member 4
ENSG00000115306	SPTBN1	spectrin, beta, non-erythrocytic 1
ENSG00000115310	RTN4	reticulon 4
ENSG00000115325	DOK1	docking protein 1, 62kDa (downstream of tyrosine kinase 1)
ENSG00000115464	USP34	ubiquitin specific peptidase 34
ENSG00000115525	ST3GAL5	ST3 beta-galactoside alpha-2,3-sialyltransferase 5
ENSG00000115641	FHL2	four and a half LIM domains 2
ENSG00000115738	ID2	inhibitor of DNA binding 2, dominant negative helix-loop-helix protein
ENSG00000115762	PLEKHB2	pleckstrin homology domain containing, family B (evectins) member 2
ENSG00000115828	QPCT	glutaminyl-peptide cyclotransferase
ENSG00000115902	SLC1A4	solute carrier family 1 (glutamate/neutral amino acid transporter), member 4
ENSG00000115963	RND3	Rho family GTPase 3
ENSG00000116062	MSH6	mutS homolog 6
ENSG00000116120	FARSB	phenylalanyl-tRNA synthetase, beta subunit
ENSG00000116199	FAM20B	family with sequence similarity 20, member B
ENSG00000116285	ERRFI1	ERBB receptor feedback inhibitor 1
ENSG00000116406	EDEM3	ER degradation enhancer, mannosidase alpha-like 3
ENSG00000116641	DOCK7	dedicator of cytokinesis 7
ENSG00000116685	KIAA2013	KIAA2013
ENSG00000116701	NCF2	neutrophil cytosolic factor 2
ENSG00000116711	PLA2G4A	phospholipase A2, group IVA (cytosolic, calcium-dependent)
ENSG00000116717	GADD45A	growth arrest and DNA-damage-inducible, alpha
ENSG00000116729	WLS	wntless Wnt ligand secretion mediator
ENSG00000116731	PRDM2	PR domain containing 2, with ZNF domain
ENSG00000116761	CTH	cystathionase (cystathionine gamma-lyase)
ENSG00000116809	ZBTB17	zinc finger and BTB domain containing 17
ENSG00000116962	NID1	nidogen 1
ENSG00000116991	SIPA1L2	signal-induced proliferation-associated 1 like 2
ENSG00000117090	SLAMF1	signaling lymphocytic activation molecule family member 1
ENSG00000117115	PADI2	peptidyl arginine deiminase, type II
ENSG00000117155	SSX2IP	synovial sarcoma, X breakpoint 2 interacting protein
ENSG00000117528	ABCD3	ATP-binding cassette, sub-family D (ALD), member 3
ENSG00000117597	DIEXF	digestive organ expansion factor homolog (zebrafish)
ENSG00000117632	STMN1	stathmin 1
ENSG00000117650	NEK2	NIMA-related kinase 2
ENSG00000117859	OSBPL9	oxysterol binding protein-like 9
ENSG00000118113	MMP8	matrix metallopeptidase 8 (neutrophil collagenase)
ENSG00000118194	TNNT2	troponin T type 2 (cardiac)
ENSG00000118245	TNP1	transition protein 1 (during histone to protamine replacement)
ENSG00000118257	NRP2	neuropilin 2
ENSG00000118263	KLF7	Kruppel-like factor 7 (ubiquitous)
ENSG00000118298	CA14	carbonic anhydrase XIV
ENSG00000118503	TNFAIP3	tumor necrosis factor, alpha-induced protein 3
ENSG00000118507	AKAP7	A kinase (PRKA) anchor protein 7
ENSG00000118514	ALDH8A1	aldehyde dehydrogenase 8 family, member A1
ENSG00000118515	SGK1	serum/glucocorticoid regulated kinase 1
ENSG00000118690	ARMC2	armadillo repeat containing 2
ENSG00000118729	CASQ2	calsequestrin 2 (cardiac muscle)
ENSG00000118849	RARRES1	retinoic acid receptor responder (tazarotene induced) 1
ENSG00000118922	KLF12	Kruppel-like factor 12
ENSG00000119138	KLF9	Kruppel-like factor 9
ENSG00000119139	TJP2	tight junction protein 2
ENSG00000119280	C1orf198	chromosome 1 open reading frame 198
ENSG00000119326	CTNNAL1	catenin (cadherin-associated protein), alpha-like 1
ENSG00000119411	BSPRY	B-box and SPRY domain containing
ENSG00000119457	SLC46A2	solute carrier family 46, member 2
ENSG00000119638	NEK9	NIMA-related kinase 9
ENSG00000119669	IRF2BPL	interferon regulatory factor 2 binding protein-like
ENSG00000119718	EIF2B2	eukaryotic translation initiation factor 2B, subunit 2 beta, 39kDa
ENSG00000119771	KLHL29	kelch-like family member 29
ENSG00000119922	IFIT2	interferon-induced protein with tetratricopeptide repeats 2
ENSG00000119950	MXI1	MAX interactor 1, dimerization protein
ENSG00000120049	KCNIP2	Kv channel interacting protein 2
ENSG00000120160	EQTN	equatorin, sperm acrosome associated
ENSG00000120254	MTHFD1L	methylenetetrahydrofolate dehydrogenase (NADP+ dependent) 1-like
ENSG00000120265	PCMT1	protein-L-isoaspartate (D-aspartate) O-methyltransferase
ENSG00000120563	LYZL1	lysozyme-like 1
ENSG00000120693	SMAD9	SMAD family member 9
ENSG00000120800	UTP20	UTP20, small subunit (SSU) processome component, homolog (yeast)
ENSG00000121005	CRISPLD1	cysteine-rich secretory protein LCCL domain containing 1
ENSG00000121068	TBX2	T-box 2
ENSG00000121101	TEX14	testis expressed 14
ENSG00000121440	PDZRN3	PDZ domain containing ring finger 3
ENSG00000121743	GJA3	gap junction protein, alpha 3, 46kDa
ENSG00000122042	UBL3	ubiquitin-like 3
ENSG00000122145	TBX22	T-box 22
ENSG00000122299	ZC3H7A	zinc finger CCCH-type containing 7A
ENSG00000122482	ZNF644	zinc finger protein 644
ENSG00000122574	WIPF3	WAS/WASL interacting protein family, member 3
ENSG00000122644	ARL4A	ADP-ribosylation factor-like 4A
ENSG00000122733	KIAA1045	KIAA1045
ENSG00000122786	CALD1	caldesmon 1
ENSG00000122966	CIT	citron (rho-interacting, serine/threonine kinase 21)
ENSG00000122970	IFT81	intraflagellar transport 81 homolog (Chlamydomonas)
ENSG00000123124	WWP1	WW domain containing E3 ubiquitin protein ligase 1
ENSG00000123201	GUCY1B2	guanylate cyclase 1, soluble, beta 2 (pseudogene)
ENSG00000123560	PLP1	proteolipid protein 1
ENSG00000123684	LPGAT1	lysophosphatidylglycerol acyltransferase 1
ENSG00000123892	RAB38	RAB38, member RAS oncogene family
ENSG00000124003	MOGAT1	monoacylglycerol O-acyltransferase 1
ENSG00000124089	MC3R	melanocortin 3 receptor
ENSG00000124126	PREX1	phosphatidylinositol-3,4,5-trisphosphate-dependent Rac exchange factor 1
ENSG00000124134	KCNS1	potassium voltage-gated channel, delayed-rectifier, subfamily S, member 1
ENSG00000124177	CHD6	chromodomain helicase DNA binding protein 6
ENSG00000124237	C20orf85	chromosome 20 open reading frame 85
ENSG00000124299	PEPD	peptidase D
ENSG00000124614	RPS10	ribosomal protein S10
ENSG00000124743	KLHL31	kelch-like family member 31
ENSG00000124772	CPNE5	copine V
ENSG00000124782	RREB1	ras responsive element binding protein 1
ENSG00000124802	EEF1E1	eukaryotic translation elongation factor 1 epsilon 1
ENSG00000124900	TRIM51	tripartite motif-containing 51
ENSG00000125409	TEKT3	tektin 3
ENSG00000125753	VASP	vasodilator-stimulated phosphoprotein
ENSG00000125772	GPCPD1	glycerophosphocholine phosphodiesterase GDE1 homolog (S. cerevisiae)
ENSG00000125864	BFSP1	beaded filament structural protein 1, filensin
ENSG00000125931	CITED1	Cbp/p300-interacting transactivator, with Glu/Asp-rich carboxy-terminal domain, 1
ENSG00000126775	ATG14	autophagy related 14
ENSG00000126785	RHOJ	ras homolog family member J
ENSG00000126878	AIF1L	allograft inflammatory factor 1-like
ENSG00000126934	MAP2K2	mitogen-activated protein kinase kinase 2
ENSG00000127377	CRYGN	crystallin, gamma N
ENSG00000127483	HP1BP3	heterochromatin protein 1, binding protein 3
ENSG00000127515	OR7A10	olfactory receptor, family 7, subfamily A, member 10
ENSG00000127863	TNFRSF19	tumor necrosis factor receptor superfamily, member 19
ENSG00000128052	KDR	kinase insert domain receptor (a type III receptor tyrosine kinase)
ENSG00000128253	RFPL2	ret finger protein-like 2
ENSG00000128285	MCHR1	melanin-concentrating hormone receptor 1
ENSG00000128487	SPECC1	sperm antigen with calponin homology and coiled-coil domains 1
ENSG00000129521	EGLN3	egl-9 family hypoxia-inducible factor 3
ENSG00000129691	ASH2L	ash2 (absent, small, or homeotic)-like (Drosophila)
ENSG00000130066	SAT1	spermidine/spermine N1-acetyltransferase 1
ENSG00000130150	MOSPD2	motile sperm domain containing 2
ENSG00000130304	SLC27A1	solute carrier family 27 (fatty acid transporter), member 1
ENSG00000130338	TULP4	tubby like protein 4
ENSG00000130429	ARPC1B	actin related protein 2/3 complex, subunit 1B, 41kDa
ENSG00000130779	CLIP1	CAP-GLY domain containing linker protein 1
ENSG00000130956	HABP4	hyaluronan binding protein 4
ENSG00000131236	CAP1	CAP, adenylate cyclase-associated protein 1 (yeast)
ENSG00000131462	TUBG1	tubulin, gamma 1
ENSG00000131732	ZCCHC9	zinc finger, CCHC domain containing 9
ENSG00000131773	KHDRBS3	KH domain containing, RNA binding, signal transduction associated 3
ENSG00000131873	CHSY1	chondroitin sulfate synthase 1
ENSG00000131969	ABHD12B	abhydrolase domain containing 12B
ENSG00000131981	LGALS3	lectin, galactoside-binding, soluble, 3
ENSG00000132002	DNAJB1	DnaJ (Hsp40) homolog, subfamily B, member 1
ENSG00000132122	SPATA6	spermatogenesis associated 6
ENSG00000132185	FCRLA	Fc receptor-like A
ENSG00000132323	ILKAP	integrin-linked kinase-associated serine/threonine phosphatase
ENSG00000132383	RPA1	replication protein A1, 70kDa
ENSG00000132394	EEFSEC	eukaryotic elongation factor, selenocysteine-tRNA-specific
ENSG00000132406	TMEM128	transmembrane protein 128
ENSG00000132640	BTBD3	BTB (POZ) domain containing 3
ENSG00000132670	PTPRA	protein tyrosine phosphatase, receptor type, A
ENSG00000132694	ARHGEF11	Rho guanine nucleotide exchange factor (GEF) 11
ENSG00000132763	MMACHC	methylmalonic aciduria (cobalamin deficiency) cblC type, with homocystinuria
ENSG00000132781	MUTYH	mutY homolog
ENSG00000132874	SLC14A2	solute carrier family 14 (urea transporter), member 2
ENSG00000133059	DSTYK	dual serine/threonine and tyrosine protein kinase
ENSG00000133069	TMCC2	transmembrane and coiled-coil domain family 2
ENSG00000133121	STARD13	StAR-related lipid transfer (START) domain containing 13
ENSG00000133193	FAM104A	family with sequence similarity 104, member A
ENSG00000133195	SLC39A11	solute carrier family 39, member 11
ENSG00000133424	LARGE	like-glycosyltransferase
ENSG00000133454	MYO18B	myosin XVIIIB
ENSG00000133606	MKRN1	makorin ring finger protein 1
ENSG00000133704	IPO8	importin 8
ENSG00000133943	C14orf159	chromosome 14 open reading frame 159
ENSG00000134061	CD180	CD180 molecule
ENSG00000134215	VAV3	vav 3 guanine nucleotide exchange factor
ENSG00000134249	ADAM30	ADAM metallopeptidase domain 30
ENSG00000134250	NOTCH2	notch 2
ENSG00000134452	FBXO18	F-box protein, helicase, 18
ENSG00000134463	ECHDC3	enoyl CoA hydratase domain containing 3
ENSG00000134532	SOX5	SRY (sex determining region Y)-box 5
ENSG00000134686	PHC2	polyhomeotic homolog 2 (Drosophila)
ENSG00000134698	AGO4	argonaute RISC catalytic component 4
ENSG00000134717	BTF3L4	basic transcription factor 3-like 4
ENSG00000134882	UBAC2	UBA domain containing 2
ENSG00000134954	ETS1	v-ets avian erythroblastosis virus E26 oncogene homolog 1
ENSG00000135018	UBQLN1	ubiquilin 1
ENSG00000135046	ANXA1	annexin A1
ENSG00000135090	TAOK3	TAO kinase 3
ENSG00000135218	CD36	CD36 molecule (thrombospondin receptor)
ENSG00000135250	SRPK2	SRSF protein kinase 2
ENSG00000135269	TES	testis derived transcript (3 LIM domains)
ENSG00000135272	MDFIC	MyoD family inhibitor domain containing
ENSG00000135333	EPHA7	EPH receptor A7
ENSG00000135362	PRR5L	proline rich 5 like
ENSG00000135378	PRRG4	proline rich Gla (G-carboxyglutamic acid) 4 (transmembrane)
ENSG00000135390	ATP5G2	ATP synthase, H+ transporting, mitochondrial Fo complex, subunit C2 (subunit 9)
ENSG00000135540	NHSL1	NHS-like 1
ENSG00000135549	PKIB	protein kinase (cAMP-dependent, catalytic) inhibitor beta
ENSG00000135678	CPM	carboxypeptidase M
ENSG00000135720	DYNC1LI2	dynein, cytoplasmic 1, light intermediate chain 2
ENSG00000135823	STX6	syntaxin 6
ENSG00000135837	CEP350	centrosomal protein 350kDa
ENSG00000135862	LAMC1	laminin, gamma 1 (formerly LAMB2)
ENSG00000135912	TTLL4	tubulin tyrosine ligase-like family, member 4
ENSG00000135919	SERPINE2	serpin peptidase inhibitor, clade E (nexin, plasminogen activator inhibitor type 1), member 2
ENSG00000135929	CYP27A1	cytochrome P450, family 27, subfamily A, polypeptide 1
ENSG00000135931	ARMC9	armadillo repeat containing 9
ENSG00000135966	TGFBRAP1	transforming growth factor, beta receptor associated protein 1
ENSG00000136014	USP44	ubiquitin specific peptidase 44
ENSG00000136040	PLXNC1	plexin C1
ENSG00000136044	APPL2	adaptor protein, phosphotyrosine interaction, PH domain and leucine zipper containing 2
ENSG00000136141	LRCH1	leucine-rich repeats and calponin homology (CH) domain containing 1
ENSG00000136144	RCBTB1	regulator of chromosome condensation (RCC1) and BTB (POZ) domain containing protein 1
ENSG00000136160	EDNRB	endothelin receptor type B
ENSG00000136205	TNS3	tensin 3
ENSG00000136237	RAPGEF5	Rap guanine nucleotide exchange factor (GEF) 5
ENSG00000136244	IL6	interleukin 6 (interferon, beta 2)
ENSG00000136636	KCTD3	potassium channel tetramerization domain containing 3
ENSG00000136643	RPS6KC1	ribosomal protein S6 kinase, 52kDa, polypeptide 1
ENSG00000136738	STAM	signal transducing adaptor molecule (SH3 domain and ITAM motif) 1
ENSG00000136754	ABI1	abl-interactor 1
ENSG00000136826	KLF4	Kruppel-like factor 4 (gut)
ENSG00000136854	STXBP1	syntaxin binding protein 1
ENSG00000136856	SLC2A8	solute carrier family 2 (facilitated glucose transporter), member 8
ENSG00000136861	CDK5RAP2	CDK5 regulatory subunit associated protein 2
ENSG00000136868	SLC31A1	solute carrier family 31 (copper transporter), member 1
ENSG00000136938	ANP32B	acidic (leucine-rich) nuclear phosphoprotein 32 family, member B
ENSG00000136999	NOV	nephroblastoma overexpressed
ENSG00000137198	GMPR	guanosine monophosphate reductase
ENSG00000137265	IRF4	interferon regulatory factor 4
ENSG00000137331	IER3	immediate early response 3
ENSG00000137393	RNF144B	ring finger protein 144B
ENSG00000137441	FGFBP2	fibroblast growth factor binding protein 2
ENSG00000137491	SLCO2B1	solute carrier organic anion transporter family, member 2B1
ENSG00000137501	SYTL2	synaptotagmin-like 2
ENSG00000137513	NARS2	asparaginyl-tRNA synthetase 2, mitochondrial (putative)
ENSG00000137575	SDCBP	syndecan binding protein (syntenin)
ENSG00000137673	MMP7	matrix metallopeptidase 7 (matrilysin, uterine)
ENSG00000137674	MMP20	matrix metallopeptidase 20
ENSG00000137693	YAP1	Yes-associated protein 1
ENSG00000137710	RDX	radixin
ENSG00000137807	KIF23	kinesin family member 23
ENSG00000137872	SEMA6D	sema domain, transmembrane domain (TM), and cytoplasmic domain, (semaphorin) 6D
ENSG00000137936	BCAR3	breast cancer anti-estrogen resistance 3
ENSG00000138081	FBXO11	F-box protein 11
ENSG00000138101	DTNB	dystrobrevin, beta
ENSG00000138131	LOXL4	lysyl oxidase-like 4
ENSG00000138363	ATIC	5-aminoimidazole-4-carboxamide ribonucleotide formyltransferase/IMP cyclohydrolase
ENSG00000138439	FAM117B	family with sequence similarity 117, member B
ENSG00000138463	DIRC2	disrupted in renal carcinoma 2
ENSG00000138613	APH1B	APH1B gamma secretase subunit
ENSG00000138756	BMP2K	BMP2 inducible kinase
ENSG00000138760	SCARB2	scavenger receptor class B, member 2
ENSG00000138796	HADH	hydroxyacyl-CoA dehydrogenase
ENSG00000139116	KIF21A	kinesin family member 21A
ENSG00000139132	FGD4	FYVE, RhoGEF and PH domain containing 4
ENSG00000139163	ETNK1	ethanolamine kinase 1
ENSG00000139318	DUSP6	dual specificity phosphatase 6
ENSG00000139354	GAS2L3	growth arrest-specific 2 like 3
ENSG00000139517	LNX2	ligand of numb-protein X 2
ENSG00000139793	MBNL2	muscleblind-like splicing regulator 2
ENSG00000139915	MDGA2	MAM domain containing glycosylphosphatidylinositol anchor 2
ENSG00000139926	FRMD6	FERM domain containing 6
ENSG00000140379	BCL2A1	BCL2-related protein A1
ENSG00000140395	WDR61	WD repeat domain 61
ENSG00000140403	DNAJA4	DnaJ (Hsp40) homolog, subfamily A, member 4
ENSG00000140406	MESDC1	mesoderm development candidate 1
ENSG00000140470	ADAMTS17	ADAM metallopeptidase with thrombospondin type 1 motif, 17
ENSG00000140575	IQGAP1	IQ motif containing GTPase activating protein 1
ENSG00000140749	IGSF6	immunoglobulin superfamily, member 6
ENSG00000141198	TOM1L1	target of myb1 (chicken)-like 1
ENSG00000141252	VPS53	vacuolar protein sorting 53 homolog (S. cerevisiae)
ENSG00000141298	SSH2	slingshot protein phosphatase 2
ENSG00000141338	ABCA8	ATP-binding cassette, sub-family A (ABC1), member 8
ENSG00000141371	C17orf64	chromosome 17 open reading frame 64
ENSG00000141384	TAF4B	TAF4b RNA polymerase II, TATA box binding protein (TBP)-associated factor, 105kDa
ENSG00000142230	SAE1	SUMO1 activating enzyme subunit 1
ENSG00000142599	RERE	arginine-glutamic acid dipeptide (RE) repeats
ENSG00000143067	ZNF697	zinc finger protein 697
ENSG00000143106	PSMA5	proteasome (prosome, macropain) subunit, alpha type, 5
ENSG00000143171	RXRG	retinoid X receptor, gamma
ENSG00000143226	FCGR2A	Fc fragment of IgG, low affinity IIa, receptor (CD32)
ENSG00000143322	ABL2	c-abl oncogene 2, non-receptor tyrosine kinase
ENSG00000143341	HMCN1	hemicentin 1
ENSG00000143375	CGN	cingulin
ENSG00000143469	SYT14	synaptotagmin XIV
ENSG00000143507	DUSP10	dual specificity phosphatase 10
ENSG00000143515	ATP8B2	ATPase, aminophospholipid transporter, class I, type 8B, member 2
ENSG00000143653	SCCPDH	saccharopine dehydrogenase (putative)
ENSG00000143669	LYST	lysosomal trafficking regulator
ENSG00000143942	CHAC2	ChaC, cation transport regulator homolog 2 (E. coli)
ENSG00000144560	VGLL4	vestigial like 4 (Drosophila)
ENSG00000144642	RBMS3	RNA binding motif, single stranded interacting protein 3
ENSG00000144736	SHQ1	SHQ1, H/ACA ribonucleoprotein assembly factor
ENSG00000144847	IGSF11	immunoglobulin superfamily, member 11
ENSG00000144891	AGTR1	angiotensin II receptor, type 1
ENSG00000145012	LPP	LIM domain containing preferred translocation partner in lipoma
ENSG00000145147	SLIT2	slit homolog 2 (Drosophila)
ENSG00000145241	CENPC	centromere protein C
ENSG00000145293	ENOPH1	enolase-phosphatase 1
ENSG00000145439	CBR4	carbonyl reductase 4
ENSG00000145555	MYO10	myosin X
ENSG00000145685	LHFPL2	lipoma HMGIC fusion partner-like 2
ENSG00000145990	GFOD1	glucose-fructose oxidoreductase domain containing 1
ENSG00000145996	CDKAL1	CDK5 regulatory subunit associated protein 1-like 1
ENSG00000146013	GFRA3	GDNF family receptor alpha 3
ENSG00000146267	FAXC	failed axon connections homolog (Drosophila)
ENSG00000146376	ARHGAP18	Rho GTPase activating protein 18
ENSG00000146426	TIAM2	T-cell lymphoma invasion and metastasis 2
ENSG00000146433	TMEM181	transmembrane protein 181
ENSG00000146618	FERD3L	Fer3-like bHLH transcription factor
ENSG00000146674	IGFBP3	insulin-like growth factor binding protein 3
ENSG00000146857	STRA8	stimulated by retinoic acid 8
ENSG00000147003	TMEM27	transmembrane protein 27
ENSG00000147065	MSN	moesin
ENSG00000147099	HDAC8	histone deacetylase 8
ENSG00000147437	GNRH1	gonadotropin-releasing hormone 1 (luteinizing-releasing hormone)
ENSG00000147509	RGS20	regulator of G-protein signaling 20
ENSG00000147526	TACC1	transforming, acidic coiled-coil containing protein 1
ENSG00000147588	PMP2	peripheral myelin protein 2
ENSG00000147697	GSDMC	gasdermin C
ENSG00000147874	HAUS6	HAUS augmin-like complex, subunit 6
ENSG00000148120	C9orf3	chromosome 9 open reading frame 3
ENSG00000148158	SNX30	sorting nexin family member 30
ENSG00000148180	GSN	gelsolin
ENSG00000148429	USP6NL	USP6 N-terminal like
ENSG00000148450	MSRB2	methionine sulfoxide reductase B2
ENSG00000148484	RSU1	Ras suppressor protein 1
ENSG00000148498	PARD3	par-3 family cell polarity regulator
ENSG00000148655	C10orf11	chromosome 10 open reading frame 11
ENSG00000148737	TCF7L2	transcription factor 7-like 2 (T-cell specific, HMG-box)
ENSG00000148834	GSTO1	glutathione S-transferase omega 1
ENSG00000148848	ADAM12	ADAM metallopeptidase domain 12
ENSG00000149177	PTPRJ	protein tyrosine phosphatase, receptor type, J
ENSG00000149179	C11orf49	chromosome 11 open reading frame 49
ENSG00000149212	SESN3	sestrin 3
ENSG00000149289	ZC3H12C	zinc finger CCCH-type containing 12C
ENSG00000149294	NCAM1	neural cell adhesion molecule 1
ENSG00000149311	ATM	ataxia telangiectasia mutated
ENSG00000149503	INCENP	inner centromere protein antigens 135/155kDa
ENSG00000149557	FEZ1	fasciculation and elongation protein zeta 1 (zygin I)
ENSG00000149948	HMGA2	high mobility group AT-hook 2
ENSG00000150347	ARID5B	AT rich interactive domain 5B (MRF1-like)
ENSG00000150471	LPHN3	latrophilin 3
ENSG00000150477	KIAA1328	KIAA1328
ENSG00000150540	HNMT	histamine N-methyltransferase
ENSG00000150676	CCDC83	coiled-coil domain containing 83
ENSG00000150687	PRSS23	protease, serine, 23
ENSG00000150893	FREM2	FRAS1 related extracellular matrix protein 2
ENSG00000151023	ENKUR	enkurin, TRPC channel interacting protein
ENSG00000151292	CSNK1G3	casein kinase 1, gamma 3
ENSG00000151320	AKAP6	A kinase (PRKA) anchor protein 6
ENSG00000151322	NPAS3	neuronal PAS domain protein 3
ENSG00000151364	KCTD14	potassium channel tetramerization domain containing 14
ENSG00000151379	MSGN1	mesogenin 1
ENSG00000151414	NEK7	NIMA-related kinase 7
ENSG00000151491	EPS8	epidermal growth factor receptor pathway substrate 8
ENSG00000151552	QDPR	quinoid dihydropteridine reductase
ENSG00000151576	QTRTD1	queuine tRNA-ribosyltransferase domain containing 1
ENSG00000151612	ZNF827	zinc finger protein 827
ENSG00000151690	MFSD6	major facilitator superfamily domain containing 6
ENSG00000151692	RNF144A	ring finger protein 144A
ENSG00000151693	ASAP2	ArfGAP with SH3 domain, ankyrin repeat and PH domain 2
ENSG00000151743	AMN1	antagonist of mitotic exit network 1 homolog (S. cerevisiae)
ENSG00000151746	BICD1	bicaudal D homolog 1 (Drosophila)
ENSG00000152056	AP1S3	adaptor-related protein complex 1, sigma 3 subunit
ENSG00000152061	RABGAP1L	RAB GTPase activating protein 1-like
ENSG00000152242	C18orf25	chromosome 18 open reading frame 25
ENSG00000152377	SPOCK1	sparc/osteonectin, cwcv and kazal-like domains proteoglycan (testican) 1
ENSG00000152457	DCLRE1C	DNA cross-link repair 1C
ENSG00000152492	CCDC50	coiled-coil domain containing 50
ENSG00000152601	MBNL1	muscleblind-like splicing regulator 1
ENSG00000152670	DDX4	DEAD (Asp-Glu-Ala-Asp) box polypeptide 4
ENSG00000152689	RASGRP3	RAS guanyl releasing protein 3 (calcium and DAG-regulated)
ENSG00000152818	UTRN	utrophin
ENSG00000152822	GRM1	glutamate receptor, metabotropic 1
ENSG00000152953	STK32B	serine/threonine kinase 32B
ENSG00000152954	NRSN1	neurensin 1
ENSG00000153046	CDYL	chromodomain protein, Y-like
ENSG00000153071	DAB2	Dab, mitogen-responsive phosphoprotein, homolog 2 (Drosophila)
ENSG00000153317	ASAP1	ArfGAP with SH3 domain, ankyrin repeat and PH domain 1
ENSG00000153707	PTPRD	protein tyrosine phosphatase, receptor type, D
ENSG00000153944	MSI2	musashi RNA-binding protein 2
ENSG00000154027	AK5	adenylate kinase 5
ENSG00000154127	UBASH3B	ubiquitin associated and SH3 domain containing B
ENSG00000154153	FAM134B	family with sequence similarity 134, member B
ENSG00000154162	CDH12	cadherin 12, type 2 (N-cadherin 2)
ENSG00000154263	ABCA10	ATP-binding cassette, sub-family A (ABC1), member 10
ENSG00000154274	C4orf19	chromosome 4 open reading frame 19
ENSG00000154309	DISP1	dispatched homolog 1 (Drosophila)
ENSG00000154310	TNIK	TRAF2 and NCK interacting kinase
ENSG00000154380	ENAH	enabled homolog (Drosophila)
ENSG00000154415	PPP1R3A	protein phosphatase 1, regulatory subunit 3A
ENSG00000154493	C10orf90	chromosome 10 open reading frame 90
ENSG00000154511	FAM69A	family with sequence similarity 69, member A
ENSG00000154556	SORBS2	sorbin and SH3 domain containing 2
ENSG00000154608	CEP170P1	centrosomal protein 170kDa pseudogene 1
ENSG00000154642	C21orf91	chromosome 21 open reading frame 91
ENSG00000154845	PPP4R1	protein phosphatase 4, regulatory subunit 1
ENSG00000155096	AZIN1	antizyme inhibitor 1
ENSG00000155130	MARCKS	myristoylated alanine-rich protein kinase C substrate
ENSG00000155324	GRAMD3	GRAM domain containing 3
ENSG00000155329	ZCCHC10	zinc finger, CCHC domain containing 10
ENSG00000155621	C9orf85	chromosome 9 open reading frame 85
ENSG00000155886	SLC24A2	solute carrier family 24 (sodium/potassium/calcium exchanger), member 2
ENSG00000155903	RASA2	RAS p21 protein activator 2
ENSG00000156049	GNA14	guanine nucleotide binding protein (G protein), alpha 14
ENSG00000156140	ADAMTS3	ADAM metallopeptidase with thrombospondin type 1 motif, 3
ENSG00000156299	TIAM1	T-cell lymphoma invasion and metastasis 1
ENSG00000156475	PPP2R2B	protein phosphatase 2, regulatory subunit B, beta
ENSG00000156508	EEF1A1	eukaryotic translation elongation factor 1 alpha 1
ENSG00000156804	FBXO32	F-box protein 32
ENSG00000156831	NSMCE2	non-SMC element 2, MMS21 homolog (S. cerevisiae)
ENSG00000156958	GALK2	galactokinase 2
ENSG00000157404	KIT	v-kit Hardy-Zuckerman 4 feline sarcoma viral oncogene homolog
ENSG00000157423	HYDIN	HYDIN, axonemal central pair apparatus protein
ENSG00000157483	MYO1E	myosin IE
ENSG00000157540	DYRK1A	dual-specificity tyrosine-(Y)-phosphorylation regulated kinase 1A
ENSG00000157800	SLC37A3	solute carrier family 37, member 3
ENSG00000157837	SPPL3	signal peptide peptidase like 3
ENSG00000157985	AGAP1	ArfGAP with GTPase domain, ankyrin repeat and PH domain 1
ENSG00000158417	EIF5B	eukaryotic translation initiation factor 5B
ENSG00000158470	B4GALT5	UDP-Gal:betaGlcNAc beta 1,4- galactosyltransferase, polypeptide 5
ENSG00000158669	AGPAT6	1-acylglycerol-3-phosphate O-acyltransferase 6
ENSG00000158683	PKD1L1	polycystic kidney disease 1 like 1
ENSG00000158747	NBL1	neuroblastoma 1, DAN family BMP antagonist
ENSG00000158987	RAPGEF6	Rap guanine nucleotide exchange factor (GEF) 6
ENSG00000159023	EPB41	erythrocyte membrane protein band 4.1 (elliptocytosis 1, RH-linked)
ENSG00000159200	RCAN1	regulator of calcineurin 1
ENSG00000159216	LOC100506403	uncharacterized LOC100506403
ENSG00000159256	MORC3	MORC family CW-type zinc finger 3
ENSG00000159263	SIM2	single-minded family bHLH transcription factor 2
ENSG00000159871	LYPD5	LY6/PLAUR domain containing 5
ENSG00000160007	ARHGAP35	Rho GTPase activating protein 35
ENSG00000160075	SSU72	SSU72 RNA polymerase II CTD phosphatase homolog (S. cerevisiae)
ENSG00000160094	ZNF362	zinc finger protein 362
ENSG00000160226	C21orf2	chromosome 21 open reading frame 2
ENSG00000160310	PRMT2	protein arginine methyltransferase 2
ENSG00000160563	MED27	mediator complex subunit 27
ENSG00000161912	ADCY10P1	adenylate cyclase 10 (soluble) pseudogene 1
ENSG00000162104	ADCY9	adenylate cyclase 9
ENSG00000162511	LAPTM5	lysosomal protein transmembrane 5
ENSG00000162599	NFIA	nuclear factor I/A
ENSG00000162601	MYSM1	Myb-like, SWIRM and MPN domains 1
ENSG00000162630	B3GALT2	UDP-Gal:betaGlcNAc beta 1,3-galactosyltransferase, polypeptide 2
ENSG00000162641	AKNAD1	AKNA domain containing 1
ENSG00000162783	IER5	immediate early response 5
ENSG00000162869	PPP1R21	protein phosphatase 1, regulatory subunit 21
ENSG00000162882	HAAO	3-hydroxyanthranilate 3,4-dioxygenase
ENSG00000162946	DISC1	disrupted in schizophrenia 1
ENSG00000163081	CCDC140	coiled-coil domain containing 140
ENSG00000163093	BBS5	Bardet-Biedl syndrome 5
ENSG00000163171	CDC42EP3	CDC42 effector protein (Rho GTPase binding) 3
ENSG00000163320	CGGBP1	CGG triplet repeat binding protein 1
ENSG00000163331	DAPL1	death associated protein-like 1
ENSG00000163359	COL6A3	collagen, type VI, alpha 3
ENSG00000163380	LMOD3	leiomodin 3 (fetal)
ENSG00000163508	EOMES	eomesodermin
ENSG00000163513	TGFBR2	transforming growth factor, beta receptor II (70/80kDa)
ENSG00000163539	CLASP2	cytoplasmic linker associated protein 2
ENSG00000163541	SUCLG1	succinate-CoA ligase, alpha subunit
ENSG00000163565	IFI16	interferon, gamma-inducible protein 16
ENSG00000163599	CTLA4	cytotoxic T-lymphocyte-associated protein 4
ENSG00000163605	PPP4R2	protein phosphatase 4, regulatory subunit 2
ENSG00000163618	CADPS	Ca++-dependent secretion activator
ENSG00000163629	PTPN13	protein tyrosine phosphatase, non-receptor type 13 (APO-1/CD95 (Fas)-associated phosphatase)
ENSG00000163661	PTX3	pentraxin 3, long
ENSG00000163684	RPP14	ribonuclease P/MRP 14kDa subunit
ENSG00000163689	C3orf67	chromosome 3 open reading frame 67
ENSG00000163697	APBB2	amyloid beta (A4) precursor protein-binding, family B, member 2
ENSG00000163915	C3orf65	chromosome 3 open reading frame 65
ENSG00000164040	PGRMC2	progesterone receptor membrane component 2
ENSG00000164111	ANXA5	annexin A5
ENSG00000164172	MOCS2	molybdenum cofactor synthesis 2
ENSG00000164175	SLC45A2	solute carrier family 45, member 2
ENSG00000164180	TMEM161B	transmembrane protein 161B
ENSG00000164244	PRRC1	proline-rich coiled-coil 1
ENSG00000164292	RHOBTB3	Rho-related BTB domain containing 3
ENSG00000164300	SERINC5	serine incorporator 5
ENSG00000164403	SHROOM1	shroom family member 1
ENSG00000164418	GRIK2	glutamate receptor, ionotropic, kainate 2
ENSG00000164434	FABP7	fatty acid binding protein 7, brain
ENSG00000164494	PDSS2	prenyl (decaprenyl) diphosphate synthase, subunit 2
ENSG00000164627	KIF6	kinesin family member 6
ENSG00000164645	C7orf62	chromosome 7 open reading frame 62
ENSG00000164684	ZNF704	zinc finger protein 704
ENSG00000164687	FABP5	fatty acid binding protein 5 (psoriasis-associated)
ENSG00000164741	DLC1	deleted in liver cancer 1
ENSG00000164904	ALDH7A1	aldehyde dehydrogenase 7 family, member A1
ENSG00000164932	CTHRC1	collagen triple helix repeat containing 1
ENSG00000164953	TMEM67	transmembrane protein 67
ENSG00000164989	CCDC171	coiled-coil domain containing 171
ENSG00000165091	TMC1	transmembrane channel-like 1
ENSG00000165120	SSMEM1	serine-rich single-pass membrane protein 1
ENSG00000165181	C9orf84	chromosome 9 open reading frame 84
ENSG00000165192	ASB11	ankyrin repeat and SOCS box containing 11
ENSG00000165309	ARMC3	armadillo repeat containing 3
ENSG00000165323	FAT3	FAT atypical cadherin 3
ENSG00000165389	SPTSSA	serine palmitoyltransferase, small subunit A
ENSG00000165471	MBL2	mannose-binding lectin (protein C) 2, soluble
ENSG00000165495	PKNOX2	PBX/knotted 1 homeobox 2
ENSG00000165630	PRPF18	pre-mRNA processing factor 18
ENSG00000165832	TRUB1	TruB pseudouridine (psi) synthase family member 1
ENSG00000165861	ZFYVE1	zinc finger, FYVE domain containing 1
ENSG00000165863	C10orf82	chromosome 10 open reading frame 82
ENSG00000165891	E2F7	E2F transcription factor 7
ENSG00000165895	ARHGAP42	Rho GTPase activating protein 42
ENSG00000166006	KCNC2	potassium voltage-gated channel, Shaw-related subfamily, member 2
ENSG00000166016	ABTB2	ankyrin repeat and BTB (POZ) domain containing 2
ENSG00000166025	AMOTL1	angiomotin like 1
ENSG00000166068	SPRED1	sprouty-related, EVH1 domain containing 1
ENSG00000166159	LRTM2	leucine-rich repeats and transmembrane domains 2
ENSG00000166272	WBP1L	WW domain binding protein 1-like
ENSG00000166387	PPFIBP2	PTPRF interacting protein, binding protein 2 (liprin beta 2)
ENSG00000166415	WDR72	WD repeat domain 72
ENSG00000166501	PRKCB	protein kinase C, beta
ENSG00000166562	SEC11C	SEC11 homolog C (S. cerevisiae)
ENSG00000166682	TMPRSS5	transmembrane protease, serine 5
ENSG00000166833	NAV2	neuron navigator 2
ENSG00000166922	SCG5	secretogranin V (7B2 protein)
ENSG00000166974	MAPRE2	microtubule-associated protein, RP/EB family, member 2
ENSG00000166979	EVA1C	eva-1 homolog C (C. elegans)
ENSG00000167106	FAM102A	family with sequence similarity 102, member A
ENSG00000167291	TBC1D16	TBC1 domain family, member 16
ENSG00000168036	CTNNB1	catenin (cadherin-associated protein), beta 1, 88kDa
ENSG00000168129	LOC1720	dihydrofolate reductase pseudogene
ENSG00000168214	RBPJ	recombination signal binding protein for immunoglobulin kappa J region
ENSG00000168263	KCNV2	potassium channel, subfamily V, member 2
ENSG00000168297	PXK	PX domain containing serine/threonine kinase
ENSG00000168522	FNTA	farnesyltransferase, CAAX box, alpha
ENSG00000168589	DYNLRB2	dynein, light chain, roadblock-type 2
ENSG00000168672	FAM84B	family with sequence similarity 84, member B
ENSG00000168818	STX18	syntaxin 18
ENSG00000168824	NSG1	neuron specific gene family member 1
ENSG00000168916	ZNF608	zinc finger protein 608
ENSG00000168952	STXBP6	syntaxin binding protein 6 (amisyn)
ENSG00000168955	TM4SF20	transmembrane 4 L six family member 20
ENSG00000168994	PXDC1	PX domain containing 1
ENSG00000169067	ACTBL2	actin, beta-like 2
ENSG00000169327	OR5AU1	olfactory receptor, family 5, subfamily AU, member 1
ENSG00000169330	KIAA1024	KIAA1024
ENSG00000169397	RNASE3	ribonuclease, RNase A family, 3
ENSG00000169429	IL8	interleukin 8
ENSG00000169499	PLEKHA2	pleckstrin homology domain containing, family A (phosphoinositide binding specific) member 2
ENSG00000169507	SLC38A11	solute carrier family 38, member 11
ENSG00000169550	MUC15	mucin 15, cell surface associated
ENSG00000169564	PCBP1	poly(rC) binding protein 1
ENSG00000169604	ANTXR1	anthrax toxin receptor 1
ENSG00000169756	LIMS1	LIM and senescent cell antigen-like domains 1
ENSG00000169760	NLGN1	neuroligin 1
ENSG00000169814	BTD	biotinidase
ENSG00000169851	PCDH7	protocadherin 7
ENSG00000169855	ROBO1	roundabout, axon guidance receptor, homolog 1 (Drosophila)
ENSG00000169860	P2RY1	purinergic receptor P2Y, G-protein coupled, 1
ENSG00000169896	ITGAM	integrin, alpha M (complement component 3 receptor 3 subunit)
ENSG00000169946	ZFPM2	zinc finger protein, FOG family member 2
ENSG00000170011	MYRIP	myosin VIIA and Rab interacting protein
ENSG00000170017	ALCAM	activated leukocyte cell adhesion molecule
ENSG00000170262	MRAP	melanocortin 2 receptor accessory protein
ENSG00000170264	FAM161A	family with sequence similarity 161, member A
ENSG00000170271	FAXDC2	fatty acid hydroxylase domain containing 2
ENSG00000170340	B3GNT2	UDP-GlcNAc:betaGal beta-1,3-N-acetylglucosaminyltransferase 2
ENSG00000170348	TMED10	transmembrane emp24-like trafficking protein 10 (yeast)
ENSG00000170390	DCLK2	doublecortin-like kinase 2
ENSG00000170525	PFKFB3	6-phosphofructo-2-kinase/fructose-2,6-biphosphatase 3
ENSG00000170579	DLGAP1	discs, large (Drosophila) homolog-associated protein 1
ENSG00000170624	SGCD	sarcoglycan, delta (35kDa dystrophin-associated glycoprotein)
ENSG00000170634	ACYP2	acylphosphatase 2, muscle type
ENSG00000170745	KCNS3	potassium voltage-gated channel, delayed-rectifier, subfamily S, member 3
ENSG00000170802	FOXN2	forkhead box N2
ENSG00000170820	FSHR	follicle stimulating hormone receptor
ENSG00000170893	TRH	thyrotropin-releasing hormone
ENSG00000170899	GSTA4	glutathione S-transferase alpha 4
ENSG00000170927	PKHD1	polycystic kidney and hepatic disease 1 (autosomal recessive)
ENSG00000170983	LINC00208	long intergenic non-protein coding RNA 208
ENSG00000171132	PRKCE	protein kinase C, epsilon
ENSG00000171291	ZNF439	zinc finger protein 439
ENSG00000171310	CHST11	carbohydrate (chondroitin 4) sulfotransferase 11
ENSG00000171444	MCC	mutated in colorectal cancers
ENSG00000171617	ENC1	ectodermal-neural cortex 1 (with BTB domain)
ENSG00000171631	P2RY6	pyrimidinergic receptor P2Y, G-protein coupled, 6
ENSG00000171634	BPTF	bromodomain PHD finger transcription factor
ENSG00000171681	ATF7IP	activating transcription factor 7 interacting protein
ENSG00000171723	GPHN	gephyrin
ENSG00000171735	CAMTA1	calmodulin binding transcription activator 1
ENSG00000171819	ANGPTL7	angiopoietin-like 7
ENSG00000171824	EXOSC10	exosome component 10
ENSG00000171877	FRMD5	FERM domain containing 5
ENSG00000171951	SCG2	secretogranin II
ENSG00000172139	SLC9C1	solute carrier family 9, subfamily C (Na+-transporting carboxylic acid decarboxylase), member 1
ENSG00000172164	SNTB1	syntrophin, beta 1 (dystrophin-associated protein A1, 59kDa, basic component 1)
ENSG00000172264	MACROD2	MACRO domain containing 2
ENSG00000172318	B3GALT1	UDP-Gal:betaGlcNAc beta 1,3-galactosyltransferase, polypeptide 1
ENSG00000172349	IL16	interleukin 16
ENSG00000172379	ARNT2	aryl-hydrocarbon receptor nuclear translocator 2
ENSG00000172458	IL17D	interleukin 17D
ENSG00000172493	AFF1	AF4/FMR2 family, member 1
ENSG00000172965	MIR4435-1HG	MIR4435-1 host gene (non-protein coding)
ENSG00000173065	FAM222B	family with sequence similarity 222, member B
ENSG00000173068	BNC2	basonuclin 2
ENSG00000173166	RAPH1	Ras association (RalGDS/AF-6) and pleckstrin homology domains 1
ENSG00000173273	TNKS	tankyrase, TRF1-interacting ankyrin-related ADP-ribose polymerase
ENSG00000173334	TRIB1	tribbles pseudokinase 1
ENSG00000173402	DAG1	dystroglycan 1 (dystrophin-associated glycoprotein 1)
ENSG00000173451	THAP2	THAP domain containing, apoptosis associated protein 2
ENSG00000173467	AGR3	anterior gradient 3
ENSG00000173482	PTPRM	protein tyrosine phosphatase, receptor type, M
ENSG00000173545	ZNF622	zinc finger protein 622
ENSG00000174136	RGMB	repulsive guidance molecule family member b
ENSG00000174156	GSTA3	glutathione S-transferase alpha 3
ENSG00000174437	ATP2A2	ATPase, Ca++ transporting, cardiac muscle, slow twitch 2
ENSG00000174456	C12orf76	chromosome 12 open reading frame 76
ENSG00000174738	NR1D2	nuclear receptor subfamily 1, group D, member 2
ENSG00000174799	CEP135	centrosomal protein 135kDa
ENSG00000175029	CTBP2	C-terminal binding protein 2
ENSG00000175183	CSRP2	cysteine and glycine-rich protein 2
ENSG00000175193	PARL	presenilin associated, rhomboid-like
ENSG00000175224	ATG13	autophagy related 13
ENSG00000175267	VWA3A	von Willebrand factor A domain containing 3A
ENSG00000175329	ISX	intestine-specific homeobox
ENSG00000175445	LPL	lipoprotein lipase
ENSG00000175600	SUGCT	succinylCoA:glutarate-CoA transferase
ENSG00000175619	OR4B1	olfactory receptor, family 4, subfamily B, member 1
ENSG00000175662	TOM1L2	target of myb1-like 2 (chicken)
ENSG00000175664	TEX26	testis expressed 26
ENSG00000175746	C15orf54	chromosome 15 open reading frame 54
ENSG00000175895	PLEKHF2	pleckstrin homology domain containing, family F (with FYVE domain) member 2
ENSG00000175946	KLHL38	kelch-like family member 38
ENSG00000176225	RTTN	rotatin
ENSG00000176402	GJC3	gap junction protein, gamma 3, 30.2kDa
ENSG00000176407	KCMF1	potassium channel modulatory factor 1
ENSG00000176566	DCAF4L2	DDB1 and CUL4 associated factor 4-like 2
ENSG00000176571	CNBD1	cyclic nucleotide binding domain containing 1
ENSG00000176749	CDK5R1	cyclin-dependent kinase 5, regulatory subunit 1 (p35)
ENSG00000176788	BASP1	brain abundant, membrane attached signal protein 1
ENSG00000176853	FAM91A1	family with sequence similarity 91, member A1
ENSG00000176890	TYMS	thymidylate synthetase
ENSG00000176927	EFCAB5	EF-hand calcium binding domain 5
ENSG00000177189	RPS6KA3	ribosomal protein S6 kinase, 90kDa, polypeptide 3
ENSG00000177300	CLDN22	claudin 22
ENSG00000177556	ATOX1	antioxidant 1 copper chaperone
ENSG00000177565	TBL1XR1	transducin (beta)-like 1 X-linked receptor 1
ENSG00000177694	NAALADL2	N-acetylated alpha-linked acidic dipeptidase-like 2
ENSG00000178104	PDE4DIP	phosphodiesterase 4D interacting protein
ENSG00000178163	ZNF518B	zinc finger protein 518B
ENSG00000178175	ZNF366	zinc finger protein 366
ENSG00000178301	AQP11	aquaporin 11
ENSG00000178409	BEND3	BEN domain containing 3
ENSG00000178562	CD28	CD28 molecule
ENSG00000178695	KCTD12	potassium channel tetramerization domain containing 12
ENSG00000178722	C5orf64	chromosome 5 open reading frame 64
ENSG00000178734	C13orf45	chromosome 13 open reading frame 45
ENSG00000178764	ZHX2	zinc fingers and homeoboxes 2
ENSG00000178776	C5orf46	chromosome 5 open reading frame 46
ENSG00000178795	GDPD4	glycerophosphodiester phosphodiesterase domain containing 4
ENSG00000178826	TMEM139	transmembrane protein 139
ENSG00000178996	SNX18	sorting nexin 18
ENSG00000179088	C12orf42	chromosome 12 open reading frame 42
ENSG00000179104	TMTC2	transmembrane and tetratricopeptide repeat containing 2
ENSG00000179241	LDLRAD3	low density lipoprotein receptor class A domain containing 3
ENSG00000179454	KLHL28	kelch-like family member 28
ENSG00000179456	ZBTB18	zinc finger and BTB domain containing 18
ENSG00000179766	ATP8B5P	ATPase, class I, type 8B, member 5, pseudogene
ENSG00000179776	CDH5	cadherin 5, type 2 (vascular endothelium)
ENSG00000180354	MTURN	maturin, neural progenitor differentiation regulator homolog (Xenopus)
ENSG00000180370	PAK2	p21 protein (Cdc42/Rac)-activated kinase 2
ENSG00000180447	GAS1	growth arrest-specific 1
ENSG00000180543	TSPYL5	TSPY-like 5
ENSG00000180694	TMEM64	transmembrane protein 64
ENSG00000181019	NQO1	NAD(P)H dehydrogenase, quinone 1
ENSG00000181472	ZBTB2	zinc finger and BTB domain containing 2
ENSG00000181722	ZBTB20	zinc finger and BTB domain containing 20
ENSG00000181867	FTMT	ferritin mitochondrial
ENSG00000181915	ADO	2-aminoethanethiol (cysteamine) dioxygenase
ENSG00000182256	GABRG3	gamma-aminobutyric acid (GABA) A receptor, gamma 3
ENSG00000182359	KBTBD3	kelch repeat and BTB (POZ) domain containing 3
ENSG00000182541	LIMK2	LIM domain kinase 2
ENSG00000182551	ADI1	acireductone dioxygenase 1
ENSG00000182606	TRAK1	trafficking protein, kinesin binding 1
ENSG00000182667	NTM	neurotrimin
ENSG00000182795	C1orf116	chromosome 1 open reading frame 116
ENSG00000182957	SPATA13	spermatogenesis associated 13
ENSG00000182963	GJC1	gap junction protein, gamma 1, 45kDa
ENSG00000182985	CADM1	cell adhesion molecule 1
ENSG00000183166	CALN1	calneuron 1
ENSG00000183571	PGPEP1L	pyroglutamyl-peptidase I-like
ENSG00000183655	KLHL25	kelch-like family member 25
ENSG00000183665	TRMT12	tRNA methyltransferase 12 homolog (S. cerevisiae)
ENSG00000183760	PAPL	iron/zinc purple acid phosphatase-like protein
ENSG00000183853	KIRREL	kin of IRRE like (Drosophila)
ENSG00000183977	PP2D1	protein phosphatase 2C-like domain containing 1
ENSG00000184178	SCFD2	sec1 family domain containing 2
ENSG00000184349	EFNA5	ephrin-A5
ENSG00000184486	POU3F2	POU class 3 homeobox 2
ENSG00000184588	PDE4B	phosphodiesterase 4B, cAMP-specific
ENSG00000184719	RNLS	renalase, FAD-dependent amine oxidase
ENSG00000184838	PRR16	proline rich 16
ENSG00000184898	RBM43	RNA binding motif protein 43
ENSG00000184903	IMMP2L	IMP2 inner mitochondrial membrane peptidase-like (S. cerevisiae)
ENSG00000184937	WT1	Wilms tumor 1
ENSG00000185008	ROBO2	roundabout, axon guidance receptor, homolog 2 (Drosophila)
ENSG00000185046	ANKS1B	ankyrin repeat and sterile alpha motif domain containing 1B
ENSG00000185650	ZFP36L1	ZFP36 ring finger protein-like 1
ENSG00000185670	ZBTB3	zinc finger and BTB domain containing 3
ENSG00000185737	NRG3	neuregulin 3
ENSG00000185818	NAT8L	N-acetyltransferase 8-like (GCN5-related, putative)
ENSG00000185917	SETD4	SET domain containing 4
ENSG00000185950	IRS2	insulin receptor substrate 2
ENSG00000186056	MATN1-AS1	MATN1 antisense RNA 1
ENSG00000186094	AGBL4	ATP/GTP binding protein-like 4
ENSG00000186106	ANKRD46	ankyrin repeat domain 46
ENSG00000186340	THBS2	thrombospondin 2
ENSG00000186448	ZNF197	zinc finger protein 197
ENSG00000186453	FAM228A	family with sequence similarity 228, member A
ENSG00000186469	GNG2	guanine nucleotide binding protein (G protein), gamma 2
ENSG00000186577	C6orf1	chromosome 6 open reading frame 1
ENSG00000186591	UBE2H	ubiquitin-conjugating enzyme E2H
ENSG00000186889	TMEM17	transmembrane protein 17
ENSG00000187079	TEAD1	TEA domain family member 1 (SV40 transcriptional enhancer factor)
ENSG00000187098	MITF	microphthalmia-associated transcription factor
ENSG00000187164	KIAA1598	KIAA1598
ENSG00000187239	FNBP1	formin binding protein 1
ENSG00000187498	COL4A1	collagen, type IV, alpha 1
ENSG00000187566	NHLRC1	NHL repeat containing E3 ubiquitin protein ligase 1
ENSG00000187600	LOC101805491	uncharacterized LOC101805491
ENSG00000187600	TMEM247	transmembrane protein 247
ENSG00000188100	FAM25A	family with sequence similarity 25, member A
ENSG00000188342	GTF2F2	general transcription factor IIF, polypeptide 2, 30kDa
ENSG00000188467	SLC24A5	solute carrier family 24 (sodium/potassium/calcium exchanger), member 5
ENSG00000188483	IER5L	immediate early response 5-like
ENSG00000188487	INSC	inscuteable homolog (Drosophila)
ENSG00000188779	SKOR1	SKI family transcriptional corepressor 1
ENSG00000189067	LITAF	lipopolysaccharide-induced TNF factor
ENSG00000189139	FSCB	fibrous sheath CABYR binding protein
ENSG00000189283	FHIT	fragile histidine triad
ENSG00000189319	FAM53B	family with sequence similarity 53, member B
ENSG00000196083	IL1RAP	interleukin 1 receptor accessory protein
ENSG00000196141	SPATS2L	spermatogenesis associated, serine-rich 2-like
ENSG00000196295	LOC401320	uncharacterized LOC401320
ENSG00000196396	PTPN1	protein tyrosine phosphatase, non-receptor type 1
ENSG00000196455	PIK3R4	phosphoinositide-3-kinase, regulatory subunit 4
ENSG00000196482	ESRRG	estrogen-related receptor gamma
ENSG00000196505	GDAP2	ganglioside induced differentiation associated protein 2
ENSG00000196636	ACN9	ACN9 homolog (S. cerevisiae)
ENSG00000196730	DAPK1	death-associated protein kinase 1
ENSG00000196781	TLE1	transducin-like enhancer of split 1 (E(sp1) homolog, Drosophila)
ENSG00000196932	TMEM26	transmembrane protein 26
ENSG00000196935	SRGAP1	SLIT-ROBO Rho GTPase activating protein 1
ENSG00000196937	FAM3C	family with sequence similarity 3, member C
ENSG00000196966	HIST1H3E	histone cluster 1, H3e
ENSG00000196975	ANXA4	annexin A4
ENSG00000197106	SLC6A17	solute carrier family 6 (neutral amino acid transporter), member 17
ENSG00000197275	RAD54B	RAD54 homolog B (S. cerevisiae)
ENSG00000197503	LINC00477	long intergenic non-protein coding RNA 477
ENSG00000197705	KLHL14	kelch-like family member 14
ENSG00000197746	PSAP	prosaposin
ENSG00000197851	C7orf76	chromosome 7 open reading frame 76
ENSG00000197860	SGTB	small glutamine-rich tetratricopeptide repeat (TPR)-containing, beta
ENSG00000197971	MBP	myelin basic protein
ENSG00000197980	LEKR1	leucine, glutamate and lysine rich 1
ENSG00000198053	SIRPA	signal-regulatory protein alpha
ENSG00000198108	CHSY3	chondroitin sulfate synthase 3
ENSG00000198373	WWP2	WW domain containing E3 ubiquitin protein ligase 2
ENSG00000198380	GFPT1	glutamine--fructose-6-phosphate transaminase 1
ENSG00000198477	ZNF280B	zinc finger protein 280B
ENSG00000198513	ATL1	atlastin GTPase 1
ENSG00000198561	CTNND1	catenin (cadherin-associated protein), delta 1
ENSG00000198597	ZNF536	zinc finger protein 536
ENSG00000198598	MMP17	matrix metallopeptidase 17 (membrane-inserted)
ENSG00000198604	BAZ1A	bromodomain adjacent to zinc finger domain, 1A
ENSG00000198648	STK39	serine threonine kinase 39
ENSG00000198742	SMURF1	SMAD specific E3 ubiquitin protein ligase 1
ENSG00000198825	INPP5F	inositol polyphosphate-5-phosphatase F
ENSG00000198948	MFAP3L	microfibrillar-associated protein 3-like
ENSG00000198975	MIRLET7A2	microRNA let-7a-2
ENSG00000199153	MIR30D	microRNA 30d
ENSG00000199179	MIRLET7I	microRNA let-7i
ENSG00000199381	RNU6-79P	RNA, U6 small nuclear 79, pseudogene
ENSG00000203801	LINC00222	long intergenic non-protein coding RNA 222
ENSG00000203865	ATP1A1OS	ATP1A1 opposite strand
ENSG00000203943	SAMD13	sterile alpha motif domain containing 13
ENSG00000204138	PHACTR4	phosphatase and actin regulator 4
ENSG00000204365	C10orf126	chromosome 10 open reading frame 126
ENSG00000204446	C9orf170	chromosome 9 open reading frame 170
ENSG00000204979	MS4A13	membrane-spanning 4-domains, subfamily A, member 13
ENSG00000205279	CTXN3	cortexin 3
ENSG00000205423	CNEP1R1	CTD nuclear envelope phosphatase 1 regulatory subunit 1
ENSG00000205549	C9orf92	chromosome 9 open reading frame 92
ENSG00000205981	DNAJC19	DnaJ (Hsp40) homolog, subfamily C, member 19
ENSG00000206187	RP11-1084I9.1	uncharacterized LOC100128714
ENSG00000206422	LRRC30	leucine rich repeat containing 30
ENSG00000206538	VGLL3	vestigial like 3 (Drosophila)
ENSG00000206560	ANKRD28	ankyrin repeat domain 28
ENSG00000207116	RNU6-31P	RNA, U6 small nuclear 31, pseudogene
ENSG00000207221	SNORA70E	small nucleolar RNA, H/ACA box 70E
ENSG00000207639	MIR193B	microRNA 193b
ENSG00000207649	MIR138-2	microRNA 138-2
ENSG00000207775	MIR548A1	microRNA 548a-1
ENSG00000207817	MIR614	microRNA 614
ENSG00000207944	MIR574	microRNA 574
ENSG00000207951	MIR561	microRNA 561
ENSG00000207994	MIR100	microRNA 100
ENSG00000208032	MIR548A3	microRNA 548a-3
ENSG00000211460	TSN	translin
ENSG00000211543	MIR320B1	microRNA 320b-1
ENSG00000211575	MIR760	microRNA 760
ENSG00000211590	MIR802	microRNA 802
ENSG00000212402	SNORA74B	small nucleolar RNA, H/ACA box 74B
ENSG00000213075	RPL31P11	ribosomal protein L31 pseudogene 11
ENSG00000213088	DARC	Duffy blood group, atypical chemokine receptor
ENSG00000213240	NOTCH2NL	notch 2 N-terminal like
ENSG00000213516	RBMXL1	RNA binding motif protein, X-linked-like 1
ENSG00000213585	VDAC1	voltage-dependent anion channel 1
ENSG00000214050	FBXO16	F-box protein 16
ENSG00000214146	RP11-699L21.1	uncharacterized LOC647323
ENSG00000214215	C12orf74	chromosome 12 open reading frame 74
ENSG00000214253	FIS1	fission 1 (mitochondrial outer membrane) homolog (S. cerevisiae)
ENSG00000214407	LOC152225	uncharacterized LOC152225
ENSG00000214691	AC104654.1	uncharacterized LOC388942
ENSG00000214900	C14orf182	chromosome 14 open reading frame 182
ENSG00000215018	COL28A1	collagen, type XXVIII, alpha 1
ENSG00000215262	KCNU1	potassium channel, subfamily U, member 1
ENSG00000215386	LINC00478	long intergenic non-protein coding RNA 478
ENSG00000215712	TMEM242	transmembrane protein 242
ENSG00000215866	RP11-426L16.8	uncharacterized LOC100996702
ENSG00000215869	LOC100129138	THAP domain containing, apoptosis associated protein 3 pseudogene
ENSG00000221740	SNORD93	small nucleolar RNA, C/D box 93
ENSG00000221962	TMEM14E	transmembrane protein 14E
ENSG00000223522	AC093690.1	uncharacterized LOC100505716
ENSG00000223701	RAET1E-AS1	RAET1E antisense RNA 1
ENSG00000223882	ABCC5-AS1	ABCC5 antisense RNA 1
ENSG00000223884	AC019048.1	uncharacterized LOC101929452
ENSG00000224020	MIR181A2HG	MIR181A2 host gene (non-protein coding)
ENSG00000224116	INHBA-AS1	INHBA antisense RNA 1
ENSG00000224165	DNAJC27-AS1	DNAJC27 antisense RNA 1
ENSG00000224184	AC096559.1	uncharacterized LOC100506457
ENSG00000224329	LINC00297	long intergenic non-protein coding RNA 297
ENSG00000224506	RP1-293L8.2	uncharacterized LOC643623
ENSG00000224957	AC090044.1	uncharacterized LOC101927215
ENSG00000225298	LINC00113	long intergenic non-protein coding RNA 113
ENSG00000225572	DOCK4-AS1	DOCK4 antisense RNA 1
ENSG00000225649	LOC100506474	uncharacterized LOC100506474
ENSG00000225791	TRAM2-AS1	TRAM2 antisense RNA 1 (head to head)
ENSG00000226312	CFLAR-AS1	CFLAR antisense RNA 1
ENSG00000226496	LINC00323	long intergenic non-protein coding RNA 323
ENSG00000226527	AP000289.6	uncharacterized LOC101928107
ENSG00000226869	LHFPL3-AS1	LHFPL3 antisense RNA 1
ENSG00000226913	BSN-AS2	BSN antisense RNA 2 (head to head)
ENSG00000226953	AC010890.1	uncharacterized LOC101928161
ENSG00000227036	LINC00511	long intergenic non-protein coding RNA 511
ENSG00000227110	AC087859.1	uncharacterized LOC101927394
ENSG00000227110	LMCD1-AS1	LMCD1 antisense RNA 1 (head to head)
ENSG00000227124	ZNF717	zinc finger protein 717
ENSG00000227392	HPN-AS1	HPN antisense RNA 1
ENSG00000227456	LINC00310	long intergenic non-protein coding RNA 310
ENSG00000227528	DIAPH3-AS1	DIAPH3 antisense RNA 1
ENSG00000227825	SLC9A7P1	solute carrier family 9, subfamily A (NHE7, cation proton antiporter 7), member 7 pseudogene 1
ENSG00000227964	RP5-1112F19.2	uncharacterized LOC101927678
ENSG00000229117	RPL41	ribosomal protein L41
ENSG00000229205	LINC00200	long intergenic non-protein coding RNA 200
ENSG00000229453	SPINK8	serine peptidase inhibitor, Kazal type 8 (putative)
ENSG00000230366	DSCR9	Down syndrome critical region gene 9 (non-protein coding)
ENSG00000230658	KLHL7-AS1	KLHL7 antisense RNA 1 (head to head)
ENSG00000230710	LINC00332	long intergenic non-protein coding RNA 332
ENSG00000231172	AC007099.1	uncharacterized LOC101927884
ENSG00000231213	PLSCR5	phospholipid scramblase family, member 5
ENSG00000231305	RP11-723O4.2	intraflagellar transport 122 homolog (Chlamydomonas) pseudogene
ENSG00000231672	DIRC3	disrupted in renal carcinoma 3
ENSG00000231721	LINC-PINT	long intergenic non-protein coding RNA, p53 induced transcript
ENSG00000231768	RP5-855F14.1	uncharacterized LOC100506795
ENSG00000231814	LINC00210	long intergenic non-protein coding RNA 210
ENSG00000231948	HS1BP3-IT1	HS1BP3 intronic transcript 1 (non-protein coding)
ENSG00000231989	PPP1R2P3	protein phosphatase 1, regulatory (inhibitor) subunit 2 pseudogene 3
ENSG00000232021	LEF1-AS1	LEF1 antisense RNA 1
ENSG00000232377	AC016910.1	uncharacterized LOC101928386
ENSG00000232803	RP11-93B14.5	uncharacterized LOC100127888
ENSG00000232859	LYRM9	LYR motif containing 9
ENSG00000232973	CYP1B1-AS1	CYP1B1 antisense RNA 1
ENSG00000233610	LINC00462	long intergenic non-protein coding RNA 462
ENSG00000233822	HIST1H2BN	histone cluster 1, H2bn
ENSG00000233907	FLJ31662	uncharacterized LOC440594
ENSG00000234420	ZNF37BP	zinc finger protein 37B, pseudogene
ENSG00000234456	MAGI2-AS3	MAGI2 antisense RNA 3
ENSG00000234492	RPL34-AS1	RPL34 antisense RNA 1 (head to head)
ENSG00000234545	FAM133B	family with sequence similarity 133, member B
ENSG00000235097	LINC00330	long intergenic non-protein coding RNA 330
ENSG00000235903	CPB2-AS1	CPB2 antisense RNA 1
ENSG00000236049	AC104777.2	uncharacterized LOC101929260
ENSG00000236581	STARD13-AS	STARD13 antisense RNA
ENSG00000236678	LINC00347	long intergenic non-protein coding RNA 347
ENSG00000237013	AC010987.6	uncharacterized LOC101927701
ENSG00000237222	AC090505.6	uncharacterized LOC100507391
ENSG00000238057	ZEB2-AS1	ZEB2 antisense RNA 1
ENSG00000238217	AC093590.1	uncharacterized LOC101927641
ENSG00000239704	CDRT4	CMT1A duplicated region transcript 4
ENSG00000239877	IGSF11-AS1	IGSF11 antisense RNA 1
ENSG00000239900	ADSL	adenylosuccinate lyase
ENSG00000240405	RP11-460N16.1	uncharacterized LOC101927152
ENSG00000240632	SPATA31D5P	SPATA31 subfamily D, member 5, pseudogene
ENSG00000240764	PCDHGC5	protocadherin gamma subfamily C, 5
ENSG00000241098	FLJ46066	uncharacterized LOC401103
ENSG00000242247	ARFGAP3	ADP-ribosylation factor GTPase activating protein 3
ENSG00000242265	PEG10	paternally expressed 10
ENSG00000244227	RP11-298O21.5	uncharacterized LOC646168
ENSG00000244405	ETV5	ets variant 5
ENSG00000244541	RP11-167H9.6	uncharacterized LOC101927992
ENSG00000245067	IGFBP7-AS1	IGFBP7 antisense RNA 1
ENSG00000245080	MIR3150B	microRNA 3150b
ENSG00000245522	RP11-540A21.2	uncharacterized LOC440028
ENSG00000245552	LOC101929295	uncharacterized LOC101929295
ENSG00000246174	KCTD21-AS1	KCTD21 antisense RNA 1
ENSG00000246705	H2AFJ	H2A histone family, member J
ENSG00000247240	UBL7-AS1	UBL7 antisense RNA 1 (head to head)
ENSG00000247775	RP11-67M1.1	uncharacterized LOC644248
ENSG00000248079	DPH6-AS1	DPH6 antisense RNA 1 (head to head)
ENSG00000248132	LOC101928569	uncharacterized LOC101928569
ENSG00000248197	LINC00290	long intergenic non-protein coding RNA 290
ENSG00000248323	LUCAT1	lung cancer associated transcript 1 (non-protein coding)
ENSG00000248492	ZFAT-AS1	ZFAT antisense RNA 1
ENSG00000248724	NPHP3-AS1	NPHP3 antisense RNA 1
ENSG00000248905	FMN1	formin 1
ENSG00000249378	LINC01060	long intergenic non-protein coding RNA 1060
ENSG00000249693	THEGL	theg spermatid protein-like
ENSG00000250198	RP11-143A12.3	uncharacterized LOC101929284
ENSG00000250400	LINC00977	long intergenic non-protein coding RNA 977
ENSG00000250822	LOC401177	uncharacterized LOC401177
ENSG00000251164	HULC	hepatocellular carcinoma up-regulated long non-coding RNA
ENSG00000251191	LINC00589	long intergenic non-protein coding RNA 589
ENSG00000251370	CTD-2201E9.1	uncharacterized LOC101929338
ENSG00000253276	CCDC71L	coiled-coil domain containing 71-like
ENSG00000253368	TRNP1	TMF1-regulated nuclear protein 1
ENSG00000253438	PCAT1	prostate cancer associated transcript 1 (non-protein coding)
ENSG00000253733	LZTS1-AS1	LZTS1 antisense RNA 1
ENSG00000254235	RP11-115J16.1	uncharacterized LOC157273
ENSG00000254813	RP11-252C15.1	uncharacterized LOC340357
ENSG00000254838	GVINP1	GTPase, very large interferon inducible pseudogene 1
ENSG00000254960	KIRREL3-AS2	KIRREL3 antisense RNA 2
ENSG00000255103	KIAA0754	KIAA0754
ENSG00000255302	EID1	EP300 interacting inhibitor of differentiation 1
ENSG00000255529	POLR2M	polymerase (RNA) II (DNA directed) polypeptide M
ENSG00000255906	ZNF664-FAM101A	protein FAM101A
ENSG00000256812	CAPNS2	calpain, small subunit 2
ENSG00000257103	LSM14A	LSM14A, SCD6 homolog A (S. cerevisiae)
ENSG00000257127	CLLU1	chronic lymphocytic leukemia up-regulated 1
ENSG00000257585	LINC00609	long intergenic non-protein coding RNA 609
ENSG00000257621	FLJ31306	uncharacterized LOC379025
ENSG00000258551	RP11-661P17.1	uncharacterized LOC101926928
ENSG00000258697	DUX4L6	double homeobox 4 like 6
ENSG00000259107	LINC00911	long intergenic non-protein coding RNA 911
ENSG00000260192	RP11-756H20.1	uncharacterized LOC101927460
ENSG00000260941	LINC00622	long intergenic non-protein coding RNA 622
ENSG00000261024	GS1-279B7.1	microtubule-associated protein 1 light chain 3 beta pseudogene
ENSG00000261115	TMEM178B	transmembrane protein 178B
ENSG00000261857	MIA	melanoma inhibitory activity
ENSG00000263363	MIR5702	microRNA 5702
ENSG00000263399	MIR3170	microRNA 3170
ENSG00000263583	MIR4522	microRNA 4522
ENSG00000263813	MIR3679	microRNA 3679
ENSG00000264229	RNU4ATAC	RNA, U4atac small nuclear (U12-dependent splicing)
ENSG00000264247	LINC00909	long intergenic non-protein coding RNA 909
ENSG00000264309	MIR4694	microRNA 4694
ENSG00000264390	MIR4465	microRNA 4465
ENSG00000264406	MIR548AP	microRNA 548ap
ENSG00000264698	MIR4255	microRNA 4255
ENSG00000264733	MIR4718	microRNA 4718
ENSG00000265003	MIR4780	microRNA 4780
ENSG00000265226	MIR548AI	microRNA 548ai
ENSG00000265301	MIR548AD	microRNA 548ad
ENSG00000265357	MIR4493	microRNA 4493
ENSG00000266078	MIR4432	microRNA 4432
ENSG00000266140	MIR4533	microRNA 4533
ENSG00000266149	RP11-789C17.3	uncharacterized LOC100192426
ENSG00000266150	MIR4711	microRNA 4711
ENSG00000266192	MIR1260B	microRNA 1260b
ENSG00000266502	MIR5681A	microRNA 5681a
ENSG00000267272	LINC01140	long intergenic non-protein coding RNA 1140
ENSG00000268758	EMR4P	egf-like module containing, mucin-like, hormone receptor-like 4 pseudogene
ENSG00000268894	PLCE1-AS1	PLCE1 antisense RNA 1
ENSG00000269994	LOC440173	uncharacterized LOC440173
ENSG00000271133	LOC101927811	uncharacterized LOC101927811
ENSG00000271334	LOC101926940	uncharacterized LOC101926940
ENSG00000271899	MIR4466	microRNA 4466
ENSG00000272168	CASC15	cancer susceptibility candidate 15 (non-protein coding)
ENSG00000272692	RP11-399K21.14	uncharacterized LOC101929234
	MIR4636	microRNA 4636
	ANKRD26P1	ankyrin repeat domain 26 pseudogene 1
	SEC22B	SEC22 vesicle trafficking protein homolog B (S. cerevisiae) (gene/pseudogene)
	LINC01080	long intergenic non-protein coding RNA 1080
	LINC01010	long intergenic non-protein coding RNA 1010
	LINC00111	long intergenic non-protein coding RNA 111
	GEMIN8P4	gem (nuclear organelle) associated protein 8 pseudogene 4
	FAM72C	family with sequence similarity 72, member C
	ST13P4	suppression of tumorigenicity 13 (colon carcinoma) (Hsp70 interacting protein) pseudogene 4
	RFTN2	raftlin family member 2
	CTD-2350J17.1	uncharacterized LOC101929472
	LINC00673	long intergenic non-protein coding RNA 673
	MIR569	microRNA 569
	RIMS2	regulating synaptic membrane exocytosis 2
	TM4SF1-AS1	TM4SF1 antisense RNA 1
	SLC10A1	solute carrier family 10 (sodium/bile acid cotransporter), member 1
	LINC00466	long intergenic non-protein coding RNA 466
	IRX6	iroquois homeobox 6
	MIR6073	microRNA mir-6073
	MIR6090	microRNA mir-6090
	PRICKLE2-AS2	PRICKLE2 antisense RNA 2
	LDLRAD1	low density lipoprotein receptor class A domain containing 1
	MIR4714	microRNA 4714
	CPPED1	calcineurin-like phosphoesterase domain containing 1
	AC016995.3	uncharacterized LOC101929596
	C1orf195	chromosome 1 open reading frame 195
	DUSP16	dual specificity phosphatase 16
	TMC3	transmembrane channel-like 3
	TEX41	testis expressed 41 (non-protein coding)
	IAH1	isoamyl acetate-hydrolyzing esterase 1 homolog (S. cerevisiae)
	CALU	calumenin
	ANKRD44-IT1	ANKRD44 intronic transcript 1 (non-protein coding)
	BIN3-IT1	BIN3 intronic transcript 1 (non-protein coding)
	SUMO1P1	SUMO1 pseudogene 1
	CRNDE	colorectal neoplasia differentially expressed (non-protein coding)
	LOC641515	uncharacterized LOC641515
	CHAF1B	chromatin assembly factor 1, subunit B (p60)
	GSTA7P	glutathione S-transferase alpha 7, pseudogene
	RP5-1033H22.2	uncharacterized LOC100129046
	LOC100506022	uncharacterized LOC100506022
	CNKSR3	CNKSR family member 3
	LHFPL3-AS2	LHFPL3 antisense RNA 2
	RPS10P7	ribosomal protein S10 pseudogene 7
	EDNRB-AS1	EDNRB antisense RNA 1
	MIR204	microRNA 204
	LINC01152	long intergenic non-protein coding RNA 1152
	LOC100129316	uncharacterized LOC100129316
	LOC102467655	uncharacterized LOC102467655
	MGC16025	uncharacterized LOC85009
	LINC01013	long intergenic non-protein coding RNA 1013
	MIR4706	microRNA 4706
	MIR3142	microRNA 3142
	SRRD	SRR1 domain containing
	RRP8	ribosomal RNA processing 8, methyltransferase, homolog (yeast)
	RASSF10	Ras association (RalGDS/AF-6) domain family (N-terminal) member 10
	ST6GALNAC3	ST6 (alpha-N-acetyl-neuraminyl-2,3-beta-galactosyl-1,3)-N-acetylgalactosaminide alpha-2,6-sialyltransferase 3
	PEX26	peroxisomal biogenesis factor 26
	ID4	inhibitor of DNA binding 4, dominant negative helix-loop-helix protein
	LINC00518	long intergenic non-protein coding RNA 518
	MIR1297	microRNA 1297
	LOC285768	uncharacterized LOC285768
	TMX4	thioredoxin-related transmembrane protein 4
	LOC257358	uncharacterized LOC257358
	ARL14EP	ADP-ribosylation factor-like 14 effector protein
	LOC494127	NFYC pseudogene
	UGT2B10	UDP glucuronosyltransferase 2 family, polypeptide B10
	MIR4275	microRNA 4275
	COMMD9	COMM domain containing 9
	MIR6078	microRNA mir-6078
	OTUD7B	OTU domain containing 7B
	SKP1	S-phase kinase-associated protein 1
	ISG20	interferon stimulated exonuclease gene 20kDa
	LOC100132735	uncharacterized LOC100132735
	LOC100188947	uncharacterized LOC100188947
	FLJ25363	uncharacterized LOC401082
	LRPAP1	low density lipoprotein receptor-related protein associated protein 1
	ADD3-AS1	ADD3 antisense RNA 1
	LOC102467147	uncharacterized LOC102467147
	MIR4295	microRNA 4295
	LOC100132831	A20-binding inhibitor of NF-kappaB activation 2 pseudogene
	MIR3146	microRNA 3146
	STXBP5-AS1	STXBP5 antisense RNA 1
	LINC00265	long intergenic non-protein coding RNA 265
	LINC01057	long intergenic non-protein coding RNA 1057
	MS4A2	membrane-spanning 4-domains, subfamily A, member 2
	LINC00602	long intergenic non-protein coding RNA 602
	MIR6869	microRNA mir-6869
	LOC256880	uncharacterized LOC256880
	SNORA59A	small nucleolar RNA, H/ACA box 59A
	DLGAP1-AS1	DLGAP1 antisense RNA 1
	MIR4729	microRNA 4729
	PDLIM3	PDZ and LIM domain 3
	ASB9P1	ankyrin repeat and SOCS box containing 9 pseudogene 1
	MIR604	microRNA 604
	LOC100335030	FGFR1 oncogene partner 2 pseudogene
	RP11-35G9.3	uncharacterized LOC100505549
	ST8SIA6	ST8 alpha-N-acetyl-neuraminide alpha-2,8-sialyltransferase 6
	LOC100131315	uncharacterized LOC100131315
	C4orf45	chromosome 4 open reading frame 45
	PHLDA1	pleckstrin homology-like domain, family A, member 1
	RP11-257I8.2	uncharacterized LOC101927421
	LINC01108	long intergenic non-protein coding RNA 1108
	HIST1H2BC	histone cluster 1, H2bc
	MIR4715	microRNA 4715
	BANCR	BRAF-activated non-protein coding RNA
	MIR8073	microRNA mir-8073
	STXBP5	syntaxin binding protein 5 (tomosyn)
	LOC375196	uncharacterized LOC375196
	CXCL17	chemokine (C-X-C motif) ligand 17
	LOC285000	uncharacterized LOC285000
	LINC00597	long intergenic non-protein coding RNA 597
	LINC00598	long intergenic non-protein coding RNA 598
	LOC102467223	uncharacterized LOC102467223
	REXO1L2P	REX1, RNA exonuclease 1 homolog (S. cerevisiae)-like 2 (pseudogene)
	NEU3	sialidase 3 (membrane sialidase)
	MIR4499	microRNA 4499
	LINC00581	long intergenic non-protein coding RNA 581
	RP1-257A7.4	uncharacterized LOC100130357
	PIK3CB	phosphatidylinositol-4,5-bisphosphate 3-kinase, catalytic subunit beta
	TLDC1	TBC/LysM-associated domain containing 1
	MIR5699	microRNA 5699
	MIR29A	microRNA 29a
	LINC00703	long intergenic non-protein coding RNA 703
	MIR3128	microRNA 3128
	LOC100126784	uncharacterized LOC100126784
	MIR548O2	microRNA 548o-2
	MIR4743	microRNA 4743
	SVIP	small VCP/p97-interacting protein
	LINC01030	long intergenic non-protein coding RNA 1030
	MIR548Z	microRNA 548z
	LOC102467213	uncharacterized LOC102467213
	LSM3	LSM3 homolog, U6 small nuclear RNA associated (S. cerevisiae)
	MIR548AR	microRNA 548ar
	SC5D	sterol-C5-desaturase
	LOC646736	uncharacterized LOC646736
	MIR1244-3	microRNA 1244-3
	AC022173.2	uncharacterized LOC100130880
	LOC101928505	uncharacterized LOC101928505
	DDX6	DEAD (Asp-Glu-Ala-Asp) box helicase 6
	CMC2	C-x(9)-C motif containing 2
	TECRL	trans-2,3-enoyl-CoA reductase-like
	OR9G9	olfactory receptor, family 9, subfamily G, member 9
	MIR4287	microRNA 4287
	LOC100289230	uncharacterized LOC100289230
	CELF2-AS2	CELF2 antisense RNA 2
	ALG14	ALG14, UDP-N-acetylglucosaminyltransferase subunit
	DPY19L1P1	DPY19L1 pseudogene 1
	MIR634	microRNA 634
	TFAP2A-AS1	TFAP2A antisense RNA 1
	MIR4639	microRNA 4639
	C11orf96	chromosome 11 open reading frame 96
	LOC100506124	uncharacterized LOC100506124
	OACYLP	O-acyltransferase like, pseudogene
	MBOAT1	membrane bound O-acyltransferase domain containing 1
	LOC102557615	uncharacterized LOC102557615
	LINC00578	long intergenic non-protein coding RNA 578
	AC007880.1	uncharacterized LOC101927438
	AC093375.1	uncharacterized LOC101929378
	HSP90AB4P	heat shock protein 90kDa alpha (cytosolic), class B member 4, pseudogene
	NKAIN3	Na+/K+ transporting ATPase interacting 3
	LINC00502	long intergenic non-protein coding RNA 502
	WDR3	WD repeat domain 3
	LOC389765	kinesin family member 27 pseudogene
	SNORD85	small nucleolar RNA, C/D box 85
	LIMD1	LIM domains containing 1
	MREG	melanoregulin
	MIR581	microRNA 581
	SH2B2	SH2B adaptor protein 2
	C1QTNF9B-AS1	C1QTNF9B antisense RNA 1
	PARVA	parvin, alpha
	LONP2	lon peptidase 2, peroxisomal
	MIR3922	microRNA 3922
	PRIM2	primase, DNA, polypeptide 2 (58kDa)
	ST6GALNAC5	ST6 (alpha-N-acetyl-neuraminyl-2,3-beta-galactosyl-1,3)-N-acetylgalactosaminide alpha-2,6-sialyltransferase 5
	GEMIN6	gem (nuclear organelle) associated protein 6
	SCML4	sex comb on midleg-like 4 (Drosophila)
	ARRDC3-AS1	ARRDC3 antisense RNA 1
	ISM1-AS1	ISM1 antisense RNA 1
	BRE-AS1	BRE antisense RNA 1
	AC007403.2	uncharacterized LOC101060019
	RPL19P12	ribosomal protein L19 pseudogene 12
	LINC00702	long intergenic non-protein coding RNA 702
	MTHFS	5,10-methenyltetrahydrofolate synthetase (5-formyltetrahydrofolate cyclo-ligase)
	CEBPD	CCAAT/enhancer binding protein (C/EBP), delta
	ACTN4	actinin, alpha 4
	DTHD1	death domain containing 1
	ASAP1-IT1	ASAP1 intronic transcript 1 (non-protein coding)
	CCR4	chemokine (C-C motif) receptor 4
	AVPR1A	arginine vasopressin receptor 1A
	MGC45800	uncharacterized LOC90768
	LOC102467212	uncharacterized LOC102467212
	AC004019.13	uncharacterized LOC101929372
	FAM20A	family with sequence similarity 20, member A
	FRY-AS1	FRY antisense RNA 1
	MIR3973	microRNA 3973
	C14orf169	chromosome 14 open reading frame 169
	FLJ46906	uncharacterized LOC441172
	STX7	syntaxin 7
	DTWD2	DTW domain containing 2
	RP11-1080G15.1	uncharacterized LOC100128993
	NBPF25P	neuroblastoma breakpoint family, member 25, pseudogene
	MIR548K	microRNA 548k
	PTPRG	protein tyrosine phosphatase, receptor type, G
	PRR11	proline rich 11
	NPIPA8	nuclear pore complex interacting protein family, member A8
	TMED8	transmembrane emp24 protein transport domain containing 8
	UVRAG	UV radiation resistance associated
	MIR4777	microRNA 4777
	MIR548AS	microRNA 548as
	CDH11	cadherin 11, type 2, OB-cadherin (osteoblast)
	ASAP1-IT2	ASAP1 intronic transcript 2 (non-protein coding)
	NEFL	neurofilament, light polypeptide
	MIR7150	microRNA mir-7150
	CCNL1	cyclin L1
	RP11-58E21.3	uncharacterized LOC100506499
	MIR8068	microRNA mir-8068
	HAS2-AS1	HAS2 antisense RNA 1
	TMEM135	transmembrane protein 135
	FSTL1	follistatin-like 1
	RP11-166O4.5	uncharacterized LOC101929736
	PIN4P1	protein (peptidylprolyl cis/trans isomerase) NIMA-interacting, 4 pseudogene 1
	PA2G4P4	proliferation-associated 2G4 pseudogene 4
	MIR4450	microRNA 4450
	LINC00866	long intergenic non-protein coding RNA 866
	TMEM215	transmembrane protein 215
	LOC642423	golgin A2 pseudogene
	PTDSS1	phosphatidylserine synthase 1
	ERP27	endoplasmic reticulum protein 27
	LOC339593	uncharacterized LOC339593
	POPDC3	popeye domain containing 3
	RP11-887P2.5	uncharacterized LOC101928731
	LOC102546228	uncharacterized LOC102546228
	PDGFC	platelet derived growth factor C
	SNORA14B	small nucleolar RNA, H/ACA box 14B
	RAP2B	RAP2B, member of RAS oncogene family
	RHOQ	ras homolog family member Q
	TMEM75	transmembrane protein 75
	LINC00446	long intergenic non-protein coding RNA 446
	MIR8082	microRNA mir-8082
	MIR181A1HG	MIR181A1 host gene (non-protein coding)
	MIR4446	microRNA 4446
	PTEN	phosphatase and tensin homolog
	MIR4451	microRNA 4451
	NABP1	nucleic acid binding protein 1
	GPR37	G protein-coupled receptor 37 (endothelin receptor type B-like)
	C6orf100	chromosome 6 open reading frame 100
	MIR4794	microRNA 4794

## Sheet: MAREs_AnnotGenes-Ontology
Category	Term	Count	%	PValue	Genes	List Total	Pop Hits	Pop Total	Fold Enrichment	Bonferroni	Benjamini	FDR
GOTERM_BP_FAT	GO:0006928~cell motion	62	5.158069883527454	4.168334160023387E-8	NRP2, SLC22A16, CTHRC1, IL16, HMGCR, MYLIP, PTEN, CTTNBP2, EDNRB, NDE1, GAB2, CD44, ROBO1, SEMA3C, ROBO2, CAP1, MSN, TOP2B, PTPRM, ARHGEF7, ARID5B, VASP, SLIT2, ARHGEF11, ARPC1B, TNS3, CCR4, LYST, SDCBP, FOXC1, EFNA5, LAMC1, CDK5R1, CALD1, SPOCK1, KIT, ITGAM, ALCAM, CD9, SCARB1, POU3F2, B3GNT2, CLASP2, SCG2, PLAT, IL6, KLF7, VAV3, IL8, TGFBR1, ANXA1, TNP1, GAS1, KDR, SEMA6A, EPHA7, ETS1, FYN, TGF…	840	475	13528	2.102095238095238	1.3241921068629647E-4	1.3241921068629647E-4	7.553719594266539E-5
GOTERM_BP_FAT	GO:0048870~cell motility	44	3.6605657237936775	4.147749926940317E-7	NRP2, SLC22A16, CTHRC1, CDK5R1, IL16, HMGCR, KIT, PTEN, ITGAM, CTTNBP2, EDNRB, NDE1, GAB2, CD44, ROBO1, SEMA3C, POU3F2, SCARB1, CLASP2, CAP1, MSN, TOP2B, SCG2, PLAT, IL6, VAV3, IL8, ARHGEF7, ARID5B, TGFBR1, TNP1, SLIT2, KDR, TNS3, CCR4, FYN, ETS1, LYST, SDCBP, TGFBR3, FOXC1, LAMC1, APBB2, GFRA3	840	307	13528	2.3081743446564293	0.001316872586367368	6.586532052060834E-4	7.516393516593389E-4
GOTERM_BP_FAT	GO:0051674~localization of cell	44	3.6605657237936775	4.147749926940317E-7	NRP2, SLC22A16, CTHRC1, CDK5R1, IL16, HMGCR, KIT, PTEN, ITGAM, CTTNBP2, EDNRB, NDE1, GAB2, CD44, ROBO1, SEMA3C, POU3F2, SCARB1, CLASP2, CAP1, MSN, TOP2B, SCG2, PLAT, IL6, VAV3, IL8, ARHGEF7, ARID5B, TGFBR1, TNP1, SLIT2, KDR, TNS3, CCR4, FYN, ETS1, LYST, SDCBP, TGFBR3, FOXC1, LAMC1, APBB2, GFRA3	840	307	13528	2.3081743446564293	0.001316872586367368	6.586532052060834E-4	7.516393516593389E-4
GOTERM_BP_FAT	GO:0016477~cell migration	41	3.4109816971713807	4.280499205585175E-7	NRP2, CTHRC1, CDK5R1, IL16, HMGCR, KIT, PTEN, ITGAM, CTTNBP2, EDNRB, NDE1, GAB2, CD44, ROBO1, SEMA3C, POU3F2, SCARB1, CLASP2, CAP1, MSN, TOP2B, SCG2, PLAT, IL6, VAV3, IL8, ARHGEF7, ARID5B, TGFBR1, SLIT2, KDR, TNS3, CCR4, FYN, LYST, SDCBP, TGFBR3, FOXC1, LAMC1, APBB2, GFRA3	840	276	13528	2.3923740510697034	0.0013589906232821525	4.5320223566569506E-4	7.756955791471398E-4
GOTERM_BP_FAT	GO:0032989~cellular component morphogenesis	52	4.326123128119801	5.464153339910422E-7	NRP2, ATL1, CITED1, CTNNB1, NDE1, DAB2, ROBO1, ROBO2, CAP1, TOP2B, CDH23, PTPRM, EOMES, STXBP1, SLIT2, VASP, ARHGEF11, TNNT2, HES1, EFNA5, LAMC1, IFT88, SHROOM1, BBS5, LIMS1, PARD3, CDK5R1, SSH1, PKHD1, ERBB3, SOX6, ALCAM, FIS1, CD9, B3GNT2, CLASP2, NEFL, KLF7, PTPRZ1, DOCK7, GAS1, WWTR1, CAPN3, GAS7, SEMA6A, P2RX7, EPHA7, TGFBR3, ANTXR1, APBB2, FEZ1, GFRA3	840	397	13528	2.1094398464675543	0.0017344560798425723	4.3389633732893174E-4	9.901918190946546E-4
GOTERM_BP_FAT	GO:0000902~cell morphogenesis	48	3.9933444259567388	6.964447879490889E-7	NRP2, SHROOM1, PARD3, BBS5, CDK5R1, LIMS1, SSH1, ERBB3, PKHD1, ATL1, SOX6, CITED1, CTNNB1, ALCAM, DAB2, NDE1, ROBO1, ROBO2, CLASP2, CAP1, B3GNT2, TOP2B, NEFL, CDH23, KLF7, PTPRM, PTPRZ1, STXBP1, EOMES, DOCK7, GAS1, WWTR1, GAS7, SLIT2, VASP, ARHGEF11, HES1, SEMA6A, P2RX7, EPHA7, TGFBR3, EFNA5, ANTXR1, LAMC1, APBB2, IFT88, GFRA3, FEZ1	840	356	13528	2.1714285714285713	0.002210159853799132	4.4242327430699113E-4	0.0012620675205798904
GOTERM_BP_FAT	GO:0007010~cytoskeleton organization	55	4.575707154742097	8.097842109221107E-7	RHOJ, DLC1, KIF23, CROCC, PREX1, PDLIM3, RHOQ, CTNNB1, CTTNBP2, NDE1, RANBP9, DYNLL1, PAK2, PACSIN2, GSN, CAP1, TUBG1, ACTN4, VASP, ARHGEF11, FMN1, TNNT2, RND3, SDCBP, SGCD, STMN1, GADD45A, PARVA, SHROOM1, CAV1, HAUS6, SSH1, NEK2, CALD1, SSH2, NEDD9, PFN2, SORBS1, TEKT3, SH2B2, TNKS, NEFL, FGD4, EPB41, CEP135, DOCK7, CAPN3, GAS7, BRCA1, SEMA6A, EPS8, LASP1, ANTXR1, ABL2, DNAJB6	840	436	13528	2.031564001747488	0.0025693789605815143	4.286889998879051E-4	0.001467454961712189
GOTERM_BP_FAT	GO:0007167~enzyme linked receptor protein signaling pathway	46	3.826955074875208	1.320475974364153E-6	GRIK2, ERBB3, RHOQ, FSTL1, ABI1, FKBP1A, KIT, PTEN, CITED1, SLC2A8, RGMB, FNTA, SORBS1, TIAM1, ZFYVE16, GAB1, SH2B2, PDGFC, FGF1, RAPGEF1, PLAT, PTPRJ, PTPRD, IRS2, SMAD9, PTPRG, NLK, ARID5B, TGFBR1, MYO1E, PTPRA, TGFBR2, TRIO, KDR, EPS15, DOK1, GRB10, EPHA7, EPS8, DOK5, TGFBR3, SPTBN1, FOXC1, TGFBRAP1, PTPN1, SMURF1	840	342	13528	2.166137566137566	0.004186367570221505	5.99128299533902E-4	0.0023928974195897013
GOTERM_BP_FAT	GO:0000904~cell morphogenesis involved in differentiation	35	2.9118136439267883	7.503691476261224E-6	NRP2, PARD3, CDK5R1, ERBB3, PKHD1, ATL1, CITED1, CTNNB1, ALCAM, DAB2, ROBO1, ROBO2, B3GNT2, TOP2B, NEFL, CDH23, KLF7, PTPRM, PTPRZ1, STXBP1, EOMES, DOCK7, GAS1, SLIT2, VASP, HES1, SEMA6A, EPHA7, TGFBR3, EFNA5, ANTXR1, LAMC1, APBB2, GFRA3, FEZ1	840	244	13528	2.310109289617486	0.023557405376885998	0.00297547911896634	0.013597077041116457
GOTERM_BP_FAT	GO:0030036~actin cytoskeleton organization	33	2.7454242928452577	9.905251693028094E-6	RHOJ, DLC1, SHROOM1, SSH1, PREX1, CALD1, SSH2, PDLIM3, RHOQ, NEDD9, PFN2, PAK2, SORBS1, DYNLL1, PACSIN2, GSN, SH2B2, CAP1, FGD4, ACTN4, EPB41, GAS7, CAPN3, VASP, ARHGEF11, TNNT2, FMN1, RND3, EPS8, SDCBP, ANTXR1, ABL2, PARVA	840	226	13528	2.3515802781289508	0.03097914049267203	0.0034904652785310297	0.017948459355043855
GOTERM_BP_FAT	GO:0043473~pigmentation	15	1.2479201331114809	1.0819921183409513E-5	SLC45A2, TYRP1, BBS5, HPS5, MITF, DOCK7, KIT, MREG, FIG4, CITED1, DCT, EDNRB, TYR, GFPT1, LYST	840	59	13528	4.094430992736077	0.03379096473764143	0.0034316060917439772	0.01960570018680885
GOTERM_BP_FAT	GO:0030029~actin filament-based process	34	2.828618968386023	1.4754857816418621E-5	RHOJ, DLC1, SHROOM1, SSH1, PREX1, CALD1, SSH2, PDLIM3, RHOQ, NEDD9, PFN2, PAK2, SORBS1, DYNLL1, PACSIN2, GSN, SH2B2, CAP1, FGD4, ACTN4, EPB41, MYO1E, GAS7, CAPN3, VASP, ARHGEF11, TNNT2, FMN1, RND3, EPS8, SDCBP, ANTXR1, ABL2, PARVA	840	241	13528	2.2720410985971156	0.04579479311848744	0.004252435328840898	0.02673490586585503
GOTERM_BP_FAT	GO:0048066~pigmentation during development	10	0.8319467554076538	1.5568579990248574E-5	DCT, SLC45A2, EDNRB, TYRP1, TYR, GFPT1, MITF, KIT, MREG, CITED1	840	26	13528	6.1941391941391934	0.04825845144095642	0.004113330623212286	0.028209124500522265
GOTERM_BP_FAT	GO:0006796~phosphate metabolic process	92	7.653910149750416	4.300177333065769E-5	ILKAP, DSTYK, PTEN, PRKY, CTTNBP2, PAK2, MDFIC, GAB1, ACYP2, STK39, IP6K2, PTPRJ, CDC7, PIK3CG, SRPK2, MINPP1, SGK1, PTPRM, TNIK, SGK3, LIMK2, PTPRG, PIK3CB, MYO3B, RPS6KC1, PRKCE, GRM1, DAPK1, PRKCB, MAPK1, MAP4K4, MTMR11, BMP2K, NEK9, RIPK2, CSNK1G3, ERC1, NEK7, NDUFB4, CDK5R1, SSH1, NEK2, ERBB3, SSH2, DUSP10, ABI1, ATP5G2, PXK, KIT, TRIB2, TRIB1, GALK2, STK32B, VRK2, MORC3, DUSP16, PPP3CB, DCL…	840	973	13528	1.5227524103166445	0.12769798829187684	0.010454169113601974	0.07789776239202073
GOTERM_BP_FAT	GO:0006793~phosphorus metabolic process	92	7.653910149750416	4.300177333065769E-5	ILKAP, DSTYK, PTEN, PRKY, CTTNBP2, PAK2, MDFIC, GAB1, ACYP2, STK39, IP6K2, PTPRJ, CDC7, PIK3CG, SRPK2, MINPP1, SGK1, PTPRM, TNIK, SGK3, LIMK2, PTPRG, PIK3CB, MYO3B, RPS6KC1, PRKCE, GRM1, DAPK1, PRKCB, MAPK1, MAP4K4, MTMR11, BMP2K, NEK9, RIPK2, CSNK1G3, ERC1, NEK7, NDUFB4, CDK5R1, SSH1, NEK2, ERBB3, SSH2, DUSP10, ABI1, ATP5G2, PXK, KIT, TRIB2, TRIB1, GALK2, STK32B, VRK2, MORC3, DUSP16, PPP3CB, DCL…	840	973	13528	1.5227524103166445	0.12769798829187684	0.010454169113601974	0.07789776239202073
GOTERM_BP_FAT	GO:0001568~blood vessel development	33	2.7454242928452577	5.102291890113602E-5	RTN4, NRP2, CAV1, PTEN, TCF7L2, WT1, CITED1, CDH5, GJC1, CTNNB1, ZFP36L1, CD44, ROBO1, QKI, SEMA3C, FGF1, ANGPT2, SCG2, PTPRJ, KLF5, PLAT, IL8, MYO1E, TGFBR1, TGFBR2, SLIT2, KDR, CXCL17, LAMA4, TGFBR3, ZFPM2, FOXC1, RBPJ	840	245	13528	2.1692128279883383	0.149647193286513	0.011512076550187822	0.09242173096271067
GOTERM_BP_FAT	GO:0001944~vasculature development	33	2.7454242928452577	8.16515232663093E-5	RTN4, NRP2, CAV1, PTEN, TCF7L2, WT1, CITED1, CDH5, GJC1, CTNNB1, ZFP36L1, CD44, ROBO1, QKI, SEMA3C, FGF1, ANGPT2, SCG2, PTPRJ, KLF5, PLAT, IL8, MYO1E, TGFBR1, TGFBR2, SLIT2, KDR, CXCL17, LAMA4, TGFBR3, ZFPM2, FOXC1, RBPJ	840	251	13528	2.117359134889015	0.22849913074936457	0.01714580727106685	0.14786290387823753
GOTERM_BP_FAT	GO:0030030~cell projection organization	43	3.577371048252912	9.33732836225917E-5	NRP2, PARD3, BBS5, CDK5R1, CROCC, PKHD1, ERBB3, ATL1, CDH1, RDX, PTEN, ALCAM, CD44, ROBO1, ROBO2, B3GNT2, TOP2B, NEFL, CDH23, FGD4, KLF5, KLF7, IL6, PTPRM, VAV3, PTPRZ1, STXBP1, DOCK7, GAS1, WWTR1, GAS7, SLIT2, VASP, SEMA6A, P2RX7, EPHA7, CC2D2A, SDCBP, EFNA5, APBB2, IFT88, GFRA3, FEZ1	840	368	13528	1.8818064182194618	0.25670388382809584	0.018370465850531703	0.16907289898210331
GOTERM_BP_FAT	GO:0006468~protein amino acid phosphorylation	67	5.574043261231281	1.0216780842948568E-4	DSTYK, PRKY, CTTNBP2, PAK2, MDFIC, GAB1, STK39, CDC7, PIK3CG, SRPK2, SGK1, TNIK, SGK3, LIMK2, PIK3CB, MYO3B, RPS6KC1, PRKCE, GRM1, DAPK1, PRKCB, MAPK1, MAP4K4, BMP2K, RIPK2, NEK9, CSNK1G3, ERC1, NEK7, CDK5R1, NEK2, ERBB3, ABI1, PXK, KIT, TRIB2, TRIB1, STK32B, VRK2, MORC3, DCLK2, TNKS, PIK3R4, FGD4, MAP2K2, NLK, TGFBR1, FSCB, TAOK3, PTPRA, TGFBR2, TRIO, ATM, KDR, EPHA7, P2RX7, TEX14, RPS6KA3, RPS6…	840	667	13528	1.6177197115727848	0.2771862590248715	0.018913193794313554	0.18498339879754466
GOTERM_BP_FAT	GO:0007169~transmembrane receptor protein tyrosine kinase signaling pathway	30	2.4958402662229617	1.323411014794575E-4	GRIK2, ERBB3, RHOQ, ABI1, KIT, PTEN, SLC2A8, SORBS1, TIAM1, GAB1, PDGFC, SH2B2, FGF1, RAPGEF1, PTPRJ, PLAT, IRS2, PTPRG, ARID5B, MYO1E, PTPRA, KDR, EPS15, DOK1, GRB10, EPHA7, EPS8, DOK5, FOXC1, PTPN1	840	224	13528	2.1568877551020407	0.34326553372239443	0.02308902334291585	0.23955280957985714
GOTERM_BP_FAT	GO:0007155~cell adhesion	69	5.740432612312811	1.3823888728138053E-4	DLC1, CTNNAL1, NRP2, CADM1, CTNNB1, CD44, ROBO1, COL12A1, ROBO2, MSN, CDH23, PTPRM, PIK3CB, STXBP1, PCDH7, SIRPA, NCAM1, HES1, RND3, CD36, LAMC1, ADAM12, PARVA, MIA, CDK5R1, LIMS1, PARD3, PLXNC1, PKHD1, PCDHGC5, NEDD9, COL28A1, CTNND1, SPOCK1, CDH1, PKD1L1, ITGAM, CDH5, ALCAM, IGSF11, CD9, RGMB, SORBS1, FAT3, COL6A3, FAT2, SCARB1, SCARB2, SSX2IP, THBS2, ADAM23, LPP, CNKSR3, PPFIBP1, NLGN1, CLDN22…	840	700	13528	1.587469387755102	0.35545800772140046	0.02285145344756645	0.2502158589118286
GOTERM_BP_FAT	GO:0022610~biological adhesion	69	5.740432612312811	1.43516933075697E-4	DLC1, CTNNAL1, NRP2, CADM1, CTNNB1, CD44, ROBO1, COL12A1, ROBO2, MSN, CDH23, PTPRM, PIK3CB, STXBP1, PCDH7, SIRPA, NCAM1, HES1, RND3, CD36, LAMC1, ADAM12, PARVA, MIA, CDK5R1, LIMS1, PARD3, PLXNC1, PKHD1, PCDHGC5, NEDD9, COL28A1, CTNND1, SPOCK1, CDH1, PKD1L1, ITGAM, CDH5, ALCAM, IGSF11, CD9, RGMB, SORBS1, FAT3, COL6A3, FAT2, SCARB1, SCARB2, SSX2IP, THBS2, ADAM23, LPP, CNKSR3, PPFIBP1, NLGN1, CLDN22…	840	701	13528	1.5852048094558793	0.36617730086810507	0.022541360843374436	0.259757520734194
GOTERM_BP_FAT	GO:0001570~vasculogenesis	11	0.9151414309484194	1.5355254632139296E-4	ZFP36L1, PTPRJ, CAV1, MYO1E, TGFBR2, QKI, ZFPM2, WT1, CITED1, KDR, GJC1	840	41	13528	4.320789779326365	0.3860697138549134	0.022964303119229368	0.2778975439799769
GOTERM_BP_FAT	GO:0042127~regulation of cell proliferation	75	6.239600665557404	1.9771950262706685E-4	DLC1, FTMT, RARRES1, E2F7, ARNT2, MITF, MMP7, MXI1, PTEN, CTNNB1, EDNRB, AGTR1, CTTNBP2, FNTA, CHST11, PDGFC, RARB, FGF1, CDC7, IRS2, CTBP2, PTPRM, HES1, MAPK1, TNS3, CTH, TCFL5, RIPK2, LAMC1, CAV1, ERBB3, EGLN3, ABI1, COMT, KIT, CDH5, TRIB1, RPA1, CD9, MORC3, POU3F2, SCG2, CD28, KLF5, IL6, KAT2B, IL8, GNRH1, TBX2, JARID2, TGFBR1, TGFBR2, CTLA4, ANXA1, GAS1, SPARC, SLAMF1, FOXP1, BRCA1, KDR, NOTC…	840	787	13528	1.5347612996914142	0.4664577232652062	0.028151466788627122	0.35769514775991773
GOTERM_BP_FAT	GO:0051056~regulation of small GTPase mediated signal transduction	32	2.6622296173044924	2.0259905969360477E-4	DLC1, ARFGAP3, RAP1GAP, PREX1, ASAP2, ASAP1, RABGAP1L, CYTH3, IQGAP1, TBC1D16, TIAM2, RASGRP3, TIAM1, RAPGEF6, RAPGEF5, SH2B2, RAPGEF2, AGAP1, RAPGEF1, RASA2, FGD4, VAV3, ARHGEF7, SIPA1L2, TRIO, DOCK7, TBC1D22A, ARHGEF11, USP6NL, FARP2, NOTCH2, SPATA13	840	252	13528	2.0450491307634167	0.47466673306614715	0.02759989782204164	0.3665074703103066
GOTERM_BP_FAT	GO:0048667~cell morphogenesis involved in neuron differentiation	28	2.329450915141431	2.3082848996237791E-4	NRP2, CDK5R1, PARD3, ERBB3, PKHD1, ATL1, ALCAM, ROBO1, ROBO2, B3GNT2, TOP2B, NEFL, CDH23, KLF7, PTPRM, PTPRZ1, STXBP1, DOCK7, GAS1, VASP, SLIT2, HES1, SEMA6A, EPHA7, EFNA5, APBB2, FEZ1, GFRA3	840	209	13528	2.1575757575757577	0.5197395719448171	0.030097228902032147	0.4174744594029778
GOTERM_BP_FAT	GO:0048514~blood vessel morphogenesis	28	2.329450915141431	2.6986367820678155E-4	RTN4, NRP2, CAV1, PTEN, CITED1, WT1, GJC1, CTNNB1, ZFP36L1, ROBO1, QKI, SEMA3C, FGF1, ANGPT2, SCG2, PTPRJ, KLF5, PLAT, IL8, MYO1E, TGFBR1, TGFBR2, SLIT2, KDR, CXCL17, ZFPM2, FOXC1, RBPJ	840	211	13528	2.137124802527646	0.575767069930709	0.03371736471115094	0.48791018669327446
GOTERM_BP_FAT	GO:0016050~vesicle organization	12	0.9983361064891847	2.8276884473225027E-4	EPS15, STX6, TYRP1, CAV1, P2RX7, VAV3, PICALM, LYST, ZFYVE16, STXBP1, EEA1, DTNBP1	840	52	13528	3.716483516483516	0.5928133736735045	0.033966787356483286	0.511186123539531
GOTERM_BP_FAT	GO:0043067~regulation of programmed cell death	76	6.322795341098169	3.0324924179565436E-4	DLC1, XRCC5, RTN4, MEF2C, IER3, CADM1, GRIK2, PREX1, ARNT2, MITF, PTEN, EDNRB, FNTA, DYNLL1, CD44, TIAM2, TIAM1, CHST11, RARB, NQO1, IP6K2, PIK3CG, SGK3, ACTN4, ARHGEF7, BCL2A1, IFI16, PRKCE, DAPK1, ARHGEF11, MAPK1, LYST, RIPK2, FOXC1, TNFAIP3, CDK5R1, ERBB3, APH1B, CDH1, KIT, TIMP3, TCF7L2, PRUNE2, TNFRSF19, NEFL, BMF, TRAF4, PHLDA1, SCG2, FGD4, HSPA9, SPPL3, MSH6, IL6, VAV3, GNRH1, TGFBR1, ANXA…	840	812	13528	1.507342247243725	0.6184712037088045	0.03505843980918266	0.5481142921717863
GOTERM_BP_FAT	GO:0010941~regulation of cell death	76	6.322795341098169	3.3924752727070994E-4	DLC1, XRCC5, RTN4, MEF2C, IER3, CADM1, GRIK2, PREX1, ARNT2, MITF, PTEN, EDNRB, FNTA, DYNLL1, CD44, TIAM2, TIAM1, CHST11, RARB, NQO1, IP6K2, PIK3CG, SGK3, ACTN4, ARHGEF7, BCL2A1, IFI16, PRKCE, DAPK1, ARHGEF11, MAPK1, LYST, RIPK2, FOXC1, TNFAIP3, CDK5R1, ERBB3, APH1B, CDH1, KIT, TIMP3, TCF7L2, PRUNE2, TNFRSF19, NEFL, BMF, TRAF4, PHLDA1, SCG2, FGD4, HSPA9, SPPL3, MSH6, IL6, VAV3, GNRH1, TGFBR1, ANXA…	840	815	13528	1.5017937481741161	0.6597151623122394	0.03776734176335228	0.6129913536871201
GOTERM_BP_FAT	GO:0007507~heart development	28	2.329450915141431	3.658572458072737E-4	NRP2, DLC1, BBS5, ERBB3, PDLIM3, FKBP1A, SOX6, PTEN, CTNNB1, GJC1, PPP3CB, SEMA3C, RARB, PTPRJ, TBX2, TGFBR1, TGFBR2, TEAD1, ATM, FOXP1, TNNT2, ID2, TGFBR3, ZFPM2, FOXC1, RBPJ, IFT88, CASQ2	840	215	13528	2.0973643410852714	0.6873094216440923	0.039294746994756546	0.6609223859164737
GOTERM_BP_FAT	GO:0042981~regulation of apoptosis	75	6.239600665557404	3.7017816656716304E-4	DLC1, XRCC5, RTN4, MEF2C, IER3, CADM1, GRIK2, PREX1, ARNT2, MITF, PTEN, EDNRB, FNTA, CD44, DYNLL1, TIAM2, TIAM1, CHST11, RARB, NQO1, IP6K2, PIK3CG, SGK3, ACTN4, ARHGEF7, BCL2A1, IFI16, PRKCE, DAPK1, ARHGEF11, MAPK1, LYST, RIPK2, FOXC1, TNFAIP3, CDK5R1, ERBB3, APH1B, CDH1, TIMP3, TCF7L2, PRUNE2, TNFRSF19, NEFL, BMF, TRAF4, PHLDA1, SCG2, FGD4, HSPA9, SPPL3, MSH6, IL6, VAV3, GNRH1, TGFBR1, ANXA1, TR…	840	804	13528	1.5023098791755507	0.6915741324074697	0.03845039639226544	0.6687034279314052
GOTERM_BP_FAT	GO:0007409~axonogenesis	26	2.1630615640599005	3.7234394391873194E-4	NRP2, CDK5R1, PARD3, ERBB3, PKHD1, ATL1, ALCAM, ROBO1, ROBO2, B3GNT2, TOP2B, NEFL, KLF7, PTPRM, PTPRZ1, STXBP1, DOCK7, GAS1, VASP, SLIT2, SEMA6A, EPHA7, EFNA5, APBB2, FEZ1, GFRA3	840	193	13528	2.169553417221811	0.6936898089320676	0.03744719756357284	0.6726033069994863
GOTERM_BP_FAT	GO:0016310~phosphorylation	74	6.156405990016639	5.230644848555374E-4	DSTYK, PRKY, CTTNBP2, PAK2, MDFIC, GAB1, STK39, IP6K2, CDC7, PIK3CG, SRPK2, SGK1, TNIK, SGK3, LIMK2, PIK3CB, MYO3B, RPS6KC1, PRKCE, GRM1, DAPK1, PRKCB, MAPK1, MAP4K4, BMP2K, RIPK2, NEK9, CSNK1G3, ERC1, NEK7, NDUFB4, CDK5R1, NEK2, ERBB3, ATP5G2, ABI1, PXK, KIT, TRIB2, TRIB1, GALK2, STK32B, VRK2, MORC3, DCLK2, TNKS, PIK3R4, FGD4, MAP2K2, NLK, TGFBR1, FSCB, PTPRA, TAOK3, TGFBR2, TRIO, ATM, KDR, EPHA…	840	800	13528	1.4896904761904763	0.810280882194798	0.05061804721899954	0.9436482052444739
GOTERM_BP_FAT	GO:0007242~intracellular signaling cascade	107	8.901830282861898	5.543291538342382E-4	IQGAP1, CTNNB1, AGTR1, TIAM2, TIAM1, MDFIC, GAB1, RAPGEF6, RAPGEF5, GNG2, SPRED1, RAPGEF2, RAPGEF1, PAG1, PIK3CG, PLD1, TNIK, RREB1, PIK3CB, PPARGC1A, FOXN3, FARP2, ASB9, RAD1, TNS3, MAPK1, RND3, MAP4K4, CD36, SDCBP, AKAP7, STMN1, ERC1, GRB14, CAV1, ERBB3, DUSP10, ASB11, TRH, P2RY6, DUSP16, P2RY1, FGD4, VAV3, KLF9, MAP2K2, TGFBR1, TAOK3, BRCA1, ATM, TRAF3IP2, TULP4, P2RX7, CBLB, PRKAR1A, AVPR1A, …	840	1256	13528	1.3719821049438883	0.8282288167455025	0.05198179781629464	0.9997847370527779
GOTERM_BP_FAT	GO:0032990~cell part morphogenesis	31	2.579034941763727	5.845175583569282E-4	NRP2, CDK5R1, BBS5, PARD3, ERBB3, PKHD1, ATL1, ALCAM, FIS1, ROBO1, ROBO2, B3GNT2, TOP2B, NEFL, KLF7, PTPRM, PTPRZ1, STXBP1, DOCK7, GAS1, WWTR1, GAS7, SLIT2, VASP, SEMA6A, EPHA7, EFNA5, APBB2, IFT88, GFRA3, FEZ1	840	256	13528	1.9501860119047618	0.8439463191053147	0.05316835343261794	1.0539602832891348
GOTERM_BP_FAT	GO:0031175~neuron projection development	31	2.579034941763727	5.845175583569282E-4	NRP2, CDK5R1, PARD3, ERBB3, PKHD1, ATL1, CDH1, PTEN, ALCAM, CD44, ROBO1, ROBO2, B3GNT2, TOP2B, NEFL, KLF7, IL6, PTPRM, PTPRZ1, STXBP1, DOCK7, GAS1, GAS7, SLIT2, VASP, SEMA6A, EPHA7, EFNA5, APBB2, FEZ1, GFRA3	840	256	13528	1.9501860119047618	0.8439463191053147	0.05316835343261794	1.0539602832891348
GOTERM_BP_FAT	GO:0048858~cell projection morphogenesis	30	2.4958402662229617	6.074677666356742E-4	NRP2, CDK5R1, BBS5, PARD3, ERBB3, PKHD1, ATL1, ALCAM, ROBO1, ROBO2, B3GNT2, TOP2B, NEFL, KLF7, PTPRM, PTPRZ1, STXBP1, DOCK7, GAS1, WWTR1, GAS7, SLIT2, VASP, SEMA6A, EPHA7, EFNA5, APBB2, IFT88, FEZ1, GFRA3	840	245	13528	1.97201166180758	0.8549260281196045	0.05366388510610354	1.095127555080011
GOTERM_BP_FAT	GO:0048812~neuron projection morphogenesis	27	2.246256239600666	7.201031785412981E-4	NRP2, CDK5R1, PARD3, ERBB3, PKHD1, ATL1, ALCAM, ROBO1, ROBO2, B3GNT2, TOP2B, NEFL, KLF7, PTPRM, PTPRZ1, STXBP1, DOCK7, GAS1, GAS7, VASP, SLIT2, SEMA6A, EPHA7, EFNA5, APBB2, FEZ1, GFRA3	840	213	13528	2.041448692152917	0.8985908452440058	0.06159344601340766	1.296934474462763
GOTERM_BP_FAT	GO:0007411~axon guidance	17	1.4143094841930115	8.836642484897347E-4	NRP2, KLF7, CDK5R1, PTPRM, GAS1, SLIT2, VASP, ALCAM, SEMA6A, EPHA7, ROBO1, ROBO2, EFNA5, B3GNT2, APBB2, FEZ1, GFRA3	840	107	13528	2.5587004895416112	0.9397132207429215	0.07309968603243111	1.5892914654792367
GOTERM_BP_FAT	GO:0014706~striated muscle tissue development	18	1.497504159733777	0.0010470134308579967	CAV1, TBX2, ERBB3, UTRN, RXRG, RCAN1, FKBP1A, MBNL1, PTEN, FOXP1, GJC1, TNNT2, GPHN, PPP3CB, TGFBR3, ZFPM2, FOXC1, RARB	840	119	13528	2.4360144057623048	0.9641389761161074	0.08385597215096485	1.880453001771143
GOTERM_BP_FAT	GO:0048666~neuron development	37	3.0782029950083194	0.0011118266917156685	NRP2, PARD3, CDK5R1, ERBB3, PKHD1, ATL1, CDH1, KCNIP2, PTEN, ALCAM, CD44, ROBO1, ROBO2, B3GNT2, TOP2B, NEFL, CDH23, KLF7, IL6, PTPRM, PTPRZ1, STXBP1, DOCK7, GAS1, FIG4, GAS7, SLIT2, VASP, FARP2, HES1, SEMA6A, EPHA7, EFNA5, APBB2, NTM, GFRA3, FEZ1	840	339	13528	1.7577468745610338	0.970819029991525	0.08663664635265844	1.9957536204343818
GOTERM_BP_FAT	GO:0030318~melanocyte differentiation	6	0.49916805324459235	0.0011331995556816	EDNRB, TYRP1, GFPT1, MITF, MREG, CITED1	840	14	13528	6.902040816326529	0.9727367704907209	0.08611945400383292	2.0337471535476936
GOTERM_BP_FAT	GO:0051017~actin filament bundle formation	7	0.5823627287853578	0.0013549250557705974	SHROOM1, SORBS1, ACTN4, CALD1, NEDD9, GAS7, ABL2	840	21	13528	5.368253968253969	0.9865330365171402	0.09973071923897803	2.427077952741874
GOTERM_BP_FAT	GO:0007517~muscle organ development	26	2.1630615640599005	0.0013847820252985612	MEF2C, CAV1, MEF2A, ERBB3, UTRN, FKBP1A, SOX6, PTEN, GJC1, GPHN, COL6A3, PPP3CB, RARB, TBX2, ARID5B, RXRG, RCAN1, MBNL1, CSRP2, CAPN3, FOXP1, TNNT2, SGCD, TGFBR3, FOXC1, ZFPM2	840	211	13528	1.9844730309185286	0.9877533328797546	0.09951472192793986	2.4799287089298905
GOTERM_BP_FAT	GO:0050931~pigment cell differentiation	6	0.49916805324459235	0.001613662419062018	EDNRB, TYRP1, GFPT1, MITF, MREG, CITED1	840	15	13528	6.441904761904762	0.9940878532059984	0.1124759688083884	2.88417959670374
GOTERM_BP_FAT	GO:0008286~insulin receptor signaling pathway	9	0.7487520798668885	0.0016330803849400996	SLC2A8, IRS2, GRB10, SORBS1, GAB1, PTPRA, RHOQ, SH2B2, PTPN1	840	37	13528	3.917374517374517	0.9944421139700035	0.11131480260907822	2.91840284789755
GOTERM_BP_FAT	GO:0060537~muscle tissue development	18	1.497504159733777	0.0018131636240085376	CAV1, TBX2, ERBB3, UTRN, RXRG, RCAN1, FKBP1A, MBNL1, PTEN, FOXP1, GJC1, TNNT2, GPHN, PPP3CB, TGFBR3, ZFPM2, FOXC1, RARB	840	125	13528	2.319085714285714	0.9968666402495332	0.12025707359732962	3.235248689488923
GOTERM_BP_FAT	GO:0001822~kidney development	15	1.2479201331114809	0.0023087913977997234	PKHD1, MYO1E, TGFBR1, ARID5B, NID1, WWTR1, WT1, CITED1, SLIT2, AGTR1, CD44, AQP11, FOXC1, ROBO2, RARB	840	96	13528	2.5163690476190474	0.9993532242052117	0.14755069707631985	4.102239345926173
GOTERM_BP_FAT	GO:0006664~glycolipid metabolic process	8	0.6655574043261231	0.0024359999110905527	ST8SIA6, ST3GAL5, LARGE, PSAP, ST3GAL6, GALC, KIT, NEU3	840	31	13528	4.156067588325653	0.9995686597623115	0.15199107132044865	4.323575828712956
GOTERM_BP_FAT	GO:0051297~centrosome organization	8	0.6655574043261231	0.0029540240043814847	NDE1, HAUS6, NEK2, CEP135, CROCC, GADD45A, BRCA1, CTNNB1	840	32	13528	4.026190476190476	0.9999171785342132	0.17783059665573975	5.2199369938731195
GOTERM_BP_FAT	GO:0022604~regulation of cell morphogenesis	18	1.497504159733777	0.0030038264346643724	RHOJ, RTN4, DLC1, RHOQ, PALMD, GAS7, SLIT2, MBP, KDR, TIAM1, FYN, ROBO1, TGFBR3, ROBO2, POU3F2, NEFL, CDC42EP3, FGD4	840	131	13528	2.2128680479825515	0.9999293320451632	0.17720763024810782	5.305693115398514
GOTERM_BP_FAT	GO:0042692~muscle cell differentiation	17	1.4143094841930115	0.0032511518152155963	TBX2, UTRN, RCAN1, MBNL1, SOX6, CSRP2, CAPN3, TCF7L2, FOXP1, CTNNB1, TNNT2, GPHN, AVPR1A, PPP3CB, QKI, RARB, ADAM12	840	121	13528	2.2626524990161356	0.9999678705089146	0.1869110163860025	5.73048429795775
GOTERM_BP_FAT	GO:0008285~negative regulation of cell proliferation	37	3.0782029950083194	0.003279030345321161	DLC1, CAV1, RARRES1, E2F7, ABI1, COMT, MXI1, PTEN, CDH5, TRIB1, CTTNBP2, CD9, MORC3, RARB, SCG2, IL6, PTPRM, CTBP2, KAT2B, GNRH1, IL8, JARID2, TGFBR2, CTLA4, GAS1, NOTCH2, CBLB, CTH, NME1-NME2, ETS1, EEF1E1, MYO16, TGFBR3, FABP7, UTP20, IGFBP3, KLF4	840	361	13528	1.6506265664160402	0.9999706023685879	0.18502670277029054	5.778253711238679
GOTERM_BP_FAT	GO:0016337~cell-cell adhesion	30	2.4958402662229617	0.0037807879166628314	LIMS1, CDK5R1, PARD3, CADM1, PKHD1, CTNND1, PCDHGC5, CDH1, PKD1L1, ITGAM, CDH5, CTNNB1, FAT3, CD44, ROBO1, FAT2, ROBO2, MSN, CDH23, PTPRM, PIK3CB, NLGN1, STXBP1, CLDN22, PCDH7, CDH12, NCAM1, FREM2, CDH19, CDH11	840	276	13528	1.7505175983436851	0.9999940631222439	0.20660126800734147	6.634107094200736
GOTERM_BP_FAT	GO:0009725~response to hormone stimulus	37	3.0782029950083194	0.0043412582523375915	CAV1, ERBB3, ARNT2, FHL2, RHOQ, TRH, TIMP3, PTEN, CITED1, CTNNB1, SLC2A8, CTTNBP2, SORBS1, GAB1, SH2B2, GNG2, EIF2B2, NEFL, PLD1, IL6, IRS2, KAT2B, GNRH1, TGFBR1, BCKDHB, TGFBR2, PTPRA, RCAN1, BRCA1, MAPK1, GRB10, PLA2G4A, ADCY9, PRKAR1A, AVPR1A, TGFBR3, PTPN1	840	367	13528	1.6236408459841705	0.9999990066692013	0.2295621319812272	7.5814213060317215
GOTERM_BP_FAT	GO:0043068~positive regulation of programmed cell death	42	3.494176372712146	0.004519835723400365	DLC1, CDK5R1, CADM1, GRIK2, PREX1, APH1B, TIMP3, PTEN, PRUNE2, CD44, TIAM2, DYNLL1, TIAM1, TNFRSF19, RARB, NQO1, FGD4, PHLDA1, IP6K2, MSH6, VAV3, ARHGEF7, TGFBR1, TRIO, IFI16, PRKCE, BRCA1, ATM, DAPK1, ARHGEF11, MAPK1, NOTCH2, P2RX7, EPHA7, PLA2G4A, ETS1, LYST, EEF1E1, BNIP3L, RIPK2, APBB2, IGFBP3	840	433	13528	1.5621247113163974	0.9999994381705711	0.23395914049048938	7.881342549234094
GOTERM_BP_FAT	GO:0010942~positive regulation of cell death	42	3.494176372712146	0.004864095497726394	DLC1, CDK5R1, CADM1, GRIK2, PREX1, APH1B, TIMP3, PTEN, PRUNE2, CD44, TIAM2, DYNLL1, TIAM1, TNFRSF19, RARB, NQO1, FGD4, PHLDA1, IP6K2, MSH6, VAV3, ARHGEF7, TGFBR1, TRIO, IFI16, PRKCE, BRCA1, ATM, DAPK1, ARHGEF11, MAPK1, NOTCH2, P2RX7, EPHA7, PLA2G4A, ETS1, LYST, EEF1E1, BNIP3L, RIPK2, APBB2, IGFBP3	840	435	13528	1.5549425287356324	0.9999998127716254	0.24546483492858828	8.456934217117496
GOTERM_BP_FAT	GO:0031023~microtubule organizing center organization	8	0.6655574043261231	0.005020204887459347	NDE1, HAUS6, NEK2, CEP135, CROCC, GADD45A, BRCA1, CTNNB1	840	35	13528	3.6810884353741504	0.9999998862610041	0.24837990627666007	8.716822937045643
GOTERM_BP_FAT	GO:0007098~centrosome cycle	6	0.49916805324459235	0.005079410372802014	NDE1, NEK2, CEP135, GADD45A, BRCA1, CTNNB1	840	19	13528	5.085714285714285	0.999999905853148	0.24710669520348916	8.815204949087207
GOTERM_BP_FAT	GO:0030182~neuron differentiation	42	3.494176372712146	0.0054765547991493715	NRP2, PARD3, CDK5R1, ERBB3, PKHD1, ATL1, SOX5, CDH1, KCNIP2, PTEN, ALCAM, CD44, ROBO1, ROBO2, POU3F2, B3GNT2, TOP2B, NEFL, CDH23, KLF7, IL6, PTPRM, PTPRZ1, TGFBR1, MDGA2, STXBP1, DOCK7, GAS1, FIG4, GAS7, SLIT2, VASP, FARP2, HES1, SEMA6A, EPHA7, ID4, EFNA5, APBB2, NTM, GFRA3, FEZ1	840	438	13528	1.5442922374429224	0.9999999735188477	0.25977971781779674	9.472556244201114
GOTERM_BP_FAT	GO:0019228~regulation of action potential in neuron	10	0.8319467554076538	0.005564125281101449	CD9, SERINC5, P2RX7, PLP1, GRIK2, QKI, POU3F2, EIF2B2, GJC3, MBP	840	54	13528	2.982363315696649	0.9999999799810869	0.25951555394656034	9.616898708819388
GOTERM_BP_FAT	GO:0010648~negative regulation of cell communication	27	2.246256239600666	0.006062090594050293	DLC1, CAV1, ERBB3, GRIK2, PTEN, CITED1, TRIB1, PEG10, SLC24A2, CHST11, OTUD7B, NLK, TAOK3, STXBP1, TLE1, GAS1, DKK3, P2RX7, CBLB, GRB10, RGS20, AVPR1A, SMURF1, PTPN1, TNFAIP3, IGFBP3, GRB14	840	248	13528	1.7533410138248848	0.999999995922878	0.27527613689396513	10.433570016358795
GOTERM_BP_FAT	GO:0043065~positive regulation of apoptosis	41	3.4109816971713807	0.006644210750354336	DLC1, CDK5R1, CADM1, PREX1, APH1B, TIMP3, PTEN, PRUNE2, CD44, TIAM2, DYNLL1, TIAM1, TNFRSF19, RARB, NQO1, FGD4, PHLDA1, IP6K2, MSH6, VAV3, ARHGEF7, TGFBR1, TRIO, IFI16, PRKCE, BRCA1, ATM, DAPK1, ARHGEF11, MAPK1, NOTCH2, P2RX7, EPHA7, PLA2G4A, ETS1, LYST, EEF1E1, BNIP3L, RIPK2, APBB2, IGFBP3	840	430	13528	1.5355703211517164	0.9999999993660779	0.29333480126804556	11.379417361103794
GOTERM_BP_FAT	GO:0050921~positive regulation of chemotaxis	7	0.5823627287853578	0.007762109054374693	IL6, IL8, IL16, CCR4, SLIT2, KDR, SCG2	840	29	13528	3.8873563218390803	0.9999999999822817	0.32920868625635125	13.169411672395913
GOTERM_BP_FAT	GO:0018105~peptidyl-serine phosphorylation	7	0.5823627287853578	0.007762109054374693	MORC3, GSK3B, NLK, TGFBR1, FSCB, TGFBR2, TNKS	840	29	13528	3.8873563218390803	0.9999999999822817	0.32920868625635125	13.169411672395913
GOTERM_BP_FAT	GO:0001655~urogenital system development	15	1.2479201331114809	0.007978244252078034	PKHD1, MYO1E, TGFBR1, ARID5B, NID1, WWTR1, WT1, CITED1, SLIT2, AGTR1, CD44, AQP11, FOXC1, ROBO2, RARB	840	110	13528	2.196103896103896	0.9999999999911316	0.33231915551161173	13.511525992285856
GOTERM_BP_FAT	GO:0048738~cardiac muscle tissue development	10	0.8319467554076538	0.007979748542842845	TNNT2, TBX2, TGFBR3, ZFPM2, FKBP1A, FOXC1, RARB, PTEN, FOXP1, GJC1	840	57	13528	2.825396825396825	0.9999999999911743	0.328142242529711	13.513902622841389
GOTERM_BP_FAT	GO:0010033~response to organic substance	62	5.158069883527454	0.00798507619999642	ARNT2, RHOQ, PTEN, CITED1, CTNNB1, SLC2A8, CTTNBP2, SLC1A2, FNTA, LONP2, CD44, GSN, GAB1, GNG2, EIF2B2, PLD1, IRS2, HSP90AA1, MAPK1, GRB10, CCR4, RIPK2, CAV1, PANX1, ERBB3, FHL2, CDH1, FKBP1A, COMT, EDEM3, TRH, TIMP3, TRIB1, SORBS1, PPP3CB, SCARB1, SH2B2, NEFL, IL6, KAT2B, GNRH1, TGFBR1, PTPRA, BCKDHB, TGFBR2, RCAN1, ANXA5, BRCA1, PLA2G4A, P2RX7, ADCY9, NME1-NME2, EPS8, ID2, FYN, PRKAR1A, AVPR1A,…	840	721	13528	1.3848755035994982	0.9999999999913236	0.32419623382148477	13.522319297720276
GOTERM_BP_FAT	GO:0042552~myelination	8	0.6655574043261231	0.008018957360357376	CD9, SERINC5, PLP1, QKI, POU3F2, EIF2B2, GJC3, MBP	840	38	13528	3.390476190476191	0.9999999999922158	0.3212887122421255	13.57582691518877
GOTERM_BP_FAT	GO:0040012~regulation of locomotion	22	1.8302828618968388	0.008092027979557164	DLC1, RTN4, PLD1, IRS2, IL6, PTPRM, IL16, IL8, KIT, PTEN, SLIT2, TRIB1, KDR, MAPK1, LAMA4, SERPINE2, CCR4, GAB1, TGFBR3, SCARB1, IGFBP3, SCG2	840	192	13528	1.8453373015873016	0.99999999999384	0.31973167871963915	13.691118946138259
GOTERM_BP_FAT	GO:0051270~regulation of cell motion	22	1.8302828618968388	0.008568091759969348	DLC1, RTN4, PLD1, PARD3, IRS2, IL6, PTPRM, ACTN4, PKHD1, TGFBR1, KIT, PTEN, TRIB1, KDR, MAPK1, LAMA4, SERPINE2, ETS1, GAB1, TGFBR3, SCARB1, IGFBP3	840	193	13528	1.8357759684184556	0.9999999999986596	0.331040043734375	14.438710284982037
GOTERM_BP_FAT	GO:0051130~positive regulation of cellular component organization	21	1.747088186356073	0.00861750743191402	CAV1, ACTN4, TGFBR1, RHOQ, KIT, PPARGC1A, AHR, SLIT2, CTTNBP2, PLA2G4A, P2RX7, SORBS1, TIAM1, ROBO1, GSK3B, ROBO2, TNKS, NEDD4L, PTX3, NEFL, CD28	840	181	13528	1.8685082872928178	0.999999999998856	0.32867340335509865	14.515959188011474
GOTERM_BP_FAT	GO:0032869~cellular response to insulin stimulus	11	0.9151414309484194	0.00878387295366509	SLC2A8, IRS2, GRB10, KAT2B, SORBS1, ERBB3, GAB1, PTPRA, RHOQ, SH2B2, PTPN1	840	68	13528	2.6051820728291317	0.9999999999993288	0.32996382066742846	14.775545515637923
GOTERM_BP_FAT	GO:0043069~negative regulation of programmed cell death	35	2.9118136439267883	0.009109256555227372	MEF2C, XRCC5, IER3, ERBB3, GRIK2, ARNT2, MITF, KIT, PTEN, TCF7L2, EDNRB, FNTA, CHST11, NEFL, HSPA9, SCG2, PIK3CG, IL6, SGK3, GNRH1, TGFBR1, BCL2A1, ANXA1, ANXA5, ANXA4, ATM, DAPK1, NOTCH2, NME1-NME2, GSK3B, BNIP3L, RIPK2, FOXC1, TNFAIP3, APBB2	840	359	13528	1.5701021355617455	0.9999999999997635	0.336001246579535	15.28110234941369
GOTERM_BP_FAT	GO:0060548~negative regulation of cell death	35	2.9118136439267883	0.009497610193600469	MEF2C, XRCC5, IER3, ERBB3, GRIK2, ARNT2, MITF, KIT, PTEN, TCF7L2, EDNRB, FNTA, CHST11, NEFL, HSPA9, SCG2, PIK3CG, IL6, SGK3, GNRH1, TGFBR1, BCL2A1, ANXA1, ANXA5, ANXA4, ATM, DAPK1, NOTCH2, NME1-NME2, GSK3B, BNIP3L, RIPK2, FOXC1, TNFAIP3, APBB2	840	360	13528	1.5657407407407407	0.9999999999999319	0.343665610786698	15.88078829584234
GOTERM_BP_FAT	GO:0000226~microtubule cytoskeleton organization	18	1.497504159733777	0.009589014251902315	KIF23, HAUS6, CAV1, CEP135, NEK2, CROCC, DOCK7, BRCA1, CTNNB1, CTTNBP2, NDE1, RANBP9, TEKT3, TNKS, TUBG1, STMN1, GADD45A, NEFL	840	147	13528	1.97201166180758	0.9999999999999493	0.3425147032754333	16.021347915953356
GOTERM_BP_FAT	GO:0070727~cellular macromolecule localization	39	3.24459234608985	0.009895962139012393	ARFGAP3, STX7, GRIK2, RIMS2, SEC63, CTNNB1, AP1S3, IMMP2L, LONP2, MORC3, STX18, ZFYVE16, TRAK1, DUSP16, PPP3CB, TNKS, SCG5, STAM, APPBP2, DNAJC19, HSPA9, STX6, NLGN1, IPO8, BICD1, MAPK1, MYRIP, CBLB, TOM1L1, TOM1L2, GSK3B, PEX26, IPO5, SDCBP, AKAP6, SPTBN1, SYTL2, SMURF1, RERE	840	414	13528	1.5171152518978606	0.999999999999981	0.3475194093834022	16.491745105239186
GOTERM_BP_FAT	GO:0000165~MAPKKK cascade	21	1.747088186356073	0.010251426285350779	CAV1, TNIK, PIK3CB, TGFBR1, TAOK3, DUSP10, GRM1, TRIB1, MAPK1, P2RX7, RASGRP3, MDFIC, DOK5, DUSP16, GAB1, TNFRSF19, SPRED1, RAPGEF2, FGD4, DUSP6, SCG2	840	184	13528	1.8380434782608697	0.9999999999999939	0.3537000670707722	17.033382439200373
GOTERM_BP_FAT	GO:0042438~melanin biosynthetic process	4	0.33277870216306155	0.01051767208228954	DCT, SLC45A2, TYRP1, TYR	840	8	13528	8.052380952380952	0.9999999999999974	0.35724705156497205	17.436897647008287
GOTERM_BP_FAT	GO:0050920~regulation of chemotaxis	7	0.5823627287853578	0.010829482726819755	IL6, IL8, IL16, CCR4, SLIT2, KDR, SCG2	840	31	13528	3.6365591397849464	0.999999999999999	0.3618989857426087	17.90711232061937
GOTERM_BP_FAT	GO:0051176~positive regulation of sulfur metabolic process	3	0.24958402662229617	0.011050852145346268	COMT, TCF7L2, CTNNB1	840	3	13528	16.104761904761904	0.9999999999999996	0.36403721552867896	18.239403366255004
GOTERM_BP_FAT	GO:0007178~transmembrane receptor protein serine/threonine kinase signaling pathway	14	1.1647254575707155	0.01107261928032878	SMAD9, TGFBR1, NLK, TGFBR2, FSTL1, FKBP1A, CITED1, RGMB, FNTA, ZFYVE16, SPTBN1, TGFBR3, TGFBRAP1, SMURF1	840	103	13528	2.1889967637540453	0.9999999999999996	0.3609490453068558	18.2720086525483
GOTERM_BP_FAT	GO:0046578~regulation of Ras protein signal transduction	23	1.913477537437604	0.011085565045635492	DLC1, ARFGAP3, VAV3, ARHGEF7, PREX1, ASAP2, RABGAP1L, ASAP1, TRIO, DOCK7, CYTH3, TBC1D22A, USP6NL, FARP2, ARHGEF11, TBC1D16, NOTCH2, TIAM2, TIAM1, SH2B2, AGAP1, SPATA13, FGD4	840	210	13528	1.7638548752834466	0.9999999999999996	0.35769616003325966	18.291394463384812
GOTERM_BP_FAT	GO:0051050~positive regulation of transport	24	1.9966722129783694	0.01140087989412897	MCHR1, CAV1, IRS2, IL6, CADM1, PANX1, ACTN4, ERBB3, TGFBR1, STIM2, RHOQ, CDH1, TRH, TCF7L2, PLA2G4A, P2RX7, SLC1A2, SORBS1, GSK3B, P2RY1, AVPR1A, MS4A2, NEDD4L, PTX3	840	223	13528	1.7332479180012812	0.9999999999999999	0.3622037727450893	18.762227520427246
GOTERM_BP_FAT	GO:0009719~response to endogenous stimulus	38	3.1613976705490847	0.011700695433514728	CAV1, ERBB3, ARNT2, FHL2, RHOQ, TRH, TIMP3, PTEN, CITED1, CTNNB1, SLC2A8, CTTNBP2, SLC1A2, SORBS1, GAB1, SH2B2, GNG2, EIF2B2, NEFL, PLD1, IL6, IRS2, KAT2B, GNRH1, TGFBR1, BCKDHB, PTPRA, TGFBR2, RCAN1, BRCA1, MAPK1, GRB10, PLA2G4A, ADCY9, PRKAR1A, AVPR1A, TGFBR3, PTPN1	840	405	13528	1.5110640799529689	0.9999999999999999	0.36618845425933777	19.2075383323144
GOTERM_BP_FAT	GO:0043066~negative regulation of apoptosis	34	2.828618968386023	0.01251852115620318	MEF2C, XRCC5, IER3, ERBB3, GRIK2, MITF, ARNT2, PTEN, TCF7L2, EDNRB, FNTA, CHST11, NEFL, HSPA9, SCG2, PIK3CG, IL6, SGK3, GNRH1, TGFBR1, BCL2A1, ANXA1, ANXA5, ANXA4, ATM, DAPK1, NOTCH2, NME1-NME2, GSK3B, BNIP3L, RIPK2, FOXC1, TNFAIP3, APBB2	840	354	13528	1.546785041700296	1.0	0.3825747851755532	20.410544286530875
GOTERM_BP_FAT	GO:0007015~actin filament organization	11	0.9151414309484194	0.01298197446456509	SHROOM1, PAK2, SORBS1, ACTN4, GSN, PREX1, CALD1, PDLIM3, NEDD9, GAS7, ABL2	840	72	13528	2.4604497354497354	1.0	0.3899483957323625	21.084741598596825
GOTERM_BP_FAT	GO:0008366~axon ensheathment	8	0.6655574043261231	0.013839383136478612	CD9, SERINC5, PLP1, QKI, POU3F2, EIF2B2, GJC3, MBP	840	42	13528	3.067573696145125	1.0	0.40600239839951446	22.317833991639624
GOTERM_BP_FAT	GO:0007272~ensheathment of neurons	8	0.6655574043261231	0.013839383136478612	CD9, SERINC5, PLP1, QKI, POU3F2, EIF2B2, GJC3, MBP	840	42	13528	3.067573696145125	1.0	0.40600239839951446	22.317833991639624
GOTERM_BP_FAT	GO:0007243~protein kinase cascade	35	2.9118136439267883	0.014012735779915584	CAV1, NRG3, ERBB3, DUSP10, KIT, TRIB1, RASGRP3, MDFIC, GAB1, DUSP16, TNFRSF19, SPRED1, RAPGEF2, FGF1, SCG2, FGD4, SRPK2, TNIK, PIK3CB, NLK, TGFBR1, TAOK3, GRM1, DAPK1, MAPK1, MAP4K4, DOK1, P2RX7, RPS6KA3, FYN, DOK5, RPS6KA2, TGFBR3, ERC1, DUSP6	840	370	13528	1.5234234234234232	1.0	0.40626231441383776	22.564920593123205
GOTERM_BP_FAT	GO:0034613~cellular protein localization	38	3.1613976705490847	0.014503431402197935	ARFGAP3, STX7, GRIK2, RIMS2, SEC63, CTNNB1, AP1S3, IMMP2L, LONP2, MORC3, STX18, ZFYVE16, TRAK1, DUSP16, PPP3CB, TNKS, SCG5, STAM, APPBP2, DNAJC19, HSPA9, STX6, NLGN1, IPO8, MAPK1, MYRIP, CBLB, TOM1L1, TOM1L2, GSK3B, PEX26, IPO5, SDCBP, AKAP6, SPTBN1, SYTL2, SMURF1, RERE	840	411	13528	1.489004750318619	1.0	0.413453624057868	23.260309603602703
GOTERM_BP_FAT	GO:0006582~melanin metabolic process	4	0.33277870216306155	0.015057025539052755	DCT, SLC45A2, TYRP1, TYR	840	9	13528	7.157671957671958	1.0	0.4217371973243075	24.037751008092513
GOTERM_BP_FAT	GO:0007156~homophilic cell adhesion	16	1.3311148086522462	0.015671295126672737	PTPRM, CADM1, PIK3CB, PCDHGC5, CDH1, PCDH7, CDH5, CDH12, FAT3, FREM2, ROBO1, CDH19, FAT2, ROBO2, CDH23, CDH11	840	131	13528	1.966993820428935	1.0	0.43098137372779033	24.891690481189023
GOTERM_BP_FAT	GO:0006886~intracellular protein transport	35	2.9118136439267883	0.016234340950230547	ARFGAP3, STX7, GRIK2, RIMS2, SEC63, AP1S3, IMMP2L, LONP2, STX18, ZFYVE16, TRAK1, DUSP16, PPP3CB, SCG5, STAM, APPBP2, DNAJC19, HSPA9, STX6, NLGN1, IPO8, MAPK1, MYRIP, CBLB, TOM1L1, TOM1L2, GSK3B, PEX26, IPO5, SDCBP, AKAP6, SPTBN1, SYTL2, SMURF1, RERE	840	374	13528	1.5071301247771836	1.0	0.43885443151921755	25.666446049153137
GOTERM_BP_FAT	GO:0048520~positive regulation of behavior	7	0.5823627287853578	0.01690281402725626	IL6, IL8, IL16, CCR4, SLIT2, KDR, SCG2	840	34	13528	3.315686274509804	1.0	0.44852387489416334	26.57646655451016
GOTERM_BP_FAT	GO:0008360~regulation of cell shape	9	0.7487520798668885	0.017431831010071994	RHOJ, DLC1, FYN, RHOQ, PALMD, GAS7, CDC42EP3, KDR, FGD4	840	54	13528	2.6841269841269844	1.0	0.4551665190298545	27.28916767933429
GOTERM_BP_FAT	GO:0006470~protein amino acid dephosphorylation	16	1.3311148086522462	0.017789275466437875	PTPRJ, PTPRD, ILKAP, PTPRM, SSH1, PTPRG, PTPRZ1, PTPRA, SSH2, DUSP10, PTPN13, PTEN, DUSP16, PPP3CB, PTPN1, DUSP6	840	133	13528	1.9374149659863948	1.0	0.45837147359883845	27.76701756616533
GOTERM_BP_FAT	GO:0002053~positive regulation of mesenchymal cell proliferation	5	0.4159733777038269	0.018265988824741092	IRS2, TGFBR2, GAS1, FOXP1, KDR	840	17	13528	4.7366946778711485	1.0	0.46369885628161545	28.399696183236944
GOTERM_BP_FAT	GO:0009968~negative regulation of signal transduction	23	1.913477537437604	0.019104983936804862	DLC1, CAV1, ERBB3, NLK, TAOK3, TLE1, GAS1, PTEN, CITED1, TRIB1, DKK3, PEG10, CBLB, P2RX7, GRB10, RGS20, CHST11, OTUD7B, PTPN1, SMURF1, TNFAIP3, IGFBP3, GRB14	840	221	13528	1.6760611937082526	1.0	0.47538621793745883	29.500486394049496
GOTERM_BP_FAT	GO:0006687~glycosphingolipid metabolic process	6	0.49916805324459235	0.020070733874228135	ST3GAL5, LARGE, PSAP, GALC, KIT, NEU3	840	26	13528	3.716483516483516	1.0	0.4887885884361297	30.74778429942384
GOTERM_BP_FAT	GO:0042762~regulation of sulfur metabolic process	3	0.24958402662229617	0.02119477785811539	COMT, TCF7L2, CTNNB1	840	4	13528	12.078571428571427	1.0	0.5042312851773232	32.173265143497595
GOTERM_BP_FAT	GO:0048701~embryonic cranial skeleton morphogenesis	5	0.4159733777038269	0.022358819216769056	GFPT1, TGFBR1, CHST11, TGFBR2, GAS1	840	18	13528	4.473544973544973	1.0	0.5195646016588732	33.62022257989352
GOTERM_BP_FAT	GO:0010464~regulation of mesenchymal cell proliferation	5	0.4159733777038269	0.022358819216769056	IRS2, TGFBR2, GAS1, FOXP1, KDR	840	18	13528	4.473544973544973	1.0	0.5195646016588732	33.62022257989352
GOTERM_BP_FAT	GO:0030323~respiratory tube development	13	1.0815307820299502	0.023804260174331765	TGFBR1, TGFBR2, FOXP1, KDR, CTNNB1, HES1, CTTNBP2, TNS3, ZFPM2, FGF1, IFT88, TRAF4, SIM2	840	102	13528	2.052567693744164	1.0	0.5384381907437547	35.37639479997847
GOTERM_BP_FAT	GO:0001508~regulation of action potential	10	0.8319467554076538	0.023946181067186656	CD9, SERINC5, P2RX7, PLP1, GRIK2, QKI, POU3F2, EIF2B2, GJC3, MBP	840	68	13528	2.3683473389355743	1.0	0.536999441569878	35.54643776312554
GOTERM_BP_FAT	GO:0031346~positive regulation of cell projection organization	8	0.6655574043261231	0.02472731831681602	TIAM1, ROBO1, TGFBR1, RHOQ, ROBO2, KIT, NEFL, SLIT2	840	47	13528	2.7412360688956436	1.0	0.5450587117138418	36.47481854195972
GOTERM_BP_FAT	GO:0030595~leukocyte chemotaxis	7	0.5823627287853578	0.02498467896870154	EDNRB, IL6, IL8, IL16, LYST, ITGAM, SCG2	840	37	13528	3.046846846846847	1.0	0.5452856308771287	36.777914165170685
GOTERM_BP_FAT	GO:0050927~positive regulation of positive chemotaxis	5	0.4159733777038269	0.02696666157446259	IL8, IL16, CCR4, KDR, SCG2	840	19	13528	4.238095238095238	1.0	0.5696680688205373	39.06675110051639
GOTERM_BP_FAT	GO:0048008~platelet-derived growth factor receptor signaling pathway	5	0.4159733777038269	0.02696666157446259	PLAT, MYO1E, ARID5B, PDGFC, PTEN	840	19	13528	4.238095238095238	1.0	0.5696680688205373	39.06675110051639
GOTERM_BP_FAT	GO:0050926~regulation of positive chemotaxis	5	0.4159733777038269	0.02696666157446259	IL8, IL16, CCR4, KDR, SCG2	840	19	13528	4.238095238095238	1.0	0.5696680688205373	39.06675110051639
GOTERM_BP_FAT	GO:0010604~positive regulation of macromolecule metabolic process	68	5.657237936772046	0.028265421136822688	DLC1, MEF2C, ARNT2, MITF, RHOQ, CITED1, CTNNB1, EDNRB, AGTR1, FNTA, MDFIC, PDGFC, RARB, YAP1, SAMD4A, ATF7IP, TBL1XR1, IRS2, ANAPC5, RXRG, SKP1, PPARGC1A, AHR, ARHGEF11, HES1, MAPK1, BPTF, PSMA5, ZFPM2, FOXC1, IFT88, GLIS3, CAV1, SOX5, FHL2, FKBP1A, SOX6, NHLRC1, KIT, TCF7L2, WT1, RGMB, SORBS1, TNKS, POU3F2, MYSM1, CD28, KLF5, IL6, KLF7, SMAD9, RFX4, KLF12, TGFBR1, ESRRG, TEAD1, DOCK7, AFF1, WWTR…	840	857	13528	1.2778574206812248	1.0	0.5835097152230936	40.523882105964006
GOTERM_BP_FAT	GO:0044093~positive regulation of molecular function	49	4.076539101497504	0.02906666347819363	DLC1, FTMT, AGTR1, EDNRB, FNTA, MDFIC, GAB1, MS4A2, PDGFC, CAP1, ANAPC5, ACTN4, PIK3CB, STIM2, SKP1, FSHR, GRM1, TNNT2, PSMA5, RIPK2, ERC1, PARD3, CAV1, PKHD1, CALD1, APH1B, FKBP1A, KIT, SERINC5, P2RY6, P2RY1, SCARB1, MC3R, FGD4, MSH6, IL6, VAV3, EPB41, TGFBR1, TGFBR2, DOCK7, P2RX7, NME1-NME2, ADCY9, PRKAR1A, AVPR1A, TGFBR3, IRF4, ABL2	840	586	13528	1.3466439135381116	1.0	0.5903733271956104	41.40634101319638
GOTERM_BP_FAT	GO:0051336~regulation of hydrolase activity	31	2.579034941763727	0.02936276230328658	DLC1, CAV1, ARFGAP3, ASAP2, ASAP1, RABGAP1L, CDH1, FKBP1A, PPP1R2P3, PXK, TBC1D16, AGTR1, EDNRB, P2RY6, FNTA, RASGRP3, P2RY1, RAPGEF6, MS4A2, MC3R, AGAP1, FGD4, MSH6, VAV3, DOCK7, RCAN1, TBC1D22A, USP6NL, TNNT2, AVPR1A, DNAJB6	840	337	13528	1.481446940794122	1.0	0.5906688720385804	41.72931156520588
GOTERM_BP_FAT	GO:0016311~dephosphorylation	17	1.4143094841930115	0.02943637151749464	PTPRJ, ILKAP, PTPRD, PTPRM, SSH1, PTPRG, PTPRZ1, PTPRA, SSH2, DUSP10, PTPN13, PTEN, MTMR11, DUSP16, PPP3CB, PTPN1, DUSP6	840	154	13528	1.7777983920841065	1.0	0.5881658958648447	41.80933956086522
GOTERM_BP_FAT	GO:0007163~establishment or maintenance of cell polarity	8	0.6655574043261231	0.030380181542590503	NDE1, PARD3, LIMS1, PKHD1, DOCK7, CLASP2, CAP1, ARHGEF11	840	49	13528	2.629348882410107	1.0	0.5964844176590853	42.82629226319862
GOTERM_BP_FAT	GO:0018209~peptidyl-serine modification	7	0.5823627287853578	0.03160261378074537	MORC3, GSK3B, NLK, TGFBR1, FSCB, TGFBR2, TNKS	840	39	13528	2.8905982905982905	1.0	0.6078001059683791	44.118514804965855
GOTERM_BP_FAT	GO:0060326~cell chemotaxis	7	0.5823627287853578	0.03160261378074537	EDNRB, IL6, IL8, IL16, LYST, ITGAM, SCG2	840	39	13528	2.8905982905982905	1.0	0.6078001059683791	44.118514804965855
GOTERM_BP_FAT	GO:0007049~cell cycle	62	5.158069883527454	0.03188018890557725	KIF23, GAS2L3, CROCC, E2F7, RBM7, CTNNB1, RCBTB1, NDE1, STRA8, INCENP, TUBG1, CDC7, ANAPC5, SKP1, HMGA2, FOXN3, TACC1, AHR, RAD1, MAPK1, PSMA5, CLIP1, NEK9, MAPRE2, STMN1, GADD45A, ZMYND11, EID1, PARD3, HAUS6, NEK2, PKHD1, NEDD9, TCF7L2, SESN3, RPA1, PRUNE2, PPP3CB, TNKS, HBP1, CLASP2, MSH6, KAT2B, TRNP1, IL8, CEP135, CINP, ANXA1, GAS1, GAS7, APPL2, ATM, BRCA1, RNF8, NOTCH2, GSK3B, RAD54B, ID4, C…	840	776	13528	1.2867206676485028	1.0	0.6077101802838829	44.40806776861505
GOTERM_BP_FAT	GO:0033261~regulation of S phase	5	0.4159733777038269	0.03210025809837219	CDC7, ILKAP, MYO16, GAS1, APBB2	840	20	13528	4.026190476190476	1.0	0.6069549532633662	44.636625262400365
GOTERM_BP_FAT	GO:0030100~regulation of endocytosis	9	0.7487520798668885	0.03385928742335326	CAV1, ACTN4, RAB5B, PACSIN2, ZFYVE16, SCARB1, NEDD4L, PTX3, PTEN	840	61	13528	2.376112412177986	1.0	0.6235958119687004	46.43185637607703
GOTERM_BP_FAT	GO:0010886~positive regulation of cholesterol storage	3	0.24958402662229617	0.03388293575105253	LPL, CD36, SCARB1	840	5	13528	9.662857142857142	1.0	0.6205881917579437	46.45561242074795
GOTERM_BP_FAT	GO:0008354~germ cell migration	4	0.33277870216306155	0.034315892185336094	HMGCR, TGFBR1, FOXC1, KIT	840	12	13528	5.368253968253969	1.0	0.6220992581619624	46.888785592057694
GOTERM_BP_FAT	GO:0006906~vesicle fusion	4	0.33277870216306155	0.034315892185336094	STX6, P2RX7, VAV3, EEA1	840	12	13528	5.368253968253969	1.0	0.6220992581619624	46.888785592057694
GOTERM_BP_FAT	GO:0022402~cell cycle process	47	3.9101497504159735	0.03510087009916241	KIF23, GAS2L3, HAUS6, NEK2, NEDD9, RBM7, TCF7L2, SESN3, CTNNB1, RPA1, PRUNE2, NDE1, STRA8, INCENP, PPP3CB, TNKS, HBP1, CLASP2, TUBG1, CDC7, MSH6, KAT2B, IL8, ANAPC5, CEP135, SKP1, GAS1, HMGA2, GAS7, BRCA1, ATM, FOXN3, RAD1, RNF8, NOTCH2, PSMA5, GSK3B, CLIP1, NEK9, RAD54B, MAPRE2, ID4, STMN1, APBB2, CIT, GADD45A, PA2G4P4	840	565	13528	1.3396881584492204	1.0	0.6273543737910019	47.665725736197665
GOTERM_BP_FAT	GO:0060627~regulation of vesicle-mediated transport	12	0.9983361064891847	0.03513003990611437	CAV1, PLA2G4A, ACTN4, RAB5B, PACSIN2, ZFYVE16, STXBP1, MS4A2, SCARB1, NEDD4L, PTX3, PTEN	840	96	13528	2.013095238095238	1.0	0.6244807827648649	47.694388887790495
GOTERM_BP_FAT	GO:0045892~negative regulation of transcription, DNA-dependent	32	2.6622296173044924	0.035227525525304455	MEF2C, GLIS3, EID1, ZMYND11, SOX6, WT1, CTNNB1, RARB, SIM2, ATF7IP, TBL1XR1, CTBP2, KLF12, TBX2, JARID2, ARID5B, ZHX2, TNP1, TLE1, WWTR1, SNAI2, FOXN3, FOXP1, HES1, BPTF, ID2, ZFPM2, RBPJ, HDAC8, PA2G4P4, KLF4, DNAJB6	840	356	13528	1.4476190476190478	1.0	0.6223615143441138	47.79007368428996
GOTERM_BP_FAT	GO:0009891~positive regulation of biosynthetic process	56	4.658901830282862	0.03603542844474229	MEF2C, ARNT2, MITF, RHOQ, CITED1, CTNNB1, FNTA, MDFIC, PDGFC, YAP1, RARB, SAMD4A, ATF7IP, TBL1XR1, IRS2, HSP90AA1, RXRG, PPARGC1A, AHR, ARHGEF11, HES1, MAPK1, BPTF, ZFPM2, FOXC1, GLIS3, SOX5, FHL2, SOX6, TCF7L2, WT1, RGMB, SORBS1, POU3F2, TNKS, PTX3, MYSM1, CD28, KLF5, KLF7, IL6, SMAD9, KLF12, RFX4, TGFBR1, ESRRG, TEAD1, AFF1, WWTR1, BRCA1, PLA2G4A, ETS1, GTF2F2, AVPR1A, IRF4, KLF4	840	695	13528	1.2976498800959233	1.0	0.6277243401445162	48.57671235742056
GOTERM_BP_FAT	GO:0045664~regulation of neuron differentiation	15	1.2479201331114809	0.03626258378602806	RTN4, CDK5R1, SOX5, NLGN1, SLIT2, MBP, HES1, TIAM1, ROBO1, CDK5RAP3, ID4, POU3F2, ROBO2, CDK5RAP2, NEFL	840	133	13528	1.816326530612245	1.0	0.6269747117050622	48.795863790184214
GOTERM_BP_FAT	GO:0032870~cellular response to hormone stimulus	15	1.2479201331114809	0.03626258378602806	IRS2, KAT2B, ERBB3, PTPRA, RHOQ, TRH, SLC2A8, GRB10, SORBS1, ADCY9, PRKAR1A, GAB1, SH2B2, GNG2, PTPN1	840	133	13528	1.816326530612245	1.0	0.6269747117050622	48.795863790184214
GOTERM_BP_FAT	GO:0012501~programmed cell death	50	4.159733777038269	0.03902026921372101	MEF2C, RTN4, DLC1, IER3, MEF2A, CADM1, GRIK2, PREX1, PTEN, CTNNB1, DYNLL1, TIAM2, PAK2, TIAM1, GSN, SGK1, BCL2A1, AHR, ARHGEF11, DAPK1, RIPK2, TNFAIP3, GADD45A, THOC1, PHLPP1, LITAF, ERBB3, APH1B, EGLN3, KIT, PRUNE2, FIS1, DAPL1, PEG10, TNFRSF19, BMF, TRAF4, FGD4, PHLDA1, RNF144B, IL6, VAV3, TRIO, GAS1, BRCA1, ATM, VDAC1, TRAF3IP2, SEMA6A, BNIP3L	840	611	13528	1.3179019561998286	1.0	0.651374481125546	51.3869643995563
GOTERM_BP_FAT	GO:0007264~small GTPase mediated signal transduction	28	2.329450915141431	0.03953431494083205	RHOJ, RAB5B, RHOQ, IQGAP1, RASGRP3, TIAM1, RAPGEF6, RAPGEF5, RAPGEF2, AGAP1, RAPGEF1, RAP2B, RSU1, PLD1, VAV3, ARHGEF7, MAP2K2, RREB1, ARHGEF11, FARP2, ARHGAP31, DOK1, RND3, MAPK1, SDCBP, RAB38, ARL4A, BCAR3	840	305	13528	1.4784699453551913	1.0	0.6532311608602921	51.85604895190485
GOTERM_BP_FAT	GO:0051174~regulation of phosphorus metabolic process	41	3.4109816971713807	0.03997627823929492	DLC1, PARD3, CDK5R1, CAV1, HMGCR, PKHD1, FKBP1A, PPP1R2P3, KIT, PTEN, TRIB2, TRIB1, EDNRB, DYNLL1, PAK2, MDFIC, GAB1, DUSP16, MS4A2, CDK5RAP3, PDGFC, SPRED1, FGD4, IBTK, IL6, VAV3, LIMK2, PIK3CB, TGFBR1, TGFBR2, DOCK7, RCAN1, PKIB, PRKCE, GRM1, P2RX7, ADCY9, PRKAR1A, GADD45A, IGFBP3, DUSP6	840	485	13528	1.3614334806087385	1.0	0.6543751777442728	52.255933485370974
GOTERM_BP_FAT	GO:0019220~regulation of phosphate metabolic process	41	3.4109816971713807	0.03997627823929492	DLC1, PARD3, CDK5R1, CAV1, HMGCR, PKHD1, FKBP1A, PPP1R2P3, KIT, PTEN, TRIB2, TRIB1, EDNRB, DYNLL1, PAK2, MDFIC, GAB1, DUSP16, MS4A2, CDK5RAP3, PDGFC, SPRED1, FGD4, IBTK, IL6, VAV3, LIMK2, PIK3CB, TGFBR1, TGFBR2, DOCK7, RCAN1, PKIB, PRKCE, GRM1, P2RX7, ADCY9, PRKAR1A, GADD45A, IGFBP3, DUSP6	840	485	13528	1.3614334806087385	1.0	0.6543751777442728	52.255933485370974
GOTERM_BP_FAT	GO:0040017~positive regulation of locomotion	12	0.9983361064891847	0.039978430680668677	MAPK1, IRS2, PLD1, IL6, IL8, IL16, CCR4, SCARB1, KIT, SLIT2, KDR, SCG2	840	98	13528	1.9720116618075803	1.0	0.6513971331962938	52.2578732941686
GOTERM_BP_FAT	GO:0031328~positive regulation of cellular biosynthetic process	55	4.575707154742097	0.03998210218271232	MEF2C, ARNT2, MITF, RHOQ, CITED1, CTNNB1, MDFIC, PDGFC, YAP1, RARB, SAMD4A, ATF7IP, TBL1XR1, IRS2, HSP90AA1, RXRG, PPARGC1A, AHR, ARHGEF11, HES1, MAPK1, BPTF, ZFPM2, FOXC1, GLIS3, SOX5, FHL2, SOX6, TCF7L2, WT1, RGMB, SORBS1, POU3F2, TNKS, PTX3, MYSM1, CD28, KLF5, KLF7, IL6, SMAD9, KLF12, RFX4, TGFBR1, ESRRG, TEAD1, AFF1, WWTR1, BRCA1, PLA2G4A, ETS1, GTF2F2, AVPR1A, IRF4, KLF4	840	685	13528	1.2930830726451166	1.0	0.6484563323567227	52.26118192881339
GOTERM_BP_FAT	GO:0051271~negative regulation of cell motion	9	0.7487520798668885	0.04001173857965067	DLC1, PARD3, PTPRM, ACTN4, PKHD1, TGFBR3, IGFBP3, PTEN, TRIB1	840	63	13528	2.3006802721088437	1.0	0.6457819494690147	52.287881325728215
GOTERM_BP_FAT	GO:0035023~regulation of Rho protein signal transduction	12	0.9983361064891847	0.042568866021171034	DLC1, VAV3, TIAM2, TIAM1, ARHGEF7, PREX1, TRIO, DOCK7, SPATA13, ARHGEF11, FARP2, FGD4	840	99	13528	1.9520923520923519	1.0	0.6660816669388914	54.539211063231505
GOTERM_BP_FAT	GO:0030324~lung development	12	0.9983361064891847	0.042568866021171034	HES1, TNS3, CTTNBP2, TGFBR1, TGFBR2, ZFPM2, FGF1, IFT88, FOXP1, KDR, CTNNB1, SIM2	840	99	13528	1.9520923520923519	1.0	0.6660816669388914	54.539211063231505
GOTERM_BP_FAT	GO:0051253~negative regulation of RNA metabolic process	32	2.6622296173044924	0.042784467994397744	MEF2C, GLIS3, EID1, ZMYND11, SOX6, WT1, CTNNB1, RARB, SIM2, ATF7IP, TBL1XR1, CTBP2, KLF12, TBX2, JARID2, ARID5B, ZHX2, TNP1, TLE1, WWTR1, SNAI2, FOXN3, FOXP1, HES1, BPTF, ID2, ZFPM2, RBPJ, HDAC8, PA2G4P4, KLF4, DNAJB6	840	362	13528	1.423625361746909	1.0	0.6650774687465911	54.72436954657991
GOTERM_BP_FAT	GO:0012502~induction of programmed cell death	29	2.4126455906821964	0.043204954535780604	DLC1, CADM1, GRIK2, PREX1, APH1B, PTEN, TIMP3, PRUNE2, TIAM2, TIAM1, TNFRSF19, PHLDA1, FGD4, MSH6, VAV3, ARHGEF7, TGFBR1, TRIO, IFI16, PRKCE, ATM, BRCA1, ARHGEF11, DAPK1, MAPK1, NOTCH2, ETS1, LYST, BNIP3L	840	321	13528	1.4549473371903279	1.0	0.6658668656001833	55.083434425130996
GOTERM_BP_FAT	GO:0032103~positive regulation of response to external stimulus	9	0.7487520798668885	0.043349975688508215	AGTR1, PLA2G4A, IL6, IL8, IL16, CCR4, SLIT2, KDR, SCG2	840	64	13528	2.2647321428571425	1.0	0.6642710330880137	55.20664671596334
GOTERM_BP_FAT	GO:0010828~positive regulation of glucose transport	5	0.4159733777038269	0.0439683414612966	SLC1A2, IRS2, SORBS1, ERBB3, RHOQ	840	22	13528	3.66017316017316	1.0	0.6667482654786429	55.7284453055773
GOTERM_BP_FAT	GO:0043542~endothelial cell migration	5	0.4159733777038269	0.0439683414612966	ROBO1, SCARB1, PTEN, SLIT2, SCG2	840	22	13528	3.66017316017316	1.0	0.6667482654786429	55.7284453055773
GOTERM_BP_FAT	GO:0046326~positive regulation of glucose import	5	0.4159733777038269	0.0439683414612966	SLC1A2, IRS2, SORBS1, ERBB3, RHOQ	840	22	13528	3.66017316017316	1.0	0.6667482654786429	55.7284453055773
GOTERM_BP_FAT	GO:0015031~protein transport	60	4.9916805324459235	0.04474401777139292	RAB5B, GRIK2, VPS53, AP1S3, IMMP2L, LONP2, ZFYVE16, TRAK1, MS4A2, STAM, AGAP1, DNAJC19, STX6, ACTN4, STXBP1, IPO8, PRKCB, MAPK1, MYRIP, CD36, STXBP5, LYST, IPO5, PEX26, SDCBP, AKAP6, ERC1, SNX10, SNX18, ARFGAP3, STX7, RIMS2, SEC63, STX18, DUSP16, PPP3CB, TMED10, SEC22B, TNKS, SCG5, APPBP2, EXOC2, SCG2, HSPA9, CUBN, NLGN1, TRAF3IP2, EPS15, CADPS, CBLB, TOM1L1, SCFD2, TOM1L2, GSK3B, SPTBN1, SYTL2, …	840	762	13528	1.2680914885639294	1.0	0.6704916770430601	56.37486957596346
GOTERM_BP_FAT	GO:0048863~stem cell differentiation	6	0.49916805324459235	0.04535162359097232	XRCC5, NOTCH2, MSI2, KIT, TCF7L2, KLF4	840	32	13528	3.019642857142857	1.0	0.6727586258410457	56.87498953165504
GOTERM_BP_FAT	GO:0008610~lipid biosynthetic process	29	2.4126455906821964	0.0454080969149982	ALDH8A1, HMGCR, PDSS2, FDFT1, FAR2, SERINC5, AGPAT6, NANS, ST3GAL5, ELOVL5, ETNK1, QKI, SCARB1, PTDSS1, AGPAT4, LPL, PLD1, PLP1, MOGAT1, LPGAT1, BRCA1, C9ORF3, P2RX7, PLA2G4A, LARGE, ST8SIA6, SEMA6D, MBOAT1, MGST2	840	323	13528	1.4459383753501402	1.0	0.6704645765793031	56.92119652278653
GOTERM_BP_FAT	GO:0006605~protein targeting	21	1.747088186356073	0.04550508234156301	NLGN1, IPO8, SEC63, MAPK1, IMMP2L, CBLB, LONP2, GSK3B, ZFYVE16, DUSP16, IPO5, PEX26, TRAK1, PPP3CB, SPTBN1, AKAP6, SDCBP, SMURF1, DNAJC19, RERE, HSPA9	840	215	13528	1.5730232558139536	1.0	0.6685227946162362	57.00044175788541
GOTERM_BP_FAT	GO:0043062~extracellular structure organization	17	1.4143094841930115	0.045968293682986036	MIA, CADM1, LGALS3, SPOCK2, TGFBR1, UTRN, NLGN1, CDH1, NID1, FKBP1A, CTNNB1, GPHN, COL12A1, FOXC1, LAMC1, ADAMTS3, APBB2	840	163	13528	1.6796377446684194	1.0	0.6695964116685547	57.37702822829996
GOTERM_BP_FAT	GO:0031344~regulation of cell projection organization	11	0.9151414309484194	0.04844922873275436	RTN4, TIAM1, ROBO1, TGFBR1, RHOQ, ROBO2, POU3F2, KIT, NEFL, SLIT2, MBP	840	89	13528	1.9904761904761907	1.0	0.6865528156360464	59.34153713959105
GOTERM_BP_FAT	GO:0060538~skeletal muscle organ development	9	0.7487520798668885	0.05056486166285512	GPHN, CAV1, ERBB3, UTRN, PPP3CB, RXRG, RCAN1, MBNL1, FOXP1	840	66	13528	2.196103896103896	1.0	0.6997899269526705	60.94889168598279
GOTERM_BP_FAT	GO:0007519~skeletal muscle tissue development	9	0.7487520798668885	0.05056486166285512	GPHN, CAV1, ERBB3, UTRN, PPP3CB, RXRG, RCAN1, MBNL1, FOXP1	840	66	13528	2.196103896103896	1.0	0.6997899269526705	60.94889168598279
GOTERM_BP_FAT	GO:0001709~cell fate determination	6	0.49916805324459235	0.05083085629039184	HES1, NOTCH2, TBX2, POU6F2, KLF4, CTNNB1	840	33	13528	2.928138528138528	1.0	0.6991080753849773	61.14667885623257
GOTERM_BP_FAT	GO:0046324~regulation of glucose import	6	0.49916805324459235	0.05083085629039184	SLC1A2, IRS2, GRB10, SORBS1, ERBB3, RHOQ	840	33	13528	2.928138528138528	1.0	0.6991080753849773	61.14667885623257
GOTERM_BP_FAT	GO:0048662~negative regulation of smooth muscle cell proliferation	4	0.33277870216306155	0.05179400838267423	COMT, IGFBP3, KLF4, TRIB1	840	14	13528	4.601360544217687	1.0	0.7034585928464792	61.85496604957951
GOTERM_BP_FAT	GO:0045184~establishment of protein localization	60	4.9916805324459235	0.05221874275580349	RAB5B, GRIK2, VPS53, AP1S3, IMMP2L, LONP2, ZFYVE16, TRAK1, MS4A2, STAM, AGAP1, DNAJC19, STX6, ACTN4, STXBP1, IPO8, PRKCB, MAPK1, MYRIP, CD36, STXBP5, LYST, IPO5, PEX26, SDCBP, AKAP6, ERC1, SNX10, SNX18, ARFGAP3, STX7, RIMS2, SEC63, STX18, DUSP16, PPP3CB, TMED10, SEC22B, TNKS, SCG5, APPBP2, EXOC2, SCG2, HSPA9, CUBN, NLGN1, TRAF3IP2, EPS15, CADPS, CBLB, TOM1L1, SCFD2, TOM1L2, GSK3B, SPTBN1, SYTL2, …	840	769	13528	1.2565483930893553	1.0	0.7038985009441052	62.163417370835326
GOTERM_BP_FAT	GO:0048545~response to steroid hormone stimulus	19	1.5806988352745424	0.052295762533689324	CAV1, IL6, GNRH1, TGFBR1, BCKDHB, TGFBR2, ARNT2, RCAN1, TRH, PTEN, TIMP3, CITED1, BRCA1, CTNNB1, CTTNBP2, MAPK1, PLA2G4A, AVPR1A, NEFL	840	192	13528	1.5937003968253967	1.0	0.7018780030910625	62.21909778195855
GOTERM_BP_FAT	GO:0050767~regulation of neurogenesis	17	1.4143094841930115	0.05271060540443569	RTN4, XRCC5, CDK5R1, NLGN1, SOX5, KIT, SLIT2, MBP, HES1, TIAM1, ROBO1, CDK5RAP3, ID4, POU3F2, ROBO2, CDK5RAP2, NEFL	840	166	13528	1.649282845668388	1.0	0.7022572050589397	62.51767380918384
GOTERM_BP_FAT	GO:0001656~metanephros development	7	0.5823627287853578	0.05281123712305882	CD44, ROBO2, FOXC1, RARB, WT1, SLIT2, CITED1	840	44	13528	2.562121212121212	1.0	0.7004318394877165	62.58976502060838
GOTERM_BP_FAT	GO:0006486~protein amino acid glycosylation	14	1.1647254575707155	0.05402227112197881	ST6GAL1, B3GALT2, B3GALT1, ST6GALNAC2, ST6GALNAC5, POMT2, ST6GALNAC3, ST3GAL5, ST8SIA6, LARGE, ST3GAL4, TRAK1, ST3GAL6, B3GNT2	840	128	13528	1.7614583333333331	1.0	0.7063211845931671	63.44712222294891
GOTERM_BP_FAT	GO:0070085~glycosylation	14	1.1647254575707155	0.05402227112197881	ST6GAL1, B3GALT2, B3GALT1, ST6GALNAC2, ST6GALNAC5, POMT2, ST6GALNAC3, ST3GAL5, ST8SIA6, LARGE, ST3GAL4, TRAK1, ST3GAL6, B3GNT2	840	128	13528	1.7614583333333331	1.0	0.7063211845931671	63.44712222294891
GOTERM_BP_FAT	GO:0043413~biopolymer glycosylation	14	1.1647254575707155	0.05402227112197881	ST6GAL1, B3GALT2, B3GALT1, ST6GALNAC2, ST6GALNAC5, POMT2, ST6GALNAC3, ST3GAL5, ST8SIA6, LARGE, ST3GAL4, TRAK1, ST3GAL6, B3GNT2	840	128	13528	1.7614583333333331	1.0	0.7063211845931671	63.44712222294891
GOTERM_BP_FAT	GO:0007050~cell cycle arrest	12	0.9983361064891847	0.054081766129784464	GAS2L3, NOTCH2, KAT2B, IL8, HBP1, GAS1, APBB2, GAS7, GADD45A, TCF7L2, PA2G4P4, SESN3	840	103	13528	1.8762829403606103	1.0	0.7042369013263798	63.48875983948713
GOTERM_BP_FAT	GO:0010557~positive regulation of macromolecule biosynthetic process	52	4.326123128119801	0.0543910957832355	MEF2C, ARNT2, MITF, RHOQ, CITED1, CTNNB1, FNTA, MDFIC, PDGFC, YAP1, RARB, SAMD4A, ATF7IP, TBL1XR1, IRS2, RXRG, PPARGC1A, AHR, ARHGEF11, HES1, MAPK1, BPTF, ZFPM2, FOXC1, GLIS3, SOX5, FHL2, SOX6, TCF7L2, WT1, RGMB, SORBS1, POU3F2, TNKS, MYSM1, CD28, KLF5, KLF7, IL6, SMAD9, KLF12, RFX4, TGFBR1, ESRRG, TEAD1, AFF1, WWTR1, BRCA1, ETS1, GTF2F2, IRF4, KLF4	840	654	13528	1.2805009465559924	1.0	0.7038738639941495	63.704523174438386
GOTERM_BP_FAT	GO:0035295~tube development	21	1.747088186356073	0.05533664025111284	DLC1, BBS5, TGFBR1, TGFBR2, SLIT2, VASP, FOXP1, CTNNB1, KDR, HES1, TNS3, CTTNBP2, CD44, ZFPM2, ROBO2, FOXC1, RARB, FGF1, IFT88, TRAF4, SIM2	840	220	13528	1.5372727272727273	1.0	0.7077987957414806	64.35661355752278
GOTERM_BP_FAT	GO:0010827~regulation of glucose transport	6	0.49916805324459235	0.05668051874922699	SLC1A2, IRS2, GRB10, SORBS1, ERBB3, RHOQ	840	34	13528	2.842016806722689	1.0	0.7142275246462427	65.26439123451593
GOTERM_BP_FAT	GO:0044087~regulation of cellular component biogenesis	15	1.2479201331114809	0.05742868021783436	ATF7IP, DLC1, CAV1, TGFBR1, STXBP1, RHOQ, RDX, KIT, PTEN, AHR, ARPC1B, CTTNBP2, GSN, GSK3B, SPTBN1	840	142	13528	1.7012072434607646	1.0	0.7166494701268722	65.76025657121177
GOTERM_BP_FAT	GO:0006512~ubiquitin cycle	5	0.4159733777038269	0.05797422077022346	TULP4, NEDD4L, UBE2H, SMURF1, FBXO11	840	24	13528	3.35515873015873	1.0	0.7177396703416637	66.1176045350762
GOTERM_BP_FAT	GO:0051173~positive regulation of nitrogen compound metabolic process	51	4.242928452579035	0.05858078996921541	MEF2C, ARNT2, MITF, RHOQ, CITED1, CTNNB1, MDFIC, PDGFC, YAP1, RARB, ATF7IP, TBL1XR1, HSP90AA1, RXRG, PPARGC1A, AHR, ARHGEF11, HES1, MAPK1, BPTF, ZFPM2, FOXC1, GLIS3, SOX5, FHL2, COMT, SOX6, TCF7L2, WT1, RGMB, POU3F2, TNKS, PTX3, MYSM1, KLF5, KLF7, IL6, SMAD9, KLF12, RFX4, TGFBR1, ESRRG, TEAD1, AFF1, WWTR1, BRCA1, RNF8, ETS1, GTF2F2, IRF4, KLF4	840	644	13528	1.275377107364685	1.0	0.7191965473761577	66.510790384118
GOTERM_BP_FAT	GO:0030334~regulation of cell migration	17	1.4143094841930115	0.060112907562360283	RTN4, DLC1, IRS2, IL6, PLD1, PTPRM, KIT, PTEN, TRIB1, KDR, MAPK1, LAMA4, SERPINE2, GAB1, TGFBR3, SCARB1, IGFBP3	840	169	13528	1.6200056353902508	1.0	0.7263178967009679	67.48482066501782
GOTERM_BP_FAT	GO:0006915~apoptosis	48	3.9933444259567388	0.06044970575487149	DLC1, MEF2C, PHLPP1, RTN4, IER3, MEF2A, CADM1, LITAF, GRIK2, ERBB3, PREX1, APH1B, EGLN3, PTEN, CTNNB1, PRUNE2, FIS1, DAPL1, PEG10, DYNLL1, TIAM2, PAK2, GSN, TIAM1, TNFRSF19, BMF, TRAF4, FGD4, PHLDA1, RNF144B, IL6, SGK1, VAV3, BCL2A1, TRIO, BRCA1, AHR, ATM, DAPK1, VDAC1, ARHGEF11, TRAF3IP2, SEMA6A, BNIP3L, RIPK2, TNFAIP3, GADD45A, THOC1	840	602	13528	1.2841006169909823	1.0	0.7260366627963382	67.6953181696647
GOTERM_BP_FAT	GO:0006310~DNA recombination	12	0.9983361064891847	0.06055083269588577	RPA1, DCLRE1C, XRCC5, MSH6, STRA8, NSMCE2, RAD54B, TSN, RBPJ, ATM, BRCA1, FOXP1	840	105	13528	1.8405442176870748	1.0	0.7243364090129316	67.75827033413431
GOTERM_BP_FAT	GO:0007265~Ras protein signal transduction	12	0.9983361064891847	0.06055083269588577	RHOJ, DOK1, MAPK1, PLD1, RSU1, RASGRP3, MAP2K2, RREB1, RAPGEF6, SDCBP, ARHGEF11, FARP2	840	105	13528	1.8405442176870748	1.0	0.7243364090129316	67.75827033413431
GOTERM_BP_FAT	GO:0043627~response to estrogen stimulus	12	0.9983361064891847	0.06055083269588577	CTTNBP2, MAPK1, CAV1, TGFBR1, ARNT2, TGFBR2, RCAN1, TIMP3, PTEN, BRCA1, CITED1, CTNNB1	840	105	13528	1.8405442176870748	1.0	0.7243364090129316	67.75827033413431
GOTERM_BP_FAT	GO:0008219~cell death	56	4.658901830282862	0.061217184196975694	DLC1, MEF2C, RTN4, IER3, MEF2A, CADM1, ATL1, GRIK2, PREX1, PTEN, CTNNB1, SETX, DYNLL1, TIAM2, PAK2, GSN, TIAM1, SGK1, BCL2A1, AHR, DAPK1, ARHGEF11, RIPK2, TNFAIP3, GADD45A, THOC1, PHLPP1, LITAF, ERBB3, APH1B, EGLN3, KIT, PRUNE2, FIS1, DAPL1, PEG10, TNFRSF19, PPP2R2B, BMF, TRAF4, FGD4, PHLDA1, RNF144B, IL6, PLP1, VAV3, TRIO, GAS1, FIG4, ATM, BRCA1, VDAC1, TRAF3IP2, SEMA6A, P2RX7, BNIP3L	840	719	13528	1.2543347241539176	1.0	0.726048494096214	68.17018934437141
GOTERM_BP_FAT	GO:0050770~regulation of axonogenesis	8	0.6655574043261231	0.06139965221709112	RTN4, TIAM1, ROBO1, ROBO2, POU3F2, NEFL, SLIT2, MBP	840	57	13528	2.2603174603174607	1.0	0.7248566054448832	68.2821155248652
GOTERM_BP_FAT	GO:0050900~leukocyte migration	8	0.6655574043261231	0.06139965221709112	EDNRB, IL6, IL8, IL16, LYST, MSN, ITGAM, SCG2	840	57	13528	2.2603174603174607	1.0	0.7248566054448832	68.2821155248652
GOTERM_BP_FAT	GO:0031290~retinal ganglion cell axon guidance	4	0.33277870216306155	0.061851973761469996	EPHA7, PTPRM, EFNA5, SLIT2	840	15	13528	4.294603174603175	1.0	0.7252785240650055	68.5579690255156
GOTERM_BP_FAT	GO:0006643~membrane lipid metabolic process	10	0.8319467554076538	0.0627863642980604	P2RX7, ST8SIA6, ST3GAL5, LARGE, PSAP, ST3GAL6, GALC, KIT, NSMAF, NEU3	840	81	13528	1.9882422104644326	1.0	0.7285174324400414	69.12065636445945
GOTERM_BP_FAT	GO:0008104~protein localization	67	5.574043261231281	0.06303415388647719	RAB5B, CROCC, GRIK2, VPS53, MXI1, CTNNB1, AP1S3, IMMP2L, LONP2, ZFYVE16, TRAK1, MS4A2, STAM, AGAP1, DNAJC19, STX6, ACTN4, STXBP1, IPO8, PRKCB, MAPK1, MYRIP, CD36, STXBP5, LYST, IPO5, PEX26, SDCBP, AKAP6, AKAP7, ERC1, SNX10, SNX18, ARFGAP3, CAV1, STX7, RDX, RIMS2, SEC63, MORC3, STX18, DUSP16, PPP3CB, TMED10, SEC22B, TNKS, SCG5, APPBP2, EXOC2, SCG2, HSPA9, CUBN, NLGN1, TRAF3IP2, EPS15, CADPS, CBLB,…	840	882	13528	1.223377605010258	1.0	0.7277244004256578	69.26827062196341
GOTERM_BP_FAT	GO:0050795~regulation of behavior	7	0.5823627287853578	0.06323745154751394	IL6, IL8, IL16, CCR4, SLIT2, KDR, SCG2	840	46	13528	2.4507246376811596	1.0	0.7266817414325653	69.38888181275874
GOTERM_BP_FAT	GO:0045834~positive regulation of lipid metabolic process	7	0.5823627287853578	0.06323745154751394	AGTR1, PLA2G4A, IRS2, VAV3, SORBS1, AVPR1A, PPARGC1A	840	46	13528	2.4507246376811596	1.0	0.7266817414325653	69.38888181275874
GOTERM_BP_FAT	GO:0006917~induction of apoptosis	28	2.329450915141431	0.06424947000322385	DLC1, CADM1, PREX1, APH1B, PTEN, TIMP3, PRUNE2, TIAM2, TIAM1, TNFRSF19, PHLDA1, FGD4, MSH6, VAV3, ARHGEF7, TGFBR1, TRIO, IFI16, PRKCE, ATM, BRCA1, ARHGEF11, DAPK1, MAPK1, NOTCH2, ETS1, LYST, BNIP3L	840	320	13528	1.4091666666666667	1.0	0.7302855452298371	69.98266067800962
GOTERM_BP_FAT	GO:0032092~positive regulation of protein binding	3	0.24958402662229617	0.065510556251212	EPB41, CALD1, FKBP1A	840	7	13528	6.902040816326529	1.0	0.7351918875968461	70.70735062122908
GOTERM_BP_FAT	GO:0050772~positive regulation of axonogenesis	5	0.4159733777038269	0.06576766064634605	TIAM1, ROBO1, ROBO2, NEFL, SLIT2	840	25	13528	3.220952380952381	1.0	0.7344524042045317	70.8530540067297
GOTERM_BP_FAT	GO:0010948~negative regulation of cell cycle process	5	0.4159733777038269	0.06576766064634605	MYO16, GAS1, APBB2, ATM, BRCA1	840	25	13528	3.220952380952381	1.0	0.7344524042045317	70.8530540067297
GOTERM_BP_FAT	GO:0009101~glycoprotein biosynthetic process	16	1.3311148086522462	0.06587152399515211	ST6GAL1, B3GALT2, B3GALT1, ST6GALNAC2, ST6GALNAC5, POMT2, ST6GALNAC3, ST3GAL5, ST8SIA6, LARGE, ST3GAL4, CHST11, TRAK1, ST3GAL6, B3GNT2, PHLDA1	840	158	13528	1.6308619650391805	1.0	0.7328726730994006	70.91171989858532
GOTERM_BP_FAT	GO:0045893~positive regulation of transcription, DNA-dependent	39	3.24459234608985	0.06692415841759766	MEF2C, GLIS3, ARNT2, MITF, SOX5, FHL2, RHOQ, SOX6, TCF7L2, WT1, CTNNB1, MDFIC, POU3F2, YAP1, RARB, MYSM1, ATF7IP, TBL1XR1, KLF7, IL6, KLF12, RFX4, ESRRG, RXRG, TEAD1, AFF1, WWTR1, PPARGC1A, BRCA1, AHR, ARHGEF11, HES1, BPTF, ETS1, GTF2F2, ZFPM2, FOXC1, IRF4, KLF4	840	477	13528	1.3167415393830488	1.0	0.7365098081705252	71.50002561007706
GOTERM_BP_FAT	GO:0000122~negative regulation of transcription from RNA polymerase II promoter	24	1.9966722129783694	0.06694833853332756	MEF2C, ATF7IP, TBL1XR1, EID1, GLIS3, ZMYND11, KLF12, TBX2, JARID2, ZHX2, TLE1, SOX6, WWTR1, SNAI2, WT1, FOXP1, CTNNB1, HES1, BPTF, ID2, ZFPM2, RARB, HDAC8, SIM2	840	266	13528	1.453061224489796	1.0	0.7345159544350728	71.51340659377465
GOTERM_BP_FAT	GO:0016265~death	56	4.658901830282862	0.06741326821496973	DLC1, MEF2C, RTN4, IER3, MEF2A, CADM1, ATL1, GRIK2, PREX1, PTEN, CTNNB1, SETX, DYNLL1, TIAM2, PAK2, GSN, TIAM1, SGK1, BCL2A1, AHR, DAPK1, ARHGEF11, RIPK2, TNFAIP3, GADD45A, THOC1, PHLPP1, LITAF, ERBB3, APH1B, EGLN3, KIT, PRUNE2, FIS1, DAPL1, PEG10, TNFRSF19, PPP2R2B, BMF, TRAF4, FGD4, PHLDA1, RNF144B, IL6, PLP1, VAV3, TRIO, GAS1, FIG4, ATM, BRCA1, VDAC1, TRAF3IP2, SEMA6A, P2RX7, BNIP3L	840	724	13528	1.2456721915285451	1.0	0.7349246109179044	71.76954163275413
GOTERM_BP_FAT	GO:0016051~carbohydrate biosynthetic process	12	0.9983361064891847	0.06750854661789821	GCNT2, NANS, ST8SIA6, B3GALT2, B3GALT1, GFPT1, PGM1, CHST11, GYG2, B3GNT2, PPARGC1A, ACN9	840	107	13528	1.8061415220293724	1.0	0.7333370857596295	71.82176223198762
GOTERM_BP_FAT	GO:0045941~positive regulation of transcription	45	3.743760399334443	0.06755677626050857	MEF2C, GLIS3, ARNT2, MITF, SOX5, FHL2, RHOQ, SOX6, TCF7L2, CITED1, WT1, CTNNB1, RGMB, MDFIC, POU3F2, YAP1, RARB, MYSM1, KLF5, ATF7IP, TBL1XR1, KLF7, IL6, SMAD9, KLF12, RFX4, TGFBR1, ESRRG, RXRG, TEAD1, AFF1, WWTR1, PPARGC1A, BRCA1, AHR, ARHGEF11, HES1, MAPK1, BPTF, ETS1, GTF2F2, ZFPM2, FOXC1, IRF4, KLF4	840	564	13528	1.2849544072948327	1.0	0.7315044964591125	71.84816133770346
GOTERM_BP_FAT	GO:0007017~microtubule-based process	23	1.913477537437604	0.06855494803096307	KIF23, HAUS6, CAV1, CEP135, NEK2, CROCC, DOCK7, KIF3C, BRCA1, CTNNB1, CTTNBP2, NDE1, RANBP9, DYNLL1, KIF6, TEKT3, TNKS, TUBG1, STMN1, DYNLRB2, KIF21A, GADD45A, NEFL	840	253	13528	1.464069264069264	1.0	0.734781848578645	72.38930527559795
GOTERM_BP_FAT	GO:0010741~negative regulation of protein kinase cascade	6	0.49916805324459235	0.06948877195298478	CAV1, P2RX7, TAOK3, OTUD7B, TNFAIP3, PTEN	840	36	13528	2.684126984126984	1.0	0.7376502916595371	72.88665312709732
GOTERM_BP_FAT	GO:0008283~cell proliferation	36	2.995008319467554	0.06979457001316688	XRCC5, MIA, ZMYND11, CDK5R1, SPOCK1, FKBP1A, KIT, TCF7L2, PTEN, CITED1, ITGAM, CTNNB1, ISG20, DAB2, NDE1, GAB1, MS4A2, POU3F2, SCARB1, GNG2, IRS2, IFI16, CSRP2, APPL2, LRPAP1, EPS15, P2RX7, EPS8, FYN, TGFBR3, RIPK2, FOXC1, ID4, MAPRE2, FABP7, PA2G4P4	840	436	13528	1.329750982961992	1.0	0.7372017274509228	73.04767071858602
GOTERM_BP_FAT	GO:0060541~respiratory system development	12	0.9983361064891847	0.07117305227979408	HES1, TNS3, CTTNBP2, TGFBR1, TGFBR2, ZFPM2, FGF1, IFT88, FOXP1, KDR, CTNNB1, SIM2	840	108	13528	1.7894179894179894	1.0	0.7422791203888409	73.76235858613595
GOTERM_BP_FAT	GO:0007254~JNK cascade	8	0.6655574043261231	0.07137449037402832	TNIK, MDFIC, TAOK3, GAB1, DUSP10, TNFRSF19, TRIB1, FGD4	840	59	13528	2.1836965294592416	1.0	0.7412895979826477	73.86528431415
GOTERM_BP_FAT	GO:0006935~chemotaxis	16	1.3311148086522462	0.07177030738854748	NRP2, IL6, PLD1, IL16, IL8, PIK3CB, ITGAM, SLIT2, MAPK1, EDNRB, CXCL17, CCR4, ROBO1, LYST, ROBO2, SCG2	840	160	13528	1.6104761904761906	1.0	0.7412931549679159	74.06641860912782
GOTERM_BP_FAT	GO:0042330~taxis	16	1.3311148086522462	0.07177030738854748	NRP2, IL6, PLD1, IL16, IL8, PIK3CB, ITGAM, SLIT2, MAPK1, EDNRB, CXCL17, CCR4, ROBO1, LYST, ROBO2, SCG2	840	160	13528	1.6104761904761906	1.0	0.7412931549679159	74.06641860912782
GOTERM_BP_FAT	GO:0010628~positive regulation of gene expression	46	3.826955074875208	0.07205700786129293	MEF2C, GLIS3, ARNT2, MITF, SOX5, FHL2, RHOQ, SOX6, KIT, TCF7L2, CITED1, WT1, CTNNB1, RGMB, MDFIC, POU3F2, YAP1, RARB, MYSM1, ATF7IP, KLF5, TBL1XR1, KLF7, IL6, SMAD9, KLF12, RFX4, TGFBR1, ESRRG, RXRG, TEAD1, AFF1, WWTR1, PPARGC1A, BRCA1, AHR, ARHGEF11, HES1, MAPK1, BPTF, ETS1, GTF2F2, ZFPM2, FOXC1, IRF4, KLF4	840	581	13528	1.2750758134579132	1.0	0.7407477759958828	74.21119107621136
GOTERM_BP_FAT	GO:0007090~regulation of S phase of mitotic cell cycle	4	0.33277870216306155	0.07273933810311328	ILKAP, MYO16, GAS1, APBB2	840	16	13528	4.026190476190476	1.0	0.7421894144472347	74.55267593281782
GOTERM_BP_FAT	GO:0042325~regulation of phosphorylation	38	3.1613976705490847	0.0733592159582544	PARD3, CDK5R1, CAV1, HMGCR, PKHD1, FKBP1A, KIT, PTEN, TRIB2, TRIB1, EDNRB, DYNLL1, PAK2, MDFIC, GAB1, DUSP16, MS4A2, CDK5RAP3, PDGFC, SPRED1, FGD4, IBTK, IL6, VAV3, LIMK2, PIK3CB, TGFBR1, TGFBR2, DOCK7, PKIB, PRKCE, GRM1, P2RX7, ADCY9, PRKAR1A, GADD45A, IGFBP3, DUSP6	840	466	13528	1.3132638463110566	1.0	0.7433008385255337	74.85919765848146
GOTERM_BP_FAT	GO:0051254~positive regulation of RNA metabolic process	39	3.24459234608985	0.0739045865536245	MEF2C, GLIS3, ARNT2, MITF, SOX5, FHL2, RHOQ, SOX6, TCF7L2, WT1, CTNNB1, MDFIC, POU3F2, YAP1, RARB, MYSM1, ATF7IP, TBL1XR1, KLF7, IL6, KLF12, RFX4, ESRRG, RXRG, TEAD1, AFF1, WWTR1, PPARGC1A, BRCA1, AHR, ARHGEF11, HES1, BPTF, ETS1, GTF2F2, ZFPM2, FOXC1, IRF4, KLF4	840	481	13528	1.305791505791506	1.0	0.7440319046656765	75.12598865403041
GOTERM_BP_FAT	GO:0048864~stem cell development	5	0.4159733777038269	0.07407619278692404	NOTCH2, MSI2, KIT, TCF7L2, KLF4	840	26	13528	3.0970695970695967	1.0	0.7429289473913667	75.2093822777113
GOTERM_BP_FAT	GO:0044243~multicellular organismal catabolic process	5	0.4159733777038269	0.07407619278692404	P2RX7, PEPD, MMP8, MMP7, ADAMTS3	840	26	13528	3.0970695970695967	1.0	0.7429289473913667	75.2093822777113
GOTERM_BP_FAT	GO:0006357~regulation of transcription from RNA polymerase II promoter	56	4.658901830282862	0.07456463168915206	MEF2C, ARNT2, MITF, RHOQ, CITED1, CTNNB1, TRAK1, MED27, YAP1, RARB, BRD8, ATF7IP, TBL1XR1, RXRG, ZHX2, TLE1, PPARGC1A, AHR, HES1, MED15, BPTF, ZFPM2, FOXC1, TFAP2C, EID1, GLIS3, ZMYND11, LITAF, SOX5, FHL2, SOX6, TCF7L2, WT1, POU3F2, SIM2, KLF7, IL6, KLF12, KLF9, RFX4, TBX2, JARID2, TEAD1, SNAI2, WWTR1, FOXP1, BRCA1, PKNOX2, ID2, ETS1, GTF2F2, PRKAR1A, ID4, IRF4, HDAC8, KLF4	840	727	13528	1.2405318661164602	1.0	0.7433801371711655	75.44530007288414
GOTERM_BP_FAT	GO:0001525~angiogenesis	15	1.2479201331114809	0.0754727338054608	KLF5, RTN4, NRP2, IL8, TGFBR2, PTEN, SLIT2, CTNNB1, KDR, CXCL17, ROBO1, FGF1, RBPJ, ANGPT2, SCG2	840	148	13528	1.6322393822393821	1.0	0.7458481925559799	75.87828955005209
GOTERM_BP_FAT	GO:0007179~transforming growth factor beta receptor signaling pathway	8	0.6655574043261231	0.0767019019007392	FNTA, SMAD9, NLK, TGFBR1, TGFBR2, TGFBR3, TGFBRAP1, CITED1	840	60	13528	2.1473015873015875	1.0	0.7497849844254174	76.45288518207288
GOTERM_BP_FAT	GO:0051247~positive regulation of protein metabolic process	22	1.8302828618968388	0.07738001264055334	DLC1, CAV1, IL6, ANAPC5, TGFBR1, DOCK7, FKBP1A, NHLRC1, SKP1, PPARGC1A, BRCA1, AGTR1, MAPK1, EDNRB, CBLB, P2RX7, FNTA, PSMA5, SMURF1, IFT88, SAMD4A, CD28	840	243	13528	1.4580442876739172	1.0	0.75107183665511	76.76431949255665
GOTERM_BP_FAT	GO:0051493~regulation of cytoskeleton organization	14	1.1647254575707155	0.07928421196245175	DLC1, CAV1, RHOQ, RDX, BRCA1, CTNNB1, ARPC1B, CTTNBP2, P2RX7, PFN2, GSN, MAP4, SPTBN1, CLASP2	840	136	13528	1.657843137254902	1.0	0.7579362639512305	77.61818082405414
GOTERM_BP_FAT	GO:0043087~regulation of GTPase activity	13	1.0815307820299502	0.0793548292115951	ARFGAP3, VAV3, ASAP2, ASAP1, RABGAP1L, DOCK7, TBC1D22A, USP6NL, TBC1D16, RASGRP3, RAPGEF6, AGAP1, FGD4	840	123	13528	1.7021293070073558	1.0	0.7564024218028713	77.64926890692733
GOTERM_BP_FAT	GO:0046907~intracellular transport	51	4.242928452579035	0.079686732392898	ENAH, GRIK2, AP1S3, IMMP2L, NDE1, LONP2, ZFYVE16, TRAK1, STAM, DNAJC19, STX6, HSP90AA1, IPO8, TNNT2, MAPK1, MYRIP, LYST, IPO5, PEX26, SDCBP, AKAP6, ERC1, THOC1, ARFGAP3, STX7, EEA1, RIMS2, DTNBP1, SEC63, STX18, DUSP16, PPP3CB, TMED10, SEC22B, SCG5, APPBP2, NEFL, HSPA9, RHOBTB3, MYO1E, NLGN1, CBLB, SLC25A13, TOM1L1, ATP2A2, TOM1L2, GSK3B, SPTBN1, SYTL2, SMURF1, RERE	840	657	13528	1.2501413350728419	1.0	0.7560547724105635	77.79483811849755
GOTERM_BP_FAT	GO:0046777~protein amino acid autophosphorylation	10	0.8319467554076538	0.07998670593557254	CTTNBP2, VRK2, PAK2, NEK2, FYN, NLK, TGFBR1, DYRK1A, TAOK3, KIT	840	85	13528	1.8946778711484593	1.0	0.7555675528907063	77.92563225779516
GOTERM_BP_FAT	GO:0051258~protein polymerization	7	0.5823627287853578	0.0809866426554918	CTTNBP2, CAV1, GSN, PREX1, TUBG1, NEFL, GAS7	840	49	13528	2.3006802721088437	1.0	0.7581994293248204	78.35638601402479
GOTERM_BP_FAT	GO:0033043~regulation of organelle organization	20	1.6638935108153077	0.08118186227461974	DLC1, CAV1, NEK2, RHOQ, RDX, PPARGC1A, BRCA1, ATM, CTNNB1, CTTNBP2, ARPC1B, PLA2G4A, P2RX7, PFN2, GSN, MAP4, SPTBN1, TNKS, CLASP2, CD28	840	217	13528	1.4843098529734475	1.0	0.7572498357236521	78.43955096092104
GOTERM_BP_FAT	GO:0009791~post-embryonic development	9	0.7487520798668885	0.08166622244932581	MORC3, MYO1E, ARID5B, TGFBR1, CHST11, SEMA3C, SOX6, KLF4, CDH23	840	73	13528	1.985518590998043	1.0	0.7575794121655339	78.64458990705543
GOTERM_BP_FAT	GO:0042098~T cell proliferation	5	0.4159733777038269	0.08288760427573433	P2RX7, FYN, RIPK2, FKBP1A, ITGAM	840	27	13528	2.982363315696649	1.0	0.7611029130103237	79.15347492762686
GOTERM_BP_FAT	GO:0060070~Wnt receptor signaling pathway through beta-catenin	4	0.33277870216306155	0.08441219866421774	TBL1XR1, GSK3B, TCF7L2, CTNNB1	840	17	13528	3.789355742296919	1.0	0.7658261987437414	79.77262302569399
GOTERM_BP_FAT	GO:0051338~regulation of transferase activity	31	2.579034941763727	0.08455489809226693	FTMT, PARD3, CAV1, CDK5R1, HMGCR, PKHD1, KIT, PTEN, TRIB2, TRIB1, SERINC5, PAK2, MDFIC, GAB1, DUSP16, MS4A2, PDGFC, CDK5RAP3, SPRED1, FGD4, VAV3, PIK3CB, TGFBR1, TGFBR2, PKIB, GRM1, P2RX7, ADCY9, PRKAR1A, GADD45A, DUSP6	840	372	13528	1.3420634920634922	1.0	0.7646687743082339	79.82967634673551
GOTERM_BP_FAT	GO:0042060~wound healing	18	1.497504159733777	0.08479956584026233	PLAT, IL6, HPS5, ERBB3, PIK3CB, TGFBR2, STXBP1, ANXA5, DTNBP1, TIMP3, CD9, NOTCH2, HMCN1, CD36, CD44, GSN, P2RY1, SCARB1	840	191	13528	1.5177262528047868	1.0	0.7639465381877553	79.92714442132582
GOTERM_BP_FAT	GO:0060284~regulation of cell development	19	1.5806988352745424	0.08602773645229492	RTN4, XRCC5, CDK5R1, NLGN1, SOX5, KIT, SLIT2, MBP, HES1, TIAM1, ROBO1, TGFBR3, CDK5RAP3, ROBO2, ID4, POU3F2, CDK5RAP2, IGFBP3, NEFL	840	205	13528	1.492636469221835	1.0	0.7673215906438884	80.40972309137628
GOTERM_BP_FAT	GO:0032270~positive regulation of cellular protein metabolic process	21	1.747088186356073	0.08765318068492509	DLC1, CAV1, IL6, ANAPC5, TGFBR1, DOCK7, FKBP1A, NHLRC1, SKP1, PPARGC1A, BRCA1, AGTR1, MAPK1, EDNRB, P2RX7, FNTA, PSMA5, SMURF1, IFT88, SAMD4A, CD28	840	233	13528	1.4515021459227468	1.0	0.7722263114352574	81.03156344034001
GOTERM_BP_FAT	GO:0032268~regulation of cellular protein metabolic process	38	3.1613976705490847	0.08776109889873897	DLC1, CAV1, EIF5B, FKBP1A, NHLRC1, TIMP3, ZFP36L1, AGTR1, EDNRB, FNTA, MDFIC, EIF3E, GAB1, QKI, PDGFC, PUM2, EIF2B2, SAMD4A, CD28, FGD4, IBTK, IL6, ANAPC5, TGFBR1, DOCK7, SKP1, PRKCE, PPARGC1A, BRCA1, MAPK1, P2RX7, PSMA5, PRKAR1A, SMURF1, EEFSEC, IFT88, IGFBP3, PA2G4P4	840	474	13528	1.2910990556560176	1.0	0.7709532338280963	81.0721820530637
GOTERM_BP_FAT	GO:0043193~positive regulation of gene-specific transcription	10	0.8319467554076538	0.08955951179400556	MEF2C, HES1, IL6, BPTF, ETS1, RHOQ, IRF4, PPARGC1A, TCF7L2, CTNNB1	840	87	13528	1.8511220580186096	1.0	0.7764069140292182	81.73709696324877
GOTERM_BP_FAT	GO:0045165~cell fate commitment	14	1.1647254575707155	0.09042729436633665	TBX2, TGFBR1, POU6F2, MITF, SOX5, GAS1, SOX6, TCF7L2, KDR, CTNNB1, HES1, NOTCH2, FGF1, KLF4	840	139	13528	1.622062350119904	1.0	0.7781127179046546	82.04998404535768
GOTERM_BP_FAT	GO:0032868~response to insulin stimulus	11	0.9151414309484194	0.09093447013579521	SLC2A8, IRS2, GRB10, KAT2B, SORBS1, ERBB3, GAB1, PTPRA, RHOQ, SH2B2, PTPN1	840	100	13528	1.7715238095238097	1.0	0.7784066028253673	82.23049873979399
GOTERM_BP_FAT	GO:0032963~collagen metabolic process	5	0.4159733777038269	0.09218736023056742	P2RX7, PEPD, MMP8, MMP7, ADAMTS3	840	28	13528	2.875850340136054	1.0	0.7815378136680984	82.66910531168381
GOTERM_BP_FAT	GO:0030879~mammary gland development	8	0.6655574043261231	0.09403741486808773	CTTNBP2, CAV1, IRS2, AGPAT6, NRG3, NME1-NME2, TBX2, ERBB3	840	63	13528	2.0450491307634167	1.0	0.7868108776040479	83.29810128778502
GOTERM_BP_FAT	GO:0031098~stress-activated protein kinase signaling pathway	8	0.6655574043261231	0.09403741486808773	TNIK, MDFIC, TAOK3, GAB1, DUSP10, TNFRSF19, TRIB1, FGD4	840	63	13528	2.0450491307634167	1.0	0.7868108776040479	83.29810128778502
GOTERM_BP_FAT	GO:0048762~mesenchymal cell differentiation	7	0.5823627287853578	0.09421022895991707	NRP2, EDNRB, EOMES, TGFBR3, SEMA3C, FOXC1, CTNNB1	840	51	13528	2.210457516339869	1.0	0.7858267948461457	83.35574131406943
GOTERM_BP_FAT	GO:0014031~mesenchymal cell development	7	0.5823627287853578	0.09421022895991707	NRP2, EDNRB, EOMES, TGFBR3, SEMA3C, FOXC1, CTNNB1	840	51	13528	2.210457516339869	1.0	0.7858267948461457	83.35574131406943
GOTERM_BP_FAT	GO:0051146~striated muscle cell differentiation	10	0.8319467554076538	0.09458894362284312	TNNT2, GPHN, UTRN, AVPR1A, PPP3CB, RCAN1, RARB, ADAM12, CAPN3, FOXP1	840	88	13528	1.83008658008658	1.0	0.7856048017973901	83.48140039598275
GOTERM_BP_FAT	GO:0045935~positive regulation of nucleobase, nucleoside, nucleotide and nucleic acid metabolic process	48	3.9933444259567388	0.09549442188334734	MEF2C, GLIS3, ARNT2, MITF, SOX5, FHL2, RHOQ, SOX6, TCF7L2, WT1, CITED1, CTNNB1, RGMB, MDFIC, POU3F2, TNKS, PDGFC, YAP1, RARB, MYSM1, ATF7IP, KLF5, TBL1XR1, KLF7, IL6, SMAD9, KLF12, RFX4, TGFBR1, ESRRG, RXRG, TEAD1, AFF1, WWTR1, PPARGC1A, BRCA1, AHR, ARHGEF11, HES1, RNF8, MAPK1, BPTF, ETS1, GTF2F2, ZFPM2, FOXC1, IRF4, KLF4	840	624	13528	1.2388278388278389	1.0	0.7873037164777991	83.77821811046769
GOTERM_BP_FAT	GO:0021700~developmental maturation	11	0.9151414309484194	0.09564246671097659	HES1, AGPAT6, PLP1, CD44, STXBP1, MREG, KCNIP2, CDH5, KDR, FARP2, CTNNB1	840	101	13528	1.753983969825554	1.0	0.7862449528680189	83.82626559016082
GOTERM_BP_FAT	GO:0006611~protein export from nucleus	4	0.33277870216306155	0.09682287455312771	GSK3B, DUSP16, SMURF1, HSPA9	840	18	13528	3.578835978835979	1.0	0.7889069045184738	84.20458171588305
GOTERM_BP_FAT	GO:0018107~peptidyl-threonine phosphorylation	4	0.33277870216306155	0.09682287455312771	NLK, TGFBR1, TGFBR2, TNKS	840	18	13528	3.578835978835979	1.0	0.7889069045184738	84.20458171588305
GOTERM_BP_FAT	GO:0001937~negative regulation of endothelial cell proliferation	4	0.33277870216306155	0.09682287455312771	CTTNBP2, CAV1, PTPRM, SCG2	840	18	13528	3.578835978835979	1.0	0.7889069045184738	84.20458171588305
GOTERM_BP_FAT	GO:0043434~response to peptide hormone stimulus	15	1.2479201331114809	0.09685207667363696	IRS2, PLD1, KAT2B, ERBB3, PTPRA, RHOQ, SLC2A8, CTTNBP2, GRB10, SORBS1, GAB1, SH2B2, PTPN1, EIF2B2, NEFL	840	154	13528	1.5686456400742115	1.0	0.7874345108760743	84.21383404070166
GOTERM_BP_FAT	GO:0043405~regulation of MAP kinase activity	14	1.1647254575707155	0.0983702853948101	CAV1, HMGCR, PIK3CB, KIT, GRM1, TRIB2, TRIB1, P2RX7, MDFIC, GAB1, DUSP16, SPRED1, FGD4, DUSP6	840	141	13528	1.5990543735224585	1.0	0.7912429479661103	84.68786788767042
GOTERM_BP_FAT	GO:0001704~formation of primary germ layer	6	0.49916805324459235	0.0994449285017626	PRKAR1A, EOMES, FOXC1, KLF4, SLIT2, CTNNB1	840	40	13528	2.4157142857142855	1.0	0.7934300942679801	85.01524221707756
