# Supplementary material for: Transcription factor MITF and remodeller BRG1 define chromatin organisation at regulatory elements in melanoma cells
Source: eLife. 2015 Mar 24;4:e06857. doi: 10.7554/eLife.06857 (PMC4407272; doi:10.7554/eLife.06857)
Supplement: Supplementary file 5. — Excel spread sheet of primer sequences used for RT-qPCR and ChIP-qPCR. DOI: http://dx.doi.org/10.7554/eLife.06857.023 [file elife06857s005.xlsx]

## Sheet: Feuil1
RTqPCR
Locus	Forward Primer	Reverse Primer
Beta-ACT	ACATCTGCTGGAAGGTGGAC	CCCAGCACAATGAAGATCAA
MITF	GTACTTTGATTCCCAAGTCAAATGAT	AGTCCACGGATGCTTTTAAGAT
BRG1/SMARCA4	GCCTACCTCTTGCAGCAGAC	GCGTCTGTCCTTCTGCATTT
BAF170/SMARCC2	CTTGGTGCAGAATAATTGCCT	CGTGTCGTAACTGTCAGGAT
CDK2	AAATTCATGGATGCCTCTGC	TTTAAGGTCTCGGTGGAGGA
NUF2	TATCTGCCGGGTGAATGACT	ACGGCATGCTTCTCTGAAGT
LIG1	TGCTTCCCTCTCTGACACCT	TTCCAGGACTTCCTGAATGG
SPC25	GCAAAAAGCAGGAATTGGAA	TTCTGCAGCCTTTTCAACCT
CENPO	AACCCAACCAAACAGTGGAG	CGGCTGGTCAGTTTACCACT
TERT	CGGTGTGCACCAACATCTAC	GGGTTCTTCCAAACTTGCTG
SERPINE1	CAGACCAAGAGCCTCTCCAC	ATGCGGGCTGAGACTATGAC
CYR61	AGCTCAGTCAGAGGGCAGAC	GTTCTTGGGGACACAGAGGA
CTGF	GGCTTACCGACTGGAAGACA	ATCCCACAGGTCTTGGAACA
IL8	ACTGAGAGTGATTGAGAGTGGAC	AACCCTCTGCACCCAGTTTTC
CCL2	CAGCCAGATGCAATCAATGCC	TGGAATCCTGAACCCACTTCT
TYR	TGCACAGAGAGACGACTCTTG	GAGCTGATGGTATGCTTTGCTAA
DCT	AACTGCGAGCGGAAGAAACC	CGTAGTCGGGGTGTACTCTCT
TYRP1	TCTCTGGGCTGTATCTTCTTCC	GTCTGGGCAACACATACCACT
PMEL	AGGTGCCTTTCTCCGTGAG	AGCTTCAGCCAGATAGCCACT
c-MET	AGCGTCAACAGAGGGACCT	GCAGTGAACCTCCGACTGTATG
MLANA	GCTCACTTCATCTATGGTTACCC	GACTCCCAGGATCACTGTCAG
TRPM1	CCCTGCTGAAAGGAACAAAC	GCCCAAAGACAAAGATCTGG
EDNRB	GTCCCAATATCTTGATCGCCAG	AAGGCACCAGCTTACACATCT
BCL2	GGTGGGGTCATGTGTGTGG	CGGTTCAGGTACTCAGTCATCC
USP11	CACACATCACGGTTCTCGAT	GTCCTCATCCTCTTCCGACA
SHC4	ACATGGGCTGTGTTGAAGTG	ACTGGAGGCTTTCGCTTTTT
BIRC7	TGGCCTCCTTCTATGACTGG	GCACCTCACCTTGTCCTGAT
ChIPqPCR
PRM1	ACAGAGCGACACCCTGTCAT	AGGCGGTGGTTACACAACAT
GRM5	CCAGAACAGCATGTCCTTCA	GCATAGCAGATAAGGGACCC
GPC6	CCCCAATATGCAGTGCCTTAC	CCCTGTTGATATGTGAATGTGCT
DCT-1 (close DCT TTS)	GCTACATTTCCAGCCTTCACA	GGTTCTGAGAAATGAGGCCC
DCT (TSS)	ACATGACCCAAAGTGCACAA	TGACGAAGAGCTCACTGCAT
SLC5A4	AAGAGCAGACAGACCGAACA	GGGTTTGGTAAGTGATGACCC
GRP110-1	CAGTATTGTGGCGGAAAAGC	CATCTTGCATGGCCCCA
GPR110-2	CTCCCACAAACATCCCTCCT	ACTCTGCATGTGACCAAATGT
SOX6	CACTGCTGCTATGTGTGACA	CCTTCCTCAGTACAGCCCAT
FRMD4B	GAGGACTCACGGGTTGTAGT	CCTGGCCTGGTCTTTGGAA
UVRAG (TSS)	GTTACCACGGCAACCAGTG	AGGCGGGAGAGTCACCT
TYR	ACGAGCCAATTCGAAAGAAA	CACAGATTTCTCTTTCCAGCTAC
SOX10 (First intron)	TGTGCCCAGACTCTTGTTCG	TCACATGATTGCCGTTCACC
